# Supplementary material for: Wide transcriptional investigation unravel novel insights of the on-tree maturation and postharvest ripening of ‘Abate Fetel’ pear fruit
Source: PubMed Central journal article supplement (PMC6395599; doi:10.1038/s41438-018-0115-1), 2019-03-01
Supplement: 41438_2018_115_MOESM1_ESM.pdf [file 41438_2018_115_MOESM1_ESM.pdf]

Supplementary Fig. S1

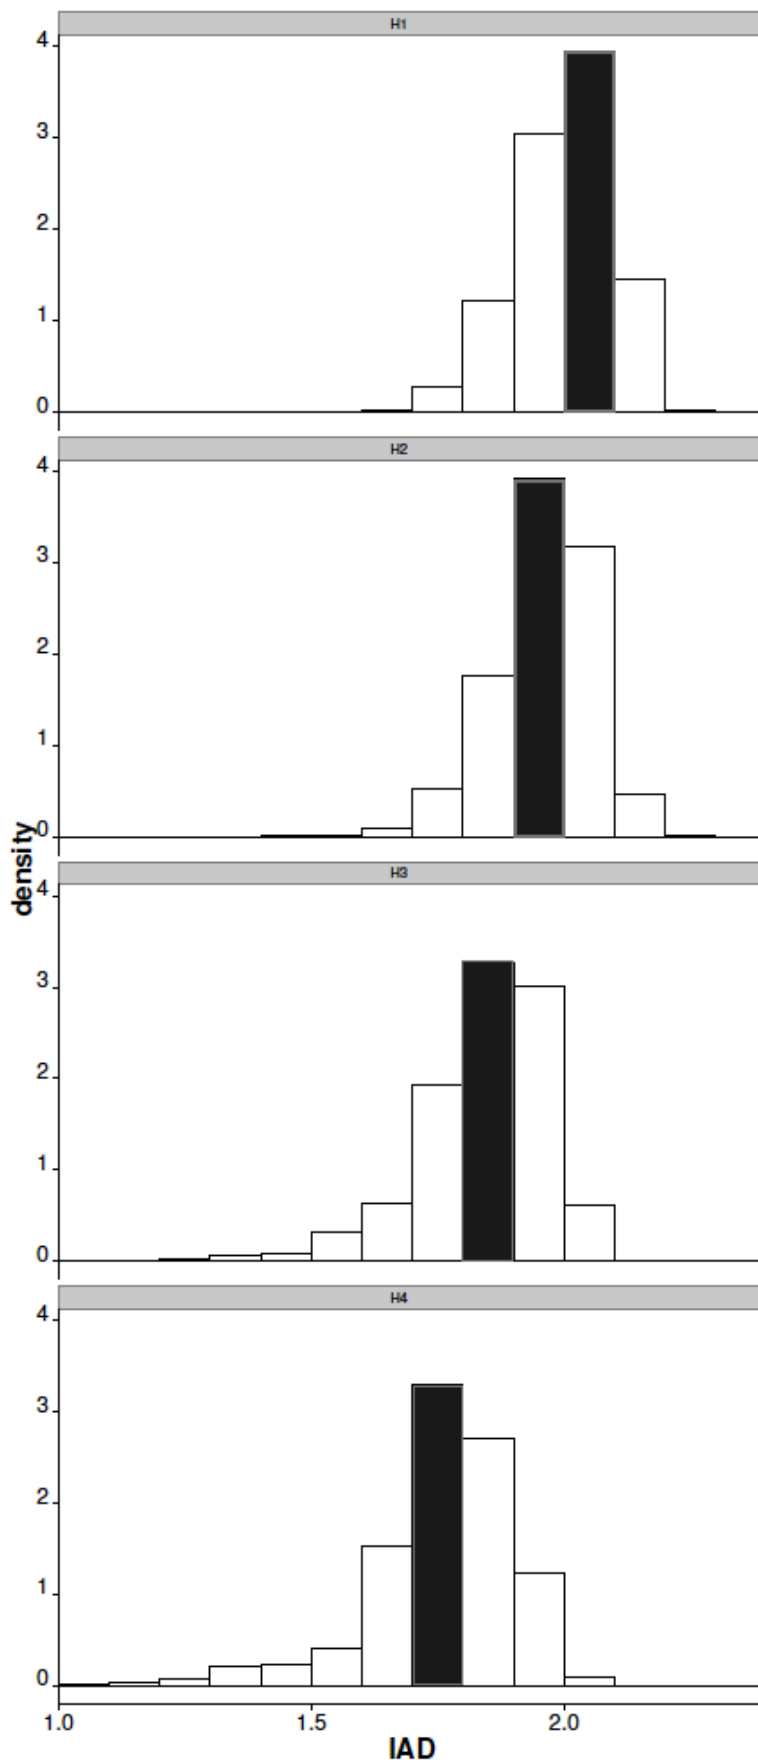

Supplementary Fig. S2

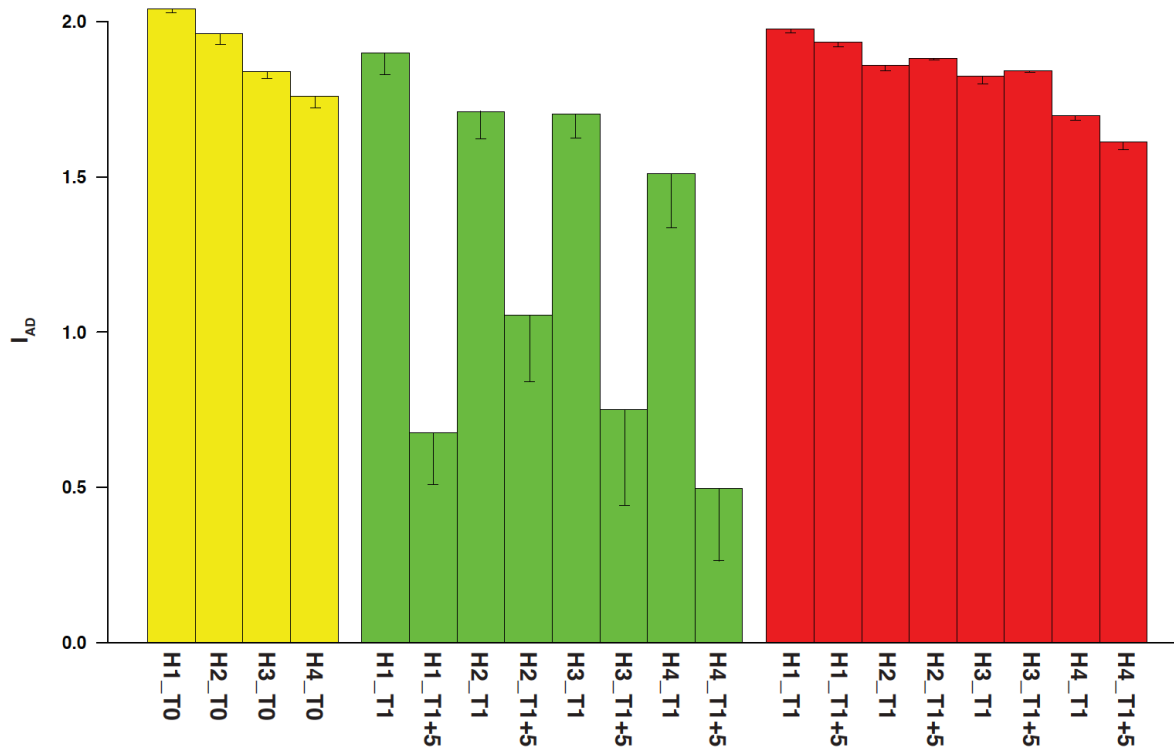

Supplementary Fig. S3

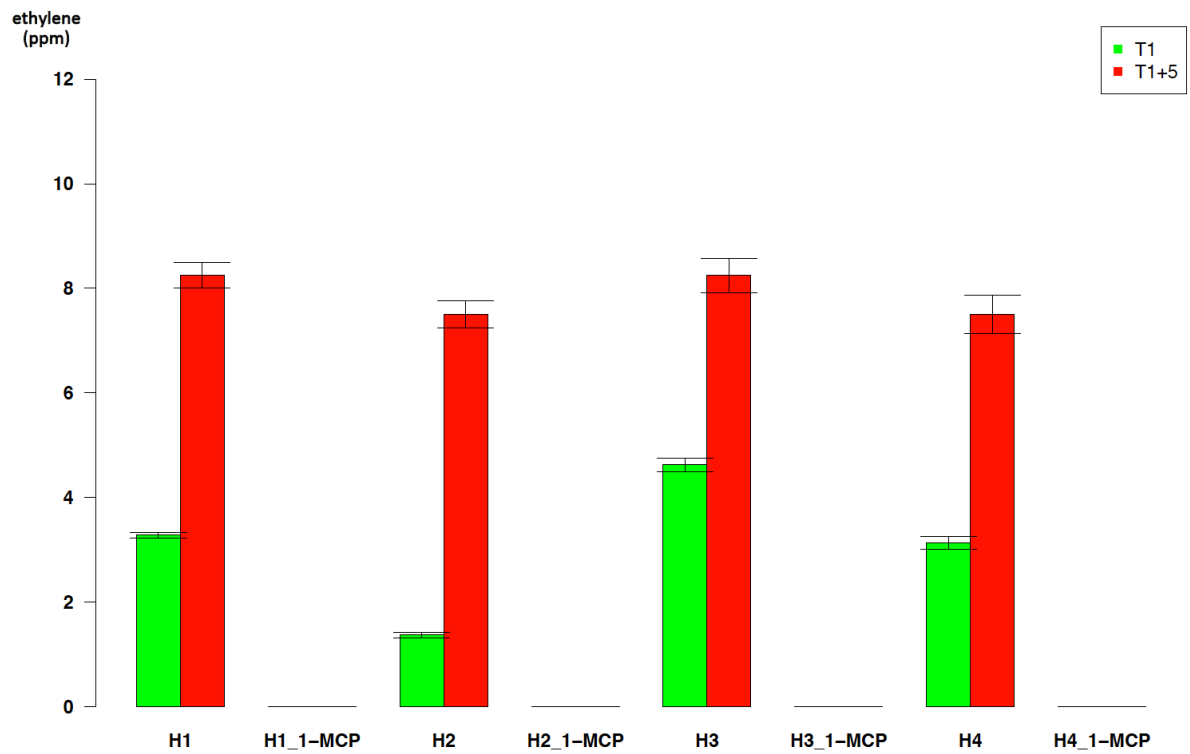

Supplementary Fig. S4

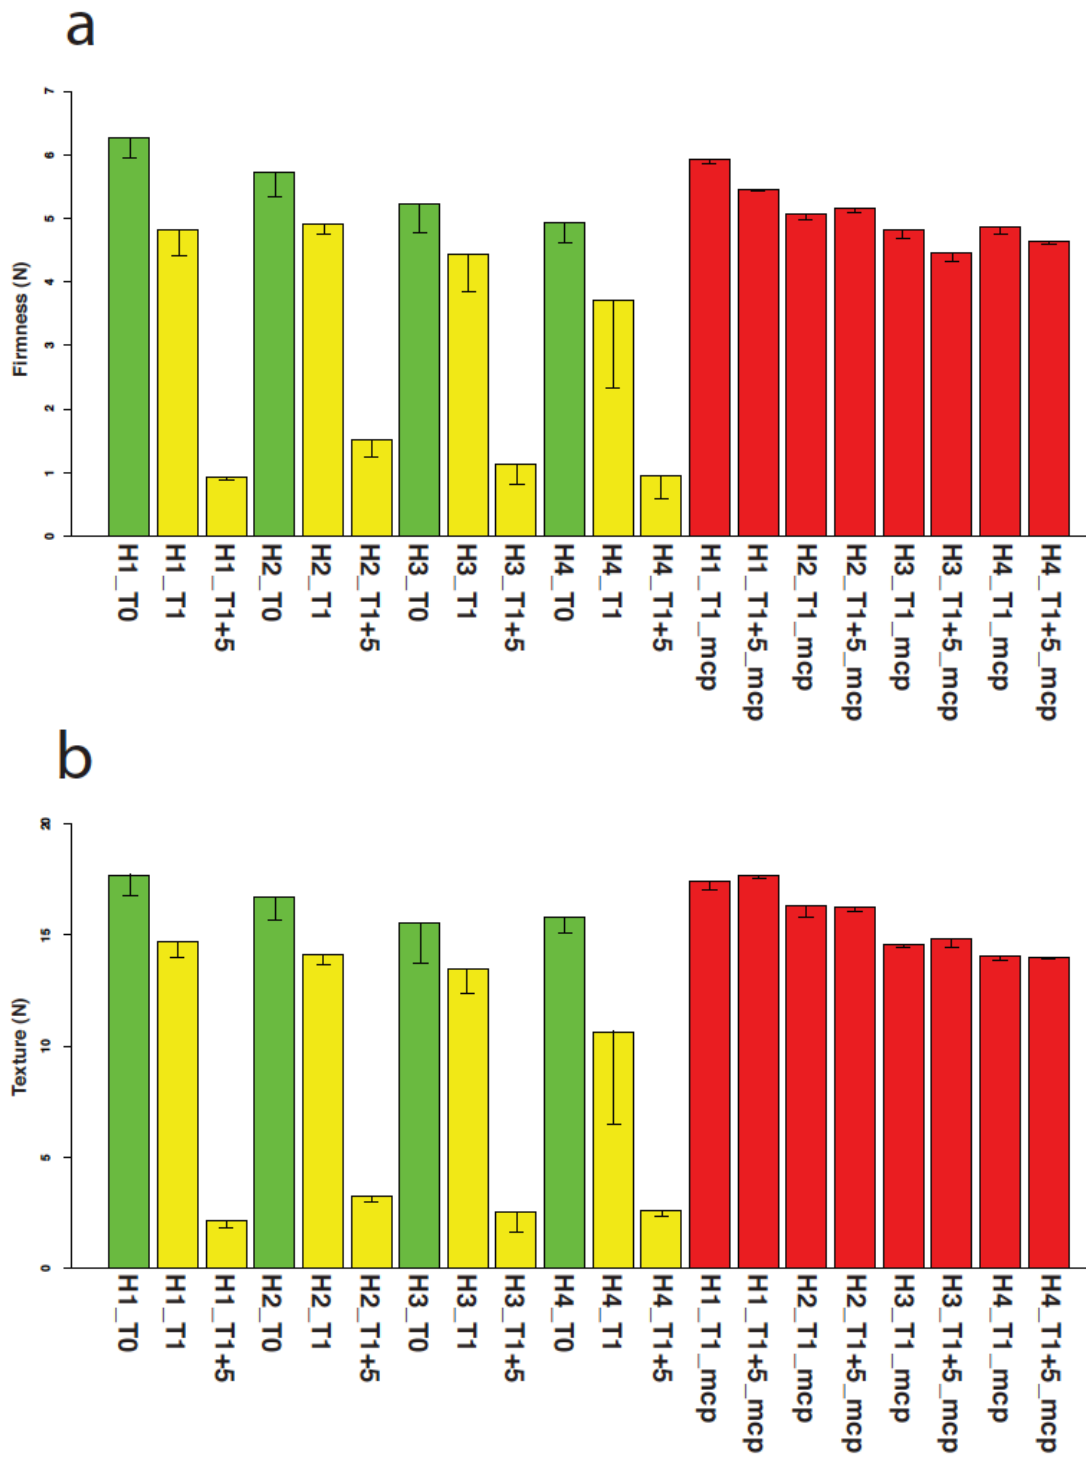

Supplementary Fig. S5

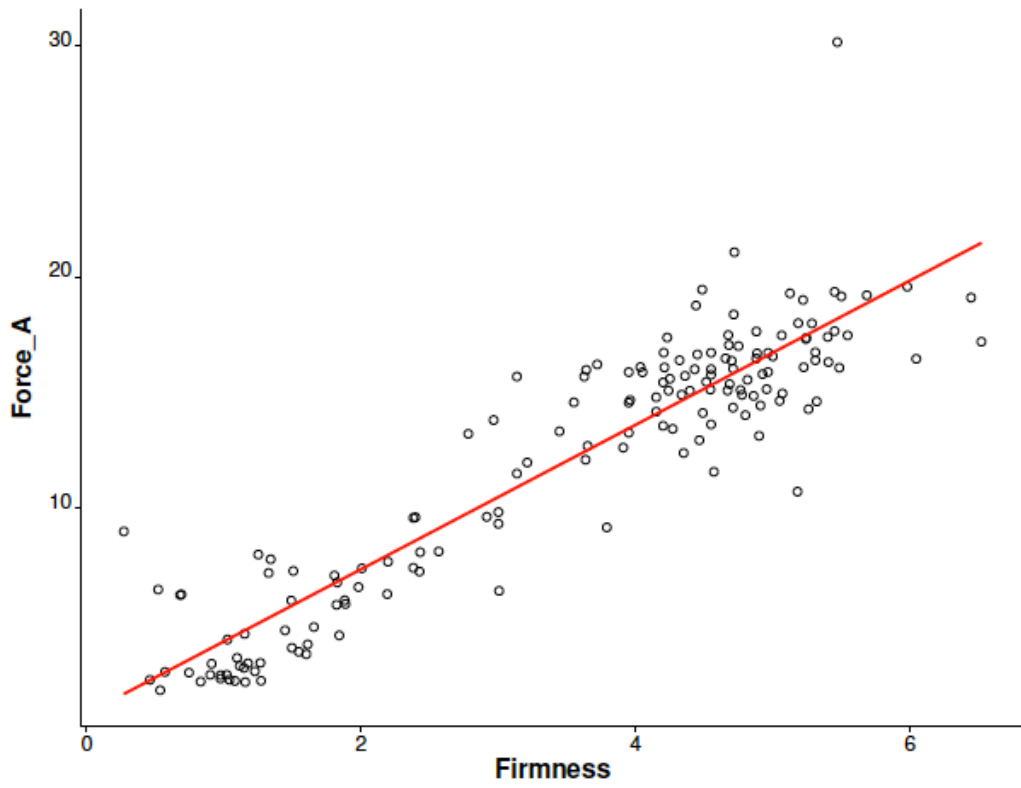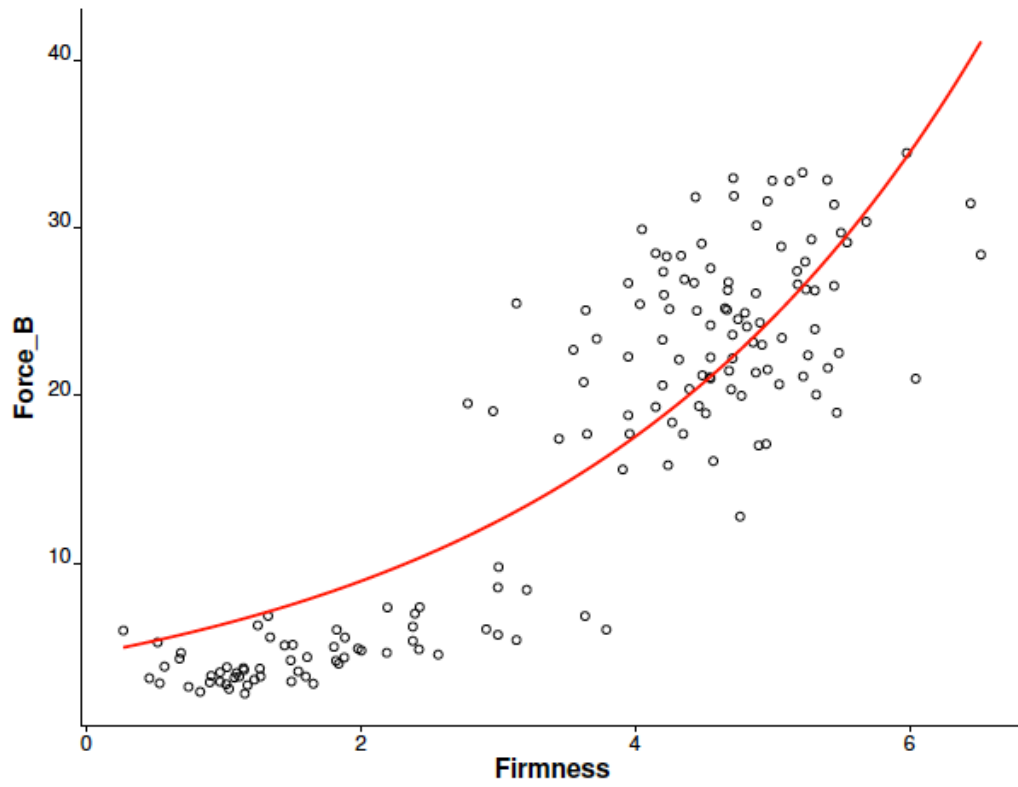

Supplementary Fig. S6

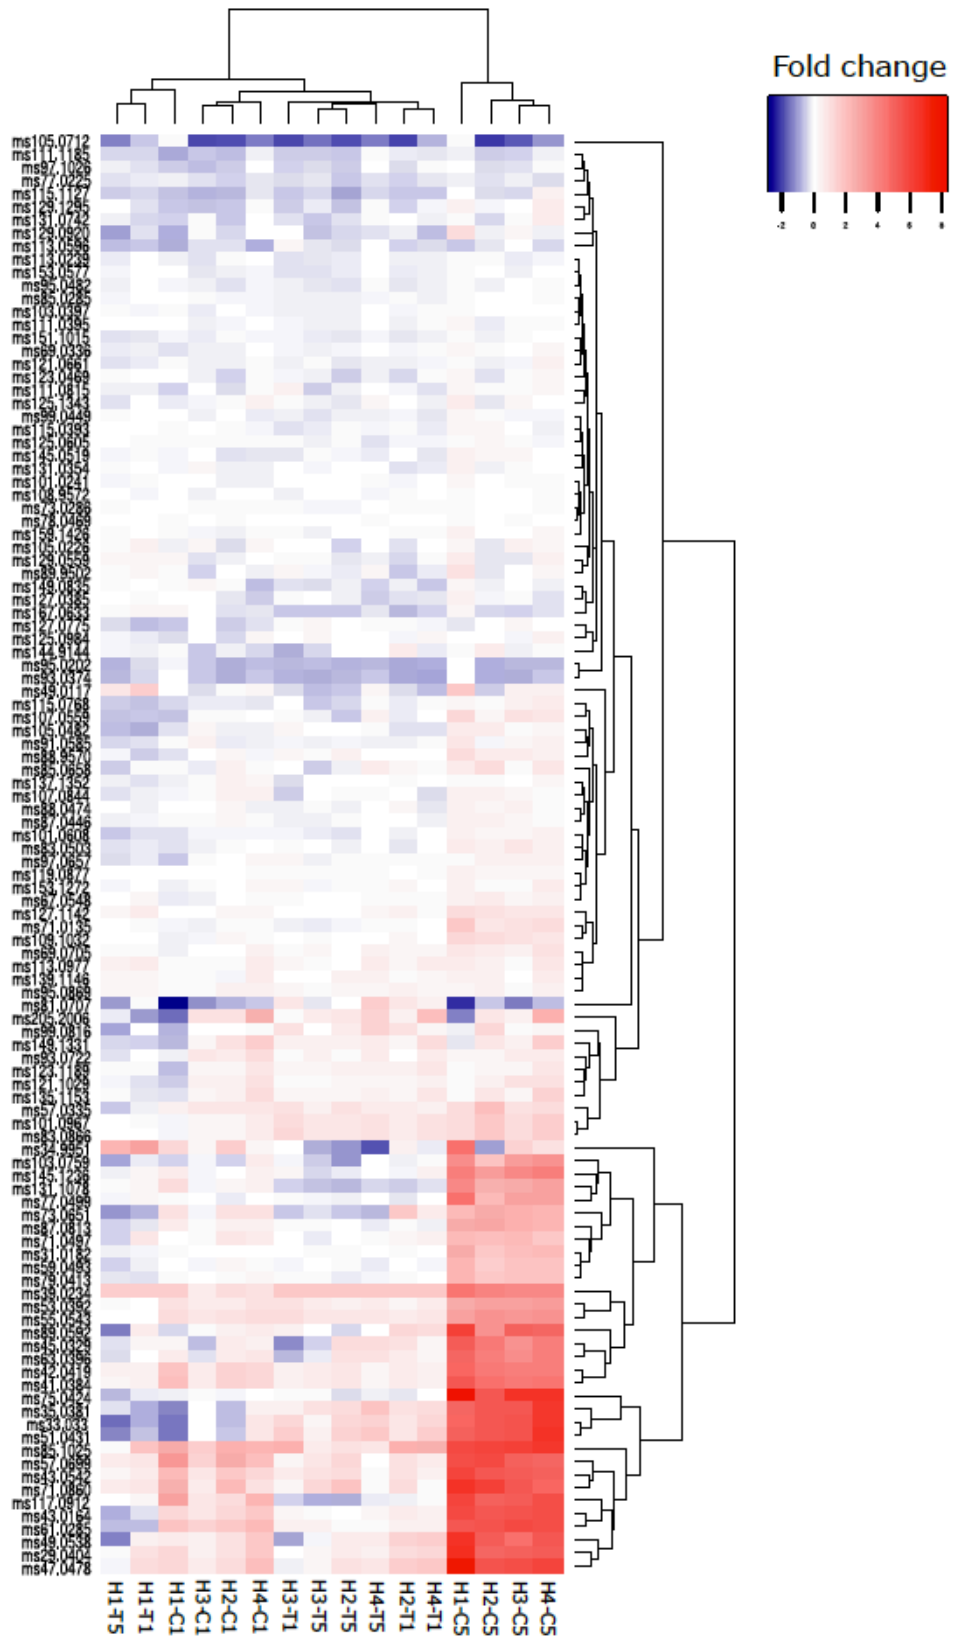

Supplementary Fig. S7

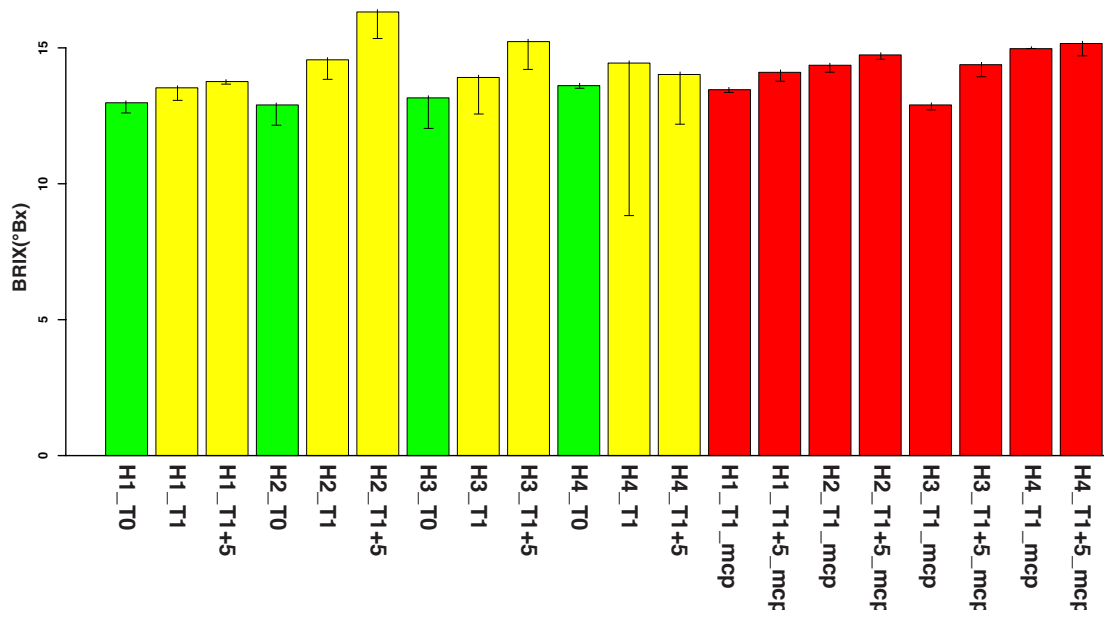

Supplementary Fig. S8

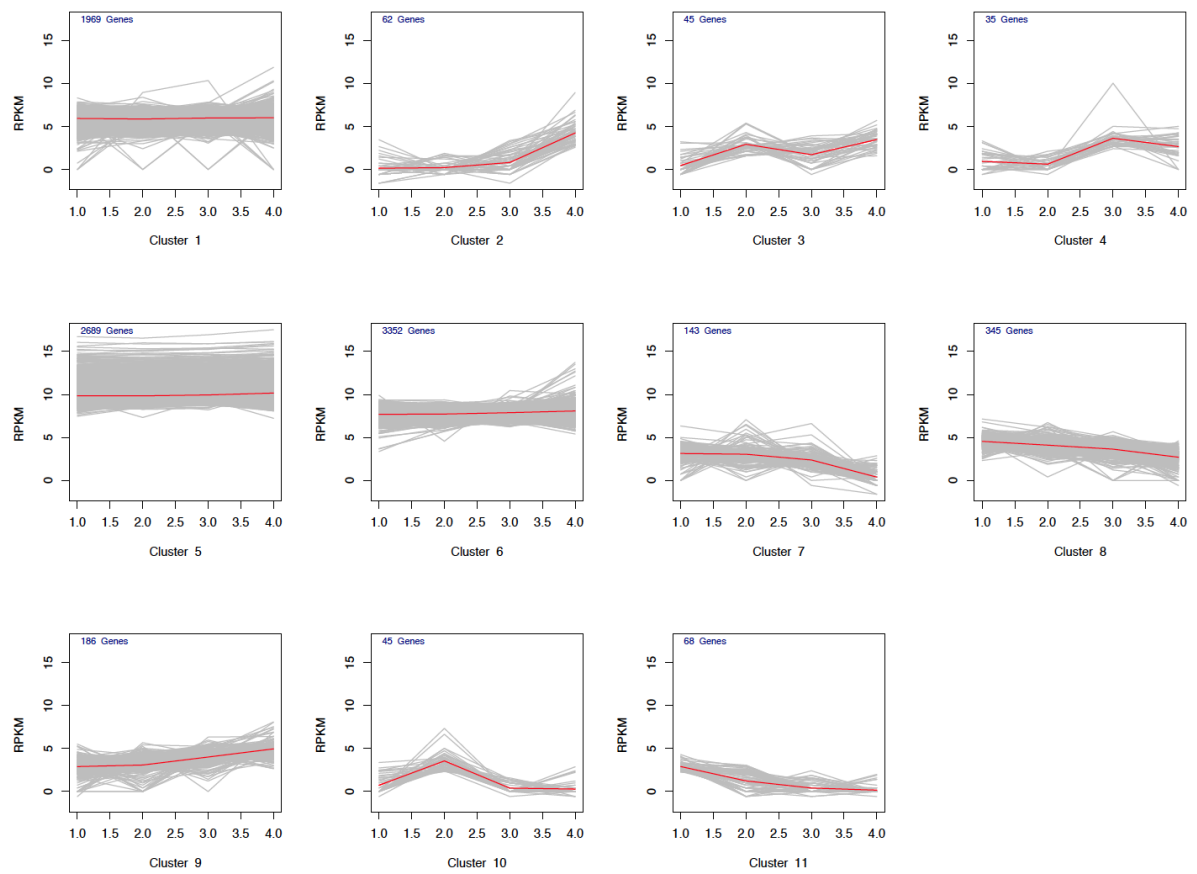

Supplementary Fig. S9

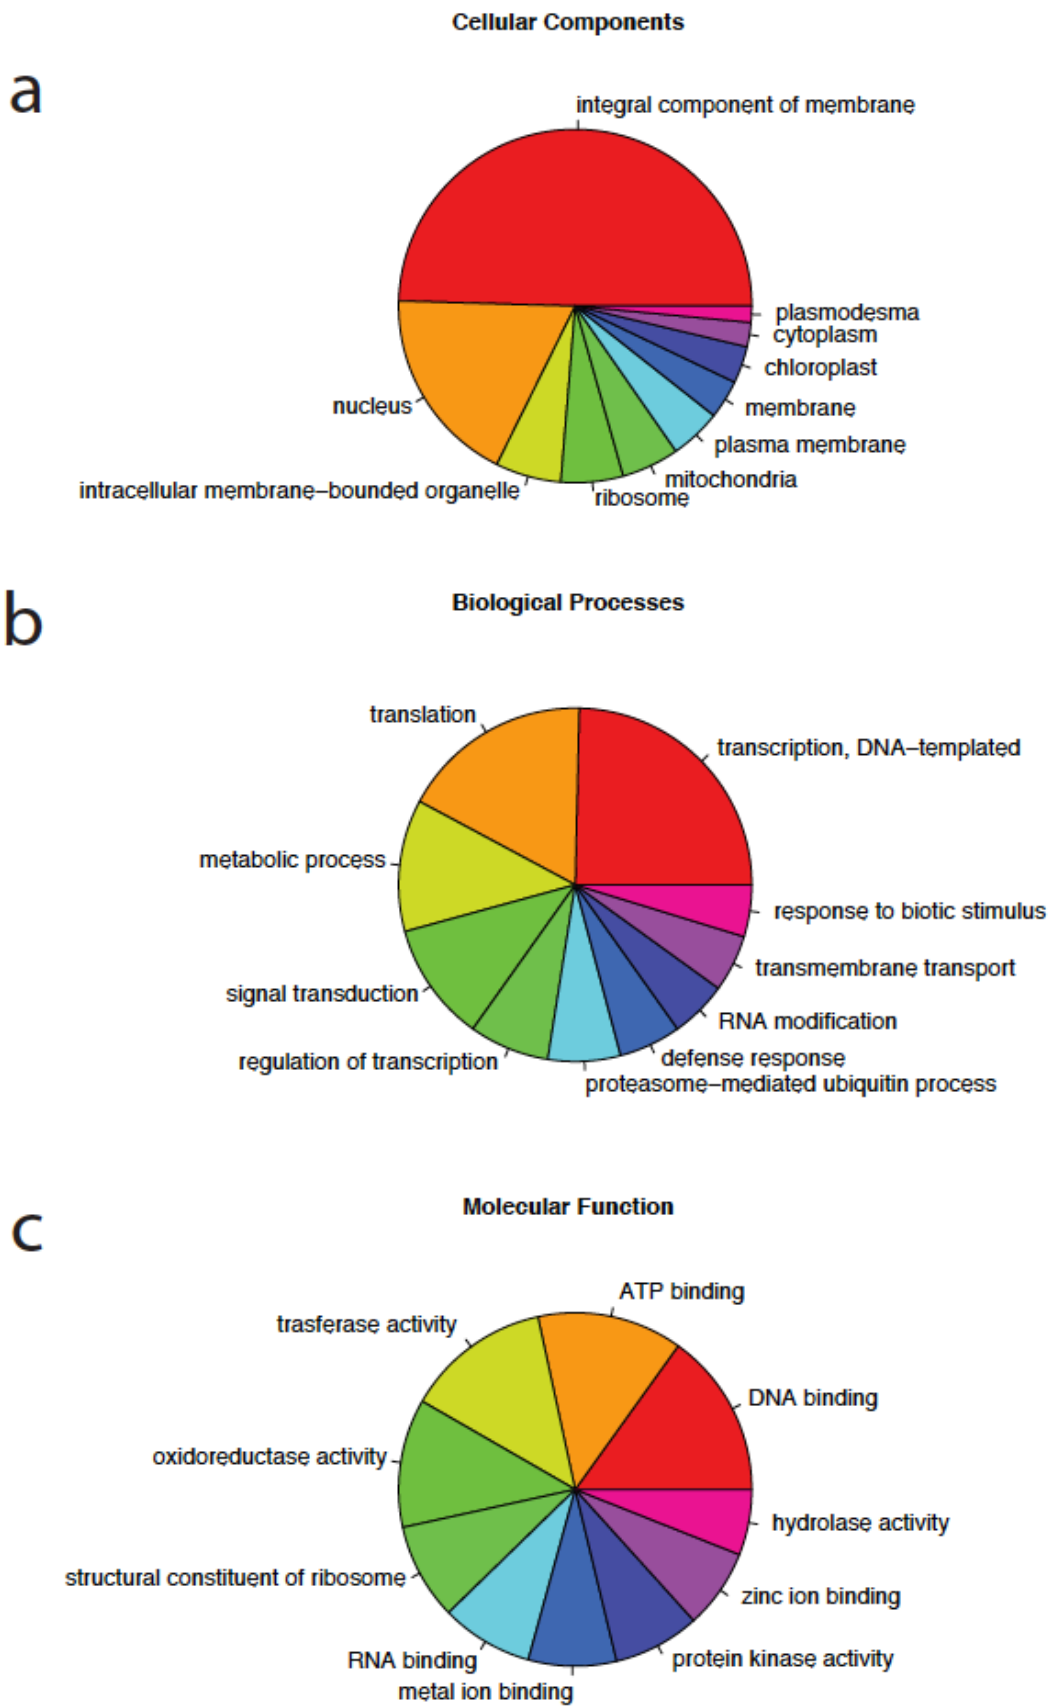

Supplementary Fig. S10

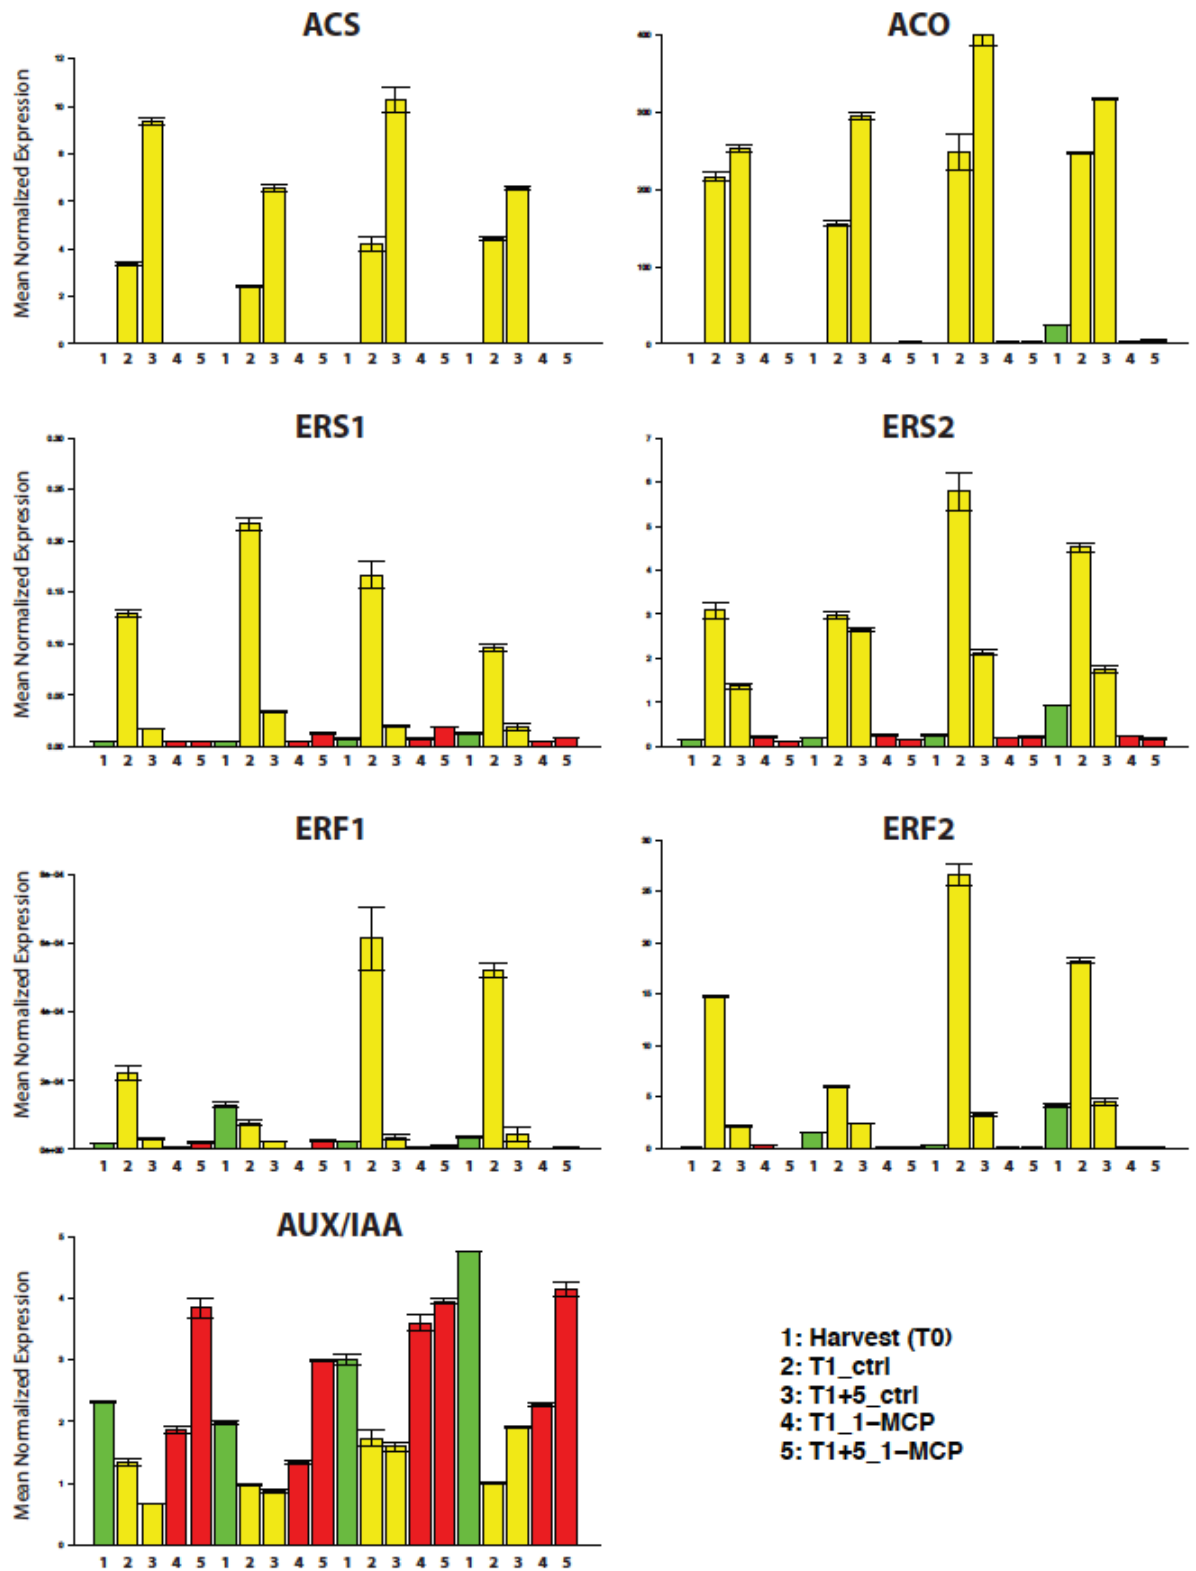



Supplementary Fig. S11

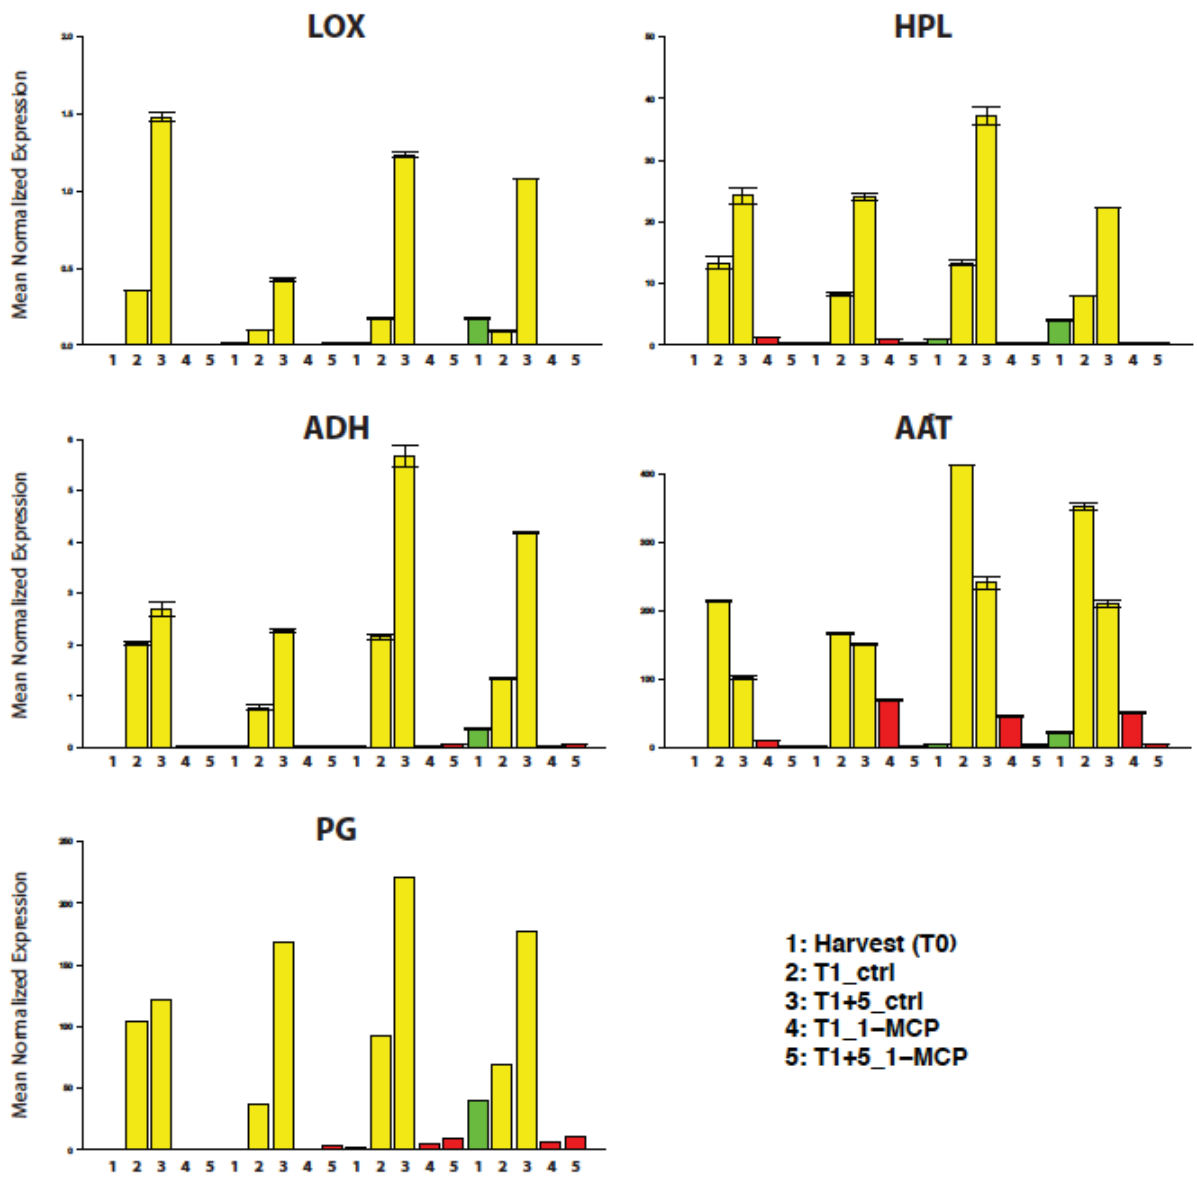

Supplementary Fig. S12

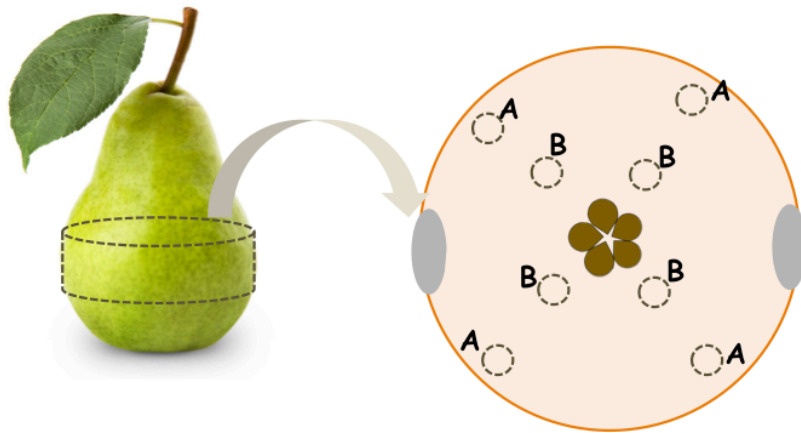

Supplementary Table S1

| <b>m/z</b> | <b>Formula</b> | <b>Identification</b>                                                                                                |
|------------|----------------|----------------------------------------------------------------------------------------------------------------------|
| 29,0404    | C2H5           | ethanol fragment                                                                                                     |
| 31,0182    | CH2OH          | Formaldehyde                                                                                                         |
| 33,033     | CH4OH          | methanol                                                                                                             |
| 34,9951    | H2SH           | Hydrogen sulfide                                                                                                     |
| 35,0381    |                |                                                                                                                      |
| 39,0234    | C3H3           | common fragment                                                                                                      |
| 41,0384    | C3H5           | common fragment                                                                                                      |
| 42,0419    |                |                                                                                                                      |
| 43,0164    | C2H3O          | common fragment                                                                                                      |
| 43,0542    | C3H7           | common fragment                                                                                                      |
| 45,0329    | C2H4OH         | Acetaldehyde                                                                                                         |
| 47,0478    | C2H6OH         | Ethanol                                                                                                              |
| 49,0117    | CH4SH          | Methanethiol                                                                                                         |
| 49,0538    | [13]C2H6OH     | second isotope of Ethanol                                                                                            |
| 51,0431    | CH4O*H3O       | methanol cluster                                                                                                     |
| 53,0392    | C4H5           |                                                                                                                      |
| 55,0543    | C4H7           | common fragment                                                                                                      |
| 57,0335    | C3H4OH         | common fragment                                                                                                      |
| 57,0699    | C4H9           | 1-Butanol, high alcohol fragment                                                                                     |
| 59,0493    | C3H6OH         | Acetone                                                                                                              |
| 61,0285    | C2H4O2H        | Acetic acid, Acetoin, common ester fragment                                                                          |
| 63,0396    | C2H6O2H        | Ethylene glycol                                                                                                      |
| 67,0548    | C5H7           |                                                                                                                      |
| 69,0336    | C4H4OH         | furan                                                                                                                |
| 69,0705    | C5H9           | isoprene, terpene fragment                                                                                           |
| 71,0135    |                |                                                                                                                      |
|            |                | Esters (Ethyl butanoate, Ethyl hexanoate, Propyl butanoate, Butyl butanoate, 2-Methylbutyl acetate, Isoamyl acetate) |
| 71,0497    | C4H6OH         | 3-methyl-1-butanol 2-methyl-1-butanol, 3-Pentanol, 1-Pentanol                                                        |
| 71,086     | C5H11          |                                                                                                                      |
| 73,0286    | C3H5O2         |                                                                                                                      |
| 73,0651    | C4H8OH         | butanal, isobutyraldehyde                                                                                            |
| 75,0424    | C3H6O2H        | Methyl Acetate                                                                                                       |
| 77,0225    |                |                                                                                                                      |
| 77,0499    | C3H8O2H        |                                                                                                                      |
| 78,0469    |                |                                                                                                                      |
| 79,0413    | C2H6O3O        |                                                                                                                      |
|            |                | Fragment of aldehydes (Hexenals); fragment of terpenes                                                               |
| 81,0707    | C6H9           |                                                                                                                      |
| 83,0503    | C5H6OH         | Methylfuran                                                                                                          |
|            |                | (E)-3-Hexen-1-ol, (Z)-3-Hexen-1-ol, (Z)-2-Hexen-1-ol,                                                                |
| 83,0866    | C6H11          | Hexanal,2-Hexanone                                                                                                   |
| 85,0285    | C4H5O2         | 2(5H)-Furanone                                                                                                       |
| 85,0658    | C5H8OH         |                                                                                                                      |
| 85,1025    | C6H13          | Hexanol                                                                                                              |
| 87,0446    | C4H6O2H        | Butyrolactone                                                                                                        |
| 87,0813    | C5H10OH        | 2-methyl butanal,3- methyl butanal, Pentanal                                                                         |
| 88,0474    |                |                                                                                                                      |
| 88,957     |                |                                                                                                                      |
| 89,0592    | C4H8O2H        | isotope of Ethyl Acetate, Butanoic Acid                                                                              |
| 89,9502    |                |                                                                                                                      |
| 91,0585    | C7H7           | Benzyl Alcohol                                                                                                       |

|          |          |                                                                          |
|----------|----------|--------------------------------------------------------------------------|
| 93,0374  | C3H8OSH  |                                                                          |
| 93,0722  | C7H9     | Toluene, Monoterpene fragment                                            |
| 95,0202  |          |                                                                          |
| 95,0482  | C6H7O    | phenol                                                                   |
| 95,0869  | C7H11    | 2-Heptenal, Monoterpene fragment                                         |
| 97,0657  | C6H8OH   | 2,4-Hexadienal                                                           |
| 97,1026  | C7H13    | Heptanal, fragment                                                       |
| 99,0449  | C5H7O2   | 5-Methylfuran-2(3H)-one                                                  |
| 99,0816  | C6H10OH  | 2-Hexenal, (2E)-Hexenal                                                  |
| 101,0241 |          |                                                                          |
| 101,0608 | C5H8O2H  | 2,3-Pentanedione                                                         |
| 101,0967 | C6H12OH  | Hexanal, hexanone                                                        |
| 103,0397 |          |                                                                          |
| 103,0759 | C5H10O2H | Isovaleric Acid, Pentanoic Acid                                          |
| 105,0226 |          |                                                                          |
| 105,0482 |          |                                                                          |
| 105,0712 | C8H9     | Styrene                                                                  |
| 107,0559 |          |                                                                          |
| 107,0844 | C8H10H   | Ethyl Benzene, Xylene                                                    |
| 108,9572 |          |                                                                          |
| 109,1032 | C8H13    |                                                                          |
| 111,0395 |          |                                                                          |
| 111,0815 | C7H10OH  | Heptadienal                                                              |
| 111,1185 | C8H15    | Octanal, Octenol                                                         |
| 113,0239 |          |                                                                          |
| 113,0596 | C6H8O2H  | Sorbic acid                                                              |
| 113,0977 | C7H12OH  | Heptenal, heptanone                                                      |
| 115,0393 |          |                                                                          |
| 115,0768 | C6H10O2H | Ethyl Crotonate (Ethyl (2E)-2-butenoate), 5-Ethylidihydro-2(3H)-Furanone |
| 115,1127 | C7H14OH  | heptanal/heptanone                                                       |
| 117,0912 | C6H12O2H | Isobutyl Acetate, Butyl Acetate, Hexanoic Acid                           |
| 119,0877 | C9H11    |                                                                          |
| 121,0661 | C8H8OH   | Phenylacetaldehyde                                                       |
| 121,1029 | C9H13    |                                                                          |
| 123,0469 | C4H10O2S |                                                                          |
| 123,1189 | C9H15    | nonenal                                                                  |
| 125,0605 | C7H8O2H  | Guaiacol                                                                 |
| 125,0984 | C8H12OH  |                                                                          |
| 125,1343 | C9H17    | nonanal, nonenol                                                         |
| 127,0385 |          |                                                                          |
| 127,0775 | C7H10O2H | 2(3H)-Furanone, dihydro-5-methyl-5-vinyl                                 |
| 127,1142 | C8H14OH  | 1-octen-3-one, 6-Methyl-5-Hepten-2-one, (E)-2-Octenal                    |
| 129,0559 |          |                                                                          |
| 129,092  | C7H12O2H |                                                                          |
| 129,1295 | C8H16OH  | 2-octanone, Octanal, 1-Octen-3-ol                                        |
| 131,0354 |          |                                                                          |
| 131,0742 |          |                                                                          |
| 131,1078 | C7H14O2H | Isoamyl Acetate, Benzene, Amyl Acetate, Heptanoic Acid                   |
| 135,1153 | C10H15   | HO-Trienol, trans-Carveol                                                |
| 137,1352 | C10H17   | monoterpenes, fragment of sesquiterpenes                                 |
| 139,1146 | C9H14OH  |                                                                          |
| 144,9144 |          |                                                                          |
| 145,0519 |          |                                                                          |
| 145,1236 | C8H16O2H | Ethyl Hexanoate, Hexyl Acetate, 2-Ethyl Hexanoic Acid                    |
| 149,0835 |          |                                                                          |
| 149,1331 | C11H17   |                                                                          |

|          |          |                                                |
|----------|----------|------------------------------------------------|
| 151,1015 |          |                                                |
| 153,0577 |          |                                                |
| 153,1272 | C10H16OH | HO-Trienol, Epoxylinool, 2,4-Decadienal , 2,6- |
| 159,1426 | C9H18O2H | dimethyl-3,7-octadiene-2,6-diol                |
| 167,0633 | C10H15O2 | Nonanoic acid                                  |
| 205,2006 | C15H24   | sesquiterpenes, farnesene                      |

## Supplementary Table S2

*Cluster 1*

| <b>Gene</b> | <b>H1</b>   | <b>H2</b>   | <b>H3</b>   | <b>H4</b>   |           |              |
|-------------|-------------|-------------|-------------|-------------|-----------|--------------|
| PCP000026   | 4,841469999 | 4,922673593 | 5,426264755 | 6,143026004 | PCP000026 | XM_008242675 |
| PCP000057   | 6,464831606 | 5,77267747  | 6,215872703 | 5,222263604 | PCP000057 | XM_018645828 |
| PCP000072   | 7,044394119 | 6,695854658 | 6,68187088  | 6,700439718 |           |              |
| PCP000075   | 6,938638658 | 6,785681319 | 6,539158811 | 6,62935662  | PCP000075 | XM_009358719 |
| PCP000093   | 5,333781501 | 5,64385619  | 5,781359714 | 6,31596467  | PCP000093 | XM_008375290 |
| PCP000099   | 5,058749412 | 5,48123435  | 5,681730355 | 6,156437068 | PCP000099 | XM_009375193 |
| PCP000116   | 4,624685811 | 5,02989455  | 5,946496941 | 6,291493053 | PCP000116 | XM_018651208 |
| PCP000121   | 6,397974049 | 6,375039431 | 6,272956308 | 6,051589621 | PCP000121 | XM_008375327 |
| PCP000144   | 5,914803677 | 5,77267747  | 6,828707735 | 6,31596467  | PCP000144 | XM_009378003 |
| PCP000166   | 5,357552005 | 5,357552005 | 5,700439718 | 6,375039431 | PCP000166 | XR_001790963 |
| PCP000168   | 5,115615931 | 5,403608584 | 4,938756261 | 4,437627248 | PCP000168 | XM_008381123 |
| PCP000202   | 6,272956308 | 5,977279923 | 6,122465658 | 5,815831566 | PCP000202 | XM_009339734 |
| PCP000205   | 5,544423562 | 5,321928095 | 5,209453366 | 4,73714592  |           |              |
| PCP000219   | 6,203005338 | 6,539158811 | 6,594996337 | 7,108524457 | PCP000219 | XM_008347515 |
| PCP000221   | 6,662917555 | 6,62935662  | 7,058857621 | 6,709704193 | PCP000221 | XM_009344708 |
| PCP000226   | 5,333781501 | 5,101397952 | 4,890933022 | 5,882643049 | PCP000226 | XM_018643286 |
| PCP000248   | 6,291493053 | 6,215872703 | 5,718909554 | 4,414812061 | PCP000248 | XM_008380910 |
| PCP000261   | 6,574858391 | 7,033423002 | 6,874428132 | 6,609843592 |           |              |
| PCP000262   | 4,874305166 | 5,64385619  | 6,653490009 | 6,279285561 |           |              |
| PCP000336   | 5,789990019 | 4,480911346 | 5,718909554 | 4,772413555 | PCP000336 | XM_008358112 |
| PCP000359   | 5,260402093 | 5,285402219 | 5,321928095 | 4,459431619 | PCP000359 | XM_009371788 |
| PCP000374   | 6,448405435 | 6,62935662  | 6,882643049 | 7,183188734 | PCP000374 | XM_009360918 |
| PCP000377   | 5,634302842 | 6,564835417 | 6,614709844 | 7,684187561 |           |              |
| PCP000385   | 7,176621973 | 6,815959618 | 6,448405435 | 6,209453366 | PCP000385 | XM_008341850 |
| PCP000393   | 6,448405435 | 7,139551352 | 6,285402219 | 5,101397952 |           |              |
| PCP000396   | 6,426264755 | 6,051589621 | 5,754887502 | 6,094447222 | PCP000396 | XM_008391439 |
| PCP000429   | 7,018700931 | 6,798698597 | 6,677085351 | 6,518377768 |           |              |
| PCP000459   | 6,196331634 | 6,414981143 | 5,345893086 | 5,087462841 | PCP000459 | XM_009353724 |
| PCP000479   | 4,890933022 | 5,014801602 | 4,841469999 | 5,789990019 |           |              |
| PCP000491   | 6,50779464  | 6,369291982 | 6,448405435 | 6,14974712  |           |              |
| PCP000492   | 6,333960351 | 6,196331634 | 6,523561956 | 7,051698368 |           |              |
| PCP000505   | 5,087462841 | 5,209453366 | 5,754887502 | 6,101608059 |           |              |
| PCP000507   | 6,539158811 | 6,266786541 | 6,397974049 | 6,196331634 | PCP000507 | XM_009364758 |
| PCP000513   | 6,72342204  | 6,38663853  | 6,700439718 | 6,369291982 |           |              |
| PCP000523   | 7,132679654 | 6,942514505 | 6,624539604 | 6,448405435 | PCP000523 | XM_009360558 |
| PCP000535   | 5,984817174 | 5,380937195 | 4,969472865 | 4,906890596 | PCP000535 | XM_009360579 |
| PCP000571   | 5,369117459 | 4,857980995 | 5,087462841 | 4,700439718 |           |              |
| PCP000585   | 5,969703088 | 6,122465658 | 6,363346321 | 7,196430001 |           |              |
| PCP000592   | 6,051589621 | 5,781359714 | 5,59484709  | 3,938285792 | PCP000592 | XM_009371384 |
| PCP000595   | 6,07317756  | 6,327866971 | 5,709566354 | 4,824258697 | PCP000595 | XM_009371379 |
| PCP000616   | 6,03716255  | 5,533874777 | 6,235152624 | 6,653490009 | PCP000616 | XM_008364789 |
| PCP000652   | 5,815831566 | 6,169925001 | 6,321928095 | 6,853870927 | PCP000652 | XM_009373896 |

|           |             |             |             |             |           |              |
|-----------|-------------|-------------|-------------|-------------|-----------|--------------|
| PCP000675 | 5,309976492 | 5,746043983 | 6,579994693 | 6,303780748 |           |              |
| PCP000686 | 5,196528361 | 4,772413555 | 5,073391816 | 4,169925001 | PCP000686 | XM_008368431 |
| PCP000690 | 7,554588852 | 6,763809907 | 5,48123435  | 2,503348735 | PCP000690 | XM_008380532 |
| PCP000733 | 5,156639311 | 3,700439718 | 4,414812061 | 5,824513297 | PCP000733 | XM_009370513 |
| PCP000736 | 6,798698597 | 6,68187088  | 6,609843592 | 6,272956308 |           |              |
| PCP000771 | 6,007419784 | 5,614709844 | 5,513174885 | 5,285402219 | PCP000771 | XM_008380613 |
| PCP000857 | 3,321928095 | 4,718635616 | 5,115615931 | 5,285402219 |           |              |
| PCP000901 | 4,890933022 | 5,222263604 | 5,841218374 | 5,849749117 | PCP000901 | XM_018647720 |
| PCP000916 | 6,297741678 | 6,189824559 | 6,910852562 | 6,768184325 |           |              |
| PCP000948 | 6,84962403  | 5,247927513 | 5,824513297 | 5,392317423 | PCP000948 | XM_009375113 |
| PCP000979 | 6,345715709 | 6,677085351 | 6,579994693 | 6,235152624 | PCP000979 | XM_018642479 |
| PCP000989 | 6,247927513 | 5,961854808 | 5,992541859 | 5,798828178 |           |              |
| PCP001044 | 6,015024705 | 6,345715709 | 6,95419631  | 7,235248379 | PCP001044 | XM_009376771 |
| PCP001065 | 6,291493053 | 6,351734323 | 6,397974049 | 7,173227395 | PCP001065 | XR_528319    |
| PCP001078 | 6,266786541 | 6,363346321 | 6,87036472  | 7,209453366 | PCP001078 | XM_008353511 |
| PCP001084 | 6,297741678 | 6,375039431 | 6,209453366 | 5,369117459 | PCP001084 | XM_009361128 |
| PCP001116 | 6,163297449 | 6,279285561 | 6,497133304 | 5,754887502 | PCP001116 | XM_009381049 |
| PCP001143 | 6,380764075 | 5,309976492 | 5,533874777 | 5,882643049 | PCP001143 | XM_008342459 |
| PCP001165 | 6,534030467 | 6,62935662  | 6,513016928 | 6,321928095 | PCP001165 | XM_009345168 |
| PCP001166 | 5,709566354 | 6,718772592 | 6,215872703 | 5,672425342 |           |              |
| PCP001172 | 6,459431619 | 6,06608919  | 6,080444483 | 5,584962501 | PCP001172 | XM_018647789 |
| PCP001176 | 5,914803677 | 6,163297449 | 6           | 7,247927513 | PCP001176 | XM_009344504 |
| PCP001183 | 6,807354922 | 6,14974712  | 6,351734323 | 6,222456826 | PCP001183 | XM_009348813 |
| PCP001209 | 3,663344619 | 5,309976492 | 4,790250739 | 5,914803677 |           |              |
| PCP001236 | 5,169925001 | 5,101397952 | 6,266786541 | 5,437294331 | PCP001236 | XM_009341441 |
| PCP001270 | 7,037052702 | 6,579994693 | 6,564835417 | 6,481072857 |           |              |
| PCP001291 | 6,414981143 | 6,143026004 | 5,95419631  | 5,02989455  | PCP001291 | XM_009363494 |
| PCP001299 | 6,750472519 | 6,38663853  | 6,981053471 | 6,574858391 | PCP001299 | XM_009358665 |
| PCP001300 | 6,266786541 | 5,922911406 | 6,327866971 | 6,86628983  | PCP001300 | XM_009358666 |
| PCP001313 | 6,60481265  | 5,866166169 | 5,564683017 | 4,857980995 | PCP001313 | XM_009370302 |
| PCP001334 | 4,969472865 | 5,101397952 | 4,029452886 | 4,222650022 | PCP001334 | XM_009362985 |
| PCP001360 | 6,03716255  | 5,807354922 | 5,815831566 | 6,589913261 | PCP001360 | XM_009335658 |
| PCP001362 | 5,087462841 | 5,142821844 | 6,837060204 | 6,653490009 | PCP001362 | XM_018642470 |
| PCP001389 | 5,403608584 | 5,906890596 | 7,398059585 | 6,513016928 | PCP001389 | XM_008390000 |
| PCP001399 | 5,101397952 | 5,502394256 | 5,48123435  | 6,07317756  | PCP001399 | XM_009349029 |
| PCP001400 | 4,297925053 | 5,260402093 | 6,163297449 | 5,48123435  | PCP001400 | XM_018645401 |
| PCP001421 | 6,196331634 | 6,044394119 | 5,533874777 | 3,906890596 | PCP001421 | XM_017332283 |
| PCP001434 | 6,321928095 | 6,339850003 | 6,327866971 | 5,807354922 | PCP001434 | XM_018644074 |
| PCP001453 | 4,029452886 | 5,101397952 | 5,426264755 | 4,321928095 | PCP001453 | XM_020556076 |
| PCP001489 | 6,619559738 | 5,961854808 | 5,807354922 | 5,672425342 |           |              |
| PCP001506 | 6,80309785  | 6,820178962 | 6,828707735 | 6,534030467 | PCP001506 | XM_009336436 |
| PCP001513 | 6,24164954  | 5,781359714 | 5,832890014 | 6,84962403  | PCP001513 | XM_009344464 |
| PCP001524 | 6,31596467  | 6,497133304 | 6,589913261 | 7,206232954 |           |              |
| PCP001593 | 6,029673735 | 5,914803677 | 6,475733431 | 7,423494135 | PCP001593 | XM_009337756 |
| PCP001618 | 6,303780748 | 6,327866971 | 5,961854808 | 5,544423562 |           |              |
| PCP001681 | 6,339850003 | 6,266786541 | 6,62935662  | 6,958030641 | PCP001681 | XM_009351542 |

|           |             |             |             |             |           |              |
|-----------|-------------|-------------|-------------|-------------|-----------|--------------|
| PCP001711 | 6,051589621 | 6,22881869  | 6,695854658 | 7,029784146 | PCP001711 | XR_666319    |
| PCP001736 | 6,409390936 | 6,564835417 | 6,658211483 | 7,105070402 | PCP001736 | XM_017336725 |
| PCP001741 | 6,828707735 | 7,22881869  | 6,22881869  | 5,815831566 | PCP001741 | XM_009378118 |
| PCP001747 | 6           | 6,260590275 | 6,339850003 | 6,81159947  |           |              |
| PCP001755 | 5,64385619  | 5,634302842 | 5,824513297 | 6,491853096 | PCP001755 | XM_009338375 |
| PCP001822 | 5,235344128 | 5,691254979 | 6,464831606 | 6,475733431 | PCP001822 | XM_009357987 |
| PCP001823 | 4,64385619  | 5,196528361 | 5,235344128 | 4,459431619 |           |              |
| PCP001867 | 5,57500972  | 4,624685811 | 6,06608919  | 4,604664415 | PCP001867 | XM_018649989 |
| PCP001872 | 6,709704193 | 6,961970533 | 6,409390936 | 5,815831566 | PCP001872 | XM_018649994 |
| PCP001904 | 5,798828178 | 5,832890014 | 6,426264755 | 6,862079387 | PCP001904 | XM_008357041 |
| PCP001959 | 5,60496087  | 6,156437068 | 5,624393382 | 4,64385619  | PCP001959 | XM_009372167 |
| PCP001991 | 6,122465658 | 6,07317756  | 6,38663853  | 7,111970261 | PCP001991 | XM_009348250 |
| PCP002005 | 6,709704193 | 6,68187088  | 6,491853096 | 7,087462841 |           |              |
| PCP002029 | 6,297741678 | 6,291493053 | 5,961854808 | 5,653346693 | PCP002029 | XM_008374446 |
| PCP002050 | 6,841344192 | 6,518377768 | 6,523561956 | 6,454011343 | PCP002050 | XM_008380541 |
| PCP002056 | 3,663344619 | 7,336908182 | 4,297925053 | 8,385129006 |           |              |
| PCP002059 | 4,544114402 | 5,448570626 | 5,222263604 | 7,269874722 | PCP002059 | XM_009363568 |
| PCP002071 | 6,50779464  | 6,80309785  | 6,369291982 | 6,03716255  |           |              |
| PCP002073 | 6,247927513 | 6,727920455 | 6,68187088  | 6,442943496 | PCP002073 | XM_008346541 |
| PCP002090 | 7,139551352 | 6,653490009 | 6,874428132 | 6,554588852 |           |              |
| PCP002101 | 5,48123435  | 5,857980995 | 5,832890014 | 5,369117459 | PCP002101 | XM_009374978 |
| PCP002204 | 6,481072857 | 6,122465658 | 6,403778984 | 5,663059924 |           |              |
| PCP002226 | 6,977279923 | 6,143026004 | 6,272956308 | 6,31596467  | PCP002226 | XM_009343017 |
| PCP002233 | 6,95419631  | 6,029673735 | 6,47037417  | 5,681730355 | PCP002233 | XM_009343008 |
| PCP002260 | 6,260590275 | 6,22881869  | 6,203005338 | 5,866166169 | PCP002260 | XM_018651419 |
| PCP002264 | 6,523561956 | 6,272956308 | 6,518377768 | 5,763677142 | PCP002264 | XM_009376088 |
| PCP002281 | 5,333781501 | 4,64385619  | 5,691254979 | 6,156437068 | PCP002281 | XM_009353152 |
| PCP002307 | 6,101608059 | 5,736875423 | 4,523561956 | 3,502075956 | PCP002307 | XM_009356432 |
| PCP002308 | 3,544732656 | 4,247927513 | 4,790250739 | 5,544423562 | PCP002308 | XM_008376929 |
| PCP002320 | 4,321928095 | 4,297925053 | 4,807354922 | 7,176621973 | PCP002320 | XM_009356413 |
| PCP002354 | 6,639087423 | 6,403778984 | 6,72342204  | 7,115511897 | PCP002354 | XM_009365934 |
| PCP002359 | 5,922911406 | 6,491853096 | 6,38663853  | 6,080444483 |           |              |
| PCP002363 | 5,129283017 | 5,129283017 | 5,584962501 | 6,297741678 | PCP002363 | XM_008370205 |
| PCP002370 | 6,874428132 | 6,333960351 | 5,554588852 | 4,857980995 | PCP002370 | XM_009351585 |
| PCP002371 | 6,737010678 | 6,785681319 | 6,481072857 | 6,50779464  | PCP002371 | XM_017324171 |
| PCP002387 | 6,910852562 | 6,454011343 | 6,481072857 | 5,938521046 | PCP002387 | XM_008359999 |
| PCP002389 | 6,946379968 | 6,54951516  | 6,594996337 | 5,754887502 |           |              |
| PCP002390 | 5,260402093 | 5,807354922 | 5,930737338 | 7,754887502 |           |              |
| PCP002403 | 6,209453366 | 5,984817174 | 6,667750232 | 7,651051691 | PCP002403 | XM_017331441 |
| PCP002406 | 7,037052702 | 6,714245518 | 5,946496941 | 5,129283017 | PCP002406 | XM_009336338 |
| PCP002440 | 6,058965822 | 6,291493053 | 6,235152624 | 5,614709844 | PCP002440 | XM_009375283 |
| PCP002447 | 6,47037417  | 5,459431619 | 6,183288001 | 5,437294331 |           |              |
| PCP002453 | 5,02989455  | 5,898933872 | 4,906890596 | 4,029452886 | PCP002453 | XM_009349390 |
| PCP002461 | 6,209453366 | 6,176522247 | 6,486553493 | 6,996275749 | PCP002461 | XM_009381151 |
| PCP002504 | 4,059182199 | 4,369466484 | 6,409390936 | 4,985044962 | PCP002504 | XM_008352334 |
| PCP002508 | 6,209453366 | 5,736875423 | 5,544423562 | 5,614709844 | PCP002508 | XM_008390628 |



|           |             |             |             |             |           |              |
|-----------|-------------|-------------|-------------|-------------|-----------|--------------|
| PCP002510 | 6,442943496 | 6,741466986 | 6,653490009 | 6,279285561 | PCP002510 | XR_001788592 |
| PCP002575 | 6,029673735 | 6,260590275 | 6,357552005 | 6,785681319 | PCP002575 | XM_009350276 |
| PCP002599 | 5,101397952 | 6,176522247 | 5,969703088 | 5,634302842 | PCP002599 | XM_009336313 |
| PCP002627 | 4,969472865 | 5,183089461 | 4,754887502 | 4,143230135 | PCP002627 | XM_018647160 |
| PCP002653 | 5,914803677 | 6,094447222 | 6,143026004 | 6,667750232 |           |              |
| PCP002675 | 5,415150205 | 5,866166169 | 6,882643049 | 7,794415866 | PCP002675 | XM_009348026 |
| PCP002684 | 5,285402219 | 5,634302842 | 5,115615931 | 4,841469999 | PCP002684 | XM_009380652 |
| PCP002696 | 5,297558281 | 5,309976492 | 5,584962501 | 6,339850003 | PCP002696 | XM_009342219 |
| PCP002709 | 6,60481265  | 6,754887502 | 6,87036472  | 6,392317423 | PCP002709 | XM_008358628 |
| PCP002752 | 6,24164954  | 5,544423562 | 5,798828178 | 3,874796966 |           |              |
| PCP002771 | 4,369466484 | 4,222650022 | 5,403608584 | 5,824513297 | PCP002771 | XM_018650289 |
| PCP002793 | 6,03716255  | 6,47037417  | 6,426264755 | 7,037052702 |           |              |
| PCP002802 | 6,828707735 | 6,794415866 | 6,87036472  | 6,254178286 | PCP002802 | XM_009357952 |
| PCP002806 | 6,624539604 | 6,574858391 | 6,497133304 | 6,06608919  | PCP002806 | XM_018647437 |
| PCP002819 | 6,523561956 | 6,648609245 | 6,902917719 | 7,186559982 | PCP002819 | XM_009344515 |
| PCP002833 | 5,073391816 | 4,906890596 | 5,491853096 | 6,247927513 | PCP002833 | XM_009343223 |
| PCP002841 | 6,539158811 | 6,38663853  | 6,718772592 | 7,125878364 | PCP002841 | XM_009337643 |
| PCP002857 | 6,369291982 | 5,961854808 | 5,866166169 | 5,369117459 | PCP002857 | XM_009335975 |
| PCP002865 | 5,874551087 | 6,222456826 | 5,614709844 | 4,604664415 |           |              |
| PCP002875 | 6,554588852 | 6,54951516  | 5,48123435  | 5,513174885 | PCP002875 | XM_018650824 |
| PCP002905 | 5,746043983 | 5,415150205 | 4,523561956 | 3,169925001 | PCP002905 | XM_018651546 |
| PCP002908 | 6,942514505 | 6,686500527 | 6,906890596 | 6,491853096 | PCP002908 | XR_001791436 |
| PCP002910 | 6,528727582 | 6,705010253 | 6,938638658 | 6,491853096 |           |              |
| PCP002931 | 7,400879436 | 7,186559982 | 6,777025123 | 4,890933022 | PCP002931 | XM_009378477 |
| PCP003006 | 5,700439718 | 5,448570626 | 5,285402219 | 4,790250739 |           |              |
| PCP003025 | 5,142821844 | 5,426264755 | 5,882643049 | 4,34553831  | PCP003025 | XM_009370219 |
| PCP003027 | 5,369117459 | 5,882643049 | 5,849749117 | 6,486553493 |           |              |
| PCP003151 | 6,327866971 | 5,781359714 | 5,345893086 | 4,222650022 | PCP003151 | XM_009363495 |
| PCP003185 | 6,946379968 | 7,018700931 | 7,115511897 | 6,260590275 | PCP003185 | XM_008386843 |
| PCP003222 | 5,333781501 | 6,058965822 | 5,448570626 | 5,014801602 | PCP003222 | XM_008363041 |
| PCP003237 | 5,369117459 | 4,922673593 | 5,297558281 | 4,624685811 | PCP003237 | XM_018651512 |
| PCP003293 | 6,06608919  | 5,849749117 | 6,327866971 | 5,614709844 | PCP003293 | XM_008391312 |
| PCP003311 | 6,260590275 | 6,574858391 | 6,741466986 | 6,996275749 | PCP003311 | XM_009362099 |
| PCP003312 | 6,667750232 | 6,31596467  | 6,785681319 | 7,139551352 |           |              |
| PCP003339 | 5,333781501 | 5,807354922 | 6,087462841 | 6,189824559 | PCP003339 | XM_009362215 |
| PCP003341 | 7,090959258 | 6,62935662  | 6,414981143 | 6           |           |              |
| PCP003365 | 6,777025123 | 6,828707735 | 6,403778984 | 5,169925001 |           |              |
| PCP003373 | 6,420718183 | 5,709566354 | 5,946496941 | 5,849749117 | PCP003373 | XM_009376412 |
| PCP003397 | 4,890933022 | 5,321928095 | 4,544114402 | 4,029452886 | PCP003397 | XM_008389543 |
| PCP003402 | 5,345893086 | 5,333781501 | 6,72342204  | 8,110248388 |           |              |
| PCP003418 | 6,559644763 | 5,906890596 | 5,426264755 | 6,442943496 | PCP003418 | XM_009361276 |
| PCP003430 | 7,018700931 | 6,539158811 | 6,662917555 | 6,705010253 | PCP003430 | XM_009369095 |
| PCP003461 | 5,930737338 | 6,594996337 | 6,890811455 | 7,437377568 | PCP003461 | XM_009369144 |
| PCP003462 | 6,176522247 | 6,176522247 | 7,026025399 | 7,094552786 | PCP003462 | XM_009369145 |
| PCP003470 | 6,080444483 | 6,058965822 | 6,203005338 | 5,333781501 |           |              |
| PCP003475 | 5,64385619  | 5,554588852 | 5,48123435  | 4,772413555 | PCP003475 | XM_009376835 |

|           |             |             |             |             |           |              |
|-----------|-------------|-------------|-------------|-------------|-----------|--------------|
| PCP003478 | 5,807354922 | 5,309976492 | 5,437294331 | 4,222650022 | PCP003478 | XM_009378939 |
| PCP003499 | 6,894817763 | 6,700439718 | 6,589913261 | 6,481072857 | PCP003499 | XM_009378911 |
| PCP003511 | 6,569855608 | 6,798698597 | 6,448405435 | 6,47037417  |           |              |
| PCP003649 | 6,058965822 | 6,420718183 | 6,559644763 | 7,315874125 | PCP003649 | XM_009373744 |
| PCP003650 | 6,303780748 | 6,518377768 | 6,745909573 | 7,062531903 | PCP003650 | XM_009373748 |
| PCP003676 | 6,015024705 | 6,272956308 | 6,442943496 | 7,453929061 |           |              |
| PCP003679 | 6,420718183 | 7,30679083  | 6,574858391 | 6,930737338 | PCP003679 | XM_009347215 |
| PCP003740 | 5,297558281 | 4,392317423 | 4,95419631  | 3,700439718 | PCP003740 | XM_009350469 |
| PCP003772 | 6,559644763 | 6,777025123 | 6,732404887 | 6,442943496 | PCP003772 | XM_009347011 |
| PCP003786 | 7,026025399 | 6,862079387 | 6,958030641 | 5,930737338 | PCP003786 | XM_009368794 |
| PCP003789 | 5,380937195 | 5,824513297 | 6,176522247 | 6,609843592 | PCP003789 | XM_008361041 |
| PCP003836 | 6,235152624 | 6,426264755 | 6,309794644 | 7,040782866 | PCP003836 | XM_009363653 |
| PCP003838 | 6,176522247 | 5,961854808 | 6,380764075 | 6,732404887 | PCP003838 | XM_009363654 |
| PCP003848 | 6,403778984 | 6,442943496 | 6,513016928 | 6,044394119 | PCP003848 | XM_008366514 |
| PCP003869 | 6,222456826 | 6,309794644 | 6,454011343 | 7,007531912 | PCP003869 | XM_009367429 |
| PCP003894 | 6,958030641 | 6,528727582 | 6,209453366 | 4,922673593 |           |              |
| PCP003897 | 4,480911346 | 5,57500972  | 4,938756261 | 6,044394119 | PCP003897 | XM_009366844 |
| PCP003989 | 6,339850003 | 5,789990019 | 5,866166169 | 5,789990019 | PCP003989 | XM_009371046 |
| PCP003997 | 6,357552005 | 6,169925001 | 6,464831606 | 7,033423002 | PCP003997 | XM_009371069 |
| PCP004090 | 5,459431619 | 5,736875423 | 5,60496087  | 5,014801602 | PCP004090 | XM_018645966 |
| PCP004102 | 6,714245518 | 6,044394119 | 6,918863237 | 6,837060204 |           |              |
| PCP004106 | 6,658211483 | 6,414981143 | 6,513016928 | 5,709566354 | PCP004106 | XM_009370239 |
| PCP004114 | 6,279285561 | 6,247927513 | 5,849749117 | 5,533874777 | PCP004114 | XM_009376322 |
| PCP004115 | 6,426264755 | 6,50779464  | 6,426264755 | 5,992541859 | PCP004115 | XM_009376320 |
| PCP004153 | 5,058749412 | 5,746043983 | 6,129283017 | 6,183288001 | PCP004153 | XM_009366733 |
| PCP004172 | 6,705010253 | 5,914803677 | 6,459431619 | 6,981053471 | PCP004172 | XM_009356453 |
| PCP004203 | 5,448570626 | 5,824513297 | 6,222456826 | 6,841344192 | PCP004203 | XM_008344440 |
| PCP004206 | 6,820178962 | 6,62935662  | 5,961854808 | 5,273142859 | PCP004206 | XM_009355920 |
| PCP004210 | 6,763809907 | 6,619559738 | 6,62935662  | 6,115407855 | PCP004210 | XM_018647005 |
| PCP004215 | 6,101608059 | 6,189824559 | 6,189824559 | 5,235344128 | PCP004215 | XM_009355933 |
| PCP004272 | 6,291493053 | 6,094447222 | 6,203005338 | 5,357552005 | PCP004272 | XM_009375832 |
| PCP004304 | 6,380764075 | 6,203005338 | 6,579994693 | 6,101608059 | PCP004304 | XM_008344062 |
| PCP004311 | 4,459431619 | 3,663344619 | 4,087462841 | 6,837060204 | PCP004311 | XM_009341828 |
| PCP004327 | 5,798828178 | 5,470211457 | 5,502394256 | 4,544114402 | PCP004327 | XM_009373142 |
| PCP004333 | 6,357552005 | 6,50255338  | 5,984817174 | 5,922911406 | PCP004333 | XM_009373127 |
| PCP004334 | 7,22881869  | 6,47037417  | 6,737010678 | 6,215872703 | PCP004334 | XM_017330527 |
| PCP004346 | 5,672425342 | 5,984817174 | 5,169925001 | 5,491853096 | PCP004346 | XM_008382241 |
| PCP004357 | 6,409390936 | 5,437294331 | 6,272956308 | 5,977279923 |           |              |
| PCP004358 | 5,115615931 | 5,357552005 | 5,60496087  | 6,215872703 | PCP004358 | XM_008370675 |
| PCP004369 | 6,409390936 | 5,781359714 | 5,491853096 | 5,058749412 |           |              |
| PCP004451 | 4,604664415 | 4,790250739 | 5,554588852 | 6,619559738 | PCP004451 | XM_008347000 |
| PCP004464 | 5,969703088 | 6,914923239 | 6,942514505 | 6,910852562 | PCP004464 | XM_009376766 |
| PCP004528 | 5,142821844 | 6,426264755 | 5,866166169 | 4,754887502 |           |              |
| PCP004569 | 4,824258697 | 4,857980995 | 4,938756261 | 6,624539604 | PCP004569 | XM_009366988 |
| PCP004598 | 6,481072857 | 6,454011343 | 6,634157606 | 7,215969746 | PCP004598 | XM_009351172 |
| PCP004622 | 4,059182199 | 6           | 5,961854808 | 4,196134881 | PCP004622 | XM_008359674 |

|           |             |             |             |             |           |              |
|-----------|-------------|-------------|-------------|-------------|-----------|--------------|
| PCP004639 | 5,798828178 | 5,57500972  | 5,437294331 | 5,183089461 | PCP004639 | XM_018645158 |
| PCP004651 | 4,857980995 | 4,321928095 | 5,437294331 | 4,087462841 | PCP004651 | XM_008391856 |
| PCP004678 | 6,902917719 | 6,95419631  | 6,614709844 | 6,639087423 |           |              |
| PCP004689 | 6,95419631  | 6,569855608 | 6,759289016 | 6,68187088  | PCP004689 | XM_008384807 |
| PCP004738 | 6,554588852 | 6,584962501 | 6,763809907 | 6,254178286 | PCP004738 | XM_018647237 |
| PCP004748 | 6,87036472  | 6,321928095 | 5,672425342 | 5,02989455  | PCP004748 | XM_009374004 |
| PCP004768 | 5,824513297 | 5,115615931 | 5,746043983 | 4,824258697 | PCP004768 | XM_018644055 |
| PCP004772 | 5,459431619 | 4,857980995 | 4,938756261 | 4,584962501 | PCP004772 | XM_017325187 |
| PCP004776 | 5,513174885 | 5,857980995 | 6,824386003 | 7,938579853 | PCP004776 | XM_009348478 |
| PCP004842 | 6,754887502 | 6,420718183 | 6,777025123 | 6,06608919  | PCP004842 | XM_018651285 |
| PCP004846 | 5,115615931 | 4,857980995 | 4,700439718 | 4           | PCP004846 | XM_008347637 |
| PCP004874 | 5,807354922 | 4,392317423 | 3,584962501 | 5,426264755 | PCP004874 | XM_009373739 |
| PCP004900 | 6,737010678 | 6,454011343 | 6,327866971 | 6,297741678 | PCP004900 | XM_009361004 |
| PCP004915 | 5,014801602 | 5,564683017 | 6,058965822 | 5,523561956 | PCP004915 | XM_009356579 |
| PCP004957 | 6,189824559 | 6,101608059 | 5,969703088 | 5,554588852 | PCP004957 | NM_001302294 |
| PCP004991 | 6,156437068 | 6,260590275 | 6,459431619 | 6,981053471 | PCP004991 | XM_008345811 |
| PCP005012 | 4,790250739 | 5,235344128 | 5,156639311 | 5,961854808 |           |              |
| PCP005035 | 6,589913261 | 6,363346321 | 6,22881869  | 5,977279923 | PCP005035 | XM_009363354 |
| PCP005066 | 5,961854808 | 5,59484709  | 5,415150205 | 4,922673593 |           |              |
| PCP005117 | 6,934634441 | 6,86628983  | 6,333960351 | 6,922792504 | PCP005117 | XM_009360370 |
| PCP005141 | 7,30679083  | 7,026025399 | 6,589913261 | 5,781359714 | PCP005141 | XM_009369418 |
| PCP005142 | 6,297741678 | 6,60481265  | 6,705010253 | 7,363433935 | PCP005142 | XM_009369420 |
| PCP005190 | 5,857980995 | 5,59484709  | 5,866166169 | 6,599912842 | PCP005190 | XM_018650258 |
| PCP005202 | 6,750472519 | 6,653490009 | 6,420718183 | 6,303780748 |           |              |
| PCP005204 | 6,272956308 | 6,363346321 | 6,122465658 | 6,815959618 | PCP005204 | XM_008358409 |
| PCP005219 | 6,459431619 | 6,094447222 | 6,380764075 | 6,938638658 | PCP005219 | XM_008376356 |
| PCP005226 | 7,06608919  | 6,841344192 | 6,727920455 | 6,763809907 | PCP005226 | XM_009340843 |
| PCP005233 | 6,363346321 | 6,534030467 | 6,815959618 | 7,403693786 |           |              |
| PCP005239 | 6,345715709 | 6,845490051 | 6,745909573 | 7,348728154 | PCP005239 | XM_009353433 |
| PCP005244 | 6,54426899  | 5,824513297 | 6,677085351 | 6,50779464  | PCP005244 | XM_008342230 |
| PCP005259 | 6,906890596 | 6,898812977 | 6,589913261 | 6,357552005 | PCP005259 | XM_018646464 |
| PCP005278 | 6,481072857 | 6,513016928 | 6,285402219 | 5,882643049 | PCP005278 | XM_009380215 |
| PCP005280 | 6,247927513 | 5,992541859 | 6,72342204  | 7,129283017 | PCP005280 | XM_009380218 |
| PCP005325 | 6,910852562 | 6,961970533 | 6,50779464  | 5,321928095 | PCP005325 | XM_009369266 |
| PCP005371 | 6,80309785  | 6,772545519 | 7,442943496 | 6,426264755 | PCP005371 | XM_009380179 |
| PCP005413 | 6,044394119 | 5,437294331 | 5,222263604 | 4,392317423 |           |              |
| PCP005424 | 4,890933022 | 5,584962501 | 6,101608059 | 10,18818083 | PCP005424 | XM_009357891 |
| PCP005447 | 5,992541859 | 6,196331634 | 5,653346693 | 5,209453366 | PCP005447 | XM_018652102 |
| PCP005455 | 6,763809907 | 6,409390936 | 6,653490009 | 6,321928095 |           |              |
| PCP005525 | 5,832890014 | 5,807354922 | 6,101608059 | 5,183089461 |           |              |
| PCP005533 | 5,857980995 | 6           | 6,528727582 | 5,691254979 | PCP005533 | XM_009375460 |
| PCP005539 | 4,985044962 | 4,584962501 | 5,357552005 | 5,866166169 | PCP005539 | XM_009375464 |
| PCP005553 | 5,969703088 | 5,789990019 | 6,051589621 | 5,513174885 | PCP005553 | XM_008365851 |
| PCP005588 | 6,481072857 | 6,539158811 | 6,235152624 | 6,209453366 | PCP005588 | XM_009357298 |
| PCP005592 | 0,739848103 | 5,746043983 | 7,745976779 | 11,87203226 | PCP005592 | XM_008364028 |
| PCP005594 | 0           | 5,763677142 | 6,03716255  | 7,139551352 | PCP005594 | XM_008372022 |

|           |             |             |             |             |           |              |
|-----------|-------------|-------------|-------------|-------------|-----------|--------------|
| PCP005602 | 6,203005338 | 6,266786541 | 6,50255338  | 5,95419631  |           |              |
| PCP005603 | 6,309794644 | 6,07317756  | 5,961854808 | 6,80309785  | PCP005603 | XM_009378153 |
| PCP005613 | 4,297925053 | 4,790250739 | 5,087462841 | 5,672425342 | PCP005613 | XM_009352209 |
| PCP005629 | 6,38663853  | 6,86628983  | 6,977279923 | 7,118941073 | PCP005629 | XR_524428    |
| PCP005639 | 5,470211457 | 5,64385619  | 4,718635616 | 4,437627248 | PCP005639 | XM_008366510 |
| PCP005647 | 5,77267747  | 5,491853096 | 5,459431619 | 5,222263604 | PCP005647 | XM_009338170 |
| PCP005667 | 6,254178286 | 6,297741678 | 6,807354922 | 6,946379968 | PCP005667 | XM_009340274 |
| PCP005688 | 6,709704193 | 6,594996337 | 6,497133304 | 6,169925001 | PCP005688 | XM_009346840 |
| PCP005697 | 5,841218374 | 6,481072857 | 6,579994693 | 6,862079387 |           |              |
| PCP005700 | 6,513016928 | 6,54426899  | 6,64385619  | 7,351645995 | PCP005700 | XM_009352107 |
| PCP005701 | 4,700439718 | 4,790250739 | 5,866166169 | 6           | PCP005701 | XM_008365769 |
| PCP005714 | 4,544114402 | 4,906890596 | 4,824258697 | 5,672425342 |           |              |
| PCP005755 | 6,291493053 | 6,297741678 | 6,695854658 | 7,354646096 | PCP005755 | XM_009357844 |
| PCP005775 | 6,639087423 | 6,539158811 | 6,584962501 | 6,351734323 |           |              |
| PCP005852 | 4,841469999 | 4,604664415 | 3,938285792 | 8,336863563 | PCP005852 | XM_009361807 |
| PCP005859 | 4,969472865 | 5,459431619 | 5,681730355 | 4,700439718 | PCP005859 | XM_009361732 |
| PCP005870 | 6,420718183 | 6,403778984 | 6,50255338  | 7,494495616 |           |              |
| PCP005875 | 4,906890596 | 5,459431619 | 5,727920455 | 6,291493053 | PCP005875 | XM_018645256 |
| PCP005959 | 6,266786541 | 6,60481265  | 6,72342204  | 7,377904593 |           |              |
| PCP006002 | 4,969472865 | 5,115615931 | 5,183089461 | 6,129283017 | PCP006002 | XM_009360003 |
| PCP006055 | 5,273142859 | 4,662775172 | 5,014801602 | 4,272769732 | PCP006055 | XM_009344984 |
| PCP006069 | 6,169925001 | 6,31596467  | 6,662917555 | 7,315874125 | PCP006069 | XM_009379361 |
| PCP006078 | 6,007419784 | 6,183288001 | 6,22881869  | 5,523561956 |           |              |
| PCP006080 | 5,938521046 | 5,614709844 | 5,672425342 | 5,403608584 | PCP006080 | XM_009363127 |
| PCP006140 | 6,426264755 | 6,285402219 | 6,215872703 | 5,849749117 | PCP006140 | XM_009362615 |
| PCP006206 | 3,058316496 | 3,368768349 | 4,95419631  | 6,54426899  | PCP006206 | XM_009363908 |
| PCP006220 | 5,48123435  | 5,57500972  | 6,143026004 | 6,695854658 | PCP006220 | XM_009347604 |
| PCP006280 | 5,115615931 | 5,142821844 | 5,169925001 | 4,297925053 | PCP006280 | XM_008361819 |
| PCP006293 | 5,663059924 | 6,029673735 | 5,533874777 | 5,357552005 | PCP006293 | XM_009379661 |
| PCP006306 | 5,523561956 | 5,584962501 | 5,196528361 | 4,906890596 | PCP006306 | XM_009364936 |
| PCP006322 | 6,619559738 | 6,06608919  | 5,922911406 | 5,992541859 | PCP006322 | XM_009347655 |
| PCP006327 | 6,215872703 | 6,584962501 | 6,824386003 | 6,902917719 |           |              |
| PCP006361 | 5,156639311 | 5,727920455 | 5,746043983 | 7,544346278 |           |              |
| PCP006364 | 6,169925001 | 6,06608919  | 6,169925001 | 5,700439718 | PCP006364 | XM_009379453 |
| PCP006385 | 6,759289016 | 6,81159947  | 5,544423562 | 5,02989455  |           |              |
| PCP006393 | 5,77267747  | 5,073391816 | 5,260402093 | 3,840966704 |           |              |
| PCP006398 | 7,047996356 | 6,266786541 | 6,266786541 | 5,624393382 | PCP006398 | XM_018648044 |
| PCP006414 | 6,853870927 | 6,745909573 | 6,554588852 | 6,486553493 | PCP006414 | XM_017331704 |
| PCP006449 | 4,624685811 | 4,544114402 | 4,807354922 | 6,122465658 | PCP006449 | XM_009362257 |
| PCP006452 | 7,279192684 | 6,781359714 | 5,824513297 | 6,285402219 | PCP006452 | XR_668246    |
| PCP006535 | 6,108524457 | 5,718909554 | 6,087462841 | 6,820178962 | PCP006535 | XM_018645288 |
| PCP006550 | 6,015024705 | 5,95419631  | 5,727920455 | 5,415150205 |           |              |
| PCP006556 | 4,523561956 | 4,874305166 | 5,087462841 | 5,736875423 | PCP006556 | XM_009367719 |
| PCP006571 | 5,044394119 | 4,824258697 | 5,789990019 | 4,624685811 | PCP006571 | XM_009372582 |
| PCP006591 | 7,033423002 | 6,534030467 | 6,594996337 | 6,189824559 | PCP006591 | XM_009372642 |
| PCP006605 | 5,333781501 | 4,969472865 | 6,044394119 | 5,754887502 | PCP006605 | XM_008357515 |

|           |             |             |             |             |           |              |
|-----------|-------------|-------------|-------------|-------------|-----------|--------------|
| PCP006607 | 6,176522247 | 6,574858391 | 6,54951516  | 6,894817763 | PCP006607 | XM_008372042 |
| PCP006633 | 5,044394119 | 5,554588852 | 5,798828178 | 5,087462841 |           |              |
| PCP006655 | 6,209453366 | 6,14974712  | 6,357552005 | 7,28845085  | PCP006655 | XM_008366387 |
| PCP006661 | 5,309976492 | 5,459431619 | 4,95419631  | 4           | PCP006661 | XM_008376221 |
| PCP006679 | 6,058965822 | 6,321928095 | 6,497133304 | 6,832890014 | PCP006679 | XM_008241508 |
| PCP006692 | 4,059182199 | 4,272769732 | 4,922673593 | 6,163297449 | PCP006692 | XM_009340897 |
| PCP006696 | 6,513016928 | 6,189824559 | 6,486553493 | 7,17990909  | PCP006696 | XM_009341010 |
| PCP006714 | 5,961854808 | 5,653346693 | 5,824513297 | 7,453929061 | PCP006714 | XM_017322560 |
| PCP006726 | 6,080444483 | 6,80309785  | 6,695854658 | 6,122465658 |           |              |
| PCP006741 | 6,203005338 | 6,321928095 | 6,574858391 | 6,906890596 | PCP006741 | XM_018650276 |
| PCP006748 | 5,357552005 | 5,415150205 | 5,392317423 | 4,34553831  |           |              |
| PCP006759 | 6,07317756  | 6,14974712  | 6,285402219 | 6,95419631  |           |              |
| PCP006774 | 5,285402219 | 4,922673593 | 4,938756261 | 6,497133304 | PCP006774 | XM_009353317 |
| PCP006780 | 4,523561956 | 4,906890596 | 5,866166169 | 6,634157606 | PCP006780 | XM_009353302 |
| PCP006791 | 6,718772592 | 5,961854808 | 4,874305166 | 4,772413555 | PCP006791 | XM_009353284 |
| PCP006804 | 5,59484709  | 5,906890596 | 6,285402219 | 6,781359714 | PCP006804 | XM_009353252 |
| PCP006806 | 6,272956308 | 5,815831566 | 5,824513297 | 5,115615931 | PCP006806 | XM_009353257 |
| PCP006823 | 6,297741678 | 6,380764075 | 6,639087423 | 7,108524457 | PCP006823 | XM_017329836 |
| PCP006832 | 6,297741678 | 5,513174885 | 6,247927513 | 5,874551087 | PCP006832 | XM_008345260 |
| PCP006861 | 5,470211457 | 5,437294331 | 5,914803677 | 6,459431619 |           |              |
| PCP006878 | 5,984817174 | 5,564683017 | 5,415150205 | 4,890933022 | PCP006878 | XM_008379985 |
| PCP006897 | 6,38663853  | 6,491853096 | 6,22881869  | 7,073284692 | PCP006897 | XM_009355158 |
| PCP006914 | 5,235344128 | 5,345893086 | 6,420718183 | 5,554588852 | PCP006914 | XM_008373685 |
| PCP006931 | 4,73714592  | 4,73714592  | 5,415150205 | 6,54951516  | PCP006931 | XM_008373663 |
| PCP006934 | 6,569855608 | 6,420718183 | 6,824386003 | 7,156538193 |           |              |
| PCP006952 | 6,169925001 | 6,732404887 | 6,777025123 | 6,115407855 | PCP006952 | XM_008379151 |
| PCP006965 | 6,594996337 | 6,380764075 | 6,327866971 | 7,040782866 |           |              |
| PCP006972 | 6,007419784 | 5,513174885 | 5,57500972  | 5,169925001 | PCP006972 | XM_008369271 |
| PCP006974 | 6,984931073 | 6,339850003 | 6,215872703 | 6,662917555 | PCP006974 | XM_009352898 |
| PCP006981 | 6,058965822 | 5,718909554 | 5,700439718 | 5,380937195 | PCP006981 | XM_009352941 |
| PCP006990 | 6,890811455 | 6,926829678 | 6,898812977 | 6,574858391 | PCP006990 | XM_009363035 |
| PCP007007 | 6,345715709 | 5,624393382 | 6,058965822 | 5,77267747  |           |              |
| PCP007016 | 6,874428132 | 6,38663853  | 6,47037417  | 6,235152624 | PCP007016 | XM_009355881 |
| PCP007034 | 5,392317423 | 5,156639311 | 4,857980995 | 4,459431619 | PCP007034 | XM_009340968 |
| PCP007047 | 6,029673735 | 5,857980995 | 6,044394119 | 6,737010678 | PCP007047 | XM_008377284 |
| PCP007048 | 5,727920455 | 5,142821844 | 4,969472865 | 3,938285792 | PCP007048 | XM_009340246 |
| PCP007090 | 6,136068312 | 6,345715709 | 6,486553493 | 7,011227255 | PCP007090 | XM_009360532 |
| PCP007091 | 6,750472519 | 6,163297449 | 6,594996337 | 6,327866971 | PCP007091 | XM_009360529 |
| PCP007096 | 5,634302842 | 5,333781501 | 4,857980995 | 4,584962501 | PCP007096 | XM_008361547 |
| PCP007114 | 6,926829678 | 6,95419631  | 6,392317423 | 6,614709844 | PCP007114 | XM_009343168 |
| PCP007123 | 5,798828178 | 6,235152624 | 6,634157606 | 7,366322214 | PCP007123 | XM_009354965 |
| PCP007148 | 6,279285561 | 6,564835417 | 6,777025123 | 7,159871337 | PCP007148 | XR_001951932 |
| PCP007151 | 4,662775172 | 5,183089461 | 6,07317756  | 7,50517639  |           |              |
| PCP007156 | 6,718772592 | 6,574858391 | 6,554588852 | 5,841218374 | PCP007156 | XM_008344754 |
| PCP007173 | 4,662775172 | 4,247927513 | 5,183089461 | 5,992541859 | PCP007173 | XM_009354462 |
| PCP007181 | 5,874551087 | 5,115615931 | 6,136068312 | 6,513016928 | PCP007181 | XM_009354479 |

|           |             |             |             |             |           |              |
|-----------|-------------|-------------|-------------|-------------|-----------|--------------|
| PCP007201 | 5,380937195 | 5,564683017 | 5,403608584 | 4,95419631  |           |              |
| PCP007216 | 6,351734323 | 6,648609245 | 6,54951516  | 7,564759219 |           |              |
| PCP007222 | 6,759289016 | 6,579994693 | 6,62935662  | 5,564683017 | PCP007222 | XM_009359499 |
| PCP007326 | 6,260590275 | 6,209453366 | 6,898812977 | 6,969587981 | PCP007326 | XM_009374613 |
| PCP007354 | 6,794415866 | 6,4374608   | 6,634157606 | 6,491853096 | PCP007354 | XM_009348416 |
| PCP007376 | 6,260590275 | 6,392317423 | 6,589913261 | 6,163297449 | PCP007376 | XM_009354931 |
| PCP007419 | 4,906890596 | 5,672425342 | 6,686500527 | 6,700439718 | PCP007419 | XM_009337422 |
| PCP007440 | 5,380937195 | 5,77267747  | 5,663059924 | 5,115615931 | PCP007440 | XM_009343038 |
| PCP007456 | 5,48123435  | 5,533874777 | 4,841469999 | 4,247927513 | PCP007456 | XM_008340005 |
| PCP007489 | 6,03716255  | 5,77267747  | 5,614709844 | 5,309976492 | PCP007489 | XM_009376585 |
| PCP007500 | 6,115407855 | 6,609843592 | 6,559644763 | 7,206232954 | PCP007500 | XR_666723    |
| PCP007501 | 6,129283017 | 6,209453366 | 6,539158811 | 7,14974712  | PCP007501 | XR_524153    |
| PCP007509 | 5,369117459 | 6,297741678 | 5,285402219 | 7,662988741 | PCP007509 | XM_009360014 |
| PCP007510 | 6,539158811 | 6,235152624 | 5,77267747  | 5,115615931 |           |              |
| PCP007537 | 6,176522247 | 5,882643049 | 6,414981143 | 6,68187088  | PCP007537 | XM_009354656 |
| PCP007545 | 6,235152624 | 6,741466986 | 5,890689878 | 4,985044962 | PCP007545 | XM_008349395 |
| PCP007548 | 5,014801602 | 4,564987801 | 5,841218374 | 5,554588852 | PCP007548 | XM_018649814 |
| PCP007574 | 7,069637728 | 6,624539604 | 6,996275749 | 6,727920455 | PCP007574 | XM_018652394 |
| PCP007579 | 5,403608584 | 5,624393382 | 5,333781501 | 4           | PCP007579 | XM_018643221 |
| PCP007591 | 6,50255338  | 6,653490009 | 6,658211483 | 6,397974049 |           |              |
| PCP007603 | 6,266786541 | 6,686500527 | 6,750472519 | 7,315874125 |           |              |
| PCP007628 | 5,437294331 | 5,073391816 | 4,321928095 | 4,297925053 | PCP007628 | XM_018644417 |
| PCP007634 | 6,958030641 | 6,431790083 | 6,321928095 | 5,95419631  | PCP007634 | XM_009369037 |
| PCP007636 | 4,087462841 | 4,523561956 | 6,414981143 | 5,841218374 | PCP007636 | XM_008358141 |
| PCP007675 | 7,17990909  | 7,209453366 | 6,754887502 | 6,222456826 | PCP007675 | XM_017337082 |
| PCP007702 | 5           | 5,614709844 | 5,321928095 | 6,07317756  |           |              |
| PCP007720 | 5,634302842 | 5,073391816 | 5,807354922 | 5,129283017 | PCP007720 | XM_008380107 |
| PCP007763 | 6,409390936 | 6,339850003 | 6,68187088  | 7,069637728 | PCP007763 | XM_009349923 |
| PCP007784 | 6,183288001 | 5,672425342 | 6,183288001 | 5,736875423 |           |              |
| PCP007785 | 5,544423562 | 6,143026004 | 6,380764075 | 6,624539604 | PCP007785 | XR_664479    |
| PCP007802 | 6,890811455 | 6,837060204 | 6,594996337 | 6,4374608   | PCP007802 | XM_009369485 |
| PCP007809 | 5,754887502 | 5,890689878 | 6,737010678 | 7,011227255 | PCP007809 | XM_017331588 |
| PCP007815 | 6,807354922 | 6,81159947  | 6,397974049 | 6,481072857 | PCP007815 | XM_008380258 |
| PCP007825 | 6,022367813 | 5,169925001 | 5,533874777 | 5,653346693 | PCP007825 | XM_008369714 |
| PCP007827 | 5,57500972  | 5,653346693 | 5,807354922 | 6,700439718 |           |              |
| PCP007828 | 6,321928095 | 6,497133304 | 6,420718183 | 6,14974712  | PCP007828 | XM_008345759 |
| PCP007836 | 5,209453366 | 4,624685811 | 4,502712486 | 4,196134881 | PCP007836 | XM_008376986 |
| PCP007841 | 5,992541859 | 5,857980995 | 6,101608059 | 5,235344128 |           |              |
| PCP007867 | 5,672425342 | 5,523561956 | 5,736875423 | 4,922673593 | PCP007867 | XM_018644378 |
| PCP007870 | 3,624100895 | 5,502394256 | 4,906890596 | 4,321928095 |           |              |
| PCP007906 | 5,470211457 | 6,136068312 | 5,890689878 | 5,564683017 | PCP007906 | XM_009351141 |
| PCP007912 | 6,942514505 | 6,169925001 | 6,357552005 | 6,62935662  | PCP007912 | XM_018643024 |
| PCP007917 | 6,84962403  | 6,695854658 | 6,420718183 | 6,321928095 | PCP007917 | XM_009340052 |
| PCP007997 | 4,662775172 | 5,222263604 | 5,415150205 | 5,798828178 | PCP007997 | XM_009336035 |
| PCP008007 | 5,653346693 | 5,969703088 | 6,094447222 | 5,513174885 | PCP008007 | XM_018650777 |
| PCP008012 | 6,50255338  | 6,448405435 | 6,691115365 | 7,677155841 |           |              |

|           |             |             |             |             |           |              |
|-----------|-------------|-------------|-------------|-------------|-----------|--------------|
| PCP008056 | 5,906890596 | 5,95419631  | 5,681730355 | 5,502394256 | PCP008056 | XM_008379949 |
| PCP008145 | 6,95419631  | 6,403778984 | 6,790120385 | 6,321928095 | PCP008145 | XM_009374468 |
| PCP008147 | 7,297649983 | 6,772545519 | 6,709704193 | 5,922911406 | PCP008147 | XM_018650563 |
| PCP008155 | 4,321928095 | 6,115407855 | 6,695854658 | 5,95419631  | PCP008155 | XM_009372357 |
| PCP008156 | 3,27351589  | 5,357552005 | 5,459431619 | 4,73714592  | PCP008156 | XM_009372356 |
| PCP008161 | 5,663059924 | 6,136068312 | 7,592457037 | 7,273049587 | PCP008161 | XM_009372352 |
| PCP008243 | 4,392317423 | 4,604664415 | 4,523561956 | 5,663059924 | PCP008243 | XM_008356700 |
| PCP008295 | 3,700439718 | 4,754887502 | 5,115615931 | 5,906890596 | PCP008295 | XM_008391486 |
| PCP008297 | 5,60496087  | 5,672425342 | 6,215872703 | 5,183089461 | PCP008297 | XM_008352714 |
| PCP008303 | 5           | 5,169925001 | 5,044394119 | 4,169925001 |           |              |
| PCP008307 | 6,599912842 | 6,215872703 | 5,57500972  | 5,426264755 | PCP008307 | XM_008391458 |
| PCP008323 | 5,60496087  | 5,60496087  | 5,95419631  | 6,634157606 |           |              |
| PCP008333 | 6,22881869  | 6,31596467  | 6,087462841 | 5,969703088 | PCP008333 | XM_017336994 |
| PCP008352 | 4,222650022 | 5,073391816 | 4,969472865 | 5,672425342 | PCP008352 | XM_017336701 |
| PCP008370 | 5,297558281 | 5,448570626 | 5,624393382 | 6,700439718 | PCP008370 | XM_009356592 |
| PCP008395 | 6,426264755 | 6,614709844 | 6,86628983  | 7,087462841 |           |              |
| PCP008428 | 5,459431619 | 5,789990019 | 6,584962501 | 6,634157606 | PCP008428 | XM_009335817 |
| PCP008432 | 6,431790083 | 6,351734323 | 6,022367813 | 5,59484709  | PCP008432 | XM_018642512 |
| PCP008440 | 3,700439718 | 5,115615931 | 6,497133304 | 7,969645536 |           |              |
| PCP008507 | 6,768184325 | 6,189824559 | 6,369291982 | 5,403608584 | PCP008507 | XM_008393481 |
| PCP008511 | 5,415150205 | 5,663059924 | 5,922911406 | 6,594996337 | PCP008511 | XM_009348572 |
| PCP008527 | 4,857980995 | 5,77267747  | 5,841218374 | 6,691115365 | PCP008527 | XM_008352440 |
| PCP008528 | 4,564987801 | 3,736604875 | 4,807354922 | 5,209453366 | PCP008528 | XM_018642343 |
| PCP008538 | 7,189824559 | 6,481072857 | 5,426264755 | 5,564683017 | PCP008538 | XM_018642330 |
| PCP008553 | 6,115407855 | 6,163297449 | 6,798698597 | 5,938521046 | PCP008553 | XM_009339388 |
| PCP008559 | 4,115199749 | 4,662775172 | 3,700439718 | 6,667750232 | PCP008559 | XM_008358934 |
| PCP008587 | 4,392317423 | 4,059182199 | 4,718635616 | 5,691254979 | PCP008587 | XM_009360986 |
| PCP008602 | 5,309976492 | 5,57500972  | 4,890933022 | 5,890689878 |           |              |
| PCP008634 | 4,087462841 | 4,790250739 | 5,754887502 | 5,392317423 | PCP008634 | XM_008221236 |
| PCP008641 | 5,491853096 | 5,209453366 | 5,938521046 | 6,72342204  |           |              |
| PCP008646 | 6,442943496 | 6,392317423 | 6,584962501 | 7,183188734 |           |              |
| PCP008712 | 6,209453366 | 6,022367813 | 6,898812977 | 7,122362117 | PCP008712 | XM_009363626 |
| PCP008716 | 6,894817763 | 6,824386003 | 6,741466986 | 6,539158811 | PCP008716 | XR_001953539 |
| PCP008720 | 6,38663853  | 6,189824559 | 5,663059924 | 6,414981143 | PCP008720 | XM_018648640 |
| PCP008721 | 4,824258697 | 5,142821844 | 6,303780748 | 5,789990019 | PCP008721 | XM_018648641 |
| PCP008722 | 6,539158811 | 5,247927513 | 6,569855608 | 5,491853096 | PCP008722 | XM_009363638 |
| PCP008750 | 6,777025123 | 6,837060204 | 6,785681319 | 6,50255338  |           |              |
| PCP008767 | 6,454011343 | 6,569855608 | 6,60481265  | 7,321928095 | PCP008767 | XM_009357637 |
| PCP008776 | 6,589913261 | 6,215872703 | 6,129283017 | 6,03716255  | PCP008776 | XM_009359083 |
| PCP008831 | 4,437627248 | 5,014801602 | 6,209453366 | 8,993419626 | PCP008831 | XM_008395519 |
| PCP008838 | 6,015024705 | 5,634302842 | 6,156437068 | 5,491853096 | PCP008838 | XM_018648395 |
| PCP008864 | 5,222263604 | 6,22881869  | 5,672425342 | 5,614709844 | PCP008864 | XM_009355636 |
| PCP008897 | 6,196331634 | 5,95419631  | 5,700439718 | 5,754887502 | PCP008897 | XM_009347544 |
| PCP008900 | 6,22881869  | 6,518377768 | 6,820178962 | 6,946379968 | PCP008900 | XM_009347545 |
| PCP008912 | 6,97349648  | 6,942514505 | 6,285402219 | 6,260590275 | PCP008912 | XM_009345310 |
| PCP008915 | 6,894817763 | 6,857980995 | 6,828707735 | 6,247927513 | PCP008915 | XM_009336198 |

|           |             |             |             |             |           |              |
|-----------|-------------|-------------|-------------|-------------|-----------|--------------|
| PCP008916 | 5,044394119 | 5,392317423 | 4,969472865 | 4,459431619 |           |              |
| PCP008954 | 6,700439718 | 6,156437068 | 6,686500527 | 6,375039431 | PCP008954 | XM_009346690 |
| PCP008956 | 6,279285561 | 5,544423562 | 4,985044962 | 4,584962501 | PCP008956 | XM_009344506 |
| PCP008968 | 5,857980995 | 5,681730355 | 7,451211112 | 6,491853096 | PCP008968 | XM_008370092 |
| PCP008976 | 6,442943496 | 6,922792504 | 6,857980995 | 6,672425342 |           |              |
| PCP009006 | 6,309794644 | 6,420718183 | 6,333960351 | 7,062531903 | PCP009006 | XM_017323213 |
| PCP009019 | 5,815831566 | 6,176522247 | 6,309794644 | 7,080337882 |           |              |
| PCP009027 | 7,372168569 | 7,08395793  | 6,820178962 | 6,058965822 |           |              |
| PCP009038 | 6,14974712  | 6,291493053 | 6,619559738 | 7,073284692 | PCP009038 | XM_008339162 |
| PCP009039 | 6,122465658 | 6,215872703 | 6,841344192 | 7,336908182 | PCP009039 | XM_009375745 |
| PCP009048 | 5,448570626 | 5,196528361 | 5,014801602 | 4,115199749 | PCP009048 | XM_018651325 |
| PCP009081 | 5,946496941 | 5,285402219 | 4,662775172 | 5,044394119 | PCP009081 | XM_008349113 |
| PCP009092 | 6,094447222 | 6,448405435 | 6,409390936 | 7,357552005 | PCP009092 | XM_009348700 |
| PCP009123 | 5,448570626 | 4,807354922 | 4,64385619  | 4,584962501 | PCP009123 | XM_009373235 |
| PCP009124 | 6,24164954  | 6,087462841 | 6,327866971 | 6,81159947  | PCP009124 | XM_009349296 |
| PCP009133 | 6,015024705 | 4,34553831  | 5,115615931 | 5,357552005 | PCP009133 | XM_009343558 |
| PCP009167 | 7,055282436 | 7,254272787 | 6,686500527 | 6,203005338 |           |              |
| PCP009177 | 4,906890596 | 4,841469999 | 5,247927513 | 5,938521046 |           |              |
| PCP009246 | 6,044394119 | 5,866166169 | 5,922911406 | 6,832890014 | PCP009246 | NM_001302309 |
| PCP009285 | 5,014801602 | 5,044394119 | 4,624685811 | 6           |           |              |
| PCP009299 | 5,584962501 | 5,345893086 | 4,922673593 | 4,480911346 | PCP009299 | XM_018649124 |
| PCP009373 | 6,518377768 | 6,189824559 | 6,327866971 | 5,763677142 | PCP009373 | XM_009373975 |
| PCP009409 | 6,03716255  | 5,624393382 | 6,475733431 | 6,14974712  | PCP009409 | XM_009365665 |
| PCP009411 | 6,624539604 | 6,297741678 | 6,599912842 | 7,062531903 | PCP009411 | XM_018649067 |
| PCP009428 | 4,34553831  | 4,662775172 | 5,196528361 | 5,564683017 | PCP009428 | XM_018643939 |
| PCP009429 | 5,614709844 | 5,874551087 | 6,345715709 | 5,554588852 | PCP009429 | XM_018651285 |
| PCP009441 | 5,554588852 | 4,754887502 | 4,523561956 | 4,169925001 | PCP009441 | XM_009366778 |
| PCP009482 | 6,235152624 | 6,143026004 | 6,087462841 | 5,459431619 | PCP009482 | XM_009365243 |
| PCP009501 | 4,392317423 | 5,260402093 | 5,448570626 | 5,906890596 | PCP009501 | XM_008388291 |
| PCP009538 | 6,559644763 | 6,357552005 | 6,574858391 | 6,215872703 | PCP009538 | XM_009354795 |
| PCP009578 | 5,380937195 | 5,584962501 | 6,235152624 | 6,459431619 |           |              |
| PCP009647 | 5,992541859 | 5,77267747  | 6,333960351 | 6,768184325 | PCP009647 | NM_001302282 |
| PCP009653 | 6,14974712  | 6,235152624 | 6,215872703 | 5,857980995 | PCP009653 | XM_008344777 |
| PCP009717 | 6,203005338 | 6,176522247 | 5,882643049 | 4,392317423 |           |              |
| PCP009725 | 6,122465658 | 5,523561956 | 5,718909554 | 5,491853096 | PCP009725 | XM_008341439 |
| PCP009750 | 5,718909554 | 5,914803677 | 5,448570626 | 5,209453366 | PCP009750 | XM_009358968 |
| PCP009759 | 7,156538193 | 6,272956308 | 6,4374608   | 5,824513297 | PCP009759 | XM_009359012 |
| PCP009782 | 5,922911406 | 5,624393382 | 5,403608584 | 5,235344128 | PCP009782 | XM_009359335 |
| PCP009824 | 4,604664415 | 5,073391816 | 5,700439718 | 5,073391816 | PCP009824 | XM_009346175 |
| PCP009828 | 5,77267747  | 5,781359714 | 6           | 5           | PCP009828 | NM_001328761 |
| PCP009857 | 4,604664415 | 5,333781501 | 5,369117459 | 5,691254979 | PCP009857 | XM_018645260 |
| PCP009889 | 6,790120385 | 6,914923239 | 6,291493053 | 6,254178286 | PCP009889 | XM_009357764 |
| PCP009902 | 6,564835417 | 6,47037417  | 6,922792504 | 7,318949464 | PCP009902 | XM_018647387 |
| PCP009913 | 6,309794644 | 6,189824559 | 6,266786541 | 5,841218374 | PCP009913 | XM_008376653 |
| PCP009920 | 5,584962501 | 5,663059924 | 5,59484709  | 6,589913261 |           |              |
| PCP009944 | 4,272769732 | 4,790250739 | 3,874796966 | 6,554588852 | PCP009944 | XM_009372261 |



|           |             |             |             |             |           |              |
|-----------|-------------|-------------|-------------|-------------|-----------|--------------|
| PCP009950 | 6,700439718 | 6,584962501 | 6,667750232 | 6,094447222 |           |              |
| PCP009964 | 6,754887502 | 6,80309785  | 6,686500527 | 6,303780748 | PCP009964 | XM_008377860 |
| PCP010003 | 6,420718183 | 6,528727582 | 6,54426899  | 5,807354922 | PCP010003 | XM_009364975 |
| PCP010025 | 6,486553493 | 5,882643049 | 5,523561956 | 4,059182199 | PCP010025 | XM_009365004 |
| PCP010037 | 6,594996337 | 6,115407855 | 6,481072857 | 6,291493053 | PCP010037 | XM_018648935 |
| PCP010049 | 6,47037417  | 6,291493053 | 5,260402093 | 3,772941338 | PCP010049 | XM_009365599 |
| PCP010065 | 3,584962501 | 4,807354922 | 5,718909554 | 5,169925001 | PCP010065 | XM_009364504 |
| PCP010098 | 5,824513297 | 4,718635616 | 4,682011391 | 4,459431619 | PCP010098 | XM_009342482 |
| PCP010113 | 5,841218374 | 6,534030467 | 6,409390936 | 7,018700931 |           |              |
| PCP010144 | 5,681730355 | 6,015024705 | 6,007419784 | 5,60496087  | PCP010144 | XM_009377344 |
| PCP010190 | 5,866166169 | 5,169925001 | 5,380937195 | 4,874305166 | PCP010190 | XM_009374096 |
| PCP010192 | 5,672425342 | 6,363346321 | 5,961854808 | 5,914803677 | PCP010192 | XM_009374097 |
| PCP010222 | 5,789990019 | 5,938521046 | 5           | 4,874305166 | PCP010222 | XM_009373515 |
| PCP010254 | 6,163297449 | 6,667750232 | 6,50779464  | 5,984817174 | PCP010254 | XM_009376142 |
| PCP010280 | 5,169925001 | 5,634302842 | 6,454011343 | 5,415150205 |           |              |
| PCP010326 | 6,491853096 | 6,163297449 | 6,569855608 | 6,06608919  | PCP010326 | XM_009376399 |
| PCP010332 | 5,273142859 | 5,709566354 | 5,60496087  | 6,297741678 | PCP010332 | XM_009351819 |
| PCP010373 | 6,481072857 | 5,403608584 | 5,807354922 | 5,196528361 | PCP010373 | XM_009380920 |
| PCP010380 | 6,497133304 | 7,08395793  | 6,50255338  | 6,709704193 | PCP010380 | XM_008359420 |
| PCP010392 | 7,327956767 | 6,832890014 | 7,169925001 | 5,984817174 |           |              |
| PCP010404 | 6,84962403  | 7,173227395 | 6,564835417 | 6,662917555 | PCP010404 | XM_008369112 |
| PCP010444 | 4,682011391 | 5           | 5,247927513 | 5,807354922 | PCP010444 | XM_008378918 |
| PCP010448 | 6,183288001 | 6,579994693 | 6,523561956 | 5,969703088 | PCP010448 | XM_008378922 |
| PCP010451 | 6,807354922 | 6,156437068 | 6,183288001 | 6,648609245 | PCP010451 | XM_008379005 |
| PCP010474 | 5,129283017 | 5,309976492 | 5,297558281 | 6,345715709 |           |              |
| PCP010484 | 6,695854658 | 6,599912842 | 6,279285561 | 6,101608059 |           |              |
| PCP010487 | 5,832890014 | 5,681730355 | 5,727920455 | 5,309976492 |           |              |
| PCP010543 | 6,528727582 | 6,534030467 | 6,420718183 | 6,235152624 | PCP010543 | XM_018644023 |
| PCP010559 | 4,143230135 | 4,321928095 | 5,260402093 | 5,345893086 |           |              |
| PCP010610 | 4,662775172 | 4,480911346 | 4,95419631  | 5,807354922 | PCP010610 | XM_009364318 |
| PCP010613 | 4,790250739 | 4,34553831  | 5,260402093 | 4,169925001 | PCP010613 | XM_009364356 |
| PCP010635 | 4,029452886 | 5,77267747  | 5,523561956 | 6,906890596 | PCP010635 | XM_009352371 |
| PCP010639 | 6,414981143 | 6,559644763 | 6,86628983  | 7,183188734 |           |              |
| PCP010670 | 4,029452886 | 5,058749412 | 5,459431619 | 6,62935662  | PCP010670 | XM_018644144 |
| PCP010675 | 5,564683017 | 5,073391816 | 4,682011391 | 4,700439718 | PCP010675 | XM_018649215 |
| PCP010701 | 5,345893086 | 5,789990019 | 6,403778984 | 7,055282436 | PCP010701 | XM_009341224 |
| PCP010715 | 6,333960351 | 6,38663853  | 6,862079387 | 7,189824559 | PCP010715 | XM_008361427 |
| PCP010733 | 6,886672074 | 6,559644763 | 6,584962501 | 6,363346321 | PCP010733 | XR_668579    |
| PCP010754 | 4,143230135 | 4,34553831  | 4,604664415 | 6,345715709 | PCP010754 | XM_009343990 |
| PCP010767 | 6,624539604 | 6,454011343 | 6,414981143 | 6,291493053 | PCP010767 | XM_009347851 |
| PCP010801 | 6,007419784 | 5,247927513 | 5,709566354 | 4,874305166 | PCP010801 | XM_008345517 |
| PCP010803 | 6,961970533 | 6,934634441 | 6,64385619  | 5,321928095 | PCP010803 | XM_009374944 |
| PCP010804 | 7,033423002 | 6,513016928 | 6,705010253 | 6,24164954  | PCP010804 | NM_001293900 |
| PCP010810 | 5,247927513 | 4,604664415 | 4,718635616 | 4,502712486 | PCP010810 | XM_009350215 |
| PCP010812 | 6,420718183 | 5,874551087 | 5,946496941 | 6,007419784 |           |              |
| PCP010888 | 5,014801602 | 5,554588852 | 5,961854808 | 6,094447222 | PCP010888 | XM_009362291 |

|           |             |             |             |             |           |              |
|-----------|-------------|-------------|-------------|-------------|-----------|--------------|
| PCP010943 | 7,282347131 | 6,84962403  | 6,369291982 | 6,022367813 |           |              |
| PCP010951 | 6,235152624 | 6,260590275 | 6,497133304 | 7,076815597 | PCP010951 | XM_008377808 |
| PCP010957 | 5,841218374 | 5,169925001 | 4,969472865 | 5,115615931 | PCP010957 | XM_009352717 |
| PCP010958 | 5,403608584 | 5,058749412 | 5,297558281 | 4,459431619 | PCP010958 | XM_021976056 |
| PCP010960 | 6,094447222 | 6,745909573 | 7,297649983 | 6,914923239 | PCP010960 | XM_009365137 |
| PCP010966 | 5,369117459 | 4,754887502 | 4,662775172 | 4,459431619 | PCP010966 | XM_009366760 |
| PCP011011 | 5,297558281 | 4,969472865 | 4,087462841 | 4,321928095 | PCP011011 | XR_001791946 |
| PCP011013 | 5,142821844 | 4,807354922 | 4,480911346 | 4,321928095 | PCP011013 | XM_008367659 |
| PCP011024 | 6,624539604 | 5,969703088 | 6,176522247 | 6,156437068 |           |              |
| PCP011034 | 7,058857621 | 6,768184325 | 6,737010678 | 6,81159947  | PCP011034 | XM_008390591 |
| PCP011036 | 6,309794644 | 5,746043983 | 5,898933872 | 5,448570626 |           |              |
| PCP011059 | 6,574858391 | 5,369117459 | 5,087462841 | 3,321928095 |           |              |
| PCP011069 | 6,658211483 | 6,658211483 | 6,589913261 | 6,380764075 | PCP011069 | XM_018651260 |
| PCP011073 | 5           | 5,470211457 | 5,523561956 | 5,984817174 | PCP011073 | XM_009345365 |
| PCP011082 | 4,584962501 | 4,824258697 | 5,297558281 | 5,946496941 | PCP011082 | XM_008357158 |
| PCP011120 | 6,464831606 | 6,235152624 | 6,832890014 | 5,882643049 | PCP011120 | XM_008387935 |
| PCP011149 | 5,48123435  | 6,285402219 | 6,309794644 | 5,781359714 | PCP011149 | XM_008377859 |
| PCP011170 | 2,321928095 | 5,64385619  | 5,470211457 | 4,624685811 | PCP011170 | XM_008393210 |
| PCP011174 | 6,95419631  | 6,196331634 | 6,564835417 | 6,403778984 | PCP011174 | XM_009373893 |
| PCP011214 | 5,415150205 | 5,554588852 | 5,984817174 | 6,584962501 | PCP011214 | XM_009347101 |
| PCP011255 | 6,579994693 | 6,658211483 | 6,677085351 | 6,087462841 | PCP011255 | XM_009342056 |
| PCP011259 | 6,309794644 | 6,448405435 | 7,029784146 | 7,564759219 | PCP011259 | XR_668727    |
| PCP011270 | 5,969703088 | 5,824513297 | 5,914803677 | 5,426264755 | PCP011270 | XM_009345007 |
| PCP011275 | 5,977279923 | 5,584962501 | 5,345893086 | 5,156639311 | PCP011275 | XM_009339202 |
| PCP011290 | 4,841469999 | 4,544114402 | 6,594996337 | 5,014801602 | PCP011290 | XM_008379204 |
| PCP011334 | 5,544423562 | 5,961854808 | 5,866166169 | 7,569855608 |           |              |
| PCP011371 | 6,38663853  | 6,357552005 | 6,832890014 | 7,315874125 | PCP011371 | XM_009370540 |
| PCP011399 | 5,321928095 | 5,426264755 | 6,176522247 | 6,196331634 | PCP011399 | XR_666213    |
| PCP011400 | 6,454011343 | 6,321928095 | 6,431790083 | 6,080444483 | PCP011400 | XM_009349994 |
| PCP011402 | 5,857980995 | 5,866166169 | 5,857980995 | 6,564835417 | PCP011402 | XM_009349981 |
| PCP011451 | 4,890933022 | 4,874305166 | 6,448405435 | 7,263691734 | PCP011451 | XM_009380523 |
| PCP011471 | 6,942514505 | 6,853870927 | 6,777025123 | 6,614709844 | PCP011471 | XM_018650179 |
| PCP011490 | 5,209453366 | 4,841469999 | 6,136068312 | 5,922911406 | PCP011490 | XM_009355182 |
| PCP011523 | 6,732404887 | 7,003714662 | 6,60481265  | 6,297741678 | PCP011523 | XM_008389080 |
| PCP011550 | 6,260590275 | 7,029784146 | 6,777025123 | 7,098032083 |           |              |
| PCP011561 | 5,746043983 | 6,279285561 | 6,07317756  | 5,866166169 | PCP011561 | XM_008349879 |
| PCP011584 | 5,369117459 | 6,06608919  | 5,922911406 | 5,073391816 |           |              |
| PCP011597 | 5,807354922 | 5,448570626 | 4,700439718 | 4,564987801 | PCP011597 | XM_009344191 |
| PCP011626 | 5,849749117 | 6,115407855 | 6,279285561 | 6,759289016 |           |              |
| PCP011627 | 7,069637728 | 6,31596467  | 6,700439718 | 6,309794644 | PCP011627 | XM_008363573 |
| PCP011654 | 6           | 6,051589621 | 6,523561956 | 6,926829678 | PCP011654 | XM_009346443 |
| PCP011671 | 5,898933872 | 6,375039431 | 6,183288001 | 6,754887502 | PCP011671 | XM_008345403 |
| PCP011679 | 5,297558281 | 4,824258697 | 6,029673735 | 6,333960351 | PCP011679 | XM_009346868 |
| PCP011689 | 6           | 5,736875423 | 5,533874777 | 5,273142859 | PCP011689 | XM_018647179 |
| PCP011691 | 6,169925001 | 5,95419631  | 6,115407855 | 5,624393382 | PCP011691 | XM_009356813 |
| PCP011698 | 6,95419631  | 6,375039431 | 6,101608059 | 5,727920455 | PCP011698 | XM_009356129 |

|           |             |             |             |             |           |              |
|-----------|-------------|-------------|-------------|-------------|-----------|--------------|
| PCP011705 | 6           | 4,087462841 | 3,221877081 | 7,811663685 | PCP011705 | XM_009354814 |
| PCP011721 | 6,448405435 | 6,741466986 | 6,794415866 | 7,125878364 |           |              |
| PCP011728 | 5,977279923 | 6,84962403  | 6,285402219 | 6,007419784 | PCP011728 | XM_009361816 |
| PCP011737 | 5,129283017 | 6,015024705 | 4,922673593 | 4,824258697 |           |              |
| PCP011738 | 6,763809907 | 6,874428132 | 6,777025123 | 6,589913261 | PCP011738 | XM_009361803 |
| PCP011779 | 5,169925001 | 5,584962501 | 6,156437068 | 6,285402219 | PCP011779 | XR_001951337 |
| PCP011788 | 7,318949464 | 6,662917555 | 6,857980995 | 6,594996337 | PCP011788 | XM_009366727 |
| PCP011808 | 6,156437068 | 6,426264755 | 6,38663853  | 5,882643049 | PCP011808 | XM_008354615 |
| PCP011809 | 5,415150205 | 4,700439718 | 4,297925053 | 4,874305166 | PCP011809 | XM_008341046 |
| PCP011859 | 6,363346321 | 6,080444483 | 6,86628983  | 7,163196797 | PCP011859 | XM_008385585 |
| PCP011870 | 6,143026004 | 6,523561956 | 6,497133304 | 5,832890014 | PCP011870 | XM_008360472 |
| PCP011871 | 6,634157606 | 6,768184325 | 6,47037417  | 6,369291982 |           |              |
| PCP011885 | 6,03716255  | 6,695854658 | 6,38663853  | 6,058965822 |           |              |
| PCP011894 | 3,969933275 | 5,946496941 | 6,189824559 | 8,850718177 | PCP011894 | XM_009350624 |
| PCP011896 | 5,285402219 | 4,874305166 | 5,044394119 | 5,930737338 |           |              |
| PCP011900 | 7,648681141 | 6,426264755 | 6,714245518 | 6,136068312 | PCP011900 | XM_008393501 |
| PCP011929 | 6,54426899  | 6,222456826 | 6,06608919  | 5,798828178 | PCP011929 | XM_009347931 |
| PCP011941 | 6,397974049 | 5,491853096 | 5,513174885 | 5,247927513 |           |              |
| PCP011963 | 5,426264755 | 4,824258697 | 4,841469999 | 4,34553831  | PCP011963 | XM_009348353 |
| PCP011977 | 6,31596467  | 6,50255338  | 6,574858391 | 7,321928095 |           |              |
| PCP011986 | 5,285402219 | 4,985044962 | 6,266786541 | 7,026025399 | PCP011986 | XM_008370019 |
| PCP011991 | 5,789990019 | 5,209453366 | 5,273142859 | 4,718635616 |           |              |
| PCP012022 | 6,898812977 | 7,166615031 | 6,785681319 | 6,594996337 | PCP012022 | XM_009336151 |
| PCP012044 | 6,303780748 | 5,922911406 | 5,044394119 | 5,59484709  | PCP012044 | XM_009357968 |
| PCP012052 | 5,718909554 | 5,614709844 | 5,849749117 | 7,377904593 | PCP012052 | XM_008393281 |
| PCP012056 | 5,914803677 | 5,02989455  | 5,183089461 | 5,058749412 | PCP012056 | XM_009369342 |
| PCP012058 | 6,750472519 | 6,397974049 | 7           | 7,17990909  | PCP012058 | XM_009369374 |
| PCP012078 | 5,584962501 | 5,841218374 | 6,363346321 | 6,589913261 | PCP012078 | XM_009373892 |
| PCP012101 | 6,942514505 | 6,528727582 | 6,634157606 | 6,31596467  | PCP012101 | XM_009350586 |
| PCP012104 | 6,934634441 | 6,143026004 | 6,015024705 | 5,59484709  | PCP012104 | XM_009374302 |
| PCP012117 | 6,781359714 | 6,431790083 | 6,691115365 | 6,448405435 | PCP012117 | XM_008353378 |
| PCP012151 | 6,579994693 | 6,874428132 | 6,431790083 | 6,279285561 | PCP012151 | XM_009371305 |
| PCP012193 | 5,297558281 | 5,437294331 | 5,523561956 | 6,176522247 | PCP012193 | XR_526733    |
| PCP012210 | 4,64385619  | 4,437627248 | 4,459431619 | 5,882643049 |           |              |
| PCP012226 | 6,115407855 | 6,176522247 | 6,491853096 | 7,142923928 | PCP012226 | XM_009343802 |
| PCP012254 | 6,569855608 | 5,653346693 | 4,938756261 | 3,874796966 | PCP012254 | XM_008362276 |
| PCP012285 | 5,77267747  | 5,101397952 | 5,700439718 | 6,667750232 | PCP012285 | XM_009342989 |
| PCP012302 | 5,763677142 | 5,513174885 | 5,832890014 | 5,196528361 |           |              |
| PCP012316 | 5,183089461 | 5,459431619 | 5,938521046 | 6,772545519 | PCP012316 | XM_018650378 |
| PCP012355 | 5,95419631  | 5,653346693 | 5,624393382 | 4,841469999 | PCP012355 | XM_009367530 |
| PCP012387 | 6,022367813 | 5,169925001 | 5,247927513 | 5,321928095 |           |              |
| PCP012388 | 5,64385619  | 4,857980995 | 4,321928095 | 3,502075956 |           |              |
| PCP012443 | 5,614709844 | 5,984817174 | 6,24164954  | 7,087462841 | PCP012443 | XM_009340428 |
| PCP012479 | 5,235344128 | 5,57500972  | 6,051589621 | 6,686500527 | PCP012479 | XM_009378516 |
| PCP012552 | 7,17990909  | 7,266786541 | 6,62935662  | 6,196331634 | PCP012552 | XM_009370290 |
| PCP012628 | 6,705010253 | 5,392317423 | 3,584962501 | 3,058316496 | PCP012628 | XM_009369277 |

|           |             |             |             |             |           |              |
|-----------|-------------|-------------|-------------|-------------|-----------|--------------|
| PCP012705 | 5,309976492 | 5,992541859 | 6,4374608   | 6,922792504 | PCP012705 | XR_001954740 |
| PCP012771 | 5,614709844 | 5,058749412 | 5,115615931 | 4,459431619 | PCP012771 | XM_009354789 |
| PCP012775 | 5,95419631  | 5,357552005 | 5,736875423 | 5,380937195 | PCP012775 | XM_008365076 |
| PCP012804 | 6,459431619 | 6,122465658 | 6,108524457 | 6,03716255  |           |              |
| PCP012816 | 5,247927513 | 5,502394256 | 4,969472865 | 4,369466484 |           |              |
| PCP012817 | 6           | 5,709566354 | 6,534030467 | 7,026025399 | PCP012817 | XM_009373654 |
| PCP012855 | 6,156437068 | 6           | 6,015024705 | 6,798698597 | PCP012855 | XM_009364145 |
| PCP012862 | 5,614709844 | 6,392317423 | 5,437294331 | 5,357552005 | PCP012862 | XM_008377842 |
| PCP012978 | 6,260590275 | 5,196528361 | 5,222263604 | 5,285402219 | PCP012978 | XM_018651580 |
| PCP012980 | 6,015024705 | 6,486553493 | 5,523561956 | 4,059182199 | PCP012980 | XM_009376877 |
| PCP013010 | 5,247927513 | 5,058749412 | 5,222263604 | 6,087462841 | PCP013010 | XM_017329476 |
| PCP013014 | 6,333960351 | 6,247927513 | 6,247927513 | 5,857980995 | PCP013014 | XM_009365202 |
| PCP013025 | 6,54426899  | 6,906890596 | 6,539158811 | 6,345715709 | PCP013025 | XM_009337979 |
| PCP013032 | 5,824513297 | 6,303780748 | 5,700439718 | 4,969472865 | PCP013032 | XM_020562191 |
| PCP013035 | 4,64385619  | 5,235344128 | 6,215872703 | 5,014801602 | PCP013035 | XM_007223879 |
| PCP013053 | 6,051589621 | 5,196528361 | 4,272769732 | 4,196134881 | PCP013053 | XM_008374883 |
| PCP013095 | 5,544423562 | 5,403608584 | 5,564683017 | 6,285402219 | PCP013095 | XM_008363539 |
| PCP013100 | 4,73714592  | 5,058749412 | 4,938756261 | 7,327956767 | PCP013100 | XM_008363532 |
| PCP013104 | 6,898812977 | 6,894817763 | 6,54426899  | 6,129283017 | PCP013104 | XM_017323790 |
| PCP013113 | 6,486553493 | 5,624393382 | 5,841218374 | 5,882643049 | PCP013113 | XM_018646652 |
| PCP013154 | 5,815831566 | 5,309976492 | 4,922673593 | 4,247927513 | PCP013154 | XM_009372907 |
| PCP013202 | 5,513174885 | 5,857980995 | 6,129283017 | 6,589913261 | PCP013202 | XM_009370903 |
| PCP013205 | 6,718772592 | 6,745909573 | 6,215872703 | 6,03716255  | PCP013205 | XM_009370899 |
| PCP013210 | 6,426264755 | 6,24164954  | 5,624393382 | 6,369291982 | PCP013210 | XM_009370889 |
| PCP013243 | 5,380937195 | 5,448570626 | 5,584962501 | 6,497133304 | PCP013243 | XM_009339993 |
| PCP013247 | 5,297558281 | 4,718635616 | 5,101397952 | 4,321928095 | PCP013247 | XM_009339990 |
| PCP013255 | 7,153095972 | 6,686500527 | 6,448405435 | 6,351734323 | PCP013255 | XM_008340167 |
| PCP013285 | 5,554588852 | 6,209453366 | 6,169925001 | 6,426264755 | PCP013285 | XM_009366305 |
| PCP013306 | 7,076815597 | 6,327866971 | 6,569855608 | 5,984817174 | PCP013306 | XM_009381287 |
| PCP013310 | 6,339850003 | 6,321928095 | 6,619559738 | 7,462134139 | PCP013310 | XM_009381292 |
| PCP013326 | 6,564835417 | 6,222456826 | 6,431790083 | 7,21916852  | PCP013326 | XM_009339860 |
| PCP013330 | 5,882643049 | 5,653346693 | 6,339850003 | 6,579994693 |           |              |
| PCP013344 | 6,203005338 | 5,273142859 | 5,196528361 | 4,64385619  |           |              |
| PCP013350 | 6,759289016 | 6,695854658 | 6,68187088  | 7,263691734 | PCP013350 | XM_009376233 |
| PCP013360 | 7,251056285 | 6,841344192 | 6,72342204  | 6,203005338 | PCP013360 | XM_009376250 |
| PCP013414 | 5,634302842 | 5,914803677 | 5,672425342 | 6,448405435 | PCP013414 | XM_009370808 |
| PCP013429 | 6,07317756  | 6,247927513 | 6,122465658 | 5,857980995 | PCP013429 | XM_009342559 |
| PCP013453 | 3,169925001 | 3,624100895 | 5,614709844 | 5,681730355 | PCP013453 | XM_017333364 |
| PCP013459 | 6,807354922 | 6,54951516  | 6,564835417 | 6,426264755 | PCP013459 | XM_009354885 |
| PCP013462 | 5,156639311 | 4,772413555 | 4,682011391 | 4,222650022 | PCP013462 | XM_009354878 |
| PCP013468 | 6,745909573 | 3,969933275 | 5,345893086 | 5           | PCP013468 | XM_009365042 |
| PCP013469 | 5           | 4,969472865 | 5,906890596 | 5,984817174 | PCP013469 | XM_009365093 |
| PCP013487 | 6,176522247 | 6,266786541 | 6,051589621 | 5,906890596 | PCP013487 | XM_009365346 |
| PCP013539 | 5,922911406 | 4,874305166 | 3,906890596 | 4,115199749 |           |              |
| PCP013576 | 6,513016928 | 5,624393382 | 5,815831566 | 5,101397952 | PCP013576 | XM_009352893 |
| PCP013597 | 5,209453366 | 5,849749117 | 6,215872703 | 6,380764075 | PCP013597 | XM_009345365 |

|           |             |             |             |             |           |              |
|-----------|-------------|-------------|-------------|-------------|-----------|--------------|
| PCP013600 | 5,736875423 | 5,345893086 | 6,369291982 | 7,105070402 | PCP013600 | XM_009340444 |
| PCP013631 | 5,142821844 | 5,832890014 | 5,59484709  | 6,07317756  | PCP013631 | XM_009355354 |
| PCP013645 | 5,02989455  | 5,058749412 | 5,073391816 | 6           | PCP013645 | XM_009356354 |
| PCP013657 | 5,129283017 | 5,297558281 | 5,922911406 | 6,24164954  | PCP013657 | XM_009356234 |
| PCP013663 | 6,639087423 | 6,291493053 | 6,481072857 | 6,961970533 | PCP013663 | XM_008343352 |
| PCP013664 | 5,849749117 | 4,73714592  | 4,564987801 | 4,564987801 | PCP013664 | XM_008355199 |
| PCP013691 | 4,059182199 | 4,718635616 | 6,209453366 | 5,058749412 | PCP013691 | XM_009378064 |
| PCP013730 | 5,781359714 | 5,763677142 | 6,189824559 | 7,018700931 | PCP013730 | XM_009381127 |
| PCP013765 | 6,894817763 | 6,554588852 | 6,709704193 | 6,363346321 | PCP013765 | XM_009366538 |
| PCP013773 | 6,176522247 | 6,215872703 | 6,279285561 | 6,938638658 | PCP013773 | XM_009361271 |
| PCP013774 | 5,321928095 | 5,653346693 | 5,746043983 | 6,4374608   | PCP013774 | XM_018648167 |
| PCP013775 | 5,309976492 | 6,108524457 | 6,058965822 | 6,24164954  | PCP013775 | XM_009361269 |
| PCP013888 | 5,554588852 | 6,051589621 | 6,327866971 | 6,62935662  |           |              |
| PCP013897 | 5,614709844 | 5,345893086 | 4,985044962 | 4,604664415 | PCP013897 | XM_009339530 |
| PCP013903 | 6,297741678 | 5,554588852 | 6,129283017 | 5,681730355 | PCP013903 | XM_009369071 |
| PCP013911 | 5,459431619 | 5,044394119 | 5,209453366 | 6,777025123 |           |              |
| PCP013958 | 4,824258697 | 6,523561956 | 6,333960351 | 8,338379842 | PCP013958 | XM_018649522 |
| PCP013975 | 5,554588852 | 5,709566354 | 4,922673593 | 4,64385619  |           |              |
| PCP013976 | 5,513174885 | 6,087462841 | 6,481072857 | 6,594996337 |           |              |
| PCP014012 | 5,874551087 | 6,4374608   | 6,930737338 | 7,958088658 | PCP014012 | XM_008242056 |
| PCP014016 | 7,351645995 | 5,345893086 | 6,07317756  | 6,189824559 | PCP014016 | XR_001951611 |
| PCP014021 | 6,309794644 | 6,363346321 | 6,203005338 | 6,022367813 | PCP014021 | XM_009339045 |
| PCP014034 | 5,60496087  | 4,64385619  | 4,502712486 | 3,807354922 | PCP014034 | XM_009377126 |
| PCP014040 | 6,420718183 | 6,163297449 | 6,392317423 | 7,448488033 | PCP014040 | XM_009346188 |
| PCP014043 | 6,272956308 | 5,60496087  | 5,437294331 | 5,736875423 | PCP014043 | XM_009373655 |
| PCP014048 | 4,459431619 | 4,73714592  | 5,533874777 | 6,431790083 | PCP014048 | XM_009338152 |
| PCP014060 | 4,143230135 | 4,807354922 | 5,700439718 | 4,841469999 |           |              |
| PCP014153 | 3,116031993 | 3           | 4,64385619  | 9,326429487 | PCP014153 | XM_009371990 |
| PCP014204 | 5,624393382 | 5,345893086 | 4,272769732 | 3,584962501 | PCP014204 | XM_009369473 |
| PCP014219 | 3,584962501 | 4,922673593 | 5,77267747  | 4,247927513 |           |              |
| PCP014232 | 6,84962403  | 6,309794644 | 5,672425342 | 6,058965822 | PCP014232 | XM_009363838 |
| PCP014233 | 6,38663853  | 6,297741678 | 6,828707735 | 7,115511897 |           |              |
| PCP014261 | 4,73714592  | 4,087462841 | 5,403608584 | 4,718635616 | PCP014261 | XM_009348584 |
| PCP014267 | 6,4374608   | 6,420718183 | 6,475733431 | 7,247927513 |           |              |
| PCP014268 | 5,169925001 | 5,309976492 | 3,840966704 | 4,321928095 |           |              |
| PCP014294 | 6,115407855 | 6,619559738 | 6,189824559 | 6,874428132 | PCP014294 | XM_008353447 |
| PCP014302 | 6,639087423 | 6,934634441 | 6,101608059 | 6,087462841 |           |              |
| PCP014304 | 5,209453366 | 5,882643049 | 6,737010678 | 7,018700931 | PCP014304 | XM_008350353 |
| PCP014317 | 4,414812061 | 5,101397952 | 4,969472865 | 5,564683017 | PCP014317 | XR_529968    |
| PCP014319 | 5,357552005 | 5,115615931 | 5,044394119 | 4,369466484 | PCP014319 | XM_009359146 |
| PCP014331 | 6,196331634 | 6,426264755 | 5,922911406 | 5,922911406 | PCP014331 | XM_009343804 |
| PCP014332 | 6,339850003 | 6,639087423 | 6,832890014 | 7,462134139 |           |              |
| PCP014350 | 6,709704193 | 6,926829678 | 6,691115365 | 4,938756261 |           |              |
| PCP014468 | 3,807354922 | 4           | 5,849749117 | 4,969472865 | PCP014468 | XM_008370092 |
| PCP014561 | 6,759289016 | 6,686500527 | 6,700439718 | 5,77267747  | PCP014561 | XM_009376002 |
| PCP014577 | 6,54426899  | 5,914803677 | 5,961854808 | 5,380937195 | PCP014577 | XM_009376036 |

|           |             |             |             |             |           |              |
|-----------|-------------|-------------|-------------|-------------|-----------|--------------|
| PCP014600 | 6,080444483 | 6,129283017 | 5,321928095 | 3,969933275 |           |              |
| PCP014647 | 4,087462841 | 4,841469999 | 5,448570626 | 6,215872703 | PCP014647 | XM_008366360 |
| PCP014650 | 5,058749412 | 5           | 6,122465658 | 4,95419631  | PCP014650 | XM_009352529 |
| PCP014717 | 5,087462841 | 4,938756261 | 5,59484709  | 4,700439718 |           |              |
| PCP014736 | 6,619559738 | 6,695854658 | 6,574858391 | 6,044394119 | PCP014736 | XM_009366283 |
| PCP014773 | 2,114367025 | 3,321928095 | 4,029452886 | 8,493174961 | PCP014773 | XM_009355003 |
| PCP014780 | 6,015024705 | 5,624393382 | 6,015024705 | 5,273142859 | PCP014780 | XM_018646794 |
| PCP014781 | 5,426264755 | 6,203005338 | 6,718772592 | 7,655852677 | PCP014781 | XM_009354993 |
| PCP014784 | 5,129283017 | 6,080444483 | 6,961970533 | 8,042589623 |           |              |
| PCP014808 | 4,604664415 | 5,977279923 | 6,807354922 | 5,691254979 | PCP014808 | XM_009355728 |
| PCP014809 | 6,403778984 | 6,609843592 | 5,815831566 | 5,196528361 | PCP014809 | XM_009342013 |
| PCP014862 | 5,470211457 | 7,269874722 | 7,431873638 | 6,677085351 | PCP014862 | XM_008374321 |
| PCP014863 | 4,196134881 | 4,143230135 | 4,906890596 | 5,333781501 | PCP014863 | XM_017332090 |
| PCP014895 | 6,672425342 | 6,634157606 | 6,14974712  | 4,969472865 |           |              |
| PCP014918 | 7,101503009 | 6,785681319 | 7,051698368 | 6,528727582 | PCP014918 | XM_009380731 |
| PCP014919 | 6,653490009 | 5,914803677 | 6,47037417  | 6,044394119 | PCP014919 | XM_009380731 |
| PCP014983 | 5,333781501 | 5,807354922 | 5,754887502 | 6,459431619 | PCP014983 | XM_009377701 |
| PCP014985 | 5,95419631  | 5,969703088 | 6,539158811 | 6,934634441 |           |              |
| PCP014994 | 5,789990019 | 6,285402219 | 6,534030467 | 6,942514505 |           |              |
| PCP015060 | 5,403608584 | 5,554588852 | 5,798828178 | 6,363346321 | PCP015060 | XM_009345279 |
| PCP015070 | 2,22342255  | 4,321928095 | 3,969933275 | 7,50779464  | PCP015070 | XM_018649595 |
| PCP015083 | 4,502712486 | 5,513174885 | 6,22881869  | 4,437627248 | PCP015083 | XM_018652126 |
| PCP015084 | 3,840966704 | 4,969472865 | 5,60496087  | 4,392317423 | PCP015084 | XM_018652125 |
| PCP015100 | 5,297558281 | 5,333781501 | 5,841218374 | 4,502712486 | PCP015100 | XM_009377278 |
| PCP015101 | 6,886672074 | 7,026025399 | 6,672425342 | 6,051589621 | PCP015101 | XM_009377281 |
| PCP015115 | 3,624100895 | 4,437627248 | 6           | 7,380850638 |           |              |
| PCP015126 | 6,54951516  | 6,790120385 | 6,143026004 | 6,403778984 | PCP015126 | XR_001952614 |
| PCP015149 | 6,189824559 | 5,906890596 | 6,044394119 | 7,336908182 | PCP015149 | XM_009379485 |
| PCP015163 | 5,922911406 | 5,014801602 | 5,357552005 | 4,662775172 | PCP015163 | XM_009374707 |
| PCP015167 | 5,156639311 | 5,403608584 | 5,672425342 | 3,840966704 | PCP015167 | XM_009347113 |
| PCP015191 | 6,68187088  | 6,454011343 | 6,890811455 | 7,212666605 | PCP015191 | XM_008377515 |
| PCP015216 | 5,736875423 | 5,866166169 | 5,297558281 | 5,196528361 | PCP015216 | XM_009344624 |
| PCP015227 | 5,437294331 | 5,513174885 | 5,624393382 | 6,431790083 |           |              |
| PCP015229 | 6,222456826 | 5,798828178 | 5,866166169 | 5,691254979 | PCP015229 | XM_009361942 |
| PCP015254 | 6,977279923 | 7,044394119 | 6,667750232 | 5,866166169 | PCP015254 | XM_017327492 |
| PCP015263 | 5,906890596 | 5,77267747  | 5,087462841 | 4,544114402 | PCP015263 | XM_009343054 |
| PCP015268 | 6,554588852 | 6,163297449 | 6,420718183 | 5,922911406 | PCP015268 | XM_018649446 |
| PCP015273 | 6,87036472  | 6,648609245 | 6,321928095 | 6,044394119 | PCP015273 | XM_017334122 |
| PCP015289 | 6,24164954  | 6,058965822 | 5,321928095 | 5,357552005 | PCP015289 | XM_009353217 |
| PCP015294 | 6,03716255  | 5,736875423 | 5,209453366 | 5,459431619 | PCP015294 | XM_008375517 |
| PCP015301 | 6           | 6,108524457 | 7,429030064 | 7,026025399 | PCP015301 | XM_009371303 |
| PCP015311 | 6,554588852 | 6,022367813 | 6,420718183 | 5,992541859 | PCP015311 | NM_001294001 |
| PCP015351 | 5,513174885 | 5,554588852 | 5,807354922 | 6,454011343 | PCP015351 | XM_017329572 |
| PCP015353 | 6,732404887 | 6,737010678 | 6,491853096 | 6,47037417  | PCP015353 | XM_008354630 |
| PCP015360 | 4,143230135 | 4,502712486 | 4,874305166 | 5,321928095 | PCP015360 | XM_009344812 |
| PCP015385 | 6,619559738 | 6,169925001 | 6,183288001 | 6,029673735 | PCP015385 | XM_009344166 |

|           |             |             |             |             |           |              |
|-----------|-------------|-------------|-------------|-------------|-----------|--------------|
| PCP015402 | 6,136068312 | 6,677085351 | 6,695854658 | 7,156538193 | PCP015402 | XM_009366999 |
| PCP015448 | 5,64385619  | 6,215872703 | 6,203005338 | 5,222263604 |           |              |
| PCP015463 | 6,815959618 | 6,820178962 | 6,594996337 | 6,584962501 | PCP015463 | XM_017336087 |
| PCP015468 | 5,297558281 | 5,59484709  | 5,746043983 | 4,824258697 |           |              |
| PCP015469 | 6,015024705 | 5,073391816 | 5,584962501 | 5,763677142 | PCP015469 | XM_008368568 |
| PCP015481 | 6,68187088  | 6,47037417  | 6,54951516  | 7,166615031 | PCP015481 | XM_009357231 |
| PCP015486 | 5,832890014 | 5,415150205 | 5,681730355 | 4,969472865 |           |              |
| PCP015487 | 6,215872703 | 5,491853096 | 5,718909554 | 4,906890596 |           |              |
| PCP015489 | 6,72342204  | 6,554588852 | 6,163297449 | 5,709566354 | PCP015489 | XM_009339084 |
| PCP015514 | 6,369291982 | 6,481072857 | 6,672425342 | 6,029673735 | PCP015514 | XM_018644395 |
| PCP015536 | 5,183089461 | 5,663059924 | 5,415150205 | 6,409390936 | PCP015536 | XM_009344424 |
| PCP015552 | 6,254178286 | 6,853870927 | 6,47037417  | 7,173227395 | PCP015552 | XM_008363354 |
| PCP015561 | 4,790250739 | 4,807354922 | 5,824513297 | 6,285402219 |           |              |
| PCP015582 | 6,475733431 | 6,491853096 | 6,745909573 | 7,552054236 | PCP015582 | XM_009366090 |
| PCP015611 | 5,64385619  | 6,357552005 | 6,222456826 | 6,454011343 | PCP015611 | XM_008367022 |
| PCP015645 | 5,946496941 | 6,215872703 | 5,906890596 | 5,781359714 |           |              |
| PCP015649 | 6,579994693 | 6,448405435 | 6,981053471 | 6,539158811 | PCP015649 | XM_009336017 |
| PCP015721 | 5,544423562 | 5,57500972  | 6,38663853  | 6,321928095 | PCP015721 | XM_009377609 |
| PCP015722 | 6,824386003 | 6,528727582 | 7,06608919  | 6,648609245 | PCP015722 | XM_009347614 |
| PCP015789 | 6,247927513 | 5,380937195 | 5,369117459 | 5,48123435  | PCP015789 | XM_009335970 |
| PCP015838 | 6,380764075 | 6,50255338  | 5,961854808 | 5,824513297 | PCP015838 | XM_018647441 |
| PCP015888 | 4,272769732 | 4,938756261 | 5,309976492 | 5,736875423 | PCP015888 | XM_008238111 |
| PCP015991 | 5,807354922 | 6,481072857 | 6,029673735 | 7,055282436 |           |              |
| PCP015992 | 6,058965822 | 5,736875423 | 6,163297449 | 6,87036472  | PCP015992 | XM_018649386 |
| PCP015994 | 6,754887502 | 6,87036472  | 6,824386003 | 6,639087423 | PCP015994 | XM_021973623 |
| PCP016072 | 5,513174885 | 5,142821844 | 4,857980995 | 4,841469999 |           |              |
| PCP016079 | 5,763677142 | 4,969472865 | 4,790250739 | 4,584962501 | PCP016079 | XM_008374779 |
| PCP016086 | 6,044394119 | 5,247927513 | 4,906890596 | 4,64385619  | PCP016086 | NM_001302317 |
| PCP016130 | 5,672425342 | 6,448405435 | 6,922792504 | 7,536596918 | PCP016130 | XM_008353369 |
| PCP016152 | 6,981053471 | 6,815959618 | 6,54951516  | 6,357552005 | PCP016152 | XM_008395388 |
| PCP016154 | 6,914923239 | 7,080337882 | 6,878602742 | 6,403778984 | PCP016154 | XM_009364657 |
| PCP016161 | 5,700439718 | 5,02989455  | 5,260402093 | 4,624685811 | PCP016161 | XM_009364109 |
| PCP016182 | 5,815831566 | 6,339850003 | 6,534030467 | 7,392317423 | PCP016182 | XM_009364507 |
| PCP016207 | 5,634302842 | 5,297558281 | 5,380937195 | 3,502075956 | PCP016207 | XM_009364805 |
| PCP016213 | 6,129283017 | 5,914803677 | 6,459431619 | 7,073284692 | PCP016213 | XM_018648889 |
| PCP016236 | 5,57500972  | 5,087462841 | 4,437627248 | 4           | PCP016236 | XM_009337840 |
| PCP016253 | 6,183288001 | 6,279285561 | 6,50779464  | 7,087462841 | PCP016253 | XM_017328806 |
| PCP016266 | 6,942514505 | 5,209453366 | 5,321928095 | 7,069637728 |           |              |
| PCP016321 | 6,291493053 | 6,176522247 | 6,183288001 | 5,513174885 | PCP016321 | XM_009374436 |
| PCP016323 | 5,426264755 | 5,014801602 | 4,459431619 | 5,309976492 | PCP016323 | XM_008387666 |
| PCP016347 | 5,77267747  | 5,59484709  | 5,841218374 | 4,682011391 | PCP016347 | XM_009376349 |
| PCP016357 | 5,333781501 | 4,480911346 | 4,604664415 | 4,544114402 | PCP016357 | XM_009376219 |
| PCP016372 | 6,745909573 | 6,564835417 | 6,50779464  | 7,105070402 | PCP016372 | XM_009363182 |
| PCP016377 | 6,156437068 | 5,789990019 | 6,392317423 | 6,718772592 |           |              |
| PCP016384 | 5,969703088 | 6,22881869  | 6,38663853  | 6,926829678 |           |              |
| PCP016385 | 6,254178286 | 6,569855608 | 5,798828178 | 5,807354922 | PCP016385 | XM_009362994 |

|           |             |             |             |             |           |              |
|-----------|-------------|-------------|-------------|-------------|-----------|--------------|
| PCP016387 | 6,31596467  | 6,321928095 | 6,475733431 | 7,055282436 | PCP016387 | XM_009362972 |
| PCP016389 | 4,906890596 | 5,260402093 | 4,544114402 | 4,143230135 | PCP016389 | XM_009362946 |
| PCP016430 | 6,528727582 | 6,54951516  | 6,741466986 | 7,300764373 | PCP016430 | XM_009341505 |
| PCP016489 | 6,222456826 | 5,77267747  | 5,736875423 | 4,754887502 |           |              |
| PCP016503 | 6,824386003 | 6,996275749 | 6,653490009 | 6,333960351 | PCP016503 | NM_001293957 |
| PCP016510 | 5,781359714 | 5,222263604 | 5,815831566 | 6,709704193 |           |              |
| PCP016524 | 6,99242856  | 7           | 6,837060204 | 6,414981143 | PCP016524 | XM_009370373 |
| PCP016526 | 6,136068312 | 6,087462841 | 4,874305166 | 4,272769732 | PCP016526 | XM_009370366 |
| PCP016560 | 6,291493053 | 6,828707735 | 6,894817763 | 5,815831566 | PCP016560 | XM_009359364 |
| PCP016565 | 5,222263604 | 4,437627248 | 5,129283017 | 6,321928095 | PCP016565 | XM_018647740 |
| PCP016579 | 5,554588852 | 6,189824559 | 5,196528361 | 4,480911346 | PCP016579 | XM_009352038 |
| PCP016580 | 6,369291982 | 5,709566354 | 6,824386003 | 6,285402219 | PCP016580 | XM_009352054 |
| PCP016600 | 6,54426899  | 6           | 5,781359714 | 6,007419784 | PCP016600 | XM_009353168 |
| PCP016604 | 5,222263604 | 5,196528361 | 6,129283017 | 5,984817174 |           |              |
| PCP016611 | 6,272956308 | 6,459431619 | 6,564835417 | 7,058857621 | PCP016611 | XM_009365844 |
| PCP016621 | 4,790250739 | 5,142821844 | 6,087462841 | 6,309794644 | PCP016621 | XM_009365827 |
| PCP016623 | 6,094447222 | 5,961854808 | 5,824513297 | 5,491853096 | PCP016623 | XM_009365825 |
| PCP016656 | 6,363346321 | 5,874551087 | 6,203005338 | 6,015024705 | PCP016656 | XM_009366590 |
| PCP016718 | 7,06608919  | 6,584962501 | 6,539158811 | 6,007419784 | PCP016718 | XM_009341121 |
| PCP016767 | 6,695854658 | 7,014913158 | 6,878602742 | 6,763809907 | PCP016767 | XM_009350481 |
| PCP016776 | 5,073391816 | 2,414135533 | 5,333781501 | 5,260402093 | PCP016776 | XM_009336194 |
| PCP016856 | 5,115615931 | 5,59484709  | 6,015024705 | 6,426264755 | PCP016856 | XM_008390327 |
| PCP016894 | 6,890811455 | 6,996275749 | 7,033423002 | 6,518377768 | PCP016894 | XM_009377200 |
| PCP016937 | 7,076815597 | 6,475733431 | 6,745909573 | 6,741466986 | PCP016937 | XM_008387102 |
| PCP016999 | 6,058965822 | 6,189824559 | 6,454011343 | 7,17990909  | PCP016999 | XM_008387936 |
| PCP017010 | 6,222456826 | 6,209453366 | 6,087462841 | 5,392317423 | PCP017010 | XM_018648178 |
| PCP017038 | 5,763677142 | 5,798828178 | 5,961854808 | 5,297558281 | PCP017038 | XM_009348078 |
| PCP017056 | 7,375039431 | 7,022367813 | 6,662917555 | 6,31596467  | PCP017056 | XM_008381785 |
| PCP017094 | 6,254178286 | 5,930737338 | 6,403778984 | 6,785681319 | PCP017094 | XM_009353062 |
| PCP017102 | 4,73714592  | 4,718635616 | 5,663059924 | 4,841469999 | PCP017102 | XM_008395264 |
| PCP017205 | 5,380937195 | 4,523561956 | 4,392317423 | 5,333781501 | PCP017205 | XM_009360789 |
| PCP017208 | 5,196528361 | 5,681730355 | 6,189824559 | 6,351734323 | PCP017208 | XM_008361176 |
| PCP017212 | 6,754887502 | 6,497133304 | 6,81159947  | 7,315874125 |           |              |
| PCP017214 | 5,700439718 | 5,48123435  | 5,60496087  | 6,345715709 | PCP017214 | XM_009371554 |
| PCP017238 | 5,369117459 | 4,985044962 | 5,691254979 | 6           | PCP017238 | XM_009342641 |
| PCP017245 | 4,754887502 | 5,746043983 | 5,584962501 | 6,714245518 | PCP017245 | XM_009340139 |
| PCP017328 | 6,910852562 | 7,022367813 | 6,785681319 | 6,750472519 | PCP017328 | XM_008380200 |
| PCP017346 | 6,882643049 | 6,426264755 | 6,380764075 | 5,196528361 | PCP017346 | XM_008350207 |
| PCP017358 | 5,815831566 | 5,321928095 | 5,073391816 | 4,143230135 | PCP017358 | XM_009351347 |
| PCP017391 | 5,961854808 | 6,022367813 | 6,163297449 | 7,321928095 |           |              |
| PCP017403 | 6,380764075 | 6,129283017 | 6,38663853  | 6,922792504 |           |              |
| PCP017415 | 6,22881869  | 5,930737338 | 6,189824559 | 5,718909554 | PCP017415 | XM_009352580 |
| PCP017456 | 4,874305166 | 3,736604875 | 5,491853096 | 4,857980995 |           |              |
| PCP017458 | 5,727920455 | 5,02989455  | 5,437294331 | 4,754887502 | PCP017458 | XM_008371482 |
| PCP017479 | 4,34553831  | 3,906890596 | 4,247927513 | 6,122465658 |           |              |
| PCP017547 | 5,977279923 | 5,882643049 | 6,375039431 | 6,938638658 |           |              |



|           |             |             |             |             |           |              |
|-----------|-------------|-------------|-------------|-------------|-----------|--------------|
| PCP017612 | 6,50255338  | 6,564835417 | 6,72342204  | 7,257387843 | PCP017612 | XM_009362653 |
| PCP017630 | 6,914923239 | 6,183288001 | 6,486553493 | 6,60481265  | PCP017630 | XM_009367865 |
| PCP017645 | 6,029673735 | 5,392317423 | 5,235344128 | 5,415150205 | PCP017645 | XM_009347147 |
| PCP017660 | 7,146390476 | 6,768184325 | 6,183288001 | 6,22881869  | PCP017660 | XM_009378673 |
| PCP017688 | 6,614709844 | 5,914803677 | 5,736875423 | 5,321928095 |           |              |
| PCP017752 | 6,837060204 | 6,677085351 | 6,260590275 | 6,163297449 | PCP017752 | XM_009342554 |
| PCP017765 | 5,874551087 | 5,564683017 | 5,798828178 | 5,183089461 | PCP017765 | XR_527841    |
| PCP017805 | 5,142821844 | 4,95419631  | 4,906890596 | 3,772941338 |           |              |
| PCP017810 | 5,624393382 | 5,906890596 | 6,087462841 | 6,513016928 | PCP017810 | XM_009371463 |
| PCP017870 | 6,72342204  | 6,351734323 | 6,579994693 | 6,22881869  | PCP017870 | XM_008365700 |
| PCP017901 | 6,448405435 | 6,189824559 | 6,375039431 | 6,087462841 | PCP017901 | XR_665800    |
| PCP017912 | 6,03716255  | 5,984817174 | 6,794415866 | 6,475733431 | PCP017912 | XM_009361061 |
| PCP017913 | 5,554588852 | 5,502394256 | 5,727920455 | 4,523561956 | PCP017913 | XM_009360762 |
| PCP017931 | 5,470211457 | 5,841218374 | 5,183089461 | 3,736604875 | PCP017931 | XM_018647567 |
| PCP017969 | 5,403608584 | 5,087462841 | 5,59484709  | 6,667750232 |           |              |
| PCP017984 | 6,357552005 | 5,736875423 | 6,03716255  | 5,874551087 | PCP017984 | XM_008375465 |
| PCP017994 | 5,513174885 | 5,02989455  | 4,906890596 | 4,564987801 | PCP017994 | XM_018650699 |
| PCP018008 | 5,403608584 | 5,513174885 | 6,03716255  | 6,397974049 | PCP018008 | XM_009346786 |
| PCP018030 | 4,480911346 | 4,73714592  | 5,491853096 | 6,094447222 | PCP018030 | XM_009340187 |
| PCP018043 | 4,059182199 | 4,247927513 | 4,95419631  | 5,297558281 | PCP018043 | XM_008342697 |
| PCP018056 | 6,108524457 | 5,992541859 | 5,906890596 | 4,196134881 |           |              |
| PCP018080 | 6,015024705 | 6,369291982 | 6,486553493 | 7,06608919  |           |              |
| PCP018093 | 6,741466986 | 6,475733431 | 6,297741678 | 6,247927513 | PCP018093 | XM_008357860 |
| PCP018095 | 6,297741678 | 5,196528361 | 4,662775172 | 4           | PCP018095 | XM_017332100 |
| PCP018116 | 5,014801602 | 5,653346693 | 5,448570626 | 6,303780748 | PCP018116 | XM_017324188 |
| PCP018117 | 7,153095972 | 6,709704193 | 6,574858391 | 5,513174885 | PCP018117 | XM_009379031 |
| PCP018149 | 3,700439718 | 5,380937195 | 5,849749117 | 5,087462841 | PCP018149 | XM_009359710 |
| PCP018189 | 5,700439718 | 6,662917555 | 6,07317756  | 4,890933022 | PCP018189 | XM_017328830 |
| PCP018200 | 3,502075956 | 5,624393382 | 5,426264755 | 4,059182199 | PCP018200 | XM_017329734 |
| PCP018220 | 6,459431619 | 6,624539604 | 6,969587981 | 7,209453366 | PCP018220 | XM_008380648 |
| PCP018233 | 6,357552005 | 5,681730355 | 6,196331634 | 5,824513297 | PCP018233 | XM_008364236 |
| PCP018251 | 6,309794644 | 6,523561956 | 6,579994693 | 7,022367813 | PCP018251 | XM_008375346 |
| PCP018254 | 5,02989455  | 5,437294331 | 5,513174885 | 6,115407855 |           |              |
| PCP018261 | 6,235152624 | 6,380764075 | 6,403778984 | 5,59484709  |           |              |
| PCP018266 | 6,380764075 | 5,48123435  | 6,022367813 | 5,824513297 | PCP018266 | XM_009370029 |
| PCP018281 | 4,95419631  | 5,345893086 | 6,03716255  | 5,789990019 | PCP018281 | XM_008378971 |
| PCP018283 | 5,663059924 | 6,691115365 | 7,156538193 | 6,64385619  | PCP018283 | XM_008378964 |
| PCP018295 | 6,624539604 | 6,07317756  | 6,737010678 | 6,906890596 | PCP018295 | NM_001328771 |
| PCP018307 | 5,156639311 | 4,906890596 | 5,357552005 | 5,946496941 |           |              |
| PCP018346 | 6,609843592 | 6,464831606 | 6,486553493 | 7,244791942 | PCP018346 | XM_017332212 |
| PCP018389 | 6,815959618 | 6,72342204  | 6,727920455 | 6,03716255  | PCP018389 | XM_009351917 |
| PCP018415 | 5,087462841 | 5,807354922 | 5,672425342 | 4,700439718 | PCP018415 | XM_009369516 |
| PCP018417 | 6,807354922 | 6,882643049 | 6,969587981 | 6,4374608   | PCP018417 | XM_008387906 |
| PCP018446 | 6,513016928 | 6           | 6,303780748 | 6,815959618 | PCP018446 | XM_018650200 |
| PCP018461 | 4,297925053 | 4,772413555 | 5,544423562 | 6,022367813 | PCP018461 | XM_009374372 |
| PCP018465 | 6,50255338  | 6,554588852 | 6,491853096 | 7,21916852  | PCP018465 | XM_009374362 |

|           |             |             |             |             |           |              |
|-----------|-------------|-------------|-------------|-------------|-----------|--------------|
| PCP018479 | 5,914803677 | 6,691115365 | 6,163297449 | 6,291493053 | PCP018479 | XM_009339525 |
| PCP018482 | 4,700439718 | 5,789990019 | 5,087462841 | 5,533874777 | PCP018482 | XM_009339521 |
| PCP018486 | 6,222456826 | 6,345715709 | 6,589913261 | 7,044394119 | PCP018486 | XM_009339509 |
| PCP018518 | 6,459431619 | 6,559644763 | 5,718909554 | 5,129283017 | PCP018518 | XM_009349645 |
| PCP018572 | 5,584962501 | 6,058965822 | 6,922792504 | 7,437377568 | PCP018572 | XM_008346511 |
| PCP018573 | 6,518377768 | 6,815959618 | 6,700439718 | 6,345715709 | PCP018573 | XM_008355111 |
| PCP018586 | 7,42063398  | 7,392317423 | 7,080337882 | 5,273142859 | PCP018586 | XM_008379381 |
| PCP018589 | 5,781359714 | 5,101397952 | 5,285402219 | 4,969472865 | PCP018589 | XM_009350157 |
| PCP018708 | 7,855927425 | 7,567347696 | 5,890689878 | 0           |           |              |
| PCP018727 | 5,977279923 | 5,222263604 | 5,357552005 | 5,196528361 | PCP018727 | XM_009336299 |
| PCP018735 | 4,682011391 | 4,624685811 | 5,815831566 | 5,183089461 | PCP018735 | XM_009367141 |
| PCP018762 | 6,589913261 | 6,737010678 | 6,363346321 | 7,276124405 |           |              |
| PCP018764 | 5,533874777 | 5,448570626 | 5,898933872 | 6,279285561 |           |              |
| PCP018777 | 4,906890596 | 4,841469999 | 6,589913261 | 4,790250739 | PCP018777 | XM_009347948 |
| PCP018815 | 6,369291982 | 6,579994693 | 6,357552005 | 6,189824559 | PCP018815 | XM_018644856 |
| PCP018822 | 3,874796966 | 4,700439718 | 4,624685811 | 5,824513297 | PCP018822 | XM_009347695 |
| PCP018848 | 5,849749117 | 5,807354922 | 5,459431619 | 3,221877081 | PCP018848 | XM_009372955 |
| PCP018892 | 6,115407855 | 6,47037417  | 6,890811455 | 7,730164413 | PCP018892 | XM_021962715 |
| PCP018907 | 6,464831606 | 6,029673735 | 6,029673735 | 5,709566354 | PCP018907 | XM_009340404 |
| PCP018923 | 5,709566354 | 5,663059924 | 5,544423562 | 4,73714592  |           |              |
| PCP018934 | 6,475733431 | 6,403778984 | 6,539158811 | 7,139551352 | PCP018934 | XM_017335483 |
| PCP019005 | 6,087462841 | 6,189824559 | 5,866166169 | 5,533874777 | PCP019005 | XM_018642689 |
| PCP019013 | 5,357552005 | 5,073391816 | 4,857980995 | 4,584962501 | PCP019013 | XM_008381440 |
| PCP019029 | 4,985044962 | 5,142821844 | 4,700439718 | 4,143230135 | PCP019029 | XM_009375083 |
| PCP019046 | 6,101608059 | 5,502394256 | 4,564987801 | 3,840966704 |           |              |
| PCP019056 | 6,60481265  | 5,866166169 | 5,746043983 | 5,470211457 | PCP019056 | XM_009379818 |
| PCP019099 | 6,741466986 | 6,380764075 | 6,431790083 | 6,24164954  | PCP019099 | XM_017326897 |
| PCP019152 | 5,235344128 | 5,513174885 | 5,961854808 | 6,431790083 | PCP019152 | XM_009358194 |
| PCP019153 | 5,890689878 | 5,95419631  | 5,890689878 | 6,781359714 | PCP019153 | XM_008394899 |
| PCP019159 | 4,938756261 | 5,345893086 | 5,403608584 | 5,890689878 |           |              |
| PCP019167 | 6,50255338  | 6,64385619  | 6,824386003 | 6,357552005 | PCP019167 | XM_018643495 |
| PCP019179 | 6,574858391 | 6,614709844 | 6,579994693 | 6,297741678 | PCP019179 | XR_667777    |
| PCP019232 | 6,409390936 | 5,898933872 | 6,285402219 | 5,48123435  | PCP019232 | XM_009366464 |
| PCP019274 | 6,247927513 | 6,080444483 | 6,24164954  | 7,619633096 |           |              |
| PCP019284 | 6,614709844 | 6,272956308 | 6,559644763 | 5,930737338 | PCP019284 | XR_669877    |
| PCP019288 | 7,058857621 | 6,285402219 | 6,906890596 | 6,54951516  | PCP019288 | XM_009377443 |
| PCP019325 | 6,022367813 | 6,448405435 | 6,554588852 | 5,95419631  |           |              |
| PCP019370 | 5,222263604 | 4,087462841 | 4,700439718 | 4,196134881 |           |              |
| PCP019419 | 7,06608919  | 6,599912842 | 6,798698597 | 6,718772592 | PCP019419 | XM_018651633 |
| PCP019439 | 6,094447222 | 5,736875423 | 6,486553493 | 5,437294331 | PCP019439 | XM_009339493 |
| PCP019467 | 5,977279923 | 5,824513297 | 5,297558281 | 4,272769732 | PCP019467 | XM_009338875 |
| PCP019487 | 4,700439718 | 5,718909554 | 5,691254979 | 6,254178286 | PCP019487 | XM_009377658 |
| PCP019498 | 5,222263604 | 4,297925053 | 4,772413555 | 6,183288001 | PCP019498 | XM_009377638 |
| PCP019506 | 6,303780748 | 6,07317756  | 6,07317756  | 5,857980995 | PCP019506 | XM_009377627 |
| PCP019526 | 6,080444483 | 6,087462841 | 6,007419784 | 5,426264755 | PCP019526 | XM_008378877 |
| PCP019562 | 7,193081765 | 6,614709844 | 6,196331634 | 6,136068312 | PCP019562 | XM_008228004 |

|           |             |             |             |             |           |              |
|-----------|-------------|-------------|-------------|-------------|-----------|--------------|
| PCP019571 | 4,807354922 | 5,392317423 | 5,369117459 | 4,502712486 | PCP019571 | XM_009372476 |
| PCP019583 | 4,700439718 | 4,087462841 | 6,303780748 | 5,345893086 | PCP019583 | XM_018649082 |
| PCP019586 | 4,480911346 | 4,985044962 | 5,459431619 | 5,815831566 | PCP019586 | XM_009365729 |
| PCP019597 | 6,339850003 | 6,72342204  | 7,007531912 | 7,06608919  | PCP019597 | XM_018649078 |
| PCP019602 | 6,189824559 | 6,619559738 | 6,68187088  | 7,30679083  | PCP019602 | XM_009364313 |
| PCP019631 | 6,60481265  | 5,922911406 | 6,392317423 | 6,333960351 | PCP019631 | XM_009339576 |
| PCP019640 | 6,648609245 | 6,750472519 | 7,094552786 | 6,14974712  | PCP019640 | XM_009339558 |
| PCP019653 | 6,50255338  | 6,667750232 | 6,599912842 | 6,309794644 | PCP019653 | XM_008370512 |
| PCP019661 | 5,984817174 | 6,080444483 | 5,653346693 | 5,64385619  | PCP019661 | XM_009380677 |
| PCP019671 | 4,682011391 | 4,807354922 | 5,285402219 | 5,984817174 |           |              |
| PCP019682 | 6,534030467 | 6,266786541 | 6,266786541 | 5,321928095 | PCP019682 | XM_009357525 |
| PCP019692 | 6,266786541 | 5,930737338 | 5,849749117 | 5,584962501 | PCP019692 | XM_009357814 |
| PCP019734 | 6,222456826 | 6,03716255  | 5,992541859 | 5,64385619  | PCP019734 | XM_009368775 |
| PCP019752 | 5,866166169 | 5,634302842 | 5,392317423 | 5,380937195 | PCP019752 | XM_009349019 |
| PCP019776 | 6,518377768 | 6,4374608   | 5,824513297 | 5,260402093 | PCP019776 | XM_018646688 |
| PCP019791 | 6,31596467  | 6,564835417 | 6,874428132 | 7,564759219 | PCP019791 | XM_009354616 |
| PCP019799 | 6,882643049 | 6,247927513 | 6,727920455 | 7,238404739 | PCP019799 | XM_009354637 |
| PCP019809 | 6,115407855 | 5,930737338 | 5,437294331 | 2,939226578 | PCP019809 | XM_008379467 |
| PCP019829 | 4,564987801 | 5,832890014 | 6,554588852 | 8,17990909  | PCP019829 | XM_009335625 |
| PCP019871 | 4,459431619 | 4,874305166 | 4,95419631  | 5,815831566 | PCP019871 | XM_009380423 |
| PCP019872 | 6,07317756  | 5,297558281 | 5,169925001 | 4,480911346 | PCP019872 | XM_016795453 |
| PCP019876 | 5,718909554 | 5,64385619  | 5,807354922 | 6,837060204 |           |              |
| PCP019878 | 5,169925001 | 4,624685811 | 5,142821844 | 5,992541859 | PCP019878 | XM_009368981 |
| PCP019888 | 5,459431619 | 5,691254979 | 6,029673735 | 6,420718183 | PCP019888 | XM_009368964 |
| PCP019939 | 3,368768349 | 5,073391816 | 5,77267747  | 4,544114402 | PCP019939 | XM_008344425 |
| PCP019976 | 6,136068312 | 5,95419631  | 6,108524457 | 5,523561956 | PCP019976 | XM_009374638 |
| PCP020013 | 5,984817174 | 6,156437068 | 6,321928095 | 5,624393382 | PCP020013 | XM_009355599 |
| PCP020038 | 6,051589621 | 6,486553493 | 6,785681319 | 7,599912842 | PCP020038 | XM_009345977 |
| PCP020045 | 6,369291982 | 5,754887502 | 5,754887502 | 5,922911406 |           |              |
| PCP020062 | 6,051589621 | 5,890689878 | 5,502394256 | 5,044394119 | PCP020062 | XM_008353642 |
| PCP020074 | 5,502394256 | 5,357552005 | 5,624393382 | 4,922673593 | PCP020074 | XM_009355941 |
| PCP020075 | 6,03716255  | 5,914803677 | 5,930737338 | 5,345893086 | PCP020075 | XM_008344599 |
| PCP020083 | 5,115615931 | 5,073391816 | 5,044394119 | 6,442943496 | PCP020083 | XM_009356626 |
| PCP020084 | 5,415150205 | 5,502394256 | 6,169925001 | 6,260590275 | PCP020084 | XM_009356626 |
| PCP020091 | 4,369466484 | 5,523561956 | 6,143026004 | 7,924812504 | PCP020091 | XM_009360209 |
| PCP020097 | 6,662917555 | 6,339850003 | 7,055282436 | 6,044394119 | PCP020097 | XM_008374811 |
| PCP020135 | 6,662917555 | 6,569855608 | 6,84962403  | 7,212666605 | PCP020135 | XM_009355405 |
| PCP020178 | 5,101397952 | 5,156639311 | 5,533874777 | 6,080444483 | PCP020178 | XM_017334067 |
| PCP020200 | 5,874551087 | 6,087462841 | 6,254178286 | 5,672425342 | PCP020200 | XM_009366524 |
| PCP020216 | 5,247927513 | 4,922673593 | 4,790250739 | 4,143230135 | PCP020216 | XM_018649094 |
| PCP020217 | 5,77267747  | 5,789990019 | 5,691254979 | 5,209453366 | PCP020217 | XM_008395894 |
| PCP020273 | 6,156437068 | 5,781359714 | 6,22881869  | 5,357552005 | PCP020273 | XM_009344352 |
| PCP020280 | 4,64385619  | 4,807354922 | 5,824513297 | 5,95419631  | PCP020280 | XM_009347498 |
| PCP020326 | 6,539158811 | 6,853870927 | 6,727920455 | 7,231989133 |           |              |
| PCP020345 | 4,922673593 | 5,969703088 | 5,969703088 | 6,272956308 | PCP020345 | XM_018646938 |
| PCP020363 | 6,497133304 | 5,914803677 | 6,272956308 | 6,044394119 | PCP020363 | XM_021954646 |

|           |             |             |             |             |           |              |
|-----------|-------------|-------------|-------------|-------------|-----------|--------------|
| PCP020371 | 5,058749412 | 5,681730355 | 4,985044962 | 4,604664415 |           |              |
| PCP020379 | 5,554588852 | 5,718909554 | 6,007419784 | 6,380764075 | PCP020379 | XM_009360513 |
| PCP020402 | 5,849749117 | 5,073391816 | 4,272769732 | 4,95419631  | PCP020402 | XM_009364652 |
| PCP020412 | 5,807354922 | 5,196528361 | 5,073391816 | 4,922673593 | PCP020412 | XM_009355334 |
| PCP020418 | 6,86628983  | 6,203005338 | 6,196331634 | 6,266786541 | PCP020418 | XM_009355339 |
| PCP020429 | 6,143026004 | 6,380764075 | 6,653490009 | 7,153095972 | PCP020429 | XM_008351666 |
| PCP020434 | 6,619559738 | 6,4374608   | 7,007531912 | 4,480911346 | PCP020434 | XM_018644728 |
| PCP020444 | 6,584962501 | 6,890811455 | 6,772545519 | 6,648609245 | PCP020444 | XM_009380452 |
| PCP020458 | 6,38663853  | 6,763809907 | 6,86628983  | 7,055282436 | PCP020458 | XM_009374044 |
| PCP020495 | 6,327866971 | 6,454011343 | 6,209453366 | 5,392317423 | PCP020495 | XM_009361690 |
| PCP020505 | 6,235152624 | 6,677085351 | 6,824386003 | 7,459431619 |           |              |
| PCP020507 | 5,437294331 | 5,849749117 | 5,736875423 | 6,431790083 | PCP020507 | XM_009361523 |
| PCP020543 | 4,459431619 | 4,247927513 | 5,746043983 | 4,985044962 | PCP020543 | XM_009355648 |
| PCP020562 | 6,309794644 | 6,732404887 | 6,81159947  | 7,115511897 | PCP020562 | XM_009344480 |
| PCP020573 | 5,273142859 | 5,02989455  | 5,260402093 | 6,163297449 | PCP020573 | XM_009362738 |
| PCP020605 | 6,14974712  | 5,564683017 | 6,369291982 | 6,203005338 | PCP020605 | XM_018643934 |
| PCP020618 | 6,189824559 | 6,143026004 | 5,849749117 | 5,403608584 | PCP020618 | XM_008352169 |
| PCP020646 | 6,087462841 | 6,169925001 | 6,087462841 | 5,60496087  | PCP020646 | XM_009369010 |
| PCP020651 | 5,718909554 | 5,222263604 | 4,824258697 | 4,502712486 |           |              |
| PCP020668 | 5,380937195 | 5,044394119 | 5,02989455  | 4,34553831  | PCP020668 | XM_008391740 |
| PCP020692 | 5,357552005 | 4,857980995 | 4,790250739 | 4,624685811 |           |              |
| PCP020731 | 6,790120385 | 6,906890596 | 6,984931073 | 6,564835417 | PCP020731 | XM_009352840 |
| PCP020748 | 4,34553831  | 4,502712486 | 4,662775172 | 5,898933872 |           |              |
| PCP020891 | 6,589913261 | 6,528727582 | 6,845490051 | 7,199672345 | PCP020891 | XM_009376246 |
| PCP020896 | 5,297558281 | 4,790250739 | 4,922673593 | 4,247927513 | PCP020896 | XM_018651493 |
| PCP020900 | 6,189824559 | 6,309794644 | 5,977279923 | 5,653346693 | PCP020900 | XM_009374470 |
| PCP020932 | 7,062531903 | 6,459431619 | 6,754887502 | 5,798828178 | PCP020932 | XM_008368738 |
| PCP020937 | 5,718909554 | 4,700439718 | 5,333781501 | 5,321928095 | PCP020937 | XM_021955708 |
| PCP020945 | 6,203005338 | 6,051589621 | 6,07317756  | 5,544423562 | PCP020945 | XM_008352593 |
| PCP020973 | 5           | 5,073391816 | 5,544423562 | 6,403778984 | PCP020973 | XM_008390892 |
| PCP021016 | 5,544423562 | 5,209453366 | 4,857980995 | 4,414812061 | PCP021016 | XM_009359727 |
| PCP021021 | 4,297925053 | 5,554588852 | 5,763677142 | 5           | PCP021021 | XM_009353199 |
| PCP021025 | 6,426264755 | 5,754887502 | 5,369117459 | 5,470211457 | PCP021025 | XM_009353216 |
| PCP021026 | 5,345893086 | 5,491853096 | 5,321928095 | 4,624685811 | PCP021026 | XM_008341317 |
| PCP021028 | 6,559644763 | 5,653346693 | 5,866166169 | 5,961854808 | PCP021028 | XM_009353218 |
| PCP021040 | 5,142821844 | 5,403608584 | 5,309976492 | 6,058965822 |           |              |
| PCP021057 | 6,442943496 | 6,24164954  | 5,437294331 | 4,169925001 | PCP021057 | XM_009337903 |
| PCP021059 | 5,415150205 | 4,604664415 | 4,564987801 | 4,662775172 |           |              |
| PCP021087 | 6,50255338  | 6,486553493 | 6,609843592 | 7,285402219 | PCP021087 | XM_009356672 |
| PCP021094 | 6,254178286 | 6,136068312 | 6,235152624 | 6,946379968 | PCP021094 | XR_667060    |
| PCP021114 | 6,513016928 | 6,07317756  | 6           | 7,609769734 | PCP021114 | XM_009365486 |
| PCP021129 | 6,481072857 | 5,961854808 | 5,763677142 | 5,922911406 | PCP021129 | XM_018649034 |
| PCP021138 | 5,169925001 | 5,624393382 | 5,273142859 | 4,890933022 | PCP021138 | XM_009365607 |
| PCP021188 | 6,754887502 | 7,132679654 | 6,80309785  | 6,768184325 |           |              |
| PCP021214 | 4,772413555 | 5,285402219 | 5,513174885 | 3,624100895 | PCP021214 | XM_008389126 |
| PCP021232 | 6,539158811 | 6,375039431 | 6,594996337 | 7,30679083  |           |              |

|           |             |             |             |             |           |              |
|-----------|-------------|-------------|-------------|-------------|-----------|--------------|
| PCP021233 | 4,247927513 | 3,624100895 | 4,754887502 | 5,857980995 | PCP021233 | XM_009353735 |
| PCP021240 | 5,357552005 | 5,523561956 | 6,03716255  | 6,454011343 | PCP021240 | XM_009355251 |
| PCP021254 | 6,50255338  | 6,50779464  | 6,272956308 | 5,815831566 | PCP021254 | XM_017332056 |
| PCP021262 | 6,143026004 | 6,297741678 | 6,291493053 | 5,930737338 | PCP021262 | XM_017332464 |
| PCP021267 | 5,285402219 | 5,101397952 | 5,763677142 | 6,285402219 | PCP021267 | XM_017323466 |
| PCP021315 | 6,599912842 | 6,47037417  | 6,327866971 | 6,203005338 | PCP021315 | XM_009345531 |
| PCP021335 | 5,183089461 | 5,101397952 | 3,906890596 | 4,584962501 | PCP021335 | XM_018644639 |
| PCP021359 | 6,60481265  | 6,64385619  | 6,914923239 | 6,414981143 |           |              |
| PCP021406 | 5,321928095 | 5,938521046 | 6,718772592 | 7,193081765 | PCP021406 | XM_021962869 |
| PCP021411 | 6,351734323 | 5,415150205 | 5,938521046 | 6,351734323 | PCP021411 | XM_009346004 |
| PCP021442 | 5,533874777 | 5,57500972  | 5,523561956 | 4,969472865 | PCP021442 | XM_018646325 |
| PCP021489 | 6,910852562 | 6,051589621 | 6,619559738 | 4,754887502 | PCP021489 | XM_009372341 |
| PCP021495 | 5,357552005 | 5,48123435  | 5,95419631  | 5,273142859 |           |              |
| PCP021498 | 5,634302842 | 5,64385619  | 6,163297449 | 6,832890014 | PCP021498 | XM_009372231 |
| PCP021507 | 5,513174885 | 5,849749117 | 6,03716255  | 6,634157606 | PCP021507 | XM_009373866 |
| PCP021509 | 6,272956308 | 6,624539604 | 6,564835417 | 6,996275749 | PCP021509 | XM_018650518 |
| PCP021515 | 6,634157606 | 6,965784285 | 6,988684687 | 6,539158811 | PCP021515 | XM_009341165 |
| PCP021558 | 6,47037417  | 7,415065677 | 6,768184325 | 6,420718183 | PCP021558 | XM_009375376 |
| PCP021569 | 6,136068312 | 6,260590275 | 6,163297449 | 5,653346693 | PCP021569 | XM_017333412 |
| PCP021575 | 6,101608059 | 6,518377768 | 6,662917555 | 4,969472865 | PCP021575 | XM_009369023 |
| PCP021587 | 6,044394119 | 5,415150205 | 5,59484709  | 5,285402219 | PCP021587 | XM_008338702 |
| PCP021594 | 5,321928095 | 4,523561956 | 5,235344128 | 6,189824559 | PCP021594 | XM_009340150 |
| PCP021603 | 4,700439718 | 4,584962501 | 5,115615931 | 5,663059924 | PCP021603 | XM_009349013 |
| PCP021630 | 5,235344128 | 5,653346693 | 5,415150205 | 6,339850003 |           |              |
| PCP021653 | 4,297925053 | 4,34553831  | 5,523561956 | 4,604664415 | PCP021653 | XM_008349028 |
| PCP021689 | 3,840966704 | 4,272769732 | 4,985044962 | 5,142821844 | PCP021689 | XM_008351242 |
| PCP021749 | 6,260590275 | 5,930737338 | 5,874551087 | 5,544423562 |           |              |
| PCP021751 | 6,14974712  | 6,196331634 | 6,486553493 | 6,926829678 | PCP021751 | XM_009358826 |
| PCP021754 | 5,922911406 | 6,497133304 | 6,86628983  | 7,159871337 | PCP021754 | XM_009374734 |
| PCP021761 | 6,321928095 | 6,369291982 | 6,634157606 | 7,115511897 | PCP021761 | XM_009359987 |
| PCP021784 | 5,273142859 | 4,662775172 | 4,564987801 | 3,969933275 | PCP021784 | XM_008361015 |
| PCP021834 | 5,297558281 | 4,922673593 | 5,247927513 | 5,977279923 |           |              |
| PCP021908 | 6,961970533 | 6,574858391 | 6,750472519 | 6,403778984 | PCP021908 | XM_009337197 |
| PCP021940 | 6,209453366 | 5,247927513 | 6,122465658 | 6,363346321 | PCP021940 | XM_009381365 |
| PCP021965 | 6,569855608 | 6,54951516  | 6,890811455 | 7,333870928 | PCP021965 | XM_009349424 |
| PCP021976 | 3,502075956 | 5,222263604 | 5,014801602 | 6,351734323 |           |              |
| PCP021985 | 5,235344128 | 5,614709844 | 6,475733431 | 9,19640541  | PCP021985 | XM_018643952 |
| PCP021996 | 6,68187088  | 6,196331634 | 7,294620749 | 6,022367813 |           |              |
| PCP022025 | 5,890689878 | 5,459431619 | 6,03716255  | 6,768184325 |           |              |
| PCP022029 | 5,672425342 | 5,183089461 | 5,247927513 | 4,718635616 |           |              |
| PCP022071 | 5,470211457 | 5,763677142 | 7,076815597 | 6,163297449 | PCP022071 | XM_009359856 |
| PCP022126 | 3,624100895 | 4,414812061 | 4,772413555 | 5,48123435  |           |              |
| PCP022129 | 5,866166169 | 6,327866971 | 6,475733431 | 7,209453366 | PCP022129 | XM_009354771 |
| PCP022142 | 5,64385619  | 5,789990019 | 6,094447222 | 6,653490009 | PCP022142 | XM_008385757 |
| PCP022146 | 6,06608919  | 5,866166169 | 6,491853096 | 5,297558281 | PCP022146 | XM_009353044 |
| PCP022157 | 5,533874777 | 7,055282436 | 4,087462841 | 4,700439718 |           |              |

|           |             |             |             |             |           |              |
|-----------|-------------|-------------|-------------|-------------|-----------|--------------|
| PCP022169 | 5,718909554 | 5,273142859 | 4,437627248 | 5,115615931 | PCP022169 | XM_009352986 |
| PCP022181 | 4,790250739 | 5,235344128 | 6,14974712  | 6,203005338 |           |              |
| PCP022194 | 5,247927513 | 5,491853096 | 5,260402093 | 4,682011391 |           |              |
| PCP022198 | 5,77267747  | 6,254178286 | 6,06608919  | 5,763677142 |           |              |
| PCP022221 | 4,790250739 | 4,73714592  | 5,285402219 | 4,34553831  | PCP022221 | XM_017327504 |
| PCP022267 | 6,984931073 | 6,781359714 | 6,930737338 | 6,72342204  | PCP022267 | XM_009367376 |
| PCP022273 | 5,906890596 | 5,437294331 | 6,333960351 | 6,209453366 | PCP022273 | XM_009368142 |
| PCP022283 | 4,682011391 | 4,95419631  | 6,203005338 | 5,736875423 | PCP022283 | XM_009344371 |
| PCP022288 | 6,745909573 | 6,667750232 | 6,841344192 | 6,339850003 |           |              |
| PCP022315 | 6,781359714 | 6,528727582 | 6,266786541 | 6,129283017 | PCP022315 | XM_008340531 |
| PCP022326 | 5,754887502 | 5,663059924 | 5,169925001 | 4,059182199 | PCP022326 | XM_018643085 |
| PCP022442 | 6,491853096 | 6,497133304 | 6,832890014 | 7,406587689 | PCP022442 | XM_009354301 |
| PCP022447 | 5,222263604 | 5,044394119 | 6,97349648  | 5,403608584 | PCP022447 | XM_009347943 |
| PCP022460 | 5,02989455  | 5,101397952 | 5,584962501 | 4,584962501 | PCP022460 | XM_009366467 |
| PCP022495 | 5,691254979 | 6,351734323 | 7,044394119 | 6,950351762 |           |              |
| PCP022521 | 5,857980995 | 5,235344128 | 6,080444483 | 6,363346321 | PCP022521 | XM_009343098 |
| PCP022529 | 5,196528361 | 5,129283017 | 5,380937195 | 4,297925053 | PCP022529 | XM_018646906 |
| PCP022538 | 4,544114402 | 3,969933275 | 4,890933022 | 5,513174885 | PCP022538 | XM_009355509 |
| PCP022572 | 5,554588852 | 6,080444483 | 6,156437068 | 6,934634441 |           |              |
| PCP022591 | 5,746043983 | 4,906890596 | 5,222263604 | 4,73714592  | PCP022591 | XM_009337304 |
| PCP022612 | 5,984817174 | 6,169925001 | 6,357552005 | 6,969587981 | PCP022612 | XM_009337543 |
| PCP022636 | 5,95419631  | 6,122465658 | 6,254178286 | 6,930737338 | PCP022636 | XM_009357103 |
| PCP022657 | 5,874551087 | 5,369117459 | 5,906890596 | 5,285402219 | PCP022657 | XM_009357061 |
| PCP022679 | 6,143026004 | 5,938521046 | 6           | 6,732404887 |           |              |
| PCP022692 | 6,044394119 | 5,746043983 | 5,95419631  | 5,533874777 | PCP022692 | XM_009379773 |
| PCP022696 | 7,047996356 | 7,062531903 | 6,639087423 | 6,599912842 | PCP022696 | XM_009379782 |
| PCP022720 | 6,115407855 | 5,491853096 | 5,849749117 | 4,297925053 |           |              |
| PCP022730 | 6,122465658 | 5,691254979 | 6,345715709 | 6,574858391 | PCP022730 | XM_018652374 |
| PCP022771 | 6,950351762 | 6,189824559 | 6,910852562 | 6,291493053 | PCP022771 | XM_008388188 |
| PCP022813 | 6,22881869  | 4,969472865 | 5,513174885 | 5,222263604 | PCP022813 | XM_009367767 |
| PCP022815 | 6,176522247 | 6,06608919  | 5,906890596 | 4,841469999 | PCP022815 | XM_009367762 |
| PCP022849 | 7,303780748 | 6,961970533 | 6,667750232 | 6,454011343 | PCP022849 | XM_008383645 |
| PCP022875 | 5,977279923 | 6,196331634 | 5,60496087  | 5,736875423 | PCP022875 | XM_009352437 |
| PCP022883 | 6,339850003 | 6,22881869  | 6,614709844 | 6,988684687 |           |              |
| PCP022897 | 5,653346693 | 6,594996337 | 7,727920455 | 6,853870927 | PCP022897 | XM_009368026 |
| PCP022903 | 4,700439718 | 7,609769734 | 5,815831566 | 8,194756854 | PCP022903 | XM_008375899 |
| PCP022909 | 4,321928095 | 4,34553831  | 4,985044962 | 6,528727582 | PCP022909 | XM_008375895 |
| PCP022910 | 5,824513297 | 5,247927513 | 6,03716255  | 7,176621973 | PCP022910 | XM_009360427 |
| PCP022911 | 3,840966704 | 4,437627248 | 4,754887502 | 5,746043983 | PCP022911 | XM_009360425 |
| PCP022920 | 6,156437068 | 6,087462841 | 6,54426899  | 7,523561956 | PCP022920 | XM_008380338 |
| PCP022925 | 4,502712486 | 5,115615931 | 5,48123435  | 6,497133304 | PCP022925 | XM_008380413 |
| PCP022967 | 5,285402219 | 5,60496087  | 4,502712486 | 3,906890596 | PCP022967 | XM_008358112 |
| PCP022990 | 5,448570626 | 5,073391816 | 5,087462841 | 3,840966704 | PCP022990 | XM_009368087 |
| PCP023036 | 4,95419631  | 4,772413555 | 5           | 6,080444483 |           |              |
| PCP023062 | 5,115615931 | 5,222263604 | 4,564987801 | 4,222650022 | PCP023062 | XM_008355791 |
| PCP023070 | 6,07317756  | 5,874551087 | 6,235152624 | 5,448570626 |           |              |

|           |             |             |             |             |           |              |
|-----------|-------------|-------------|-------------|-------------|-----------|--------------|
| PCP023088 | 5,841218374 | 5,513174885 | 5,513174885 | 4,874305166 | PCP023088 | XM_009365048 |
| PCP023105 | 6,215872703 | 6,129283017 | 6,950351762 | 5,977279923 | PCP023105 | XM_009343683 |
| PCP023125 | 6,247927513 | 5,426264755 | 5,634302842 | 5,961854808 | PCP023125 | XM_017325084 |
| PCP023209 | 5,691254979 | 5,502394256 | 5,663059924 | 5,058749412 | PCP023209 | XM_009363220 |
| PCP023217 | 7,029784146 | 6,50255338  | 6,513016928 | 6,745909573 | PCP023217 | XM_021956024 |
| PCP023226 | 6,235152624 | 6,31596467  | 6,426264755 | 7,069637728 |           |              |
| PCP023253 | 5,014801602 | 5,672425342 | 5,345893086 | 3,321928095 | PCP023253 | XM_009354140 |
| PCP023256 | 6,579994693 | 6,574858391 | 6,539158811 | 6,176522247 | PCP023256 | XM_008368675 |
| PCP023275 | 6,303780748 | 6,491853096 | 6,574858391 | 6,044394119 |           |              |
| PCP023290 | 5,345893086 | 4,890933022 | 5,222263604 | 4,196134881 |           |              |
| PCP023293 | 5,653346693 | 5,297558281 | 4,95419631  | 4,682011391 | PCP023293 | XM_009359100 |
| PCP023328 | 5,183089461 | 5,584962501 | 6,03716255  | 5,459431619 | PCP023328 | XM_008362183 |
| PCP023339 | 3,772941338 | 3,736604875 | 5,235344128 | 6,115407855 | PCP023339 | XM_009361197 |
| PCP023349 | 6,129283017 | 5,77267747  | 5,832890014 | 5,196528361 | PCP023349 | XM_009364070 |
| PCP023367 | 5,727920455 | 5,533874777 | 6,058965822 | 6,961970533 | PCP023367 | XM_009373527 |
| PCP023373 | 5,297558281 | 5,564683017 | 5,129283017 | 3,624100895 | PCP023373 | NM_001302325 |
| PCP023378 | 6,732404887 | 6,718772592 | 6,72342204  | 6,345715709 | PCP023378 | XM_008372624 |
| PCP023393 | 6,442943496 | 6           | 6,203005338 | 5,736875423 | PCP023393 | XM_009374186 |
| PCP023425 | 6,31596467  | 6,143026004 | 5,754887502 | 5,922911406 | PCP023425 | XM_018647818 |
| PCP023445 | 6,837060204 | 6,853870927 | 6,599912842 | 6,497133304 |           |              |
| PCP023455 | 5,807354922 | 5,59484709  | 4,807354922 | 4,584962501 |           |              |
| PCP023468 | 6,513016928 | 6,351734323 | 6,609843592 | 7,212666605 | PCP023468 | XM_018647103 |
| PCP023511 | 6,369291982 | 6,497133304 | 6,574858391 | 7,058857621 | PCP023511 | XM_009380788 |
| PCP023530 | 6           | 5,727920455 | 5,437294331 | 4,985044962 | PCP023530 | XM_017327706 |
| PCP023532 | 2,414135533 | 7,235248379 | 5,222263604 | 6,31596467  | PCP023532 | XM_008343808 |
| PCP023537 | 6,741466986 | 6,266786541 | 6,129283017 | 6,029673735 | PCP023537 | NM_001328727 |
| PCP023549 | 6,087462841 | 6,115407855 | 6,015024705 | 5,672425342 | PCP023549 | XM_009349145 |
| PCP023554 | 6,54426899  | 6,392317423 | 6,087462841 | 5,946496941 | PCP023554 | XM_008362482 |
| PCP023561 | 4,95419631  | 4,564987801 | 5,02989455  | 5,746043983 | PCP023561 | XM_018650343 |
| PCP023564 | 6,528727582 | 6,380764075 | 6,727920455 | 7,215969746 | PCP023564 | XM_009371430 |
| PCP023586 | 6,369291982 | 6,285402219 | 6,203005338 | 5,754887502 | PCP023586 | XM_008353427 |
| PCP023644 | 4,874305166 | 5,415150205 | 5,930737338 | 5,663059924 | PCP023644 | XM_009335634 |
| PCP023647 | 5,672425342 | 5,969703088 | 6,087462841 | 6,564835417 | PCP023647 | XM_009345580 |
| PCP023681 | 5,663059924 | 6,129283017 | 5,890689878 | 5,718909554 |           |              |
| PCP023720 | 5,789990019 | 5,48123435  | 5,564683017 | 4,807354922 | PCP023720 | XM_018648609 |
| PCP023725 | 5,922911406 | 5,691254979 | 5,815831566 | 4,938756261 | PCP023725 | XM_009356310 |
| PCP023750 | 4,807354922 | 4,64385619  | 6,486553493 | 5,736875423 | PCP023750 | XM_009344693 |
| PCP023759 | 5,513174885 | 4,906890596 | 4,34553831  | 4,196134881 | PCP023759 | XM_017335293 |
| PCP023788 | 7,636624621 | 6,31596467  | 6,260590275 | 6,14974712  | PCP023788 | NM_001328792 |
| PCP023802 | 6,297741678 | 6,327866971 | 6,235152624 | 5,95419631  |           |              |
| PCP023818 | 6,426264755 | 6,087462841 | 6,115407855 | 5,564683017 | PCP023818 | XM_009374903 |
| PCP023836 | 5,222263604 | 5,533874777 | 5,653346693 | 6,380764075 |           |              |
| PCP023912 | 6,857980995 | 6,559644763 | 6,058965822 | 6,464831606 |           |              |
| PCP023920 | 3,874796966 | 4,437627248 | 4,73714592  | 5,584962501 |           |              |
| PCP023941 | 6,54426899  | 6,303780748 | 6,029673735 | 5,129283017 | PCP023941 | XM_018651292 |
| PCP023958 | 5,101397952 | 5,977279923 | 6,375039431 | 6,203005338 |           |              |

|           |             |             |             |             |           |              |
|-----------|-------------|-------------|-------------|-------------|-----------|--------------|
| PCP023980 | 5,969703088 | 5,044394119 | 4,584962501 | 4,584962501 | PCP023980 | XM_009341151 |
| PCP023989 | 5,64385619  | 5,874551087 | 6,303780748 | 6,624539604 |           |              |
| PCP024006 | 4,272769732 | 5,297558281 | 5,727920455 | 4,841469999 | PCP024006 | XM_009336749 |
| PCP024112 | 6,614709844 | 6,4374608   | 6,62935662  | 6,203005338 | PCP024112 | XM_009368427 |
| PCP024113 | 5,634302842 | 5,321928095 | 5,273142859 | 6,115407855 | PCP024113 | XM_009368445 |
| PCP024156 | 6,345715709 | 6,403778984 | 6,50255338  | 7,440204752 | PCP024156 | XM_009345003 |
| PCP024159 | 6,14974712  | 6           | 6,169925001 | 5,614709844 | PCP024159 | XM_008355502 |
| PCP024172 | 6,108524457 | 5,672425342 | 5,938521046 | 5,196528361 |           |              |
| PCP024202 | 5,142821844 | 5,815831566 | 5,841218374 | 6,772545519 | PCP024202 | XM_008391557 |
| PCP024205 | 6,672425342 | 6,686500527 | 6,464831606 | 5,663059924 |           |              |
| PCP024227 | 6,143026004 | 6,029673735 | 5,470211457 | 4,087462841 | PCP024227 | XM_008391526 |
| PCP024235 | 6,491853096 | 6,523561956 | 6,857980995 | 6,442943496 |           |              |
| PCP024242 | 5,691254979 | 5,222263604 | 5,058749412 | 4,564987801 |           |              |
| PCP024246 | 6,777025123 | 5,977279923 | 6,222456826 | 5,369117459 | PCP024246 | XM_008391505 |
| PCP024257 | 5,369117459 | 5,058749412 | 5,634302842 | 7,473056289 | PCP024257 | XM_008388402 |
| PCP024261 | 5,746043983 | 5,297558281 | 4,754887502 | 3,969933275 |           |              |
| PCP024278 | 5,930737338 | 5,754887502 | 6,156437068 | 6,845490051 | PCP024278 | XM_018645359 |
| PCP024280 | 4,414812061 | 4,459431619 | 4,700439718 | 5,663059924 | PCP024280 | XM_009348833 |
| PCP024332 | 4,64385619  | 4,143230135 | 4,321928095 | 5,754887502 | PCP024332 | XM_009362609 |
| PCP024346 | 4,95419631  | 5,754887502 | 5,380937195 | 5,222263604 | PCP024346 | XM_018648424 |
| PCP024350 | 6,700439718 | 6,222456826 | 5,736875423 | 7,047996356 | PCP024350 | XM_009362580 |
| PCP024355 | 7,014913158 | 7,06608919  | 6,648609245 | 6,297741678 | PCP024355 | XM_018646923 |
| PCP024371 | 6,101608059 | 6,481072857 | 6,183288001 | 6,176522247 |           |              |
| PCP024443 | 6,513016928 | 5,624393382 | 5,789990019 | 4,718635616 | PCP024443 | XM_009377072 |
| PCP024450 | 6,196331634 | 6,058965822 | 5,691254979 | 4,824258697 | PCP024450 | XM_009376885 |
| PCP024466 | 3,700439718 | 4,414812061 | 4,938756261 | 5,369117459 | PCP024466 | XM_009369489 |
| PCP024477 | 6,169925001 | 5,333781501 | 5,882643049 | 5,523561956 | PCP024477 | XM_009349711 |
| PCP024488 | 7,08395793  | 7,029784146 | 6,72342204  | 6,380764075 | PCP024488 | XM_009376792 |
| PCP024562 | 4,459431619 | 5,309976492 | 6,087462841 | 5,672425342 | PCP024562 | XM_009337531 |
| PCP024604 | 5,183089461 | 5,392317423 | 6,38663853  | 6,727920455 | PCP024604 | XM_009350675 |
| PCP024607 | 6,459431619 | 6,38663853  | 6,906890596 | 6,303780748 | PCP024607 | XM_009367825 |
| PCP024641 | 5,554588852 | 5,285402219 | 5,285402219 | 6,72342204  | PCP024641 | XM_018652153 |
| PCP024645 | 5,977279923 | 6,06608919  | 6,431790083 | 7,037052702 | PCP024645 | XM_009379462 |
| PCP024651 | 5,866166169 | 5,513174885 | 6,50779464  | 6,785681319 | PCP024651 | XM_009369462 |
| PCP024654 | 7,08395793  | 7,051698368 | 6,772545519 | 6,22881869  | PCP024654 | XM_009369465 |
| PCP024659 | 6,459431619 | 5,969703088 | 6,297741678 | 5,718909554 | PCP024659 | XM_009354179 |
| PCP024662 | 5,523561956 | 5           | 5,247927513 | 3,736604875 |           |              |
| PCP024667 | 5,992541859 | 6,015024705 | 5,930737338 | 5,57500972  |           |              |
| PCP024704 | 5,196528361 | 4,662775172 | 4,890933022 | 3,906890596 |           |              |
| PCP024710 | 6,481072857 | 6,534030467 | 6,667750232 | 6,24164954  | PCP024710 | XM_009365662 |
| PCP024718 | 6,196331634 | 6,4374608   | 6,737010678 | 6,950351762 | PCP024718 | XR_001953425 |
| PCP024722 | 5,222263604 | 5,470211457 | 5,235344128 | 4,059182199 |           |              |
| PCP024757 | 4,922673593 | 5,235344128 | 3,624100895 | 4,824258697 |           |              |
| PCP024767 | 6,727920455 | 6,845490051 | 6,772545519 | 6,363346321 | PCP024767 | XM_009369803 |
| PCP024783 | 5,906890596 | 6,189824559 | 6,247927513 | 5,781359714 |           |              |
| PCP024805 | 7,247927513 | 6,559644763 | 5,866166169 | 6,285402219 | PCP024805 | XM_009372763 |



|           |             |             |             |             |           |              |
|-----------|-------------|-------------|-------------|-------------|-----------|--------------|
| PCP024822 | 6,24164954  | 6,136068312 | 5,513174885 | 4,414812061 | PCP024822 | NM_001319810 |
| PCP024823 | 5,014801602 | 5,459431619 | 6,22881869  | 6,497133304 |           |              |
| PCP024843 | 5,60496087  | 5,48123435  | 6,403778984 | 7,251056285 | PCP024843 | XM_009336933 |
| PCP024853 | 5,672425342 | 6,051589621 | 6,14974712  | 6,820178962 |           |              |
| PCP024861 | 6,807354922 | 6,392317423 | 6,426264755 | 6,454011343 | PCP024861 | XM_008395291 |
| PCP024891 | 5,874551087 | 5,77267747  | 4,890933022 | 4,807354922 | PCP024891 | XM_009338346 |
| PCP024913 | 6,599912842 | 6,375039431 | 6,363346321 | 5,914803677 | PCP024913 | XM_018651107 |
| PCP024941 | 4,584962501 | 4,790250739 | 6,327866971 | 5,235344128 | PCP024941 | XM_009349093 |
| PCP024944 | 3,624100895 | 4,196134881 | 6,297741678 | 4,857980995 | PCP024944 | XM_009349094 |
| PCP024946 | 4,584962501 | 4,272769732 | 6,686500527 | 5,392317423 | PCP024946 | XM_009349094 |
| PCP024988 | 6,254178286 | 6,523561956 | 6,4374608   | 7,30679083  | PCP024988 | XM_009381176 |
| PCP024999 | 6,279285561 | 5,781359714 | 5,969703088 | 5,48123435  | PCP024999 | XM_009381161 |
| PCP025010 | 5,073391816 | 4,890933022 | 4,874305166 | 3,906890596 | PCP025010 | XM_009343931 |
| PCP025011 | 7,761551232 | 6,894817763 | 7,033423002 | 5,746043983 | PCP025011 | XM_009343926 |
| PCP025032 | 6,03716255  | 5,333781501 | 5,156639311 | 5,087462841 |           |              |
| PCP025114 | 6,363346321 | 6,759289016 | 6,4374608   | 6,051589621 | PCP025114 | XM_009361766 |
| PCP025126 | 5,815831566 | 4,459431619 | 4,029452886 | 4,662775172 |           |              |
| PCP025143 | 5,333781501 | 5,653346693 | 5,906890596 | 6,297741678 | PCP025143 | XM_009379430 |
| PCP025195 | 6,554588852 | 6,672425342 | 6,414981143 | 7,156538193 | PCP025195 | XM_008365465 |
| PCP025209 | 5,129283017 | 5,64385619  | 4,772413555 | 7,014913158 | PCP025209 | XM_009365748 |
| PCP025229 | 5,832890014 | 6,03716255  | 6,431790083 | 6,882643049 |           |              |
| PCP025231 | 6,718772592 | 6,68187088  | 6,639087423 | 6,327866971 | PCP025231 | XM_008339645 |
| PCP025287 | 6,094447222 | 6,564835417 | 3,221877081 | 6,454011343 | PCP025287 | XM_009336213 |
| PCP025307 | 6,442943496 | 6,523561956 | 6,677085351 | 7,098032083 | PCP025307 | XM_009335984 |
| PCP025314 | 6,574858391 | 5,763677142 | 5,691254979 | 5,437294331 | PCP025314 | XM_009357996 |
| PCP025316 | 4,772413555 | 4,247927513 | 5,285402219 | 5,624393382 | PCP025316 | XM_009357990 |
| PCP025339 | 6,196331634 | 6,108524457 | 6,080444483 | 5,554588852 | PCP025339 | XM_009339004 |
| PCP025347 | 4,95419631  | 5,681730355 | 5,653346693 | 6,029673735 | PCP025347 | XM_021977152 |
| PCP025353 | 6,862079387 | 6,619559738 | 6,333960351 | 6,828707735 |           |              |
| PCP025388 | 4,906890596 | 4,564987801 | 5,77267747  | 5,781359714 | PCP025388 | XM_008367825 |
| PCP025433 | 5,781359714 | 5,415150205 | 5,544423562 | 4,772413555 | PCP025433 | XM_009350589 |
| PCP025450 | 6,189824559 | 6,403778984 | 6,291493053 | 5,222263604 | PCP025450 | XM_018651739 |
| PCP025458 | 6,31596467  | 6,491853096 | 6,832890014 | 7,139551352 |           |              |
| PCP025481 | 5,653346693 | 5,101397952 | 5,196528361 | 4,480911346 | PCP025481 | XM_009351220 |
| PCP025511 | 6,559644763 | 6,07317756  | 6,906890596 | 6,309794644 | PCP025511 | XM_009359922 |
| PCP025559 | 4,790250739 | 5           | 4,985044962 | 5,938521046 | PCP025559 | XM_009345513 |
| PCP025583 | 4,824258697 | 5,129283017 | 5,653346693 | 4,95419631  |           |              |
| PCP025596 | 6,06608919  | 5,491853096 | 5,196528361 | 4,64385619  |           |              |
| PCP025645 | 7,212666605 | 6,890811455 | 6,754887502 | 6,254178286 |           |              |
| PCP025650 | 6,981053471 | 6,569855608 | 6,828707735 | 6,677085351 | PCP025650 | XR_001953390 |
| PCP025683 | 7,115511897 | 6,634157606 | 6,554588852 | 6,297741678 | PCP025683 | XM_009378762 |
| PCP025709 | 5           | 4,321928095 | 6,824386003 | 5,709566354 |           |              |
| PCP025732 | 3,969933275 | 4,196134881 | 4,64385619  | 5,345893086 | PCP025732 | XM_008350125 |
| PCP025748 | 5,746043983 | 6,122465658 | 5,380937195 | 5,142821844 | PCP025748 | XM_009336035 |
| PCP025755 | 6,807354922 | 7,348728154 | 6,648609245 | 5,718909554 | PCP025755 | XM_009336113 |
| PCP025769 | 5,196528361 | 4,321928095 | 4,807354922 | 5,502394256 | PCP025769 | XM_009336289 |

|           |             |             |             |             |           |              |
|-----------|-------------|-------------|-------------|-------------|-----------|--------------|
| PCP025788 | 6,977279923 | 6,798698597 | 6,481072857 | 7,14974712  | PCP025788 | XM_009336525 |
| PCP025808 | 5,380937195 | 5,584962501 | 5,209453366 | 4,564987801 | PCP025808 | XM_008352268 |
| PCP025817 | 5,345893086 | 5,984817174 | 5,196528361 | 8,241601875 | PCP025817 | XM_009336937 |
| PCP025818 | 5,634302842 | 5,058749412 | 4,459431619 | 4,874305166 | PCP025818 | XM_009359037 |
| PCP025827 | 6,143026004 | 6,094447222 | 6,448405435 | 5,930737338 | PCP025827 | XM_009380488 |
| PCP025880 | 4,700439718 | 5,309976492 | 5,544423562 | 5,890689878 | PCP025880 | XM_009338673 |
| PCP025885 | 6,727920455 | 5,984817174 | 6,523561956 | 6,845490051 | PCP025885 | XM_009338677 |
| PCP025891 | 6,589913261 | 5,754887502 | 5,961854808 | 5,64385619  | PCP025891 | XM_008388784 |
| PCP025899 | 5,169925001 | 6           | 5,772677747 | 6,266786541 | PCP025899 | XM_008390302 |
| PCP025928 | 3,459431619 | 4,564987801 | 6,176522247 | 7,965784285 | PCP025928 | XM_009375009 |
| PCP025929 | 6           | 5,309976492 | 4,196134881 | 3,624100895 | PCP025929 | XM_009375010 |
| PCP025973 | 6,50779464  | 6,497133304 | 6,790120385 | 7,315874125 | PCP025973 | XM_009358145 |
| PCP026011 | 5,60496087  | 4,718635616 | 5,073391816 | 4,414812061 | PCP026011 | XM_009371442 |
| PCP026019 | 4,272769732 | 4,64385619  | 5,044394119 | 7,011227255 |           |              |
| PCP026021 | 6,094447222 | 6,363346321 | 6,745909573 | 7,003714662 | PCP026021 | XM_018650301 |
| PCP026023 | 6,143026004 | 6,634157606 | 6,579994693 | 6,853870927 | PCP026023 | XM_009371253 |
| PCP026024 | 6,914923239 | 6,64385619  | 6,554588852 | 6,363346321 |           |              |
| PCP026039 | 5,014801602 | 4,857980995 | 4,544114402 | 4,169925001 | PCP026039 | XM_009354716 |
| PCP026057 | 6,426264755 | 6,732404887 | 6,442943496 | 6,375039431 | PCP026057 | XM_009354743 |
| PCP026058 | 6,798698597 | 6,363346321 | 6,442943496 | 6,022367813 | PCP026058 | XM_018646733 |
| PCP026077 | 6,333960351 | 6,653490009 | 6,584962501 | 7,655852677 | PCP026077 | XM_018643387 |
| PCP026085 | 6,634157606 | 5,183089461 | 5,369117459 | 4           |           |              |
| PCP026102 | 6,564835417 | 6,303780748 | 6,397974049 | 6,254178286 | PCP026102 | XM_009339932 |
| PCP026125 | 4,682011391 | 5,101397952 | 5,087462841 | 6,156437068 |           |              |
| PCP026143 | 5,380937195 | 5,273142859 | 6,044394119 | 7,044394119 | PCP026143 | XM_008341722 |
| PCP026166 | 5,48123435  | 4,938756261 | 5,57500972  | 6,203005338 | PCP026166 | XM_009354437 |
| PCP026197 | 2,414135533 | 5,345893086 | 4,196134881 | 6,619559738 | PCP026197 | XM_018649522 |
| PCP026207 | 5,709566354 | 5,57500972  | 5,882643049 | 5,058749412 | PCP026207 | XM_008381425 |
| PCP026210 | 6,279285561 | 6,714245518 | 5,992541859 | 5,781359714 | PCP026210 | XM_008339944 |
| PCP026243 | 5,718909554 | 6,129283017 | 6,454011343 | 6,750472519 |           |              |
| PCP026256 | 6,977279923 | 6,380764075 | 6,781359714 | 7,139551352 | PCP026256 | XM_009363240 |
| PCP026267 | 5,209453366 | 6,554588852 | 5,807354922 | 6,475733431 | PCP026267 | XM_009364529 |
| PCP026269 | 5,772677747 | 6,357552005 | 6,279285561 | 6,946379968 | PCP026269 | XM_009364449 |
| PCP026279 | 5,101397952 | 5,614709844 | 6,087462841 | 5,890689878 | PCP026279 | XM_009364437 |
| PCP026280 | 4,772413555 | 5,321928095 | 5,898933872 | 7,61227877  | PCP026280 | XM_009364436 |
| PCP026309 | 6,763809907 | 5,898933872 | 5,663059924 | 5,672425342 | PCP026309 | XM_017327419 |
| PCP026310 | 6,345715709 | 5,882643049 | 5,841218374 | 5,426264755 | PCP026310 | XM_009345051 |
| PCP026338 | 5,874551087 | 5,95419631  | 6,4374608   | 7,153095972 | PCP026338 | XM_018645161 |
| PCP026349 | 5,285402219 | 4,459431619 | 6           | 5,523561956 | PCP026349 | XM_018643037 |
| PCP026350 | 5,437294331 | 6,599912842 | 5,815831566 | 4,321928095 | PCP026350 | XM_018643038 |
| PCP026353 | 6,363346321 | 6,4374608   | 5,95419631  | 5,709566354 |           |              |
| PCP026354 | 5,087462841 | 5,333781501 | 5,247927513 | 4,437627248 |           |              |
| PCP026394 | 6,958030641 | 6,589913261 | 6,101608059 | 5,653346693 |           |              |
| PCP026423 | 6,022367813 | 5,533874777 | 6,279285561 | 5,807354922 | PCP026423 | XM_009360773 |
| PCP026457 | 5,922911406 | 5,533874777 | 6,215872703 | 5,614709844 | PCP026457 | XM_018645334 |
| PCP026486 | 7,047996356 | 6,464831606 | 6,523561956 | 6,523561956 | PCP026486 | XM_009343584 |

|           |             |             |             |             |           |              |
|-----------|-------------|-------------|-------------|-------------|-----------|--------------|
| PCP026489 | 6,47037417  | 5,882643049 | 6,31596467  | 5,709566354 | PCP026489 | XM_008350455 |
| PCP026507 | 5,824513297 | 5,824513297 | 6,279285561 | 6,84962403  |           |              |
| PCP026576 | 5,115615931 | 5,380937195 | 5,624393382 | 4,624685811 | PCP026576 | XM_009354031 |
| PCP026588 | 4,73714592  | 4,700439718 | 5,369117459 | 6,087462841 | PCP026588 | XM_009356482 |
| PCP026592 | 5,874551087 | 5,653346693 | 5,95419631  | 6,539158811 |           |              |
| PCP026615 | 6,4374608   | 6,614709844 | 6,667750232 | 6,163297449 | PCP026615 | XM_009362266 |
| PCP026619 | 6,272956308 | 5,64385619  | 5,415150205 | 5,564683017 | PCP026619 | XM_009362361 |
| PCP026636 | 5,718909554 | 5,235344128 | 5,196528361 | 3,906890596 | PCP026636 | XM_009362304 |
| PCP026647 | 6,015024705 | 6,31596467  | 6,584962501 | 6,832890014 |           |              |
| PCP026661 | 6,291493053 | 6,624539604 | 6,902917719 | 7,342785837 | PCP026661 | XM_009379097 |
| PCP026667 | 5,101397952 | 4,857980995 | 4,922673593 | 4,029452886 | PCP026667 | XM_018652374 |
| PCP026683 | 5,554588852 | 4,73714592  | 5,459431619 | 4,874305166 | PCP026683 | XM_018646286 |
| PCP026705 | 7,073284692 | 8,393733366 | 6,044394119 | 2,503348735 | PCP026705 | XM_009362336 |
| PCP026706 | 6,351734323 | 6,357552005 | 7,087462841 | 6,922792504 | PCP026706 | XM_009362339 |
| PCP026718 | 6,564835417 | 6,922792504 | 6,403778984 | 5,614709844 |           |              |
| PCP026751 | 5,746043983 | 6,087462841 | 6,163297449 | 6,614709844 | PCP026751 | XM_018644119 |
| PCP026785 | 6,339850003 | 6,475733431 | 6,321928095 | 7,062531903 |           |              |
| PCP026797 | 6,24164954  | 6,599912842 | 6,667750232 | 5,754887502 | PCP026797 | XM_009337676 |
| PCP026800 | 4,807354922 | 5,403608584 | 5,64385619  | 5,914803677 |           |              |
| PCP026830 | 5,798828178 | 6,321928095 | 6,203005338 | 6,695854658 | PCP026830 | XM_009347727 |
| PCP026838 | 4,772413555 | 5,815831566 | 6,115407855 | 7,377904593 | PCP026838 | XM_018648269 |
| PCP026863 | 6,732404887 | 6,321928095 | 6,22881869  | 6,247927513 | PCP026863 | XM_008349391 |
| PCP026873 | 6,122465658 | 5,946496941 | 5,890689878 | 5,101397952 |           |              |
| PCP026912 | 6,62935662  | 6,058965822 | 6,4374608   | 6,215872703 | PCP026912 | XM_008339120 |
| PCP026914 | 6,54951516  | 6,534030467 | 5,874551087 | 5,285402219 | PCP026914 | NM_001328716 |
| PCP026971 | 4,059182199 | 4,222650022 | 4,34553831  | 5,523561956 | PCP026971 | NM_001293901 |
| PCP027006 | 5,235344128 | 5,700439718 | 5,922911406 | 6,297741678 |           |              |
| PCP027012 | 5,101397952 | 5,247927513 | 5           | 4,222650022 |           |              |
| PCP027041 | 6,015024705 | 5,922911406 | 5,426264755 | 5,357552005 | PCP027041 | XM_009344278 |
| PCP027070 | 5,470211457 | 4,772413555 | 4,841469999 | 4,143230135 | PCP027070 | XM_018648044 |
| PCP027071 | 5,235344128 | 4,369466484 | 4,985044962 | 4,321928095 |           |              |
| PCP027077 | 3,368768349 | 4,890933022 | 5,824513297 | 6           | PCP027077 | XM_009347181 |
| PCP027117 | 6,99242856  | 6,727920455 | 6,732404887 | 6,528727582 | PCP027117 | XR_001952841 |
| PCP027119 | 6,634157606 | 6,60481265  | 6,333960351 | 7,254272787 | PCP027119 | XM_008365756 |
| PCP027122 | 6,886672074 | 6,741466986 | 6,50779464  | 6,051589621 | PCP027122 | XM_017335132 |
| PCP027132 | 7,125878364 | 5,564683017 | 5,691254979 | 4,564987801 | PCP027132 | XM_009340127 |
| PCP027134 | 5,789990019 | 5,77267747  | 5,584962501 | 5,297558281 | PCP027134 | XM_018648770 |
| PCP027142 | 7,094552786 | 6,741466986 | 6,97349648  | 6,594996337 | PCP027142 | XM_009346734 |
| PCP027154 | 4,297925053 | 4,059182199 | 4,059182199 | 5,992541859 | PCP027154 | XM_008387978 |
| PCP027159 | 6,426264755 | 6,737010678 | 7,026025399 | 7,062531903 | PCP027159 | XM_021953946 |
| PCP027162 | 7,412188747 | 6,667750232 | 6,709704193 | 6,03716255  | PCP027162 | XM_009372465 |
| PCP027194 | 5,841218374 | 5,014801602 | 5,426264755 | 4,564987801 | PCP027194 | XM_009372532 |
| PCP027198 | 6,80309785  | 6,781359714 | 6,4374608   | 6,491853096 | PCP027198 | XM_017327449 |
| PCP027273 | 5,554588852 | 5,48123435  | 5,02989455  | 4,857980995 | PCP027273 | XM_008395330 |
| PCP027303 | 6,574858391 | 6,022367813 | 5,709566354 | 5,459431619 | PCP027303 | XM_018649336 |
| PCP027331 | 6,235152624 | 5,781359714 | 6,044394119 | 6,62935662  | PCP027331 | XM_009346819 |

|           |             |             |             |             |           |              |
|-----------|-------------|-------------|-------------|-------------|-----------|--------------|
| PCP027342 | 6,934634441 | 6,906890596 | 6,853870927 | 6,691115365 | PCP027342 | XM_009373107 |
| PCP027358 | 5,984817174 | 5,922911406 | 5,890689878 | 5,222263604 | PCP027358 | XM_008372155 |
| PCP027363 | 5,914803677 | 5,984817174 | 5,930737338 | 6,768184325 | PCP027363 | XM_018643335 |
| PCP027430 | 5,653346693 | 5,392317423 | 5,798828178 | 6,486553493 | PCP027430 | XM_009349692 |
| PCP027431 | 6,874428132 | 6,345715709 | 6,115407855 | 5,77267747  | PCP027431 | XM_009349687 |
| PCP027432 | 3,807354922 | 4,059182199 | 4,807354922 | 5,77267747  |           |              |
| PCP027449 | 6,222456826 | 6,094447222 | 6,235152624 | 8,403736386 | PCP027449 | XM_009370435 |
| PCP027458 | 6,431790083 | 6,442943496 | 6,4374608   | 7,040782866 |           |              |
| PCP027459 | 4,938756261 | 5,653346693 | 5,415150205 | 6,108524457 | PCP027459 | XM_021970599 |
| PCP027475 | 6,60481265  | 6,351734323 | 6,528727582 | 5,984817174 | PCP027475 | XM_009370400 |
| PCP027492 | 5,169925001 | 5,533874777 | 5,57500972  | 4,906890596 | PCP027492 | XM_009342176 |
| PCP027505 | 4,906890596 | 6,07317756  | 6,554588852 | 4,772413555 | PCP027505 | XM_008354153 |
| PCP027549 | 5,857980995 | 5,470211457 | 5,938521046 | 4,321928095 | PCP027549 | XM_009381253 |
| PCP027553 | 5,691254979 | 4,874305166 | 5,297558281 | 5,058749412 | PCP027553 | XM_009381258 |
| PCP027572 | 5,129283017 | 5,502394256 | 5,357552005 | 6,14974712  |           |              |
| PCP027590 | 6,409390936 | 6,619559738 | 6,297741678 | 5,235344128 | PCP027590 | XM_018645988 |
| PCP027603 | 5,807354922 | 5,02989455  | 5,64385619  | 6,926829678 |           |              |
| PCP027610 | 5,977279923 | 6,14974712  | 6,448405435 | 6,732404887 | PCP027610 | XM_009370616 |
| PCP027611 | 6,266786541 | 6           | 6,321928095 | 6,781359714 | PCP027611 | XM_009370621 |
| PCP027619 | 7,369204723 | 6,882643049 | 6,768184325 | 6,392317423 | PCP027619 | XM_009355887 |
| PCP027634 | 6,409390936 | 6,60481265  | 6,594996337 | 7,076815597 | PCP027634 | XM_009356212 |
| PCP027635 | 4,874305166 | 4,321928095 | 6,497133304 | 4,624685811 | PCP027635 | XM_009340666 |
| PCP027683 | 5,754887502 | 5,882643049 | 6,051589621 | 6,594996337 | PCP027683 | XM_008344076 |
| PCP027684 | 5,709566354 | 5,169925001 | 5,914803677 | 6,667750232 | PCP027684 | XM_008364106 |
| PCP027703 | 3,544732656 | 4,437627248 | 5,169925001 | 4,938756261 |           |              |
| PCP027715 | 5,938521046 | 5,448570626 | 5,584962501 | 4,624685811 | PCP027715 | XM_008390949 |
| PCP027731 | 4,906890596 | 5,247927513 | 5,533874777 | 6,169925001 |           |              |
| PCP027737 | 5,727920455 | 5,564683017 | 5,681730355 | 5,142821844 |           |              |
| PCP027745 | 5,48123435  | 5,691254979 | 6,044394119 | 6,569855608 | PCP027745 | XM_018642889 |
| PCP027746 | 6,737010678 | 5,709566354 | 6,64385619  | 6,714245518 |           |              |
| PCP027769 | 7,033423002 | 6,634157606 | 5,798828178 | 5,857980995 |           |              |
| PCP027840 | 5,309976492 | 6,426264755 | 5,260402093 | 5,448570626 |           |              |
| PCP027844 | 6,672425342 | 5,709566354 | 6,464831606 | 0           |           |              |
| PCP027849 | 2,873813198 | 6,853870927 | 7,822284016 | 6,832890014 | PCP027849 | XM_009358741 |
| PCP027860 | 6,569855608 | 6,709704193 | 6,737010678 | 6,14974712  |           |              |
| PCP027900 | 5,115615931 | 4,682011391 | 4,502712486 | 4,059182199 |           |              |
| PCP027904 | 6,528727582 | 6,569855608 | 6,101608059 | 5,798828178 |           |              |
| PCP027928 | 5,841218374 | 6,392317423 | 6,662917555 | 6,824386003 | PCP027928 | XM_009357712 |
| PCP027953 | 5,898933872 | 5,459431619 | 5,426264755 | 4,272769732 | PCP027953 | XM_017325021 |
| PCP027958 | 7,011227255 | 6,714245518 | 6,988684687 | 6,235152624 | PCP027958 | XM_009336260 |
| PCP027971 | 6,115407855 | 6,260590275 | 6,392317423 | 6,882643049 |           |              |
| PCP028004 | 4,544114402 | 4,874305166 | 5,115615931 | 3,700439718 | PCP028004 | XM_009356223 |
| PCP028014 | 5,297558281 | 5,584962501 | 5,614709844 | 6,345715709 | PCP028014 | XM_009347932 |
| PCP028021 | 5,857980995 | 5,922911406 | 6,534030467 | 6,837060204 | PCP028021 | XM_008354988 |
| PCP028024 | 6,122465658 | 5,824513297 | 5,914803677 | 6,918863237 | PCP028024 | NM_001328731 |
| PCP028129 | 5,700439718 | 5,345893086 | 5,824513297 | 6,614709844 |           |              |

|           |             |             |             |             |           |              |
|-----------|-------------|-------------|-------------|-------------|-----------|--------------|
| PCP028130 | 5,554588852 | 5,564683017 | 5,898933872 | 6,534030467 | PCP028130 | XM_009354277 |
| PCP028162 | 6,95419631  | 7,136170875 | 5,77267747  | 5,544423562 | PCP028162 | XM_009361399 |
| PCP028169 | 6,375039431 | 6,554588852 | 6,969587981 | 6,50779464  | PCP028169 | XM_009358300 |
| PCP028187 | 4,169925001 | 3,906890596 | 3,969933275 | 6,163297449 | PCP028187 | NM_001328736 |
| PCP028200 | 6,189824559 | 6,397974049 | 6,790120385 | 7,667679281 | PCP028200 | XM_009341787 |
| PCP028218 | 6,648609245 | 6,080444483 | 5,938521046 | 5,807354922 | PCP028218 | XM_008352641 |
| PCP028225 | 6,333960351 | 6,03716255  | 5,866166169 | 5,345893086 | PCP028225 | XM_009339443 |
| PCP028248 | 5,938521046 | 6,080444483 | 6,222456826 | 6,965784285 | PCP028248 | XM_009356953 |
| PCP028254 | 6,853870927 | 6,64385619  | 7,040782866 | 6,68187088  | PCP028254 | XM_009353518 |
| PCP028262 | 6,705010253 | 6,339850003 | 6,513016928 | 6,247927513 | PCP028262 | XM_009372968 |
| PCP028291 | 3,938285792 | 3,874796966 | 4,73714592  | 5,502394256 | PCP028291 | XM_009359545 |
| PCP028378 | 5,073391816 | 4,841469999 | 4,544114402 | 3,906890596 | PCP028378 | XM_009343931 |
| PCP028392 | 5,700439718 | 5,727920455 | 5,857980995 | 5,014801602 | PCP028392 | XM_009363176 |
| PCP028413 | 4,754887502 | 3,840966704 | 6,68187088  | 5,448570626 | PCP028413 | XM_008392377 |
| PCP028471 | 6,559644763 | 5,906890596 | 6,029673735 | 4,718635616 | PCP028471 | XM_008378350 |
| PCP028494 | 6,156437068 | 6,491853096 | 6,977279923 | 7,351645995 | PCP028494 | XM_009378237 |
| PCP028532 | 5,564683017 | 5,222263604 | 6,369291982 | 6,285402219 | PCP028532 | XM_017322527 |
| PCP028603 | 6,209453366 | 6,339850003 | 6,015024705 | 5,653346693 | PCP028603 | XM_009371579 |
| PCP028619 | 5,273142859 | 4,874305166 | 5,142821844 | 4,392317423 | PCP028619 | XM_009380536 |
| PCP028623 | 6,686500527 | 6,589913261 | 6,189824559 | 5,922911406 |           |              |
| PCP028636 | 5,700439718 | 5,437294331 | 5,709566354 | 5,142821844 | PCP028636 | XM_008343569 |
| PCP028684 | 6,321928095 | 6,574858391 | 6,639087423 | 7,30679083  | PCP028684 | XM_009352977 |
| PCP028759 | 5,815831566 | 5,459431619 | 5,273142859 | 4,392317423 | PCP028759 | XM_008384005 |
| PCP028795 | 5,653346693 | 6,058965822 | 6,47037417  | 6,481072857 | PCP028795 | XM_008393589 |
| PCP028844 | 6,143026004 | 5,866166169 | 5,533874777 | 5,058749412 | PCP028844 | XM_009373799 |
| PCP028848 | 5,502394256 | 5,653346693 | 6,662917555 | 7,62935662  | PCP028848 | XM_009373806 |
| PCP028877 | 6,357552005 | 6,14974712  | 6,820178962 | 6,705010253 | PCP028877 | XM_008362033 |
| PCP028891 | 6,965784285 | 6,824386003 | 6,902917719 | 6,279285561 | PCP028891 | XM_008382452 |
| PCP028892 | 6,392317423 | 5,882643049 | 5,914803677 | 5,273142859 | PCP028892 | XM_008382454 |
| PCP028912 | 5,754887502 | 5,196528361 | 5,260402093 | 4,480911346 | PCP028912 | XM_009341624 |
| PCP028923 | 5,624393382 | 5,866166169 | 5,523561956 | 4,502712486 | PCP028923 | XM_009372873 |
| PCP028945 | 5,815831566 | 5,101397952 | 5,02989455  | 4,772413555 | PCP028945 | XM_008343943 |
| PCP028975 | 6,169925001 | 6,81159947  | 6,686500527 | 6,820178962 | PCP028975 | XM_009337084 |
| PCP028985 | 5,309976492 | 6,196331634 | 6,339850003 | 6,392317423 |           |              |
| PCP029003 | 6,215872703 | 6,260590275 | 6,695854658 | 7,247927513 | PCP029003 | XM_009335758 |
| PCP029009 | 5,746043983 | 4,087462841 | 5,044394119 | 3,663344619 | PCP029009 | XM_009335766 |
| PCP029075 | 6,122465658 | 5,614709844 | 5,073391816 | 4,414812061 | PCP029075 | XM_018649495 |
| PCP029100 | 6,523561956 | 6,303780748 | 6,50255338  | 7,497213158 |           |              |
| PCP029134 | 5,533874777 | 5,448570626 | 4,73714592  | 4,624685811 | PCP029134 | XM_018645093 |
| PCP029160 | 4,321928095 | 5,058749412 | 6,95419631  | 8,560982378 | PCP029160 | XM_009354570 |
| PCP029169 | 5,763677142 | 5,584962501 | 5,938521046 | 5,129283017 | PCP029169 | XM_009354584 |
| PCP029194 | 5,426264755 | 5,309976492 | 5,824513297 | 5,156639311 | PCP029194 | XM_008380831 |
| PCP029229 | 6,99242856  | 7,007531912 | 6,815959618 | 5,718909554 | PCP029229 | XM_009366901 |
| PCP029247 | 6,559644763 | 6,634157606 | 6,737010678 | 5,95419631  | PCP029247 | XM_009366926 |
| PCP029261 | 6,64385619  | 7,087462841 | 6,695854658 | 6,309794644 | PCP029261 | XM_008346095 |
| PCP029293 | 4,718635616 | 5,196528361 | 4,857980995 | 5,763677142 | PCP029293 | XM_008241565 |

|           |             |             |             |             |           |              |
|-----------|-------------|-------------|-------------|-------------|-----------|--------------|
| PCP029328 | 4,459431619 | 4,807354922 | 4,523561956 | 5,727920455 | PCP029328 | XM_009352603 |
| PCP029358 | 5,309976492 | 4,718635616 | 4,922673593 | 4,502712486 |           |              |
| PCP029384 | 5,426264755 | 5,681730355 | 5,60496087  | 6,333960351 |           |              |
| PCP029386 | 6,272956308 | 5,285402219 | 5,058749412 | 3,906890596 | PCP029386 | XM_009336947 |
| PCP029391 | 6,094447222 | 6,196331634 | 6,094447222 | 5,789990019 | PCP029391 | XM_017329960 |
| PCP029399 | 5,798828178 | 5,906890596 | 6,31596467  | 6,84962403  | PCP029399 | XM_017322698 |
| PCP029401 | 6,714245518 | 6,86628983  | 6,727920455 | 6,589913261 | PCP029401 | XM_018649072 |
| PCP029429 | 5,285402219 | 6,614709844 | 5,426264755 | 5,101397952 | PCP029429 | XM_008382563 |
| PCP029466 | 5           | 5,448570626 | 5,357552005 | 6,481072857 | PCP029466 | XM_008357809 |
| PCP029517 | 6,523561956 | 6,569855608 | 6,981053471 | 7,263691734 | PCP029517 | XM_018644889 |
| PCP029563 | 6,38663853  | 6,22881869  | 6,564835417 | 7,018700931 | PCP029563 | XM_009362973 |
| PCP029565 | 6,101608059 | 5,866166169 | 5,824513297 | 5,297558281 | PCP029565 | XM_009362975 |
| PCP029566 | 6,169925001 | 6,397974049 | 6,539158811 | 7,215969746 | PCP029566 | XM_009362977 |
| PCP029582 | 5,260402093 | 4,841469999 | 5,115615931 | 3,700439718 | PCP029582 | XM_009358960 |
| PCP029633 | 4,874305166 | 5,60496087  | 4,624685811 | 4,502712486 |           |              |
| PCP029649 | 5,491853096 | 5,380937195 | 4,115199749 | 5,357552005 | PCP029649 | XM_008339594 |
| PCP029665 | 5,624393382 | 6,094447222 | 6,22881869  | 6,414981143 | PCP029665 | XM_009353536 |
| PCP029669 | 6,47037417  | 6,203005338 | 5,992541859 | 5,930737338 | PCP029669 | XM_008378821 |
| PCP029685 | 6,459431619 | 5,946496941 | 6,403778984 | 5,614709844 | PCP029685 | XR_001951494 |
| PCP029690 | 7,251056285 | 6,554588852 | 5,64385619  | 5           | PCP029690 | XM_009380229 |
| PCP029700 | 6,403778984 | 6,700439718 | 6,705010253 | 7,108524457 |           |              |
| PCP029741 | 4,272769732 | 5,073391816 | 5,64385619  | 6,38663853  |           |              |
| PCP029744 | 7,21916852  | 6,938638658 | 6,902917719 | 6,209453366 | PCP029744 | XM_018648044 |
| PCP029772 | 6,709704193 | 6,785681319 | 6,80309785  | 6,426264755 | PCP029772 | XM_008366146 |
| PCP029776 | 5,672425342 | 6,297741678 | 6,136068312 | 6,534030467 | PCP029776 | XM_009368519 |
| PCP029800 | 3,736604875 | 4,247927513 | 5,459431619 | 5,48123435  |           |              |
| PCP029837 | 6,946379968 | 6,781359714 | 7,315874125 | 6,426264755 |           |              |
| PCP029857 | 5,209453366 | 4,73714592  | 4,906890596 | 4,087462841 | PCP029857 | XM_009376472 |
| PCP029872 | 5,992541859 | 5,874551087 | 6,658211483 | 7,539158811 | PCP029872 | XM_009378739 |
| PCP029896 | 6,222456826 | 5,691254979 | 5,746043983 | 5,709566354 | PCP029896 | XM_009342268 |
| PCP029904 | 6,732404887 | 6,375039431 | 6,653490009 | 7,080337882 | PCP029904 | XM_009341360 |
| PCP029931 | 5,727920455 | 5,544423562 | 5,459431619 | 4,985044962 | PCP029931 | XM_009344495 |
| PCP029938 | 6,291493053 | 6,700439718 | 6,392317423 | 5,781359714 | PCP029938 | XM_009379212 |
| PCP029965 | 4,459431619 | 4,922673593 | 4,790250739 | 5,984817174 | PCP029965 | XM_009348239 |
| PCP029978 | 7,029784146 | 7,17990909  | 7,022367813 | 6,260590275 | PCP029978 | XM_008220894 |
| PCP029990 | 6,86628983  | 6,584962501 | 6,291493053 | 6,996275749 | PCP029990 | XM_009358449 |
| PCP030001 | 6,86628983  | 6,946379968 | 7,090959258 | 6,569855608 | PCP030001 | XM_018644084 |
| PCP030043 | 5,992541859 | 5,624393382 | 6,087462841 | 6,634157606 | PCP030043 | XM_009348228 |
| PCP030052 | 6,247927513 | 5,914803677 | 6,667750232 | 5,95419631  | PCP030052 | XM_009362735 |
| PCP030056 | 6,303780748 | 6,007419784 | 5,95419631  | 5,183089461 | PCP030056 | XM_018650290 |
| PCP030096 | 7,037052702 | 6,841344192 | 6,938638658 | 6,60481265  | PCP030096 | XM_009360068 |
| PCP030120 | 6,574858391 | 6,272956308 | 5,992541859 | 5,95419631  | PCP030120 | XM_008370788 |
| PCP030177 | 4,985044962 | 5,222263604 | 4,700439718 | 4,247927513 | PCP030177 | XM_008379374 |
| PCP030182 | 4,544114402 | 4,662775172 | 5,235344128 | 5,824513297 | PCP030182 | XM_008376147 |
| PCP030216 | 7,297649983 | 7,386552314 | 6,781359714 | 5,634302842 | PCP030216 | XM_009361438 |
| PCP030285 | 6,285402219 | 5,992541859 | 6,022367813 | 5,59484709  | PCP030285 | XM_017324555 |

|           |             |             |             |             |           |              |
|-----------|-------------|-------------|-------------|-------------|-----------|--------------|
| PCP030296 | 5,297558281 | 4,857980995 | 4,969472865 | 4,196134881 | PCP030296 | XM_009350589 |
| PCP030306 | 5,533874777 | 5,48123435  | 5,403608584 | 6,209453366 |           |              |
| PCP030309 | 7,193081765 | 6,961970533 | 6,807354922 | 6,523561956 | PCP030309 | XM_018643903 |
| PCP030315 | 7,375039431 | 7,238404739 | 7,222360218 | 5,554588852 | PCP030315 | XR_526171    |
| PCP030343 | 6,534030467 | 5,754887502 | 5,333781501 | 5,718909554 | PCP030343 | NM_001302317 |
| PCP030352 | 5,95419631  | 5,653346693 | 6,741466986 | 7,108524457 |           |              |
| PCP030424 | 6,279285561 | 5,807354922 | 5,273142859 | 4           | PCP030424 | XM_018642848 |
| PCP030426 | 3,840966704 | 4,523561956 | 5,57500972  | 5,044394119 | PCP030426 | XM_008381068 |
| PCP030445 | 4,143230135 | 4,824258697 | 5,95419631  | 4,906890596 | PCP030445 | XM_008359525 |
| PCP030478 | 4,938756261 | 4,841469999 | 5,073391816 | 4           | PCP030478 | XM_018648399 |
| PCP030533 | 6,700439718 | 6,653490009 | 6,122465658 | 6,007419784 | PCP030533 | XM_009342772 |
| PCP030543 | 4,584962501 | 4,754887502 | 5,48123435  | 5,849749117 |           |              |
| PCP030558 | 6,094447222 | 5,763677142 | 5,841218374 | 5,59484709  | PCP030558 | XM_008391587 |
| PCP030566 | 6,044394119 | 5,969703088 | 6,569855608 | 5,48123435  | PCP030566 | XM_008391598 |
| PCP030583 | 5,014801602 | 5,691254979 | 5,64385619  | 6,266786541 | PCP030583 | XM_009341752 |
| PCP030611 | 4,841469999 | 5,415150205 | 5,321928095 | 6,007419784 | PCP030611 | XM_009373678 |
| PCP030646 | 6,094447222 | 5,874551087 | 5,709566354 | 5,513174885 | PCP030646 | XM_008359342 |
| PCP030692 | 6           | 6,108524457 | 6,95419631  | 7,456724026 | PCP030692 | XM_008379132 |
| PCP030702 | 5,77267747  | 6,392317423 | 7,798763389 | 6,950351762 | PCP030702 | XM_009343466 |
| PCP030773 | 5,634302842 | 4,662775172 | 4,115199749 | 4,502712486 | PCP030773 | XM_021961751 |
| PCP030787 | 5,196528361 | 6,087462841 | 6,491853096 | 7,222360218 |           |              |
| PCP030834 | 6,54951516  | 6,882643049 | 6,534030467 | 7,115511897 | PCP030834 | XM_009339276 |
| PCP030841 | 7,783522135 | 6,890811455 | 6,965784285 | 5,60496087  |           |              |
| PCP030851 | 4,143230135 | 4,272769732 | 5,222263604 | 6,015024705 |           |              |
| PCP030922 | 6,658211483 | 6,741466986 | 6,333960351 | 6,247927513 | PCP030922 | XM_009343135 |
| PCP030928 | 4,414812061 | 4,807354922 | 4,247927513 | 5,60496087  | PCP030928 | XM_009376990 |
| PCP030934 | 6,72342204  | 6,672425342 | 7,122362117 | 6,403778984 | PCP030934 | XM_009347676 |
| PCP030940 | 6,169925001 | 6,14974712  | 6,303780748 | 7,062531903 | PCP030940 | XM_009347662 |
| PCP030946 | 5,285402219 | 5,073391816 | 4,64385619  | 3,502075956 | PCP030946 | XM_018643832 |
| PCP030960 | 6,86628983  | 7,189824559 | 6,926829678 | 6           |           |              |
| PCP030972 | 6,667750232 | 6,750472519 | 6,375039431 | 6,291493053 | PCP030972 | XM_009365299 |
| PCP030977 | 5,415150205 | 5,415150205 | 6,094447222 | 5,321928095 |           |              |
| PCP031009 | 4,604664415 | 5,345893086 | 6,108524457 | 5,309976492 | PCP031009 | XM_009342145 |
| PCP031012 | 4,857980995 | 6,183288001 | 5,415150205 | 5,59484709  | PCP031012 | XM_008381628 |
| PCP031024 | 6,115407855 | 6,481072857 | 6,029673735 | 4,718635616 | PCP031024 | XM_018649677 |
| PCP031089 | 6,80309785  | 6,420718183 | 6,584962501 | 6,363346321 | PCP031089 | XM_009364599 |
| PCP031103 | 5,849749117 | 5,624393382 | 5,60496087  | 4,544114402 |           |              |
| PCP031128 | 5,247927513 | 5,392317423 | 5,087462841 | 6,303780748 | PCP031128 | XM_009362243 |
| PCP031140 | 5,977279923 | 5,961854808 | 5,841218374 | 6,569855608 | PCP031140 | XM_009342280 |
| PCP031174 | 6,619559738 | 6,569855608 | 6,087462841 | 6,926829678 | PCP031174 | XM_009343476 |
| PCP031181 | 6,584962501 | 6,513016928 | 6,481072857 | 6,14974712  | PCP031181 | XM_008394865 |
| PCP031188 | 5,297558281 | 4,34553831  | 5,02989455  | 7,759355602 | PCP031188 | XM_008369315 |
| PCP031213 | 7,244791942 | 6,426264755 | 6,058965822 | 6,614709844 | PCP031213 | XM_018649170 |
| PCP031219 | 7,14974712  | 7,08395793  | 6,828707735 | 6,403778984 | PCP031219 | XM_018643657 |
| PCP031225 | 6,007419784 | 6,599912842 | 6,475733431 | 5,984817174 | PCP031225 | XM_009336628 |
| PCP031257 | 5,247927513 | 5,369117459 | 4,938756261 | 3,874796966 | PCP031257 | XM_009339136 |

|           |             |             |             |             |           |              |
|-----------|-------------|-------------|-------------|-------------|-----------|--------------|
| PCP031270 | 5,087462841 | 4,922673593 | 4,857980995 | 3,807354922 | PCP031270 | XM_018649613 |
| PCP031284 | 5,058749412 | 4,73714592  | 4,874305166 | 4           | PCP031284 | XM_008361802 |
| PCP031293 | 5,763677142 | 6,169925001 | 5,961854808 | 6,709704193 | PCP031293 | XM_009368278 |
| PCP031298 | 6,115407855 | 6,272956308 | 6,403778984 | 6,906890596 | PCP031298 | XM_009341375 |
| PCP031310 | 6,47037417  | 6,339850003 | 6,47037417  | 6,058965822 | PCP031310 | XM_009339253 |
| PCP031376 | 6,750472519 | 6,426264755 | 6,741466986 | 6,448405435 |           |              |
| PCP031379 | 5,369117459 | 4,938756261 | 4,718635616 | 4,480911346 | PCP031379 | XM_009375423 |
| PCP031412 | 6,380764075 | 6,672425342 | 6,60481265  | 5,789990019 | PCP031412 | XM_018645425 |
| PCP031467 | 6,183288001 | 6,47037417  | 6,672425342 | 6,906890596 | PCP031467 | XM_009369509 |
| PCP031506 | 6,380764075 | 6           | 5,882643049 | 5,309976492 | PCP031506 | XM_009345665 |
| PCP031508 | 6,662917555 | 5,824513297 | 6,523561956 | 6,087462841 | PCP031508 | XM_009363474 |
| PCP031545 | 4,906890596 | 4,890933022 | 5,392317423 | 5,857980995 |           |              |
| PCP031557 | 5,087462841 | 5,59484709  | 5,129283017 | 4,414812061 | PCP031557 | XM_018645759 |
| PCP031640 | 6,584962501 | 6,718772592 | 6,781359714 | 7,247927513 | PCP031640 | XM_009363709 |
| PCP031656 | 6,303780748 | 6,750472519 | 6,431790083 | 7,044394119 |           |              |
| PCP031694 | 6,910852562 | 6,926829678 | 6,695854658 | 6,513016928 | PCP031694 | XM_009368583 |
| PCP031725 | 4,115199749 | 4,564987801 | 4,682011391 | 5,60496087  | PCP031725 | XM_009349846 |
| PCP031729 | 6,183288001 | 6,279285561 | 6,584962501 | 6,169925001 | PCP031729 | XM_018649110 |
| PCP031774 | 3,544732656 | 4,321928095 | 5,321928095 | 8           |           |              |
| PCP031923 | 6,564835417 | 6,60481265  | 6,794415866 | 7,273049587 | PCP031923 | XM_009359651 |
| PCP031955 | 6,820178962 | 6,634157606 | 7,285402219 | 6,574858391 | PCP031955 | XM_009370949 |
| PCP032009 | 4,604664415 | 4,544114402 | 5,437294331 | 6,209453366 |           |              |
| PCP032081 | 6,4374608   | 5,718909554 | 6,392317423 | 5,824513297 |           |              |
| PCP032149 | 6,392317423 | 6,594996337 | 6,634157606 | 6,303780748 |           |              |
| PCP032156 | 5,014801602 | 4,143230135 | 4,584962501 | 5,345893086 | PCP032156 | XM_018647921 |
| PCP032158 | 6,486553493 | 6,54951516  | 6,60481265  | 7,263691734 | PCP032158 | XM_009357478 |
| PCP032163 | 5,754887502 | 6,094447222 | 6,222456826 | 6,584962501 |           |              |
| PCP032181 | 6,718772592 | 6,345715709 | 6,24164954  | 5,763677142 | PCP032181 | XM_009348093 |
| PCP032198 | 6,824386003 | 5,938521046 | 6,737010678 | 5,746043983 | PCP032198 | XM_009373582 |
| PCP032222 | 7,199672345 | 7,231989133 | 6,695854658 | 6,087462841 | PCP032222 | XM_009376111 |
| PCP032223 | 4,222650022 | 4,459431619 | 7,06608919  | 5,64385619  | PCP032223 | XM_009376110 |
| PCP032241 | 5,309976492 | 5,115615931 | 5,832890014 | 6,777025123 | PCP032241 | XM_009365931 |
| PCP032244 | 5,930737338 | 6,24164954  | 6,64385619  | 6,64385619  | PCP032244 | XM_009368854 |
| PCP032254 | 6,624539604 | 6,481072857 | 6,203005338 | 5,746043983 | PCP032254 | XM_008368262 |
| PCP032282 | 5,727920455 | 5,984817174 | 6,266786541 | 6,906890596 | PCP032282 | XM_008359161 |
| PCP032339 | 7,029784146 | 6,714245518 | 6,291493053 | 5,946496941 | PCP032339 | XM_018643374 |
| PCP032440 | 4,604664415 | 5,309976492 | 6,254178286 | 7,173227395 | PCP032440 | NM_001294010 |
| PCP032497 | 6,882643049 | 6,60481265  | 6,176522247 | 5,709566354 | PCP032497 | XM_008376187 |
| PCP032535 | 7,132679654 | 6,882643049 | 6,554588852 | 5,681730355 | PCP032535 | XM_008356190 |
| PCP032561 | 5,754887502 | 5,087462841 | 4,115199749 | 6,080444483 | PCP032561 | XM_009337834 |
| PCP032573 | 6,247927513 | 6,448405435 | 6,599912842 | 7,022367813 | PCP032573 | XM_009359521 |
| PCP032619 | 6,215872703 | 7,058857621 | 6,745909573 | 6,497133304 | PCP032619 | XM_009363901 |
| PCP032628 | 6,357552005 | 6,454011343 | 6,163297449 | 6,129283017 |           |              |
| PCP032652 | 3,840966704 | 4,790250739 | 5,459431619 | 6,539158811 | PCP032652 | XR_525016    |
| PCP032702 | 6,732404887 | 6,745909573 | 6,691115365 | 6,448405435 | PCP032702 | XM_008390587 |
| PCP032785 | 7,044394119 | 6,700439718 | 6,981053471 | 6,64385619  | PCP032785 | XR_667498    |



|           |             |             |             |             |           |              |
|-----------|-------------|-------------|-------------|-------------|-----------|--------------|
| PCP032796 | 4,824258697 | 5,523561956 | 5,369117459 | 6,375039431 |           |              |
| PCP032837 | 5,129283017 | 5,882643049 | 6,24164954  | 7,101503009 | PCP032837 | XM_009380628 |
| PCP032952 | 6,554588852 | 6,189824559 | 6,431790083 | 5,807354922 | PCP032952 | XM_009352396 |
| PCP033062 | 5,369117459 | 4,938756261 | 5,502394256 | 4,502712486 | PCP033062 | XM_018649575 |
| PCP033105 | 5,60496087  | 5,59484709  | 5,77267747  | 4,985044962 | PCP033105 | XM_009353287 |
| PCP033108 | 6,709704193 | 7,101503009 | 6,882643049 | 6,714245518 |           |              |
| PCP033136 | 6,648609245 | 6,222456826 | 6,129283017 | 6,06608919  |           |              |
| PCP033141 | 6,759289016 | 6,351734323 | 6,72342204  | 7,279192684 | PCP033141 | XM_017333118 |
| PCP033156 | 6,007419784 | 5,663059924 | 5,681730355 | 6,481072857 |           |              |
| PCP033165 | 4,321928095 | 5,044394119 | 5,614709844 | 3,502075956 | PCP033165 | XM_009344361 |
| PCP033199 | 4,790250739 | 6,327866971 | 5,95419631  | 5,807354922 | PCP033199 | XM_018650071 |
| PCP033218 | 6,143026004 | 5,977279923 | 6,464831606 | 6,95419631  |           |              |
| PCP033244 | 5,48123435  | 5,977279923 | 6,309794644 | 6,841344192 | PCP033244 | XM_018650720 |
| PCP033300 | 6,06608919  | 6,491853096 | 6,38663853  | 5,882643049 | PCP033300 | XM_009338119 |
| PCP033326 | 6,80309785  | 6,448405435 | 7,212666605 | 6,559644763 | PCP033326 | XM_018651603 |
| PCP033329 | 6,375039431 | 5,584962501 | 5,260402093 | 5,142821844 | PCP033329 | XM_018645168 |
| PCP033400 | 6,392317423 | 6,459431619 | 6,890811455 | 7,142923928 | PCP033400 | XM_009380848 |
| PCP033442 | 6,47037417  | 6,209453366 | 6,50779464  | 6,898812977 | PCP033442 | XM_008391655 |
| PCP033563 | 5,832890014 | 5,857980995 | 6,297741678 | 6,759289016 | PCP033563 | XM_009375752 |
| PCP033647 | 5,653346693 | 5,415150205 | 5,807354922 | 6,279285561 | PCP033647 | XM_009353696 |
| PCP033648 | 6,38663853  | 6,176522247 | 5,946496941 | 4,969472865 | PCP033648 | XM_008370695 |
| PCP033726 | 5,415150205 | 4,969472865 | 5,014801602 | 4,272769732 | PCP033726 | XM_009339080 |
| PCP033744 | 4,938756261 | 5,297558281 | 5,285402219 | 6,07317756  | PCP033744 | XM_009358695 |
| PCP033795 | 7,497213158 | 6,727920455 | 6,84962403  | 5,984817174 | PCP033795 | XM_009342436 |
| PCP033816 | 6,022367813 | 6,080444483 | 6,321928095 | 5,533874777 |           |              |
| PCP033851 | 6,029673735 | 5,087462841 | 6,215872703 | 5,624393382 | PCP033851 | XM_009354290 |
| PCP033853 | 5,984817174 | 6,022367813 | 6,272956308 | 6,894817763 | PCP033853 | XM_008369695 |
| PCP033916 | 4,985044962 | 4,772413555 | 5,209453366 | 6,058965822 |           |              |
| PCP034042 | 5,763677142 | 5,653346693 | 5,470211457 | 5,129283017 | PCP034042 | XM_017334565 |
| PCP034075 | 6,189824559 | 6,196331634 | 6,686500527 | 6,272956308 | PCP034075 | XM_009370543 |
| PCP034119 | 7,022367813 | 6,790120385 | 6,772545519 | 6,528727582 | PCP034119 | XM_008341791 |
| PCP034142 | 6,080444483 | 5,930737338 | 6,143026004 | 6,87036472  |           |              |
| PCP034211 | 6,24164954  | 6,754887502 | 0           | 6,392317423 | PCP034211 | XM_008395566 |
| PCP034236 | 6,579994693 | 6,584962501 | 6,574858391 | 6,285402219 | PCP034236 | XM_009363511 |
| PCP034254 | 6,209453366 | 6,22881869  | 6,375039431 | 5,874551087 | PCP034254 | XR_664451    |
| PCP034318 | 6,136068312 | 5,798828178 | 5,882643049 | 5,513174885 | PCP034318 | XM_009347933 |
| PCP034378 | 6,662917555 | 6,156437068 | 6,297741678 | 6,051589621 | PCP034378 | XM_009376865 |
| PCP034410 | 7,183188734 | 7,21916852  | 6,815959618 | 6,235152624 | PCP034410 | XM_018643343 |
| PCP034420 | 4,824258697 | 3,906890596 | 5,448570626 | 4,624685811 | PCP034420 | XM_008389115 |
| PCP034514 | 4,459431619 | 4,824258697 | 4,890933022 | 5,969703088 | PCP034514 | XM_009378736 |
| PCP034515 | 5,101397952 | 5,297558281 | 5,64385619  | 6,50255338  | PCP034515 | XM_009378556 |
| PCP034521 | 5,02989455  | 4,682011391 | 4,95419631  | 5,77267747  | PCP034521 | XM_018643230 |
| PCP034522 | 6,459431619 | 6,431790083 | 6,051589621 | 5,832890014 | PCP034522 | XM_009369314 |
| PCP034529 | 0           | 8,950322598 | 10,34132979 | 0           | PCP034529 | XM_009381360 |
| PCP034635 | 5,115615931 | 5,437294331 | 6,108524457 | 6,857980995 | PCP034635 | XM_017334308 |
| PCP034690 | 6,321928095 | 6,824386003 | 6,68187088  | 7,369204723 | PCP034690 | XM_009342001 |

|           |             |             |             |             |           |              |
|-----------|-------------|-------------|-------------|-------------|-----------|--------------|
| PCP034759 | 5,169925001 | 5,691254979 | 5,709566354 | 6,380764075 | PCP034759 | XM_008341113 |
| PCP034770 | 5,273142859 | 5,77267747  | 5,156639311 | 4,604664415 |           |              |
| PCP034778 | 6,31596467  | 6,333960351 | 6,54426899  | 7,055282436 |           |              |
| PCP034796 | 6,321928095 | 6,279285561 | 6,554588852 | 6,984931073 | PCP034796 | XM_009344290 |
| PCP034934 | 7,282347131 | 0           | 5,938521046 | 5,584962501 |           |              |
| PCP035006 | 7,014913158 | 7,122362117 | 6,345715709 | 5,470211457 | PCP035006 | XM_018649737 |
| PCP035016 | 5,369117459 | 5,663059924 | 5,321928095 | 5           | PCP035016 | XM_008391948 |
| PCP035017 | 5,392317423 | 5,169925001 | 4,969472865 | 4,564987801 | PCP035017 | NM_001293872 |
| PCP035035 | 5,285402219 | 4,523561956 | 5,392317423 | 6,06608919  |           |              |
| PCP035049 | 6,890811455 | 6,727920455 | 7,429030064 | 6,414981143 | PCP035049 | XM_008390331 |
| PCP035076 | 6,297741678 | 5,857980995 | 6,50255338  | 6,99242856  | PCP035076 | XM_008387941 |
| PCP035077 | 5,874551087 | 5,832890014 | 5,992541859 | 5,345893086 | PCP035077 | XM_008387935 |
| PCP035083 | 5,977279923 | 6,442943496 | 5,754887502 | 6,832890014 |           |              |
| PCP035089 | 6,754887502 | 6,339850003 | 6,464831606 | 5,437294331 |           |              |
| PCP035104 | 5,101397952 | 5,235344128 | 5,380937195 | 4,369466484 |           |              |
| PCP035129 | 4,772413555 | 4,624685811 | 4,969472865 | 5,882643049 | PCP035129 | XM_008371310 |
| PCP035228 | 5,554588852 | 5,345893086 | 4,985044962 | 4,459431619 | PCP035228 | XR_002527554 |
| PCP035261 | 6,380764075 | 5,513174885 | 6,007419784 | 5,866166169 | PCP035261 | XM_009371520 |
| PCP035307 | 6,518377768 | 5,544423562 | 5,798828178 | 5,700439718 |           |              |
| PCP035341 | 5,653346693 | 5,392317423 | 6,50255338  | 6,614709844 |           |              |
| PCP035515 | 6,176522247 | 5,866166169 | 5,781359714 | 5,789990019 | PCP035515 | XM_018651445 |
| PCP035534 | 4,392317423 | 4,624685811 | 4,64385619  | 6,080444483 | PCP035534 | XM_009350195 |
| PCP035605 | 6,169925001 | 6           | 7,183188734 | 7,321928095 | PCP035605 | XM_009360876 |
| PCP035668 | 6,31596467  | 6,47037417  | 6,68187088  | 7,087462841 |           |              |
| PCP035673 | 5,992541859 | 6,357552005 | 5,832890014 | 6,965784285 | PCP035673 | XM_009343634 |
| PCP035678 | 7,098032083 | 6,624539604 | 6,922792504 | 6,397974049 | PCP035678 | XM_008342748 |
| PCP035715 | 5,584962501 | 5,906890596 | 3,058316496 | 7,526147081 |           |              |
| PCP035740 | 6,094447222 | 6,431790083 | 6,965784285 | 7,486473046 |           |              |
| PCP035757 | 7,062531903 | 6,910852562 | 6,599912842 | 6,156437068 | PCP035757 | XM_009344501 |
| PCP035847 | 5,763677142 | 6,015024705 | 6,303780748 | 6,68187088  | PCP035847 | XM_009379265 |
| PCP035853 | 6,129283017 | 7,910912508 | 6,902917719 | 5,992541859 | PCP035853 | XM_009336163 |
| PCP035855 | 6,95419631  | 6,183288001 | 6,841344192 | 5,718909554 |           |              |
| PCP035894 | 4,392317423 | 6,807354922 | 5,115615931 | 5,209453366 | PCP035894 | XM_009365630 |
| PCP035897 | 5,392317423 | 4,502712486 | 4,143230135 | 4,222650022 |           |              |
| PCP035975 | 6,029673735 | 6,64385619  | 6,129283017 | 5,95419631  | PCP035975 | XM_009358818 |
| PCP036026 | 5,691254979 | 6,918863237 | 6,209453366 | 7,536596918 | PCP036026 | XM_009361494 |
| PCP036027 | 6,523561956 | 5,321928095 | 5,938521046 | 5,59484709  |           |              |
| PCP036084 | 6,68187088  | 6,481072857 | 5,930737338 | 5,634302842 | PCP036084 | XM_018644892 |
| PCP036101 | 5,691254979 | 5,222263604 | 5,309976492 | 4,564987801 | PCP036101 | XM_008360760 |
| PCP036104 | 6,285402219 | 6,044394119 | 6,50255338  | 6,029673735 |           |              |
| PCP036113 | 6,209453366 | 5,890689878 | 5,781359714 | 5,044394119 |           |              |
| PCP036199 | 6,380764075 | 5,653346693 | 4,841469999 | 4,222650022 |           |              |
| PCP036246 | 6,363346321 | 6,129283017 | 6           | 5,309976492 | PCP036246 | XM_009349165 |
| PCP036314 | 6,464831606 | 5,874551087 | 6,420718183 | 6,794415866 | PCP036314 | XM_009350780 |
| PCP036333 | 5,321928095 | 5,415150205 | 5,129283017 | 6,235152624 | PCP036333 | XM_009342526 |
| PCP036351 | 4,807354922 | 5,073391816 | 5,209453366 | 4           | PCP036351 | XR_001786627 |

|           |             |             |             |             |           |              |
|-----------|-------------|-------------|-------------|-------------|-----------|--------------|
| PCP036394 | 3,700439718 | 4,414812061 | 4,662775172 | 5,415150205 | PCP036394 | XM_009346019 |
| PCP036429 | 4,297925053 | 5,260402093 | 6,22881869  | 10,31212284 | PCP036429 | XM_009352525 |
| PCP036493 | 6,639087423 | 6,260590275 | 6,691115365 | 7,309885571 | PCP036493 | XM_009378139 |
| PCP036507 | 6,222456826 | 6,115407855 | 6,215872703 | 6,95419631  | PCP036507 | XM_009358782 |
| PCP036553 | 4,584962501 | 4,857980995 | 4,874305166 | 3,906890596 |           |              |
| PCP036630 | 6,589913261 | 6,196331634 | 6,648609245 | 7,018700931 | PCP036630 | XM_009353511 |
| PCP036659 | 5,815831566 | 5,718909554 | 5,849749117 | 5,247927513 | PCP036659 | XM_009346249 |
| PCP036665 | 5,48123435  | 4,754887502 | 6,841344192 | 5,824513297 |           |              |
| PCP036671 | 5,073391816 | 5,437294331 | 5,663059924 | 6,414981143 | PCP036671 | XM_009357986 |
| PCP036745 | 4,297925053 | 4,874305166 | 5,209453366 | 5,48123435  | PCP036745 | XM_018646342 |
| PCP036775 | 5,309976492 | 5,345893086 | 5,415150205 | 4,682011391 |           |              |
| PCP036776 | 5,523561956 | 4,624685811 | 4,414812061 | 4,143230135 | PCP036776 | XM_009340997 |
| PCP036792 | 5,209453366 | 5,890689878 | 6,333960351 | 5,523561956 | PCP036792 | XM_018642698 |
| PCP036927 | 5,681730355 | 5,890689878 | 6,101608059 | 6,938638658 |           |              |
| PCP036959 | 5,544423562 | 5           | 6,044394119 | 4,985044962 |           |              |
| PCP037077 | 4,414812061 | 4,624685811 | 5,058749412 | 5,59484709  | PCP037077 | XM_008349165 |
| PCP037108 | 6,136068312 | 5,992541859 | 6,03716255  | 5,491853096 |           |              |
| PCP037161 | 4,969472865 | 5,491853096 | 5,807354922 | 6,890811455 |           |              |
| PCP037187 | 6,431790083 | 5,781359714 | 6,50779464  | 7,582480735 | PCP037187 | XM_009361324 |
| PCP037250 | 5,653346693 | 4,754887502 | 4,906890596 | 4,459431619 | PCP037250 | XM_009378762 |
| PCP037280 | 5,196528361 | 4,437627248 | 4,890933022 | 5,564683017 | PCP037280 | XM_009340519 |
| PCP037403 | 4,718635616 | 4,682011391 | 5,285402219 | 5,866166169 |           |              |
| PCP037429 | 6,297741678 | 5,209453366 | 5,426264755 | 4,564987801 | PCP037429 | XM_009373848 |
| PCP037461 | 5,700439718 | 5,544423562 | 6,579994693 | 6,38663853  |           |              |
| PCP037491 | 5,437294331 | 4,824258697 | 5,101397952 | 4,523561956 | PCP037491 | XM_009354560 |
| PCP037519 | 5,700439718 | 6,07317756  | 6,333960351 | 6,934634441 | PCP037519 | XM_008390524 |
| PCP037579 | 4,624685811 | 4,95419631  | 5,235344128 | 6,07317756  | PCP037579 | XM_008379822 |
| PCP037601 | 6,442943496 | 5,554588852 | 6,431790083 | 6,475733431 |           |              |
| PCP037736 | 5,502394256 | 5,48123435  | 5,763677142 | 6,47037417  |           |              |
| PCP037739 | 5,57500972  | 5,815831566 | 4,938756261 | 6,094447222 |           |              |
| PCP037774 | 4,824258697 | 5,260402093 | 4,624685811 | 3,874796966 | PCP037774 | XM_017336419 |
| PCP037782 | 6,922792504 | 6,534030467 | 6,745909573 | 6,14974712  | PCP037782 | XM_009348980 |
| PCP037826 | 5,357552005 | 4,790250739 | 5,058749412 | 4,34553831  |           |              |
| PCP037843 | 6,029673735 | 6,247927513 | 5,946496941 | 5,624393382 | PCP037843 | XM_009336632 |
| PCP037858 | 6,853870927 | 6,513016928 | 6,518377768 | 6,24164954  | PCP037858 | XM_009356574 |
| PCP037875 | 5,815831566 | 5,754887502 | 5,938521046 | 5,209453366 |           |              |
| PCP037899 | 5,832890014 | 5,584962501 | 5,222263604 | 4,824258697 | PCP037899 | XM_008392165 |
| PCP038003 | 5,984817174 | 6,176522247 | 6,403778984 | 6,750472519 | PCP038003 | XM_008380489 |
| PCP038054 | 7,30679083  | 6,68187088  | 6,902917719 | 6,464831606 | PCP038054 | XM_009345707 |
| PCP038062 | 5,969703088 | 6,31596467  | 6,518377768 | 7,312882955 | PCP038062 | XM_009373172 |
| PCP038107 | 6,569855608 | 6,235152624 | 5,992541859 | 7,014913158 |           |              |
| PCP038130 | 6,203005338 | 5,746043983 | 6,4374608   | 6,609843592 | PCP038130 | XM_009363489 |
| PCP038179 | 6,54426899  | 6,209453366 | 6,4374608   | 5,614709844 | PCP038179 | XM_009362983 |
| PCP038289 | 7,076815597 | 7,051698368 | 6,910852562 | 6,403778984 |           |              |
| PCP038330 | 5,736875423 | 6,136068312 | 6,051589621 | 6,54951516  |           |              |
| PCP038362 | 6,351734323 | 6,06608919  | 6,357552005 | 6,87036472  | PCP038362 | XM_009356434 |

|           |             |             |             |             |           |              |
|-----------|-------------|-------------|-------------|-------------|-----------|--------------|
| PCP038443 | 6,497133304 | 5,890689878 | 5,832890014 | 6,122465658 |           |              |
| PCP038541 | 5,087462841 | 4,824258697 | 4,874305166 | 3,807354922 | PCP038541 | XM_018642965 |
| PCP038578 | 6,136068312 | 6,094447222 | 6,24164954  | 5,222263604 | PCP038578 | XM_008347294 |
| PCP038603 | 6,279285561 | 5,938521046 | 6,209453366 | 5,48123435  | PCP038603 | XM_009378940 |
| PCP038644 | 6,169925001 | 6,513016928 | 6,653490009 | 7,176621973 | PCP038644 | XR_001953877 |
| PCP038646 | 0           | 6,431790083 | 5,969703088 | 6,176522247 |           |              |
| PCP038749 | 6,431790083 | 6,648609245 | 6,662917555 | 7,101503009 |           |              |
| PCP038754 | 5,906890596 | 5,59484709  | 5,59484709  | 5,247927513 | PCP038754 | XM_009352741 |
| PCP038815 | 6,247927513 | 6,442943496 | 6,768184325 | 7,193081765 | PCP038815 | XM_009339659 |
| PCP038906 | 6,414981143 | 6,087462841 | 6,38663853  | 7,17990909  | PCP038906 | XR_001952858 |
| PCP038921 | 6,351734323 | 5,77267747  | 6,272956308 | 6,574858391 | PCP038921 | XM_008356679 |
| PCP038971 | 5,64385619  | 5,415150205 | 5,448570626 | 4,857980995 |           |              |
| PCP038985 | 5,209453366 | 4,662775172 | 4,584962501 | 4,459431619 | PCP038985 | XM_009365894 |
| PCP039015 | 5,196528361 | 4,392317423 | 6,614709844 | 6,351734323 | PCP039015 | XM_009343871 |
| PCP039029 | 4,857980995 | 5,169925001 | 5,196528361 | 6,136068312 | PCP039029 | XM_009369477 |
| PCP039030 | 6,648609245 | 6,321928095 | 6,754887502 | 6,080444483 | PCP039030 | XM_009369481 |
| PCP039156 | 6,06608919  | 6,169925001 | 6,285402219 | 6,97349648  | PCP039156 | XM_008348513 |
| PCP039180 | 4,297925053 | 5           | 5,058749412 | 5,691254979 |           |              |
| PCP039220 | 6,14974712  | 5,946496941 | 6,321928095 | 6,759289016 |           |              |
| PCP039241 | 5,736875423 | 6,051589621 | 5,754887502 | 7,139551352 |           |              |
| PCP039252 | 5,614709844 | 6,260590275 | 6,108524457 | 6,481072857 |           |              |
| PCP039326 | 5,285402219 | 5,369117459 | 5,77267747  | 6,38663853  | PCP039326 | XM_017325570 |
| PCP039396 | 6,380764075 | 6,464831606 | 6,790120385 | 7,14974712  | PCP039396 | XM_018647276 |
| PCP039433 | 5,196528361 | 5,309976492 | 4,682011391 | 4,321928095 | PCP039433 | XM_009346343 |
| PCP039472 | 7,212666605 | 7,142923928 | 6,50255338  | 5,95419631  | PCP039472 | XM_009377143 |
| PCP039487 | 5,874551087 | 6,375039431 | 6,07317756  | 5,653346693 |           |              |
| PCP039501 | 5,709566354 | 6,07317756  | 6,266786541 | 5,672425342 | PCP039501 | XM_008391488 |
| PCP039516 | 6,339850003 | 6,03716255  | 6,07317756  | 5,898933872 | PCP039516 | XM_009356629 |
| PCP039566 | 6,380764075 | 6,624539604 | 6,285402219 | 6,101608059 |           |              |
| PCP039588 | 6,285402219 | 6,732404887 | 6,832890014 | 7,215969746 | PCP039588 | XM_009340611 |
| PCP039591 | 6,094447222 | 6,07317756  | 6,369291982 | 7,238404739 | PCP039591 | XM_009357640 |
| PCP039602 | 5,321928095 | 4,938756261 | 5,014801602 | 5,984817174 |           |              |
| PCP039628 | 6,321928095 | 6,38663853  | 6,727920455 | 7,169925001 | PCP039628 | XM_008343792 |
| PCP039774 | 5,691254979 | 5,115615931 | 5,533874777 | 5,073391816 |           |              |
| PCP039793 | 3,938285792 | 4,624685811 | 5,169925001 | 5,357552005 | PCP039793 | XM_009346960 |
| PCP039891 | 6,594996337 | 6,54426899  | 6,448405435 | 7,156538193 | PCP039891 | XM_008339713 |
| PCP039914 | 4           | 4,480911346 | 5,369117459 | 5,448570626 | PCP039914 | XM_008384790 |
| PCP039919 | 6,222456826 | 6,695854658 | 6,369291982 | 6,934634441 | PCP039919 | XM_009337073 |
| PCP039958 | 5,922911406 | 6,156437068 | 6,321928095 | 7,087462841 | PCP039958 | XM_009338267 |
| PCP039969 | 6,14974712  | 6,291493053 | 6,380764075 | 5,938521046 |           |              |
| PCP040080 | 6,051589621 | 5,882643049 | 5,798828178 | 5,285402219 |           |              |
| PCP040171 | 3,544732656 | 3,969933275 | 4,841469999 | 6,022367813 |           |              |
| PCP040196 | 6,333960351 | 5,634302842 | 5,426264755 | 5,142821844 | PCP040196 | XM_018642571 |
| PCP040256 | 6,431790083 | 5,77267747  | 5,309976492 | 4,718635616 |           |              |
| PCP040275 | 6,790120385 | 5,866166169 | 6,815959618 | 6,486553493 | PCP040275 | XM_009359179 |
| PCP040424 | 5,736875423 | 6,094447222 | 6,333960351 | 6,653490009 | PCP040424 | XM_009373064 |

|           |             |             |             |             |           |              |
|-----------|-------------|-------------|-------------|-------------|-----------|--------------|
| PCP040427 | 4,297925053 | 4,459431619 | 4,807354922 | 5,614709844 | PCP040427 | XM_009373205 |
| PCP040458 | 6,475733431 | 6,420718183 | 6,794415866 | 7,222360218 |           |              |
| PCP040472 | 6,584962501 | 6,481072857 | 6,357552005 | 6,950351762 | PCP040472 | XR_001792061 |
| PCP040626 | 5,984817174 | 6,209453366 | 6,599912842 | 6,759289016 | PCP040626 | XM_009354707 |
| PCP040635 | 6,464831606 | 6,539158811 | 6,62935662  | 7,115511897 | PCP040635 | XM_009367582 |
| PCP040639 | 6,574858391 | 6,464831606 | 6,691115365 | 7,156538193 |           |              |
| PCP040670 | 6,235152624 | 5,624393382 | 5,614709844 | 4,874305166 | PCP040670 | XM_009339080 |
| PCP040696 | 6,486553493 | 6,363346321 | 6,022367813 | 5,533874777 | PCP040696 | XM_009376013 |
| PCP040724 | 5,961854808 | 5,129283017 | 5,470211457 | 5,142821844 |           |              |
| PCP040727 | 5,209453366 | 5,369117459 | 5,815831566 | 8,820178962 | PCP040727 | XM_009353702 |
| PCP040779 | 5,930737338 | 6,414981143 | 5,437294331 | 5,815831566 | PCP040779 | XR_001952614 |
| PCP040790 | 5,672425342 | 5,946496941 | 5,906890596 | 6,47037417  | PCP040790 | XM_009349959 |
| PCP040797 | 6,807354922 | 7,115511897 | 6,705010253 | 6,403778984 | PCP040797 | XM_008388036 |
| PCP040799 | 6,513016928 | 6,759289016 | 6,285402219 | 5,969703088 | PCP040799 | XM_008375940 |
| PCP040846 | 7,409390936 | 6,309794644 | 5,984817174 | 6,272956308 | PCP040846 | XM_009356338 |
| PCP040923 | 6,759289016 | 6,745909573 | 7,087462841 | 6,54951516  | PCP040923 | XM_009377254 |
| PCP040946 | 5,898933872 | 5,564683017 | 6,015024705 | 6,442943496 | PCP040946 | XM_018645208 |
| PCP040990 | 6,695854658 | 6,714245518 | 6,38663853  | 6,260590275 | PCP040990 | XM_017334565 |
| PCP041018 | 4,985044962 | 5,101397952 | 5,544423562 | 6,101608059 | PCP041018 | XM_009371261 |
| PCP041054 | 6,297741678 | 5,700439718 | 4,790250739 | 3,321928095 | PCP041054 | XM_008390910 |
| PCP041094 | 4,115199749 | 3,772941338 | 4,34553831  | 6           |           |              |
| PCP041151 | 7,139551352 | 6,754887502 | 6,523561956 | 6,539158811 | PCP041151 | XM_009361839 |
| PCP041159 | 6,397974049 | 6,497133304 | 6,68187088  | 7,156538193 | PCP041159 | XM_009356443 |
| PCP041160 | 5,815831566 | 6,414981143 | 6,392317423 | 6,080444483 | PCP041160 | XM_009377240 |
| PCP041184 | 6,291493053 | 6,599912842 | 6,459431619 | 6,981053471 | PCP041184 | XM_009366762 |
| PCP041194 | 7,101503009 | 6,569855608 | 6,950351762 | 6,491853096 | PCP041194 | XM_018644645 |
| PCP041212 | 6,491853096 | 6,54426899  | 7,058857621 | 6,569855608 | PCP041212 | XM_008351045 |
| PCP041281 | 7,026025399 | 6,454011343 | 6,339850003 | 6,81159947  |           |              |
| PCP041284 | 5,906890596 | 5,614709844 | 5,392317423 | 5,142821844 | PCP041284 | XM_018645961 |
| PCP041305 | 6,291493053 | 6,339850003 | 6,62935662  | 6,981053471 | PCP041305 | XM_009377229 |
| PCP041338 | 5,849749117 | 6,058965822 | 6,54426899  | 6,080444483 | PCP041338 | XM_009343067 |
| PCP041393 | 6,351734323 | 6,750472519 | 3,772941338 | 6,459431619 |           |              |
| PCP041397 | 5,922911406 | 6,84962403  | 0           | 6,080444483 | PCP041397 | XM_018646306 |
| PCP041446 | 5,691254979 | 6,143026004 | 6,369291982 | 7,047996356 | PCP041446 | XM_009336296 |
| PCP041462 | 6,554588852 | 7,412188747 | 6,910852562 | 6,297741678 | PCP041462 | XM_017330039 |
| PCP041581 | 6,653490009 | 6,497133304 | 6,639087423 | 5,789990019 | PCP041581 | XM_008386843 |
| PCP041656 | 5,513174885 | 5,044394119 | 5,156639311 | 4,459431619 | PCP041656 | XM_017325002 |
| PCP041680 | 5,832890014 | 5,95419631  | 6,392317423 | 6,930737338 | PCP041680 | XM_009362655 |
| PCP041759 | 5,754887502 | 5,727920455 | 5,523561956 | 4,874305166 | PCP041759 | XM_009361527 |
| PCP041786 | 5,977279923 | 5,169925001 | 5,59484709  | 5,285402219 |           |              |
| PCP041803 | 5,073391816 | 4,807354922 | 5,59484709  | 5,874551087 | PCP041803 | XM_009347529 |
| PCP041881 | 6,080444483 | 6,03716255  | 5,906890596 | 5,448570626 | PCP041881 | XM_008352712 |
| PCP041890 | 6,31596467  | 6,321928095 | 6,579994693 | 7,196430001 | PCP041890 | XM_009353206 |
| PCP041893 | 6,539158811 | 5,321928095 | 4,272769732 | 4,169925001 | PCP041893 | XM_009351230 |
| PCP041901 | 6,247927513 | 6,481072857 | 7,577428828 | 6,609843592 | PCP041901 | XR_001953108 |
| PCP041912 | 7,209453366 | 6,996275749 | 6,99242856  | 6,196331634 | PCP041912 | XM_009337260 |

|           |             |             |             |             |           |              |
|-----------|-------------|-------------|-------------|-------------|-----------|--------------|
| PCP041929 | 6,732404887 | 5,969703088 | 6,619559738 | 6,820178962 | PCP041929 | XM_008364741 |
| PCP041992 | 5,523561956 | 5,196528361 | 5,415150205 | 4,437627248 | PCP041992 | XM_009359146 |
| PCP041993 | 7,42063398  | 7,276124405 | 6,890811455 | 5,614709844 | PCP041993 | XM_009359145 |
| PCP041994 | 6,718772592 | 6,700439718 | 6,486553493 | 3,321928095 | PCP041994 | XM_009342677 |
| PCP042006 | 6,297741678 | 6,448405435 | 6,554588852 | 7,073284692 |           |              |
| PCP042045 | 5,906890596 | 6,196331634 | 6,790120385 | 6,857980995 | PCP042045 | XM_009378580 |
| PCP042050 | 6,464831606 | 6,163297449 | 5,634302842 | 4,874305166 | PCP042050 | XM_009364490 |
| PCP042076 | 7,189824559 | 6,890811455 | 6,837060204 | 6,196331634 | PCP042076 | XM_009355503 |
| PCP042176 | 5,169925001 | 5,415150205 | 5,634302842 | 6,363346321 |           |              |
| PCP042194 | 7,327956767 | 7,026025399 | 7,260496187 | 5,60496087  | PCP042194 | XR_001791541 |
| PCP042220 | 5,297558281 | 4,754887502 | 5,691254979 | 6,50779464  | PCP042220 | XM_009337436 |
| PCP042226 | 6,247927513 | 6,564835417 | 6,136068312 | 5,961854808 | PCP042226 | XM_009345937 |
| PCP042259 | 6,24164954  | 5,709566354 | 6,4374608   | 6,619559738 | PCP042259 | XM_009367927 |
| PCP042271 | 6,414981143 | 6,589913261 | 6,564835417 | 7,183188734 | PCP042271 | XM_009368086 |
| PCP042280 | 6,051589621 | 6,189824559 | 6,266786541 | 6,890811455 | PCP042280 | NM_001300877 |
| PCP042320 | 5,815831566 | 0           | 5,824513297 | 6,475733431 | PCP042320 | XM_009356405 |
| PCP042395 | 6,044394119 | 4,790250739 | 6,475733431 | 6,798698597 | PCP042395 | XM_008390952 |
| PCP042402 | 6,714245518 | 6,189824559 | 6,080444483 | 5,807354922 | PCP042402 | XM_009368318 |
| PCP042490 | 5,634302842 | 6,122465658 | 6,108524457 | 6,837060204 | PCP042490 | XM_009362596 |
| PCP042501 | 6,272956308 | 6,06608919  | 6,303780748 | 6,841344192 |           |              |
| PCP042508 | 5,196528361 | 4,95419631  | 5,64385619  | 6,420718183 | PCP042508 | XM_008352409 |
| PCP042528 | 6,143026004 | 6,235152624 | 6,862079387 | 6,392317423 | PCP042528 | XM_008349227 |
| PCP042536 | 4,969472865 | 5,634302842 | 5,874551087 | 5,938521046 |           |              |
| PCP042607 | 6,183288001 | 6,176522247 | 5,614709844 | 4,969472865 | PCP042607 | XM_009354543 |
| PCP042715 | 5,634302842 | 5,380937195 | 5,448570626 | 5           |           |              |
| PCP042737 | 6,333960351 | 3,772941338 | 6,754887502 | 6,648609245 | PCP042737 | XM_009351697 |
| PCP042765 | 6,380764075 | 6,574858391 | 6,737010678 | 7,073284692 | PCP042765 | XM_009380498 |
| PCP042778 | 6,653490009 | 6,528727582 | 6,333960351 | 6,303780748 | PCP042778 | XM_017336556 |
| PCP042794 | 5,470211457 | 5,554588852 | 5,882643049 | 6,303780748 | PCP042794 | XM_018647467 |
| PCP042801 | 6,397974049 | 6,54426899  | 6,397974049 | 7,076815597 | PCP042801 | XM_009358091 |
| PCP042826 | 6,454011343 | 6,136068312 | 6,080444483 | 6           |           |              |
| PCP042882 | 6,272956308 | 6,695854658 | 6,409390936 | 6,14974712  |           |              |
| PCP043031 | 5,321928095 | 4,922673593 | 5,653346693 | 6,420718183 | PCP043031 | XM_009335653 |
| PCP043048 | 6,741466986 | 6,080444483 | 6,481072857 | 6,24164954  |           |              |
| PCP043062 | 5,073391816 | 5,672425342 | 4,480911346 | 6,101608059 |           |              |
| PCP043093 | 5,357552005 | 5,209453366 | 5,95419631  | 6,619559738 | PCP043093 | XM_009346497 |
| PCP043114 | 5,969703088 | 5,718909554 | 5,544423562 | 5,273142859 | PCP043114 | XM_008368766 |
| PCP043116 | 7,589988142 | 7,639015048 | 6,845490051 | 0           |           |              |
| PCP043120 | 5,882643049 | 4,906890596 | 6,087462841 | 5,156639311 |           |              |
| PCP043157 | 6,518377768 | 6,853870927 | 6,662917555 | 6,215872703 |           |              |
| PCP043214 | 5,392317423 | 5,857980995 | 6,163297449 | 6,285402219 |           |              |
| PCP043215 | 6,634157606 | 6,279285561 | 6,763809907 | 7,269874722 | PCP043215 | XM_008387771 |
| PCP043241 | 8,318904285 | 6,007419784 | 6,589913261 | 6,594996337 |           |              |
| PCP043243 | 5,60496087  | 5,403608584 | 5,169925001 | 4,64385619  | PCP043243 | XM_009345176 |
| PCP043256 | 6,781359714 | 6,599912842 | 6,31596467  | 5,459431619 |           |              |
| PCP043307 | 6,044394119 | 5,60496087  | 6,058965822 | 5,554588852 | PCP043307 | XM_018651438 |

|           |             |             |             |             |           |              |
|-----------|-------------|-------------|-------------|-------------|-----------|--------------|
| PCP043342 | 5,156639311 | 4,143230135 | 4,73714592  | 4,272769732 | PCP043342 | XM_008381218 |
| PCP043369 | 6,513016928 | 6,62935662  | 6,691115365 | 7,199672345 | PCP043369 | XM_009341615 |
| PCP043409 | 6,007419784 | 5,718909554 | 5,554588852 | 5,426264755 |           |              |
| PCP043442 | 5,285402219 | 4,502712486 | 4,718635616 | 4,414812061 | PCP043442 | XM_017335132 |
| PCP043461 | 6,564835417 | 6,700439718 | 6,794415866 | 7,327956767 | PCP043461 | XM_009362215 |
| PCP043632 | 4           | 4,34553831  | 4,874305166 | 5,369117459 | PCP043632 | XM_018649592 |
| PCP043663 | 6,203005338 | 5,57500972  | 5,02989455  | 4,64385619  |           |              |
| PCP043751 | 5,470211457 | 5,235344128 | 5,781359714 | 6,235152624 | PCP043751 | XM_008351567 |
| PCP043765 | 6,705010253 | 6,832890014 | 6,609843592 | 6,420718183 |           |              |
| PCP043823 | 5,544423562 | 6,297741678 | 6,996275749 | 7,684187561 | PCP043823 | XM_018642618 |
| PCP043857 | 5,890689878 | 6,058965822 | 6,327866971 | 5,727920455 | PCP043857 | XM_008364922 |
| PCP043912 | 5,448570626 | 5,101397952 | 5,523561956 | 4,584962501 | PCP043912 | XM_009366467 |
| PCP043937 | 6,291493053 | 6,790120385 | 6,579994693 | 5,946496941 | PCP043937 | XM_009350706 |
| PCP043963 | 5,798828178 | 5,624393382 | 5,426264755 | 5,156639311 | PCP043963 | XM_009359085 |
| PCP043986 | 5,297558281 | 5,906890596 | 5,841218374 | 6,38663853  | PCP043986 | XM_009368536 |
| PCP043988 | 6,614709844 | 5,992541859 | 6,058965822 | 5,260402093 | PCP043988 | XM_017334373 |
| PCP044001 | 4,414812061 | 4,480911346 | 4,874305166 | 5,718909554 | PCP044001 | XM_009347025 |
| PCP044003 | 5,142821844 | 4,624685811 | 4,247927513 | 5,746043983 | PCP044003 | XM_009338374 |
| PCP044007 | 5,992541859 | 6,60481265  | 6,209453366 | 6,686500527 | PCP044007 | XM_017336489 |
| PCP044044 | 6,31596467  | 5,938521046 | 5,64385619  | 5,874551087 | PCP044044 | XM_008372563 |
| PCP044049 | 4,321928095 | 4,544114402 | 4,857980995 | 5,564683017 | PCP044049 | XM_009341631 |
| PCP044070 | 6,101608059 | 5,969703088 | 5,992541859 | 4,874305166 | PCP044070 | XM_009357766 |
| PCP044086 | 4,584962501 | 4,624685811 | 5,357552005 | 6,890811455 | PCP044086 | XM_009376463 |
| PCP044091 | 5,129283017 | 5,392317423 | 5,634302842 | 6,101608059 |           |              |
| PCP044092 | 5,922911406 | 5,781359714 | 6,14974712  | 7,115511897 |           |              |
| PCP044109 | 5,938521046 | 6,47037417  | 5,798828178 | 6,015024705 | PCP044109 | XM_008387872 |
| PCP044118 | 5,321928095 | 5,866166169 | 6,777025123 | 7,375039431 | PCP044118 | XM_018645358 |
| PCP044121 | 6,058965822 | 5,02989455  | 5,235344128 | 5,938521046 | PCP044121 | XM_008352516 |
| PCP044137 | 6,101608059 | 6,564835417 | 6,50779464  | 6,841344192 | PCP044137 | XM_009371005 |
| PCP044152 | 4,754887502 | 5,403608584 | 5,470211457 | 5,914803677 | PCP044152 | XM_008362692 |
| PCP044154 | 5,969703088 | 6,303780748 | 6,459431619 | 6,996275749 | PCP044154 | XM_008395057 |
| PCP044162 | 6,837060204 | 6,176522247 | 6,491853096 | 7,225641265 | PCP044162 | XM_009342170 |
| PCP044193 | 4,169925001 | 5,763677142 | 5,101397952 | 6,260590275 | PCP044193 | XR_667243    |
| PCP044314 | 5,309976492 | 5,672425342 | 6,279285561 | 6,86628983  | PCP044314 | XM_008361622 |
| PCP044329 | 6,403778984 | 6,22881869  | 6,624539604 | 7,153095972 | PCP044329 | XM_008370492 |
| PCP044330 | 6,768184325 | 6,464831606 | 6,68187088  | 6,339850003 | PCP044330 | XM_009353946 |
| PCP044344 | 5,634302842 | 5,533874777 | 5,544423562 | 4,906890596 | PCP044344 | XM_009353184 |
| PCP044345 | 5,101397952 | 5,984817174 | 5,554588852 | 6,07317756  | PCP044345 | XM_009336486 |
| PCP044349 | 6,044394119 | 6,094447222 | 5,789990019 | 5,273142859 | PCP044349 | XM_009348559 |
| PCP044372 | 6,22881869  | 6,397974049 | 6,894817763 | 7,462134139 | PCP044372 | XM_008378545 |
| PCP044399 | 7,040782866 | 6,554588852 | 6,727920455 | 6,363346321 | PCP044399 | XM_009367896 |
| PCP044458 | 5,415150205 | 4,969472865 | 5,196528361 | 4,321928095 | PCP044458 | XM_017332682 |
| PCP044462 | 5,969703088 | 6,044394119 | 6,584962501 | 6,965784285 | PCP044462 | XM_018650005 |
| PCP044468 | 6,351734323 | 6,06608919  | 6,609843592 | 7,122362117 | PCP044468 | XM_009335630 |
| PCP044472 | 5,273142859 | 4,64385619  | 4,369466484 | 4,437627248 | PCP044472 | XR_001953351 |
| PCP044482 | 6,247927513 | 6,357552005 | 6,327866971 | 6,958030641 |           |              |

|           |             |             |             |             |           |              |
|-----------|-------------|-------------|-------------|-------------|-----------|--------------|
| PCP044487 | 6,910852562 | 7,044394119 | 6,051589621 | 6,136068312 | PCP044487 | XM_009366643 |
| PCP044492 | 4,523561956 | 3,906890596 | 4,459431619 | 5,333781501 |           |              |
| PCP044494 | 5,02989455  | 5,247927513 | 5,906890596 | 7,163196797 | PCP044494 | XM_009365070 |
| PCP044497 | 5           | 5,087462841 | 5,297558281 | 6,03716255  | PCP044497 | XM_009344385 |
| PCP044503 | 6,321928095 | 6,31596467  | 6,115407855 | 5,798828178 | PCP044503 | XM_009348006 |
| PCP044507 | 6,705010253 | 6,528727582 | 6,64385619  | 6,31596467  | PCP044507 | XM_009337931 |
| PCP044528 | 4,772413555 | 5,874551087 | 5,992541859 | 6,215872703 | PCP044528 | XM_009376174 |
| PCP044536 | 5,183089461 | 4,969472865 | 5,653346693 | 4,700439718 |           |              |
| PCP044539 | 5,874551087 | 5,789990019 | 6,497133304 | 7,073284692 | PCP044539 | XM_021975909 |
| PCP044596 | 5,60496087  | 6           | 5,977279923 | 6,559644763 | PCP044596 | XM_009347218 |
| PCP044598 | 5,984817174 | 6,464831606 | 7,142923928 | 7,46760555  | PCP044598 | XM_018647026 |
| PCP044606 | 6,886672074 | 6,781359714 | 6,841344192 | 6,409390936 | PCP044606 | XM_009348505 |
| PCP044628 | 4,95419631  | 5,087462841 | 4,969472865 | 4,169925001 |           |              |
| PCP044671 | 6,38663853  | 6,50779464  | 6,672425342 | 7,357552005 | PCP044671 | XM_009367573 |
| PCP044687 | 6,06608919  | 5,426264755 | 4,544114402 | 3           |           |              |
| PCP044694 | 5,789990019 | 4,874305166 | 4,584962501 | 3,459431619 | PCP044694 | XM_009365818 |
| PCP044707 | 7,087462841 | 6,589913261 | 6,874428132 | 6,68187088  | PCP044707 | NM_001328854 |
| PCP044713 | 5           | 4,807354922 | 5,260402093 | 4,029452886 | PCP044713 | XM_009359904 |
| PCP044765 | 5,672425342 | 6,03716255  | 5,841218374 | 6,564835417 |           |              |
| PCP044766 | 5,95419631  | 5,798828178 | 5,235344128 | 3,840966704 | PCP044766 | NM_001302310 |
| PCP044801 | 6,431790083 | 5,64385619  | 5,946496941 | 4,807354922 |           |              |
| PCP044810 | 4,34553831  | 4,95419631  | 5,426264755 | 4,604664415 | PCP044810 | XM_009343629 |
| PCP044816 | 6,72342204  | 5,691254979 | 6,06608919  | 5,297558281 | PCP044816 | XM_009361395 |
| PCP044865 | 5,832890014 | 5,663059924 | 5,841218374 | 6,497133304 | PCP044865 | XM_009354021 |
| PCP044917 | 5,044394119 | 5,357552005 | 5,142821844 | 6,015024705 |           |              |
| PCP044920 | 5,101397952 | 5,369117459 | 5,77267747  | 5           |           |              |
| PCP044935 | 6,108524457 | 5,209453366 | 5,309976492 | 5,448570626 | PCP044935 | XM_009353642 |
| PCP044949 | 6,209453366 | 6,363346321 | 6,714245518 | 7,101503009 |           |              |
| PCP044952 | 5,59484709  | 5,700439718 | 5,700439718 | 6,459431619 |           |              |
| PCP044972 | 5,273142859 | 5,984817174 | 6,303780748 | 7,132679654 | PCP044972 | XM_009343338 |
| PCP044973 | 6,414981143 | 6,448405435 | 6,380764075 | 6,094447222 | PCP044973 | XM_017336792 |
| PCP045007 | 5,614709844 | 5,906890596 | 6,50255338  | 5,807354922 |           |              |
| PCP045012 | 5,961854808 | 6,579994693 | 6,658211483 | 7,029784146 |           |              |
| PCP045037 | 6,894817763 | 6,272956308 | 5,403608584 | 3,807354922 | PCP045037 | XM_009378719 |
| PCP045076 | 6,559644763 | 6,47037417  | 6,677085351 | 5,961854808 |           |              |
| PCP045110 | 6,303780748 | 6,50255338  | 6,777025123 | 7,541716163 | PCP045110 | XR_527167    |
| PCP045124 | 6,397974049 | 6,584962501 | 6,50255338  | 7,199672345 |           |              |
| PCP045125 | 5,624393382 | 5,946496941 | 5,544423562 | 6,497133304 | PCP045125 | XR_001788132 |
| PCP045141 | 7,415065677 | 6,984931073 | 6,95419631  | 6,015024705 | PCP045141 | XM_009345316 |
| PCP045146 | 6,254178286 | 6,03716255  | 6,426264755 | 6,882643049 | PCP045146 | XM_009379537 |
| PCP045171 | 6,969587981 | 6,534030467 | 6,54426899  | 6,672425342 | PCP045171 | XM_018647000 |



*Cluster\_2*

| <b>Gene</b> | <b>H1</b>    | <b>H2</b>    | <b>H3</b>    | <b>H4</b>   |           |              |
|-------------|--------------|--------------|--------------|-------------|-----------|--------------|
| PCP000177   | 0            | -0,577766999 | 1,735522177  | 3,415488271 |           |              |
| PCP000383   | 0,411426246  | 0            | 1,416839742  | 3,415488271 | PCP000383 | XM_017337146 |
| PCP000475   | -0,577766999 | 0            | 0            | 3,874796966 |           |              |
| PCP002039   | 0            | 0            | 1,220329955  | 2,807354922 |           |              |
| PCP002967   | 0            | 0            | 1,735522177  | 2,737686761 |           |              |
| PCP003539   | 0            | 0            | 0            | 4,272769732 | PCP003539 | XM_009378409 |
| PCP004758   | 0            | 0            | 0,411426246  | 4,718635616 | PCP004758 | XM_008354939 |
| PCP005207   | 0            | 0            | 3            | 6,639087423 | PCP005207 | XM_009371003 |
| PCP005765   | 0            | 0            | 1,220329955  | 4,321928095 |           |              |
| PCP006311   | -0,577766999 | 0            | 0,411426246  | 3,502075956 | PCP006311 | XM_009346667 |
| PCP007616   | 0            | 0            | 1            | 3,663344619 | PCP007616 | XM_009363915 |
| PCP007647   | 2,22342255   | 0            | 1            | 2,807354922 | PCP007647 | XM_008357117 |
| PCP009358   | 1,875780063  | 0            | -0,577766999 | 3,169925001 | PCP009358 | XM_009361451 |
| PCP009368   | 0            | 0            | 2,584962501  | 4,754887502 |           |              |
| PCP011192   | 0            | 0,411426246  | -0,577766999 | 2,584962501 | PCP011192 | XM_009353816 |
| PCP011500   | 0            | 1,416839742  | 0            | 4,029452886 | PCP011500 | NM_001302276 |
| PCP011895   | 0            | 0            | 0            | 6,339850003 | PCP011895 | XM_009345085 |
| PCP012324   | 0            | 0            | 0            | 4,087462841 | PCP012324 | XM_009351206 |
| PCP012330   | 0            | -0,577766999 | 3,221877081  | 5,57500972  | PCP012330 | XM_009351202 |
| PCP013122   | 0            | 0            | 3            | 5,554588852 | PCP013122 | XM_009354335 |
| PCP013493   | 0,411426246  | 1,416839742  | 1,735522177  | 4,34553831  | PCP013493 | XR_667379    |
| PCP014159   | -1,59946207  | -0,577766999 | 0,411426246  | 3           | PCP014159 | XM_009341342 |
| PCP014409   | 1,584962501  | 0            | 2,22342255   | 5,789990019 | PCP014409 | XM_009377872 |
| PCP015327   | 0            | 0            | 0            | 6,303780748 |           |              |
| PCP016456   | 0            | 0            | -0,577766999 | 2,737686761 | PCP016456 | XM_009375679 |
| PCP018339   | 0            | 0,411426246  | 2,584962501  | 4,700439718 | PCP018339 | XM_009362609 |
| PCP019525   | 1,220329955  | -0,577766999 | 3,368768349  | 4,73714592  |           |              |
| PCP020766   | -0,577766999 | 1,584962501  | 1,584962501  | 5,235344128 |           |              |
| PCP021608   | 0            | 0            | 0            | 4,222650022 |           |              |
| PCP021703   | 0            | 0            | 2,321928095  | 3,169925001 |           |              |
| PCP021992   | 0,411426246  | 0            | 0            | 4,700439718 | PCP021992 | XM_009376899 |
| PCP022236   | 0            | 0            | 0            | 2,873813198 | PCP022236 | XM_009378442 |
| PCP024590   | -0,577766999 | 0            | 0            | 3,874796966 | PCP024590 | XM_009348778 |
| PCP025035   | 1,416839742  | 1,220329955  | 0,739848103  | 6,254178286 | PCP025035 | XM_009358319 |
| PCP025482   | 0,411426246  | 0            | 1            | 2,939226578 | PCP025482 | XM_008344255 |
| PCP025771   | 0            | 0            | 0,411426246  | 3,27351589  |           |              |
| PCP026132   | 0            | 0            | 0            | 3,321928095 | PCP026132 | XM_008354775 |
| PCP026134   | -0,577766999 | 0            | 1            | 4,544114402 | PCP026134 | XM_008354774 |
| PCP026374   | 0            | 0            | 1,416839742  | 2,737686761 | PCP026374 | XM_009338202 |
| PCP027843   | 0            | -0,577766999 | 0            | 4,392317423 | PCP027843 | XM_009358762 |
| PCP029568   | 0            | 0            | 0            | 4,480911346 | PCP029568 | XM_009362979 |
| PCP029646   | -1,59946207  | 0            | -1,59946207  | 3           | PCP029646 | XM_009361420 |
| PCP030582   | -0,577766999 | 1,875780063  | 0,411426246  | 3,321928095 | PCP030582 | XM_009341740 |

|           |              |             |              |             |           |              |
|-----------|--------------|-------------|--------------|-------------|-----------|--------------|
| PCP031262 | -0,577766999 | 1,584962501 | 1,220329955  | 6,882643049 | PCP031262 | XM_009367965 |
| PCP032052 | 0            | 0,739848103 | 0            | 5,415150205 | PCP032052 | XM_008354940 |
| PCP033855 | 0            | 0           | 0            | 8,936637939 | PCP033855 | XM_021951507 |
| PCP034675 | 0            | 0           | 0            | 3,502075956 | PCP034675 | XM_009366330 |
| PCP035856 | 0            | 0,739848103 | 2            | 3,840966704 | PCP035856 | XM_008384758 |
| PCP036486 | 0            | 0           | 1,220329955  | 5,044394119 | PCP036486 | XM_008368821 |
| PCP040164 | 0,739848103  | 0,411426246 | 2,321928095  | 4,459431619 | PCP040164 | XR_001953975 |
| PCP041332 | 0            | 0           | 2,114367025  | 3,807354922 | PCP041332 | XM_009360390 |
| PCP041515 | 0            | 0           | 0            | 2,939226578 |           |              |
| PCP041918 | -0,577766999 | 0           | 0,739848103  | 5,247927513 | PCP041918 | XM_009337233 |
| PCP041919 | -1,59946207  | 0           | 0,411426246  | 4,985044962 | PCP041919 | XM_009337233 |
| PCP041951 | 0            | 0,411426246 | 0            | 3,840966704 |           |              |
| PCP042384 | 0,739848103  | 0           | 1            | 3,459431619 | PCP042384 | XR_667961    |
| PCP043886 | 0            | 1,735522177 | 0            | 2,939226578 |           |              |
| PCP044182 | 2,6622055    | 0,411426246 | 0            | 2,939226578 | PCP044182 | XM_009377643 |
| PCP044298 | 0            | 0,411426246 | -0,577766999 | 4,437627248 | PCP044298 | XM_009352526 |
| PCP044465 | 0            | 0           | 0,739848103  | 5,073391816 |           |              |
| PCP045074 | 0            | 0           | 2,807354922  | 5,222263604 | PCP045074 | XM_009361465 |
| PCP045095 | 3,459431619  | 0           | 0,411426246  | 3,27351589  |           |              |

*Cluster\_3*

| <b>Gene</b> | <b>H1</b>    | <b>H2</b>   | <b>H3</b>   | <b>H4</b>   |             |                        |
|-------------|--------------|-------------|-------------|-------------|-------------|------------------------|
| PCP000537   | -0,577766999 | 3,700439718 |             | 0           | 2,321928095 | PCP000537 XM_009360580 |
| PCP001192   | 0,411426246  | 1,584962501 | 2,22342255  | 3,624100895 | PCP001192   | XM_018648295           |
| PCP001276   | 0            | 2,807354922 |             | 1           | 2,807354922 |                        |
| PCP002412   | 0            | 2,939226578 | 2,939226578 | 2,114367025 | PCP002412   | XM_009349437           |
| PCP003039   | 0            | 2,114367025 |             | 1           | 2,939226578 | PCP003039 XM_008391616 |
| PCP003569   | -0,577766999 | 1,584962501 | 2,584962501 | 3,459431619 | PCP003569   | XM_018642824           |
| PCP006802   | 0,739848103  | 1,584962501 | 2,414135533 | 5,183089461 | PCP006802   | XM_008368837           |
| PCP007786   | -0,577766999 | 2,737686761 | 2,321928095 | 4,029452886 | PCP007786   | XM_017337427           |
| PCP008995   | 1,416839742  | 2,503348735 | 1,735522177 | 4,604664415 | PCP008995   | XM_009361153           |
| PCP009575   | 1            | 2,737686761 | 2,321928095 | 3,874796966 |             |                        |
| PCP009764   | 0,411426246  | 2,737686761 | 1,875780063 | 5,700439718 | PCP009764   | XM_009359115           |
| PCP010883   | 1,416839742  | 2,503348735 | 2,321928095 | 4           | PCP010883   | XM_009358577           |
| PCP013542   | 0            | 3,544732656 | 2,737686761 | 4,790250739 |             |                        |
| PCP014077   | 0            | 2,114367025 | 3,27351589  | 3,624100895 | PCP014077   | XM_009360493           |
| PCP014684   | 0            | 2,584962501 | 2,807354922 | 2,873813198 | PCP014684   | XM_009353638           |
| PCP015138   | 0,739848103  | 5,380937195 | 1,735522177 | 2,807354922 | PCP015138   | XM_009379473           |
| PCP018320   | 0            | 2,807354922 | 0,739848103 | 2           |             |                        |
| PCP018954   | 1,416839742  | 2,873813198 | 0,739848103 | 4,196134881 | PCP018954   | XM_018645229           |
| PCP019091   | 0            | 3,116031993 | 1,416839742 | 1,584962501 |             |                        |
| PCP019828   | 1            | 1,735522177 | 2,22342255  | 4,544114402 | PCP019828   | XM_009335623           |
| PCP020117   | -0,577766999 | 2,503348735 | 3,906890596 | 4,169925001 | PCP020117   | XM_018651228           |
| PCP022491   | -0,577766999 | 2,414135533 | 3,368768349 | 3,415488271 | PCP022491   | XM_008343921           |
| PCP022563   | 2,321928095  | 2,807354922 | 1,220329955 | 4,369466484 | PCP022563   | XM_009336969           |
| PCP022619   | 0            | 1,735522177 | 2,114367025 | 4,029452886 |             |                        |
| PCP022688   | 0            | 3,736604875 |             | 0           | 3,368768349 | PCP022688 XM_009379762 |
| PCP023955   | -0,577766999 | 3           | 2,414135533 | 3,584962501 |             |                        |
| PCP025021   | 0            | 2,873813198 |             | 0           | 1,875780063 | PCP025021 XM_017332207 |
| PCP025421   | 3,221877081  | 2,584962501 |             | 0           | 3,321928095 |                        |
| PCP026196   | -0,577766999 | 5,380937195 | 1,584962501 | 4,414812061 | PCP026196   | XM_018649523           |
| PCP026816   | -0,577766999 | 5,285402219 | 1,584962501 | 2,503348735 | PCP026816   | XM_009350298           |
| PCP027529   | 0            | 2,114367025 | 1,220329955 | 2,807354922 | PCP027529   | XM_009345414           |
| PCP028063   | -0,577766999 | 3,772941338 |             | 2           | 2,414135533 |                        |
| PCP028452   | 0,411426246  | 1,584962501 |             | 2           | 4,604664415 | PCP028452 XM_008378043 |
| PCP030682   | 3,058316496  | 3,116031993 |             | 0           | 4,143230135 | PCP030682 NM_001293841 |
| PCP031248   | 0            | 2,22342255  | 2,321928095 | 3,584962501 | PCP031248   | XM_009364231           |
| PCP031664   | 0            | 2,6622055   | 3,663344619 | 3,415488271 |             |                        |
| PCP034348   | 0            | 4,087462841 | 2,414135533 | 4,502712486 |             |                        |
| PCP035013   | 1,220329955  | 4,297925053 | 1,220329955 | 3,221877081 | PCP035013   | XM_009365849           |
| PCP035060   | -0,577766999 | 2,807354922 | 3,584962501 | 2,584962501 | PCP035060   | XM_009369774           |
| PCP035233   | 1,735522177  | 3,736604875 |             | 0           | 3,221877081 | PCP035233 XM_009346770 |
| PCP037970   | 0            | 2,414135533 | 2,414135533 | 2,873813198 |             |                        |
| PCP039257   | 2,114367025  | 2,873813198 | 0,739848103 | 4,718635616 |             |                        |
| PCP040058   | 0,739848103  | 2,114367025 | 3,116031993 | 4,143230135 |             |                        |

|           |             |             |              |            |           |              |
|-----------|-------------|-------------|--------------|------------|-----------|--------------|
| PCP043452 | 0           | 3,969933275 | -0,577766999 | 2,22342255 | PCP043452 | XM_008357808 |
| PCP044681 | 1,735522177 | 2,807354922 | 0            | 2,6622055  |           |              |

Cluster 4

| Gene      | H1           | H2           | H3          | H4          |           |              |
|-----------|--------------|--------------|-------------|-------------|-----------|--------------|
| PCP002652 | 0            | 0,411426246  | 2,6622055   | 2,584962501 | PCP002652 | XM_009349728 |
| PCP003681 | 1            | 0,411426246  | 2,6622055   | 3,938285792 | PCP003681 | XM_009347210 |
| PCP003756 | 0,739848103  | 1,584962501  | 2,939226578 | 3,840966704 | PCP003756 | XM_008376175 |
| PCP005668 | 0            | 1,220329955  | 3,368768349 | 4,115199749 | PCP005668 | XM_017330330 |
| PCP005923 | 1,735522177  | 1,416839742  | 4,169925001 | 2,6622055   | PCP005923 | XM_008360216 |
| PCP007726 | 0            | 0,739848103  | 2,873813198 | 2,737686761 | PCP007726 | XM_018652391 |
| PCP011324 | 1,875780063  | 1,416839742  | 4,272769732 | 2,503348735 | PCP011324 | XM_009370600 |
| PCP011327 | -0,577766999 | 0,739848103  | 3,938285792 | 2,807354922 | PCP011327 | XM_009370595 |
| PCP011336 | 2,114367025  | 0,739848103  | 2,6622055   | 4,272769732 | PCP011336 | XM_009370577 |
| PCP012231 | 0            | 1,220329955  | 2,6622055   | 3,058316496 |           |              |
| PCP015025 | 0            | 1            | 3,502075956 | 2           |           |              |
| PCP015054 | 1,875780063  | 1            | 3,415488271 | 4,247927513 | PCP015054 | XM_009363864 |
| PCP017991 | 2,114367025  | 0            | 2,737686761 | 3,27351589  | PCP017991 | XM_009372934 |
| PCP020197 | 3,321928095  | 0            | 2,414135533 | 2,22342255  |           |              |
| PCP020222 | 1,735522177  | 0            | 3,584962501 | 3,544732656 | PCP020222 | XM_009350919 |
| PCP023488 | 0,411426246  | 0            | 4,414812061 | 0           | PCP023488 | XM_009368310 |
| PCP023657 | 0            | 0            | 3,116031993 | 1,875780063 | PCP023657 | XM_009347177 |
| PCP024232 | 0,411426246  | -0,577766999 | 3,415488271 | 3,459431619 | PCP024232 | XM_008391522 |
| PCP024472 | 1            | 0            | 3,736604875 | 1           | PCP024472 | XM_009346054 |
| PCP026551 | 0            | 0,739848103  | 3,221877081 | 2           | PCP026551 | XM_009368030 |
| PCP027668 | 2,414135533  | 0,739848103  | 3,840966704 | 1,735522177 | PCP027668 | XM_009367399 |
| PCP028412 | 1,416839742  | 1            | 3,906890596 | 2,939226578 | PCP028412 | XM_009349100 |
| PCP029683 | 0,411426246  | 0            | 5,014801602 | 4,73714592  | PCP029683 | XM_008383683 |
| PCP030402 | 2,114367025  | 0,411426246  | 3,169925001 | 3,874796966 | PCP030402 | XM_008381038 |
| PCP030684 | 0            | 2,114367025  | 3           | 1,584962501 | PCP030684 | NM_001294352 |
| PCP031312 | 0            | 0            | 4,169925001 | 5,014801602 | PCP031312 | XM_009339250 |
| PCP034856 | 0            | 0,411426246  | 3,807354922 | 4,029452886 | PCP034856 | XM_018645673 |
| PCP035254 | -0,577766999 | 1,735522177  | 3,584962501 | 1,584962501 | PCP035254 | XM_009346397 |
| PCP037666 | 3,116031993  | 0            | 3,874796966 | 2           |           |              |
| PCP038193 | 0            | 0            | 2,737686761 | 0           |           |              |
| PCP038399 | 1,875780063  | 0            | 3,058316496 | 1,735522177 |           |              |
| PCP040142 | 1,220329955  | 1,735522177  | 4,143230135 | 3,169925001 | PCP040142 | XM_018650159 |
| PCP042238 | 0            | 0            | 10,03250037 | 0           |           |              |
| PCP042994 | 3,116031993  | 0            | 2,6622055   | 3,221877081 |           |              |
| PCP045114 | 0            | 1,735522177  | 3,116031993 | 2,584962501 | PCP045114 | XM_009340090 |

*Cluster 5*

| <b>Gene</b> | <b>H1</b>   | <b>H2</b>   | <b>H3</b>   | <b>H4</b>   |           |              |
|-------------|-------------|-------------|-------------|-------------|-----------|--------------|
| PCP000012   | 8,934663924 | 8,915879379 | 9,103287808 | 9,646252679 | PCP000012 | XM_008369041 |
| PCP000031   | 8,839203788 | 8,949330653 | 8,991521846 | 9,388727692 |           |              |
| PCP000068   | 10,95613654 | 10,85200664 | 10,96914905 | 10,8930512  | PCP000068 | XM_018651796 |
| PCP000073   | 14,62319564 | 14,80041107 | 14,85021956 | 15,27740837 | PCP000073 | XM_009358716 |
| PCP000074   | 11,58135596 | 11,43028005 | 11,18920683 | 11,44035012 | PCP000074 | XM_009358717 |
| PCP000080   | 9,515049296 | 9,146365017 | 9,652844973 | 9,849139214 | PCP000080 | XM_008375279 |
| PCP000085   | 10,63873456 | 10,40442845 | 10,67213359 | 10,96938652 | PCP000085 | XM_018651224 |
| PCP000090   | 9,740337332 | 9,82707272  | 9,801433534 | 9,750991645 | PCP000090 | XM_009375223 |
| PCP000091   | 9,852264198 | 9,734150722 | 9,758223215 | 9,806275718 |           |              |
| PCP000094   | 8,648645193 | 8,970594857 | 9,273026268 | 9,614102459 | PCP000094 | XM_009375211 |
| PCP000100   | 8,9905862   | 9,046223651 | 9,2589664   | 9,523561956 |           |              |
| PCP000129   | 11,66222331 | 11,23342195 | 11,52028964 | 11,28424575 |           |              |
| PCP000158   | 8,893817229 | 9,166589927 | 9,299963518 | 9,253445696 | PCP000158 | XM_009377990 |
| PCP000164   | 9,169098221 | 9,095397023 | 9,345782228 | 9,585582276 | PCP000164 | XM_008349845 |
| PCP000165   | 10,51897765 | 10,45771945 | 10,47065887 | 11,00469099 | PCP000165 | XM_008381121 |
| PCP000189   | 8,984902599 | 9,072347016 | 9,120678526 | 9,566054038 | PCP000189 | XM_018643790 |
| PCP000200   | 10,20252792 | 10          | 9,991054099 | 10,32192809 | PCP000200 | XM_008372600 |
| PCP000207   | 9,063395081 | 8,967716202 | 9,005624549 | 9,337621902 | PCP000207 | XM_008365829 |
| PCP000217   | 9,726218159 | 9,611024797 | 9,668884984 | 9,591204414 | PCP000217 | XM_009339700 |
| PCP000218   | 9,49251418  | 9,68707819  | 10,15396996 | 10,17201489 | PCP000218 | XM_009339697 |
| PCP000241   | 11,2644426  | 11,43688328 | 11,69087101 | 12,08978149 | PCP000241 | XM_009339665 |
| PCP000256   | 9,122388003 | 9,125852541 | 9,28000515  | 9,840258649 |           |              |
| PCP000258   | 9,164077264 | 9,014941046 | 9,296916207 | 9,077696975 | PCP000258 | XM_008380915 |
| PCP000280   | 9,88519302  | 9,781359714 | 9,688827272 | 10,06474276 | PCP000280 | XM_009342576 |
| PCP000295   | 9,731879027 | 9,543669869 | 9,790625442 | 9,986794882 | PCP000295 | XR_001788324 |
| PCP000299   | 9,323437626 | 9,559051993 | 9,507140523 | 9,275356315 | PCP000299 | XM_008367147 |
| PCP000300   | 10,40691714 | 10,92208632 | 11,04666703 | 11,33278065 | PCP000300 | XM_008380971 |
| PCP000311   | 10,43775207 | 10,52061868 | 10,70102049 | 11,029515   | PCP000311 | XM_009357352 |
| PCP000320   | 10,19229281 | 9,988216019 | 10,08569817 | 10,13484983 |           |              |
| PCP000330   | 9,809494835 | 9,727920455 | 9,971069283 | 10,16908569 | PCP000330 | XM_008379508 |
| PCP000331   | 14,10451685 | 13,78391905 | 13,56625268 | 13,25571758 | PCP000331 | XM_009357380 |
| PCP000357   | 10,29729461 | 10,39553414 | 10,54624819 | 10,78408678 | PCP000357 | XM_009371792 |
| PCP000363   | 11,7926561  | 11,63903767 | 11,73442596 | 11,71094846 |           |              |
| PCP000381   | 9,408690635 | 9,453949632 | 9,588096205 | 9,506466274 | PCP000381 | XM_008341858 |
| PCP000390   | 9,095397023 | 9,235224441 | 9,28771238  | 9,674774879 | PCP000390 | XM_008362488 |
| PCP000394   | 8,76927586  | 8,938609256 | 9,037080165 | 8,918863237 | PCP000394 | XM_017323742 |
| PCP000395   | 10,67771964 | 10,92530964 | 10,91787179 | 11,203348   | PCP000395 | XM_008341829 |
| PCP000399   | 11,3824457  | 11,26346288 | 11,31948585 | 11,59479112 |           |              |
| PCP000401   | 11,62555817 | 11,63964369 | 11,70663847 | 11,68357804 |           |              |
| PCP000432   | 8,797661526 | 8,689997971 | 8,887738491 | 9,145499145 |           |              |
| PCP000433   | 9,004698008 | 9,022367813 | 9,082149041 | 9,45532722  | PCP000433 | XM_009371230 |
| PCP000456   | 8,911901261 | 8,775873612 | 8,946409212 | 8,721099189 | PCP000456 | XM_008355035 |
| PCP000457   | 10,84470576 | 11,04165915 | 10,63873456 | 10,81991561 | PCP000457 | NM_001301125 |

|           |             |             |             |             |           |              |
|-----------|-------------|-------------|-------------|-------------|-----------|--------------|
| PCP000464 | 8,85277917  | 9,131008067 | 9,433940073 | 9,988684687 | PCP000464 | XM_009353736 |
| PCP000465 | 9,328674927 | 9,596804728 | 9,862637358 | 10,73244729 |           |              |
| PCP000469 | 9,28000515  | 9,439477697 | 9,532687093 | 9,786808699 | PCP000469 | XM_009351676 |
| PCP000472 | 9,714245518 | 9,423473125 | 9,860574891 | 10,08391805 | PCP000472 | XM_009361882 |
| PCP000476 | 8,784634846 | 8,860062694 | 8,857980995 | 8,842350343 |           |              |
| PCP000497 | 10,12412131 | 10,26912668 | 10,16741815 | 10,28424575 |           |              |
| PCP000501 | 9,724513853 | 9,736401931 | 9,718241739 | 9,640841416 | PCP000501 | XM_008369305 |
| PCP000504 | 9,736401931 | 9,836050355 | 9,959523851 | 10,44224893 |           |              |
| PCP000508 | 10,01634867 | 9,434628228 | 9,387306529 | 9,433940073 |           |              |
| PCP000521 | 9,916372141 | 10,00748986 | 10,03021191 | 10,56478779 |           |              |
| PCP000522 | 9,82707272  | 9,862637358 | 9,843921051 | 10,29883012 |           |              |
| PCP000528 | 10,14932797 | 10,5685927  | 10,74483384 | 10,70908381 | PCP000528 | XM_009360561 |
| PCP000562 | 10,66681871 | 10,75043065 | 10,87651695 | 10,74034577 | PCP000562 | XM_009373156 |
| PCP000563 | 9,393025715 | 9,174101763 | 9,152284842 | 9,169098221 | PCP000563 | XM_009373154 |
| PCP000574 | 8,953236133 | 9,177419538 | 9,123267853 | 9,636624621 | PCP000574 | XM_008348731 |
| PCP000583 | 9,406566431 | 9,452591317 | 9,538518764 | 9,813781191 | PCP000583 | XM_009352013 |
| PCP000589 | 9,429762402 | 9,225617167 | 9,537218401 | 9,438791853 | PCP000589 | XR_668982    |
| PCP000600 | 10,02375435 | 10,14551188 | 10,10895563 | 10,16783208 |           |              |
| PCP000605 | 9,52160044  | 9,299963518 | 9,342808055 | 9,626931876 | PCP000605 | XM_008345725 |
| PCP000614 | 11,19557522 | 11,44983474 | 11,63994208 | 11,63359922 | PCP000614 | XM_008387554 |
| PCP000624 | 8,922822231 | 8,984902599 | 9,083027168 | 9,574271841 |           |              |
| PCP000631 | 9,380828997 | 9,458057945 | 9,64385619  | 10,00656452 |           |              |
| PCP000643 | 9,792790294 | 9,646252679 | 10,0018726  | 10,07056375 | PCP000643 | XM_009374201 |
| PCP000668 | 11,65015421 | 11,44432645 | 11,05934446 | 10,29653771 | PCP000668 | XM_009359625 |
| PCP000670 | 11,23002044 | 10,83736775 | 11,04598485 | 10,97561156 | PCP000670 | XR_667423    |
| PCP000676 | 9,573647187 | 9,510427928 | 9,729620744 | 10,18156227 |           |              |
| PCP000693 | 9,019590728 | 8,939579214 | 9,056177063 | 8,976334992 | PCP000693 | XM_018652432 |
| PCP000709 | 9,415044544 | 9,362667132 | 9,320416982 | 9,646252679 |           |              |
| PCP000724 | 9,266786541 | 9,275356315 | 9,358277568 | 10,32117274 |           |              |
| PCP000735 | 11,89772069 | 11,95830983 | 12,31665771 | 13,12487575 | PCP000735 | XM_008376055 |
| PCP000737 | 11,66118576 | 11,49984589 | 11,60994976 | 11,47082662 | PCP000737 | XM_009370526 |
| PCP000739 | 8,614709844 | 8,694636474 | 8,883651361 | 9,216745858 | PCP000739 | XM_018643516 |
| PCP000762 | 8,875503635 | 9,023283079 | 8,960001932 | 9,441554026 |           |              |
| PCP000765 | 11,11069862 | 10,97513146 | 10,97799537 | 10,90889545 | PCP000765 | XM_008392669 |
| PCP000777 | 9,742595757 | 10,07012094 | 10,20579325 | 11,08679969 | PCP000777 | XM_008367071 |
| PCP000798 | 9,949345246 | 9,952260754 | 9,836050355 | 9,884170519 |           |              |
| PCP000825 | 9,255807556 | 9,401583539 | 9,361943774 | 9,69406183  | PCP000825 | XM_008349140 |
| PCP000826 | 9,634212071 | 9,904890476 | 10,41961263 | 11,56160777 | PCP000826 | XM_008378979 |
| PCP000839 | 10,22560512 | 10,2467406  | 10,31212284 | 10,23920469 | PCP000839 | XM_008395642 |
| PCP000852 | 9,33911511  | 9,162391329 | 10,32942637 | 11,00819749 | PCP000852 | XM_009351836 |
| PCP000858 | 10,11504365 | 9,257387843 | 9,600526229 | 9,874474241 | PCP000858 | XM_009370938 |
| PCP000865 | 10,46318716 | 10,36850646 | 10,22962397 | 9,788441022 | PCP000865 | XM_009370949 |
| PCP000876 | 10,99175566 | 11,29347165 | 10,9427564  | 10,77423524 |           |              |
| PCP000891 | 10,81618368 | 10,54496443 | 10,95201316 | 11,33222121 | PCP000891 | XM_009377296 |
| PCP000897 | 10,93737382 | 10,76983784 | 10,63390341 | 10,78244952 | PCP000897 | XM_009377225 |
| PCP000898 | 8,938609256 | 8,908902953 | 9,013099307 | 9,469641817 | PCP000898 | XM_008353496 |

|           |             |             |             |             |           |              |
|-----------|-------------|-------------|-------------|-------------|-----------|--------------|
| PCP000909 | 10,72678865 | 10,79143154 | 10,90312868 | 11,11157259 |           |              |
| PCP000941 | 9,915386449 | 9,564778269 | 9,752096261 | 10,14974712 | PCP000941 | XM_008351495 |
| PCP000965 | 11,65344075 | 11,32230563 | 11,44570291 | 11,97441459 | PCP000965 | XM_009363475 |
| PCP000983 | 9,840258649 | 9,792253453 | 9,711374448 | 9,824433739 |           |              |
| PCP000985 | 9,77807713  | 9,899356923 | 9,193944186 | 8,942514505 | PCP000985 | XM_008383768 |
| PCP001008 | 12,3836152  | 11,64084593 | 11,80829253 | 12,01564851 |           |              |
| PCP001032 | 9,071462363 | 9,274564521 | 9,240791332 | 9,646252679 | PCP001032 | XM_017325543 |
| PCP001035 | 10,12066557 | 10,07771032 | 10,15692998 | 9,866243459 | PCP001035 | XM_009359620 |
| PCP001039 | 9,272233193 | 9,818582177 | 10,02329694 | 10,46658634 | PCP001039 | XM_009345447 |
| PCP001047 | 8,891783703 | 8,890781061 | 9,010304306 | 8,54689446  | PCP001047 | XM_008394323 |
| PCP001097 | 10,28038801 | 10,46079375 | 10,55298603 | 10,67360059 | PCP001097 | XM_009352961 |
| PCP001098 | 9,296159109 | 9,691743519 | 10,01029032 | 10,43948809 | PCP001098 | XM_008380259 |
| PCP001110 | 8,883651361 | 8,713111526 | 8,80196697  | 9,345782228 | PCP001110 | XM_018644259 |
| PCP001114 | 9,155653112 | 9,05709822  | 9,207819661 | 9,570481906 | PCP001114 | XM_009336912 |
| PCP001119 | 11,241584   | 11,22359752 | 11,18281022 | 10,41397693 | PCP001119 | XM_009381040 |
| PCP001129 | 10,66415392 | 11,13164478 | 11,18693752 | 11,00328599 | PCP001129 | XM_009348332 |
| PCP001130 | 8,87857209  | 8,862110391 | 9,145499145 | 9,535916864 | PCP001130 | XM_009348333 |
| PCP001150 | 9,353874607 | 9,229611955 | 9,167418146 | 9,118084543 |           |              |
| PCP001169 | 10,00281502 | 9,936152052 | 9,941531848 | 9,924322617 | PCP001169 | XM_009345160 |
| PCP001194 | 12,01970539 | 11,93725243 | 11,93135434 | 11,39998815 |           |              |
| PCP001204 | 8,988684687 | 9,568583198 | 9,400879436 | 9,350939182 | PCP001204 | XM_008347810 |
| PCP001220 | 10,80467153 | 10,65553072 | 10,79928162 | 11,07258149 | PCP001220 | XM_009366886 |
| PCP001223 | 8,776992236 | 8,723387907 | 8,952246191 | 9,211888295 |           |              |
| PCP001226 | 9,327170869 | 9,112882543 | 9,334653186 | 9,288473922 | PCP001226 | XM_009366877 |
| PCP001232 | 10,35718909 | 10,24475627 | 10,26561505 | 10,20171962 | PCP001232 | XM_008349189 |
| PCP001238 | 12,77197015 | 11,82959194 | 12,15671514 | 12,22691488 |           |              |
| PCP001264 | 11,46624474 | 11,06877828 | 11,20742315 | 11,49685378 | PCP001264 | XM_018652431 |
| PCP001283 | 9,46760555  | 9,581821975 | 9,648051932 | 10,2199792  | PCP001283 | XM_009361921 |
| PCP001286 | 9,458755197 | 9,377926277 | 9,607940556 | 9,915386449 |           |              |
| PCP001294 | 11,03800673 | 10,9653009  | 11,04006364 | 11,35112144 |           |              |
| PCP001298 | 8,478446064 | 8,866258916 | 8,894817763 | 9,189009107 |           |              |
| PCP001308 | 8,541754876 | 8,924812504 | 9,562872035 | 10,26951244 |           |              |
| PCP001317 | 11,65194861 | 11,44121683 | 11,7641791  | 12,00842862 | PCP001317 | XM_009370295 |
| PCP001326 | 9,2644426   | 9,845490051 | 9,990103964 | 9,959031118 |           |              |
| PCP001335 | 10,72763971 | 10,72820114 | 10,71967117 | 10,66917739 | PCP001335 | XM_009362989 |
| PCP001339 | 9,581200582 | 9,517019734 | 9,657014692 | 9,962896005 | PCP001339 | XM_017324176 |
| PCP001345 | 8,913876736 | 9,017727086 | 8,862110391 | 8,892785649 | PCP001345 | XM_008376091 |
| PCP001368 | 9,762664404 | 9,754336368 | 9,633594681 | 9,779177627 | PCP001368 | XM_017336506 |
| PCP001385 | 9,13442632  | 9,41715631  | 9,544326957 | 9,251884747 | PCP001385 | XM_009348684 |
| PCP001467 | 9,758223215 | 9,648663167 | 9,616548844 | 9,532024681 | PCP001467 | XM_009340916 |
| PCP001503 | 11,09824926 | 11,20273604 | 11,37395266 | 12,39419471 | PCP001503 | XM_009358640 |
| PCP001684 | 9,112882543 | 9,164077264 | 9,559702114 | 9,706789535 |           |              |
| PCP001686 | 10,84418005 | 11,18177344 | 11,18920683 | 11,26912668 | PCP001686 | XM_009350898 |
| PCP001691 | 12,75641663 | 12,5525082  | 12,15228484 | 12,1424262  | PCP001691 | XM_009350840 |
| PCP001700 | 10,16616308 | 9,897845456 | 10,41045135 | 9,767638247 | PCP001700 | XM_009350755 |
| PCP001721 | 9,796575043 | 9,668884984 | 9,899356923 | 10,2911707  |           |              |

|           |             |             |             |             |           |              |
|-----------|-------------|-------------|-------------|-------------|-----------|--------------|
| PCP001731 | 8,705044823 | 8,705044823 | 8,988684687 | 9,169925001 |           |              |
| PCP001754 | 9,571126898 | 9,330177419 | 9,742023058 | 9,302250498 |           |              |
| PCP001757 | 11,48112837 | 11,46284476 | 11,5996014  | 11,34059008 | PCP001757 | XM_009358251 |
| PCP001783 | 9,314401976 | 9,469641817 | 9,419264989 | 9,891282469 | PCP001783 | XM_009358191 |
| PCP001794 | 9,609788199 | 9,726780139 | 9,813781191 | 10,30378075 |           |              |
| PCP001801 | 9,535916864 | 9,589969422 | 9,74819285  | 9,626931876 | PCP001801 | XM_018647479 |
| PCP001804 | 10,11591499 | 10,04484489 | 10,12196082 | 10,05301628 | PCP001804 | XM_018647477 |
| PCP001833 | 9,312882955 | 9,312882955 | 9,419960178 | 9,824958741 |           |              |
| PCP001840 | 11,00211178 | 11,20130917 | 11,378116   | 11,36540931 | PCP001840 | XM_009357761 |
| PCP001841 | 9,358277568 | 9,185693134 | 9,810041371 | 9,206208529 |           |              |
| PCP001843 | 9,119797095 | 9,090985714 | 9,142949447 | 8,966736149 |           |              |
| PCP001844 | 10,7428736  | 10,54271269 | 10,79116289 | 10,60084211 | PCP001844 | XM_009357656 |
| PCP001857 | 10,26717293 | 10,41855893 | 10,29920802 | 10,74455637 | PCP001857 | XM_009345357 |
| PCP001863 | 9,318926875 | 9,142107057 | 8,970594857 | 9,401583539 | PCP001863 | XM_018649986 |
| PCP001903 | 10,22921538 | 10,31628153 | 10,3829806  | 10,66917739 | PCP001903 | XM_018645108 |
| PCP001938 | 10,56192752 | 10,58183139 | 10,65612986 | 10,23801057 |           |              |
| PCP001943 | 9,973453429 | 9,842868866 | 10,02236781 | 10,34170783 | PCP001943 | XM_009372138 |
| PCP001958 | 10,97704375 | 10,82283369 | 10,89506779 | 10,65105169 |           |              |
| PCP001961 | 11,04143329 | 10,97680038 | 10,95177282 | 10,91163916 |           |              |
| PCP001964 | 8,684152487 | 9,041659152 | 8,876516947 | 8,788979283 | PCP001964 | XM_009372174 |
| PCP001992 | 9,318926875 | 9,272233193 | 9,385862401 | 9,794951903 |           |              |
| PCP002024 | 10,18156227 | 10,05799172 | 10,10852446 | 10,13528603 | PCP002024 | XM_018648019 |
| PCP002028 | 8,731319031 | 8,861086906 | 8,977279923 | 9,195569065 | PCP002028 | XM_009360660 |
| PCP002037 | 10,70879938 | 10,47876962 | 10,64685568 | 10,94227257 |           |              |
| PCP002041 | 10,28386391 | 10,28038801 | 10,54592977 | 10,90538701 | PCP002041 | XM_009349034 |
| PCP002045 | 9,218369492 | 9,468970167 | 9,442943496 | 9,650459419 |           |              |
| PCP002046 | 9,371406396 | 9,117201525 | 9,236014192 | 9,142107057 | PCP002046 | XM_008379446 |
| PCP002057 | 11,01889562 | 11,58104519 | 11,82323586 | 12,21401549 | PCP002057 | XM_008380466 |
| PCP002062 | 9,336127147 | 9,557789157 | 9,47100451  | 9,444331629 | PCP002062 | NM_001319253 |
| PCP002094 | 10,63147721 | 10,69494112 | 10,56921954 | 10,18818083 | PCP002094 | XM_009364164 |
| PCP002114 | 9,598666678 | 9,441554026 | 9,964340868 | 10,79224532 | PCP002114 | XM_018652341 |
| PCP002124 | 10,10197567 | 10,22480965 | 10,37359384 | 10,48750846 | PCP002124 | XM_008357034 |
| PCP002127 | 11,46658634 | 11,2805794  | 11,3376219  | 11,10219226 |           |              |
| PCP002128 | 9,349458168 | 9,315149562 | 9,173252384 | 9,019590728 | PCP002128 | XM_008375402 |
| PCP002131 | 10,28617653 | 10,18982456 | 10,17533747 | 9,934177372 |           |              |
| PCP002132 | 8,873444113 | 8,615923847 | 8,832890014 | 9,315896762 | PCP002132 | XM_009371405 |
| PCP002143 | 9,332417038 | 9,345782228 | 9,438791853 | 9,813252106 | PCP002143 | XM_008376178 |
| PCP002164 | 10,61654884 | 10,52877641 | 9,960479854 | 10,82601612 | PCP002164 | XM_017327118 |
| PCP002219 | 9,524208672 | 9,796039609 | 10,00842862 | 10,2644426  | PCP002219 | XM_008378559 |
| PCP002232 | 12,14932479 | 11,54737656 | 11,82602009 | 11,48196589 | PCP002232 | XM_009343010 |
| PCP002234 | 13,94727165 | 13,71224002 | 13,88877464 | 14,23097136 | PCP002234 | XM_009343007 |
| PCP002236 | 8,46760555  | 8,576181982 | 9,262094845 | 9,956129273 | PCP002236 | XM_009359572 |
| PCP002252 | 9,485165154 | 9,267559206 | 9,483150695 | 9,933203774 | PCP002252 | XM_009376117 |
| PCP002254 | 9,944463173 | 9,364134655 | 9,599912842 | 9,996713565 | PCP002254 | XM_009376113 |
| PCP002261 | 8,74708524  | 8,74929961  | 8,85277917  | 9,33315535  |           |              |
| PCP002272 | 10,14168568 | 10,65284497 | 10,30947635 | 11,15080716 |           |              |



|           |             |             |             |             |           |              |
|-----------|-------------|-------------|-------------|-------------|-----------|--------------|
| PCP002278 | 10,81191249 | 10,21674586 | 10,64175373 | 10,99152185 | PCP002278 | XM_009353149 |
| PCP002288 | 10,28270621 | 10,06564501 | 10,12799432 | 10,17990909 | PCP002288 | XM_018646379 |
| PCP002289 | 9,477758266 | 9,499845887 | 9,868313278 | 9,920352855 |           |              |
| PCP002292 | 9,541096615 | 9,605479518 | 9,548821908 | 9,483815777 | PCP002292 | XM_017322807 |
| PCP002293 | 11,55682694 | 11,90312868 | 11,30701292 | 11,28327939 | PCP002293 | XM_009357557 |
| PCP002297 | 10,07992473 | 9,896831887 | 10,1980398  | 10,4101015  | PCP002297 | XM_018647371 |
| PCP002298 | 9,017727086 | 9,392317423 | 9,803049401 | 10,0018726  | PCP002298 | XM_009357564 |
| PCP002299 | 10,5300844  | 10,72649918 | 10,65075559 | 10,67977037 | PCP002299 | XM_009357622 |
| PCP002300 | 9,079484784 | 9,299963518 | 9,189009107 | 9,28077077  | PCP002300 | XM_018647377 |
| PCP002301 | 9,356077767 | 9,223205318 | 9,254249162 | 9,242388143 |           |              |
| PCP002317 | 9,193106413 | 9,194756854 | 9,331655958 | 9,878050913 | PCP002317 | XM_009356415 |
| PCP002336 | 10,01541505 | 9,837107523 | 10,03937147 | 10,22520744 |           |              |
| PCP002337 | 10,38909352 | 10,17367714 | 10,18941689 | 10,33352436 | PCP002337 | XM_009380960 |
| PCP002348 | 9,80843332  | 9,907897125 | 9,990572019 | 10,34725594 | PCP002348 | XM_009365943 |
| PCP002380 | 10,01587497 | 10,11243951 | 10,03617361 | 10,44224893 |           |              |
| PCP002399 | 9,950803736 | 9,886199551 | 10,0768156  | 10,6747837  |           |              |
| PCP002422 | 9,047123912 | 9,114601277 | 9,144658243 | 9,478425839 | PCP002422 | XM_009361495 |
| PCP002431 | 8,75043902  | 8,664162806 | 8,869347076 | 9,131008067 |           |              |
| PCP002434 | 9,796575043 | 9,937623934 | 10,03112222 | 9,975375111 | PCP002434 | XM_009375274 |
| PCP002435 | 8,640244936 | 8,856954575 | 9,124121312 | 9,293862446 | PCP002435 | XM_009375273 |
| PCP002436 | 11,00492268 | 11,18920683 | 11,28847969 | 11,65672428 | PCP002436 | XM_008382252 |
| PCP002442 | 9,064284694 | 9,031577154 | 8,963849777 | 9,001886668 | PCP002442 | XM_018647522 |
| PCP002444 | 9,449829585 | 9,260519709 | 9,273026268 | 9,238404739 | PCP002444 | XM_018643976 |
| PCP002470 | 10,19352536 | 10,17741954 | 10,3376219  | 10,57016879 | PCP002470 | XR_001786033 |
| PCP002523 | 9,290018847 | 9,403012024 | 9,557138173 | 9,929258409 |           |              |
| PCP002525 | 9,273795599 | 9,169098221 | 9,119797095 | 9,050746552 | PCP002525 | XM_017332537 |
| PCP002550 | 8,74708524  | 8,864186145 | 8,949330653 | 9,37286506  |           |              |
| PCP002559 | 9,381542951 | 9,45532722  | 9,667111542 | 9,956622999 | PCP002559 | XM_009363619 |
| PCP002576 | 12,1176431  | 12,71152287 | 13,10618177 | 14,10876946 | PCP002576 | XM_017336284 |
| PCP002604 | 9,105044204 | 9,092757141 | 9,309089764 | 9,539798574 |           |              |
| PCP002606 | 9,138706975 | 9,192292814 | 9,05709822  | 9,165736112 | PCP002606 | XM_017323217 |
| PCP002612 | 9,004698008 | 8,76927586  | 8,923832563 | 8,846524657 | PCP002612 | XM_008360149 |
| PCP002617 | 9,16824589  | 9,130132926 | 9,014941046 | 8,642665475 | PCP002617 | XM_009371100 |
| PCP002623 | 8,798730993 | 8,797661526 | 9,159871337 | 9,49119171  | PCP002623 | XM_021952634 |
| PCP002626 | 10,9708249  | 11,34077922 | 10,70130646 | 11,73329926 | PCP002626 | XM_008356207 |
| PCP002631 | 9,790071499 | 9,534633604 | 9,741466986 | 8,956143797 | PCP002631 | XM_009356484 |
| PCP002648 | 9,705062108 | 9,651051691 | 9,671841781 | 9,543669869 | PCP002648 | XM_009376744 |
| PCP002649 | 10,18652284 | 9,680060579 | 10,11504365 | 11,78299821 | PCP002649 | XM_009376645 |
| PCP002655 | 10,6070251  | 10,57080444 | 10,70418897 | 10,06249143 | PCP002655 | XM_009360716 |
| PCP002679 | 9,158180476 | 9,236803511 | 9,21269092  | 9,173252384 |           |              |
| PCP002682 | 9,294620749 | 9,435316054 | 9,423473125 | 9,384416825 | PCP002682 | XM_018652403 |
| PCP002703 | 9,327170869 | 9,431142371 | 9,394462695 | 9,30986284  | PCP002703 | XM_009381309 |
| PCP002711 | 8,548166865 | 8,72904287  | 8,929761415 | 9,281535984 | PCP002711 | XM_008377342 |
| PCP002734 | 9,556506055 | 9,59058705  | 9,637838439 | 10,15059775 |           |              |
| PCP002735 | 11,46471421 | 11,45857579 | 11,61409786 | 11,7965791  | PCP002735 | XM_009368364 |
| PCP002740 | 10,46794173 | 10,87805091 | 11,04211762 | 11,25306153 | PCP002740 | XM_009354706 |

|           |             |             |             |             |           |              |
|-----------|-------------|-------------|-------------|-------------|-----------|--------------|
| PCP002743 | 9,163221961 | 9,290018847 | 9,270692451 | 9,307587905 |           |              |
| PCP002744 | 11,25404243 | 11,25128712 | 11,22661088 | 11,10721708 | PCP002744 | XM_018645898 |
| PCP002747 | 8,832890014 | 9,021451966 | 9,216745858 | 9,744278848 | PCP002747 | XM_009368056 |
| PCP002748 | 13,44303029 | 13,63314623 | 13,89630118 | 14,54049133 | PCP002748 | XM_008367198 |
| PCP002749 | 9,216745858 | 9,019590728 | 9,015888903 | 8,668884984 | PCP002749 | XM_008350248 |
| PCP002753 | 10,10983065 | 10,07771032 | 10,24436384 | 10,52323849 |           |              |
| PCP002767 | 8,75598914  | 8,87958325  | 8,889747307 | 8,833933692 |           |              |
| PCP002775 | 9,021451966 | 9,06520069  | 9,033423002 | 9,400879436 | PCP002775 | XM_009371287 |
| PCP002805 | 10,68503783 | 10,85096815 | 10,86573327 | 10,78600002 | PCP002805 | XM_018647438 |
| PCP002811 | 10,25738784 | 9,962418883 | 10,15566576 | 10,53365094 | PCP002811 | XM_009355815 |
| PCP002832 | 10,00516135 | 10,11547288 | 10,13057056 | 10,04439412 | PCP002832 | XM_018644060 |
| PCP002873 | 9,71596199  | 9,998124969 | 9,762099618 | 9,614709844 | PCP002873 | XM_009367639 |
| PCP002891 | 10,32904509 | 10,23082505 | 10,25856603 | 10,26912668 |           |              |
| PCP002899 | 9,820705514 | 9,54239349  | 9,532024681 | 9,267559206 | PCP002899 | XM_009373046 |
| PCP002914 | 8,530094158 | 8,653454181 | 9,06250492  | 9,410090898 | PCP002914 | XM_009365576 |
| PCP002915 | 9,008428622 | 9,059804103 | 9,227206781 | 9,582461918 |           |              |
| PCP002943 | 12,72785027 | 12,70735913 | 12,73096468 | 13,02750346 | PCP002943 | XM_009361127 |
| PCP002947 | 9,72395099  | 9,701011827 | 9,716527978 | 9,682994584 |           |              |
| PCP002971 | 9,126704473 | 9,199672345 | 9,368506462 | 9,274564521 |           |              |
| PCP002982 | 9,243959396 | 9,456703495 | 10,08613623 | 11,35773343 | PCP002982 | XM_009338561 |
| PCP003028 | 9,416438656 | 9,481133419 | 9,281535984 | 9,296916207 | PCP003028 | XM_009345875 |
| PCP003035 | 10,73131903 | 12,16165784 | 10,53527538 | 10,45635442 | PCP003035 | XM_009341337 |
| PCP003104 | 10,7153872  | 10,62662165 | 10,81003334 | 10,6183855  |           |              |
| PCP003219 | 9,700439718 | 9,82707272  | 9,872936465 | 10,38658465 |           |              |
| PCP003291 | 9,026053072 | 9,335390355 | 9,247144259 | 9,44362737  | PCP003291 | XM_009362131 |
| PCP003305 | 10,01029032 | 9,82124782  | 9,937623934 | 9,36047402  | PCP003305 | XM_009362103 |
| PCP003319 | 10,57837269 | 10,78953364 | 10,88111396 | 11,72720999 | PCP003319 | XM_009362086 |
| PCP003346 | 10,92925841 | 11,42504277 | 10,73301532 | 10,41574177 | PCP003346 | XM_009362050 |
| PCP003359 | 8,779161208 | 8,790087794 | 8,854868383 | 9,285402219 | PCP003359 | XM_009358062 |
| PCP003361 | 9,574271841 | 9,769837844 | 9,84757418  | 10,18239435 | PCP003361 | XM_009358066 |
| PCP003367 | 11,86328418 | 11,77492292 | 11,74160602 | 12,13442632 | PCP003367 | XM_009358078 |
| PCP003374 | 9,481133419 | 9,530737953 | 9,574271841 | 10,13528603 |           |              |
| PCP003375 | 9,240004193 | 9,076815597 | 9,017727086 | 9,340584522 | PCP003375 | XM_008368572 |
| PCP003387 | 14,22020221 | 13,84185915 | 14,10876946 | 14,6912348  |           |              |
| PCP003398 | 9,204571144 | 9,430452552 | 9,680060579 | 9,988684687 | PCP003398 | XM_009351180 |
| PCP003423 | 10,3479867  | 10,36377339 | 10,31288296 | 10,3140167  | PCP003423 | XM_009361193 |
| PCP003445 | 10,85823749 | 10,91039539 | 10,88722062 | 10,71166697 | PCP003445 | XM_008369453 |
| PCP003459 | 10,85383195 | 10,76928413 | 10,64655871 | 10,56160299 | PCP003459 | XM_018649832 |
| PCP003473 | 9,840258649 | 9,965784285 | 10,00516135 | 10,29539013 |           |              |
| PCP003486 | 9,813252106 | 9,786269628 | 10,01029032 | 10,52519778 |           |              |
| PCP003500 | 12,20447027 | 11,88226093 | 11,77971936 | 11,8917837  | PCP003500 | XM_009378911 |
| PCP003502 | 9,445014846 | 9,447765141 | 9,560963278 | 9,444331629 | PCP003502 | XM_009378915 |
| PCP003527 | 11,357552   | 11,8045344  | 11,75098746 | 12,39043769 |           |              |
| PCP003531 | 9,991521846 | 10,15860969 | 10,14720492 | 9,872413248 | PCP003531 | XM_009336058 |
| PCP003553 | 8,810571635 | 8,787902559 | 8,776992236 | 9,125852541 | PCP003553 | XM_008365757 |
| PCP003555 | 9,175749131 | 9,2589664   | 9,367043381 | 9,82336724  | PCP003555 | XR_001789798 |

|           |             |             |             |             |           |              |
|-----------|-------------|-------------|-------------|-------------|-----------|--------------|
| PCP003566 | 9,54689446  | 9,355351096 | 8,994353437 | 8,606109055 |           |              |
| PCP003575 | 11,4238145  | 11,33650656 | 11,44329065 | 11,33892019 | PCP003575 | XM_018646494 |
| PCP003576 | 12,7120261  | 12,96692537 | 13,01367161 | 13,86134575 | PCP003576 | XM_009353623 |
| PCP003579 | 10,23442228 | 10,26209485 | 10,43184231 | 10,90589088 |           |              |
| PCP003601 | 9,699867382 | 9,569229039 | 9,698131642 | 9,971543554 | PCP003601 | XM_009353579 |
| PCP003606 | 8,742578916 | 8,925791779 | 8,947403166 | 9,188168462 | PCP003606 | XM_009353563 |
| PCP003612 | 9,805211831 | 9,675374899 | 9,634212071 | 10,40479032 | PCP003612 | XM_009353553 |
| PCP003625 | 9,989635757 | 9,598666678 | 9,749316372 | 9,878556764 | PCP003625 | XM_008367573 |
| PCP003630 | 10,58433306 | 10,28617653 | 10,17326488 | 10,22560512 | PCP003630 | XM_009362382 |
| PCP003645 | 9,059804103 | 9,247927513 | 9,479113318 | 9,950308015 | PCP003645 | XM_008390134 |
| PCP003666 | 10,56478779 | 10,42975194 | 10,54528307 | 10,81698362 |           |              |
| PCP003669 | 12,23371853 | 11,96662441 | 12,01611184 | 12,25355206 | PCP003669 | XM_018648263 |
| PCP003693 | 9,408690635 | 9,335390355 | 9,490509963 | 9,802516365 | PCP003693 | XM_009361842 |
| PCP003707 | 9,406566431 | 9,193944186 | 8,950322598 | 8,555854491 | PCP003707 | XM_009374889 |
| PCP003716 | 9,046223651 | 9,142107057 | 9,140395236 | 9,495195473 | PCP003716 | XM_009374879 |
| PCP003736 | 10,42801464 | 10,21310422 | 10,46079375 | 10,65224447 | PCP003736 | XM_009368377 |
| PCP003751 | 10,4307975  | 10,4604559  | 10,57111741 | 10,85330956 |           |              |
| PCP003768 | 9,934177372 | 9,026053072 | 9,487840034 | 9,534633604 |           |              |
| PCP003769 | 9,463524373 | 9,637838439 | 9,613476402 | 9,942030594 | PCP003769 | XM_008355943 |
| PCP003791 | 9,887220615 | 9,811101704 | 9,887220615 | 9,506466274 |           |              |
| PCP003795 | 9,677719642 | 9,852264198 | 10,24594482 | 10,69319944 | PCP003795 | NM_001302283 |
| PCP003800 | 9,709083813 | 9,552035018 | 9,776433032 | 10,12325492 | PCP003800 | XM_009351268 |
| PCP003805 | 9,560332834 | 9,612260337 | 9,648051932 | 9,990572019 | PCP003805 | XM_009369706 |
| PCP003821 | 9,993886607 | 9,884170519 | 10,14168568 | 10,37286506 |           |              |
| PCP003827 | 8,825499451 | 9,105044204 | 9,486493158 | 10,00422047 | PCP003827 | XM_009365328 |
| PCP003839 | 12,6713929  | 12,82017896 | 12,75697323 | 13,13939147 |           |              |
| PCP003842 | 10,10764864 | 10,11286951 | 10,10022868 | 9,892284763 |           |              |
| PCP003856 | 10,34836301 | 10,30529798 | 10,72849027 | 10,63147721 | PCP003856 | XM_008368962 |
| PCP003858 | 9,745959978 | 9,420655031 | 9,417852515 | 9,583082768 | PCP003858 | XM_009345808 |
| PCP003866 | 9,125852541 | 9,339850003 | 9,49319498  | 9,330177419 | PCP003866 | XM_009345818 |
| PCP003892 | 9,338357556 | 10,01076585 | 9,792253453 | 9,661190213 |           |              |
| PCP003901 | 11,33966631 | 11,43810048 | 11,5372184  | 11,80372753 |           |              |
| PCP003907 | 9,115485887 | 9,014941046 | 9,102421932 | 8,910882535 | PCP003907 | XM_009344263 |
| PCP003908 | 8,820178962 | 8,81483878  | 9,367786025 | 9,892800824 |           |              |
| PCP003911 | 10,02974274 | 10,03799987 | 10,11981006 | 9,959031118 | PCP003911 | XM_009379821 |
| PCP003944 | 9,235224441 | 9,294620749 | 9,316666199 | 9,317412614 | PCP003944 | XM_009374254 |
| PCP003953 | 8,842350343 | 9,14974712  | 9,328674927 | 9,701011827 | PCP003953 | XM_009374245 |
| PCP003956 | 8,876516947 | 8,899870461 | 8,913876736 | 9,442259297 |           |              |
| PCP003971 | 9,040755473 | 8,95805965  | 8,735826768 | 8,911901261 | PCP003971 | XM_009362309 |
| PCP003973 | 11,01309233 | 11,0116955  | 11,13335417 | 10,63632554 | PCP003973 | XM_018648358 |
| PCP003984 | 12,16165784 | 11,83302052 | 11,73414649 | 11,89847669 | PCP003984 | XM_008364327 |
| PCP004009 | 10,48011362 | 10,49518548 | 10,74315139 | 10,91014051 | PCP004009 | XM_009371078 |
| PCP004024 | 15,62321479 | 15,99952288 | 15,89359377 | 16,15593825 |           |              |
| PCP004025 | 9,82124782  | 9,919861451 | 10,2772874  | 10,62632049 |           |              |
| PCP004048 | 10,42241173 | 10,57333476 | 10,77916942 | 11,42504277 |           |              |
| PCP004101 | 9,961927137 | 9,865733271 | 10,07414146 | 10,5714398  | PCP004101 | XM_009370232 |

|           |             |             |             |             |           |              |
|-----------|-------------|-------------|-------------|-------------|-----------|--------------|
| PCP004104 | 9,207819661 | 8,957102042 | 9,107661718 | 9,153121312 | PCP004104 | XM_017327067 |
| PCP004111 | 9,323437626 | 9,283088353 | 9,490509963 | 9,965308117 | PCP004111 | XM_009376325 |
| PCP004144 | 8,950322598 | 9,035266491 | 9,328674927 | 9,919861451 |           |              |
| PCP004145 | 10,9734606  | 11,05889143 | 11,42888355 | 11,56684844 |           |              |
| PCP004149 | 9,687673116 | 9,599299194 | 9,775330438 | 9,192292814 | PCP004149 | XM_018649493 |
| PCP004150 | 9,08127038  | 9,19640541  | 9,250298418 | 9,535916864 | PCP004150 | XM_018649293 |
| PCP004162 | 9,044394119 | 9,28000515  | 9,30833903  | 9,305309377 |           |              |
| PCP004163 | 8,824417827 | 8,893817229 | 8,968666793 | 9,40017499  | PCP004163 | XM_009366640 |
| PCP004167 | 10,94348917 | 11,08658078 | 11,19332206 | 11,61163809 | PCP004167 | XM_009356458 |
| PCP004169 | 11,2039597  | 11,20660538 | 11,41362793 | 11,92184094 | PCP004169 | XM_018647112 |
| PCP004170 | 8,804131021 | 8,960001932 | 9,020507757 | 8,921840937 | PCP004170 | XM_009356461 |
| PCP004181 | 8,885696373 | 9,207819661 | 9,625708843 | 9,960001932 |           |              |
| PCP004185 | 10,64985792 | 10,70735913 | 10,73893668 | 11,00702727 |           |              |
| PCP004264 | 10,5805695  | 10,61685205 | 10,55394602 | 10,58308277 |           |              |
| PCP004269 | 9,374322251 | 9,236014192 | 9,429762402 | 9,960972093 |           |              |
| PCP004275 | 12,28559584 | 12,18384315 | 12,24822409 | 12,04484831 | PCP004275 | XM_008388892 |
| PCP004278 | 9,922331667 | 9,880088564 | 9,95419631  | 10,37359384 |           |              |
| PCP004293 | 10,45601552 | 10,28693889 | 10,52160044 | 10,85200664 | PCP004293 | XM_009357281 |
| PCP004294 | 10,5685927  | 10,4498399  | 10,77148947 | 11,16113188 | PCP004294 | XM_009357279 |
| PCP004303 | 9,806823474 | 9,791700135 | 9,954676159 | 10,36705431 | PCP004303 | XM_008344061 |
| PCP004306 | 10          | 10,0018726  | 10,01726776 | 10,03112222 | PCP004306 | XM_008370319 |
| PCP004326 | 10,02974274 | 9,795503976 | 10,09364204 | 9,784634846 |           |              |
| PCP004331 | 10,58088979 | 10,41609025 | 9,940063949 | 10,05165759 | PCP004331 | XM_009373135 |
| PCP004344 | 9,938109326 | 9,942514505 | 10,13528603 | 10,45635442 | PCP004344 | XM_009367583 |
| PCP004347 | 10,43948809 | 10,57994757 | 10,60887391 | 10,39874369 |           |              |
| PCP004356 | 9,811101704 | 9,805211831 | 10,08480839 | 10,27844946 | PCP004356 | XM_008370672 |
| PCP004361 | 10,06564501 | 10,55362929 | 10,82230792 | 10,84809866 |           |              |
| PCP004374 | 10,56288157 | 10,38046107 | 10,50944843 | 10,46862404 | PCP004374 | XR_530954    |
| PCP004384 | 10,19023211 | 9,939094317 | 10,08967557 | 10,31137369 | PCP004384 | XM_018651498 |
| PCP004396 | 13,96662531 | 13,64903158 | 13,71799765 | 14,01468917 | PCP004396 | XM_009343297 |
| PCP004411 | 8,798730993 | 8,79983204  | 9,224797591 | 9,883666633 | PCP004411 | XM_008357532 |
| PCP004423 | 8,684152487 | 8,966736149 | 9,229611955 | 9,512404684 | PCP004423 | XM_008390609 |
| PCP004438 | 11,65999589 | 11,71051804 | 11,60208176 | 11,61025435 | PCP004438 | XM_018648757 |
| PCP004439 | 11,19824244 | 10,64024494 | 10,666224   | 9,948849023 | PCP004439 | XM_009364138 |
| PCP004449 | 9,026053072 | 9,038918989 | 9,071462363 | 9,706789535 |           |              |
| PCP004480 | 10,63178639 | 10,45532722 | 10,52160044 | 10,44052662 |           |              |
| PCP004488 | 10,20457114 | 10,29768437 | 10,35351076 | 10,62021983 |           |              |
| PCP004517 | 8,696967526 | 8,536558066 | 8,836050355 | 9,30833903  |           |              |
| PCP004531 | 11,20293802 | 11,24595076 | 11,3846057  | 11,67918537 | PCP004531 | XM_018646621 |
| PCP004555 | 10,74118887 | 10,67330908 | 10,76680218 | 10,76293841 | PCP004555 | XM_009341823 |
| PCP004576 | 9,766528909 | 9,870873272 | 9,991989442 | 9,825483551 | PCP004576 | XM_018652414 |
| PCP004591 | 8,628153873 | 8,593689902 | 8,98205238  | 9,354624059 | PCP004591 | XM_009359166 |
| PCP004607 | 9,613476402 | 10          | 10,23840474 | 10,52388535 |           |              |
| PCP004632 | 9,075024475 | 8,966736149 | 9,054387253 | 9,405843489 |           |              |
| PCP004636 | 9,214319121 | 9,160703421 | 9,340584522 | 9,591204414 | PCP004636 | XM_008344483 |
| PCP004662 | 8,762647796 | 9,010304306 | 9,505156537 | 10,35974956 | PCP004662 | XM_009364562 |

|           |             |             |             |             |           |              |
|-----------|-------------|-------------|-------------|-------------|-----------|--------------|
| PCP004665 | 10,07190476 | 10,08347933 | 10,12454785 | 10,41574177 |           |              |
| PCP004708 | 9,176597042 | 9,186535222 | 9,049848549 | 8,935666001 |           |              |
| PCP004739 | 8,827596761 | 9,156512913 | 9,080364533 | 9,515049296 | PCP004739 | XM_018643059 |
| PCP004763 | 9,884170519 | 9,974887762 | 10,06339508 | 10,80197505 |           |              |
| PCP004963 | 8,957102042 | 9,229611955 | 9,14381685  | 9,477090385 | PCP004963 | XM_009338924 |
| PCP004966 | 11,11265453 | 11,11092042 | 11,2898287  | 11,59525748 | PCP004966 | XM_009338930 |
| PCP004978 | 10,91637961 | 10,19188584 | 10,19967234 | 9,685326985 |           |              |
| PCP005009 | 8,568602197 | 8,677120596 | 8,86727874  | 9,735843688 | PCP005009 | XM_009363387 |
| PCP005028 | 11,07636803 | 11,09209641 | 11,23182118 | 11,54962586 | PCP005028 | XM_018648558 |
| PCP005045 | 9,582461918 | 9,428360173 | 9,587458757 | 9,564778269 |           |              |
| PCP005049 | 10,98061802 | 10,70015358 | 11,13656183 | 13,58812901 |           |              |
| PCP005072 | 9,257387843 | 9,263668263 | 9,434628228 | 9,741466986 | PCP005072 | XM_009341266 |
| PCP005091 | 9,63481105  | 9,706789535 | 9,879077758 | 10,29920802 | PCP005091 | XM_009347721 |
| PCP005114 | 10,92728167 | 11,26268214 | 11,29443121 | 11,97309821 |           |              |
| PCP005120 | 8,915879379 | 8,898843202 | 8,918863237 | 8,699294818 |           |              |
| PCP005123 | 11,33706434 | 11,30187911 | 11,24812326 | 11,06339508 |           |              |
| PCP005134 | 9,332417038 | 9,365600686 | 9,408690635 | 9,208648936 | PCP005134 | XM_009360346 |
| PCP005137 | 10,05528244 | 10,2510918  | 10,31514956 | 10,61132917 | PCP005137 | XM_009360342 |
| PCP005138 | 10,62844554 | 10,49585503 | 10,51274046 | 10,59588217 | PCP005138 | XM_009360341 |
| PCP005180 | 9,808964175 | 9,725076497 | 10,13699111 | 10,06653324 | PCP005180 | XM_017330903 |
| PCP005181 | 9,040755473 | 9,829199465 | 9,41715631  | 7,231989133 | PCP005181 | XM_008388366 |
| PCP005211 | 9,07325791  | 9,101529272 | 9,385862401 | 9,795503976 |           |              |
| PCP005217 | 9,957580925 | 9,825483551 | 9,956129273 | 10,2644426  | PCP005217 | XM_009340859 |
| PCP005227 | 9,625708843 | 9,718241739 | 9,880609006 | 10,15987134 | PCP005227 | XM_009340834 |
| PCP005236 | 9,380828997 | 9,296159109 | 9,530074645 | 9,80843332  |           |              |
| PCP005237 | 9,393755108 | 9,333893285 | 9,162391329 | 8,956143797 |           |              |
| PCP005243 | 9,990103964 | 9,914878405 | 10,07012094 | 10,34429591 | PCP005243 | XM_018646459 |
| PCP005268 | 11,13013936 | 10,92431519 | 10,71996202 | 10,88874325 | PCP005268 | XM_009380206 |
| PCP005281 | 10,17949861 | 10,24594482 | 9,987732989 | 9,874981348 | PCP005281 | XM_009380222 |
| PCP005299 | 9,224001674 | 9,355351096 | 9,486493158 | 9,820178962 |           |              |
| PCP005300 | 8,941546519 | 8,885696373 | 9,076815597 | 8,911901261 | PCP005300 | XM_009356265 |
| PCP005305 | 8,606109055 | 9,089238597 | 9,008428622 | 8,70276142  | PCP005305 | XM_009356260 |
| PCP005306 | 8,953236133 | 8,931712601 | 9,102421932 | 8,982993575 | PCP005306 | XM_009356258 |
| PCP005311 | 9,955649908 | 10,0918717  | 10,09671515 | 10,39695792 | PCP005311 | XM_009369235 |
| PCP005313 | 8,707359132 | 8,890781061 | 8,887738491 | 9,466932951 | PCP005313 | XM_008246533 |
| PCP005320 | 9,776975792 | 9,901364723 | 10,05120894 | 10,44363773 |           |              |
| PCP005324 | 10,09583214 | 10,15186643 | 10,50845837 | 10,64295422 |           |              |
| PCP005335 | 12,38154295 | 12,31477299 | 12,38954261 | 12,26873789 | PCP005335 | XM_008365068 |
| PCP005372 | 10,09011242 | 10,28193003 | 10,23561937 | 10,51503944 |           |              |
| PCP005384 | 10,34096276 | 10,44639065 | 10,61225112 | 10,54754044 |           |              |
| PCP005389 | 9,534633604 | 9,840258649 | 9,800366069 | 10,04257594 | PCP005389 | XM_017326810 |
| PCP005400 | 10,06160071 | 10,18858885 | 10,13057056 | 10,11504365 |           |              |
| PCP005409 | 9,774243476 | 9,648663167 | 9,586839788 | 9,564778269 | PCP005409 | XM_017336962 |
| PCP005418 | 8,505136683 | 8,74708524  | 8,843387202 | 9,285402219 |           |              |
| PCP005432 | 10,66799854 | 10,83605036 | 10,94617524 | 11,41626974 | PCP005432 | XM_009357906 |
| PCP005443 | 10,67683861 | 10,32530546 | 10,18570552 | 10,83605036 | PCP005443 | XM_009357925 |

|           |             |             |             |             |           |              |
|-----------|-------------|-------------|-------------|-------------|-----------|--------------|
| PCP005452 | 11,17097033 | 11,09824926 | 11,20559167 | 10,93540818 |           |              |
| PCP005453 | 9,236014192 | 8,962896005 | 9,219967107 | 8,965784285 |           |              |
| PCP005459 | 10,30415735 | 10,21916852 | 10,13741386 | 9,54173552  | PCP005459 | XM_009346124 |
| PCP005468 | 9,691743519 | 9,972017669 | 10,24397129 | 10,53267735 | PCP005468 | XM_009346132 |
| PCP005508 | 9,118941073 | 9,354624059 | 9,605479518 | 9,850186838 | PCP005508 | XM_008388539 |
| PCP005510 | 9,743706817 | 9,86727874  | 9,856939018 | 9,838683946 | PCP005510 | XM_009380647 |
| PCP005511 | 11,26756506 | 11,23062093 | 11,09077405 | 10,90137227 | PCP005511 | XM_008370901 |
| PCP005517 | 10,93344723 | 10,82362996 | 10,86753358 | 11,21310422 |           |              |
| PCP005521 | 10,38729576 | 10,58840545 | 10,48984796 | 10,05799172 | PCP005521 | XM_018650697 |
| PCP005537 | 10,43567026 | 10,52747701 | 10,52127653 | 10,86289302 | PCP005537 | XM_018651278 |
| PCP005545 | 10,99811792 | 11,20314608 | 11,12820704 | 10,82654849 | PCP005545 | XM_008343599 |
| PCP005563 | 9,745959978 | 10,45840661 | 10,12110608 | 9,816983623 | PCP005563 | XM_009376245 |
| PCP005567 | 9,479113318 | 9,529430554 | 9,709652505 | 9,596189756 | PCP005567 | XM_009366615 |
| PCP005571 | 9,079484784 | 9,174101763 | 9,183213552 | 8,979196518 |           |              |
| PCP005574 | 8,754887502 | 8,803065551 | 8,856954575 | 9,324923085 |           |              |
| PCP005605 | 9,835529375 | 9,63540978  | 9,775890069 | 10,09319305 |           |              |
| PCP005616 | 8,657032562 | 9,203763987 | 8,717676423 | 8,89684702  | PCP005616 | XM_008350730 |
| PCP005628 | 9,485165154 | 9,483150695 | 9,536577492 | 9,905883363 |           |              |
| PCP005634 | 8,978224236 | 9,002815016 | 9,174101763 | 9,627533884 | PCP005634 | XM_009352933 |
| PCP005638 | 7,886733033 | 8,915879379 | 9,553302899 | 9,645658432 |           |              |
| PCP005713 | 8,959045612 | 8,779161208 | 9,02699366  | 9,29156212  | PCP005713 | XM_009374923 |
| PCP005719 | 11,95952023 | 12,10339601 | 12,10656294 | 12,36677845 |           |              |
| PCP005769 | 9,995767151 | 10,08967557 | 10,16323454 | 10,47404051 | PCP005769 | XM_009364868 |
| PCP005771 | 9,151447887 | 9,362667132 | 8,976334992 | 8,973467779 | PCP005771 | XM_009378275 |
| PCP005786 | 9,539798574 | 10,17201489 | 10,15396996 | 10,51241456 | PCP005786 | XM_008366971 |
| PCP005790 | 10,50216549 | 10,33390446 | 10,3818998  | 10,49852015 |           |              |
| PCP005808 | 9,545601627 | 9,387306529 | 9,529430554 | 9,406566431 | PCP005808 | XM_009346174 |
| PCP005828 | 10,31098761 | 10,67183294 | 11,00187963 | 11,4176785  |           |              |
| PCP005843 | 10,27883273 | 10,48817153 | 10,56985561 | 10,7968508  | PCP005843 | XM_009374151 |
| PCP005863 | 11,6251015  | 11,35259523 | 11,18673329 | 11,20701432 | PCP005863 | XM_009361670 |
| PCP005872 | 9,453270634 | 9,369226538 | 9,532024681 | 9,248710343 |           |              |
| PCP005877 | 9,637838439 | 9,915879379 | 9,425572598 | 8,120652609 | PCP005877 | XM_009348635 |
| PCP005878 | 10,00936677 | 9,960001932 | 9,910897522 | 9,983948403 | PCP005878 | XM_009336356 |
| PCP005899 | 14,13736503 | 14,7343217  | 14,35291725 | 14,50767078 | PCP005899 | XM_009378211 |
| PCP005934 | 9,381542951 | 9,197216693 | 9,428360173 | 9,364856916 |           |              |
| PCP005943 | 9,550746785 | 9,501837185 | 9,640841416 | 9,953716302 |           |              |
| PCP005969 | 11,69682412 | 11,35332881 | 11,43462823 | 11,59789891 | PCP005969 | XM_008383021 |
| PCP005981 | 8,544307635 | 8,880593701 | 9,159871337 | 9,412929682 | PCP005981 | XM_009350948 |
| PCP005987 | 10,14805706 | 10,13057056 | 10,04984855 | 10,13143258 |           |              |
| PCP005988 | 10,11591499 | 10,30073006 | 10,30985147 | 9,898344415 |           |              |
| PCP005990 | 12,54407817 | 12,64393058 | 12,67970001 | 13,00462955 | PCP005990 | XM_009348327 |
| PCP005992 | 8,662953148 | 8,844454703 | 8,894817763 | 9,222384371 | PCP005992 | XM_009337475 |
| PCP006014 | 8,696967526 | 8,857980995 | 9,135273206 | 9,439477697 | PCP006014 | XM_009370463 |
| PCP006015 | 10,14551188 | 9,892284763 | 10,1852843  | 10,31628153 | PCP006015 | XM_018650119 |
| PCP006018 | 9,135273206 | 9,02699366  | 9,230428801 | 9,120678526 | PCP006018 | XM_009379343 |
| PCP006032 | 8,764871591 | 8,918863237 | 9,055282436 | 9,40017499  |           |              |

|           |             |             |             |             |           |              |
|-----------|-------------|-------------|-------------|-------------|-----------|--------------|
| PCP006041 | 8,61717357  | 8,752648252 | 8,859006685 | 9,183213552 | PCP006041 | XM_009369480 |
| PCP006062 | 9,412209922 | 9,551381432 | 9,641455713 | 9,434628228 | PCP006062 | XM_008385564 |
| PCP006066 | 8,791162889 | 8,812722827 | 8,900866808 | 9,501837185 |           |              |
| PCP006087 | 9,018673116 | 8,829722735 | 9,022367813 | 9,262094845 |           |              |
| PCP006118 | 10,47505448 | 10,67624801 | 10,62113611 | 11,15987134 | PCP006118 | XM_009349951 |
| PCP006126 | 8,988684687 | 9,068778278 | 9,123267853 | 8,968666793 | PCP006126 | XM_009369674 |
| PCP006158 | 9,470313155 | 9,399448837 | 9,719388821 | 9,972505988 |           |              |
| PCP006168 | 8,714245518 | 8,847589839 | 9,18157469  | 10,30035256 |           |              |
| PCP006180 | 8,803065551 | 8,831845581 | 8,798730993 | 9,44362737  | PCP006180 | XM_009358356 |
| PCP006195 | 10,00235092 | 9,915386449 | 10,27418011 | 10,95443625 |           |              |
| PCP006212 | 9,598666678 | 9,71539578  | 10,02329694 | 10,47269084 | PCP006212 | XM_009350374 |
| PCP006218 | 10,38729576 | 10,00748986 | 10,31250862 | 10,72962074 | PCP006218 | XM_009374162 |
| PCP006236 | 9,09011242  | 9,215945486 | 9,247144259 | 9,564778269 |           |              |
| PCP006250 | 11,07124111 | 10,39732167 | 10,28693889 | 10,11677281 | PCP006250 | XM_008365255 |
| PCP006260 | 9,678899386 | 9,764871591 | 9,896332404 | 10,23361968 |           |              |
| PCP006304 | 9,992938336 | 9,686500527 | 10,17367714 | 10,55074679 | PCP006304 | XM_009375301 |
| PCP006308 | 9,377926277 | 9,282323962 | 9,273795599 | 10,04347848 | PCP006308 | XM_009341004 |
| PCP006335 | 9,275356315 | 9,262870027 | 9,271463028 | 9,673609422 | PCP006335 | XM_008354757 |
| PCP006343 | 9,528121969 | 8,886702554 | 9,014941046 | 8,75598914  | PCP006343 | XM_009352192 |
| PCP006345 | 10,41609025 | 10,20783186 | 10,29499975 | 9,970580478 |           |              |
| PCP006351 | 10,76818432 | 10,67213359 | 10,91637961 | 11,1219673  | PCP006351 | XM_009365035 |
| PCP006451 | 9,600526229 | 9,796039609 | 9,761551232 | 9,784634846 | PCP006451 | XM_009359189 |
| PCP006464 | 9,20537785  | 8,9905862   | 9,194756854 | 8,375039431 |           |              |
| PCP006547 | 9,764324258 | 9,769292392 | 9,72395099  | 9,393025715 |           |              |
| PCP006553 | 9,532024681 | 9,49319498  | 9,754887502 | 9,977279923 | PCP006553 | XM_009367725 |
| PCP006555 | 8,781359714 | 8,797661526 | 9,200481794 | 9,299208018 |           |              |
| PCP006562 | 10,41996018 | 10,39553414 | 10,57868403 | 10,26600174 | PCP006562 | XM_009372569 |
| PCP006572 | 9,316666199 | 9,506466274 | 9,560963278 | 9,906394584 | PCP006572 | XM_009372583 |
| PCP006576 | 9,19640541  | 9,013099307 | 9,215120395 | 9,478425839 | PCP006576 | XM_009372586 |
| PCP006582 | 9,326429487 | 9,44362737  | 9,594940371 | 9,829199465 | PCP006582 | XM_018650610 |
| PCP006597 | 10,03525274 | 10,017741   | 10,08922535 | 10,02883157 | PCP006597 | XM_009372629 |
| PCP006627 | 9,930737338 | 9,79387963  | 9,773139207 | 9,646252679 | PCP006627 | XM_009374857 |
| PCP006628 | 9,517019734 | 9,199672345 | 9,442943496 | 9,19063955  | PCP006628 | XM_009374854 |
| PCP006652 | 10,20619632 | 10,26130749 | 10,24198315 | 10,60021957 | PCP006652 | XM_008376204 |
| PCP006653 | 9,657014692 | 9,761002638 | 9,721099189 | 9,625708843 |           |              |
| PCP006663 | 9,567956075 | 9,578693464 | 10,21513253 | 10,62509694 | PCP006663 | XM_008376223 |
| PCP006667 | 10,02836195 | 10,10328781 | 10,18694371 | 10,49852015 | PCP006667 | XM_008376236 |
| PCP006670 | 10,4841482  | 10,03846636 | 10,30833903 | 10,50613895 |           |              |
| PCP006682 | 10,89153311 | 10,64626168 | 10,61868833 | 10,37685252 | PCP006682 | XM_008376247 |
| PCP006694 | 8,402287298 | 8,63542792  | 9,008428622 | 9,423473125 | PCP006694 | XM_009340927 |
| PCP006705 | 8,874458871 | 8,810571635 | 8,993419626 | 9,235224441 | PCP006705 | XM_008394927 |
| PCP006707 | 9,974887762 | 9,803049401 | 9,995300778 | 10,22560512 |           |              |
| PCP006727 | 11,35038674 | 11,32324058 | 11,39696327 | 11,66237019 | PCP006727 | XM_009345153 |
| PCP006732 | 10,8917837  | 10,87088098 | 10,99270471 | 10,69232781 |           |              |
| PCP006739 | 9,221587121 | 9,28077077  | 9,211888295 | 9,092757141 |           |              |
| PCP006751 | 9,195569065 | 9,317412614 | 9,105044204 | 9,09011242  | PCP006751 | XM_009371189 |

|           |             |             |             |             |           |              |
|-----------|-------------|-------------|-------------|-------------|-----------|--------------|
| PCP006752 | 9,021451966 | 9,184057088 | 8,836050355 | 8,881634033 | PCP006752 | XM_009371190 |
| PCP006768 | 9,911391988 | 10,17158965 | 10,4101015  | 10,5552314  | PCP006768 | XM_009371164 |
| PCP006775 | 9,599912842 | 9,719388821 | 10,32080055 | 10,71109047 | PCP006775 | XM_009353309 |
| PCP006777 | 8,851749041 | 8,892785649 | 8,985841937 | 8,794415866 | PCP006777 | XM_009353307 |
| PCP006779 | 10,12799432 | 10,06383996 | 10,12541347 | 9,976807535 | PCP006779 | XM_009353303 |
| PCP006789 | 12,95474158 | 12,82542194 | 12,99735593 | 13,3076747  | PCP006789 | XM_008390936 |
| PCP006795 | 9,8008999   | 9,628755372 | 9,807886174 | 10,06699059 | PCP006795 | XR_001952855 |
| PCP006796 | 9,271463028 | 9,440869168 | 9,582461918 | 9,824958741 | PCP006796 | XM_009353278 |
| PCP006805 | 10,74455637 | 10,75126788 | 10,98536523 | 11,50448633 | PCP006805 | XM_018646423 |
| PCP006809 | 9,337621902 | 9,530074645 | 9,537218401 | 9,47100451  |           |              |
| PCP006825 | 9,602383386 | 9,193106413 | 9,288473922 | 9,230428801 | PCP006825 | XM_008364446 |
| PCP006845 | 9,068778278 | 8,957102042 | 9,126704473 | 9,596804728 |           |              |
| PCP006847 | 9,630576566 | 9,553955615 | 9,630576566 | 10,01355996 | PCP006847 | XM_008359933 |
| PCP006851 | 10,13228122 | 10,11200937 | 10,29155061 | 10,2463487  | PCP006851 | XR_669353    |
| PCP006853 | 10,5533125  | 10,46352437 | 10,68999797 | 10,96698843 | PCP006853 | XM_009373548 |
| PCP006862 | 9,269898093 | 9,141264175 | 9,353874607 | 9,254249162 | PCP006862 | XM_008379862 |
| PCP006863 | 12,47725232 | 12,05923291 | 12,42556473 | 12,87466059 | PCP006863 | XM_008379861 |
| PCP006868 | 9,147204925 | 9,184875343 | 9,497193195 | 9,654045226 | PCP006868 | XM_008349404 |
| PCP006883 | 9,856939018 | 10,03021191 | 10,15101654 | 10,60733031 | PCP006883 | XM_009355137 |
| PCP006884 | 11,44086917 | 11,32792871 | 11,40123686 | 11,42678889 | PCP006884 | XM_009355140 |
| PCP006889 | 9,768184325 | 9,822299952 | 9,96337297  | 10,32680023 |           |              |
| PCP006894 | 10,8159196  | 10,98513037 | 11,17471975 | 10,89860139 | PCP006894 | XM_009355153 |
| PCP006903 | 9,508448461 | 9,895832748 | 9,86004717  | 10,15650027 | PCP006903 | XM_009355165 |
| PCP006904 | 9,625708843 | 9,656424863 | 9,839723443 | 10,07547915 |           |              |
| PCP006917 | 10,23760435 | 10,25817734 | 10,38118602 | 10,19681111 | PCP006917 | XM_017332383 |
| PCP006932 | 8,956143797 | 8,874458871 | 8,972491628 | 8,652235507 | PCP006932 | XM_008373662 |
| PCP006989 | 9,371406396 | 9,477758266 | 9,555873659 | 9,924322617 |           |              |
| PCP007005 | 10,2495046  | 10,10983065 | 10,24475627 | 10,18198458 | PCP007005 | XM_009350243 |
| PCP007018 | 9,340584522 | 9,049848549 | 9,06520069  | 9,080364533 | PCP007018 | XM_009355876 |
| PCP007033 | 8,946409212 | 8,951284715 | 9,138706975 | 8,797661526 |           |              |
| PCP007052 | 11,5533077  | 11,64790807 | 11,72309348 | 11,59494503 | PCP007052 | XM_009340241 |
| PCP007060 | 10,28308835 | 10,04667385 | 10,27844946 | 10,31250862 | PCP007060 | XM_009340221 |
| PCP007061 | 10,45463859 | 10,61746747 | 10,87369787 | 10,63269536 |           |              |
| PCP007073 | 9,790625442 | 9,839723443 | 9,975847968 | 10,32305476 | PCP007073 | XM_009359388 |
| PCP007079 | 8,782441329 | 8,653454181 | 9,135273206 | 9,303780748 | PCP007079 | XM_009337632 |
| PCP007089 | 9,430452552 | 9,318926875 | 9,380828997 | 9,374322251 |           |              |
| PCP007098 | 9,584342459 | 9,74819285  | 9,654045226 | 10,27184816 |           |              |
| PCP007145 | 9,075933681 | 9,2589664   | 9,048949988 | 8,956143797 | PCP007145 | XR_664419    |
| PCP007174 | 9,273795599 | 9,247144259 | 9,442943496 | 9,857467877 | PCP007174 | XM_018646698 |
| PCP007215 | 8,943481842 | 8,923832563 | 9,098900598 | 9,378663341 | PCP007215 | XM_018643510 |
| PCP007219 | 12,31127434 | 12,68897803 | 12,86708565 | 13,24520655 | PCP007219 | XM_009359442 |
| PCP007235 | 8,654636029 | 8,882643049 | 9,17990909  | 9,028817757 |           |              |
| PCP007238 | 11,27068661 | 11,31288296 | 11,05979734 | 10,86598839 | PCP007238 | XM_008379760 |
| PCP007251 | 9,648051932 | 9,673609422 | 9,655226589 | 9,669469742 | PCP007251 | XM_009355817 |
| PCP007256 | 8,753785022 | 8,782441329 | 8,882643049 | 9,546257836 |           |              |
| PCP007306 | 12,12422796 | 12,0780407  | 12,08657746 | 12,44914865 |           |              |



|           |             |             |             |             |           |              |
|-----------|-------------|-------------|-------------|-------------|-----------|--------------|
| PCP007308 | 8,526186214 | 8,666508075 | 8,866258916 | 9,567956075 | PCP007308 | XM_009378237 |
| PCP007329 | 9,388017285 | 9,438791853 | 9,557138173 | 9,248710343 | PCP007329 | XM_009374604 |
| PCP007362 | 10,33464201 | 10,40194612 | 10,49852015 | 10,41609025 |           |              |
| PCP007377 | 9,224797591 | 9,282323962 | 9,73357466  | 10,43740878 | PCP007377 | XM_009354932 |
| PCP007383 | 9,84862294  | 9,77478706  | 9,81805485  | 9,709652505 | PCP007383 | XM_018649622 |
| PCP007385 | 9,749316372 | 9,732455766 | 9,817511342 | 9,742595757 | PCP007385 | XM_009367859 |
| PCP007394 | 9,773683206 | 9,402308618 | 9,667111542 | 8,821231873 | PCP007394 | XM_018642796 |
| PCP007404 | 8,943481842 | 9,145499145 | 9,124121312 | 8,985841937 | PCP007404 | XM_009361591 |
| PCP007405 | 10,09364204 | 10,26053147 | 10,17201489 | 10,07146236 | PCP007405 | XM_009361593 |
| PCP007407 | 9,016808288 | 9,058884672 | 9,160703421 | 9,4743752   | PCP007407 | XM_009361598 |
| PCP007417 | 9,701601036 | 9,73357466  | 9,850186838 | 10,37431138 | PCP007417 | XM_009337451 |
| PCP007422 | 11,16679075 | 11,06922821 | 11,07859783 | 11,40939094 | PCP007422 | XM_009337450 |
| PCP007430 | 9,994353437 | 9,962896005 | 9,869855987 | 10,22118833 |           |              |
| PCP007459 | 8,61717357  | 8,845490051 | 8,875503635 | 9,253445696 | PCP007459 | XM_009370214 |
| PCP007484 | 9,693486957 | 9,54689446  | 9,730181399 | 10,01262454 |           |              |
| PCP007502 | 10,51471405 | 10,53883882 | 10,49252419 | 10,48683502 | PCP007502 | XM_009353491 |
| PCP007514 | 8,970594857 | 8,965784285 | 9,092757141 | 8,854868383 | PCP007514 | XM_018647897 |
| PCP007530 | 11,55458885 | 11,70836401 | 11,59463719 | 11,72195361 | PCP007530 | XM_008385520 |
| PCP007555 | 10,28886607 | 10,01076585 | 10,23442228 | 10,58120058 | PCP007555 | XM_009369054 |
| PCP007557 | 8,857980995 | 9,045295522 | 9,300741498 | 9,688250309 | PCP007557 | XM_008361573 |
| PCP007582 | 10,91214086 | 11,0577684  | 11,02813399 | 11,53251665 |           |              |
| PCP007590 | 9,555873659 | 9,438105682 | 9,696967526 | 10,09759763 |           |              |
| PCP007604 | 8,961941603 | 8,568602197 | 9,21916852  | 9,607940556 | PCP007604 | XM_008351562 |
| PCP007642 | 10,25384748 | 10,37431138 | 10,50216549 | 10,84549005 | PCP007642 | XM_008362479 |
| PCP007654 | 9,925302224 | 9,889245365 | 10,00468396 | 9,901364723 |           |              |
| PCP007658 | 9,068778278 | 9,137836494 | 9,531381461 | 9,861086906 | PCP007658 | XM_008356085 |
| PCP007669 | 9,402308618 | 9,460803985 | 9,904890476 | 10,39695792 | PCP007669 | XM_009379019 |
| PCP007676 | 9,850186838 | 9,765982204 | 9,907386437 | 10,14082977 | PCP007676 | XM_009359602 |
| PCP007677 | 12,00796282 | 11,91251514 | 11,92518352 | 11,74062404 |           |              |
| PCP007681 | 10,58683979 | 9,815383296 | 10,14507876 | 10,18404469 | PCP007681 | XM_009380262 |
| PCP007714 | 8,978224236 | 8,923832563 | 8,811631578 | 8,85277917  |           |              |
| PCP007715 | 9,716527978 | 9,839203788 | 9,918371326 | 10,26600174 | PCP007715 | XM_009372514 |
| PCP007718 | 9,296159109 | 8,969616759 | 9,416438656 | 8,689997971 | PCP007718 | XM_008369462 |
| PCP007734 | 9,910897522 | 9,899356923 | 10,00562455 | 9,87036472  | PCP007734 | XM_008387377 |
| PCP007737 | 10,20252792 | 10,22680954 | 10,36814629 | 10,61440618 | PCP007737 | XM_008341105 |
| PCP007740 | 9,019590728 | 8,927777962 | 8,922822231 | 8,613494819 | PCP007740 | XM_009349550 |
| PCP007754 | 9,535275377 | 9,126704473 | 9,047123912 | 8,715378619 | PCP007754 | XM_009336728 |
| PCP007757 | 9,089238597 | 9,243959396 | 9,566681988 | 9,925302224 | PCP007757 | XM_018648832 |
| PCP007805 | 10,45498809 | 10,27612441 | 10,41397693 | 10,21634573 | PCP007805 | XM_009348277 |
| PCP007806 | 10,03983752 | 10,1476247  | 10,11331242 | 10,65612986 | PCP007806 | XM_008375617 |
| PCP007816 | 9,192292814 | 9,49251418  | 9,77478706  | 10,30947635 | PCP007816 | XM_008384221 |
| PCP007829 | 11,19680496 | 11,04553444 | 11,35296482 | 11,25306153 | PCP007829 | XM_008395375 |
| PCP007897 | 9,220789431 | 9,460803985 | 9,391608782 | 9,38945926  | PCP007897 | XM_009368334 |
| PCP007902 | 11,09341756 | 11,08214904 | 11,03891899 | 11,35718359 | PCP007902 | XM_009355935 |
| PCP007936 | 9,050746552 | 9,10938668  | 9,140395236 | 9,080364533 |           |              |
| PCP007952 | 12,49460562 | 12,43297767 | 12,2533541  | 12,52102865 |           |              |

|           |             |             |             |             |           |              |
|-----------|-------------|-------------|-------------|-------------|-----------|--------------|
| PCP008057 | 10,20416762 | 9,835529375 | 10,26678654 | 10,84287672 | PCP008057 | XM_018649862 |
| PCP008105 | 9,147204925 | 9,558420713 | 9,503169818 | 10,27146303 | PCP008105 | XM_009341766 |
| PCP008150 | 9,911886285 | 9,779719355 | 10,1628067  | 9,594940371 | PCP008150 | XM_009372373 |
| PCP008163 | 8,517000043 | 8,803065551 | 9,131856961 | 9,582461918 | PCP008163 | XM_009353105 |
| PCP008186 | 9,359024737 | 9,225617167 | 9,097163045 | 9,364856916 |           |              |
| PCP008209 | 9,533972085 | 9,315896762 | 9,647458426 | 9,692911856 | PCP008209 | XM_009338484 |
| PCP008262 | 9,654636029 | 10,00562455 | 10,17492568 | 11,41503926 |           |              |
| PCP008269 | 9,468277836 | 9,891282469 | 9,814854798 | 9,375756255 | PCP008269 | XM_009363972 |
| PCP008298 | 11,9854862  | 11,98144955 | 12,00199571 | 11,39981196 | PCP008298 | XM_017336967 |
| PCP008327 | 10,38478375 | 10,68035952 | 10,86005493 | 10,80654962 | PCP008327 | XM_008391641 |
| PCP008339 | 9,697541014 | 9,863675229 | 9,63481105  | 9,571752644 |           |              |
| PCP008341 | 10,10852446 | 10,1476247  | 10,37576711 | 10,77093639 | PCP008341 | XM_018644469 |
| PCP008351 | 8,97441459  | 9,19640541  | 9,421370591 | 9,795503976 |           |              |
| PCP008365 | 11,15713847 | 11,4807902  | 11,49951208 | 11,38118061 | PCP008365 | XM_009356600 |
| PCP008367 | 9,889245365 | 9,520952554 | 9,422064766 | 9,55522181  |           |              |
| PCP008387 | 8,929761415 | 9,148044344 | 9,382256552 | 9,566054038 |           |              |
| PCP008388 | 8,952246191 | 9,121533517 | 9,347244868 | 9,720534991 |           |              |
| PCP008407 | 9,093628836 | 9,117201525 | 9,307587905 | 10,02928723 | PCP008407 | XM_009335859 |
| PCP008418 | 12,16312445 | 11,84862294 | 11,60625251 | 11,62631593 | PCP008418 | XM_009335836 |
| PCP008419 | 11,41433112 | 11,71853288 | 11,83486604 | 11,12649154 | PCP008419 | XM_009335835 |
| PCP008427 | 8,77807713  | 8,705044823 | 8,709669735 | 9,167418146 | PCP008427 | XM_009335818 |
| PCP008430 | 9,584342459 | 9,627533884 | 9,52028473  | 9,652253436 | PCP008430 | XM_009335813 |
| PCP008442 | 9,359024737 | 9,342074668 | 9,544326957 | 9,814854798 |           |              |
| PCP008444 | 9,396604781 | 9,589332801 | 9,682994584 | 10,43288635 | PCP008444 | XM_009368900 |
| PCP008445 | 9,4743752   | 9,693486957 | 9,756005825 | 10,29270124 | PCP008445 | XM_009368895 |
| PCP008446 | 9,816455711 | 9,919861451 | 9,975375111 | 10,49485558 | PCP008446 | XM_008352737 |
| PCP008463 | 9,142107057 | 9,146365017 | 9,274564521 | 9,095397023 | PCP008463 | XM_008345008 |
| PCP008469 | 9,841831634 | 9,857980995 | 9,869331651 | 10,23401505 | PCP008469 | XM_008388140 |
| PCP008471 | 10,86882255 | 10,8963324  | 10,75098327 | 10,71910642 |           |              |
| PCP008478 | 9,752096261 | 9,689997971 | 9,878050913 | 10,11547288 | PCP008478 | XM_009336880 |
| PCP008497 | 13,45549804 | 13,04239981 | 12,91849059 | 13,24545318 | PCP008497 | XR_531926    |
| PCP008500 | 10,10895563 | 10,19023211 | 10,18198458 | 10,12498719 | PCP008500 | XM_009354827 |
| PCP008509 | 9,230428801 | 9,593708574 | 9,405141463 | 9,487176804 | PCP008509 | XM_008361698 |
| PCP008520 | 11,09341756 | 11,05596023 | 11,08236862 | 10,98299357 | PCP008520 | XM_009348551 |
| PCP008526 | 9,449148645 | 9,435316054 | 9,621447519 | 9,545601627 | PCP008526 | XM_017326472 |
| PCP008545 | 8,821231873 | 8,90288758  | 8,930737338 | 8,850718177 | PCP008545 | XM_018643209 |
| PCP008554 | 11,01541505 | 10,86495992 | 10,90989308 | 10,68650053 | PCP008554 | XM_009339387 |
| PCP008555 | 8,87857209  | 8,649866903 | 8,979196518 | 9,093628836 |           |              |
| PCP008557 | 10,55586408 | 10,51503944 | 10,46283965 | 10,13400269 | PCP008557 | XR_664628    |
| PCP008561 | 9,819652219 | 9,215120395 | 9,772595002 | 10,02513956 |           |              |
| PCP008585 | 10,47978026 | 10,40868002 | 10,36084708 | 10,675666   | PCP008585 | XM_009360984 |
| PCP008586 | 9,08833774  | 9,297672907 | 9,824958741 | 10,41996018 | PCP008586 | XR_667585    |
| PCP008598 | 9,815383296 | 9,648663167 | 9,749869427 | 9,727920455 | PCP008598 | XM_009368121 |
| PCP008612 | 10,67801027 | 10,73273557 | 10,9945868  | 10,86083092 | PCP008612 | XM_009358964 |
| PCP008618 | 8,659389441 | 8,861086906 | 8,927777962 | 9,513727596 | PCP008618 | XM_009344741 |
| PCP008658 | 8,899870461 | 8,95419631  | 9,08127038  | 9,413627929 | PCP008658 | XM_008376727 |

|           |             |             |             |             |           |              |
|-----------|-------------|-------------|-------------|-------------|-----------|--------------|
| PCP008660 | 10,27029533 | 10,42486961 | 10,52649924 | 10,8262863  |           |              |
| PCP008689 | 9,569229039 | 9,765418716 | 9,928770029 | 10,17700835 | PCP008689 | XM_008350869 |
| PCP008691 | 10,74230944 | 11,00889777 | 10,95564991 | 11,2636624  | PCP008691 | XR_529409    |
| PCP008693 | 8,826548487 | 8,813781191 | 9,144658243 | 9,356826076 |           |              |
| PCP008723 | 10,6694786  | 10,64985792 | 10,49818105 | 10,6794801  | PCP008723 | XM_009363642 |
| PCP008724 | 11,10721708 | 11,37250053 | 11,14784089 | 11,49502054 | PCP008724 | XM_018648642 |
| PCP008771 | 9,687673116 | 9,605479518 | 9,692911856 | 10,12282799 | PCP008771 | XM_009357649 |
| PCP008797 | 9,14974712  | 9           | 9,208648936 | 10,19229281 | PCP008797 | XM_009338219 |
| PCP008799 | 9,79387963  | 10,27068077 | 10,01495499 | 10,25148241 |           |              |
| PCP008809 | 12,52307183 | 12,72245108 | 12,73781138 | 13,06944977 |           |              |
| PCP008814 | 9,273026268 | 9,304533858 | 9,361943774 | 9,716527978 | PCP008814 | XM_009361027 |
| PCP008822 | 9,082149041 | 9,051671182 | 9,00750388  | 8,744833837 |           |              |
| PCP008824 | 11,54592977 | 11,3779317  | 11,58072965 | 11,85005788 |           |              |
| PCP008827 | 9,878050913 | 9,690574236 | 9,705632387 | 9,658211483 | PCP008827 | XM_018648356 |
| PCP008832 | 9,442259297 | 9,553955615 | 9,569229039 | 9,880088564 |           |              |
| PCP008837 | 10,49485558 | 10,38046107 | 10,43671154 | 10,48449062 | PCP008837 | XM_008369969 |
| PCP008855 | 9,70333261  | 9,846540327 | 9,820178962 | 9,84757418  | PCP008855 | XM_017333417 |
| PCP008880 | 9,775330438 | 9,77478706  | 10,06339508 | 10,33650656 |           |              |
| PCP008903 | 11,5849625  | 11,56890615 | 11,68854319 | 11,51733968 | PCP008903 | XM_008368496 |
| PCP008924 | 10,33203655 | 10,54754044 | 10,63390341 | 10,45909345 |           |              |
| PCP008925 | 11,10307139 | 11,3192939  | 11,37159698 | 11,2879028  | PCP008925 | XM_009357300 |
| PCP008929 | 12,19865069 | 12,39169201 | 12,40585146 | 12,81097322 |           |              |
| PCP008932 | 8,787902559 | 8,887738491 | 8,919846558 | 9,324923085 | PCP008932 | XM_008343798 |
| PCP008934 | 8,996247498 | 8,849655303 | 9,034331283 | 9,484480553 | PCP008934 | XM_008343794 |
| PCP008953 | 9,014941046 | 8,730198386 | 8,949330653 | 8,825499451 | PCP008953 | XM_009346689 |
| PCP008964 | 11,95080009 | 11,5849625  | 11,61240779 | 11,51191569 | PCP008964 | XM_018644326 |
| PCP008987 | 10,46590306 | 10,11243951 | 10,19844504 | 10,4076183  | PCP008987 | XM_009361162 |
| PCP008993 | 9,967701794 | 10,19023211 | 10,28308835 | 11,33389887 | PCP008993 | XM_009361158 |
| PCP009003 | 9,944463173 | 10,30035256 | 10,43671154 | 10,93565864 | PCP009003 | XM_009345767 |
| PCP009020 | 9,615942233 | 9,585582276 | 9,563520437 | 9,553302899 |           |              |
| PCP009028 | 9,785174528 | 10,01495499 | 9,991521846 | 9,964817355 |           |              |
| PCP009037 | 9,38945926  | 9,240004193 | 9,422064766 | 9,997179481 | PCP009037 | XM_009375743 |
| PCP009082 | 8,942514505 | 9,085684897 | 9,093628836 | 9,442259297 | PCP009082 | XM_008378839 |
| PCP009104 | 10,37612539 | 10,25068924 | 10,43983088 | 10,33016621 | PCP009104 | XM_009365977 |
| PCP009135 | 10,08170978 | 9,992938336 | 10,12325492 | 10,37756845 | PCP009135 | XM_009343510 |
| PCP009155 | 10,74090227 | 10,70793713 | 10,77313921 | 11,84326549 | PCP009155 | XM_009346208 |
| PCP009170 | 9,730181399 | 9,286950435 | 9,872936465 | 9,631777296 | PCP009170 | XM_009378021 |
| PCP009173 | 10,24555271 | 10,26717293 | 10,34651373 | 10,63269536 |           |              |
| PCP009196 | 9,743706817 | 9,637838439 | 9,640841416 | 9,711374448 |           |              |
| PCP009202 | 9,632995197 | 9,646864677 | 9,535916864 | 9,866768918 | PCP009202 | XM_008378897 |
| PCP009225 | 11,64385619 | 11,51208365 | 11,65150022 | 11,90438249 | PCP009225 | XM_008387923 |
| PCP009258 | 9,701011827 | 9,497851837 | 9,606090543 | 9,62935662  | PCP009258 | XM_009340087 |
| PCP009259 | 8,868297843 | 8,843387202 | 9,014941046 | 9,480446902 |           |              |
| PCP009274 | 9,721099189 | 9,480446902 | 9,631777296 | 9,599299194 |           |              |
| PCP009283 | 8,842350343 | 8,929761415 | 9,006550496 | 9,503825738 |           |              |
| PCP009286 | 9,024225474 | 8,893817229 | 9,353146825 | 9,106772296 | PCP009286 | XM_009351984 |

|           |             |             |             |             |           |              |
|-----------|-------------|-------------|-------------|-------------|-----------|--------------|
| PCP009305 | 9,156512913 | 9,213517401 | 9,29156212  | 9,18157469  | PCP009305 | XM_009380834 |
| PCP009349 | 9,354624059 | 9,47370575  | 9,251884747 | 8,724513853 | PCP009349 | XM_009356382 |
| PCP009388 | 8,98205238  | 9,345028167 | 9,301496195 | 9,892284763 |           |              |
| PCP009415 | 9,50118036  | 9,476401941 | 9,353146825 | 9,719388821 |           |              |
| PCP009440 | 9,709652505 | 10,0588982  | 10,07324452 | 10,53398182 | PCP009440 | XM_009352267 |
| PCP009477 | 8,752648252 | 9,160703421 | 9,312882955 | 9,876516947 | PCP009477 | XM_008349805 |
| PCP009490 | 11,14847658 | 11,02583167 | 11,16050175 | 11,49951208 |           |              |
| PCP009557 | 9,372146798 | 9,326429487 | 9,696967526 | 11,65269711 | PCP009557 | XM_008392473 |
| PCP009572 | 11,31250295 | 11,24693651 | 11,26131337 | 11,19167615 | PCP009572 | XM_009341313 |
| PCP009577 | 11,27573459 | 11,15312765 | 11,1243346  | 11,09781487 |           |              |
| PCP009586 | 10,02004932 | 9,99859043  | 10,08391805 | 9,957102042 | PCP009586 | XM_009355812 |
| PCP009611 | 9,132705355 | 9,407267764 | 9,350209917 | 10,10852446 | PCP009611 | XM_009341766 |
| PCP009695 | 9,413627929 | 9,477758266 | 9,517019734 | 9,917864332 | PCP009695 | XM_018647494 |
| PCP009714 | 10,31967212 | 9,662970945 | 9,444331629 | 9,606719814 | PCP009714 | XM_009358472 |
| PCP009723 | 8,686500527 | 8,835008208 | 8,936637939 | 9,348728154 |           |              |
| PCP009731 | 9,730181399 | 9,790625442 | 9,906890596 | 10,1670041  | PCP009731 | XM_009358725 |
| PCP009734 | 8,743723645 | 8,745943176 | 9,189009107 | 9,299208018 | PCP009734 | XM_009358775 |
| PCP009753 | 9,232828614 | 9,578693464 | 9,744278848 | 9,842350343 | PCP009753 | XM_009358994 |
| PCP009768 | 10,1050311  | 10,31288296 | 10,38154295 | 10,80332392 | PCP009768 | XM_009359139 |
| PCP009774 | 8,72904287  | 8,68183575  | 9,240004193 | 9,726218159 |           |              |
| PCP009780 | 10,99270471 | 11,06474276 | 11,15692367 | 11,63057202 |           |              |
| PCP009783 | 9,685922633 | 9,938594555 | 10,01634867 | 10,1438041  | PCP009783 | XM_009359318 |
| PCP009791 | 11,51455133 | 11,26170122 | 11,02744299 | 10,8494051  | PCP009791 | XM_009359401 |
| PCP009806 | 8,517000043 | 8,636624621 | 9,192292814 | 9,595574522 | PCP009806 | XM_009349275 |
| PCP009825 | 9,90287251  | 9,993405473 | 10,03479896 | 10,02697983 | PCP009825 | XM_009346261 |
| PCP009830 | 9,882138629 | 9,874474241 | 9,930737338 | 9,903384798 | PCP009830 | XM_018644781 |
| PCP009840 | 14,48228298 | 14,34948858 | 14,32166954 | 14,65228481 |           |              |
| PCP009848 | 10,52388535 | 9,453270634 | 10,01634867 | 9,594940371 | PCP009848 | XM_009343287 |
| PCP009851 | 9,620824641 | 9,626311362 | 9,8159116   | 9,747639151 |           |              |
| PCP009862 | 9,350209917 | 9,479113318 | 9,651051691 | 10,04667385 | PCP009862 | XM_009341453 |
| PCP009869 | 9,796039609 | 9,783538504 | 9,993886607 | 10,67683861 |           |              |
| PCP009881 | 9,332417038 | 9,356826076 | 9,380828997 | 9,268354853 |           |              |
| PCP009899 | 10,2179577  | 10,21391832 | 10,41890673 | 10,87523483 |           |              |
| PCP009904 | 9,744833837 | 9,510427928 | 9,630576566 | 9,609788199 |           |              |
| PCP009916 | 9,036173613 | 9,223205318 | 9,147204925 | 9,536577492 |           |              |
| PCP009926 | 10,75822321 | 10,70936819 | 10,94227257 | 11,25365251 |           |              |
| PCP009933 | 9,564778269 | 9,574271841 | 9,557789157 | 9,369968059 |           |              |
| PCP009934 | 10,69435789 | 10,42206477 | 10,67065625 | 10,55810497 | PCP009934 | XM_009371782 |
| PCP009935 | 13,00369358 | 12,83302249 | 13,13837901 | 13,42381581 | PCP009935 | XM_009372281 |
| PCP009938 | 9,703903573 | 9,176597042 | 9,246336825 | 8,67479253  | PCP009938 | XR_664329    |
| PCP009942 | 10,64475759 | 10,72934033 | 10,87446656 | 11,16259903 | PCP009942 | XM_009372264 |
| PCP009957 | 10,70505347 | 11,17659081 | 11,75502525 | 12,49193575 | PCP009957 | XR_001790491 |
| PCP009972 | 9,696967526 | 9,614709844 | 9,601157931 | 9,382991408 | PCP009972 | XM_017333450 |
| PCP009976 | 9,387306529 | 9,655834793 | 9,751544059 | 10,16951167 | PCP009976 | XR_670079    |
| PCP009992 | 8,781359714 | 8,788979283 | 8,952246191 | 9,60856902  |           |              |
| PCP010017 | 8,888743249 | 8,703903573 | 8,931712601 | 9,319672121 | PCP010017 | XM_009364996 |

|           |             |             |             |             |           |              |
|-----------|-------------|-------------|-------------|-------------|-----------|--------------|
| PCP010026 | 8,568602197 | 8,73809226  | 8,76927586  | 9,60856902  |           |              |
| PCP010032 | 14,31743593 | 14,12096682 | 14,24916309 | 14,27736006 | PCP010032 | XM_009365012 |
| PCP010045 | 9,54303182  | 9,666525827 | 9,691167722 | 10,1050311  |           |              |
| PCP010048 | 11,26561505 | 11,0609188  | 11,2137118  | 11,58511747 | PCP010048 | XM_008376508 |
| PCP010053 | 12,60184738 | 13,11406765 | 12,95110255 | 13,53729971 | PCP010053 | NM_001302280 |
| PCP010062 | 13,38113734 | 13,31788317 | 13,47598669 | 13,80318969 | PCP010062 | XM_009364511 |
| PCP010072 | 9,392317423 | 8,8008999   | 9,098900598 | 8,827596761 | PCP010072 | XM_009364498 |
| PCP010075 | 9,327170869 | 8,736976865 | 8,775873612 | 8,795487741 | PCP010075 | XM_008364881 |
| PCP010104 | 9,002815016 | 8,790087794 | 9,094526396 | 9,217545787 |           |              |
| PCP010106 | 9,621447519 | 9,477758266 | 9,569229039 | 9,945443836 | PCP010106 | XM_009357457 |
| PCP010111 | 9,407968756 | 8,860062694 | 9,321184013 | 9,366322214 | PCP010111 | XM_009357468 |
| PCP010112 | 11,54448152 | 11,41398221 | 11,34207467 | 11,09890718 | PCP010112 | XM_009357471 |
| PCP010119 | 8,98205238  | 8,788979283 | 8,835008208 | 8,903881846 | PCP010119 | XM_009357480 |
| PCP010122 | 10,01726776 | 9,730181399 | 9,785174528 | 9,855911856 | PCP010122 | XM_018647362 |
| PCP010123 | 9,447765141 | 9,119797095 | 9,388727692 | 9,548821908 |           |              |
| PCP010130 | 10,83130724 | 10,53267735 | 11,07547915 | 11,21533278 | PCP010130 | XM_018645143 |
| PCP010141 | 8,951284715 | 8,937609223 | 9,186535222 | 9,459431619 | PCP010141 | XM_009377347 |
| PCP010154 | 11,25108588 | 11,44931891 | 11,88988417 | 12,59502432 | PCP010154 | XM_008358773 |
| PCP010163 | 9,884170519 | 9,880088564 | 9,888743249 | 10,32904509 | PCP010163 | XM_018651406 |
| PCP010181 | 9,499188155 | 9,468277836 | 9,524208672 | 9,479113318 | PCP010181 | XM_018651401 |
| PCP010198 | 11,66637048 | 11,47116713 | 11,55810019 | 11,36996261 |           |              |
| PCP010201 | 9,201315296 | 9,011227255 | 9,182394353 | 9,090985714 | PCP010201 | XM_009374117 |
| PCP010207 | 8,731319031 | 8,820178962 | 9,01402047  | 9,256609709 |           |              |
| PCP010214 | 10,57962707 | 10,42870562 | 10,4015942  | 10,09407769 | PCP010214 | XR_001954170 |
| PCP010223 | 10,2387988  | 10,24237623 | 10,26717293 | 10,59121377 | PCP010223 | XM_009373519 |
| PCP010229 | 10,03617361 | 10,41890673 | 10,52519778 | 10,37250597 | PCP010229 | XM_017331298 |
| PCP010235 | 11,74076316 | 11,74202727 | 11,83328544 | 11,82004729 |           |              |
| PCP010246 | 9,752664976 | 9,68707819  | 9,897346324 | 10,09978174 |           |              |
| PCP010249 | 10,41080112 | 10,32830467 | 10,31741261 | 10,35019886 | PCP010249 | XM_009376153 |
| PCP010262 | 10,18031945 | 10,14507876 | 10,24039782 | 10,70102049 | PCP010262 | XM_009376124 |
| PCP010264 | 10,15101654 | 9,754336368 | 9,689421477 | 8,925791779 | PCP010264 | XM_009376132 |
| PCP010294 | 10,25817734 | 10,15945511 | 10,17825402 | 10,05256805 |           |              |
| PCP010307 | 9,722244002 | 9,742023058 | 9,675957033 | 10,25266543 | PCP010307 | XM_009356185 |
| PCP010322 | 9,996713565 | 10,39732167 | 10,34355217 | 11,41292439 | PCP010322 | XM_009376403 |
| PCP010327 | 10,07592031 | 10,15355203 | 10,11547288 | 10,45704223 | PCP010327 | XM_009376398 |
| PCP010336 | 9,275356315 | 9,033423002 | 9,318926875 | 9,640244936 | PCP010336 | XM_009351812 |
| PCP010352 | 10,54561128 | 10,55394602 | 10,57270023 | 11,07503116 | PCP010352 | XM_009371419 |
| PCP010355 | 10,9398216  | 10,92901424 | 10,99576715 | 10,88289519 |           |              |
| PCP010361 | 8,796591265 | 9,00750388  | 9,147204925 | 8,946409212 |           |              |
| PCP010389 | 9,628755372 | 9,934678666 | 10,31514956 | 10,87267488 | PCP010389 | XM_009357045 |
| PCP010401 | 9,559702114 | 9,889245365 | 9,772595002 | 10,27961058 |           |              |
| PCP010440 | 10,43045255 | 10,64745843 | 10,68445935 | 10,99010396 | PCP010440 | XM_008378913 |
| PCP010445 | 9,489185654 | 8,903881846 | 9,356077767 | 9,318158642 | PCP010445 | XM_008378915 |
| PCP010454 | 9,224797591 | 8,899870461 | 9,157346935 | 9,626931876 | PCP010454 | XM_008378919 |
| PCP010455 | 10,61010206 | 9,789533645 | 9,316666199 | 8,336863563 | PCP010455 | XM_008389727 |
| PCP010491 | 10,47201045 | 10,65939836 | 10,76901132 | 10,85927853 |           |              |

|           |             |             |             |             |           |              |
|-----------|-------------|-------------|-------------|-------------|-----------|--------------|
| PCP010499 | 8,713111526 | 8,782441329 | 9,130132926 | 9,374322251 |           |              |
| PCP010518 | 10,39767463 | 10,30720081 | 10,18198458 | 9,501837185 | PCP010518 | XM_009354312 |
| PCP010520 | 13,75766815 | 12,65702139 | 12,50787638 | 12,73928908 | PCP010520 | XM_009341200 |
| PCP010537 | 10,68970975 | 10,65582585 | 10,76570049 | 10,59525748 | PCP010537 | XM_008374730 |
| PCP010539 | 9,625708843 | 9,19063955  | 8,751544059 | 9,340584522 |           |              |
| PCP010553 | 10,22319325 | 9,525520809 | 10,34132979 | 10,26405548 | PCP010553 | XM_009378648 |
| PCP010554 | 10,16197583 | 10,06160071 | 10,09364204 | 9,88519302  | PCP010554 | XM_009378639 |
| PCP010557 | 8,518338423 | 8,574896225 | 8,945443836 | 9,300741498 | PCP010557 | XM_009358699 |
| PCP010561 | 9,376494429 | 9,306813609 | 9,195569065 | 8,830768706 | PCP010561 | XM_009358693 |
| PCP010565 | 9,239192751 | 8,552015799 | 8,485145023 | 10,42731284 | PCP010565 | XM_009361563 |
| PCP010568 | 12,75021917 | 12,57175264 | 12,69566633 | 13,03451184 | PCP010568 | XM_009361561 |
| PCP010570 | 9,412929682 | 9,5980525   | 9,895832748 | 10,53818893 | PCP010570 | XM_009361558 |
| PCP010573 | 9,768184325 | 9,69406183  | 9,84757418  | 10,16323454 | PCP010573 | XM_009361551 |
| PCP010588 | 8,999069838 | 9,017727086 | 8,890781061 | 8,787902559 | PCP010588 | XM_009340015 |
| PCP010594 | 12,91257689 | 12,75196241 | 12,8726114  | 13,24208292 | PCP010594 | XM_009359969 |
| PCP010603 | 10,6744836  | 10,68064962 | 10,68123841 | 10,67213359 | PCP010603 | XM_008383375 |
| PCP010607 | 10,29309224 | 10,39588754 | 10,49452562 | 10,437055   | PCP010607 | XM_008362977 |
| PCP010620 | 9,208648936 | 9,176597042 | 9,221587121 | 9,142949447 | PCP010620 | XM_018650439 |
| PCP010633 | 9,082149041 | 9,003742767 | 9,152284842 | 9,44362737  | PCP010633 | XM_009359938 |
| PCP010640 | 8,948367232 | 9,309089764 | 9,173252384 | 9,266786541 | PCP010640 | XM_009365016 |
| PCP010646 | 9,278449458 | 9,285402219 | 9,315896762 | 9,692911856 |           |              |
| PCP010647 | 9,566681988 | 9,475733431 | 9,505156537 | 9,374322251 |           |              |
| PCP010655 | 10,38046107 | 10,20539007 | 10,35424938 | 10,24990749 | PCP010655 | XM_008356805 |
| PCP010690 | 10,00842862 | 9,72395099  | 9,557138173 | 8,907882108 | PCP010690 | XM_009380995 |
| PCP010694 | 9,669469742 | 9,526831754 | 9,571126898 | 9,140395236 | PCP010694 | XM_017322967 |
| PCP010702 | 10,05483491 | 9,975375111 | 10,09319305 | 10,37612539 | PCP010702 | XR_001951751 |
| PCP010718 | 8,868297843 | 8,822315887 | 9,010304306 | 9,8339495   | PCP010718 | XM_009347492 |
| PCP010728 | 9,779177627 | 9,733015322 | 9,930737338 | 9,872413248 |           |              |
| PCP010736 | 9,776433032 | 9,8008999   | 9,781359714 | 9,654045226 | PCP010736 | XM_009378201 |
| PCP010773 | 10,42661071 | 10,28617653 | 10,36449583 | 10,13228122 | PCP010773 | XM_018645865 |
| PCP010800 | 8,247927513 | 8,781359714 | 9,50249371  | 9,842868866 |           |              |
| PCP010829 | 9,350209917 | 9,693486957 | 9,73809226  | 9,963864223 | PCP010829 | XM_018645484 |
| PCP010846 | 9,184057088 | 9,315896762 | 9,087462841 | 8,806291831 | PCP010846 | XM_009339261 |
| PCP010864 | 11,35920049 | 11,28886607 | 11,29462075 | 11,35277728 | PCP010864 | XM_009351048 |
| PCP010869 | 10,03112222 | 10,10022868 | 10,28308835 | 10,77616158 | PCP010869 | XM_008341640 |
| PCP010874 | 8,783554874 | 8,80196697  | 8,807354922 | 9,187352073 |           |              |
| PCP010879 | 10,97393409 | 10,90288004 | 11,02698675 | 11,38711801 | PCP010879 | XM_008346333 |
| PCP010886 | 10,15355203 | 10,14040802 | 9,8159116   | 9,916372141 | PCP010886 | XM_009345141 |
| PCP010900 | 7,602364826 | 8,700439718 | 9,846540327 | 10,40939094 | PCP010900 | XM_009348130 |
| PCP010907 | 9,917864332 | 10,11591499 | 10,3786525  | 10,86521517 | PCP010907 | XM_004302135 |
| PCP010922 | 8,78571401  | 8,916864735 | 9,161560218 | 9,438105682 | PCP010922 | XM_009352223 |
| PCP010925 | 9,505156537 | 9,575539247 | 9,794415866 | 10,00235092 | PCP010925 | XM_009340712 |
| PCP010926 | 9,224797591 | 9,262870027 | 9,326429487 | 9,842350343 | PCP010926 | XM_009340714 |
| PCP010944 | 10,59183086 | 10,59276535 | 10,70793713 | 10,64175373 | PCP010944 | XM_018643563 |
| PCP010950 | 8,809510912 | 9,022367813 | 9,10938668  | 8,890781061 | PCP010950 | XM_009349581 |
| PCP010955 | 8,649866903 | 9,795503976 | 10,59835962 | 9,863148641 | PCP010955 | XM_009344090 |

|           |             |             |             |             |           |              |
|-----------|-------------|-------------|-------------|-------------|-----------|--------------|
| PCP010964 | 10,22118833 | 10,04757383 | 10,21391832 | 11,01518504 | PCP010964 | XM_009344697 |
| PCP010992 | 9,826024064 | 9,979182225 | 10,0274499  | 9,896332404 | PCP010992 | XM_009368277 |
| PCP010997 | 9,712527    | 9,621447519 | 9,792790294 | 10,07503785 | PCP010997 | XM_009378729 |
| PCP010998 | 10,21228966 | 10,09143539 | 10,52779952 | 11,14402087 | PCP010998 | XM_009378713 |
| PCP010999 | 10,14465824 | 10,14974712 | 10,21714588 | 10,65165269 | PCP010999 | XM_009378690 |
| PCP011023 | 9,449829585 | 9,688250309 | 9,955170382 | 10,03754695 |           |              |
| PCP011054 | 9,356077767 | 9,415741768 | 9,043492153 | 9,078604498 | PCP011054 | XM_018651149 |
| PCP011155 | 8,741466986 | 9,402308618 | 9,883147293 | 10,58527242 | PCP011155 | XM_009369313 |
| PCP011348 | 9,754887502 | 9,988216019 | 10,01168851 | 10,10328781 | PCP011348 | XM_009370567 |
| PCP011351 | 9,327934318 | 9,222384371 | 9,357552005 | 10,30301583 |           |              |
| PCP011354 | 9,130132926 | 9,078604498 | 9,22881869  | 9,642051693 |           |              |
| PCP011355 | 8,928755227 | 8,999069838 | 9,1807297   | 9,6794801   | PCP011355 | XM_018650136 |
| PCP011376 | 8,79983204  | 8,687655621 | 8,745943176 | 9,108524457 | PCP011376 | XM_008363009 |
| PCP011427 | 11,66991701 | 11,68766874 | 11,88747577 | 11,81578354 | PCP011427 | XM_009368210 |
| PCP011432 | 9,900866808 | 9,682994584 | 9,830784548 | 9,852264198 | PCP011432 | XM_009368201 |
| PCP011441 | 9,520952554 | 9,6794801   | 9,670656249 | 9,92135004  | PCP011441 | XM_018649648 |
| PCP011453 | 10,72451385 | 10,72649918 | 10,87728413 | 11,16595589 | PCP011453 | XM_009355236 |
| PCP011457 | 10,68766437 | 10,68533575 | 10,75014588 | 10,66681871 | PCP011457 | XM_009355230 |
| PCP011464 | 9,436711542 | 9,359024737 | 9,41715631  | 9,971543554 | PCP011464 | XM_009341250 |
| PCP011482 | 10,92703717 | 10,60517391 | 10,74819285 | 11,07458973 | PCP011482 | XM_009355202 |
| PCP011491 | 9,37721053  | 8,639051236 | 8,759322309 | 8,648645193 | PCP011491 | XM_009355179 |
| PCP011495 | 9,626931876 | 9,422758607 | 9,241578042 | 9,460803985 | PCP011495 | XR_665238    |
| PCP011497 | 10,38658465 | 10,29001885 | 10,41644921 | 10,33203655 | PCP011497 | XM_018644223 |
| PCP011498 | 9,564778269 | 9,606719814 | 9,750991645 | 10,01216358 |           |              |
| PCP011520 | 11,15587443 | 11,17013162 | 11,12520034 | 10,97799537 | PCP011520 | XM_018650376 |
| PCP011541 | 10,25345751 | 10,31212284 | 10,47302584 | 10,79711839 |           |              |
| PCP011555 | 9,985372344 | 10,21593336 | 9,171602161 | 8,849655303 | PCP011555 | XM_008355283 |
| PCP011562 | 11,19926131 | 11,14911199 | 11,34466763 | 11,5370582  | PCP011562 | XM_008381243 |
| PCP011569 | 10,15734694 | 10,27961058 | 10,72366094 | 10,3376219  |           |              |
| PCP011577 | 9,380093039 | 9,516350087 | 9,695228291 | 9,991054099 | PCP011577 | XM_009380033 |
| PCP011582 | 9,925302224 | 10,39802751 | 10,19311874 | 10,35608877 | PCP011582 | XM_009380038 |
| PCP011586 | 10,24237623 | 9,99859043  | 10,17700835 | 10,39196315 | PCP011586 | XM_009380043 |
| PCP011593 | 10,19023211 | 9,616548844 | 9,889245365 | 9,306813609 | PCP011593 | XM_009380052 |
| PCP011602 | 9,850186838 | 9,889762515 | 9,92381771  | 9,761002638 | PCP011602 | XM_018650184 |
| PCP011614 | 8,884689491 | 9,045295522 | 9,162391329 | 9,361220052 |           |              |
| PCP011643 | 9,932214752 | 9,517669388 | 9,533329732 | 9,919354981 | PCP011643 | XM_008341786 |
| PCP011658 | 11,48549224 | 11,61117699 | 11,88557055 | 12,49352275 | PCP011658 | XM_008235525 |
| PCP011669 | 12,68109124 | 12,72380384 | 12,47784173 | 12,62586178 | PCP011669 | XM_009342585 |
| PCP011687 | 10,35314683 | 10,1050311  | 10,35681507 | 10,71338651 | PCP011687 | XM_018647245 |
| PCP011688 | 9,404439095 | 9,299963518 | 9,382256552 | 9,373582965 | PCP011688 | XM_008365865 |
| PCP011708 | 10,40123153 | 10,84025078 | 10,71681946 | 10,98631849 |           |              |
| PCP011720 | 10,43184231 | 10,39196315 | 10,52290515 | 10,87190524 | PCP011720 | XM_008353703 |
| PCP011722 | 10,31816994 | 10,34207467 | 10,41503398 | 11,06429143 |           |              |
| PCP011731 | 9,686500527 | 9,900368721 | 10,1711768  | 10,30985147 |           |              |
| PCP011760 | 9,688250309 | 9,147204925 | 8,947403166 | 8,321928095 | PCP011760 | XM_009350263 |
| PCP011772 | 10,02052165 | 9,946906274 | 10,08524671 | 10,46522967 | PCP011772 | XM_018643271 |

|           |             |             |             |             |           |              |
|-----------|-------------|-------------|-------------|-------------|-----------|--------------|
| PCP011774 | 12,06933899 | 11,81204491 | 11,80829253 | 12,14136318 |           |              |
| PCP011789 | 11,11482899 | 10,98820892 | 11,08547246 | 11,36850646 |           |              |
| PCP011829 | 12,62060245 | 12,73428623 | 12,62472008 | 13,01883826 | PCP011829 | XM_008343259 |
| PCP011836 | 9,908887946 | 9,580578921 | 9,610415859 | 9,736959959 | PCP011836 | XM_009380193 |
| PCP011843 | 8,833933692 | 8,833933692 | 9,255807556 | 9,599912842 | PCP011843 | XM_018650019 |
| PCP011844 | 8,776992236 | 8,899870461 | 9,306813609 | 9,779719355 | PCP011844 | XM_009370095 |
| PCP011856 | 10,29194193 | 10,14296221 | 10,27224486 | 10,17658458 |           |              |
| PCP011865 | 8,963849777 | 8,853839746 | 8,876516947 | 8,733591606 | PCP011865 | XM_008360466 |
| PCP011875 | 10,22118833 | 10,18239435 | 10,47573343 | 10,57175264 | PCP011875 | XM_009344381 |
| PCP011907 | 8,383704292 | 8,936637939 | 9,171602161 | 10,12498719 | PCP011907 | XM_009338906 |
| PCP011910 | 10,23082505 | 10,17783061 | 10,34836301 | 10,82708066 | PCP011910 | XM_009347671 |
| PCP011926 | 9,622655867 | 9,569229039 | 9,304533858 | 9,14974712  | PCP011926 | XM_009347911 |
| PCP011954 | 8,61717357  | 8,795487741 | 9,260519709 | 9,568583198 | PCP011954 | XR_001953335 |
| PCP011960 | 9,925302224 | 9,970580478 | 10,06877828 | 10,42731284 | PCP011960 | XM_008374653 |
| PCP011965 | 9,327170869 | 9,544964433 | 9,6794801   | 9,648663167 | PCP011965 | XM_009348355 |
| PCP011996 | 13,3568192  | 13,53462753 | 13,25699441 | 13,62544288 | PCP011996 | XM_008363560 |
| PCP012003 | 9,879077758 | 10,13356609 | 10,02606691 | 10,1309952  | PCP012003 | XM_009359881 |
| PCP012015 | 10,04165915 | 10,14974712 | 10,16741815 | 10,16071602 | PCP012015 | XM_009351619 |
| PCP012016 | 9,536577492 | 9,797661526 | 9,851233701 | 10,14932797 |           |              |
| PCP012023 | 9,343563277 | 9,30986284  | 9,292321633 | 9,090985714 | PCP012023 | XM_009336154 |
| PCP012037 | 9,364856916 | 8,9905862   | 8,82336724  | 9,503169818 | PCP012037 | XM_009358036 |
| PCP012039 | 10,03296865 | 9,643260955 | 9,350939182 | 9,312882955 | PCP012039 | XM_009357980 |
| PCP012050 | 8,920858975 | 9,103287808 | 9,262094845 | 9,450530824 | PCP012050 | XM_009369208 |
| PCP012051 | 11,03020501 | 10,6891244  | 11,09187831 | 11,67537049 | PCP012051 | XM_018649862 |
| PCP012059 | 9,419264989 | 9,589332801 | 9,738649634 | 9,937623934 | PCP012059 | XM_009369386 |
| PCP012068 | 12,61501574 | 12,79894358 | 12,25463597 | 12,01518155 |           |              |
| PCP012077 | 9,235224441 | 9,37721053  | 9,388017285 | 9,759888183 |           |              |
| PCP012102 | 10,50878516 | 10,4033636  | 10,53365094 | 10,42381975 |           |              |
| PCP012127 | 10,84313591 | 10,84077792 | 10,91761823 | 11,32455749 | PCP012127 | XM_009342245 |
| PCP012145 | 10,63026713 | 10,44086917 | 10,55937709 | 10,56510208 | PCP012145 | XM_009371293 |
| PCP012146 | 9,957580925 | 9,75710661  | 9,750991645 | 10,203348   | PCP012146 | XM_008386527 |
| PCP012148 | 10,65224447 | 10,68445935 | 10,43428419 | 10,22158712 | PCP012148 | XM_009371299 |
| PCP012149 | 9,854354156 | 9,736401931 | 9,801983132 | 9,699277464 |           |              |
| PCP012166 | 9,505156537 | 9,927289081 | 10,40266036 | 10,56795608 | PCP012166 | XM_009339019 |
| PCP012168 | 9,349458168 | 9,318926875 | 9,437398376 | 9,336885873 |           |              |
| PCP012170 | 8,935666001 | 9,070577167 | 9,299963518 | 9,657014692 | PCP012170 | XM_009363728 |
| PCP012171 | 8,86727874  | 8,79983204  | 8,987747198 | 9,52028473  | PCP012171 | XM_018648644 |
| PCP012186 | 9,156512913 | 9,139551352 | 9,24951645  | 9,555873659 | PCP012186 | XM_009351552 |
| PCP012189 | 10,97608434 | 11,0863552  | 10,90337727 | 10,63147721 | PCP012189 | XM_018644128 |
| PCP012211 | 10,13955135 | 10,09143539 | 10,10590851 | 10,03617361 | PCP012211 | XM_009366769 |
| PCP012214 | 9,84497247  | 9,649256178 | 9,711374448 | 9,646252679 | PCP012214 | XM_008351989 |
| PCP012215 | 9,255807556 | 9,336885873 | 9,517669388 | 10,11374217 |           |              |
| PCP012225 | 10,32493433 | 10,23202512 | 10,07236042 | 10,15566576 | PCP012225 | XM_009343782 |
| PCP012232 | 10,01076585 | 9,964817355 | 10,22842189 | 10,87958325 |           |              |
| PCP012274 | 9,949826711 | 9,991989442 | 10,08037786 | 10,36777511 |           |              |
| PCP012289 | 9,699867382 | 9,497193195 | 9,283852339 | 9,336885873 |           |              |



|           |             |             |             |             |           |              |
|-----------|-------------|-------------|-------------|-------------|-----------|--------------|
| PCP012292 | 10,38694025 | 10,47337091 | 10,59089576 | 10,8566823  | PCP012292 | XM_009361613 |
| PCP012305 | 9,16824589  | 9,032514148 | 8,95419631  | 9,115485887 | PCP012305 | XM_009368653 |
| PCP012310 | 9,97441459  | 9,931727372 | 10,05754504 | 10,37721053 |           |              |
| PCP012332 | 8,961941603 | 8,934663924 | 9,182394353 | 9,056177063 | PCP012332 | XM_008342025 |
| PCP012339 | 10,10678538 | 9,941531848 | 10,03846636 | 10,06383996 | PCP012339 | XM_009378488 |
| PCP012383 | 8,661778098 | 9,245552706 | 9,325687724 | 10,45155114 | PCP012383 | XM_009380747 |
| PCP012385 | 10,42940674 | 10,13741386 | 10,47944683 | 10,49685378 | PCP012385 | XM_009381445 |
| PCP012413 | 11,91911286 | 12,14072434 | 12,72387422 | 11,9799003  | PCP012413 | XM_009351897 |
| PCP012416 | 10,9710621  | 10,80842528 | 10,84862294 | 11,25974326 | PCP012416 | XM_009351886 |
| PCP012432 | 9,072347016 | 9,038918989 | 9,219967107 | 9,603626345 |           |              |
| PCP012437 | 10,78763325 | 10,28193003 | 10,16449216 | 9,725655961 | PCP012437 | XM_008364399 |
| PCP012474 | 9,14381685  | 9,195569065 | 9,091884919 | 8,30833903  |           |              |
| PCP012487 | 10,00702727 | 9,709083813 | 10,17033821 | 10,20741705 | PCP012487 | XM_008370016 |
| PCP012489 | 9,713678633 | 9,601157931 | 9,630576566 | 9,633594681 | PCP012489 | XM_017327120 |
| PCP012493 | 14,14768193 | 14,02695563 | 13,48242984 | 12,86186234 | PCP012493 | XM_009359175 |
| PCP012525 | 9,601157931 | 9,315149562 | 9,545601627 | 9,631777296 | PCP012525 | XM_009344611 |
| PCP012541 | 9,839203788 | 9,526166647 | 9,469641817 | 9,661778098 | PCP012541 | XM_017333448 |
| PCP012548 | 8,74929961  | 9,064284694 | 10,10895563 | 12,73146117 | PCP012548 | XM_009363912 |
| PCP012558 | 10,10852446 | 10,38010386 | 10,4118605  | 10,66562905 | PCP012558 | XM_009360867 |
| PCP012578 | 9,64385619  | 9,468970167 | 9,591204414 | 9,886199551 | PCP012578 | XM_009350440 |
| PCP012637 | 9,348728154 | 9,450530824 | 9,121533517 | 8,874458871 |           |              |
| PCP012645 | 8,842350343 | 9,160703421 | 9,182394353 | 11,19557522 | PCP012645 | XM_009381085 |
| PCP012685 | 8,577428828 | 8,696967526 | 9,151447887 | 9,352418676 |           |              |
| PCP012760 | 9,193944186 | 9,206208529 | 10,00936677 | 9,857980995 | PCP012760 | XM_009367001 |
| PCP012901 | 8,845490051 | 9,193944186 | 9,146365017 | 9,08833774  | PCP012901 | XM_009380354 |
| PCP012921 | 11,32717648 | 11,62311788 | 12,20263504 | 13,53121939 | PCP012921 | XM_009336405 |
| PCP012929 | 8,903881846 | 8,722226922 | 9,006550496 | 9,54239349  | PCP012929 | XM_009338878 |
| PCP012933 | 15,23818079 | 14,98801892 | 15,3043039  | 15,63226623 | PCP012933 | XM_009338871 |
| PCP012976 | 9,605479518 | 9,317412614 | 9,083027168 | 8,826548487 | PCP012976 | XM_009376873 |
| PCP012985 | 9,82707272  | 9,537218401 | 9,735268302 | 9,743706817 | PCP012985 | XM_008358084 |
| PCP012989 | 8,714245518 | 8,818038868 | 9           | 9,721099189 | PCP012989 | XM_009379912 |
| PCP013001 | 9,237616296 | 8,976334992 | 9,164906927 | 9,494515616 | PCP013001 | XM_009365221 |
| PCP013020 | 10,91513245 | 11,03800673 | 11,13485624 | 11,33501623 |           |              |
| PCP013046 | 8,926800034 | 8,893817229 | 8,963849777 | 9,416438656 |           |              |
| PCP013051 | 9,471675214 | 9,615316973 | 9,962896005 | 10,9213426  | PCP013051 | XM_008381326 |
| PCP013055 | 9,615316973 | 9,524208672 | 9,584962501 | 9,448467384 |           |              |
| PCP013058 | 10,30796352 | 10,22641219 | 10,34687935 | 10,64806092 | PCP013058 | XM_008354748 |
| PCP013075 | 9,965784285 | 10,08967557 | 10,12841972 | 10,10197567 | PCP013075 | XM_008354741 |
| PCP013081 | 11,47775827 | 11,67168701 | 11,67154107 | 11,69508471 |           |              |
| PCP013084 | 9,836571147 | 10,11286951 | 10,16490693 | 10,1176431  | PCP013084 | XM_008370014 |
| PCP013107 | 11,69884789 | 11,53592172 | 11,56446868 | 11,59820607 |           |              |
| PCP013109 | 9,904378722 | 9,75710661  | 9,988684687 | 10,19639311 | PCP013109 | XM_017334107 |
| PCP013117 | 10,39446269 | 10,40372574 | 10,60733031 | 10,82681063 |           |              |
| PCP013123 | 9,842350343 | 9,925302224 | 10,39732167 | 11,42871086 |           |              |
| PCP013134 | 9,683573652 | 9,689997971 | 9,627533884 | 9,456005251 | PCP013134 | XM_008339473 |
| PCP013137 | 10,6079498  | 10,57648435 | 10,90212635 | 11,55474712 | PCP013137 | XR_001952935 |

|           |             |             |             |             |           |              |
|-----------|-------------|-------------|-------------|-------------|-----------|--------------|
| PCP013139 | 8,946409212 | 8,811631578 | 9,042562264 | 9,403715086 |           |              |
| PCP013141 | 10,36158196 | 10,74819285 | 11,72692911 | 13,71077093 | PCP013141 | XM_009354377 |
| PCP013157 | 9,159871337 | 9,209453366 | 9,250298418 | 9,219967107 | PCP013157 | XM_009372971 |
| PCP013180 | 9,772034091 | 9,273795599 | 9,588096205 | 9,693486957 |           |              |
| PCP013209 | 10,25738784 | 9,707359132 | 9,842868866 | 9,562872035 | PCP013209 | XM_009370890 |
| PCP013216 | 10,77011049 | 10,41785251 | 11,23002044 | 11,01239408 | PCP013216 | XM_009350502 |
| PCP013239 | 13,31226894 | 13,10678047 | 13,27306708 | 13,68090889 | PCP013239 | XM_018643342 |
| PCP013256 | 9,049848549 | 8,903881846 | 9,33911511  | 10,06564501 |           |              |
| PCP013263 | 10,45738088 | 10,35167912 | 10,55362929 | 10,72280753 | PCP013263 | XM_009365990 |
| PCP013269 | 9,391608782 | 9,464198563 | 9,600526229 | 9,873951581 | PCP013269 | XM_009366052 |
| PCP013276 | 9,659995892 | 9,750422271 | 9,898344415 | 10,26091953 |           |              |
| PCP013286 | 8,751544059 | 8,731319031 | 8,866258916 | 9,19063955  | PCP013286 | XM_009366317 |
| PCP013305 | 13,34003506 | 14,22947001 | 14,05547988 | 14,56347456 | PCP013305 | XM_009381288 |
| PCP013307 | 9,336127147 | 10,57900473 | 10,3527828  | 10,81804686 | PCP013307 | XM_009381285 |
| PCP013311 | 9,251079962 | 8,634193917 | 9,005624549 | 9,423473125 | PCP013311 | XM_009381293 |
| PCP013313 | 9,372146798 | 9,321184013 | 9,430452552 | 9,315149562 |           |              |
| PCP013315 | 8,980139578 | 9,226412193 | 9,187352073 | 9,722807531 | PCP013315 | XM_009339845 |
| PCP013331 | 8,810571635 | 8,689997971 | 8,792237182 | 9,186535222 |           |              |
| PCP013356 | 9,789533645 | 9,822299952 | 9,869855987 | 10,45087101 |           |              |
| PCP013361 | 10,10939974 | 10,30073006 | 10,13656824 | 9,854868383 |           |              |
| PCP013374 | 9,72395099  | 9,790625442 | 9,687673116 | 10,04530918 | PCP013374 | XM_009351446 |
| PCP013379 | 9,06250492  | 9,074141463 | 8,970594857 | 9,459431619 |           |              |
| PCP013399 | 9,900866808 | 9,970105891 | 9,991054099 | 10,01495499 | PCP013399 | XM_009368005 |
| PCP013403 | 13,08464232 | 12,97620609 | 13,20584364 | 13,80685166 |           |              |
| PCP013407 | 9,269898093 | 9,330916878 | 9,438791853 | 9,240004193 | PCP013407 | XM_009341676 |
| PCP013415 | 10,6617781  | 11,21148073 | 11,70246275 | 12,4388776  | PCP013415 | XM_009370809 |
| PCP013423 | 9,834992412 | 10,12240095 | 10,12412131 | 10,23999226 |           |              |
| PCP013427 | 10,46658634 | 10,23801057 | 10,53818893 | 10,66326455 | PCP013427 | XM_009370827 |
| PCP013428 | 12,66006945 | 12,24406646 | 12,72841587 | 13,10579886 | PCP013428 | XM_009370828 |
| PCP013445 | 8,142974967 | 9,051671182 | 9,951284715 | 9,630576566 |           |              |
| PCP013449 | 10,32830467 | 10,24911345 | 10,43948809 | 10,3818998  | PCP013449 | XM_008242209 |
| PCP013457 | 10,17533747 | 9,960972093 | 10,30757652 | 10,69232781 | PCP013457 | XM_009354889 |
| PCP013472 | 11,22380263 | 11,22741739 | 11,24198315 | 11,81043909 | PCP013472 | XM_009365139 |
| PCP013492 | 10,22921538 | 10,32530546 | 10,80842528 | 10,83657904 | PCP013492 | XM_009359230 |
| PCP013495 | 8,678318438 | 8,811631578 | 9,210257347 | 9,675957033 | PCP013495 | XM_009359248 |
| PCP013496 | 9,22881869  | 9,50118036  | 9,611633479 | 9,669469742 | PCP013496 | XM_009359240 |
| PCP013513 | 10,05663772 | 10,28733146 | 10,41397693 | 10,64595559 |           |              |
| PCP013514 | 10,71739368 | 10,73893668 | 10,83368075 | 10,69174352 | PCP013514 | XM_017326078 |
| PCP013522 | 9,28077077  | 9,369968059 | 9,513076164 | 10,00936677 | PCP013522 | XM_008385922 |
| PCP013546 | 8,77478706  | 8,882643049 | 8,89684702  | 9,411510988 |           |              |
| PCP013561 | 9,539158811 | 9,465566405 | 9,593073602 | 9,887220615 | PCP013561 | XM_009376740 |
| PCP013601 | 9,388017285 | 9,405843489 | 9,71195944  | 10,68328415 | PCP013601 | XM_008395673 |
| PCP013603 | 8,632995197 | 8,760453835 | 8,928755227 | 9,141264175 | PCP013603 | XM_009369647 |
| PCP013609 | 11,17263377 | 11,42678889 | 11,43062504 | 11,65835878 | PCP013609 | XM_009369635 |
| PCP013624 | 9,023283079 | 8,917879246 | 8,929761415 | 8,953236133 |           |              |
| PCP013627 | 9,089238597 | 9,075024475 | 9,083931345 | 9,482465137 |           |              |

|           |             |             |             |             |           |              |
|-----------|-------------|-------------|-------------|-------------|-----------|--------------|
| PCP013672 | 11,78067509 | 11,68460399 | 11,75126369 | 12,16898544 | PCP013672 | XM_008343339 |
| PCP013673 | 9,685326985 | 9,48984796  | 9,799281622 | 10,28733146 | PCP013673 | XM_008343340 |
| PCP013693 | 9,604238155 | 9,548821908 | 9,439477697 | 8,947403166 | PCP013693 | XM_009350397 |
| PCP013700 | 9,938594555 | 9,734150722 | 10,09671515 | 10,23442228 |           |              |
| PCP013715 | 8,382278171 | 8,481113232 | 9,267559206 | 9,604868234 | PCP013715 | XM_018650665 |
| PCP013718 | 9,10938668  | 9,111996335 | 9,14381685  | 8,844454703 |           |              |
| PCP013722 | 9,629957618 | 9,604868234 | 9,702744108 | 9,600526229 |           |              |
| PCP013729 | 10,78708632 | 10,2332242  | 11,15797845 | 12,18353304 | PCP013729 | XM_009381126 |
| PCP013731 | 9,855911856 | 10,06025009 | 10,05979059 | 10,4015942  | PCP013731 | XM_009381129 |
| PCP013734 | 11,19187968 | 11,20171349 | 11,3089078  | 11,21067134 | PCP013734 | XM_008338751 |
| PCP013739 | 8,939579214 | 8,751544059 | 9,029756544 | 9,28925812  | PCP013739 | XM_009346870 |
| PCP013752 | 9,286164981 | 9,415044544 | 9,433230722 | 9,388017285 |           |              |
| PCP013754 | 11,3149627  | 11,08347933 | 11,09649775 | 11,06317259 | PCP013754 | XM_008356823 |
| PCP013758 | 8,832890014 | 8,706219712 | 8,884689491 | 9,142107057 |           |              |
| PCP013761 | 9,722244002 | 9,730181399 | 9,925302224 | 10,12928302 | PCP013761 | XM_009366543 |
| PCP013768 | 10,26288177 | 10,08436993 | 10,10416627 | 9,915879379 | PCP013768 | XM_008380471 |
| PCP013820 | 9,098032083 | 9,227206781 | 9,393025715 | 9,835529375 | PCP013820 | XM_020568996 |
| PCP013830 | 10,85512543 | 10,76983784 | 10,86676119 | 11,13870058 | PCP013830 | XM_009340659 |
| PCP013836 | 9,706202442 | 9,690574236 | 9,726780139 | 9,706789535 | PCP013836 | XM_009337818 |
| PCP013854 | 10,04165915 | 10,05347794 | 10,22641219 | 10,17700835 | PCP013854 | XM_009358903 |
| PCP013880 | 10,04939934 | 10,06383996 | 10,15228484 | 10,49752255 | PCP013880 | XM_009341587 |
| PCP013881 | 10,36995716 | 10,28115343 | 10,36777511 | 10,36959735 | PCP013881 | XM_009341586 |
| PCP013939 | 8,941546519 | 9,202931899 | 9,450530824 | 9,834992412 | PCP013939 | XM_008384928 |
| PCP013944 | 8,660602089 | 9,370687407 | 9,456703495 | 9,472345607 |           |              |
| PCP013948 | 8,554588852 | 8,28692734  | 9,09011242  | 9,438791853 | PCP013948 | XM_009336352 |
| PCP013950 | 11,88836274 | 11,87382857 | 12,12863881 | 12,47666268 | PCP013950 | XM_009336347 |
| PCP013974 | 12,38235383 | 12,53584155 | 12,31741261 | 12,01250931 | PCP013974 | NM_001294026 |
| PCP013989 | 8,376472723 | 8,667714757 | 9,094526396 | 9,361943774 | PCP013989 | XM_009374398 |
| PCP013992 | 9,104153166 | 9,077696975 | 9,220789431 | 9,086587411 | PCP013992 | XM_009361467 |
| PCP014003 | 10,78272799 | 11,36959735 | 11,9690267  | 12,75481862 | PCP014003 | XM_009369314 |
| PCP014004 | 9,893301531 | 9,882643049 | 10,05979059 | 9,850702552 |           |              |
| PCP014018 | 10,25463892 | 10,56001751 | 10,71052234 | 10,71224325 | PCP014018 | XM_018643152 |
| PCP014019 | 10,46658634 | 10,46692276 | 10,41256985 | 10,05619061 | PCP014019 | XM_009339047 |
| PCP014028 | 10,11981006 | 10,23760435 | 10,33464201 | 10,77176181 |           |              |
| PCP014031 | 8,522267655 | 8,967716202 | 9,086587411 | 9,068778278 | PCP014031 | XM_009368322 |
| PCP014041 | 10,4101015  | 10,11894107 | 9,497851837 | 11,203348   | PCP014041 | XM_009381360 |
| PCP014047 | 10,11070515 | 10,48716675 | 10,52094273 | 11,16574239 | PCP014047 | XM_009352804 |
| PCP014056 | 9,840258649 | 9,567956075 | 9,628135642 | 9,938109326 | PCP014056 | XM_018651171 |
| PCP014070 | 10,80170836 | 10,71138305 | 10,83709964 | 11,14465824 | PCP014070 | XM_008366259 |
| PCP014074 | 9,801433534 | 9,750422271 | 9,845490051 | 9,705062108 | PCP014074 | XM_008387452 |
| PCP014076 | 9,582461918 | 9,727920455 | 9,611633479 | 9,402308618 | PCP014076 | XM_009360486 |
| PCP014082 | 9,72395099  | 9,722244002 | 9,842868866 | 10,20945337 | PCP014082 | XM_009350030 |
| PCP014089 | 9,324180547 | 9,273026268 | 9,446400988 | 9,698704667 | PCP014089 | XR_001788859 |
| PCP014090 | 8,667714757 | 8,772578508 | 8,968666793 | 9,344295908 |           |              |
| PCP014107 | 9,952260754 | 10,08569817 | 10,12369465 | 9,937123663 |           |              |
| PCP014123 | 9,202931899 | 9,162391329 | 9,468970167 | 9,320416982 |           |              |

|           |             |             |             |             |           |              |
|-----------|-------------|-------------|-------------|-------------|-----------|--------------|
| PCP014138 | 12,47505701 | 12,44613472 | 12,67249827 | 12,73760016 | PCP014138 | XR_001951679 |
| PCP014154 | 9,156512913 | 9,189009107 | 9,355351096 | 9,634212071 | PCP014154 | XM_009371928 |
| PCP014183 | 8,868297843 | 8,886702554 | 9,116343961 | 9,341340908 |           |              |
| PCP014191 | 8,607330314 | 8,951284715 | 9,705062108 | 10,11504365 | PCP014191 | XM_009380238 |
| PCP014209 | 9,452591317 | 9,303027245 | 9,453949632 | 9,353146825 | PCP014209 | XM_009345146 |
| PCP014309 | 9,163221961 | 9,115485887 | 8,904875427 | 9,040755473 | PCP014309 | XM_009360623 |
| PCP014347 | 11,29672697 | 11,1486863  | 11,19987475 | 11,67360501 | PCP014347 | XM_008390584 |
| PCP014512 | 10,26013154 | 10,37250597 | 10,23720996 | 9,750991645 |           |              |
| PCP014532 | 14,34281569 | 14,20061742 | 14,15151844 | 13,87408515 | PCP014532 | XM_008356432 |
| PCP014541 | 9,544964433 | 9,530737953 | 9,63540978  | 9,979668125 |           |              |
| PCP014543 | 11,21936821 | 11,27631636 | 11,30492167 | 10,9398216  |           |              |
| PCP014559 | 9,71539578  | 9,893301531 | 9,97441459  | 10,25266543 | PCP014559 | XM_018652252 |
| PCP014562 | 9,712527    | 9,434628228 | 9,598666678 | 9,429050993 | PCP014562 | XM_009376004 |
| PCP014567 | 9,571752644 | 10,01216358 | 9,967701794 | 9,987732989 | PCP014567 | XM_017327685 |
| PCP014569 | 9,485165154 | 8,759322309 | 8,860062694 | 9,366322214 | PCP014569 | XM_009376025 |
| PCP014578 | 10,11461429 | 9,961927137 | 10,15186643 | 10,05165759 |           |              |
| PCP014579 | 10,25935488 | 10,63571812 | 10,71138305 | 10,66829112 | PCP014579 | XM_009376045 |
| PCP014583 | 9,30986284  | 9,457380879 | 9,336127147 | 9,390168956 |           |              |
| PCP014586 | 9,816455711 | 9,691743519 | 9,70333261  | 9,7409107   | PCP014586 | XM_009376061 |
| PCP014590 | 8,827596761 | 8,861086906 | 9,618385502 | 8,873444113 | PCP014590 | XM_008357539 |
| PCP014593 | 9,57680554  | 9,018673116 | 9,30986284  | 9,710238196 | PCP014593 | XM_008387790 |
| PCP014601 | 8,918863237 | 8,912889336 | 8,987747198 | 9,567956075 |           |              |
| PCP014605 | 9,846540327 | 9,96337297  | 9,92381771  | 9,982993575 |           |              |
| PCP014624 | 9,299963518 | 9,290779173 | 9,466932951 | 9,793326936 |           |              |
| PCP014625 | 10,34207467 | 10,3586512  | 10,35093918 | 10,68591388 |           |              |
| PCP014646 | 8,908902953 | 8,861086906 | 9,013099307 | 9,499188155 | PCP014646 | XR_001790310 |
| PCP014654 | 10,09891375 | 10,16574867 | 10,56573996 | 11,10000522 | PCP014654 | XM_009351501 |
| PCP014656 | 10,33091688 | 10,13484983 | 10,21310422 | 10,49785184 | PCP014656 | XM_009351482 |
| PCP014665 | 8,760453835 | 8,892785649 | 8,972491628 | 9,236803511 | PCP014665 | XM_008393957 |
| PCP014697 | 8,591223118 | 8,884689491 | 9,469641817 | 10,49618469 | PCP014697 | XM_009353663 |
| PCP014698 | 8,75043902  | 8,79983204  | 8,907882108 | 9,594324604 |           |              |
| PCP014700 | 10,81191249 | 10,87267488 | 10,77313921 | 10,95831345 | PCP014700 | XM_009353671 |
| PCP014706 | 8,988684687 | 9,434628228 | 9,020507757 | 9,309089764 |           |              |
| PCP014707 | 9,33911511  | 9,452591317 | 9,54303182  | 9,369226538 |           |              |
| PCP014714 | 9,77148947  | 9,695802471 | 9,989635757 | 9,915386449 | PCP014714 | XM_009353697 |
| PCP014715 | 10,01402047 | 9,875488276 | 9,985372344 | 10,52845411 | PCP014715 | XM_008382994 |
| PCP014722 | 9,756005825 | 9,753216749 | 9,951765533 | 9,40017499  | PCP014722 | XM_009375655 |
| PCP014743 | 9,137836494 | 9,293080746 | 9,330916878 | 8,91489335  |           |              |
| PCP014756 | 11,66533592 | 11,70289558 | 11,71496239 | 11,99870677 |           |              |
| PCP014760 | 9,895832748 | 9,915879379 | 10,01076585 | 10,45909345 | PCP014760 | XM_009348851 |
| PCP014772 | 13,06159565 | 13,02317737 | 13,27394126 | 13,74770313 |           |              |
| PCP014810 | 10,1980398  | 10,09978174 | 10,05165759 | 10,11156607 | PCP014810 | XM_009355725 |
| PCP014816 | 8,345760055 | 8,710806434 | 8,985841937 | 9,423473125 |           |              |
| PCP014820 | 11,2380046  | 11,23421868 | 11,31439631 | 11,14082977 |           |              |
| PCP014832 | 10,23720996 | 10,83709964 | 10,87395927 | 11,22359752 | PCP014832 | XM_009365815 |
| PCP014836 | 9,20701432  | 8,885696373 | 9,119797095 | 9,133578937 | PCP014836 | XM_018649105 |

|           |             |             |             |             |           |              |
|-----------|-------------|-------------|-------------|-------------|-----------|--------------|
| PCP014859 | 10,13869418 | 10,35351076 | 10,21513253 | 10,23840474 |           |              |
| PCP014876 | 9,187352073 | 8,937609223 | 9,048023611 | 9,064284694 | PCP014876 | XM_018650483 |
| PCP014882 | 8,763776717 | 9,056177063 | 9,02699366  | 9,030667136 |           |              |
| PCP014885 | 9,8159116   | 9,714812179 | 9,733015322 | 10,33502182 | PCP014885 | XM_009373449 |
| PCP014886 | 9,131856961 | 8,941546519 | 8,824417827 | 8,537878433 |           |              |
| PCP014900 | 9,894817763 | 9,970105891 | 9,953716302 | 9,90287251  | PCP014900 | XM_018650833 |
| PCP014914 | 9,381542951 | 9,159038773 | 9,1807297   | 9,348728154 |           |              |
| PCP014945 | 10,80224977 | 10,68006937 | 10,71195084 | 11,04984855 |           |              |
| PCP014979 | 8,944477815 | 9,095397023 | 8,936637939 | 8,912889336 | PCP014979 | XM_009377678 |
| PCP014984 | 9,82124782  | 10,07190476 | 10,3786525  | 11,2380046  | PCP014984 | XM_009377770 |
| PCP014986 | 11,80695233 | 11,82535634 | 11,75112558 | 11,89089883 | PCP014986 | XM_008353091 |
| PCP015003 | 9,912395383 | 9,696967526 | 9,819652219 | 10,15440043 |           |              |
| PCP015023 | 9,042562264 | 8,950322598 | 9,213517401 | 9,503825738 | PCP015023 | XM_009340339 |
| PCP015033 | 9,794951903 | 9,809494835 | 9,828136484 | 9,786269628 | PCP015033 | XM_009365594 |
| PCP015051 | 10,86805085 | 10,88696923 | 10,98560716 | 11,34872815 | PCP015051 | XM_009363859 |
| PCP015078 | 11,09715646 | 11,04780555 | 11,15860969 | 11,13485624 | PCP015078 | XR_001953838 |
| PCP015098 | 10,63026713 | 10,61991732 | 10,77944852 | 10,39767463 | PCP015098 | XM_009377332 |
| PCP015111 | 10,36705431 | 10,18031945 | 10,11156607 | 10,61409325 |           |              |
| PCP015119 | 8,84024291  | 8,940548521 | 8,887738491 | 9,620219826 |           |              |
| PCP015123 | 9,394462695 | 9,407267764 | 9,658800582 | 10,00281502 |           |              |
| PCP015137 | 9,97632067  | 10,04028972 | 10,11981006 | 10,0588982  |           |              |
| PCP015170 | 9,02699366  | 9,195569065 | 9,136991112 | 9,155653112 | PCP015170 | XM_009347109 |
| PCP015176 | 8,886702554 | 8,938609256 | 9,47370575  | 10,0018726  | PCP015176 | XM_009347101 |
| PCP015179 | 10,10459875 | 10,18982456 | 10,42171772 | 11,00982862 |           |              |
| PCP015196 | 8,922822231 | 8,75598914  | 9,011227255 | 9,254249162 | PCP015196 | XM_008382982 |
| PCP015210 | 8,741466986 | 8,759322309 | 8,980139578 | 9,345028167 | PCP015210 | XM_009344629 |
| PCP015230 | 13,28939502 | 13,09967655 | 13,34914298 | 13,70040395 | PCP015230 | XM_009361941 |
| PCP015234 | 9,80843332  | 9,63481105  | 9,762664404 | 9,699867382 | PCP015234 | XM_009361957 |
| PCP015260 | 11,85992297 | 11,80547385 | 12,08724072 | 12,66259495 | PCP015260 | XM_008374843 |
| PCP015267 | 10,39267161 | 9,814854798 | 9,982523054 | 9,494515616 | PCP015267 | XM_009365894 |
| PCP015281 | 9,422758607 | 9,037080165 | 9,240791332 | 9,337621902 | PCP015281 | XM_009353349 |
| PCP015283 | 9,419960178 | 9,512404684 | 10,01216358 | 9,975375111 | PCP015283 | XR_666712    |
| PCP015303 | 10,25856603 | 10,08569817 | 10,09539702 | 10,14551188 | PCP015303 | XM_009370958 |
| PCP015309 | 11,77684423 | 11,59385794 | 11,54077221 | 11,73626239 |           |              |
| PCP015317 | 10,2179577  | 9,972017669 | 9,892284763 | 10,06069593 | PCP015317 | XM_009368263 |
| PCP015318 | 9,722244002 | 9,24951645  | 9,581200582 | 9,763212367 | PCP015318 | XM_009368471 |
| PCP015341 | 11,42836017 | 11,47590059 | 11,57301753 | 11,51799902 | PCP015341 | XM_009372841 |
| PCP015350 | 8,91489335  | 9,053464362 | 9,167418146 | 9,468277836 | PCP015350 | XM_008363435 |
| PCP015354 | 10,59276535 | 10,46522967 | 10,67830963 | 11,00211178 |           |              |
| PCP015369 | 9,606719814 | 9,630576566 | 9,47100451  | 8,895817605 | PCP015369 | XM_018647842 |
| PCP015390 | 9,066977144 | 8,89684702  | 9,104153166 | 9,342808055 | PCP015390 | XM_009363153 |
| PCP015415 | 8,709669735 | 8,76927586  | 8,946409212 | 9,321184013 | PCP015415 | XM_009360686 |
| PCP015419 | 9,731879027 | 10,11113567 | 10,09671515 | 11,46267097 |           |              |
| PCP015475 | 10,83709964 | 10,73696841 | 10,80547788 | 11,07770365 |           |              |
| PCP015480 | 9,574271841 | 9,534633604 | 9,357552005 | 8,64385619  | PCP015480 | XM_018647298 |
| PCP015482 | 9,748746336 | 9,527477006 | 9,862637358 | 9,83447105  | PCP015482 | XM_018647296 |

|           |             |             |             |             |           |              |
|-----------|-------------|-------------|-------------|-------------|-----------|--------------|
| PCP015491 | 11,33408889 | 11,41309898 | 11,44811631 | 11,476407   | PCP015491 | XM_009339086 |
| PCP015512 | 9,124974266 | 9,283088353 | 9,218369492 | 9,567956075 | PCP015512 | XM_009344547 |
| PCP015517 | 11,53915881 | 11,42294252 | 11,4252159  | 11,42992974 | PCP015517 | XM_018647282 |
| PCP015555 | 10,09099894 | 10,017741   | 10,18115226 | 10,50548408 | PCP015555 | XM_008370343 |
| PCP015562 | 9,185693134 | 9,054387253 | 9,123267853 | 9,037080165 | PCP015562 | XM_009355740 |
| PCP015567 | 10,62357975 | 10,39909631 | 10,59681404 | 10,77616158 | PCP015567 | XM_009355668 |
| PCP015613 | 9,743151394 | 9,804131021 | 9,983463942 | 9,895832748 | PCP015613 | XM_008356635 |
| PCP015674 | 8,735826768 | 8,719970574 | 8,765965634 | 9,510427928 | PCP015674 | XM_009336000 |
| PCP015676 | 9,170751309 | 9,098032083 | 9,077696975 | 9,54173552  |           |              |
| PCP015692 | 10,0945132  | 10,04028972 | 10,08304047 | 10,06877828 | PCP015692 | XR_664979    |
| PCP015702 | 10,73583523 | 10,87190524 | 10,8677961  | 11,11525828 |           |              |
| PCP015735 | 8,956143797 | 8,689997971 | 8,997179481 | 9,195569065 |           |              |
| PCP015740 | 10,27999355 | 10,32229999 | 10,30415735 | 10,31967212 | PCP015740 | XM_009361502 |
| PCP015797 | 9,193106413 | 9,154818109 | 9,276892087 | 9,709083813 |           |              |
| PCP015798 | 11,3170338  | 11,32867493 | 11,25876034 | 10,92950254 | PCP015798 | XM_009341361 |
| PCP015804 | 11,29001885 | 11,28173881 | 11,38909352 | 11,66058872 |           |              |
| PCP015821 | 10,00982862 | 9,812177306 | 9,984888362 | 10,29155061 |           |              |
| PCP015824 | 11,22339841 | 11,32624408 | 11,25778264 | 11,20864284 | PCP015824 | XM_009379993 |
| PCP015830 | 11,54930337 | 11,39642818 | 11,34522226 | 11,26893376 | PCP015830 | XM_009351968 |
| PCP015889 | 10,05301628 | 9,911886285 | 10,05619061 | 10,3383687  | PCP015889 | XM_017331478 |
| PCP015919 | 12,09967655 | 12,15618739 | 12,40247917 | 12,74651432 | PCP015919 | XM_009370512 |
| PCP015930 | 10,67006312 | 10,41433641 | 10,39446269 | 10,19475685 |           |              |
| PCP015933 | 10,67860014 | 10,68035952 | 10,9346713  | 11,11807805 | PCP015933 | XM_009346384 |
| PCP015937 | 10,89809496 | 10,97226185 | 11,09847299 | 11,29901908 | PCP015937 | XM_008393049 |
| PCP015950 | 8,722226922 | 8,939579214 | 8,763776717 | 9,414325838 | PCP015950 | XM_008359023 |
| PCP015963 | 12,16386034 | 11,99258434 | 11,87651695 | 12,07380685 | PCP015963 | XM_008375970 |
| PCP016036 | 9,89985536  | 9,691743519 | 9,923327485 | 10,68678939 | PCP016036 | XM_009378737 |
| PCP016074 | 10,72792045 | 10,55906156 | 10,68941274 | 10,09143539 | PCP016074 | XR_666943    |
| PCP016214 | 10,45738088 | 10,11070515 | 10,08304047 | 10,16449216 | PCP016214 | XM_009364967 |
| PCP016221 | 9,598666678 | 9,619614757 | 9,535916864 | 9,529430554 | PCP016221 | XM_009337864 |
| PCP016230 | 8,647458426 | 8,782441329 | 8,919846558 | 9,250298418 |           |              |
| PCP016231 | 10,29806257 | 10,03066714 | 10,21148681 | 10,49352525 |           |              |
| PCP016252 | 8,925791779 | 9,047123912 | 9,283088353 | 9,633594681 | PCP016252 | XM_009371267 |
| PCP016272 | 9,11113567  | 9,028817757 | 9,200481794 | 9,489185654 |           |              |
| PCP016282 | 8,637820329 | 8,78571401  | 8,95805965  | 9,122388003 | PCP016282 | XM_008339920 |
| PCP016297 | 10,11026144 | 10,09407769 | 10,0768156  | 10,48449062 | PCP016297 | XM_009373336 |
| PCP016303 | 9,54239349  | 9,598666678 | 9,812177306 | 10,01168851 | PCP016303 | XM_009380274 |
| PCP016304 | 9,223205318 | 8,924812504 | 9,182394353 | 9,372146798 | PCP016304 | XM_009380264 |
| PCP016317 | 11,02859678 | 10,66711154 | 10,73047014 | 11,05799172 |           |              |
| PCP016332 | 9,118084543 | 9,202931899 | 9,30986284  | 9,668884984 | PCP016332 | XM_009376592 |
| PCP016358 | 8,723387907 | 9,044394119 | 9,318158642 | 9,722244002 | PCP016358 | XM_009376207 |
| PCP016363 | 10,65761321 | 10,85330956 | 10,77505877 | 10,91637961 | PCP016363 | XM_009363414 |
| PCP016365 | 14,3408703  | 14,34988038 | 14,51438552 | 14,82580351 | PCP016365 | XM_009363331 |
| PCP016369 | 9,640841416 | 9,660584264 | 9,764324258 | 10,12541347 |           |              |
| PCP016370 | 8,727920455 | 8,851749041 | 8,907882108 | 9,252665432 |           |              |
| PCP016421 | 8,993419626 | 9,064284694 | 9,05709822  | 9,066977144 | PCP016421 | XM_009341514 |

|           |             |             |             |             |           |              |
|-----------|-------------|-------------|-------------|-------------|-----------|--------------|
| PCP016439 | 11,19023829 | 10,45361017 | 10,9331964  | 11,56953761 | PCP016439 | XM_009341499 |
| PCP016478 | 9,391608782 | 9,821773982 | 9,986311377 | 10,39695792 | PCP016478 | XM_009377791 |
| PCP016496 | 10,71195084 | 10,75655632 | 10,76597392 | 11,16637024 | PCP016496 | XM_009337686 |
| PCP016500 | 8,98205238  | 9,057991723 | 8,982993575 | 8,929761415 |           |              |
| PCP016563 | 9,039823818 | 8,862110391 | 9,017727086 | 9,285402219 | PCP016563 | XM_009359362 |
| PCP016572 | 10,33278624 | 9,969631147 | 10,01634867 | 9,775330438 |           |              |
| PCP016593 | 12,19013332 | 12,31061278 | 12,68489542 | 13,21376191 | PCP016593 | XM_009352246 |
| PCP016609 | 11,83683936 | 11,4971882  | 11,83828606 | 12,23999525 | PCP016609 | XM_009365848 |
| PCP016614 | 8,666508075 | 8,759322309 | 8,851749041 | 9,107661718 |           |              |
| PCP016618 | 9,794951903 | 9,951765533 | 9,721099189 | 9,895317771 | PCP016618 | XM_009365835 |
| PCP016635 | 9,096267125 | 9,020507757 | 9,161560218 | 8,909893084 | PCP016635 | XM_008339177 |
| PCP016638 | 11,02075081 | 11,09781487 | 11,11894107 | 11,18487534 | PCP016638 | XM_018644862 |
| PCP016655 | 8,943481842 | 9,473035989 | 9,505156537 | 9,489185654 | PCP016655 | XM_009366596 |
| PCP016661 | 9,49651428  | 8,265239967 | 8,383704292 | 10,87190524 |           |              |
| PCP016681 | 11,65090365 | 11,81297947 | 11,87075    | 12,28655776 |           |              |
| PCP016688 | 10,02974274 | 10,00235092 | 9,920352855 | 9,749869427 | PCP016688 | XM_018649396 |
| PCP016695 | 10,10634047 | 9,731319031 | 10,01262454 | 9,875488276 |           |              |
| PCP016731 | 9,55522181  | 9,56414949  | 9,710806434 | 9,594324604 | PCP016731 | XM_018652152 |
| PCP016740 | 9,139551352 | 8,91489335  | 8,929761415 | 8,938609256 |           |              |
| PCP016754 | 9,151447887 | 9,344295908 | 9,456005251 | 9,790625442 |           |              |
| PCP016768 | 9,154818109 | 9,24951645  | 9,283088353 | 9,624484772 | PCP016768 | XM_009350480 |
| PCP016773 | 10,5955652  | 10,30263892 | 10,69783636 | 10,72052644 | PCP016773 | XM_008354674 |
| PCP016775 | 9,851233701 | 10,00046486 | 10,10939974 | 9,898344415 | PCP016775 | XM_009350081 |
| PCP016789 | 8,860062694 | 8,943481842 | 8,910882535 | 9,321184013 |           |              |
| PCP016810 | 13,79136641 | 13,91382439 | 14,00140819 | 14,98272625 | PCP016810 | XM_009371764 |
| PCP016816 | 8,804131021 | 8,654636029 | 8,967716202 | 9,119797095 | PCP016816 | XM_009347006 |
| PCP016824 | 9,8159116   | 10,14635229 | 9,734150722 | 10,04484489 | PCP016824 | XM_008361564 |
| PCP016825 | 9,816983623 | 9,384416825 | 9,22881869  | 9,399448837 | PCP016825 | NM_001319808 |
| PCP016829 | 10,31174832 | 10,18198458 | 10,20863674 | 10,51668495 | PCP016829 | XM_008368939 |
| PCP016830 | 10,18198458 | 10,21350525 | 10,39410894 | 11,05753827 | PCP016830 | XM_008392471 |
| PCP016840 | 11,80654962 | 11,96458274 | 12,03720374 | 12,15555509 |           |              |
| PCP016881 | 8,960957618 | 9,173252384 | 9,131856961 | 9,184875343 |           |              |
| PCP016889 | 9,006550496 | 8,787902559 | 8,740354199 | 8,934663924 | PCP016889 | XM_009340545 |
| PCP016918 | 8,692336525 | 8,816983623 | 8,993419626 | 9,345028167 |           |              |
| PCP016921 | 9,026053072 | 9,16824589  | 9,71195944  | 9,536577492 |           |              |
| PCP016926 | 9,749869427 | 9,7409107   | 9,477090385 | 9,441554026 | PCP016926 | XM_009360940 |
| PCP016928 | 8,796591265 | 9,003742767 | 9,342074668 | 9,849139214 | PCP016928 | XM_018648100 |
| PCP016929 | 9,21916852  | 9,067891433 | 9,199672345 | 9,73809226  | PCP016929 | XM_009360948 |
| PCP016936 | 9,889245365 | 9,816983623 | 9,908392621 | 9,805211831 | PCP016936 | XM_017328848 |
| PCP016939 | 9,032514148 | 9,098900598 | 9,336127147 | 10,1301458  | PCP016939 | XM_017326188 |
| PCP016957 | 11,11850638 | 11,03043954 | 11,0500731  | 10,83235998 |           |              |
| PCP016966 | 10,98631849 | 11,45601039 | 11,28905635 | 11,30416306 | PCP016966 | XM_009351815 |
| PCP016971 | 9,651051691 | 9,929258409 | 10,19926745 | 10,41925445 |           |              |
| PCP016974 | 9,837627933 | 9,6171552   | 9,981567282 | 10,14889598 |           |              |
| PCP016986 | 9,445697739 | 9,048023611 | 9,490509963 | 9,224001674 | PCP016986 | XM_008387634 |
| PCP017003 | 8,816983623 | 9,123267853 | 9,324180547 | 10,02052165 | PCP017003 | XM_009361436 |

|           |             |             |             |             |           |              |
|-----------|-------------|-------------|-------------|-------------|-----------|--------------|
| PCP017004 | 9,216745858 | 9,286950435 | 9,136991112 | 8,815927606 |           |              |
| PCP017009 | 10,3305472  | 9,660584264 | 9,162391329 | 8,625708843 |           |              |
| PCP017043 | 8,727920455 | 8,953236133 | 9,072347016 | 9,28000515  | PCP017043 | XM_009344061 |
| PCP017051 | 13,92944336 | 13,8162837  | 13,90162116 | 14,22188916 | PCP017051 | XM_009344070 |
| PCP017060 | 11,90149672 | 11,8761332  | 12,12788795 | 12,19752388 | PCP017060 | XM_008381783 |
| PCP017080 | 9,012149614 | 9,113742166 | 9,391608782 | 9,424166289 | PCP017080 | XM_009367525 |
| PCP017098 | 10,86444153 | 10,91014051 | 11,00772811 | 11,38980877 |           |              |
| PCP017106 | 10,31061278 | 10,26482961 | 10,31628153 | 10,22881869 | PCP017106 | XM_009349798 |
| PCP017122 | 11,49001349 | 11,22138774 | 11,21249639 | 11,05234389 | PCP017122 | XM_009345705 |
| PCP017143 | 8,939579214 | 8,67479253  | 9,071462363 | 9,505156537 | PCP017143 | XM_009354248 |
| PCP017148 | 10,84549005 | 10,72308921 | 10,84339505 | 10,82681063 |           |              |
| PCP017158 | 10,2463487  | 10,32117274 | 10,36120908 | 10,833151   | PCP017158 | XM_009369880 |
| PCP017166 | 9,672425342 | 9,720534991 | 9,64385619  | 9,961927137 | PCP017166 | XM_009356442 |
| PCP017183 | 9,131008067 | 9,06608919  | 9,375039431 | 9,285402219 | PCP017183 | XM_018651648 |
| PCP017219 | 9,625708843 | 9,869855987 | 9,346513733 | 8,209453366 |           |              |
| PCP017220 | 11,84901407 | 11,95152879 | 12,0665366  | 11,92864051 | PCP017220 | XM_009361932 |
| PCP017232 | 9,609788199 | 9,501837185 | 9,303780748 | 8,743723645 | PCP017232 | XM_009371923 |
| PCP017237 | 9,072347016 | 9,25502857  | 9,324923085 | 9,713678633 |           |              |
| PCP017265 | 10,90036117 | 10,72678865 | 10,80681542 | 10,79007965 | PCP017265 | XM_009343309 |
| PCP017287 | 14,13752514 | 14,06513588 | 13,90488577 | 13,61455687 |           |              |
| PCP017297 | 11,19290922 | 11,24555271 | 11,23541594 | 11,2524703  |           |              |
| PCP017315 | 9,531381461 | 9,204571144 | 9,055282436 | 8,80196697  | PCP017315 | XM_008371311 |
| PCP017317 | 10,04028972 | 10,54464573 | 10,52715442 | 11,08015131 |           |              |
| PCP017318 | 10,10721708 | 10,08304047 | 10,48280796 | 10,70505347 | PCP017318 | XM_018648700 |
| PCP017338 | 10,89051509 | 10,99387953 | 11,06317259 | 11,01982004 | PCP017338 | XM_008357736 |
| PCP017352 | 11,11612949 | 11,27204652 | 11,57159623 | 12,09879864 | PCP017352 | XM_009376302 |
| PCP017414 | 9,796575043 | 9,84497247  | 9,848106482 | 9,813781191 | PCP017414 | XM_009376191 |
| PCP017436 | 8,942514505 | 8,842350343 | 9,169925001 | 9,505811554 |           |              |
| PCP017447 | 9,243173983 | 9,28925812  | 9,372146798 | 9,258165557 | PCP017447 | NM_001302323 |
| PCP017457 | 10,05301628 | 10,02375435 | 10,31816994 | 11,04143329 |           |              |
| PCP017494 | 11,18156848 | 10,78653919 | 10,55906156 | 10,31929955 | PCP017494 | XM_008379527 |
| PCP017504 | 12,30947635 | 11,8264174  | 11,56906286 | 11,39142083 | PCP017504 | XM_009380445 |
| PCP017507 | 11,35388012 | 11,43653978 | 11,43862034 | 11,04280163 | PCP017507 | XM_018647237 |
| PCP017519 | 9,925806611 | 10,31703945 | 10,37395266 | 10,46760555 |           |              |
| PCP017533 | 9,462154593 | 9,558420713 | 10,07948478 | 11,39178061 | PCP017533 | XM_009355415 |
| PCP017590 | 9,037080165 | 9,094526396 | 9,19063955  | 8,721099189 | PCP017590 | XM_008373343 |
| PCP017600 | 11,32717648 | 10,94763694 | 10,65791684 | 10,82708066 | PCP017600 | XM_018652266 |
| PCP017611 | 11,52127162 | 11,52028964 | 11,60594244 | 11,94153552 | PCP017611 | XM_008384851 |
| PCP017690 | 10,32979634 | 10,18982456 | 10,22077734 | 10,04530918 | PCP017690 | XM_008366547 |
| PCP017748 | 9,437398376 | 9,419960178 | 9,753216749 | 10,19475685 |           |              |
| PCP017754 | 10,02190996 | 10,21714588 | 9,804131021 | 9,661778098 | PCP017754 | XM_009346388 |
| PCP017774 | 9,408690635 | 9,226412193 | 9,268354853 | 9,019590728 | PCP017774 | XM_009371517 |
| PCP017785 | 9,753216749 | 9,669469742 | 9,862125893 | 10,12454785 | PCP017785 | XM_009371500 |
| PCP017787 | 9,230428801 | 9,286164981 | 8,792237182 | 8,199672345 | PCP017787 | XM_009371497 |
| PCP017818 | 9,895832748 | 9,950308015 | 10,01262454 | 9,974887762 | PCP017818 | XM_009371452 |
| PCP017822 | 8,721099189 | 8,730198386 | 8,939579214 | 9,200481794 |           |              |



|           |             |             |             |             |           |              |
|-----------|-------------|-------------|-------------|-------------|-----------|--------------|
| PCP017827 | 13,15407917 | 12,72742487 | 12,88410754 | 13,22208998 |           |              |
| PCP017835 | 9,142107057 | 9,259743264 | 8,991521846 | 9,439477697 | PCP017835 | XM_009353982 |
| PCP017838 | 13,41256985 | 13,43423727 | 13,47231006 | 13,86053706 | PCP017838 | XM_009353977 |
| PCP017858 | 9,048023611 | 8,966736149 | 9,020507757 | 9,016808288 | PCP017858 | XM_009353949 |
| PCP017860 | 9,11113567  | 9,048949988 | 9,079484784 | 9,456005251 | PCP017860 | XM_009353948 |
| PCP017864 | 11,33017182 | 11,12326139 | 11,2805794  | 11,57127862 |           |              |
| PCP017877 | 9,371406396 | 9,401583539 | 9,414325838 | 9,356826076 | PCP017877 | NM_001328903 |
| PCP017896 | 8,700439718 | 8,714245518 | 9,269126679 | 9,779177627 | PCP017896 | XM_009347269 |
| PCP017906 | 9,622655867 | 9,330177419 | 8,897845456 | 8,113742166 | PCP017906 | XM_009362362 |
| PCP017907 | 9,385862401 | 9,50249371  | 9,754336368 | 10,05754504 | PCP017907 | XM_009361771 |
| PCP017911 | 11,85901834 | 11,91724899 | 11,92159179 | 11,9009913  | PCP017911 | XM_008386023 |
| PCP017928 | 9,815383296 | 9,36047402  | 9,463524373 | 9,075933681 | PCP017928 | XM_009359330 |
| PCP017936 | 8,900866808 | 8,970594857 | 9,324923085 | 9,703903573 | PCP017936 | XM_009340785 |
| PCP017938 | 9,354624059 | 9,315896762 | 9,528786176 | 9,759888183 | PCP017938 | XM_018649155 |
| PCP017940 | 9,54689446  | 9,423473125 | 9,428360173 | 9,315149562 | PCP017940 | XM_009341468 |
| PCP017977 | 10,71881539 | 10,72052644 | 10,96048709 | 10,8960826  |           |              |
| PCP017989 | 10,41222051 | 10,41468524 | 10,34466208 | 10,5372184  | PCP017989 | XR_001954281 |
| PCP017995 | 9,701011827 | 9,609178738 | 9,911391988 | 9,968191576 |           |              |
| PCP018010 | 11,36741475 | 11,29270699 | 11,50382574 | 11,7396414  | PCP018010 | XR_001953854 |
| PCP018041 | 11,9684256  | 11,90199819 | 12,12896095 | 12,66133275 | PCP018041 | XM_008363765 |
| PCP018052 | 10,44535633 | 10,32268306 | 10,58371275 | 10,3858624  | PCP018052 | XM_018650943 |
| PCP018057 | 9,650459419 | 9,546257836 | 9,522248035 | 9,466932951 |           |              |
| PCP018065 | 10,78626963 | 10,81511907 | 10,84392105 | 11,23302043 | PCP018065 | XM_009339222 |
| PCP018076 | 9,884674229 | 10,34021731 | 10,44948916 | 10,8587581  |           |              |
| PCP018082 | 9,895317771 | 9,858493931 | 9,969631147 | 10,31477582 |           |              |
| PCP018103 | 8,710806434 | 8,636624621 | 8,912889336 | 9,153121312 |           |              |
| PCP018105 | 13,4043872  | 13,5156173  | 13,38698469 | 14,03714625 | PCP018105 | XR_001952838 |
| PCP018112 | 9,161560218 | 9,052568051 | 9,198862442 | 9,130132926 | PCP018112 | XM_009378974 |
| PCP018135 | 9,533972085 | 9,479780264 | 9,772034091 | 10,05256805 |           |              |
| PCP018150 | 10,67830963 | 10,57711722 | 10,67065625 | 11,24634276 |           |              |
| PCP018181 | 8,856954575 | 8,901862467 | 8,739206792 | 8,828676005 | PCP018181 | XM_009362853 |
| PCP018182 | 9,033423002 | 9,265216522 | 9,276892087 | 9,591840209 | PCP018182 | XM_009362849 |
| PCP018183 | 10,00796633 | 10,20579325 | 10,53656778 | 10,99293834 | PCP018183 | XM_009362852 |
| PCP018217 | 8,73809226  | 9,079484784 | 8,899870461 | 8,83709175  | PCP018217 | XM_009356958 |
| PCP018223 | 10,27961058 | 9,843402907 | 9,915879379 | 10,21674586 | PCP018223 | XM_009356973 |
| PCP018242 | 8,876516947 | 8,851749041 | 8,899870461 | 8,795487741 | PCP018242 | XM_008369155 |
| PCP018259 | 9,207819661 | 9,198862442 | 9,13442632  | 9,20701432  | PCP018259 | XM_009370017 |
| PCP018267 | 9,410811715 | 9,424166289 | 9,514378734 | 9,855382427 | PCP018267 | XM_009370028 |
| PCP018285 | 10,64955259 | 10,34614803 | 10,43010752 | 10,52061868 |           |              |
| PCP018290 | 11,28289729 | 11,22339841 | 11,72352017 | 11,48465677 | PCP018290 | XM_008378962 |
| PCP018291 | 10,05619061 | 9,958552715 | 10,2617071  | 10,41397693 | PCP018291 | XM_008358920 |
| PCP018293 | 13,85327739 | 13,88753765 | 13,95022143 | 13,87325184 | PCP018293 | XM_009337351 |
| PCP018315 | 10,76791131 | 10,64595559 | 10,52519778 | 10,45327063 |           |              |
| PCP018329 | 9,752664976 | 9,718823954 | 9,472345607 | 9,815383296 |           |              |
| PCP018343 | 9,152284842 | 9,08127038  | 9,086587411 | 9,511100329 |           |              |
| PCP018357 | 9,14890869  | 8,976334992 | 9,089238597 | 9,466932951 | PCP018357 | XM_009338813 |

|           |             |             |             |             |           |              |
|-----------|-------------|-------------|-------------|-------------|-----------|--------------|
| PCP018360 | 9,593708574 | 9,68707819  | 9,626311362 | 9,56732868  | PCP018360 | XM_009338810 |
| PCP018364 | 9,619614757 | 9,728481771 | 9,901364723 | 9,77807713  | PCP018364 | XM_009365164 |
| PCP018366 | 11,60300964 | 11,64865867 | 11,84718657 | 12,04939593 |           |              |
| PCP018381 | 11,1372025  | 10,97489493 | 11,29825163 | 11,60779264 | PCP018381 | XM_009369341 |
| PCP018382 | 13,24406646 | 13,26781082 | 13,4192584  | 13,73085963 |           |              |
| PCP018424 | 8,553322101 | 8,732438807 | 8,968666793 | 9,112882543 |           |              |
| PCP018453 | 10,09054913 | 9,806823474 | 10,04257594 | 9,810571635 |           |              |
| PCP018454 | 9,694653884 | 9,740337332 | 9,853824155 | 9,762099618 | PCP018454 | XM_009374392 |
| PCP018456 | 10,78108918 | 10,46726929 | 10,70707436 | 11,05166439 | PCP018456 | XM_009374389 |
| PCP018468 | 9,078604498 | 9,072347016 | 8,877529547 | 9,563520437 |           |              |
| PCP018483 | 9,553955615 | 9,497851837 | 9,589969422 | 9,220789431 | PCP018483 | XM_009339513 |
| PCP018526 | 9,013099307 | 9,043492153 | 8,941546519 | 8,940548521 | PCP018526 | XM_009379531 |
| PCP018528 | 9,326429487 | 9,412929682 | 9,461479447 | 9,731879027 | PCP018528 | XM_009361208 |
| PCP018535 | 10,83025374 | 10,96914905 | 10,97154355 | 10,97561156 | PCP018535 | XM_009361226 |
| PCP018536 | 8,677120596 | 8,707359132 | 8,85277917  | 9,476401941 | PCP018536 | XM_009361224 |
| PCP018547 | 9,894317583 | 9,86469688  | 9,864186145 | 9,878050913 | PCP018547 | XM_009336798 |
| PCP018551 | 9,716527978 | 9,82707272  | 10,23720996 | 10,47742436 |           |              |
| PCP018559 | 9,436024381 | 8,899870461 | 8,885696373 | 8,390899794 |           |              |
| PCP018588 | 11,07258149 | 11,07280253 | 11,25345161 | 11,53300358 | PCP018588 | XM_008379382 |
| PCP018592 | 8,762647796 | 8,761551232 | 8,97441459  | 9,599912842 |           |              |
| PCP018596 | 10,86418614 | 10,88315493 | 10,98489548 | 10,93147623 | PCP018596 | XM_009380992 |
| PCP018613 | 9,968666793 | 9,879077758 | 9,713094337 | 9,19802752  | PCP018613 | XM_018648240 |
| PCP018617 | 10,79982395 | 10,64775521 | 10,6694786  | 10,85642553 |           |              |
| PCP018636 | 10,77204234 | 10,95927751 | 11,2628759  | 11,49385545 | PCP018636 | XM_009375251 |
| PCP018637 | 9,799281622 | 9,792253453 | 9,986311377 | 9,857467877 | PCP018637 | XM_018651229 |
| PCP018649 | 9,105908509 | 9,176597042 | 9,243959396 | 9,187352073 | PCP018649 | XM_009343607 |
| PCP018656 | 9,365600686 | 9,086587411 | 9,226412193 | 8,84024291  |           |              |
| PCP018661 | 9,795503976 | 9,892284763 | 10,14252831 | 11,0409746  |           |              |
| PCP018662 | 11,74244839 | 11,26052559 | 11,65597786 | 11,89190898 |           |              |
| PCP018707 | 9,146365017 | 9,046223651 | 10,66562905 | 11,05956754 |           |              |
| PCP018709 | 9,02699366  | 9,251884747 | 9,479113318 | 9,836571147 | PCP018709 | XM_008367695 |
| PCP018714 | 11,11547938 | 10,93393403 | 11,14656868 | 11,41960736 | PCP018714 | XM_009345685 |
| PCP018721 | 9,095397023 | 9,080364533 | 9,243173983 | 9,688250309 |           |              |
| PCP018730 | 9,282323962 | 9,333893285 | 9,336127147 | 9,215945486 | PCP018730 | XM_009336296 |
| PCP018734 | 12,74237892 | 12,7077905  | 12,81090697 | 12,7322374  | PCP018734 | XM_009367140 |
| PCP018747 | 10,37359384 | 10,39839099 | 10,4419067  | 10,74846962 | PCP018747 | XM_018644209 |
| PCP018766 | 9,805743872 | 9,692319087 | 9,755438426 | 10,29462075 | PCP018766 | XM_008387204 |
| PCP018774 | 9,087462841 | 9,057991723 | 9,131856961 | 9,000929563 | PCP018774 | XM_008379808 |
| PCP018781 | 9,405843489 | 9,393025715 | 9,729620744 | 9,30833903  |           |              |
| PCP018798 | 10,56826967 | 10,68533575 | 10,60146439 | 10,54592977 | PCP018798 | XM_009381121 |
| PCP018811 | 8,336863563 | 8,661778098 | 9,05709822  | 9,46760555  | PCP018811 | XM_009338146 |
| PCP018823 | 11,14550551 | 11,15101654 | 11,30359241 | 11,22057785 | PCP018823 | XM_008342956 |
| PCP018845 | 8,819125283 | 8,887738491 | 8,910882535 | 9,50118036  |           |              |
| PCP018852 | 10,37322406 | 10,48616127 | 10,45532722 | 10,53495453 | PCP018852 | XM_009377933 |
| PCP018870 | 12,47893895 | 12,5533101  | 12,4482015  | 12,39151212 | PCP018870 | XM_009355890 |
| PCP018876 | 10,48984796 | 10,43532647 | 10,5526691  | 11,01471793 | PCP018876 | XM_009361581 |

|           |             |             |             |             |           |              |
|-----------|-------------|-------------|-------------|-------------|-----------|--------------|
| PCP018886 | 9,910897522 | 10,04939934 | 10,27922751 | 10,833151   | PCP018886 | XM_009335941 |
| PCP018909 | 9,058884672 | 9,054387253 | 9,02699366  | 8,967716202 | PCP018909 | XR_001954674 |
| PCP018912 | 9,873951581 | 9,897845456 | 9,817511342 | 10,13570929 | PCP018912 | XM_009370484 |
| PCP018944 | 10,81618368 | 10,5143886  | 10,33352436 | 10,16154762 | PCP018944 | XM_018645961 |
| PCP018948 | 10,00422047 | 10,55458885 | 10,85564717 | 11,55203021 |           |              |
| PCP018963 | 10,95177282 | 10,2199792  | 10,48482289 | 10,5307282  | PCP018963 | XM_018645714 |
| PCP018969 | 9,011227255 | 9,040755473 | 9,275356315 | 9,691167722 | PCP018969 | XM_008356302 |
| PCP019004 | 8,668884984 | 8,998110862 | 9,114601277 | 9,609788199 | PCP019004 | XM_009336610 |
| PCP019009 | 10,53786873 | 10,47438534 | 10,64505493 | 10,93245838 |           |              |
| PCP019076 | 9,089238597 | 9,105908509 | 9,561612539 | 10,09364204 | PCP019076 | XM_008385562 |
| PCP019095 | 9,159038773 | 9,094526396 | 9,091884919 | 9,08127038  |           |              |
| PCP019173 | 14,22972009 | 13,0760924  | 13,45763738 | 12,89904153 | PCP019173 | XM_008385924 |
| PCP019195 | 9,00750388  | 9,113742166 | 9,33315535  | 9,786269628 |           |              |
| PCP019253 | 10,23521247 | 10,18818083 | 10,89658217 | 10,76597392 |           |              |
| PCP019277 | 9,330916878 | 9,195569065 | 9,352418676 | 9,616548844 | PCP019277 | XM_008379925 |
| PCP019290 | 9,654045226 | 9,651051691 | 9,73470962  | 9,601770788 |           |              |
| PCP019300 | 13,24495839 | 12,90224885 | 12,85759229 | 13,17539361 | PCP019300 | XM_009360205 |
| PCP019301 | 10,06249143 | 10,06474276 | 10,16364968 | 10,45052051 | PCP019301 | XM_009360204 |
| PCP019312 | 12,35700209 | 12,04814625 | 12,10612778 | 11,82588498 | PCP019312 | XM_009360184 |
| PCP019318 | 12,48137816 | 12,38891331 | 12,57538088 | 12,95546829 |           |              |
| PCP019321 | 10,99246397 | 11,19660213 | 11,20904511 | 11,45635442 | PCP019321 | XM_008369525 |
| PCP019322 | 10,3527828  | 10,37395266 | 10,54721267 | 10,85356688 |           |              |
| PCP019323 | 10,61256445 | 10,61900026 | 10,74959293 | 11,10153584 | PCP019323 | XM_009360156 |
| PCP019338 | 10,59525748 | 10,55554777 | 10,75182019 | 11,10546987 |           |              |
| PCP019339 | 9,285402219 | 9,294620749 | 9,255807556 | 9,637838439 |           |              |
| PCP019351 | 11,51405813 | 11,54512376 | 11,48213737 | 11,76873433 | PCP019351 | XM_009372514 |
| PCP019353 | 9,510427928 | 9,417852515 | 9,700439718 | 9,408690635 |           |              |
| PCP019367 | 11,05912135 | 11,34318572 | 11,62174512 | 11,891404   |           |              |
| PCP019373 | 8,792237182 | 8,903881846 | 8,833933692 | 9,433940073 |           |              |
| PCP019416 | 13,18941226 | 12,56811526 | 12,41565463 | 11,67815996 | PCP019416 | XM_009377170 |
| PCP019418 | 11,26404962 | 10,11504365 | 10,91886324 | 11,03732044 | PCP019418 | XM_009377173 |
| PCP019445 | 10,36084708 | 10,42906146 | 10,51142653 | 10,77698401 | PCP019445 | XM_009339373 |
| PCP019446 | 8,917879246 | 8,874458871 | 9,053464362 | 8,955155849 | PCP019446 | XM_009339353 |
| PCP019449 | 9,767638247 | 9,936152052 | 9,703903573 | 9,633594681 | PCP019449 | XM_018643178 |
| PCP019461 | 9,730758817 | 9,799281622 | 9,705062108 | 9,662970945 | PCP019461 | XM_009339105 |
| PCP019484 | 9,367043381 | 9,133578937 | 9,413627929 | 9,192292814 |           |              |
| PCP019486 | 9,068778278 | 9,164906927 | 9,522248035 | 10,14040802 | PCP019486 | XM_009377659 |
| PCP019496 | 9,484480553 | 9,573647187 | 9,595574522 | 9,985372344 | PCP019496 | XM_009377640 |
| PCP019517 | 10,12153352 | 10,11547288 | 10,63026713 | 11,15101654 | PCP019517 | XM_008378869 |
| PCP019521 | 15,50965131 | 15,31455952 | 15,38783795 | 15,25355206 | PCP019521 | NM_001328803 |
| PCP019545 | 10,11851287 | 10,06114164 | 10,75544677 | 11,24476222 | PCP019545 | XM_017334000 |
| PCP019555 | 10,57774037 | 10,3383687  | 10,29424165 | 10,35938719 | PCP019555 | XM_008370322 |
| PCP019572 | 8,994353437 | 9,125852541 | 8,939579214 | 8,905898402 | PCP019572 | XM_008370568 |
| PCP019596 | 8,813781191 | 8,809510912 | 8,908902953 | 9,244768161 |           |              |
| PCP019615 | 12,72905349 | 12,73612072 | 12,84529402 | 12,76459588 |           |              |
| PCP019619 | 12,6071754  | 12,49493806 | 12,32418055 | 12,62357747 | PCP019619 | XM_018649575 |

|           |             |             |             |             |           |              |
|-----------|-------------|-------------|-------------|-------------|-----------|--------------|
| PCP019641 | 11,60501645 | 11,78803719 | 11,87023755 | 12,09627701 | PCP019641 | XM_008352363 |
| PCP019651 | 10,48515509 | 10,6435586  | 10,65314065 | 10,47269084 | PCP019651 | XR_526443    |
| PCP019657 | 10,22520744 | 10,35240764 | 10,47370575 | 10,39588754 | PCP019657 | XR_670338    |
| PCP019666 | 10,16867212 | 10,49951706 | 11,02283245 | 11,41609553 | PCP019666 | XM_018652402 |
| PCP019670 | 9,159871337 | 9,203763987 | 9,2589664   | 9,615316973 |           |              |
| PCP019674 | 10,40016431 | 10,38873845 | 10,57490568 | 10,85953479 | PCP019674 | XM_021969724 |
| PCP019678 | 9,458057945 | 9,472345607 | 9,607330314 | 9,994353437 |           |              |
| PCP019687 | 12,68189723 | 12,70570366 | 12,6959525  | 12,5049009  | PCP019687 | XM_009357531 |
| PCP019722 | 11,78599593 | 10,99647349 | 11,4236412  | 11,44931891 | PCP019722 | XM_009372996 |
| PCP019724 | 11,43375755 | 11,07392063 | 11,37467545 | 10,9331964  | PCP019724 | XM_009372993 |
| PCP019748 | 9,38945926  | 9,440183984 | 9,539798574 | 9,421370591 | PCP019748 | XM_018645402 |
| PCP019753 | 10,46726929 | 10,59308294 | 10,73921523 | 10,98085361 | PCP019753 | XM_009360844 |
| PCP019759 | 9,498510178 | 9,560963278 | 9,703903573 | 10,22721882 | PCP019759 | XM_009360855 |
| PCP019781 | 9,717110885 | 8,962896005 | 9,414325838 | 9,719953466 |           |              |
| PCP019783 | 9,035266491 | 9,215945486 | 9,094526396 | 9,16824589  | PCP019783 | XM_009354606 |
| PCP019798 | 8,572397068 | 8,70276142  | 8,73809226  | 9,320416982 | PCP019798 | XM_009354636 |
| PCP019801 | 9,155653112 | 9,113742166 | 9,274564521 | 9,654045226 | PCP019801 | XM_009354639 |
| PCP019816 | 8,960957618 | 8,631795481 | 8,983934156 | 8,758223215 | PCP019816 | XM_009336466 |
| PCP019826 | 10,67977037 | 10,34170783 | 10,29844067 | 10,20579325 | PCP019826 | XM_009336440 |
| PCP019830 | 9,330916878 | 9,197216693 | 9,859534786 | 10,63934071 | PCP019830 | XM_009335627 |
| PCP019831 | 10,83736775 | 10,47201045 | 10,98037525 | 11,48900999 | PCP019831 | XM_009335629 |
| PCP019838 | 9,442259297 | 9,528786176 | 9,667697019 | 10,23999226 | PCP019838 | XM_009335557 |
| PCP019847 | 8,764871591 | 8,915879379 | 9,059804103 | 9,392317423 | PCP019847 | XM_008375764 |
| PCP019850 | 8,816983623 | 8,846524657 | 8,979196518 | 9,271463028 | PCP019850 | XM_008375760 |
| PCP019856 | 9,163221961 | 9,135273206 | 9,371406396 | 9,613476402 |           |              |
| PCP019882 | 9,399448837 | 9,369968059 | 9,385150582 | 9,374322251 | PCP019882 | XM_009368975 |
| PCP019895 | 9,269898093 | 9,082149041 | 9,182394353 | 8,975360779 | PCP019895 | XM_009381200 |
| PCP019898 | 8,893817229 | 8,806291831 | 9,01402047  | 9,236803511 | PCP019898 | XM_009381196 |
| PCP019925 | 9,775890069 | 9,267559206 | 9,797661526 | 9,425572598 |           |              |
| PCP019929 | 8,951284715 | 9,022367813 | 8,939579214 | 8,831845581 | PCP019929 | XM_009370184 |
| PCP019949 | 9,558420713 | 9,012149614 | 9,486493158 | 9,124974266 | PCP019949 | XM_018649528 |
| PCP019956 | 9,30833903  | 8,906890596 | 9,086587411 | 8,905898402 |           |              |
| PCP019968 | 9,19063955  | 9,618991087 | 9,73753467  | 11,19741944 | PCP019968 | XM_009346732 |
| PCP019994 | 9,721663165 | 9,742595757 | 9,805743872 | 10,17158965 |           |              |
| PCP019997 | 9,997645247 | 9,363412032 | 9,73809226  | 9,140395236 | PCP019997 | XM_009364001 |
| PCP020015 | 10,5943246  | 10,58714931 | 10,66651695 | 11,21735191 | PCP020015 | XM_018646931 |
| PCP020016 | 9,451891079 | 9,513727596 | 9,524874682 | 9,873444113 | PCP020016 | XM_008385223 |
| PCP020025 | 9,217545787 | 9,191478757 | 9,324180547 | 9,612868497 | PCP020025 | XM_008382293 |
| PCP020027 | 11,51191569 | 11,6249462  | 11,68576936 | 11,68576936 | PCP020027 | XM_008382298 |
| PCP020044 | 9,390168956 | 9,514378734 | 9,759888183 | 10,47505448 | PCP020044 | XM_009335417 |
| PCP020055 | 11,08768162 | 10,90137227 | 11,43393486 | 12,03880585 | PCP020055 | XM_009339681 |
| PCP020056 | 9,807886174 | 9,875488276 | 9,983948403 | 10,35388563 | PCP020056 | XM_009339736 |
| PCP020058 | 10,56064809 | 10,37177664 | 10,26288177 | 9,827612638 |           |              |
| PCP020086 | 11,09319966 | 10,97775931 | 11,30701292 | 11,76914773 | PCP020086 | XM_009356593 |
| PCP020092 | 10,84444686 | 10,92332749 | 10,97249881 | 11,29710542 | PCP020092 | XM_009376135 |
| PCP020105 | 8,961941603 | 8,998110862 | 9,070577167 | 9,814854798 | PCP020105 | XM_009351878 |

|           |             |             |             |             |           |              |
|-----------|-------------|-------------|-------------|-------------|-----------|--------------|
| PCP020126 | 10,34355217 | 10,26874082 | 10,09934781 | 10,15186643 | PCP020126 | XM_009368544 |
| PCP020129 | 9,781359714 | 9,529430554 | 9,49251418  | 9,488502959 | PCP020129 | XM_009368554 |
| PCP020132 | 10,44742422 | 10,30720081 | 10,36120908 | 10,18570552 | PCP020132 | XM_008386904 |
| PCP020137 | 9,383704292 | 9,489185654 | 9,379378367 | 10,50845837 |           |              |
| PCP020138 | 14,65476635 | 15,12286843 | 15,40659267 | 15,92101966 |           |              |
| PCP020143 | 9,806275718 | 9,641455713 | 9,867788381 | 10,47099435 | PCP020143 | XM_009378188 |
| PCP020156 | 8,780277286 | 8,73470962  | 8,84862294  | 9,177419538 |           |              |
| PCP020157 | 10,42940674 | 10,29844067 | 10,4415644  | 10,15186643 |           |              |
| PCP020171 | 10,96674336 | 10,91488588 | 10,95855272 | 10,75933063 |           |              |
| PCP020174 | 12,59346816 | 12,35351352 | 12,20965745 | 12,50696951 | PCP020174 | XM_009361980 |
| PCP020190 | 11,23481743 | 11,27670602 | 11,38009845 | 11,27068661 | PCP020190 | XM_009344688 |
| PCP020191 | 9,312882955 | 9,447083226 | 9,439477697 | 9,780818601 | PCP020191 | XM_018644424 |
| PCP020224 | 10,17825402 | 10,28924659 | 10,51897765 | 11,09737377 | PCP020224 | XM_009349570 |
| PCP020228 | 10,91811785 | 10,66562905 | 10,7851827  | 10,87036472 | PCP020228 | XM_009346705 |
| PCP020240 | 10,43844881 | 10,42661071 | 10,58402294 | 11,05505869 | PCP020240 | XM_009356808 |
| PCP020247 | 9,336885873 | 9,148044344 | 8,658211483 | 9,40017499  | PCP020247 | XM_008373650 |
| PCP020248 | 8,759322309 | 8,545620932 | 8,84024291  | 9,220789431 |           |              |
| PCP020256 | 9,996713565 | 10,45327063 | 10,48616127 | 10,83788807 |           |              |
| PCP020285 | 11,44363255 | 11,48230378 | 11,64865867 | 11,87741068 |           |              |
| PCP020292 | 9,960001932 | 10,19311874 | 10,30910114 | 10,66799854 | PCP020292 | XM_009370168 |
| PCP020304 | 9,722807531 | 9,893301531 | 9,842868866 | 9,833411948 | PCP020304 | XM_009338999 |
| PCP020336 | 8,780277286 | 8,651051691 | 8,865207434 | 9,445697739 | PCP020336 | XM_008371416 |
| PCP020347 | 9,652844973 | 9,747639151 | 9,825483551 | 9,680060579 | PCP020347 | XM_009355653 |
| PCP020358 | 12,42574042 | 12,0175044  | 12,18817774 | 12,1233681  | PCP020358 | XM_009379811 |
| PCP020372 | 9,123267853 | 9,200481794 | 9,445697739 | 9,832367892 | PCP020372 | XM_009349512 |
| PCP020374 | 9,039823818 | 8,652235507 | 9,072347016 | 9,330916878 | PCP020374 | XM_009346796 |
| PCP020380 | 10,4118605  | 10,50680344 | 10,67918977 | 10,85823749 | PCP020380 | XM_009360512 |
| PCP020410 | 9,286950435 | 9,186535222 | 9,195569065 | 9,138706975 | PCP020410 | XM_009360470 |
| PCP020446 | 9,121533517 | 9,260519709 | 9,225617167 | 9,051671182 | PCP020446 | XM_009380456 |
| PCP020448 | 10,6489597  | 10,76901132 | 10,80332392 | 10,62113611 | PCP020448 | XM_009380449 |
| PCP020452 | 9,719953466 | 9,55522181  | 9,581200582 | 9,547530803 |           |              |
| PCP020464 | 9,061587209 | 9,214319121 | 9,382991408 | 9,689421477 | PCP020464 | XM_008391410 |
| PCP020491 | 11,60501645 | 11,77409931 | 11,79319686 | 11,67198327 |           |              |
| PCP020538 | 8,857980995 | 8,924812504 | 9,039823818 | 9,361943774 | PCP020538 | XM_009348536 |
| PCP020544 | 10,83552148 | 10,89986291 | 10,87983593 | 10,53818893 | PCP020544 | XM_009341761 |
| PCP020545 | 12,707646   | 12,84143265 | 12,99888479 | 13,19419204 |           |              |
| PCP020577 | 12,38685135 | 12,05889482 | 12,17679648 | 12,32192809 | PCP020577 | XM_008391444 |
| PCP020615 | 9,695228291 | 10,04302728 | 10,1514352  | 10,68766437 |           |              |
| PCP020663 | 9,244768161 | 9,124974266 | 9,306061689 | 9,683573652 |           |              |
| PCP020749 | 10,5372184  | 10,23002044 | 10,37648358 | 10,81244207 |           |              |
| PCP020843 | 9,311362334 | 9,215945486 | 9,357552005 | 9,623277955 |           |              |
| PCP020848 | 8,832890014 | 10,48482289 | 9,479113318 | 8,462175047 | PCP020848 | XM_009336163 |
| PCP020855 | 9,578051847 | 9,554588852 | 9,908392621 | 11,81244608 |           |              |
| PCP020856 | 10,6709483  | 10,72735041 | 11,1271367  | 11,6446089  | PCP020856 | XM_009381159 |
| PCP020868 | 9,329415156 | 8,742578916 | 8,730198386 | 8,976334992 | PCP020868 | XM_009379561 |
| PCP020872 | 10,25423735 | 10,33016621 | 10,33315535 | 10,67918977 | PCP020872 | XM_009378982 |

|           |             |             |             |             |           |              |
|-----------|-------------|-------------|-------------|-------------|-----------|--------------|
| PCP020873 | 11,49918317 | 11,14189638 | 11,32867493 | 11,8753654  | PCP020873 | XM_009378653 |
| PCP020889 | 8,832890014 | 8,788979283 | 8,820178962 | 9,236803511 | PCP020889 | XM_009376551 |
| PCP020914 | 10,25187292 | 10,20783186 | 10,35204343 | 10,82151093 | PCP020914 | XM_008352581 |
| PCP020917 | 8,541754876 | 8,692336525 | 8,955155849 | 9,288473922 |           |              |
| PCP020925 | 8,969616759 | 8,947403166 | 9,131856961 | 9,422758607 |           |              |
| PCP020926 | 10,1581931  | 9,959523851 | 9,252665432 | 8,06786455  | PCP020926 | XM_008361775 |
| PCP020933 | 9,929258409 | 9,78026088  | 9,730758817 | 10,04667385 | PCP020933 | XM_008368734 |
| PCP020934 | 8,932716728 | 9,203763987 | 9,06608919  | 8,939579214 | PCP020934 | XM_008390843 |
| PCP020954 | 10,72649918 | 10,65582585 | 10,76735685 | 11,26795708 |           |              |
| PCP020956 | 10,45498809 | 10,31250862 | 10,48817153 | 10,71938882 |           |              |
| PCP020957 | 9,054387253 | 9,210257347 | 9,367043381 | 9,290018847 |           |              |
| PCP020963 | 8,744833837 | 8,901862467 | 8,895817605 | 8,86727874  | PCP020963 | XM_008390878 |
| PCP020985 | 8,863164132 | 8,758223215 | 8,98205238  | 9,202931899 | PCP020985 | XM_009375957 |
| PCP021013 | 9,382991408 | 8,97441459  | 9,16824589  | 9,039823818 | PCP021013 | XM_008341341 |
| PCP021038 | 11,69667635 | 11,53770375 | 11,5256823  | 11,39124359 | PCP021038 | XM_009353230 |
| PCP021043 | 8,857980995 | 9,207819661 | 9,346513733 | 9,898344415 | PCP021043 | XM_009353236 |
| PCP021047 | 10,65731845 | 10,68737568 | 10,86521517 | 11,45069577 |           |              |
| PCP021062 | 9,129283017 | 9,498510178 | 9,796575043 | 10,36377339 |           |              |
| PCP021064 | 9,055282436 | 9,150585062 | 9,086587411 | 9,45532722  | PCP021064 | XM_009337889 |
| PCP021066 | 11,89190898 | 11,99659    | 12,04712391 | 12,27428205 | PCP021066 | XM_009337888 |
| PCP021078 | 9,217545787 | 9,026053072 | 9,273795599 | 9,674192268 |           |              |
| PCP021098 | 8,859006685 | 8,995286644 | 8,891783703 | 8,675957033 |           |              |
| PCP021113 | 9,787902559 | 9,931727372 | 9,899356923 | 9,849670939 | PCP021113 | XM_009365481 |
| PCP021120 | 10,16616308 | 10,18652284 | 9,980139578 | 10,29039906 |           |              |
| PCP021123 | 9,746514321 | 9,009352771 | 9,064284694 | 9,470313155 |           |              |
| PCP021155 | 8,718806834 | 8,938609256 | 8,865207434 | 8,798730993 | PCP021155 | XM_009337265 |
| PCP021165 | 9,494515616 | 9,395898244 | 9,612260337 | 9,481799432 | PCP021165 | XM_009337254 |
| PCP021168 | 8,829722735 | 8,844454703 | 9,032514148 | 9,325687724 | PCP021168 | XM_009337239 |
| PCP021174 | 8,680640826 | 8,780277286 | 8,90288758  | 9,611024797 | PCP021174 | XM_009337234 |
| PCP021185 | 8,810571635 | 9,035266491 | 9,153982623 | 9,298452123 | PCP021185 | XM_009344285 |
| PCP021189 | 8,550746785 | 8,77478706  | 8,98205238  | 9,122388003 | PCP021189 | XM_009344293 |
| PCP021201 | 9,690574236 | 9,239192751 | 9,383704292 | 8,861086906 | PCP021201 | XM_008364739 |
| PCP021215 | 11,44086917 | 11,37974116 | 11,4604559  | 10,97393409 | PCP021215 | XM_008364811 |
| PCP021216 | 10,06249143 | 10,04575966 | 10,24237623 | 10,52975264 |           |              |
| PCP021237 | 8,978224236 | 8,784634846 | 8,812722827 | 9,211888295 |           |              |
| PCP021238 | 9,93516505  | 9,745959978 | 9,662365743 | 10,03572012 | PCP021238 | XM_018646514 |
| PCP021245 | 8,475733431 | 8,636624621 | 9           | 9,273026268 | PCP021245 | XM_017325138 |
| PCP021268 | 9,244768161 | 9,398038202 | 9,524874682 | 9,941531848 | PCP021268 | XM_008342360 |
| PCP021274 | 10,23401505 | 10,44224893 | 10,57080444 | 10,9186173  | PCP021274 | XM_008342368 |
| PCP021282 | 9,586220553 | 9,64385619  | 9,569229039 | 9,994820116 | PCP021282 | XM_008371445 |
| PCP021286 | 9,208648936 | 9,059804103 | 9,241578042 | 9,114601277 | PCP021286 | XM_008370110 |
| PCP021287 | 10,4807902  | 10,53915881 | 10,67330908 | 10,86056713 |           |              |
| PCP021297 | 11,17471975 | 11,2984464  | 11,15122589 | 11,14826684 |           |              |
| PCP021311 | 9,372146798 | 9,54303182  | 9,612260337 | 9,841297012 |           |              |
| PCP021313 | 8,642665475 | 8,947403166 | 9,412209922 | 10,15313398 |           |              |
| PCP021317 | 9,14890869  | 9,21916852  | 9,170751309 | 9,084808388 | PCP021317 | XM_009345554 |

|           |             |             |             |             |           |              |
|-----------|-------------|-------------|-------------|-------------|-----------|--------------|
| PCP021322 | 10,27999355 | 9,930737338 | 10,20007713 | 10,35718909 | PCP021322 | XM_009345592 |
| PCP021329 | 9,869855987 | 9,806275718 | 9,911391988 | 10,23481743 | PCP021329 | XM_009345652 |
| PCP021356 | 10,71080643 | 10,58025857 | 10,67360059 | 10,64144668 | PCP021356 | XM_008377327 |
| PCP021360 | 9,19063955  | 9,298452123 | 9,383704292 | 9,630576566 |           |              |
| PCP021362 | 13,3025918  | 13,11715606 | 13,28583566 | 13,4467822  | PCP021362 | XM_008377335 |
| PCP021367 | 10,29653771 | 10,490179   | 10,7626561  | 10,87830386 |           |              |
| PCP021370 | 8,912889336 | 9,079484784 | 9,172427509 | 9,535275377 |           |              |
| PCP021375 | 11,01842971 | 11,04871164 | 11,14656868 | 11,0622688  |           |              |
| PCP021379 | 10,4401736  | 10,50051328 | 10,70102049 | 10,8917837  | PCP021379 | XM_009347643 |
| PCP021393 | 9,475733431 | 9,351668078 | 9,441554026 | 9,361220052 | PCP021393 | XM_009335469 |
| PCP021399 | 9,984888362 | 10,10547642 | 10,10109587 | 10,46011797 |           |              |
| PCP021400 | 8,820178962 | 8,660602089 | 8,897845456 | 9,114601277 | PCP021400 | XM_009335459 |
| PCP021410 | 10,37032778 | 10,42066556 | 10,40620501 | 10,33240585 | PCP021410 | XM_009335444 |
| PCP021420 | 9,074141463 | 9,731319031 | 10,1378493  | 11,00655751 | PCP021420 | XM_009370256 |
| PCP021421 | 8,921840937 | 9,169098221 | 9,353874607 | 10,02375435 | PCP021421 | XM_009376938 |
| PCP021428 | 10,16574867 | 9,950308015 | 10,18941689 | 10,44674215 | PCP021428 | XM_008376025 |
| PCP021441 | 9,645063941 | 9,565425815 | 9,613476402 | 9,489185654 | PCP021441 | XM_017335026 |
| PCP021472 | 13,33841188 | 13,05081286 | 13,12933615 | 13,30985574 |           |              |
| PCP021473 | 9,25502857  | 9,362667132 | 9,861086906 | 10,52323849 | PCP021473 | XR_664527    |
| PCP021476 | 9,745959978 | 9,670656249 | 9,855911856 | 10,20741705 | PCP021476 | XM_009338575 |
| PCP021477 | 9,832890014 | 9,678899386 | 9,52291495  | 9,483150695 | PCP021477 | XM_008388846 |
| PCP021492 | 9,546257836 | 9,819109312 | 9,812177306 | 10,15650027 | PCP021492 | XM_009372314 |
| PCP021503 | 8,811631578 | 9,146365017 | 9,123267853 | 9,188168462 | PCP021503 | XM_009372173 |
| PCP021522 | 11,32717648 | 10,8008999  | 11,22821744 | 11,77190208 | PCP021522 | XM_008348384 |
| PCP021531 | 8,657032562 | 8,685344507 | 8,873444113 | 9,506466274 | PCP021531 | XM_008369041 |
| PCP021535 | 9,958074154 | 9,477090385 | 9,777534785 | 9,693486957 | PCP021535 | XM_018643483 |
| PCP021544 | 9,041659152 | 9,131008067 | 9,039823818 | 8,985841937 |           |              |
| PCP021566 | 9,588096205 | 9,318158642 | 9,559702114 | 9,482465137 | PCP021566 | XM_009339238 |
| PCP021600 | 9,331655958 | 9,335390355 | 9,449829585 | 9,769837844 |           |              |
| PCP021611 | 10,41785251 | 10,53267735 | 10,436368   | 10,64415371 | PCP021611 | XM_009378452 |
| PCP021626 | 9,888240957 | 10,1438041  | 10,21634573 | 10,03525274 | PCP021626 | XM_009359465 |
| PCP021650 | 8,129283017 | 8,63542792  | 10,14040802 | 9,191478757 | PCP021650 | XM_009377294 |
| PCP021654 | 9,699867382 | 9,923327485 | 9,906890596 | 9,581821975 | PCP021654 | XM_009353798 |
| PCP021657 | 9,624484772 | 9,637838439 | 9,701601036 | 9,640244936 |           |              |
| PCP021660 | 8,944477815 | 8,921840937 | 9,099794885 | 9,577428828 | PCP021660 | XM_009366681 |
| PCP021679 | 9,28925812  | 9,723370841 | 10,11156607 | 10,169925   | PCP021679 | XM_018647055 |
| PCP021687 | 9,19802752  | 9,136145235 | 9,104153166 | 9,083027168 | PCP021687 | XM_009356110 |
| PCP021705 | 10,11113567 | 10,31816994 | 10,28848546 | 10,14507876 |           |              |
| PCP021706 | 10,34503926 | 10,45976971 | 10,38010386 | 10,45771945 |           |              |
| PCP021717 | 10,67419227 | 10,516025   | 10,74118887 | 11,09627371 |           |              |
| PCP021719 | 9,334653186 | 8,767091963 | 8,851749041 | 8,770399609 | PCP021719 | XM_009351671 |
| PCP021728 | 10,58777752 | 10,87061902 | 10,98726401 | 10,75572215 | PCP021728 | XM_009368322 |
| PCP021730 | 8,120652609 | 8,913876736 | 9,323437626 | 9,282323962 | PCP021730 | XM_008354953 |
| PCP021763 | 10,44570808 | 10,3840606  | 10,38873845 | 10,34836301 | PCP021763 | XM_018647887 |
| PCP021776 | 12,13677649 | 11,89228856 | 11,99929539 | 12,22590933 | PCP021776 | XM_009366215 |
| PCP021781 | 9,192292814 | 9,288473922 | 9,388017285 | 9,760437201 |           |              |

|           |             |             |             |             |           |              |
|-----------|-------------|-------------|-------------|-------------|-----------|--------------|
| PCP021782 | 9,571126898 | 9,647458426 | 9,536577492 | 9,485829309 | PCP021782 | XM_009366226 |
| PCP021785 | 9,5980525   | 9,487176804 | 9,523561956 | 9,333893285 | PCP021785 | XM_018649207 |
| PCP021796 | 11,85901834 | 11,72465453 | 11,46250227 | 11,54222419 | PCP021796 | XM_009364856 |
| PCP021800 | 8,518338423 | 8,931712601 | 9,019590728 | 8,916864735 |           |              |
| PCP021802 | 9,357552005 | 9,171602161 | 9,28077077  | 9,234410306 |           |              |
| PCP021806 | 8,335390355 | 9,085684897 | 9,155653112 | 11,25306153 | PCP021806 | XM_008371654 |
| PCP021811 | 9,759338956 | 9,831307244 | 9,911391988 | 10,54624819 | PCP021811 | XM_009340478 |
| PCP021822 | 11,02744299 | 11,09275714 | 11,06204614 | 10,86959384 |           |              |
| PCP021824 | 8,739206792 | 8,732438807 | 8,844454703 | 9,33911511  | PCP021824 | XM_009350345 |
| PCP021832 | 10,47742436 | 10,37648358 | 10,95951661 | 11,90626304 |           |              |
| PCP021842 | 10,4101015  | 10,45704223 | 10,49485558 | 10,8008999  |           |              |
| PCP021844 | 9,153121312 | 9,172427509 | 9,17990909  | 9,008428622 |           |              |
| PCP021845 | 9,71596199  | 9,711374448 | 9,84757418  | 10,23801057 | PCP021845 | XM_008371977 |
| PCP021852 | 10,10328781 | 9,699867382 | 9,710806434 | 9,314401976 | PCP021852 | XM_008346493 |
| PCP021857 | 11,57616781 | 11,51240962 | 11,65105169 | 11,86147468 |           |              |
| PCP021874 | 13,07207732 | 13,12912199 | 13,04439412 | 13,10530781 |           |              |
| PCP021879 | 10,45463859 | 10,31477582 | 10,22077734 | 10,31552321 | PCP021879 | XM_009354260 |
| PCP021880 | 9,45532722  | 9,636624621 | 9,742595757 | 9,906890596 |           |              |
| PCP021893 | 7,781359714 | 8,501160452 | 9,061587209 | 10,39124359 | PCP021893 | XM_009345830 |
| PCP021906 | 9,750422271 | 9,854354156 | 9,894817763 | 10,34687935 |           |              |
| PCP021917 | 11,30359241 | 11,37721053 | 11,44121683 | 11,23840474 |           |              |
| PCP021921 | 9,061587209 | 8,810571635 | 9,147204925 | 9,449148645 |           |              |
| PCP021924 | 9,362667132 | 9,576163082 | 9,649848944 | 9,774243476 | PCP021924 | XM_009358394 |
| PCP021945 | 11,23381737 | 11,07235372 | 11,23999823 | 11,53462874 | PCP021945 | XM_009374936 |
| PCP021952 | 8,760453835 | 8,903881846 | 9,20537785  | 9,514378734 | PCP021952 | XM_009335434 |
| PCP021954 | 9,662365743 | 9,482465137 | 9,594324604 | 9,988684687 | PCP021954 | XM_009335436 |
| PCP021960 | 8,872428639 | 8,751544059 | 9,191478757 | 9,245552706 |           |              |
| PCP021968 | 8,727920455 | 8,366322214 | 9,155653112 | 9,266013461 | PCP021968 | XM_018645518 |
| PCP021994 | 9,345028167 | 9,405141463 | 9,479780264 | 9,839203788 | PCP021994 | XM_008375993 |
| PCP021997 | 10,3586512  | 10,04712391 | 9,675957033 | 9,451211112 |           |              |
| PCP022000 | 10,44639065 | 10,49585503 | 10,43671154 | 10,43219737 | PCP022000 | XM_009363605 |
| PCP022004 | 9,532687093 | 9,273026268 | 9,524874682 | 9,400879436 | PCP022004 | XM_008392898 |
| PCP022018 | 9,819652219 | 9,67124029  | 9,891282469 | 10,11721451 |           |              |
| PCP022024 | 9,242388143 | 9,327170869 | 9,471675214 | 9,908392621 | PCP022024 | XM_009339454 |
| PCP022048 | 12,86953023 | 13,25660234 | 13,11829223 | 13,02531262 |           |              |
| PCP022090 | 10,19065189 | 10,4129191  | 10,42486961 | 10,54913969 |           |              |
| PCP022106 | 9,055282436 | 8,856954575 | 8,949330653 | 8,992456886 | PCP022106 | XM_017331589 |
| PCP022113 | 10,05165759 | 9,994820116 | 10,02883157 | 10,63511045 | PCP022113 | XM_018652344 |
| PCP022123 | 9,82707272  | 9,855911856 | 10,04302728 | 10,50680344 |           |              |
| PCP022143 | 8,986780664 | 8,820178962 | 9,086587411 | 9,578051847 | PCP022143 | XM_009352758 |
| PCP022151 | 9,805743872 | 9,628135642 | 9,702172685 | 9,600526229 | PCP022151 | XM_009378667 |
| PCP022159 | 9,305309377 | 9,707359132 | 9,477758266 | 9,255807556 | PCP022159 | XM_018643121 |
| PCP022161 | 9,664145025 | 9,689421477 | 9,561612539 | 9,696967526 | PCP022161 | XM_008233837 |
| PCP022164 | 9,944960906 | 10,01448083 | 10,06025009 | 10,43671154 | PCP022164 | XM_018651421 |
| PCP022166 | 9,015888903 | 8,952246191 | 9,111996335 | 9,498510178 |           |              |
| PCP022172 | 10,54399845 | 10,29768437 | 10,47809209 | 10,57175264 | PCP022172 | XR_001952737 |



|           |             |             |             |             |           |              |
|-----------|-------------|-------------|-------------|-------------|-----------|--------------|
| PCP022186 | 11,70289558 | 11,82031062 | 11,92382142 | 12,08148344 | PCP022186 | XM_008364211 |
| PCP022327 | 9,320416982 | 9,383704292 | 9,125852541 | 9,305309377 | PCP022327 | XM_018644914 |
| PCP022404 | 9,064284694 | 8,932716728 | 9,015888903 | 9,003742767 |           |              |
| PCP022526 | 10,15945511 | 10,13228122 | 10,40229796 | 10,64054321 | PCP022526 | XM_009343085 |
| PCP022531 | 10,45224124 | 10,18899675 | 10,2179577  | 10,215533   | PCP022531 | XM_009355521 |
| PCP022537 | 9,494515616 | 9,22881869  | 9,429050993 | 9,266013461 |           |              |
| PCP022546 | 9,8339495   | 9,962896005 | 10,38262403 | 11,0863552  | PCP022546 | XM_009355507 |
| PCP022547 | 8,91489335  | 9,083027168 | 9,207819661 | 9,504481359 |           |              |
| PCP022553 | 9,293080746 | 9,138706975 | 9,451211112 | 9,546257836 | PCP022553 | XM_009355475 |
| PCP022554 | 10,21148681 | 10,21674586 | 10,17201489 | 10,20741705 | PCP022554 | XM_009355472 |
| PCP022568 | 9,62935662  | 9,682994584 | 9,719953466 | 9,682415283 | PCP022568 | XM_009351762 |
| PCP022573 | 8,938609256 | 8,923832563 | 8,903881846 | 9,390168956 |           |              |
| PCP022579 | 9,705062108 | 10,80197505 | 8,938609256 | 9,959031118 | PCP022579 | XM_009337215 |
| PCP022587 | 9,28000515  | 9,202123824 | 9,171602161 | 9,203763987 | PCP022587 | XM_009337261 |
| PCP022594 | 12,66029234 | 12,57546125 | 12,58488501 | 12,46675711 | PCP022594 | XM_009337351 |
| PCP022613 | 10,31741261 | 10,41855893 | 10,61256445 | 10,94982671 | PCP022613 | XM_009337617 |
| PCP022614 | 12,46335322 | 12,27941616 | 12,49685378 | 12,77917147 | PCP022614 | XM_009337598 |
| PCP022617 | 10,53689798 | 10,28578365 | 10,54399845 | 10,53430288 |           |              |
| PCP022634 | 9,460107723 | 9,415044544 | 9,385862401 | 9,339850003 | PCP022634 | XM_018647277 |
| PCP022637 | 8,75598914  | 9,023283079 | 9,145499145 | 9,436024381 |           |              |
| PCP022658 | 10,88620717 | 10,72792045 | 10,6709483  | 10,64925618 |           |              |
| PCP022660 | 8,9905862   | 8,835008208 | 8,997179481 | 9,37721053  |           |              |
| PCP022685 | 8,917879246 | 9,002815016 | 9,124121312 | 9,789533645 | PCP022685 | XR_001954829 |
| PCP022710 | 10,19105921 | 10,25148241 | 10,14338321 | 10,34170783 | PCP022710 | XM_008355136 |
| PCP022713 | 9,332417038 | 9,321928095 | 9,749869427 | 10,4841482  | PCP022713 | XM_009338182 |
| PCP022760 | 10,46794173 | 10,03204573 | 10,30263892 | 9,943496494 | PCP022760 | XM_018643576 |
| PCP022763 | 10,39732167 | 10,26248249 | 10,5849625  | 10,99976752 | PCP022763 | XM_008388186 |
| PCP022778 | 9,449148645 | 9,242388143 | 9,572378118 | 9,642051693 | PCP022778 | XM_017328894 |
| PCP022787 | 9,037080165 | 9,35974956  | 8,967716202 | 9,461479447 | PCP022787 | XM_009339364 |
| PCP022819 | 10,19475685 | 9,498510178 | 9,63540978  | 9,314401976 |           |              |
| PCP022826 | 9,348728154 | 9,188168462 | 9,000929563 | 8,869347076 | PCP022826 | XM_009346332 |
| PCP022827 | 9,850702552 | 9,92381771  | 10,05392588 | 10,41925445 | PCP022827 | XM_009346323 |
| PCP022830 | 14,42757475 | 14,17086395 | 13,98684909 | 14,27236224 |           |              |
| PCP022837 | 10,10809315 | 9,814310082 | 9,97441459  | 10,22360355 |           |              |
| PCP022851 | 11,52780441 | 11,00398866 | 10,98845037 | 11,16407098 | PCP022851 | XM_009346078 |
| PCP022853 | 10,65224447 | 10,3527828  | 10,18570552 | 10,48146646 | PCP022853 | XM_009346029 |
| PCP022854 | 9,266786541 | 8,995286644 | 8,792237182 | 8,868297843 | PCP022854 | XM_009346040 |
| PCP022865 | 8,554588852 | 8,705044823 | 9,001886668 | 9,604238155 | PCP022865 | XM_008355302 |
| PCP022886 | 9,475733431 | 9,414325838 | 9,408690635 | 9,356826076 |           |              |
| PCP022892 | 9,769292392 | 9,77807713  | 9,979182225 | 10,4419067  | PCP022892 | XM_008374978 |
| PCP022894 | 8,835008208 | 9,1807297   | 9,307587905 | 9,522248035 | PCP022894 | XM_009368075 |
| PCP022930 | 10,1476247  | 10,15059775 | 10,39802751 | 10,5943246  |           |              |
| PCP022939 | 10,35571448 | 10,3140167  | 10,42906146 | 10,76845729 |           |              |
| PCP022952 | 9,99859043  | 9,835529375 | 10,17533747 | 10,31023786 | PCP022952 | XM_009367929 |
| PCP022953 | 9,433230722 | 9,068778278 | 9,225617167 | 9,505156537 | PCP022953 | XM_009367921 |
| PCP022959 | 9,915386449 | 9,974887762 | 9,996713565 | 10,02468259 | PCP022959 | XM_009367906 |

|           |             |             |             |             |           |              |
|-----------|-------------|-------------|-------------|-------------|-----------|--------------|
| PCP022963 | 11,15228484 | 11,41802651 | 11,37847369 | 11,59851781 | PCP022963 | XM_009367893 |
| PCP022964 | 12,96253456 | 12,58980795 | 12,75175325 | 12,57285889 | PCP022964 | NM_001328820 |
| PCP022985 | 10,01820018 | 10,39518065 | 10,58777752 | 10,80063301 |           |              |
| PCP022986 | 9,962896005 | 9,892284763 | 9,775330438 | 9,478425839 |           |              |
| PCP023012 | 9,77807713  | 9,562242424 | 9,605479518 | 9,671841781 | PCP023012 | XM_008376567 |
| PCP023043 | 9,571126898 | 9,471675214 | 9,527477006 | 9,978710459 | PCP023043 | XM_009378085 |
| PCP023046 | 12,85168463 | 12,93030676 | 13,11347033 | 13,52278625 |           |              |
| PCP023057 | 9,913891691 | 10,01168851 | 10,02606691 | 10,0370939  |           |              |
| PCP023065 | 10,23601419 | 10,05572982 | 10,08347933 | 10,05979059 |           |              |
| PCP023077 | 9,426264755 | 9,646252679 | 10,00235092 | 10,61746747 | PCP023077 | XM_008367925 |
| PCP023078 | 9,262870027 | 9,225617167 | 9,543669869 | 9,503825738 |           |              |
| PCP023081 | 9,20537785  | 9,153982623 | 9,078604498 | 9,411510988 |           |              |
| PCP023095 | 11,55506839 | 11,3705076  | 11,34614249 | 11,40567333 | PCP023095 | XR_001953634 |
| PCP023100 | 9,966750567 | 10,03296865 | 10,36011184 | 10,63087684 |           |              |
| PCP023120 | 10,31741261 | 9,860574891 | 10,25777675 | 10,40479032 | PCP023120 | NM_001294044 |
| PCP023142 | 10,60547952 | 10,30947635 | 9,972505988 | 10,15566576 | PCP023142 | XM_018643388 |
| PCP023146 | 9,912889336 | 9,770383089 | 9,762664404 | 9,913891691 | PCP023146 | XM_009340122 |
| PCP023148 | 9,852264198 | 9,815383296 | 10,07369975 | 10,306825   | PCP023148 | XM_009340120 |
| PCP023149 | 11,40247917 | 11,42433953 | 11,35810171 | 11,51389041 | PCP023149 | XM_009340118 |
| PCP023164 | 9,219967107 | 9,203763987 | 9,397310972 | 9,656424863 | PCP023164 | XM_009356064 |
| PCP023197 | 9,903881846 | 10,10459875 | 10,38513979 | 11,11525828 |           |              |
| PCP023210 | 9,189009107 | 9,21916852  | 9,303027245 | 8,95419631  |           |              |
| PCP023216 | 10,9427564  | 10,69841818 | 10,78408678 | 10,7428736  |           |              |
| PCP023237 | 9,178241565 | 8,920858975 | 8,77478706  | 8,925791779 | PCP023237 | XM_017334664 |
| PCP023242 | 10,28231238 | 9,305309377 | 9,120678526 | 9,658211483 | PCP023242 | XM_008367335 |
| PCP023245 | 11,02005626 | 10,83762793 | 10,85772446 | 11,12498073 | PCP023245 | XM_008359766 |
| PCP023246 | 9,380093039 | 9,699867382 | 9,943496494 | 10,35571448 | PCP023246 | XM_007216948 |
| PCP023247 | 8,957102042 | 8,97441459  | 9,013099307 | 9,531381461 | PCP023247 | XM_009348303 |
| PCP023254 | 12,0023474  | 12,26766454 | 12,22951883 | 12,28905923 |           |              |
| PCP023262 | 9,269898093 | 9,237616296 | 9,29156212  | 9,628755372 |           |              |
| PCP023263 | 9,167418146 | 9,170751309 | 9,275356315 | 9,839203788 | PCP023263 | XM_009363892 |
| PCP023277 | 9,136991112 | 9,41715631  | 9,411510988 | 9,867788381 | PCP023277 | XM_009357275 |
| PCP023282 | 10,12799432 | 10,24397129 | 10,65403627 | 11,30187911 | PCP023282 | XM_009357346 |
| PCP023284 | 9,247927513 | 9,685326985 | 9,222384371 | 9,488502959 | PCP023284 | XM_009357360 |
| PCP023291 | 8,875503635 | 9,019590728 | 9,099794885 | 9,321184013 |           |              |
| PCP023296 | 11,31797782 | 11,19332206 | 11,45755018 | 11,08414401 | PCP023296 | XM_009349800 |
| PCP023322 | 10,05979059 | 9,691167722 | 9,940063949 | 9,818582177 |           |              |
| PCP023324 | 8,922822231 | 8,79983204  | 8,861086906 | 8,854868383 |           |              |
| PCP023331 | 9,388727692 | 9,488502959 | 9,551381432 | 10,12498719 | PCP023331 | XM_009342697 |
| PCP023333 | 9,807886174 | 9,683573652 | 9,785730354 | 9,769292392 | PCP023333 | XM_018642666 |
| PCP023352 | 10,39695792 | 10,31364267 | 10,25581936 | 10,13656824 | PCP023352 | XM_009364388 |
| PCP023411 | 8,790087794 | 8,713111526 | 8,742578916 | 9,178241565 |           |              |
| PCP023415 | 8,885696373 | 9,236803511 | 9,203763987 | 9,67124029  | PCP023415 | XM_008341749 |
| PCP023429 | 9,659995892 | 9,609788199 | 9,802516365 | 10,28540222 |           |              |
| PCP023450 | 9,19640541  | 9,25502857  | 9,406566431 | 9,8159116   | PCP023450 | XM_008341631 |
| PCP023460 | 9,182394353 | 9,235224441 | 9,240791332 | 9,20537785  | PCP023460 | XM_018645204 |

|           |             |             |             |             |           |              |
|-----------|-------------|-------------|-------------|-------------|-----------|--------------|
| PCP023464 | 13,00457162 | 12,83880999 | 12,94416299 | 12,86611979 | PCP023464 | XM_009356400 |
| PCP023476 | 9,293080746 | 9,18157469  | 9,369226538 | 9,850186838 |           |              |
| PCP023482 | 10,35901375 | 10,31174832 | 10,20252792 | 9,930249459 | PCP023482 | XM_009366393 |
| PCP023483 | 8,730198386 | 9,189009107 | 9,133578937 | 9,621447519 | PCP023483 | XR_530846    |
| PCP023503 | 9,124974266 | 8,826548487 | 9,123267853 | 8,932716728 |           |              |
| PCP023523 | 8,951284715 | 8,998110862 | 8,90288758  | 8,87036472  | PCP023523 | XM_009348741 |
| PCP023541 | 9,687673116 | 9,184875343 | 9,424166289 | 9,330177419 |           |              |
| PCP023542 | 9,6171552   | 9,473035989 | 9,636026394 | 9,927777962 | PCP023542 | XM_017323651 |
| PCP023545 | 10,90111579 | 10,86984828 | 10,97704375 | 11,45618498 | PCP023545 | XM_009359793 |
| PCP023553 | 11,2772874  | 10,98108916 | 11,47150757 | 11,84261356 | PCP023553 | XM_008362483 |
| PCP023574 | 9,193106413 | 9,151447887 | 9,344295908 | 9,565425815 |           |              |
| PCP023598 | 9,563520437 | 9,766528909 | 9,744833837 | 10,12885787 | PCP023598 | XM_009362017 |
| PCP023599 | 11,30587365 | 11,36303963 | 11,241584   | 11,53996816 | PCP023599 | XM_009362018 |
| PCP023623 | 10,64175373 | 10,80600982 | 10,98322878 | 11,08126372 |           |              |
| PCP023658 | 9,398743692 | 9,433940073 | 9,447083226 | 9,070577167 |           |              |
| PCP023679 | 8,63542792  | 8,710806434 | 8,74708524  | 9,324180547 | PCP023679 | XM_009348364 |
| PCP023700 | 8,493174961 | 8,968666793 | 8,204571144 | 10,29385095 | PCP023700 | XM_009362009 |
| PCP023728 | 8,971543554 | 9,194756854 | 9,21916852  | 9,07325791  | PCP023728 | XM_009338475 |
| PCP023744 | 10,62143836 | 10,49785184 | 10,59681404 | 11,02882466 |           |              |
| PCP023746 | 8,761551232 | 8,657032562 | 8,821231873 | 9,167418146 |           |              |
| PCP023755 | 8,95419631  | 9,048023611 | 9,142107057 | 9,47100451  | PCP023755 | XM_017333788 |
| PCP023763 | 8,641437649 | 8,804131021 | 8,903881846 | 9,223205318 |           |              |
| PCP023794 | 9,751544059 | 9,813252106 | 9,33315535  | 9,762664404 | PCP023794 | XM_009360626 |
| PCP023797 | 9,221587121 | 9,468970167 | 9,419960178 | 9,720534991 | PCP023797 | XM_009374049 |
| PCP023823 | 11,19434442 | 11,14656868 | 11,10481495 | 11,13249973 |           |              |
| PCP023824 | 9,214319121 | 9,105908509 | 9,130132926 | 9,050746552 |           |              |
| PCP023837 | 9,118084543 | 9,251884747 | 9,279215904 | 9,593708574 |           |              |
| PCP023975 | 10,41574177 | 10,41996018 | 10,16908569 | 10,28733146 |           |              |
| PCP024032 | 8,692336525 | 8,994353437 | 8,880593701 | 8,917879246 | PCP024032 | XM_009342359 |
| PCP024069 | 11,42818742 | 11,85096815 | 11,76210377 | 12,00351791 | PCP024069 | XM_018645319 |
| PCP024094 | 11,91239164 | 11,22761594 | 11,53494966 | 11,59277002 |           |              |
| PCP024119 | 9,296916207 | 9,303027245 | 9,381542951 | 9,215945486 | PCP024119 | XM_009368529 |
| PCP024123 | 9,537218401 | 9,68707819  | 9,818582177 | 10,14551188 |           |              |
| PCP024140 | 10,37431138 | 10,82839834 | 11,31628153 | 11,53138146 | PCP024140 | XM_018649777 |
| PCP024187 | 11,55347091 | 11,65672428 | 11,77643303 | 12,07012094 | PCP024187 | XM_008344561 |
| PCP024215 | 8,437419184 | 8,602401945 | 9,033423002 | 9,828136484 | PCP024215 | XR_528432    |
| PCP024216 | 10,22641219 | 10,2487222  | 10,15186643 | 10,11286951 | PCP024216 | XM_008391541 |
| PCP024220 | 9,278449458 | 9,381542951 | 9,393755108 | 9,396604781 | PCP024220 | XM_017337009 |
| PCP024221 | 9,055282436 | 9,038013592 | 9,206208529 | 9,10938668  |           |              |
| PCP024222 | 10,08878824 | 10,4415644  | 10,64716158 | 10,78408678 |           |              |
| PCP024237 | 9,428360173 | 8,963849777 | 9,051671182 | 8,689997971 | PCP024237 | XM_008391513 |
| PCP024241 | 9,095397023 | 9,276124405 | 8,911901261 | 8,694636474 | PCP024241 | XM_008391510 |
| PCP024243 | 9,14381685  | 9,214319121 | 9,299208018 | 9,901364723 | PCP024243 | XM_008391508 |
| PCP024247 | 12,2125967  | 12,19249934 | 12,09781158 | 11,87945689 | PCP024247 | XM_008391501 |
| PCP024256 | 9,86004717  | 9,787902559 | 9,884170519 | 10,31778568 |           |              |
| PCP024265 | 9,552669098 | 9,342808055 | 9,449148645 | 9,481799432 | PCP024265 | XM_008388394 |

|           |             |             |             |             |           |              |
|-----------|-------------|-------------|-------------|-------------|-----------|--------------|
| PCP024284 | 8,696967526 | 8,828676005 | 8,95805965  | 9,462849868 | PCP024284 | XM_017335976 |
| PCP024306 | 10,68533575 | 8,73470962  | 10,09275714 | 11,18900293 | PCP024306 | NM_001302313 |
| PCP024307 | 11,22961796 | 10,74174505 | 11,42713996 | 11,5926112  | PCP024307 | XM_009378121 |
| PCP024326 | 8,95419631  | 9,018673116 | 9,216745858 | 9,102421932 | PCP024326 | XM_008390091 |
| PCP024333 | 10,65284497 | 10,66681871 | 10,74118887 | 11,16427844 | PCP024333 | XM_009362605 |
| PCP024335 | 8,951284715 | 8,908902953 | 9,047123912 | 9,479780264 |           |              |
| PCP024373 | 10,46318716 | 10,69551541 | 10,66533592 | 10,56921954 | PCP024373 | XM_009358772 |
| PCP024382 | 14,58453214 | 14,5773108  | 14,65964309 | 14,52454172 | PCP024382 | XM_009358786 |
| PCP024388 | 9,19640541  | 9,58370335  | 9,379378367 | 9,724513853 | PCP024388 | XM_008349892 |
| PCP024405 | 9,026053072 | 8,873444113 | 9,028817757 | 9,471675214 |           |              |
| PCP024406 | 10,82469626 | 10,45293102 | 10,78490471 | 10,16783208 | PCP024406 | XM_009343749 |
| PCP024418 | 10,84051831 | 10,82151093 | 10,85096815 | 10,80224977 |           |              |
| PCP024425 | 10,52029455 | 10,18611424 | 10,2644426  | 10,49418557 |           |              |
| PCP024429 | 10,80950287 | 11,04848687 | 11,31571566 | 11,77533455 | PCP024429 | NM_001294022 |
| PCP024435 | 9,223205318 | 9,199672345 | 9,199672345 | 9,537859025 | PCP024435 | XM_008372461 |
| PCP024455 | 12,00714293 | 11,97894994 | 12,10558118 | 11,87305955 | PCP024455 | XM_018651591 |
| PCP024497 | 8,779161208 | 8,703903573 | 9,053464362 | 8,985841937 |           |              |
| PCP024515 | 8,687655621 | 8,963849777 | 9,159871337 | 9,488502959 |           |              |
| PCP024517 | 9,652844973 | 9,288473922 | 9,493855449 | 9,42485912  | PCP024517 | XM_008379173 |
| PCP024522 | 9,645063941 | 9,451891079 | 9,879077758 | 10,25423735 | PCP024522 | XM_009367304 |
| PCP024573 | 10,35461304 | 9,97441459  | 10,28771238 | 10,31967212 |           |              |
| PCP024574 | 9,678899386 | 9,682415283 | 9,63964821  | 9,979182225 | PCP024574 | XM_009337545 |
| PCP024596 | 8,41502341  | 8,566054038 | 8,884689491 | 9,682415283 | PCP024596 | XM_009335370 |
| PCP024610 | 9,602383386 | 9,685326985 | 9,941047606 | 10,41433641 | PCP024610 | XM_018646363 |
| PCP024613 | 10,94251451 | 10,99293834 | 10,97010589 | 11,28674834 | PCP024613 | XM_009367819 |
| PCP024630 | 10,35828856 | 10,6329952  | 10,68999797 | 10,93492188 | PCP024630 | XM_009341660 |
| PCP024647 | 9,148044344 | 9,008428622 | 9,045295522 | 8,886702554 | PCP024647 | XM_009369455 |
| PCP024655 | 9,248710343 | 9,047123912 | 9,048949988 | 9,222384371 | PCP024655 | XM_009369469 |
| PCP024656 | 8,940548521 | 9,118084543 | 9,329415156 | 9,829722735 | PCP024656 | XM_009369470 |
| PCP024663 | 8,932716728 | 8,680640826 | 8,85277917  | 9,251884747 |           |              |
| PCP024664 | 10,76597392 | 10,70534728 | 10,80251637 | 10,62235387 |           |              |
| PCP024687 | 7,872397856 | 9,390878304 | 10,19352536 | 12,38927371 | PCP024687 | XM_018649522 |
| PCP024698 | 8,971543554 | 9,033423002 | 9,113742166 | 8,998110862 | PCP024698 | XM_009365641 |
| PCP024706 | 8,97441459  | 8,797661526 | 9,211888295 | 9,019590728 | PCP024706 | XM_009365657 |
| PCP024728 | 10,63390341 | 10,6399466  | 10,74679141 | 11,25049384 |           |              |
| PCP024753 | 11,65060302 | 11,48011867 | 11,49419057 | 11,62738341 | PCP024753 | XM_009375416 |
| PCP024755 | 11,73216743 | 11,76639225 | 11,69101501 | 11,80264964 |           |              |
| PCP024756 | 9,338357556 | 9,760437201 | 9,415044544 | 9,826548487 | PCP024756 | XM_009352080 |
| PCP024758 | 10,12153352 | 10,05483491 | 10,0370939  | 10,07236042 | PCP024758 | XM_009352079 |
| PCP024777 | 9,841831634 | 10,00235092 | 10,04712391 | 10,2467406  | PCP024777 | XM_009369813 |
| PCP024786 | 9,984888362 | 9,77148947  | 9,987732989 | 9,952260754 | PCP024786 | XM_009341572 |
| PCP024791 | 10,37685252 | 10,57774037 | 10,74707685 | 10,23242093 |           |              |
| PCP024809 | 8,517000043 | 8,857980995 | 8,948367232 | 9,743706817 |           |              |
| PCP024827 | 9,476401941 | 9,471675214 | 9,185693134 | 8,511752654 |           |              |
| PCP024828 | 8,937609223 | 9,038918989 | 9,206208529 | 9,405141463 | PCP024828 | XM_009356802 |
| PCP024835 | 9,232828614 | 9,023283079 | 8,908902953 | 8,95419631  |           |              |

|           |             |             |             |             |           |              |
|-----------|-------------|-------------|-------------|-------------|-----------|--------------|
| PCP024857 | 8,904875427 | 9,027905997 | 8,960001932 | 8,810571635 | PCP024857 | XM_009361256 |
| PCP024865 | 9,837107523 | 9,463524373 | 9,537218401 | 9,407267764 | PCP024865 | XM_008395297 |
| PCP024889 | 9,247144259 | 8,804131021 | 8,779161208 | 8,631795481 | PCP024889 | XM_008352647 |
| PCP024900 | 9,006550496 | 9,035266491 | 9,254249162 | 9,094526396 | PCP024900 | XM_009374845 |
| PCP024911 | 9,174925683 | 9,142949447 | 9,262094845 | 9,5980525   | PCP024911 | XM_009349769 |
| PCP024918 | 10,83973131 | 10,81831854 | 10,92703717 | 11,39499851 | PCP024918 | XM_009374705 |
| PCP024933 | 10,88899433 | 10,7153872  | 10,73358313 | 10,85642553 | PCP024933 | XM_009371692 |
| PCP024936 | 8,714245518 | 9,284639053 | 9,059804103 | 9,128432607 | PCP024936 | XM_009349492 |
| PCP024958 | 12,25748508 | 11,79007557 | 11,73033002 | 12,36768776 |           |              |
| PCP024959 | 9,63481105  | 9,004698008 | 9,153121312 | 9,034331283 | PCP024959 | XM_009365919 |
| PCP024971 | 10,47606772 | 10,42661071 | 10,24911345 | 10,33650656 |           |              |
| PCP024976 | 9,648051932 | 9,589969422 | 9,396604781 | 9,317412614 | PCP024976 | XM_009367332 |
| PCP024981 | 9,188168462 | 9,123267853 | 9,406566431 | 9,562872035 | PCP024981 | XM_009353893 |
| PCP024995 | 9,105908509 | 9,105908509 | 9,14381685  | 9,101529272 | PCP024995 | XM_009381171 |
| PCP025001 | 9,557789157 | 9,350939182 | 9,387306529 | 9,06250492  | PCP025001 | XM_009381157 |
| PCP025002 | 10,40974096 | 10,75014588 | 10,53850906 | 10,23041679 | PCP025002 | XM_018652474 |
| PCP025016 | 9,146365017 | 9,08127038  | 9,06520069  | 8,872428639 | PCP025016 | XM_009370504 |
| PCP025039 | 11,77300317 | 11,57884439 | 11,86057101 | 12,40771123 | PCP025039 | XM_009358308 |
| PCP025043 | 9,150585062 | 9,130132926 | 8,89684702  | 8,757123282 | PCP025043 | XM_009358294 |
| PCP025050 | 11,30701292 | 11,30168481 | 11,30624971 | 11,30168481 |           |              |
| PCP025057 | 9,448467384 | 9,82336724  | 10,14678503 | 10,57617253 | PCP025057 | XM_009346318 |
| PCP025073 | 9,454648871 | 9,364134655 | 9,615942233 | 9,944463173 | PCP025073 | XM_009363420 |
| PCP025079 | 11,03181835 | 10,94397991 | 10,88289519 | 11,41943355 | PCP025079 | XM_009347225 |
| PCP025100 | 9,875488276 | 9,790071499 | 10,07190476 | 10,41468524 | PCP025100 | XM_009377195 |
| PCP025113 | 8,788979283 | 9,160703421 | 9,536577492 | 10,13869418 | PCP025113 | XM_009361765 |
| PCP025125 | 9,892800824 | 9,54689446  | 9,336127147 | 9,22881869  | PCP025125 | XM_009362546 |
| PCP025144 | 9,557789157 | 9,426956579 | 9,525520809 | 9,537859025 |           |              |
| PCP025169 | 10,95274125 | 11,15924065 | 11,05166439 | 11,4446681  | PCP025169 | XM_008345047 |
| PCP025186 | 9,01402047  | 9,300741498 | 9,652844973 | 9,701011827 |           |              |
| PCP025189 | 9,956129273 | 10,56700537 | 10,14551188 | 10,37503943 | PCP025189 | XM_009354534 |
| PCP025205 | 11,64054773 | 11,73442596 | 11,67830523 | 11,72593283 | PCP025205 | XM_008371467 |
| PCP025210 | 10,11113567 | 10,18652284 | 10,01726776 | 9,936637939 | PCP025210 | XM_009365746 |
| PCP025225 | 14,10800737 | 13,76248586 | 13,87331626 | 14,15426434 |           |              |
| PCP025260 | 9,603014275 | 9,513727596 | 9,612260337 | 9,552035018 | PCP025260 | XM_009339807 |
| PCP025272 | 9,971543554 | 10,0274499  | 10,02928723 | 9,990103964 | PCP025272 | XM_018646246 |
| PCP025321 | 8,790087794 | 8,891783703 | 8,999069838 | 8,849655303 | PCP025321 | XM_008231497 |
| PCP025338 | 10,64565843 | 10,56541629 | 10,61777048 | 10,91936243 |           |              |
| PCP025357 | 9,016808288 | 9,048023611 | 9,06520069  | 9,017727086 | PCP025357 | XM_008374939 |
| PCP025373 | 9,705632387 | 9,914878405 | 9,803049401 | 9,917864332 | PCP025373 | XM_018648248 |
| PCP025380 | 9,82124782  | 9,88519302  | 9,872413248 | 9,910387894 | PCP025380 | XM_008361033 |
| PCP025387 | 10,43740878 | 10,47573343 | 10,53786873 | 10,4307975  | PCP025387 | XM_018645899 |
| PCP025403 | 10,17700835 | 9,82707272  | 10,05934446 | 9,742023058 | PCP025403 | XM_008377802 |
| PCP025440 | 10,34429591 | 10,3586512  | 10,47539906 | 10,40479032 |           |              |
| PCP025461 | 10,01029032 | 9,927289081 | 10,1275688  | 9,99859043  | PCP025461 | XM_009344095 |
| PCP025462 | 9,872936465 | 9,68474862  | 9,69406183  | 10,603005   | PCP025462 | XR_002271563 |
| PCP025476 | 8,406545173 | 8,735826768 | 9,372146798 | 9,272233193 |           |              |

|           |             |             |             |             |           |              |
|-----------|-------------|-------------|-------------|-------------|-----------|--------------|
| PCP025495 | 10,45635442 | 10,47032332 | 10,42451275 | 10,78299821 | PCP025495 | XM_008370786 |
| PCP025508 | 9,14381685  | 10,26405548 | 10,81644771 | 14,02502447 | PCP025508 | XR_668418    |
| PCP025509 | 8,856954575 | 8,901862467 | 8,943481842 | 9,380828997 | PCP025509 | XM_009369638 |
| PCP025674 | 9,913891691 | 10,28578365 | 9,553955615 | 10,05619061 | PCP025674 | XM_009367378 |
| PCP025752 | 13,5419835  | 13,60002903 | 13,71978132 | 13,91210997 | PCP025752 | XM_009336070 |
| PCP025757 | 10,215533   | 10,16028744 | 10,33687472 | 10,59089576 |           |              |
| PCP025764 | 10,41750445 | 10,00468396 | 9,914878405 | 10,12240095 | PCP025764 | XM_009336190 |
| PCP025773 | 11,29920802 | 10,86134285 | 11,26795708 | 11,15334302 | PCP025773 | XM_009336400 |
| PCP025774 | 9,811647632 | 9,770944642 | 9,803598384 | 10,14551188 |           |              |
| PCP025794 | 10,033423   | 9,725076497 | 9,713678633 | 9,654636029 | PCP025794 | XM_009336604 |
| PCP025799 | 10,66059318 | 10,85564717 | 10,84836473 | 10,92654062 | PCP025799 | XM_009336652 |
| PCP025803 | 9,009352771 | 9,301496195 | 9,343563277 | 9,203763987 | PCP025803 | XM_008368526 |
| PCP025816 | 8,875503635 | 8,75598914  | 8,917879246 | 9,200481794 | PCP025816 | XM_009336928 |
| PCP025826 | 11,21208899 | 11,58527712 | 11,37666806 | 11,18920683 | PCP025826 | XM_009359025 |
| PCP025832 | 9,100662339 | 9,215945486 | 9,579938142 | 9,600526229 | PCP025832 | XM_009380502 |
| PCP025843 | 13,05081286 | 13,11645281 | 13,27491244 | 13,77591887 | PCP025843 | XM_008372488 |
| PCP025849 | 8,632995197 | 8,775873612 | 8,715378619 | 9,297672907 | PCP025849 | XM_009339333 |
| PCP025857 | 9,916372141 | 10,24990749 | 10,2495046  | 10,31023786 |           |              |
| PCP025858 | 9,618991087 | 9,334653186 | 9,574271841 | 9,552669098 |           |              |
| PCP025874 | 9,690574236 | 9,895832748 | 10,12627857 | 10,35681507 |           |              |
| PCP025898 | 10,34872815 | 10,69841818 | 10,65702363 | 10,86521517 |           |              |
| PCP025900 | 11,46743743 | 11,53948357 | 11,34374092 | 11,25384748 |           |              |
| PCP025902 | 10,31665489 | 10,17533747 | 10,39660478 | 10,57522723 |           |              |
| PCP025908 | 10,22641219 | 9,983948403 | 10,19311874 | 10,14847658 | PCP025908 | XM_017336066 |
| PCP025910 | 9,925302224 | 9,894317583 | 10,033423   | 10,42381975 | PCP025910 | XM_017331992 |
| PCP025915 | 8,426264755 | 8,541754876 | 8,890781061 | 10,65850606 | PCP025915 | XM_017336537 |
| PCP025923 | 10,11504365 | 10,45704223 | 9,845490051 | 10,58683979 |           |              |
| PCP025924 | 9,991521846 | 10,05437369 | 10,13528603 | 10,51175265 |           |              |
| PCP025934 | 10,12240095 | 10,05256805 | 10,20661148 | 10,63511045 | PCP025934 | XM_009364752 |
| PCP025935 | 10,436368   | 10,50647619 | 10,79658315 | 11,20660538 | PCP025935 | XM_009364748 |
| PCP025941 | 10,64565843 | 10,57931594 | 10,66917739 | 10,52323849 | PCP025941 | XM_009364740 |
| PCP025942 | 11,15629169 | 10,99529371 | 11,18218948 | 11,6414512  | PCP025942 | XM_009364741 |
| PCP025974 | 9,324923085 | 9,426956579 | 9,290018847 | 9,188168462 | PCP025974 | XM_009358144 |
| PCP025990 | 10,7808104  | 10,79901443 | 10,67624801 | 10,84392105 | PCP025990 | XM_009358102 |
| PCP026006 | 9,604868234 | 9,582461918 | 9,644451179 | 10,10109587 | PCP026006 | XM_009361114 |
| PCP026051 | 9,276892087 | 9,276892087 | 9,238404739 | 9,261319247 | PCP026051 | XM_009354731 |
| PCP026056 | 11,53786388 | 11,54673533 | 11,66666784 | 11,98903964 |           |              |
| PCP026064 | 10,4307975  | 10,3818998  | 10,33128647 | 10,2632692  | PCP026064 | XM_009354757 |
| PCP026096 | 9,861598739 | 9,814854798 | 9,93516505  | 10,32268306 | PCP026096 | XM_009340008 |
| PCP026115 | 8,945443836 | 8,80841723  | 8,949330653 | 9,405843489 | PCP026115 | XM_009348161 |
| PCP026148 | 9,864186145 | 10,06743436 | 10,3894485  | 11,13506795 | PCP026148 | XM_008341716 |
| PCP026149 | 10,87779792 | 10,91413843 | 10,90086681 | 10,93171999 | PCP026149 | XM_017323701 |
| PCP026150 | 9,322671793 | 9,346513733 | 9,47370575  | 9,928770029 | PCP026150 | XM_008391303 |
| PCP026151 | 10,14678503 | 10,38478375 | 10,58934217 | 10,8191173  | PCP026151 | XM_008341712 |
| PCP026158 | 9,383704292 | 9,18157469  | 9,412209922 | 9,692911856 | PCP026158 | XM_008391291 |
| PCP026160 | 8,818038868 | 8,938609256 | 8,869347076 | 8,809510912 | PCP026160 | XM_018648320 |

|           |             |             |             |             |           |              |
|-----------|-------------|-------------|-------------|-------------|-----------|--------------|
| PCP026164 | 9,398743692 | 9,19640541  | 8,659389441 | 8,620842965 |           |              |
| PCP026171 | 8,805195705 | 8,501160452 | 9,117201525 | 9,208648936 | PCP026171 | XM_009354446 |
| PCP026175 | 8,95805965  | 8,708497652 | 9,19640541  | 9,626311362 | PCP026175 | XM_018646694 |
| PCP026198 | 10,12066557 | 9,984888362 | 10,42066556 | 10,43809528 | PCP026198 | XM_009367479 |
| PCP026202 | 9,257387843 | 9,061587209 | 9,276892087 | 9,203763987 | PCP026202 | XM_009367483 |
| PCP026205 | 10,07592031 | 9,626311362 | 9,749869427 | 9,693486957 |           |              |
| PCP026223 | 9,158180476 | 9,05709822  | 9,058884672 | 9,136145235 | PCP026223 | XM_009347791 |
| PCP026241 | 10,59276535 | 10,49818105 | 10,56288157 | 10,89835197 | PCP026241 | XM_009345655 |
| PCP026250 | 9,367786025 | 9,18157469  | 9,176597042 | 9,269126679 | PCP026250 | XM_009363253 |
| PCP026292 | 9,931727372 | 9,628755372 | 9,726780139 | 9,626311362 | PCP026292 | XM_009360277 |
| PCP026297 | 9,606719814 | 9,601157931 | 9,561612539 | 9,589332801 | PCP026297 | XM_009360283 |
| PCP026299 | 9,226412193 | 9,362667132 | 9,517019734 | 9,705062108 | PCP026299 | XM_009342378 |
| PCP026304 | 9,104153166 | 9,238404739 | 8,979196518 | 9,235224441 | PCP026304 | XM_009342388 |
| PCP026305 | 12,69385063 | 12,88054013 | 12,78742716 | 12,63496302 | PCP026305 | XM_008338767 |
| PCP026318 | 8,87857209  | 8,827596761 | 8,743723645 | 9,160703421 | PCP026318 | XM_018644518 |
| PCP026321 | 9,45532722  | 9,553302899 | 9,55522181  | 9,451891079 | PCP026321 | XM_009345287 |
| PCP026335 | 10,82681063 | 10,84496463 | 11,00702727 | 10,84182377 | PCP026335 | XM_008375547 |
| PCP026345 | 8,880593701 | 8,803065551 | 8,847589839 | 9,234410306 | PCP026345 | XM_008364713 |
| PCP026348 | 9,426264755 | 9,567956075 | 9,598666678 | 9,574271841 | PCP026348 | XM_009338597 |
| PCP026355 | 9,664145025 | 9,73357466  | 9,872936465 | 10,20089861 |           |              |
| PCP026385 | 9,468277836 | 9,535275377 | 9,695802471 | 9,890264277 |           |              |
| PCP026388 | 9,206208529 | 8,901862467 | 9,293080746 | 9,042562264 | PCP026388 | XM_009362759 |
| PCP026399 | 10,16490693 | 10,18446627 | 10,17158965 | 9,97632067  | PCP026399 | XM_009362780 |
| PCP026409 | 9,428360173 | 9,342074668 | 9,21916852  | 9,802516365 |           |              |
| PCP026432 | 10,64955259 | 10,8273427  | 11,02721489 | 11,06877828 |           |              |
| PCP026452 | 8,999069838 | 9,087462841 | 9,255807556 | 9,478425839 |           |              |
| PCP026455 | 9,394462695 | 9,37286506  | 9,589969422 | 9,871397049 | PCP026455 | XM_009348953 |
| PCP026460 | 14,54323305 | 14,13059711 | 14,40786522 | 14,68697482 | PCP026460 | XM_009348866 |
| PCP026472 | 9,592457037 | 9,614102459 | 9,631777296 | 9,29156212  | PCP026472 | XM_009374430 |
| PCP026473 | 9,247144259 | 9,159871337 | 9,413627929 | 9,630576566 |           |              |
| PCP026501 | 11,90275194 | 12,13153547 | 12,20314303 | 12,85940472 | PCP026501 | XM_009343151 |
| PCP026527 | 9,370687407 | 9,510427928 | 9,422064766 | 9,525520809 | PCP026527 | XM_009359897 |
| PCP026533 | 10,00235092 | 10,00562455 | 9,960001932 | 9,887723262 | PCP026533 | XM_009359909 |
| PCP026534 | 9,787363896 | 9,6171552   | 9,862637358 | 10,03983752 |           |              |
| PCP026564 | 8,964831792 | 9,290779173 | 9,339850003 | 9,458057945 | PCP026564 | XM_009367687 |
| PCP026580 | 11,62753388 | 11,58057421 | 11,46539805 | 11,42486437 |           |              |
| PCP026611 | 10,34318572 | 10,480457   | 10,56319627 | 10,94128975 | PCP026611 | XM_009362263 |
| PCP026612 | 8,918863237 | 9,024225474 | 9,09011242  | 9,693486957 |           |              |
| PCP026623 | 9,266013461 | 9,88519302  | 9,940563202 | 9,865733271 | PCP026623 | XM_009362281 |
| PCP026629 | 9,066977144 | 9,055282436 | 9,067891433 | 8,864186145 | PCP026629 | XM_008381164 |
| PCP026644 | 9,448467384 | 9,387306529 | 9,439477697 | 9,916879659 | PCP026644 | XM_008391621 |
| PCP026654 | 9,70333261  | 9,72395099  | 9,916879659 | 9,803598384 |           |              |
| PCP026671 | 10,83051521 | 10,64385619 | 10,77478706 | 10,86238165 | PCP026671 | XM_008350181 |
| PCP026677 | 9,367043381 | 9,472345607 | 9,611633479 | 9,845490051 |           |              |
| PCP026697 | 9,807886174 | 9,63540978  | 9,752664976 | 10,09407769 |           |              |
| PCP026702 | 9,261319247 | 9,356826076 | 9,929746623 | 10,20741705 |           |              |

|           |             |             |             |             |           |              |
|-----------|-------------|-------------|-------------|-------------|-----------|--------------|
| PCP026713 | 9,315149562 | 9,476401941 | 9,689997971 | 9,603626345 | PCP026713 | XM_009362344 |
| PCP026792 | 9,390878304 | 9,111996335 | 9,782457711 | 9,743151394 | PCP026792 | XM_009370473 |
| PCP026837 | 8,581200582 | 8,86727874  | 9,201315296 | 10,01634867 | PCP026837 | XM_009361776 |
| PCP026865 | 10,97704375 | 10,95951661 | 11,14720492 | 11,46437727 | PCP026865 | XM_008379799 |
| PCP026881 | 9,286164981 | 9,286164981 | 9,536577492 | 9,305309377 | PCP026881 | XM_009345707 |
| PCP026895 | 10,98394128 | 11,12045174 | 11,31420369 | 11,57884439 | PCP026895 | XM_008356623 |
| PCP026905 | 10,66651695 | 10,5143886  | 10,54464573 | 10,88213099 |           |              |
| PCP026917 | 9,010304306 | 9,01402047  | 9,410811715 | 9,670656249 | PCP026917 | XM_016792767 |
| PCP026922 | 9,930249459 | 9,735268302 | 9,866243459 | 9,662365743 | PCP026922 | XM_009359000 |
| PCP026929 | 10,29039906 | 10,47742436 | 10,32605865 | 10,5635109  | PCP026929 | XM_009351410 |
| PCP026932 | 10,38081818 | 10,49785184 | 10,480457   | 11,01262454 | PCP026932 | XM_009351431 |
| PCP026935 | 11,39088368 | 11,32605303 | 11,27029533 | 11,38550114 | PCP026935 | XM_009367063 |
| PCP026939 | 9,671841781 | 9,751544059 | 9,916372141 | 10,13271821 | PCP026939 | XM_018643434 |
| PCP026958 | 9,402308618 | 9,445697739 | 9,764871591 | 10,017741   | PCP026958 | XM_008357142 |
| PCP026960 | 11,60994976 | 11,82283768 | 11,59011917 | 11,30453956 |           |              |
| PCP026966 | 12,25571611 | 12,40221267 | 12,37259303 | 12,37883671 | PCP026966 | XM_008365956 |
| PCP026970 | 10,17783061 | 10,2765083  | 10,32755264 | 11,03043954 |           |              |
| PCP026972 | 9,540457428 | 9,581821975 | 9,633594681 | 10,01402047 |           |              |
| PCP027002 | 9,575539247 | 9,383704292 | 9,243959396 | 8,912889336 | PCP027002 | XM_008366547 |
| PCP027021 | 15,10612655 | 15,16477615 | 15,2306836  | 15,81264537 |           |              |
| PCP027103 | 11,72948055 | 11,5436747  | 11,58402294 | 11,88671398 | PCP027103 | XM_009374437 |
| PCP027125 | 9,910387894 | 9,946906274 | 9,999534994 | 10,61654884 |           |              |
| PCP027137 | 8,891783703 | 9,213517401 | 9,269898093 | 9,239192751 |           |              |
| PCP027329 | 9,079484784 | 9,075933681 | 9,341340908 | 9,72905987  | PCP027329 | XM_009346823 |
| PCP027338 | 9,495855027 | 9,48984796  | 9,675374899 | 9,931727372 |           |              |
| PCP027356 | 9,697541014 | 9,281535984 | 9,662970945 | 9,990572019 | PCP027356 | XM_009339370 |
| PCP027365 | 12,94933977 | 12,73174329 | 12,75217155 | 13,12751076 | PCP027365 | XR_664702    |
| PCP027366 | 11,28636716 | 11,47201553 | 11,43427898 | 11,71881967 |           |              |
| PCP027373 | 9,319672121 | 9,297672907 | 9,462154593 | 9,704474311 |           |              |
| PCP027377 | 9,565425815 | 9,383704292 | 9,223205318 | 9,677719642 | PCP027377 | XR_001951673 |
| PCP027387 | 10,21391832 | 9,905883363 | 10,05347794 | 10,09671515 |           |              |
| PCP027402 | 10,24397129 | 10,08258817 | 10,15650027 | 10,23161721 |           |              |
| PCP027407 | 8,978224236 | 9,238404739 | 9,283088353 | 9,450530824 | PCP027407 | XM_009378349 |
| PCP027435 | 9,499845887 | 9,512404684 | 9,62388149  | 9,932701967 | PCP027435 | XM_018650116 |
| PCP027439 | 11,05979734 | 10,86856794 | 10,90212635 | 11,03937833 |           |              |
| PCP027480 | 9,925806611 | 9,982523054 | 9,938594555 | 9,688827272 | PCP027480 | XM_009370389 |
| PCP027494 | 8,810571635 | 8,918863237 | 8,807354922 | 8,84862294  | PCP027494 | XM_018643807 |
| PCP027504 | 8,640244936 | 8,659389441 | 8,937609223 | 9,208648936 | PCP027504 | XM_017326947 |
| PCP027512 | 10,19229281 | 10,23281662 | 10,31590808 | 10,64385619 | PCP027512 | XM_018645926 |
| PCP027519 | 9,010304306 | 8,87036472  | 9,18157469  | 9,312882955 | PCP027519 | XR_665912    |
| PCP027526 | 8,807354922 | 8,87857209  | 9,053464362 | 9,251884747 | PCP027526 | XM_009345390 |
| PCP027533 | 12,22761594 | 12,11656165 | 12,3133564  | 12,73795077 | PCP027533 | XM_009345415 |
| PCP027537 | 11,18900293 | 11,27980208 | 11,404785   | 11,60933113 |           |              |
| PCP027577 | 12,73336917 | 12,58480517 | 13,07347215 | 13,69877736 | PCP027577 | XM_009342337 |
| PCP027628 | 8,949330653 | 8,824417827 | 8,895817605 | 8,805195705 | PCP027628 | XM_009356066 |
| PCP027636 | 9,691167722 | 9,688250309 | 9,334653186 | 9,067891433 | PCP027636 | XM_009340670 |



|           |             |             |             |             |           |              |
|-----------|-------------|-------------|-------------|-------------|-----------|--------------|
| PCP027647 | 9,240004193 | 9,267559206 | 9,623277955 | 9,688250309 | PCP027647 | XM_009340640 |
| PCP027680 | 9,392317423 | 9,327170869 | 9,507140523 | 9,412209922 | PCP027680 | XR_666143    |
| PCP027681 | 11,1221809  | 11,07793058 | 11,32192809 | 11,29806257 |           |              |
| PCP027682 | 11,81284714 | 11,65895674 | 11,72266667 | 11,50167301 | PCP027682 | XM_018645554 |
| PCP027685 | 9,217545787 | 9,203763987 | 9,253445696 | 9,920352855 | PCP027685 | XM_008364107 |
| PCP027692 | 9,292321633 | 9,136145235 | 9,158180476 | 8,887738491 | PCP027692 | XM_009353230 |
| PCP027694 | 9,441554026 | 9,569855608 | 9,589332801 | 9,998124969 | PCP027694 | XM_008390973 |
| PCP027697 | 10,64955259 | 10,83051521 | 11,04074863 | 11,42818742 |           |              |
| PCP027705 | 9,139551352 | 9,284639053 | 9,374322251 | 9,292321633 | PCP027705 | XM_008368764 |
| PCP027711 | 9,084808388 | 9,156512913 | 9,083027168 | 9,024225474 | PCP027711 | XM_008390953 |
| PCP027712 | 8,700439718 | 8,792237182 | 9,20537785  | 9,47100451  | PCP027712 | XM_008350521 |
| PCP027723 | 9,128432607 | 9,566054038 | 9,539158811 | 9,735843688 | PCP027723 | XM_018642907 |
| PCP027724 | 10,07992473 | 9,859534786 | 9,947388554 | 10,08170978 |           |              |
| PCP027728 | 9,132705355 | 9,25502857  | 9,362667132 | 9,204571144 | PCP027728 | XM_009336647 |
| PCP027776 | 10,18487534 | 10,27184816 | 10,27107779 | 10,25856603 |           |              |
| PCP027780 | 10,25541812 | 9,911886285 | 10,10372055 | 10,47742436 |           |              |
| PCP027789 | 9,283088353 | 9,397310972 | 9,362667132 | 9,333893285 | PCP027789 | XM_009338834 |
| PCP027800 | 9,826548487 | 9,895317771 | 10,02836195 | 10,46488265 | PCP027800 | XM_009374281 |
| PCP027845 | 9,098032083 | 9,106772296 | 9,102421932 | 9,441554026 |           |              |
| PCP027856 | 12,53503231 | 12,36714169 | 12,70080165 | 12,75968017 | PCP027856 | XM_009348395 |
| PCP027880 | 9,928770029 | 9,933690655 | 10,26130749 | 10,20661148 |           |              |
| PCP027888 | 9,159871337 | 8,913876736 | 9,016808288 | 8,983934156 |           |              |
| PCP027907 | 11,71152502 | 11,78149496 | 11,71881967 | 11,80681945 |           |              |
| PCP027909 | 10,13699111 | 10,01402047 | 10,17033821 | 10,51109044 | PCP027909 | XM_009345837 |
| PCP027924 | 9,632995197 | 9,457380879 | 9,49119171  | 9,430452552 |           |              |
| PCP027933 | 8,89684702  | 9,004698008 | 9,528121969 | 9,903881846 | PCP027933 | XM_009357721 |
| PCP027959 | 9,111996335 | 9,140395236 | 9,020507757 | 9,405141463 | PCP027959 | XM_009352614 |
| PCP027964 | 10,43948809 | 10,6060998  | 10,78381676 | 11,00445223 | PCP027964 | XM_009345916 |
| PCP027980 | 8,727920455 | 9,13442632  | 9,431142371 | 10,23082505 | PCP027980 | XM_009363009 |
| PCP027981 | 10,07190476 | 10,17492568 | 10,19269967 | 10,15902615 |           |              |
| PCP028002 | 11,47438027 | 11,35351628 | 11,46760555 | 11,27999935 | PCP028002 | XM_009356154 |
| PCP028011 | 9,651051691 | 9,37721053  | 9,295378654 | 8,918863237 | PCP028011 | XM_018645151 |
| PCP028017 | 10,89456769 | 10,86289302 | 10,92851838 | 10,9331964  |           |              |
| PCP028020 | 9,97632067  | 9,999534994 | 9,881113961 | 10,19926745 | PCP028020 | XM_008354995 |
| PCP028022 | 9,951765533 | 9,932214752 | 9,97441459  | 10,41855893 |           |              |
| PCP028025 | 9,186535222 | 9,215120395 | 9,365600686 | 10,00327897 | PCP028025 | XM_008354989 |
| PCP028028 | 8,586201784 | 8,637820329 | 8,890781061 | 9,564778269 | PCP028028 | XM_009355292 |
| PCP028048 | 9,589332801 | 9,364134655 | 9,403715086 | 9,54239349  | PCP028048 | XM_018642372 |
| PCP028053 | 10,02004932 | 10,05572982 | 10,17076382 | 10,5949497  | PCP028053 | XM_018648327 |
| PCP028058 | 9,451211112 | 9,36047402  | 9,488502959 | 9,760437201 | PCP028058 | XM_009350741 |
| PCP028097 | 11,5888692  | 11,35259523 | 11,55378766 | 11,96313812 | PCP028097 | XM_009360319 |
| PCP028114 | 9,571126898 | 9,523561956 | 9,640841416 | 10,07992473 | PCP028114 | XM_008393191 |
| PCP028135 | 9,056177063 | 8,989621566 | 9,304533858 | 9,089238597 | PCP028135 | NM_001328717 |
| PCP028143 | 13,34669794 | 13,48947169 | 13,49047486 | 13,6129065  |           |              |
| PCP028146 | 10,04803724 | 9,578693464 | 9,68707819  | 9,353146825 | PCP028146 | XM_009349821 |
| PCP028177 | 9,490509963 | 9,762664404 | 9,782998209 | 10,03296865 | PCP028177 | XM_009377065 |

|           |             |             |             |             |           |              |
|-----------|-------------|-------------|-------------|-------------|-----------|--------------|
| PCP028194 | 8,956143797 | 8,495855027 | 8,74819285  | 9,928266677 |           |              |
| PCP028203 | 9,720534991 | 9,820705514 | 10,08304047 | 10,03387721 |           |              |
| PCP028208 | 8,944477815 | 9,42485912  | 9,165736112 | 9,426264755 | PCP028208 | XM_009341772 |
| PCP028210 | 8,898843202 | 9,629957618 | 9,29156212  | 9,070577167 |           |              |
| PCP028216 | 9,925806611 | 9,993886607 | 10,00327897 | 10,52290515 | PCP028216 | XM_008394460 |
| PCP028217 | 9,872936465 | 10,18570552 | 10,18899675 | 10,43844881 |           |              |
| PCP028249 | 9,318158642 | 9,320416982 | 9,50249371  | 13,3928983  | PCP028249 | XM_009356948 |
| PCP028279 | 9,312134193 | 9,637222599 | 9,746514321 | 9,972505988 |           |              |
| PCP028283 | 9,322671793 | 9,437398376 | 9,972505988 | 9,971543554 | PCP028283 | XM_008390094 |
| PCP028284 | 9,895832748 | 9,856939018 | 10,1412514  | 9,87958325  | PCP028284 | XR_531593    |
| PCP028294 | 9,200481794 | 8,982993575 | 8,73470962  | 8,779161208 | PCP028294 | XM_009359548 |
| PCP028323 | 9,534633604 | 9,484480553 | 9,497851837 | 9,939579214 | PCP028323 | XM_009346570 |
| PCP028353 | 12,9708249  | 12,78497626 | 12,88073144 | 12,78756184 | PCP028353 | XM_009364053 |
| PCP028356 | 9,654045226 | 9,822299952 | 9,790625442 | 9,653436267 | PCP028356 | XM_008339136 |
| PCP028376 | 9,837107523 | 9,943979914 | 10,06743436 | 10,37937837 | PCP028376 | XM_008369209 |
| PCP028381 | 9,461479447 | 8,959045612 | 8,850718177 | 8,089212109 | PCP028381 | XM_009343940 |
| PCP028386 | 8,928755227 | 8,831845581 | 8,723387907 | 8,875503635 | PCP028386 | XM_009381338 |
| PCP028408 | 9,246336825 | 9,382991408 | 9,385862401 | 9,387306529 |           |              |
| PCP028409 | 11,30092449 | 11,02467567 | 11,13335417 | 11,39356743 | PCP028409 | XM_009348361 |
| PCP028416 | 10,54303182 | 10,55842071 | 11,11850638 | 10,94763694 | PCP028416 | XM_018644245 |
| PCP028428 | 9,695802471 | 10,10852446 | 9,508448461 | 9,544326957 | PCP028428 | XM_009365279 |
| PCP028442 | 8,937609223 | 8,888743249 | 8,863164132 | 8,836050355 | PCP028442 | XM_009347598 |
| PCP028473 | 8,984902599 | 8,935666001 | 9,107661718 | 8,743723645 | PCP028473 | XM_008358817 |
| PCP028477 | 10,80976813 | 10,85174904 | 10,80789422 | 11,162813   | PCP028477 | XM_009370687 |
| PCP028497 | 10,94104761 | 10,96168844 | 11,23222304 | 11,65314513 | PCP028497 | XM_009376293 |
| PCP028507 | 9,634212071 | 9,689421477 | 9,606090543 | 9,292321633 |           |              |
| PCP028515 | 11,50498281 | 11,92097432 | 11,82906069 | 12,04017668 | PCP028515 | XM_009341445 |
| PCP028519 | 10,59276535 | 10,73470962 | 10,8844224  | 11,34411279 | PCP028519 | XM_008356623 |
| PCP028540 | 10,11461429 | 10,12627857 | 10,033423   | 10,1382718  |           |              |
| PCP028544 | 9,28077077  | 9,08127038  | 9,22881869  | 9,086587411 | PCP028544 | XM_009343599 |
| PCP028568 | 9,978710459 | 10,14720492 | 9,767075406 | 8,961941603 | PCP028568 | XM_009345221 |
| PCP028576 | 12,33352716 | 12,31165467 | 12,42057346 | 12,76480319 | PCP028576 | XM_018651975 |
| PCP028593 | 9,591840209 | 9,687673116 | 9,765982204 | 10,03112222 | PCP028593 | XM_018647857 |
| PCP028626 | 9,797126495 | 10,1959873  | 9,914385132 | 10,02928723 | PCP028626 | XM_009345109 |
| PCP028724 | 9,175749131 | 9,259743264 | 9,353874607 | 9,684170024 | PCP028724 | XM_009359454 |
| PCP028832 | 9,921840937 | 9,922837094 | 9,952260754 | 10,28963853 | PCP028832 | XR_669371    |
| PCP028841 | 8,918863237 | 8,742578916 | 9,063395081 | 9,459431619 | PCP028841 | XM_018650906 |
| PCP028842 | 9,749316372 | 9,691743519 | 9,871905238 | 10,27806608 | PCP028842 | XM_009373796 |
| PCP028846 | 9,398038202 | 9,485829309 | 9,5980525   | 9,848106482 |           |              |
| PCP028853 | 8,682994584 | 8,795487741 | 8,855896288 | 9,232013125 |           |              |
| PCP028856 | 7,971543554 | 9,335390355 | 8,989621566 | 10,47471995 | PCP028856 | XM_009373824 |
| PCP028858 | 8,75598914  | 8,977279923 | 8,864186145 | 8,845490051 | PCP028858 | XR_001954347 |
| PCP028873 | 8,716545126 | 9,037080165 | 9,113742166 | 9,300741498 |           |              |
| PCP028884 | 9,564778269 | 9,427669021 | 9,702744108 | 9,819109312 |           |              |
| PCP028885 | 10,84809866 | 10,79496002 | 10,79305864 | 11,06317259 | PCP028885 | XM_009371666 |
| PCP028895 | 10,37503943 | 10,33539035 | 10,47302584 | 10,906139   |           |              |

|           |             |             |             |             |           |              |
|-----------|-------------|-------------|-------------|-------------|-----------|--------------|
| PCP028911 | 12,61800229 | 12,57214834 | 12,36723181 | 12,52601011 | PCP028911 | XM_009341623 |
| PCP028922 | 9,574271841 | 9,514378734 | 9,694653884 | 9,980139578 |           |              |
| PCP028932 | 8,912889336 | 8,957102042 | 8,863164132 | 8,804131021 | PCP028932 | XM_008343929 |
| PCP028936 | 10,9186173  | 10,95637616 | 11,02190302 | 11,32848981 | PCP028936 | XM_008355371 |
| PCP028946 | 11,77739095 | 11,80426415 | 11,35608327 | 11,14465824 | PCP028946 | XM_008355376 |
| PCP028959 | 10,35204343 | 10,27534467 | 10,34170783 | 10,6635581  | PCP028959 | XM_008343976 |
| PCP028972 | 11,4920184  | 11,28231817 | 11,32549098 | 11,50150383 | PCP028972 | XM_009337079 |
| PCP028973 | 13,79235006 | 13,57262089 | 13,60775451 | 13,76545912 | PCP028973 | XM_009337080 |
| PCP028976 | 11,3777528  | 11,38657926 | 11,41662338 | 11,3376219  | PCP028976 | XM_021962424 |
| PCP029008 | 10,95782756 | 11,16113188 | 11,08436329 | 11,19187968 | PCP029008 | XM_009335765 |
| PCP029027 | 8,807354922 | 8,827596761 | 8,960001932 | 8,740354199 | PCP029027 | XM_009358516 |
| PCP029037 | 9,836571147 | 9,750991645 | 9,986794882 | 10,15523567 | PCP029037 | XM_009358541 |
| PCP029042 | 9,055282436 | 9,083027168 | 9,299208018 | 9,533329732 | PCP029042 | XM_018647550 |
| PCP029046 | 9,004698008 | 8,941546519 | 8,733591606 | 8,84024291  |           |              |
| PCP029049 | 9,382991408 | 9,751544059 | 9,964817355 | 9,938594555 | PCP029049 | XM_018647551 |
| PCP029086 | 8,716545126 | 8,754887502 | 8,869347076 | 9,173252384 | PCP029086 | XM_009364793 |
| PCP029093 | 10,36158196 | 10,10328781 | 10,20863674 | 10,37937837 |           |              |
| PCP029098 | 9,643260955 | 9,842350343 | 9,911886285 | 10,71338651 | PCP029098 | XM_018651817 |
| PCP029102 | 8,91489335  | 8,895817605 | 8,888743249 | 9,478425839 | PCP029102 | XM_018648892 |
| PCP029105 | 11,74763496 | 11,49402052 | 11,62859591 | 11,76694294 | PCP029105 | XM_009354232 |
| PCP029117 | 9,075024475 | 9,248710343 | 9,122388003 | 9,244768161 | PCP029117 | XM_009354208 |
| PCP029118 | 9,539158811 | 9,378663341 | 9,422758607 | 10,07280253 | PCP029118 | XM_008354069 |
| PCP029130 | 9,705062108 | 9,787902559 | 9,997645247 | 9,864186145 |           |              |
| PCP029162 | 10,49818105 | 10,5526691  | 10,49452562 | 10,15355203 | PCP029162 | XM_009354572 |
| PCP029177 | 9,871905238 | 9,970105891 | 10,03846636 | 10,31288296 |           |              |
| PCP029187 | 9,215120395 | 9,255807556 | 9,376494429 | 9,756005825 | PCP029187 | XM_009346900 |
| PCP029191 | 11,68313937 | 11,75836065 | 11,7828631  | 11,81070417 | PCP029191 | XM_008349764 |
| PCP029197 | 9,987264012 | 9,950803736 | 10,16532158 | 10,55906156 |           |              |
| PCP029216 | 9,051671182 | 9,176597042 | 8,81483878  | 8,70276142  |           |              |
| PCP029217 | 10,19188584 | 10,1438041  | 10,34614803 | 10,89127487 |           |              |
| PCP029231 | 13,90174653 | 13,21366168 | 12,88385179 | 11,71195514 | PCP029231 | XM_008355376 |
| PCP029240 | 8,77478706  | 8,865207434 | 8,945443836 | 9,35974956  | PCP029240 | XM_008381747 |
| PCP029242 | 9,113742166 | 9,01402047  | 9,051671182 | 9,418548384 | PCP029242 | XM_009366918 |
| PCP029254 | 9,094526396 | 8,895817605 | 8,967716202 | 8,846524657 | PCP029254 | XM_009366938 |
| PCP029256 | 12,61279249 | 11,17409552 | 12,47581701 | 12,44086917 | PCP029256 | XM_009378962 |
| PCP029264 | 11,32399485 | 11,17409552 | 11,20457114 | 11,2959583  | PCP029264 | XM_009342851 |
| PCP029288 | 9,784094961 | 9,651051691 | 9,674774879 | 9,741466986 |           |              |
| PCP029317 | 9,730758817 | 9,605479518 | 9,77478706  | 9,534633604 | PCP029317 | XM_009352686 |
| PCP029326 | 13,94873224 | 13,88270704 | 13,70606427 | 13,78817488 | PCP029326 | XM_009352611 |
| PCP029327 | 8,731319031 | 8,716545126 | 8,851749041 | 9,223205318 | PCP029327 | XM_008394704 |
| PCP029330 | 9,884170519 | 9,891282469 | 10,03387721 | 10,5173446  | PCP029330 | XM_009352573 |
| PCP029336 | 10,4604559  | 10,61501344 | 10,55618989 | 10,14507876 | PCP029336 | XM_018647187 |
| PCP029338 | 9,821773982 | 9,883147293 | 9,99905574  | 9,866243459 | PCP029338 | XM_009356744 |
| PCP029345 | 10,30910114 | 10,34614803 | 10,5193119  | 10,44121164 |           |              |
| PCP029349 | 9,010304306 | 9,184057088 | 9,222384371 | 8,950322598 |           |              |
| PCP029362 | 10,72649918 | 10,55170826 | 10,44052662 | 10,54044774 | PCP029362 | XM_009381465 |

|           |             |             |             |             |           |              |
|-----------|-------------|-------------|-------------|-------------|-----------|--------------|
| PCP029387 | 9,027905997 | 9,216745858 | 9,293080746 | 9,520952554 |           |              |
| PCP029395 | 11,14444794 | 10,34281916 | 10,7067809  | 10,86056713 | PCP029395 | XM_009365678 |
| PCP029400 | 10,76514518 | 10,73527677 | 10,98347107 | 11,17783684 |           |              |
| PCP029403 | 9,736959959 | 9,842350343 | 9,981567282 | 10,2495046  | PCP029403 | XM_009365692 |
| PCP029405 | 9,864186145 | 9,782457711 | 9,786808699 | 9,761551232 | PCP029405 | XM_008356139 |
| PCP029420 | 8,593689902 | 8,904875427 | 9,28000515  | 9,70333261  |           |              |
| PCP029427 | 9,245552706 | 9,293080746 | 9,361943774 | 9,247927513 | PCP029427 | XM_008382565 |
| PCP029430 | 10,67360059 | 10,67271703 | 10,78026908 | 11,06137119 | PCP029430 | XR_530532    |
| PCP029443 | 9,258165557 | 9,159871337 | 9,118941073 | 9,079484784 | PCP029443 | XM_017335266 |
| PCP029457 | 8,806291831 | 9,001886668 | 9,244768161 | 9,915879379 | PCP029457 | XM_009356357 |
| PCP029475 | 9,028817757 | 9,047123912 | 9,142107057 | 9,506466274 | PCP029475 | XM_009347386 |
| PCP029481 | 9,692911856 | 9,60856902  | 9,774243476 | 10,26951244 |           |              |
| PCP029486 | 8,531381461 | 8,687655621 | 8,887738491 | 9,290018847 | PCP029486 | XM_018649627 |
| PCP029490 | 11,07503116 | 11,15755537 | 11,11113567 | 11,43289157 | PCP029490 | XM_008383313 |
| PCP029503 | 9,33911511  | 9,116343961 | 9,253445696 | 9,025139562 |           |              |
| PCP029506 | 9,783538504 | 9,726218159 | 9,784634846 | 10,10983065 |           |              |
| PCP029515 | 10,16867212 | 10,30947635 | 10,25068924 | 10,26678654 | PCP029515 | XM_009345954 |
| PCP029518 | 11,94422522 | 11,90701457 | 12,22198882 | 12,85142307 | PCP029518 | XM_009346662 |
| PCP029519 | 12,9938813  | 12,89330153 | 13,31037563 | 14,02011184 | PCP029519 | XM_009346655 |
| PCP029520 | 10,73555602 | 10,54850406 | 10,18074213 | 10,40372574 | PCP029520 | XM_018644892 |
| PCP029529 | 9,648051932 | 9,77807713  | 10,06787799 | 10,52779952 |           |              |
| PCP029535 | 9,244768161 | 9,40017499  | 9,383704292 | 9,795503976 | PCP029535 | XM_008342349 |
| PCP029545 | 8,923832563 | 8,959045612 | 8,957102042 | 8,911901261 |           |              |
| PCP029550 | 9,299963518 | 9,275356315 | 9,263668263 | 9,600526229 | PCP029550 | XM_009362942 |
| PCP029552 | 10,04484489 | 9,937623934 | 10,08524671 | 10,03250037 |           |              |
| PCP029567 | 8,75043902  | 8,765965634 | 8,957102042 | 9,84443901  | PCP029567 | XM_008378623 |
| PCP029575 | 11,42836017 | 11,46454575 | 11,38298601 | 11,44811631 |           |              |
| PCP029580 | 10,50548408 | 10,19311874 | 10,48984796 | 11,2179577  | PCP029580 | XR_001953260 |
| PCP029581 | 9,251884747 | 9,240791332 | 8,982993575 | 8,851749041 | PCP029581 | XM_009358955 |
| PCP029585 | 9,806823474 | 10,05708468 | 10,08347933 | 10,3623055  | PCP029585 | XM_008380340 |
| PCP029589 | 9,645063941 | 9,578051847 | 9,775330438 | 10,07414146 | PCP029589 | XM_008359330 |
| PCP029611 | 9,878556764 | 9,695802471 | 10,53559616 | 11,39178061 | PCP029611 | XM_009345150 |
| PCP029614 | 10,24118474 | 10,29270124 | 10,42030765 | 10,27574041 | PCP029614 | XM_018642585 |
| PCP029619 | 8,558420713 | 8,779161208 | 8,920858975 | 9,637838439 | PCP029619 | XM_009336251 |
| PCP029620 | 10,08702519 | 9,983463942 | 10,15692998 | 10,60671056 |           |              |
| PCP029636 | 10,01122726 | 10,50017464 | 10,4252159  | 11,8031907  | PCP029636 | XM_009346238 |
| PCP029660 | 9,873951581 | 10,07280253 | 10,20863674 | 10,48549727 | PCP029660 | XM_008345609 |
| PCP029661 | 9,124121312 | 9,076815597 | 9,2644426   | 9,074141463 | PCP029661 | XM_008345610 |
| PCP029662 | 10,07904471 | 9,936637939 | 9,947885279 | 9,722244002 | PCP029662 | XM_008383968 |
| PCP029739 | 10,3011189  | 10,45771945 | 10,46488265 | 10,52421847 | PCP029739 | XM_009360761 |
| PCP029756 | 8,872428639 | 9,047123912 | 9,206208529 | 9,396604781 | PCP029756 | XM_009356548 |
| PCP029764 | 9,775890069 | 9,725076497 | 9,652844973 | 9,965784285 | PCP029764 | XM_008366608 |
| PCP029769 | 9,01402047  | 9,2644426   | 9,156512913 | 9,286164981 | PCP029769 | XM_009339125 |
| PCP029770 | 8,892785649 | 8,880593701 | 8,932716728 | 9,588714636 |           |              |
| PCP029786 | 12,62258495 | 12,67168922 | 12,75565331 | 13,12648992 | PCP029786 | XM_008386294 |
| PCP029802 | 8,81483878  | 8,918863237 | 9,061587209 | 9,380093039 | PCP029802 | XM_008395768 |

|           |             |             |             |             |           |              |
|-----------|-------------|-------------|-------------|-------------|-----------|--------------|
| PCP029819 | 9,069664578 | 9,422758607 | 9,84862294  | 10,82839834 | PCP029819 | XM_009368568 |
| PCP029825 | 9,124974266 | 9,102421932 | 9,21916852  | 9,712527    |           |              |
| PCP029833 | 11,95274125 | 11,92283338 | 12,03399762 | 12,32998409 | PCP029833 | XM_009363531 |
| PCP029834 | 11,26659331 | 10,15734694 | 11,31458324 | 12,28549759 | PCP029834 | XR_001953532 |
| PCP029838 | 9,219967107 | 10,29653771 | 10,32530546 | 13,19352536 | PCP029838 | XM_009342691 |
| PCP029843 | 9,674774879 | 9,807354922 | 9,901877548 | 10,13869418 | PCP029843 | XM_009358895 |
| PCP029868 | 8,925791779 | 8,889747307 | 9,166589927 | 9,649256178 | PCP029868 | XM_008384884 |
| PCP029874 | 10,23801057 | 10,25541812 | 10,42870562 | 10,64446019 |           |              |
| PCP029877 | 11,01471793 | 11,07881795 | 11,08790699 | 10,86108691 |           |              |
| PCP029879 | 10,04984855 | 10,53689798 | 10,5101015  | 9,758772867 | PCP029879 | XM_009377605 |
| PCP029897 | 8,884689491 | 9,02699366  | 8,946409212 | 8,871381646 |           |              |
| PCP029909 | 9,067891433 | 9,010304306 | 9,118084543 | 9,47100451  | PCP029909 | XM_009362538 |
| PCP029910 | 11,83578594 | 12,03353657 | 12,10131915 | 12,46130805 | PCP029910 | XM_009362536 |
| PCP029912 | 8,934663924 | 8,926800034 | 8,985841937 | 9,405843489 | PCP029912 | XM_009365060 |
| PCP029941 | 8,655816908 | 8,60855054  | 9,265216522 | 8,819125283 | PCP029941 | XM_008393980 |
| PCP029948 | 10,65880951 | 10,63390341 | 10,54946703 | 10,77313921 | PCP029948 | XM_009381238 |
| PCP029966 | 9,206208529 | 9,310612782 | 9,450530824 | 9,81805485  | PCP029966 | XM_009348233 |
| PCP029997 | 10,8917837  | 11,18838485 | 11,03937833 | 10,65731845 | PCP029997 | XM_009371229 |
| PCP030023 | 10,22641219 | 10,12066557 | 10,25777675 | 10,60979743 | PCP030023 | XM_008346182 |
| PCP030037 | 9,833411948 | 9,884674229 | 9,990572019 | 10,33650656 | PCP030037 | XM_009340469 |
| PCP030065 | 10,04712391 | 9,90287251  | 10,02375435 | 9,144658243 |           |              |
| PCP030076 | 10,99270471 | 10,78463485 | 10,83815604 | 10,24079133 | PCP030076 | XM_009379206 |
| PCP030097 | 9,927289081 | 9,784634846 | 9,791162889 | 10,12970803 | PCP030097 | XM_009360074 |
| PCP030098 | 13,16553514 | 12,50729912 | 12,7373889  | 12,84542536 | PCP030098 | XM_009369549 |
| PCP030115 | 9,73753467  | 9,905883363 | 10,01541505 | 10,3479867  | PCP030115 | XM_009352085 |
| PCP030165 | 13,3256807  | 13,321036   | 13,26405108 | 13,37132335 | PCP030165 | XM_009367147 |
| PCP030207 | 11,04485172 | 10,3786525  | 9,618991087 | 9,509775004 | PCP030207 | XM_008355283 |
| PCP030268 | 10,27767098 | 10,20294414 | 10,78653919 | 10,34983409 |           |              |
| PCP030312 | 10,93024207 | 11,22057785 | 11,2380046  | 11,99964774 | PCP030312 | XM_009341766 |
| PCP030330 | 10,69145565 | 11,00515433 | 10,9168722  | 11,215533   | PCP030330 | XM_009355881 |
| PCP030349 | 9,342074668 | 9,454648871 | 9,285402219 | 8,916864735 | PCP030349 | XM_009357450 |
| PCP030351 | 12,03514275 | 11,95601308 | 11,9906961  | 11,83539121 |           |              |
| PCP030401 | 9           | 9,221587121 | 9,253445696 | 9,136145235 | PCP030401 | XM_018642518 |
| PCP030409 | 9,831307244 | 9,689997971 | 9,782998209 | 9,799281622 |           |              |
| PCP030413 | 10,2510918  | 10,2219858  | 10,13741386 | 10,18404469 | PCP030413 | XM_018651569 |
| PCP030432 | 9,500503319 | 9,419264989 | 9,780818601 | 10,21714588 |           |              |
| PCP030436 | 8,21757002  | 8,540438054 | 9,420655031 | 9,37286506  | PCP030436 | XM_008367278 |
| PCP030454 | 9,623277955 | 9,591204414 | 9,939579214 | 10,51142653 | PCP030454 | XM_009362447 |
| PCP030456 | 10,51142653 | 10,54528307 | 10,5666915  | 10,50812159 |           |              |
| PCP030482 | 9,026053072 | 9,017727086 | 9,110274492 | 9,002815016 |           |              |
| PCP030510 | 9,78026088  | 9,898858314 | 9,915879379 | 9,837107523 | PCP030510 | XM_009365249 |
| PCP030515 | 8,76927586  | 8,872428639 | 8,947403166 | 9,47100451  | PCP030515 | NM_001293876 |
| PCP030518 | 9,179088013 | 9,340584522 | 9,55011186  | 9,446400988 | PCP030518 | XM_018643861 |
| PCP030537 | 10,49218368 | 10,36120908 | 10,203348   | 10,51471405 | PCP030537 | XM_018643956 |
| PCP030542 | 10,35828856 | 10,46658634 | 10,60239267 | 10,75849807 |           |              |
| PCP030544 | 10,68299458 | 10,70936819 | 10,74483384 | 10,77561028 | PCP030544 | XM_009369278 |

|           |             |             |             |             |           |              |
|-----------|-------------|-------------|-------------|-------------|-----------|--------------|
| PCP030555 | 12,2217895  | 12,47969691 | 12,67632516 | 14,04860011 | PCP030555 | XM_018645678 |
| PCP030576 | 9,994353437 | 10,11026144 | 10,169925   | 10,39124359 | PCP030576 | XM_008352731 |
| PCP030592 | 9,782457711 | 10,06653324 | 10,17033821 | 10,68796174 | PCP030592 | XM_009341858 |
| PCP030595 | 10,36850646 | 10,32380913 | 10,44224893 | 10,7128107  | PCP030595 | XM_009341910 |
| PCP030598 | 9,364856916 | 9,161560218 | 9,349458168 | 9,622655867 |           |              |
| PCP030599 | 8,856954575 | 9,096267125 | 9,158180476 | 9,649256178 | PCP030599 | XM_009341987 |
| PCP030602 | 9,138706975 | 9,124121312 | 9,4325419   | 9,691743519 | PCP030602 | XM_008388014 |
| PCP030605 | 9,701601036 | 9,685922633 | 10,04848687 | 10,32605865 | PCP030605 | XM_009342106 |
| PCP030607 | 9,830245815 | 9,604238155 | 9,806275718 | 9,696393811 |           |              |
| PCP030614 | 9,363412032 | 9,327170869 | 9,352418676 | 9,930249459 | PCP030614 | XM_008392758 |
| PCP030615 | 8,548166865 | 9,119797095 | 9,347997771 | 9,436024381 |           |              |
| PCP030634 | 7,462134139 | 8,524855097 | 8,95419631  | 12,21785776 | PCP030634 | XR_668418    |
| PCP030688 | 11,57380338 | 11,42975717 | 11,44000225 | 11,53673289 | PCP030688 | XM_009341731 |
| PCP030706 | 9,407968756 | 9,090985714 | 9,246336825 | 8,977279923 | PCP030706 | XM_009349312 |
| PCP030727 | 9,437398376 | 9,459431619 | 9,255807556 | 9,039823818 | PCP030727 | XM_009353361 |
| PCP030740 | 9,33911511  | 9,094526396 | 9,064284694 | 8,68183575  | PCP030740 | XM_008342317 |
| PCP030751 | 9,630576566 | 9,58370335  | 9,533972085 | 9,546257836 | PCP030751 | XM_009353326 |
| PCP030767 | 9,336885873 | 8,987747198 | 8,963849777 | 9,538518764 | PCP030767 | XM_017336014 |
| PCP030771 | 9,701601036 | 9,689997971 | 9,652253436 | 9,47100451  | PCP030771 | XM_008390348 |
| PCP030784 | 10,96818437 | 10,54303182 | 10,57679609 | 10,42940674 |           |              |
| PCP030785 | 9,696967526 | 9,890765865 | 9,158180476 | 9,813781191 |           |              |
| PCP030796 | 8,922822231 | 8,988684687 | 9,106772296 | 9,637222599 |           |              |
| PCP030800 | 9,327934318 | 9,429762402 | 9,657622143 | 9,698131642 | PCP030800 | XM_017325722 |
| PCP030810 | 8,678318438 | 8,969616759 | 9,066977144 | 9,477090385 | PCP030810 | XM_008380884 |
| PCP030829 | 9,6171552   | 9,717110885 | 9,768730196 | 9,396604781 | PCP030829 | XM_009355581 |
| PCP030833 | 14,58386609 | 14,13003396 | 14,1126024  | 13,7111292  |           |              |
| PCP030844 | 9,040755473 | 9,010304306 | 8,97441459  | 8,909893084 | PCP030844 | XM_009339292 |
| PCP030859 | 9,762664404 | 10,23002044 | 10,3064377  | 10,32418055 | PCP030859 | XM_009371940 |
| PCP030874 | 9,618385502 | 9,770944642 | 9,571126898 | 9,201315296 |           |              |
| PCP030879 | 10,4419067  | 10,2644426  | 10,39802751 | 10,25935488 | PCP030879 | XM_008356700 |
| PCP030891 | 10,82654849 | 10,95201316 | 11,0945198  | 11,25207404 | PCP030891 | XM_018647857 |
| PCP030939 | 9,178241565 | 9,193106413 | 9,204571144 | 9,588714636 |           |              |
| PCP030965 | 10,71653655 | 10,36194377 | 10,1382718  | 10,58934217 |           |              |
| PCP030969 | 9,870873272 | 9,971069283 | 9,991054099 | 9,967226259 | PCP030969 | XM_008362946 |
| PCP030994 | 10,33091688 | 10,27496047 | 10,26757091 | 10,26091953 | PCP030994 | XM_008381818 |
| PCP030998 | 9,28077077  | 9,352418676 | 9,618991087 | 9,477758266 | PCP030998 | NM_001328845 |
| PCP031008 | 9,334653186 | 9,301496195 | 9,217545787 | 9,18157469  |           |              |
| PCP031013 | 12,3858624  | 12,61562964 | 12,58355293 | 12,4301049  | PCP031013 | XM_018649546 |
| PCP031026 | 10,73301532 | 10,22400167 | 10,63541885 | 10,81644771 | PCP031026 | XM_009368350 |
| PCP031030 | 11,12971447 | 10,73921523 | 11,17762509 | 11,33799535 | PCP031030 | XM_009379255 |
| PCP031031 | 10,5533125  | 10,44570808 | 10,61868833 | 10,41327885 |           |              |
| PCP031065 | 9,344295908 | 9,145499145 | 9,515049296 | 9,637838439 | PCP031065 | XM_009358688 |
| PCP031090 | 9,232013125 | 9,141264175 | 9,162391329 | 9,202931899 | PCP031090 | XM_009364604 |
| PCP031098 | 11,28847969 | 11,17659081 | 11,48163296 | 11,8163157  | PCP031098 | XM_009380877 |
| PCP031115 | 9,983463942 | 9,92381771  | 9,987732989 | 10,31288296 | PCP031115 | XM_009360071 |
| PCP031134 | 11,17679648 | 11,50382574 | 11,54012804 | 11,49685378 | PCP031134 | XM_009370350 |

|           |             |             |             |             |           |              |
|-----------|-------------|-------------|-------------|-------------|-----------|--------------|
| PCP031139 | 9,742595757 | 9,691167722 | 9,835529375 | 9,651051691 |           |              |
| PCP031156 | 8,78571401  | 8,863164132 | 9,320416982 | 9,431142371 | PCP031156 | XM_009338084 |
| PCP031157 | 11,78762917 | 11,76404222 | 11,69827058 | 12,02848282 | PCP031157 | XM_009338086 |
| PCP031166 | 9,052568051 | 9,2589664   | 9,19063955  | 9,561612539 | PCP031166 | XM_009381012 |
| PCP031172 | 10,08480839 | 10,08391805 | 10,29232163 | 10,69522829 |           |              |
| PCP031177 | 9,657014692 | 9,90287251  | 10,16574867 | 10,63178639 |           |              |
| PCP031185 | 10,61010206 | 10,39446269 | 10,34021731 | 10,69494112 | PCP031185 | XM_008353586 |
| PCP031200 | 9,505811554 | 9,515049296 | 9,299963518 | 9,453270634 | PCP031200 | XM_016796525 |
| PCP031216 | 9,124121312 | 9,274564521 | 9,475064611 | 9,991521846 | PCP031216 | XM_009366079 |
| PCP031235 | 10,50315988 | 10,603005   | 10,64536122 | 10,92555444 |           |              |
| PCP031236 | 9,08833774  | 9,395169935 | 9,251884747 | 9,532024681 |           |              |
| PCP031260 | 9,681818185 | 9,20701432  | 9,424166289 | 9,452591317 | PCP031260 | XR_668417    |
| PCP031263 | 9,662970945 | 9,725655961 | 9,931727372 | 10,19311874 | PCP031263 | XM_009367964 |
| PCP031277 | 11,4238145  | 11,70173964 | 12,21937123 | 12,68547811 | PCP031277 | XM_008367804 |
| PCP031281 | 10,34244141 | 10,20375175 | 10,07503785 | 9,614709844 | PCP031281 | XM_008368835 |
| PCP031291 | 10,45943162 | 10,52649924 | 10,51076417 | 10,47370575 |           |              |
| PCP031300 | 8,965784285 | 8,915879379 | 9,140395236 | 9,664749481 | PCP031300 | XM_008375558 |
| PCP031301 | 10,43844881 | 10,42101286 | 10,46828802 | 10,93957921 |           |              |
| PCP031304 | 10,11286951 | 9,922837094 | 10,07725635 | 10,29997496 | PCP031304 | XM_009340269 |
| PCP031305 | 10,56255726 | 10,50581155 | 10,61868833 | 10,85823749 | PCP031305 | XM_009372672 |
| PCP031307 | 9,108524457 | 9,075024475 | 9,257387843 | 9,57680554  | PCP031307 | XM_018651811 |
| PCP031308 | 9,441554026 | 9,479780264 | 9,982523054 | 9,986311377 | PCP031308 | XM_018651810 |
| PCP031358 | 9,840258649 | 9,805743872 | 10,03250037 | 10,4429435  | PCP031358 | XM_009372812 |
| PCP031360 | 9,390878304 | 9,442943496 | 9,645063941 | 9,892800824 | PCP031360 | XM_009375329 |
| PCP031396 | 9,02699366  | 9,209453366 | 9,468970167 | 9,580578921 | PCP031396 | XM_009356749 |
| PCP031402 | 8,992456886 | 8,968666793 | 9,10938668  | 9,468277836 | PCP031402 | XM_018650263 |
| PCP031409 | 11,64700864 | 11,69551976 | 11,71610351 | 11,98702591 |           |              |
| PCP031422 | 10,32418055 | 10,37032778 | 10,29039906 | 10,36558975 | PCP031422 | XM_009379893 |
| PCP031426 | 10,78681687 | 10,84287672 | 10,85149139 | 10,91936243 | PCP031426 | XM_008382512 |
| PCP031445 | 9,320416982 | 9,402308618 | 9,456703495 | 9,332417038 | PCP031445 | XM_008360225 |
| PCP031447 | 8,911901261 | 8,819125283 | 8,978224236 | 9,475733431 | PCP031447 | XM_018646091 |
| PCP031449 | 10,41961263 | 10,4419067  | 10,44121164 | 10,4307975  | PCP031449 | XR_001951836 |
| PCP031468 | 10,01865921 | 10,45155114 | 10,43532647 | 10,37177664 |           |              |
| PCP031481 | 8,856954575 | 8,975360779 | 8,925791779 | 8,860062694 | PCP031481 | XM_018651795 |
| PCP031523 | 11,21431912 | 11,13293022 | 11,17200864 | 11,21087221 | PCP031523 | XM_009379374 |
| PCP031534 | 10,01726776 | 9,840258649 | 9,946423834 | 10,52388535 |           |              |
| PCP031552 | 9,151447887 | 9,202123824 | 9,395169935 | 9,791700135 | PCP031552 | XM_009380701 |
| PCP031553 | 13,13517539 | 12,88760142 | 13,08707659 | 13,33636708 |           |              |
| PCP031577 | 9,207819661 | 9,393755108 | 9,293862446 | 9,350939182 | PCP031577 | XM_008387088 |
| PCP031718 | 9,706789535 | 9,44362737  | 9,417852515 | 9,440183984 | PCP031718 | XM_009341767 |
| PCP031886 | 10,3200446  | 10,46624984 | 10,3305472  | 10,71681946 |           |              |
| PCP031889 | 11,58965115 | 11,70144942 | 11,73569563 | 12,26883437 |           |              |
| PCP031895 | 9,661778098 | 9,340584522 | 9,537859025 | 9,82866014  | PCP031895 | XM_018646058 |
| PCP031941 | 9,451211112 | 9,752664976 | 9,772595002 | 9,905883363 |           |              |
| PCP031963 | 9,116343961 | 9,157346935 | 9,30986284  | 9,743706817 | PCP031963 | XM_009377271 |
| PCP031978 | 10,82813648 | 10,87728413 | 10,82892983 | 10,86289302 |           |              |

|           |             |             |             |             |           |              |
|-----------|-------------|-------------|-------------|-------------|-----------|--------------|
| PCP031996 | 9,537859025 | 9,621447519 | 9,497193195 | 9,552035018 | PCP031996 | XM_018652140 |
| PCP032024 | 11,03204573 | 10,65702363 | 10,74034577 | 10,69522829 |           |              |
| PCP032041 | 9,794415866 | 9,855911856 | 9,849139214 | 9,848106482 | PCP032041 | XM_009338650 |
| PCP032108 | 9,004698008 | 9,053464362 | 9,037080165 | 8,941546519 |           |              |
| PCP032112 | 9,618385502 | 9,541096615 | 9,668299989 | 8,671257984 | PCP032112 | XM_008350577 |
| PCP032125 | 10,54399845 | 10,43115282 | 10,57206541 | 10,83447105 | PCP032125 | XM_009351502 |
| PCP032137 | 9,556506055 | 9,400879436 | 9,607330314 | 9,982038114 |           |              |
| PCP032168 | 10,10372055 | 10,37793712 | 10,26951244 | 10,29001885 | PCP032168 | XM_009337959 |
| PCP032285 | 11,07926476 | 11,18446007 | 11,18363538 | 11,25029842 | PCP032285 | XM_009357953 |
| PCP032325 | 12,91849059 | 12,78613279 | 12,91469718 | 12,79705352 | PCP032325 | XM_009358786 |
| PCP032426 | 9,721099189 | 9,707928505 | 9,896831887 | 10,20252792 | PCP032426 | XM_009362120 |
| PCP032427 | 12,92851838 | 13,13083919 | 13,23017058 | 13,46718139 | PCP032427 | XM_009362119 |
| PCP032549 | 13,37910757 | 13,14412765 | 13,18280867 | 13,53097565 | PCP032549 | XM_009366892 |
| PCP032611 | 11,05030442 | 10,99104701 | 11,01866616 | 10,94860815 | PCP032611 | XM_008340344 |
| PCP032736 | 10,12713025 | 10,66593099 | 10,60146439 | 10,76680218 | PCP032736 | XM_009337907 |
| PCP032784 | 11,77561028 | 11,5943246  | 11,86534664 | 12,12066881 | PCP032784 | XM_009360370 |
| PCP032824 | 9,739223673 | 9,876516947 | 10,15270314 | 10,26130749 | PCP032824 | XM_009341393 |
| PCP032847 | 10,77971936 | 10,43532647 | 10,45429929 | 10,91761823 | PCP032847 | XM_009344811 |
| PCP032877 | 9,822299952 | 9,667111542 | 9,785174528 | 9,721099189 | PCP032877 | XM_009357866 |
| PCP032883 | 9,855911856 | 9,898858314 | 9,940563202 | 10,25068924 |           |              |
| PCP032928 | 8,820178962 | 8,692336525 | 9,024225474 | 9,232013125 | PCP032928 | XM_009368091 |
| PCP033033 | 9,42485912  | 10,77505877 | 9,10938668  | 9,112882543 |           |              |
| PCP033076 | 11,99776872 | 11,89746734 | 12,05403785 | 12,31146452 | PCP033076 | XM_009372631 |
| PCP033145 | 11,0425691  | 10,96457913 | 11,22319928 | 11,41309898 | PCP033145 | XR_664847    |
| PCP033148 | 9,928770029 | 10,14168568 | 10,0692215  | 10,4325419  | PCP033148 | XM_009359409 |
| PCP033155 | 11,71953    | 11,77780187 | 11,82760867 | 12,20344895 | PCP033155 | XM_009337634 |
| PCP033179 | 9,010304306 | 8,87036472  | 8,791162889 | 8,74819285  | PCP033179 | XM_009347081 |
| PCP033196 | 9,097163045 | 9,188168462 | 9,63540978  | 9,632395464 | PCP033196 | XM_018642793 |
| PCP033208 | 9,482465137 | 9,599299194 | 9,702172685 | 9,943496494 |           |              |
| PCP033212 | 9,113742166 | 9,103287808 | 9,274564521 | 9,525520809 | PCP033212 | XM_009353501 |
| PCP033216 | 10,57238759 | 10,66029011 | 11,14508513 | 11,80587685 | PCP033216 | XM_009373638 |
| PCP033237 | 9,075024475 | 8,853839746 | 9,017727086 | 9,375756255 | PCP033237 | XM_008357384 |
| PCP033443 | 9,944463173 | 9,945926605 | 10,11591499 | 10,05572982 |           |              |
| PCP033444 | 9,52028473  | 9,083027168 | 9,298452123 | 9,548821908 | PCP033444 | XM_009344863 |
| PCP033451 | 10,24555271 | 10,53850906 | 10,77093639 | 11,30245044 | PCP033451 | XM_018643552 |
| PCP033494 | 10,57806128 | 10,6972543  | 10,64475759 | 11,11525828 |           |              |
| PCP033537 | 9,097163045 | 9,229611955 | 8,993419626 | 8,933690655 | PCP033537 | XM_009345298 |
| PCP033547 | 8,839203788 | 8,995286644 | 9,067891433 | 9,395169935 |           |              |
| PCP033606 | 9,591840209 | 9,563520437 | 9,636624621 | 9,433940073 | PCP033606 | XM_009350052 |
| PCP033690 | 11,02120903 | 11,41749918 | 11,39838565 | 12,02017089 | PCP033690 | XM_009353884 |
| PCP033703 | 9,548186135 | 10,01076585 | 9,775330438 | 10,48951685 | PCP033703 | XM_009359512 |
| PCP033732 | 11,2072157  | 10,80170836 | 11,22641219 | 11,84392105 | PCP033732 | XM_018649862 |
| PCP033774 | 8,686500527 | 9,247927513 | 9,038013592 | 9,169098221 | PCP033774 | XM_009364972 |
| PCP033840 | 8,548166865 | 8,758223215 | 9,034331283 | 9,525520809 | PCP033840 | XM_018649864 |
| PCP033872 | 11,07325121 | 11,09495518 | 11,09275714 | 11,44207783 |           |              |
| PCP033926 | 11,72891112 | 11,54206454 | 11,73188327 | 12,0166934  | PCP033926 | NM_001294121 |



|           |             |             |             |             |           |              |
|-----------|-------------|-------------|-------------|-------------|-----------|--------------|
| PCP033927 | 9,820178962 | 9,636624621 | 9,824958741 | 10,03250037 | PCP033927 | XM_008394295 |
| PCP033970 | 9,250298418 | 9,316666199 | 9,202123824 | 9,027905997 | PCP033970 | XR_001952506 |
| PCP034107 | 10,64685568 | 10,63723166 | 11,24891784 | 11,69913863 | PCP034107 | XM_018652271 |
| PCP034115 | 8,28077077  | 8,698114274 | 9,038013592 | 9,636026394 | PCP034115 | XM_008341770 |
| PCP034117 | 10,20539007 | 10,21431912 | 10,21431912 | 10,21714588 | PCP034117 | XM_017323738 |
| PCP034151 | 9,306813609 | 9,236803511 | 8,889747307 | 8,70276142  | PCP034151 | XM_008385565 |
| PCP034171 | 8,886702554 | 9           | 9,201315296 | 9,497851837 |           |              |
| PCP034173 | 10,4153932  | 10,35388563 | 10,2510918  | 10,7299011  | PCP034173 | XR_667312    |
| PCP034181 | 8,614709844 | 8,903881846 | 9,297672907 | 9,607940556 | PCP034181 | XM_009374293 |
| PCP034239 | 9,113742166 | 8,9905862   | 9,189009107 | 8,988684687 | PCP034239 | XM_009375779 |
| PCP034245 | 9,422064766 | 9,354624059 | 9,99859043  | 11,97835296 | PCP034245 | XM_021978226 |
| PCP034370 | 10,78681687 | 10,82097669 | 10,87958325 | 11,38424412 |           |              |
| PCP034384 | 12,03891899 | 12,02074734 | 12,14402087 | 12,46913302 |           |              |
| PCP034386 | 10,09054913 | 10,25974326 | 10,31929955 | 9,977279923 | PCP034386 | XM_008340674 |
| PCP034391 | 10,25699883 | 10,21916852 | 10,24911345 | 10,64655871 |           |              |
| PCP034393 | 8,645045922 | 8,628153873 | 8,696967526 | 9,448467384 |           |              |
| PCP034394 | 8,77148947  | 8,84024291  | 9,033423002 | 9,594940371 |           |              |
| PCP034415 | 8,706219712 | 8,862110391 | 8,95805965  | 9,333893285 |           |              |
| PCP034422 | 12,07202204 | 11,95080009 | 11,96024453 | 11,45069577 | PCP034422 | XM_009347509 |
| PCP034439 | 8,889747307 | 9,164906927 | 9,051671182 | 9,438791853 | PCP034439 | XM_009365102 |
| PCP034444 | 9,750991645 | 9,670656249 | 9,880088564 | 10,18280401 | PCP034444 | XM_009365241 |
| PCP034458 | 9,148044344 | 9,106772296 | 9,069664578 | 8,984902599 | PCP034458 | XM_009355353 |
| PCP034470 | 9,183213552 | 9,665922115 | 9,880609006 | 10,06474276 | PCP034470 | XM_009372829 |
| PCP034502 | 9,194756854 | 9,208648936 | 9,411510988 | 9,747639151 |           |              |
| PCP034512 | 11,27068661 | 11,27165561 | 11,32624408 | 11,268542   |           |              |
| PCP034653 | 10,78026908 | 10,85174904 | 10,79873909 | 10,84679886 | PCP034653 | XM_009379936 |
| PCP034659 | 9,754336368 | 9,463524373 | 9,84757418  | 9,785174528 |           |              |
| PCP034694 | 13,80980128 | 13,45103978 | 13,6998251  | 13,84490188 | PCP034694 | XM_009350086 |
| PCP034702 | 9,189009107 | 9,113742166 | 9,131008067 | 9,46760555  | PCP034702 | XM_008374418 |
| PCP034758 | 8,660602089 | 8,675957033 | 8,886702554 | 9,461479447 | PCP034758 | XM_017323276 |
| PCP034945 | 10,82390059 | 10,82787459 | 10,8574601  | 11,36157648 |           |              |
| PCP034959 | 9,546257836 | 7,324900589 | 9,552035018 | 9,001886668 |           |              |
| PCP034992 | 10,21067134 | 10,18735207 | 10,47302584 | 10,35974956 |           |              |
| PCP035015 | 10,03983752 | 10,01865921 | 9,968191576 | 10,26600174 | PCP035015 | XM_009365834 |
| PCP035024 | 12,84156435 | 12,5574637  | 12,65381466 | 12,76203524 | PCP035024 | XM_018645916 |
| PCP035025 | 11,50564783 | 11,61148594 | 11,7300455  | 12,53576138 |           |              |
| PCP035033 | 9,318158642 | 9,214319121 | 9,213517401 | 9,553302899 |           |              |
| PCP035099 | 9,692911856 | 9,792790294 | 10,02236781 | 10,36814629 | PCP035099 | XM_009354240 |
| PCP035118 | 9,799815854 | 9,961927137 | 10,12627857 | 10,64595559 |           |              |
| PCP035130 | 14,12169539 | 13,89494373 | 13,91089284 | 13,94626664 | PCP035130 | XM_018648701 |
| PCP035151 | 10,37539789 | 10,40832974 | 10,44777547 | 10,8917837  | PCP035151 | XM_009350132 |
| PCP035216 | 9,541096615 | 9,529430554 | 9,791700135 | 10,15440043 | PCP035216 | NM_001294071 |
| PCP035259 | 9,709652505 | 9,426956579 | 9,529430554 | 9,906394584 |           |              |
| PCP035302 | 10,488513   | 10,48280796 | 10,5291084  | 11,04280163 | PCP035302 | XM_009340172 |
| PCP035325 | 9,207819661 | 9,024225474 | 8,909893084 | 9,003742767 | PCP035325 | XM_009362877 |
| PCP035387 | 9,507140523 | 9,398038202 | 9,614102459 | 9,856425529 | PCP035387 | XM_009346341 |

|           |             |             |             |             |           |              |
|-----------|-------------|-------------|-------------|-------------|-----------|--------------|
| PCP035393 | 9,265216522 | 8,995286644 | 9,193944186 | 9,202123824 |           |              |
| PCP035412 | 9,312134193 | 9,169925001 | 8,977279923 | 8,904875427 | PCP035412 | XM_008396074 |
| PCP035432 | 9,314401976 | 9,312134193 | 9,571126898 | 9,917372079 |           |              |
| PCP035462 | 10,94641652 | 11,91786806 | 11,66563349 | 12,19670355 | PCP035462 | XM_009381288 |
| PCP035546 | 11,53931878 | 11,36121457 | 11,78667803 | 12,84575073 |           |              |
| PCP035557 | 9,048023611 | 9,113742166 | 9,378663341 | 9,517669388 | PCP035557 | XM_009339476 |
| PCP035558 | 9,553955615 | 9,46760555  | 9,606090543 | 9,895832748 |           |              |
| PCP035631 | 9,177419538 | 9,466239641 | 9,568583198 | 10,26365653 | PCP035631 | XM_009368990 |
| PCP035647 | 9,121533517 | 9,208648936 | 9,332417038 | 9,811647632 | PCP035647 | XM_009374629 |
| PCP035851 | 10,0962803  | 9,511100329 | 9,735268302 | 9,694653884 |           |              |
| PCP035884 | 9,70333261  | 9,877023336 | 9,960972093 | 10,44845706 | PCP035884 | XM_009336923 |
| PCP035895 | 12,72664392 | 13,22641219 | 12,77561028 | 13,44858998 | PCP035895 | NM_001302302 |
| PCP035898 | 10,89405985 | 11,08347933 | 11,00609461 | 11,36121457 | PCP035898 | XM_009365589 |
| PCP035907 | 9,445697739 | 9,363412032 | 9,462849868 | 9,429762402 | PCP035907 | XM_009375374 |
| PCP035910 | 9,396604781 | 9,345782228 | 9,484480553 | 9,032514148 | PCP035910 | XM_008365958 |
| PCP035921 | 9,219967107 | 9,184057088 | 9,356077767 | 9,594324604 |           |              |
| PCP035930 | 9,574915142 | 9,634212071 | 9,526166647 | 9,471675214 |           |              |
| PCP035932 | 10,29806257 | 10,69696753 | 10,70015358 | 11,18652903 | PCP035932 | XM_009341641 |
| PCP036007 | 9,251079962 | 8,901862467 | 8,731319031 | 8,581200582 | PCP036007 | XM_018651156 |
| PCP036047 | 9,531381461 | 9,7409107   | 9,7409107   | 10,19269967 | PCP036047 | XM_009353874 |
| PCP036155 | 8,649866903 | 8,742578916 | 8,866258916 | 9,233619677 | PCP036155 | XM_009343105 |
| PCP036161 | 9,804663461 | 9,566054038 | 9,830784548 | 10,0923211  |           |              |
| PCP036169 | 10,89254282 | 10,75461196 | 10,86933936 | 11,18281022 | PCP036169 | XM_009355517 |
| PCP036303 | 8,722226922 | 8,833933692 | 8,982993575 | 8,82336724  |           |              |
| PCP036312 | 10,02559639 | 9,816455711 | 9,882138629 | 10,01076585 | PCP036312 | XM_009347985 |
| PCP036361 | 10,56985561 | 10,18694371 | 10,80035798 | 11,19085557 | PCP036361 | XM_009337016 |
| PCP036378 | 9,254249162 | 9,192292814 | 9,2644426   | 9,765982204 | PCP036378 | XM_008384313 |
| PCP036479 | 10,15481811 | 10,06653324 | 9,970580478 | 10,20252792 |           |              |
| PCP036481 | 8,596189756 | 8,839203788 | 9,09011242  | 8,905898402 | PCP036481 | XR_524149    |
| PCP036534 | 11,12131982 | 10,89127487 | 11,02721489 | 11,26931957 | PCP036534 | XM_009376878 |
| PCP036557 | 9,325687724 | 9,395898244 | 9,350939182 | 9,377926277 |           |              |
| PCP036558 | 9,075024475 | 8,959045612 | 8,970594857 | 8,85277917  | PCP036558 | XM_009337547 |
| PCP036562 | 9,445697739 | 9,642647426 | 9,714812179 | 9,886717794 | PCP036562 | XM_008343320 |
| PCP036643 | 9,131856961 | 9,08127038  | 9,419960178 | 8,855896288 |           |              |
| PCP036765 | 10,1015424  | 10,05483491 | 10,25974326 | 10,47370575 | PCP036765 | XM_009362766 |
| PCP036805 | 9,160703421 | 8,832890014 | 8,919846558 | 9,223205318 | PCP036805 | XM_009336367 |
| PCP036814 | 9,019590728 | 8,900866808 | 8,942514505 | 8,791162889 | PCP036814 | XM_009336772 |
| PCP036877 | 10,62632049 | 10,59121377 | 10,73075033 | 10,9580669  | PCP036877 | XM_009364445 |
| PCP036886 | 11,20028561 | 11,49452062 | 11,41168575 | 11,76016688 | PCP036886 | XM_009338599 |
| PCP037129 | 9,063395081 | 8,783554874 | 8,982993575 | 9,649256178 | PCP037129 | XM_009342166 |
| PCP037138 | 10,49652427 | 10,49984589 | 10,60021957 | 10,92753354 |           |              |
| PCP037284 | 10,17700835 | 10,01308535 | 10,32830467 | 10,42241173 | PCP037284 | XM_009356785 |
| PCP037299 | 9,718823954 | 9,371406396 | 9,760437201 | 9,382256552 | PCP037299 | XM_009381294 |
| PCP037309 | 10,29576893 | 10,38118602 | 10,31288296 | 10,62965715 |           |              |
| PCP037432 | 10,33985    | 10,39874369 | 10,4767462  | 10,78681687 | PCP037432 | XM_008392157 |
| PCP037479 | 9,00750388  | 9,08833774  | 9,642051693 | 10,3376219  | PCP037479 | XM_009354230 |

|           |             |             |             |             |           |              |
|-----------|-------------|-------------|-------------|-------------|-----------|--------------|
| PCP037501 | 10,06114164 | 10,07547915 | 10,10852446 | 10,42556211 | PCP037501 | XR_514408    |
| PCP037505 | 9,245552706 | 9,329415156 | 9,327934318 | 9,966260295 | PCP037505 | XM_009378963 |
| PCP037522 | 12,08702188 | 12,20436634 | 12,31675387 | 12,28867289 | PCP037522 | XM_008386853 |
| PCP037523 | 9,367786025 | 9,140395236 | 9,240004193 | 8,909893084 | PCP037523 | XM_009365667 |
| PCP037560 | 10,85044472 | 10,61440618 | 10,71681946 | 10,78708632 | PCP037560 | XM_009358949 |
| PCP037720 | 12,55042695 | 11,98216293 | 10,98513037 | 12,60779264 |           |              |
| PCP037779 | 10,31741261 | 9,225617167 | 9,794951903 | 9,045295522 |           |              |
| PCP037788 | 9,342808055 | 9,248710343 | 9,477758266 | 9,813252106 | PCP037788 | XM_009371936 |
| PCP037789 | 9,791162889 | 9,968666793 | 10,0274499  | 9,957102042 | PCP037789 | XR_526917    |
| PCP038025 | 9,063395081 | 8,97441459  | 9,115485887 | 9,403715086 | PCP038025 | XM_009339705 |
| PCP038032 | 10,30910114 | 10,48213232 | 10,59960605 | 10,81057163 |           |              |
| PCP038045 | 10,11591499 | 10,33798978 | 10,33016621 | 10,36340108 | PCP038045 | XM_008368918 |
| PCP038051 | 9,539798574 | 9,475064611 | 9,658211483 | 9,918863237 | PCP038051 | XM_008363738 |
| PCP038118 | 9,021451966 | 8,951284715 | 9,187352073 | 9,479780264 | PCP038118 | XM_009359194 |
| PCP038129 | 8,862110391 | 8,978224236 | 8,980139578 | 9,358277568 | PCP038129 | XM_009375115 |
| PCP038156 | 9,97632067  | 10,0945132  | 10,19269967 | 10,4580682  |           |              |
| PCP038182 | 10,89860139 | 10,50878516 | 11,0114579  | 10,79658315 |           |              |
| PCP038298 | 9,708514896 | 9,616548844 | 9,71539578  | 10,02421162 | PCP038298 | XM_009345354 |
| PCP038363 | 10,46283965 | 10,5865302  | 10,65761321 | 10,9346713  | PCP038363 | XM_009356423 |
| PCP038409 | 9,619614757 | 9,580578921 | 9,702744108 | 10,1581931  | PCP038409 | XM_017330986 |
| PCP038418 | 9,300741498 | 8,783554874 | 8,827596761 | 8,87036472  |           |              |
| PCP038500 | 9,588714636 | 9,525520809 | 9,680658406 | 9,960001932 |           |              |
| PCP038520 | 9,710238196 | 9,619614757 | 9,820178962 | 10,04939934 | PCP038520 | XM_009362766 |
| PCP038628 | 9,144658243 | 9,099794885 | 9,210257347 | 9,791700135 |           |              |
| PCP038640 | 9,745959978 | 9,834992412 | 9,933690655 | 10,41433641 |           |              |
| PCP038676 | 9,874981348 | 9,944960906 | 9,960001932 | 9,880609006 |           |              |
| PCP038699 | 9,251079962 | 9,446400988 | 9,436711542 | 9,817511342 | PCP038699 | XM_009356466 |
| PCP038744 | 9,193106413 | 9,208648936 | 9,320416982 | 9,177419538 | PCP038744 | XM_009351304 |
| PCP038764 | 9,057991723 | 9,050746552 | 9,014941046 | 9,020507757 |           |              |
| PCP038800 | 9,830784548 | 10,00140819 | 9,87036472  | 10,10721708 | PCP038800 | XM_009372514 |
| PCP038873 | 8,903881846 | 8,943481842 | 9,08833774  | 9,409390936 | PCP038873 | XM_009341266 |
| PCP038959 | 8,805195705 | 8,787902559 | 9,008428622 | 9,315149562 |           |              |
| PCP038990 | 11,94580958 | 11,72778009 | 11,87344411 | 12,23461688 | PCP038990 | XM_008366971 |
| PCP039020 | 10,52454172 | 10,6329952  | 10,5685927  | 10,68562484 | PCP039020 | XM_009370457 |
| PCP039200 | 9,615942233 | 9,536577492 | 9,548821908 | 9,19640541  |           |              |
| PCP039280 | 8,72904287  | 8,532667615 | 9,05709822  | 9,414325838 |           |              |
| PCP039287 | 8,659389441 | 8,62935662  | 8,68183575  | 9,419264989 | PCP039287 | XM_009337460 |
| PCP039303 | 10,12713025 | 9,897845456 | 10,10721708 | 10,41468524 |           |              |
| PCP039314 | 9,144658243 | 8,890781061 | 9,092757141 | 10,06518722 | PCP039314 | XM_009369685 |
| PCP039510 | 11,08790699 | 11,30111318 | 11,3819052  | 11,30833903 |           |              |
| PCP039533 | 9,232013125 | 8,744833837 | 8,897845456 | 9,142107057 | PCP039533 | XM_009335833 |
| PCP039548 | 10,34059565 | 10,29462075 | 10,44224893 | 10,73216743 |           |              |
| PCP039555 | 8,953236133 | 9,011227255 | 9,160703421 | 9,017727086 | PCP039555 | XM_009361001 |
| PCP039570 | 9,214319121 | 9,388017285 | 9,320416982 | 9,40017499  |           |              |
| PCP039586 | 10,16532158 | 10,15355203 | 10,17617315 | 10,1412514  |           |              |
| PCP039592 | 9,042562264 | 9,159871337 | 9,325687724 | 9,744833837 | PCP039592 | XM_009357650 |

|           |             |             |             |             |           |              |
|-----------|-------------|-------------|-------------|-------------|-----------|--------------|
| PCP039596 | 9,302250498 | 9,125852541 | 9,419960178 | 10,07236042 | PCP039596 | XM_009367213 |
| PCP039600 | 9,074141463 | 8,895817605 | 9,07325791  | 9,024225474 | PCP039600 | XR_667600    |
| PCP039616 | 11,82588498 | 11,78135971 | 11,74090648 | 11,89228856 | PCP039616 | XM_008355364 |
| PCP039637 | 10,72252579 | 10,31552321 | 10,26209485 | 9,892800824 | PCP039637 | XM_009353371 |
| PCP039638 | 8,977279923 | 8,939579214 | 8,75043902  | 9,080364533 | PCP039638 | XM_009353370 |
| PCP039642 | 9,460803985 | 9,539798574 | 9,534633604 | 9,874474241 |           |              |
| PCP039652 | 9,500503319 | 9,592457037 | 9,559051993 | 9,939094317 |           |              |
| PCP039679 | 9,933203774 | 9,911391988 | 10,20985541 | 10,42030765 | PCP039679 | XM_009359475 |
| PCP039709 | 12,18466772 | 12,06260948 | 12,22480663 | 12,1378461  | PCP039709 | XM_009358786 |
| PCP039746 | 9,668884984 | 10,0588982  | 9,876516947 | 10,34170783 | PCP039746 | XM_009359512 |
| PCP039792 | 9,28771238  | 9,133578937 | 9,250298418 | 9,141264175 | PCP039792 | XM_009347182 |
| PCP039800 | 10,15101654 | 10,06653324 | 10,3505746  | 10,44467328 |           |              |
| PCP039809 | 8,335390355 | 8,309840108 | 8,470333494 | 10,91163916 | PCP039809 | XM_009341809 |
| PCP039810 | 9,259743264 | 8,882643049 | 9,048949988 | 8,865207434 | PCP039810 | XM_009341652 |
| PCP039836 | 8,82336724  | 8,794415866 | 9,193944186 | 9,782998209 | PCP039836 | XM_008345417 |
| PCP039837 | 8,416459769 | 8,60855054  | 9,103287808 | 9,738649634 | PCP039837 | XM_008345418 |
| PCP039847 | 9,573647187 | 9,385150582 | 9,385150582 | 9,468277836 | PCP039847 | XM_018645142 |
| PCP039938 | 10,32530546 | 10,68533575 | 10,74230944 | 11,16616308 | PCP039938 | XM_008356806 |
| PCP039961 | 9,231221181 | 8,471675214 | 8,904875427 | 8,84862294  |           |              |
| PCP039979 | 8,615923847 | 8,740354199 | 8,868297843 | 9,152284842 |           |              |
| PCP040026 | 9,394462695 | 8,794415866 | 8,70276142  | 10,58527242 |           |              |
| PCP040138 | 8,716545126 | 9,093628836 | 9,299963518 | 9,642647426 | PCP040138 | XM_009370695 |
| PCP040177 | 10,13057056 | 10,35901375 | 10,73131903 | 11,10874006 | PCP040177 | XM_009349061 |
| PCP040215 | 9,393755108 | 9,316666199 | 9,545601627 | 9,218369492 | PCP040215 | XR_525567    |
| PCP040242 | 11,2628759  | 11,1165584  | 11,15777008 | 11,1600794  | PCP040242 | XM_009371569 |
| PCP040249 | 9,87036472  | 10,01262454 | 10,12885787 | 10,44604941 | PCP040249 | XM_009351639 |
| PCP040265 | 9,971543554 | 9,769837844 | 10,00327897 | 10,23481743 | PCP040265 | XM_008345170 |
| PCP040329 | 10,00982862 | 9,485829309 | 9,22881869  | 9,402308618 | PCP040329 | XM_008379079 |
| PCP040396 | 10,18363538 | 10,31098761 | 10,2737956  | 10,61960559 |           |              |
| PCP040460 | 8,080391184 | 8,666508075 | 9,939094317 | 11,09077405 | PCP040460 | XM_009376263 |
| PCP040561 | 8,664162806 | 8,725638921 | 8,825499451 | 9,147204925 | PCP040561 | XM_009377717 |
| PCP040704 | 9,760437201 | 9,793326936 | 10,35424938 | 11,15587443 | PCP040704 | XM_008357523 |
| PCP040809 | 9,406566431 | 9,599299194 | 9,67124029  | 9,972979786 |           |              |
| PCP040818 | 11,17430154 | 10,77999014 | 10,84758201 | 11,21411873 | PCP040818 | XM_009344811 |
| PCP040830 | 9,945443836 | 10,08878824 | 10,25068924 | 10,15987134 | PCP040830 | XM_009377725 |
| PCP040863 | 10,3790209  | 10,46964182 | 10,49485558 | 10,82362996 | PCP040863 | XM_009366091 |
| PCP040965 | 8,84024291  | 8,839203788 | 8,784634846 | 9,340584522 |           |              |
| PCP041029 | 10,14974712 | 9,792790294 | 9,82707272  | 9,916879659 | PCP041029 | XM_009380213 |
| PCP041111 | 9,747639151 | 10,09496177 | 10,11026144 | 10,11981006 | PCP041111 | XM_018650406 |
| PCP041181 | 9,139551352 | 9,206208529 | 9,151447887 | 9,20701432  | PCP041181 | XM_009372321 |
| PCP041349 | 10,46352437 | 10,47404051 | 10,47337091 | 10,77588184 | PCP041349 | XM_009373989 |
| PCP041357 | 10,0588982  | 9,560963278 | 9,479113318 | 9,186535222 |           |              |
| PCP041385 | 9,345782228 | 9,637222599 | 9,533329732 | 9,650459419 | PCP041385 | XM_009370019 |
| PCP041401 | 9,643260955 | 9,897346324 | 9,863148641 | 9,799281622 | PCP041401 | XM_018649882 |
| PCP041443 | 16,05172577 | 15,86843676 | 15,89937274 | 16,0931493  |           |              |
| PCP041613 | 9,25502857  | 9,115485887 | 9,183213552 | 9,526831754 | PCP041613 | XM_008354832 |

|           |             |             |             |             |           |              |
|-----------|-------------|-------------|-------------|-------------|-----------|--------------|
| PCP041614 | 9,469641817 | 9,098032083 | 8,979196518 | 8,969616759 |           |              |
| PCP041629 | 9,417852515 | 8,84024291  | 9,053464362 | 8,888743249 | PCP041629 | XM_008228004 |
| PCP041645 | 10,05347794 | 10,28771238 | 10,87395927 | 11,67286728 | PCP041645 | XM_009335626 |
| PCP041866 | 10,33427329 | 10,37503943 | 10,40016431 | 10,40797937 | PCP041866 | XM_017326527 |
| PCP041883 | 8,924812504 | 8,976334992 | 9,048949988 | 9,37286506  |           |              |
| PCP041888 | 9,09011242  | 9,454648871 | 9,338357556 | 9,399448837 |           |              |
| PCP041932 | 9,564778269 | 9,683573652 | 9,681818185 | 10,12196082 |           |              |
| PCP041966 | 11,52552081 | 11,4446681  | 11,63541432 | 11,58762283 | PCP041966 | XM_008340338 |
| PCP041977 | 12,01216009 | 12,16741815 | 12,57380574 | 13,07903971 | PCP041977 | XM_009352908 |
| PCP042003 | 12,56502351 | 12,2850178  | 12,42539164 | 12,83368075 | PCP042003 | XM_018643930 |
| PCP042026 | 9,550746785 | 9,535275377 | 9,54173552  | 9,197216693 | PCP042026 | XM_018648246 |
| PCP042027 | 8,874458871 | 8,816983623 | 9,286950435 | 9,36047402  | PCP042027 | XM_009358423 |
| PCP042229 | 10,29039906 | 10,07725635 | 10,42975194 | 10,43010752 | PCP042229 | XM_009379749 |
| PCP042242 | 9,144658243 | 9,286164981 | 9,184057088 | 9,123267853 | PCP042242 | XM_009367765 |
| PCP042243 | 8,985841937 | 8,910882535 | 8,913876736 | 8,855896288 | PCP042243 | XM_009367751 |
| PCP042291 | 8,731319031 | 8,882643049 | 8,825499451 | 9,17990909  | PCP042291 | XM_008359765 |
| PCP042296 | 8,944477815 | 9,233619677 | 9,098032083 | 9,442943496 |           |              |
| PCP042298 | 9,982523054 | 9,985841937 | 10,07012094 | 10,62965715 | PCP042298 | XM_009363893 |
| PCP042327 | 8,889747307 | 8,856954575 | 9,136145235 | 9,385150582 | PCP042327 | XM_009380795 |
| PCP042450 | 9,86004717  | 9,856425529 | 9,784094961 | 9,749316372 | PCP042450 | XM_008393669 |
| PCP042476 | 9,119797095 | 8,788979283 | 9,006550496 | 8,850718177 | PCP042476 | XM_008388412 |
| PCP042484 | 9,435316054 | 9,618385502 | 9,622051819 | 9,593708574 | PCP042484 | XM_009348829 |
| PCP042525 | 9,447765141 | 9,654636029 | 9,659995892 | 10,42136007 |           |              |
| PCP042530 | 9,538518764 | 9,904890476 | 10,34983409 | 10,97775931 | PCP042530 | XM_009379544 |
| PCP042548 | 9,511100329 | 9,842350343 | 9,647458426 | 9,491853096 | PCP042548 | XM_009365768 |
| PCP042552 | 8,707359132 | 8,818038868 | 8,87036472  | 9,444331629 |           |              |
| PCP042562 | 9,495195473 | 9,129283017 | 9,2589664   | 9,449148645 |           |              |
| PCP042567 | 9,127555902 | 9,356826076 | 9,42485912  | 9,610415859 | PCP042567 | XM_008395285 |
| PCP042568 | 9,154818109 | 9,412209922 | 9,452591317 | 9,987732989 | PCP042568 | XM_008395282 |
| PCP042572 | 9,764324258 | 9,698704667 | 9,805211831 | 10,34392964 |           |              |
| PCP042645 | 10,31778568 | 10,68503783 | 9,837107523 | 10,37177664 | PCP042645 | XM_009367378 |
| PCP042800 | 10,13656824 | 9,854354156 | 10,0060876  | 9,910897522 | PCP042800 | XM_009358099 |
| PCP042834 | 9,466932951 | 9,368506462 | 9,509121785 | 9,394462695 | PCP042834 | XM_018645119 |
| PCP042854 | 10,13741386 | 10,14252831 | 10,19926745 | 10,51799411 | PCP042854 | XM_009362769 |
| PCP042889 | 10,50812159 | 10,51142653 | 10,56605404 | 11,20803312 |           |              |
| PCP042931 | 9,347997771 | 9,306813609 | 9,485165154 | 9,304533858 | PCP042931 | XM_008366146 |
| PCP042987 | 9,19802752  | 8,483815777 | 9,014941046 | 9,396604781 | PCP042987 | NM_001302391 |
| PCP043059 | 12,99429509 | 12,46735081 | 12,43679741 | 12,21644274 |           |              |
| PCP043070 | 9,719953466 | 9,999534994 | 9,839203788 | 9,591204414 | PCP043070 | XM_018651665 |
| PCP043133 | 8,977279923 | 8,788979283 | 8,950322598 | 9,441554026 | PCP043133 | XM_009374285 |
| PCP043134 | 10,47337091 | 10,44432127 | 10,58371275 | 10,91313625 |           |              |
| PCP043135 | 9,686500527 | 9,763212367 | 9,652844973 | 10,22077734 | PCP043135 | XM_009374263 |
| PCP043175 | 11,6731633  | 11,75697323 | 11,78012962 | 11,79306271 | PCP043175 | XM_009356145 |
| PCP043201 | 9,246336825 | 9,097163045 | 9,159871337 | 9,498510178 | PCP043201 | XM_009377056 |
| PCP043202 | 10,66977089 | 10,66059318 | 10,61900026 | 10,95564991 | PCP043202 | XM_009377057 |
| PCP043223 | 14,80408059 | 14,66742593 | 14,79475447 | 15,08881598 | PCP043223 | XM_008368217 |

|           |             |             |             |             |           |              |
|-----------|-------------|-------------|-------------|-------------|-----------|--------------|
| PCP043260 | 9,594324604 | 9,73809226  | 9,898858314 | 9,586220553 | PCP043260 | XM_009357823 |
| PCP043280 | 8,383704292 | 8,470333494 | 8,922822231 | 9,761002638 | PCP043280 | XM_009361776 |
| PCP043373 | 9,375756255 | 8,821231873 | 9,095397023 | 9,193106413 | PCP043373 | XM_009372878 |
| PCP043390 | 16,72577457 | 16,54815467 | 16,94022951 | 17,52497267 |           |              |
| PCP043425 | 9,618991087 | 9,665335917 | 9,751544059 | 10,0692215  |           |              |
| PCP043445 | 9,663558104 | 9,745959978 | 10,0060876  | 10,22480965 | PCP043445 | XM_008384010 |
| PCP043541 | 9,757673353 | 9,791700135 | 9,892800824 | 10,16406469 | PCP043541 | XM_008382397 |
| PCP043652 | 10,64806092 | 10,25227514 | 10,07056375 | 9,553955615 | PCP043652 | XM_009346285 |
| PCP043654 | 8,501160452 | 9,266013461 | 9,061587209 | 8,892785649 | PCP043654 | XM_009346271 |
| PCP043658 | 9,020507757 | 9,031577154 | 9,245552706 | 9,108524457 | PCP043658 | XM_009337484 |
| PCP043660 | 9,750991645 | 9,510427928 | 9,769292392 | 10,00327897 | PCP043660 | XM_009337506 |
| PCP043691 | 13,25684703 | 13,4767462  | 13,52918651 | 13,77882971 | PCP043691 | XM_008391582 |
| PCP043697 | 10,11070515 | 10,17990909 | 10,30492167 | 10,12153352 | PCP043697 | NM_001294083 |
| PCP043711 | 8,652235507 | 8,784634846 | 9,035266491 | 9,217545787 |           |              |
| PCP043712 | 9,409390936 | 9,312882955 | 9,285402219 | 9,120678526 | PCP043712 | XM_017328371 |
| PCP043715 | 10,87138935 | 10,87677016 | 11,15312765 | 11,23940162 | PCP043715 | NM_001293866 |
| PCP043717 | 10,1176431  | 10,34170783 | 10,34466208 | 10,86625119 |           |              |
| PCP043745 | 9,130132926 | 9,21916852  | 9,336127147 | 9,743706817 |           |              |
| PCP043746 | 9,473035989 | 9,524874682 | 9,552669098 | 10,03159094 |           |              |
| PCP043766 | 9,110274492 | 9,413627929 | 9,62935662  | 9,86004717  | PCP043766 | XM_009367569 |
| PCP043796 | 9,965308117 | 9,968191576 | 10,02421162 | 10,4307975  |           |              |
| PCP043858 | 9,676538932 | 9,670071972 | 9,894317583 | 9,435316054 | PCP043858 | XR_001953869 |
| PCP043863 | 10,34687935 | 10,58777752 | 10,4118605  | 10,66059318 | PCP043863 | XM_009341298 |
| PCP043938 | 9,819109312 | 9,613476402 | 9,838148156 | 10,06429817 | PCP043938 | XM_009350694 |
| PCP043940 | 10,23202512 | 10,07236042 | 10,04302728 | 10,18818083 |           |              |
| PCP043977 | 9,306061689 | 9,213517401 | 9,226412193 | 9,275356315 | PCP043977 | XM_009371509 |
| PCP044040 | 8,967716202 | 9,191478757 | 9,359024737 | 9,475733431 | PCP044040 | XM_009337659 |
| PCP044053 | 9,136145235 | 9,422064766 | 9,402308618 | 9,769292392 | PCP044053 | XM_009344592 |
| PCP044059 | 10,57080444 | 10,77834823 | 10,37829486 | 10,18115226 | PCP044059 | XM_009369127 |
| PCP044128 | 9,086587411 | 8,955155849 | 8,980139578 | 8,930737338 | PCP044128 | XM_009365240 |
| PCP044134 | 9,682994584 | 9,507140523 | 9,861086906 | 9,933690655 | PCP044134 | XM_009336078 |
| PCP044144 | 9,314401976 | 9,316666199 | 9,555873659 | 9,359024737 | PCP044144 | XM_008377866 |
| PCP044150 | 9,718241739 | 9,784094961 | 9,935651269 | 10,14168568 | PCP044150 | XM_009376686 |
| PCP044153 | 9,004698008 | 8,807354922 | 9,216745858 | 9,230428801 | PCP044153 | XM_009339456 |
| PCP044197 | 8,390899794 | 8,572397068 | 8,806291831 | 9,603014275 |           |              |
| PCP044249 | 9,21916852  | 9,231221181 | 9,347244868 | 9,664749481 | PCP044249 | XM_009368143 |
| PCP044270 | 10,7128107  | 10,86547811 | 10,98655315 | 11,1501725  | PCP044270 | XM_009343258 |
| PCP044271 | 9,211888295 | 9,306061689 | 9,553955615 | 9,779719355 | PCP044271 | XM_009343249 |
| PCP044272 | 8,271463028 | 8,795487741 | 9,066977144 | 9,344295908 |           |              |
| PCP044318 | 9,112882543 | 9,238404739 | 9,223205318 | 9,531381461 | PCP044318 | XM_017331072 |
| PCP044390 | 9,046223651 | 8,829722735 | 9,009352771 | 9,283852339 | PCP044390 | XM_009357891 |
| PCP044393 | 8,812722827 | 9,074141463 | 9,06520069  | 9,339850003 | PCP044393 | XM_008350437 |
| PCP044429 | 8,597419437 | 8,6794801   | 9,036173613 | 9,124974266 | PCP044429 | XM_008375136 |
| PCP044438 | 9,319672121 | 9,183213552 | 9,121533517 | 9,038013592 | PCP044438 | XM_009363252 |
| PCP044484 | 11,3459596  | 11,31722605 | 11,2736033  | 11,05279218 | PCP044484 | XM_009356972 |
| PCP044511 | 9,488502959 | 9,856939018 | 9,668884984 | 9,773139207 | PCP044511 | NM_001328944 |

|           |             |             |             |             |           |              |
|-----------|-------------|-------------|-------------|-------------|-----------|--------------|
| PCP044548 | 9,949826711 | 9,516350087 | 9,723370841 | 9,642051693 |           |              |
| PCP044563 | 10,37431138 | 10,24198315 | 10,38478375 | 10,37973575 | PCP044563 | XM_018647373 |
| PCP044576 | 10,01168851 | 10,20089861 | 10,14720492 | 10,0370939  | PCP044576 | XM_009340112 |
| PCP044586 | 9,642647426 | 9,650459419 | 9,731879027 | 10,06608919 | PCP044586 | XM_009370520 |
| PCP044601 | 9,269126679 | 9,584342459 | 9,810571635 | 9,664145025 | PCP044601 | XM_017333957 |
| PCP044613 | 8,855896288 | 8,838163917 | 8,78571401  | 9,19802752  |           |              |
| PCP044659 | 10,70822173 | 10,37177664 | 10,57049139 | 10,79873909 | PCP044659 | XM_009369176 |
| PCP044677 | 9,531381461 | 9,390878304 | 9,189824559 | 9,164906927 | PCP044677 | XM_009355609 |
| PCP044688 | 10,03754695 | 9,872936465 | 10,03021191 | 10,30226192 |           |              |
| PCP044698 | 10,08125706 | 10,16113188 | 10,3858624  | 10,63117706 | PCP044698 | XM_021948712 |
| PCP044811 | 10,80467153 | 10,92950254 | 11,3555328  | 12,51035127 |           |              |
| PCP044830 | 8,884689491 | 8,828676005 | 9,271463028 | 8,821231873 | PCP044830 | XM_018642976 |
| PCP044833 | 8,960957618 | 8,994353437 | 9,142949447 | 9,473035989 | PCP044833 | XM_018650045 |
| PCP044846 | 8,775873612 | 8,688844752 | 8,73809226  | 9,141264175 | PCP044846 | XM_009358311 |
| PCP044863 | 8,736976865 | 8,83709175  | 9,099794885 | 9,136991112 | PCP044863 | XM_018650254 |
| PCP044872 | 9,303780748 | 9,102421932 | 9,369968059 | 8,804131021 | PCP044872 | XM_009369078 |
| PCP045020 | 8,70158371  | 8,705044823 | 8,776992236 | 9,479113318 | PCP045020 | XM_018651990 |
| PCP045021 | 8,645045922 | 8,626913629 | 9,010304306 | 9,309089764 |           |              |
| PCP045028 | 13,6462583  | 13,36422633 | 13,64835758 | 14,21011349 | PCP045028 | XR_665791    |
| PCP045034 | 11,1825992  | 11,28270042 | 11,35792033 | 11,88937847 | PCP045034 | XM_009351735 |
| PCP045057 | 10,00046486 | 10,4065558  | 10,28424575 | 10,5552314  |           |              |
| PCP045101 | 9,769837844 | 9,87958325  | 9,845490051 | 10,18776033 | PCP045101 | XM_009344367 |
| PCP045115 | 9,300741498 | 9,277682605 | 9,251079962 | 9,083027168 |           |              |
| PCP045133 | 11,28828934 | 11,46267097 | 11,25286054 | 13,00883651 |           |              |

*Cluster 6*

| <b>Gene</b> | <b>H1</b>   | <b>H2</b>   | <b>H3</b>   | <b>H4</b>   |           |              |
|-------------|-------------|-------------|-------------|-------------|-----------|--------------|
| PCP000030   | 7,979167931 | 7,900866808 | 7,950293432 | 7,803033252 | PCP000030 | XM_017326326 |
| PCP000046   | 7,44567705  | 7,528805707 | 7,857980995 | 8,375039431 | PCP000046 | XM_008393849 |
| PCP000064   | 7,805227956 | 8,027905997 | 8,013071384 | 8,338379842 |           |              |
| PCP000071   | 7,244791942 | 7,266786541 | 7,235248379 | 7,90285744  | PCP000071 | XM_018647602 |
| PCP000101   | 6,594996337 | 6,759289016 | 6,890811455 | 7,3458044   | PCP000101 | XM_018651212 |
| PCP000103   | 7,339850003 | 7,231989133 | 7,785746699 | 8,178266468 | PCP000103 | XM_008375314 |
| PCP000110   | 7,315874125 | 7,520972191 | 7,572359168 | 7,946438456 |           |              |
| PCP000127   | 7,453929061 | 7,486473046 | 7,587440004 | 8,094500005 | PCP000127 | XM_017328477 |
| PCP000150   | 7,163196797 | 7,473056289 | 8,087462841 | 8,305286574 | PCP000150 | XM_009377998 |
| PCP000156   | 8,071462363 | 8,257387843 | 8,122413888 | 7,169925001 | PCP000156 | XM_009377994 |
| PCP000178   | 7,74819285  | 8,501160452 | 8,214319121 | 8,495855027 | PCP000178 | XM_009344591 |
| PCP000190   | 8,016808288 | 7,920829209 | 8,060695932 | 8,489165579 | PCP000190 | XM_009342109 |
| PCP000195   | 7,792269724 | 7,665335917 | 7,677155841 | 8,188193194 | PCP000195 | XM_009342065 |
| PCP000196   | 7,826548487 | 7,908872939 | 8,048050866 | 8,803065551 | PCP000196 | XM_008347526 |
| PCP000204   | 7,876516947 | 8,09976859  | 8,302273349 | 8,386595423 | PCP000204 | XM_009339725 |
| PCP000214   | 8,268331458 | 8,178266468 | 8,209453366 | 8,607330314 | PCP000214 | XM_009339702 |
| PCP000231   | 8,118941073 | 8,233619677 | 8,315919398 | 8,714245518 |           |              |
| PCP000244   | 8,194756854 | 8,283875484 | 8,740354199 | 8,835008208 | PCP000244 | XM_020565026 |
| PCP000254   | 7,080337882 | 7,241554209 | 7,327956767 | 7,83080039  |           |              |
| PCP000257   | 7,105070402 | 6,946379968 | 7,732472726 | 7,776959347 | PCP000257 | XM_017334679 |
| PCP000264   | 8,201290788 | 8,129283017 | 8,369248353 | 8,978224236 | PCP000264 | XR_525486    |
| PCP000269   | 8,449850215 | 8,209453366 | 8,448446735 | 8,199672345 | PCP000269 | XM_008380929 |
| PCP000279   | 7,254272787 | 7,614709844 | 7,584962501 | 8,026080745 |           |              |
| PCP000284   | 6,902917719 | 6,772545519 | 7,06608919  | 7,541716163 | PCP000284 | XM_021957035 |
| PCP000287   | 8,739206792 | 8,336863563 | 8,027905997 | 7,481153605 | PCP000287 | XM_008349789 |
| PCP000289   | 8,354602022 | 8,389437748 | 8,615923847 | 9,071462363 | PCP000289 | XM_008359501 |
| PCP000292   | 8,844454703 | 8,606109055 | 8,553322101 | 8,78571401  |           |              |
| PCP000294   | 7,348728154 | 7,486473046 | 7,380850638 | 7,327956767 | PCP000294 | XM_008359643 |
| PCP000316   | 6,914923239 | 6,882643049 | 7,186559982 | 7,549438149 |           |              |
| PCP000321   | 7,497213158 | 6,996275749 | 7,285402219 | 7,336908182 | PCP000321 | XM_009357369 |
| PCP000326   | 7,285402219 | 7,481153605 | 7,426264755 | 7,857980995 | PCP000326 | XM_009357376 |
| PCP000329   | 7,351645995 | 7,033423002 | 7,297649983 | 7,06608919  | PCP000329 | XM_009357379 |
| PCP000332   | 7           | 7,037052702 | 7,122362117 | 6,714245518 |           |              |
| PCP000350   | 7,920829209 | 8,115459877 | 7,904905525 | 7,101503009 | PCP000350 | XM_009371806 |
| PCP000358   | 7,400879436 | 7,569855608 | 7,646234675 | 7,969645536 |           |              |
| PCP000368   | 9,025139562 | 8,398016818 | 8,630558365 | 8,929761415 | PCP000368 | XM_009371778 |
| PCP000384   | 8,668884984 | 8,564797319 | 8,668884984 | 9,108524457 | PCP000384 | XM_008341852 |
| PCP000388   | 7,646234675 | 8,705044823 | 7,992485211 | 8,087462841 |           |              |
| PCP000389   | 8,306836389 | 8,089212109 | 8,212715235 | 8,668884984 |           |              |
| PCP000407   | 8,909893084 | 8,708497652 | 8,345760055 | 8,442943496 | PCP000407 | XM_008341816 |
| PCP000415   | 7,992485211 | 7,619633096 | 7,928784831 | 8,227230852 | PCP000415 | XM_008357306 |
| PCP000418   | 7,866228001 | 7,979167931 | 7,886733033 | 7,841281284 |           |              |
| PCP000439   | 6,222456826 | 7,101503009 | 8,233619677 | 12,15966009 | PCP000439 | XM_009352525 |



|           |             |             |             |             |           |              |
|-----------|-------------|-------------|-------------|-------------|-----------|--------------|
| PCP000467 | 7,986809101 | 7,882643049 | 7,998139076 | 8,5824431   | PCP000467 | XM_009351678 |
| PCP000482 | 7,805227956 | 7,426264755 | 7,624466495 | 7,569855608 | PCP000482 | XM_009353776 |
| PCP000489 | 8,810571635 | 8,744833837 | 8,478446064 | 7,389480771 |           |              |
| PCP000495 | 7,798763389 | 7,884658968 | 7,839203788 | 7,702726796 | PCP000495 | XM_008394823 |
| PCP000496 | 8,723387907 | 8,459431619 | 8,557157324 | 9,101529272 | PCP000496 | XM_008394826 |
| PCP000498 | 8,69115027  | 8,279239123 | 8,519636253 | 9,460107723 | PCP000498 | XM_017337494 |
| PCP000515 | 6,857980995 | 7,094552786 | 7,333870928 | 7,783522135 |           |              |
| PCP000519 | 6,87036472  | 7,263691734 | 7,462134139 | 7,965784285 | PCP000519 | XM_018647984 |
| PCP000529 | 7,77036657  | 7,969645536 | 7,948367232 | 8,519636253 | PCP000529 | XM_009360568 |
| PCP000538 | 6,714245518 | 7,058857621 | 7,395148508 | 7,562242424 | PCP000538 | XM_018648522 |
| PCP000539 | 8,127581695 | 7,874489611 | 8,136119594 | 8,448446735 | PCP000539 | XM_009340603 |
| PCP000540 | 8,153146652 | 8,214319121 | 8,265239967 | 8,618385502 | PCP000540 | XM_009340602 |
| PCP000543 | 7,118941073 | 7,279192684 | 7,251056285 | 7,864186145 | PCP000543 | XM_017323092 |
| PCP000548 | 7,193081765 | 7,539158811 | 7,890750668 | 8,694636474 | PCP000548 | XM_008345752 |
| PCP000551 | 7,894817763 | 7,73470962  | 8,159871337 | 8,487840034 | PCP000551 | XM_009373184 |
| PCP000555 | 7,579919292 | 7,781359714 | 7,892816    | 8,519636253 | PCP000555 | XM_009357147 |
| PCP000564 | 7,597456684 | 7,639015048 | 7,536596918 | 6,763809907 | PCP000564 | XM_009373147 |
| PCP000584 | 7,115511897 | 7,448488033 | 7,743689989 | 8,350187812 | PCP000584 | XR_001792081 |
| PCP000591 | 7,805227956 | 7,366322214 | 7,303780748 | 6,754887502 | PCP000591 | XM_009371386 |
| PCP000597 | 8,389437748 | 8,515699838 | 8,276124405 | 7,602364826 | PCP000597 | XM_009371376 |
| PCP000598 | 7,549438149 | 6,910852562 | 7,244791942 | 6,677085351 | PCP000598 | XM_018652222 |
| PCP000604 | 6,794415866 | 6,454011343 | 6,80309785  | 7,395148508 | PCP000604 | XM_008356158 |
| PCP000632 | 7,619633096 | 7,636624621 | 8,44431092  | 9,06608919  | PCP000632 | XM_009374219 |
| PCP000633 | 7,437377568 | 7,705079392 | 7,752681699 | 8,33391564  | PCP000633 | XM_008379677 |
| PCP000637 | 7,202907418 | 6,926829678 | 6,878602742 | 6,934634441 |           |              |
| PCP000640 | 8,013071384 | 7,807354922 | 8,252665432 | 8,309840108 |           |              |
| PCP000647 | 8,220765252 | 8,089212109 | 7,996219247 | 8,113742166 | PCP000647 | XM_009375710 |
| PCP000651 | 7,118941073 | 6,785681319 | 7,139551352 | 8,044394119 | PCP000651 | XM_009375714 |
| PCP000660 | 6,81159947  | 6,68187088  | 6,95419631  | 7,42063398  | PCP000660 | XM_009345488 |
| PCP000665 | 8,881634033 | 8,859006685 | 8,818038868 | 8,445718428 | PCP000665 | XM_018644616 |
| PCP000677 | 7,22881869  | 6,950351762 | 7,285402219 | 7,634230226 | PCP000677 | XM_009359650 |
| PCP000682 | 7,636624621 | 7,868328714 | 7,843418611 | 7,626950122 |           |              |
| PCP000698 | 7,136170875 | 6,958030641 | 7,235248379 | 7,908872939 | PCP000698 | XM_009381235 |
| PCP000700 | 7,22881869  | 7,617136829 | 7,841281284 | 7,6794801   | PCP000700 | XM_009381297 |
| PCP000704 | 8,517000043 | 8,388017285 | 8,498530123 | 8,385129006 | PCP000704 | XM_009381379 |
| PCP000741 | 8,198052084 | 8,426264755 | 8,82336724  | 9,543669869 | PCP000741 | XM_009340781 |
| PCP000751 | 8,274587815 | 8,533991546 | 8,398016818 | 8,243173983 |           |              |
| PCP000772 | 8,153146652 | 8,405141463 | 8,320439548 | 8,739206792 | PCP000772 | XM_008369953 |
| PCP000782 | 7,040782866 | 6,99242856  | 7,312882955 | 7,700439718 | PCP000782 | XM_008380631 |
| PCP000785 | 7,536596918 | 6,984931073 | 7,366322214 | 6,727920455 | PCP000785 | XM_009373565 |
| PCP000789 | 7,142923928 | 7,619633096 | 7,592457037 | 7,714245518 | PCP000789 | XM_009373644 |
| PCP000797 | 8,481113232 | 8,630558365 | 8,523561956 | 8,568602197 | PCP000797 | XM_009373754 |
| PCP000803 | 8,163247124 | 8,016808288 | 8,103287808 | 7,960001932 | PCP000803 | XM_009340573 |
| PCP000807 | 7,17990909  | 7,333870928 | 6,969587981 | 7,785746699 | PCP000807 | XM_009340567 |
| PCP000809 | 8,249492747 | 8,416459769 | 8,758223215 | 9,267559206 | PCP000809 | XM_018643480 |
| PCP000811 | 8,257387843 | 8,274587815 | 8,254225537 | 8,640244936 |           |              |

|           |             |             |             |             |           |              |
|-----------|-------------|-------------|-------------|-------------|-----------|--------------|
| PCP000845 | 7,963878669 | 8,517000043 | 8,087462841 | 8,276124405 | PCP000845 | XM_009359336 |
| PCP000854 | 8,037107627 | 8,314379315 | 8,385129006 | 8,124121312 |           |              |
| PCP000863 | 7,459431619 | 7,572359168 | 7,324900589 | 7,294620749 | PCP000863 | XM_018650240 |
| PCP000872 | 7,940577883 | 8,473015688 | 8,3994702   | 8,28692734  |           |              |
| PCP000895 | 7,994353437 | 8,091012169 | 8,22881869  | 8,745943176 | PCP000895 | XM_009377235 |
| PCP000918 | 8,183238369 | 8,158205728 | 8,335390355 | 8,641437649 | PCP000918 | XM_008360140 |
| PCP000925 | 7,139551352 | 7,105070402 | 7,115511897 | 7,896816753 | PCP000925 | XM_009371897 |
| PCP000939 | 8,440163216 | 8,473015688 | 8,568602197 | 9,117201525 |           |              |
| PCP000970 | 7,752681699 | 8,434628228 | 7,730164413 | 7,602364826 |           |              |
| PCP000971 | 6,965784285 | 6,910852562 | 7,282347131 | 7,626950122 | PCP000971 | XM_017332751 |
| PCP000988 | 7,254272787 | 7,44567705  | 7,672425342 | 8,113742166 |           |              |
| PCP000993 | 8,315919398 | 8,462175047 | 8,752648252 | 8,168270966 |           |              |
| PCP001005 | 7,377904593 | 7,266786541 | 7,351645995 | 7,934693407 | PCP001005 | XM_009370752 |
| PCP001017 | 7,276124405 | 7,426264755 | 7,491853096 | 8,276124405 | PCP001017 | XM_009364950 |
| PCP001020 | 9,06520069  | 8,611024797 | 8,828676005 | 8,477070141 | PCP001020 | XM_008366707 |
| PCP001021 | 7,711976642 | 7,486473046 | 7,813781191 | 7,360452072 |           |              |
| PCP001026 | 8,696967526 | 8,482485305 | 8,795487741 | 9,166589927 | PCP001026 | XM_008366705 |
| PCP001045 | 8,459431619 | 8,553322101 | 8,63542792  | 9,028817757 | PCP001045 | XM_009345440 |
| PCP001058 | 8,058911723 | 8,011227255 | 8,198052084 | 8,628153873 | PCP001058 | XM_018652144 |
| PCP001059 | 8,780277286 | 8,658211483 | 8,515699838 | 8,348728154 | PCP001059 | XR_665215    |
| PCP001067 | 8,17990909  | 8,235200503 | 8,3994702   | 8,647458426 | PCP001067 | XM_008373115 |
| PCP001072 | 8,45532722  | 8,495855027 | 8,70276142  | 8,578674597 |           |              |
| PCP001089 | 7,562242424 | 7,351645995 | 7,688809791 | 8,026080745 |           |              |
| PCP001093 | 8,336863563 | 8,440163216 | 8,458078458 | 8,291539098 |           |              |
| PCP001108 | 8,288496992 | 8,798730993 | 8,122413888 | 7,475733431 | PCP001108 | XM_018644263 |
| PCP001120 | 7,818070833 | 8,225593068 | 7,824449651 | 8,129283017 | PCP001120 | XM_009381039 |
| PCP001127 | 8,06786455  | 7,677155841 | 7,994353437 | 7,884658968 |           |              |
| PCP001137 | 8,191454081 | 8,360495967 | 8,522267655 | 8,895817605 |           |              |
| PCP001142 | 7,807354922 | 7,700439718 | 7,792269724 | 8,388017285 | PCP001142 | XM_009343345 |
| PCP001146 | 7,960001932 | 8,042589623 | 7,857980995 | 7,92677039  |           |              |
| PCP001148 | 8,460783512 | 8,614709844 | 8,501160452 | 8,449850215 |           |              |
| PCP001160 | 7,92677039  | 7,930737338 | 7,967687386 | 8,37794796  |           |              |
| PCP001188 | 7,309885571 | 6,926829678 | 7,254272787 | 7,06608919  | PCP001188 | XM_009375255 |
| PCP001193 | 8,293103743 | 8,471675214 | 8,933690655 | 9,356826076 |           |              |
| PCP001196 | 7,473056289 | 7,515699838 | 7,470292816 | 7,363433935 | PCP001196 | XM_009362023 |
| PCP001213 | 6,648609245 | 6,832890014 | 6,837060204 | 7,315874125 | PCP001213 | XM_009344146 |
| PCP001215 | 7,531381461 | 7,624466495 | 7,639015048 | 7,459431619 |           |              |
| PCP001218 | 7,855927425 | 7,582480735 | 7,665335917 | 7,626950122 | PCP001218 | XM_018649367 |
| PCP001219 | 8,453970202 | 8,049848549 | 7,845490051 | 7,377904593 |           |              |
| PCP001228 | 7,06608919  | 7,273049587 | 7,318949464 | 6,741466986 |           |              |
| PCP001240 | 7,936637939 | 7,321928095 | 7,693486957 | 7,876516947 | PCP001240 | XM_021966688 |
| PCP001248 | 6,62935662  | 6,772545519 | 6,798698597 | 7,483815777 |           |              |
| PCP001256 | 7,572359168 | 7,377904593 | 7,523561956 | 8,042589623 | PCP001256 | XM_009378663 |
| PCP001266 | 8,048050866 | 8,04072808  | 8,449850215 | 8,73470962  | PCP001266 | XM_009361340 |
| PCP001268 | 8,909893084 | 8,520932916 | 8,922822231 | 8,735826768 |           |              |
| PCP001319 | 7,792269724 | 7,890750668 | 8,268331458 | 8,661778098 | PCP001319 | XM_009377024 |

|           |             |             |             |             |           |              |
|-----------|-------------|-------------|-------------|-------------|-----------|--------------|
| PCP001320 | 6,442943496 | 6,942514505 | 7,156538193 | 7,497213158 |           |              |
| PCP001323 | 8,092757141 | 8,639051236 | 9,057991723 | 8,569855608 | PCP001323 | XM_009366598 |
| PCP001337 | 6,857980995 | 7,42063398  | 7,400879436 | 7,342785837 | PCP001337 | XM_009358339 |
| PCP001348 | 7,037052702 | 7,473056289 | 7,417852515 | 7,440204752 | PCP001348 | XM_009370066 |
| PCP001357 | 8,503825738 | 8,612241904 | 8,578674597 | 8,540438054 | PCP001357 | XM_009350515 |
| PCP001367 | 8,28077077  | 8,781359714 | 8,462175047 | 9,046223651 | PCP001367 | XM_008352450 |
| PCP001373 | 7,536596918 | 7,73470962  | 7,592457037 | 7,375039431 | PCP001373 | XM_009379621 |
| PCP001390 | 7,429030064 | 7,828644274 | 8,026080745 | 7,462134139 | PCP001390 | XM_008390002 |
| PCP001402 | 8,082149041 | 8,268331458 | 8,33391564  | 8,727920455 | PCP001402 | XM_009357906 |
| PCP001422 | 8,212715235 | 8,201290788 | 8,194756854 | 7,826548487 | PCP001422 | XM_018652316 |
| PCP001442 | 7,975389442 | 8,038918989 | 8,357552005 | 8,63542792  | PCP001442 | XM_009375054 |
| PCP001466 | 7,406587689 | 7,549438149 | 7,725673    | 8,174925683 |           |              |
| PCP001487 | 7,426264755 | 7,74819285  | 7,597456684 | 6,794415866 |           |              |
| PCP001492 | 6,62935662  | 6,794415866 | 7,06608919  | 7,50247382  | PCP001492 | XM_009346860 |
| PCP001499 | 8,148069774 | 8,069691427 | 8,148069774 | 8,876516947 | PCP001499 | XM_018648989 |
| PCP001500 | 6,95419631  | 7,06608919  | 6,914923239 | 6,64385619  |           |              |
| PCP001516 | 7,315874125 | 7,142923928 | 7,291585141 | 7,040782866 | PCP001516 | XM_018652464 |
| PCP001527 | 6,86628983  | 6,837060204 | 6,965784285 | 7,510408147 | PCP001527 | XM_008342000 |
| PCP001575 | 8,283875484 | 7,892816    | 7,924812504 | 7,523561956 | PCP001575 | XM_008365889 |
| PCP001692 | 6,420718183 | 7,21916852  | 7,294620749 | 7,263691734 | PCP001692 | XM_009350813 |
| PCP001697 | 6,667750232 | 6,890811455 | 7,189824559 | 7,609769734 | PCP001697 | XM_009350802 |
| PCP001699 | 7,279192684 | 7,330916878 | 7,536596918 | 7,920829209 |           |              |
| PCP001702 | 8,395191361 | 8,106798463 | 8,423452115 | 8,944477815 | PCP001702 | XM_018649377 |
| PCP001714 | 8,235200503 | 8,057071136 | 7,98111057  | 8,091012169 | PCP001714 | XM_008362383 |
| PCP001724 | 8,148069774 | 8,110248388 | 8,174925683 | 8,031604721 | PCP001724 | XM_009350361 |
| PCP001725 | 8,260543232 | 8,379378367 | 8,531381461 | 9,230428801 |           |              |
| PCP001726 | 7,815895594 | 8,247927513 | 7,969645536 | 7,928784831 | PCP001726 | XM_009350340 |
| PCP001732 | 8,029728942 | 8,22881869  | 8,541754876 | 8,825499451 |           |              |
| PCP001748 | 7,641473777 | 7,868328714 | 7,922851957 | 7,71651083  |           |              |
| PCP001766 | 7,754887502 | 7,700439718 | 8,42488011  | 8,198052084 | PCP001766 | XM_009358223 |
| PCP001793 | 6,81159947  | 7,037052702 | 7,324900589 | 7,442943496 |           |              |
| PCP001799 | 6,015024705 | 6,677085351 | 7,389480771 | 7,330916878 | PCP001799 | XM_018647481 |
| PCP001807 | 8,363390129 | 7,977279923 | 7,50779464  | 7,209453366 | PCP001807 | XR_001953207 |
| PCP001817 | 7,212666605 | 7,50779464  | 7,807354922 | 8,21757002  |           |              |
| PCP001820 | 8,235200503 | 8,622051819 | 8,279239123 | 8,09976859  | PCP001820 | XM_009358005 |
| PCP001821 | 7,54689446  | 7,464913269 | 8,024197765 | 8,194756854 | PCP001821 | XM_009357995 |
| PCP001826 | 8,204571144 | 8,224001674 | 8,174925683 | 8,118941073 |           |              |
| PCP001835 | 8,804131021 | 8,664162806 | 8,718806834 | 8,739206792 | PCP001835 | XM_009357816 |
| PCP001846 | 7,14974712  | 7,965784285 | 7,541716163 | 7,481153605 | PCP001846 | XM_008341503 |
| PCP001847 | 7,159871337 | 7,186559982 | 7,111970261 | 8,146339557 | PCP001847 | XM_009357611 |
| PCP001858 | 8,758223215 | 8,664162806 | 8,646270682 | 8,523561956 | PCP001858 | XM_009345356 |
| PCP001888 | 7,785746699 | 8,094500005 | 7,986809101 | 8,347267018 |           |              |
| PCP001922 | 8,075051225 | 7,92677039  | 8,018645301 | 7,518299077 | PCP001922 | XM_018647018 |
| PCP001952 | 7,617136829 | 7,189824559 | 7,92677039  | 7,400879436 | PCP001952 | XM_009374554 |
| PCP001953 | 7,273049587 | 7,003714662 | 7,108524457 | 7,634230226 | PCP001953 | XM_009374555 |
| PCP001954 | 8,491853096 | 8,269921462 | 8,254225537 | 8,436003553 | PCP001954 | XM_009374556 |

|           |             |             |             |             |           |              |
|-----------|-------------|-------------|-------------|-------------|-----------|--------------|
| PCP001977 | 8,136119594 | 7,536596918 | 7,622051819 | 7,196430001 | PCP001977 | XM_008376445 |
| PCP001980 | 7,483815777 | 7,872397856 | 7,912889336 | 8,21106088  |           |              |
| PCP001986 | 8,058911723 | 8,560982378 | 8,713111526 | 9,059804103 | PCP001986 | XM_009348148 |
| PCP001995 | 6,691115365 | 7,403693786 | 7,431873638 | 7,839203788 | PCP001995 | XM_009348276 |
| PCP001997 | 7,934693407 | 8,222408523 | 8,279239123 | 8,95805965  | PCP001997 | XM_008376466 |
| PCP002002 | 7,725673    | 7,662988741 | 7,884658968 | 7,094552786 | PCP002002 | XM_009348366 |
| PCP002025 | 8,403736386 | 8,32791187  | 8,430452552 | 8,279239123 | PCP002025 | XM_009360661 |
| PCP002033 | 7,990557838 | 8,21106088  | 8,154818109 | 8,622051819 |           |              |
| PCP002038 | 8,393733366 | 8,664162806 | 8,536558066 | 9,604238155 | PCP002038 | XR_001953384 |
| PCP002064 | 6,513016928 | 6,882643049 | 6,984931073 | 7,634230226 | PCP002064 | XM_008365537 |
| PCP002069 | 8,583722152 | 8,473015688 | 8,58747751  | 9,136991112 |           |              |
| PCP002075 | 7,30679083  | 7,589988142 | 8,009380767 | 8,309840108 |           |              |
| PCP002083 | 8,572397068 | 8,402287298 | 8,453970202 | 8,453970202 | PCP002083 | XM_017332622 |
| PCP002086 | 8,493174961 | 8,364878797 | 8,588714636 | 8,965784285 |           |              |
| PCP002087 | 6,961970533 | 7,176621973 | 7,539158811 | 8,120652609 | PCP002087 | XM_009380128 |
| PCP002091 | 7,723353774 | 7,587440004 | 7,896816753 | 8,413627929 | PCP002091 | XM_009364159 |
| PCP002105 | 8,64385619  | 8,567309664 | 8,639051236 | 9,049848549 | PCP002105 | XM_009364191 |
| PCP002106 | 7,579919292 | 7,960001932 | 8,290018847 | 8,64385619  | PCP002106 | XM_009364206 |
| PCP002107 | 8,43325159  | 8,782441329 | 8,80196697  | 9,152284842 | PCP002107 | XM_009364205 |
| PCP002115 | 8,176572111 | 8,139551352 | 8,130982335 | 8,577428828 | PCP002115 | XM_009380346 |
| PCP002125 | 7,377904593 | 6,97349648  | 7,321928095 | 6,906890596 | PCP002125 | XM_009373581 |
| PCP002129 | 8,517000043 | 8,518338423 | 8,770399609 | 9,211888295 |           |              |
| PCP002133 | 7,528805707 | 7,574934058 | 7,50517639  | 6,922792504 | PCP002133 | XM_009371408 |
| PCP002151 | 8,357552005 | 8,277659361 | 8,426264755 | 8,888743249 | PCP002151 | XM_009347503 |
| PCP002163 | 7,622051819 | 7,723353774 | 7,672425342 | 7,426264755 |           |              |
| PCP002165 | 7,105070402 | 7,014913158 | 6,874428132 | 6,768184325 | PCP002165 | XM_008393013 |
| PCP002167 | 7,231989133 | 7,714245518 | 7,884658968 | 8,478446064 | PCP002167 | XM_009363083 |
| PCP002197 | 7,303780748 | 7,073284692 | 7,254272787 | 7,076815597 | PCP002197 | XM_009338137 |
| PCP002199 | 8,194756854 | 8,344295908 | 8,519636253 | 9,194756854 | PCP002199 | XM_009378432 |
| PCP002212 | 7,803033252 | 7,839203788 | 7,772611496 | 7,453929061 | PCP002212 | XM_009341065 |
| PCP002217 | 8,589950702 | 8,376472723 | 8,28077077  | 8,560982378 | PCP002217 | XM_009341054 |
| PCP002258 | 7,440204752 | 7,727920455 | 7,761551232 | 8,188193194 | PCP002258 | XM_008386446 |
| PCP002259 | 8,868297843 | 8,874458871 | 8,062477937 | 8,829722735 | PCP002259 | XM_009376105 |
| PCP002263 | 7,910912508 | 7,46760555  | 7,579919292 | 7,098032083 | PCP002263 | XM_009376090 |
| PCP002271 | 7,934693407 | 8,400879436 | 8,3994702   | 8,560982378 |           |              |
| PCP002273 | 6,898812977 | 6,691115365 | 6,981053471 | 7,688809791 | PCP002273 | XM_009353092 |
| PCP002283 | 7,794415866 | 7,936637939 | 7,992485211 | 7,807354922 | PCP002283 | XM_018646366 |
| PCP002304 | 6,763809907 | 6,857980995 | 7,098032083 | 7,510408147 | PCP002304 | XM_009356437 |
| PCP002318 | 7,321928095 | 7,641473777 | 7,779194046 | 8,024197765 |           |              |
| PCP002339 | 7,698149009 | 7,732472726 | 7,92677039  | 7,684187561 | PCP002339 | XM_009366527 |
| PCP002341 | 8,069691427 | 8,303780748 | 8,305286574 | 9,907386437 |           |              |
| PCP002344 | 7,582480735 | 7,765998774 | 7,882643049 | 8,129283017 | PCP002344 | XM_009366533 |
| PCP002353 | 7,826548487 | 7,779194046 | 8,035238993 | 8,956143797 | PCP002353 | XM_008392634 |
| PCP002376 | 8,782441329 | 8,581200582 | 8,74929961  | 8,609806663 |           |              |
| PCP002383 | 7,146390476 | 7,395148508 | 7,282347131 | 7,807354922 | PCP002383 | XM_009368859 |
| PCP002384 | 8,396604781 | 8,058911723 | 8,106798463 | 7,557119022 | PCP002384 | XM_008359999 |

|           |             |             |             |             |           |              |
|-----------|-------------|-------------|-------------|-------------|-----------|--------------|
| PCP002391 | 6,950351762 | 6,754887502 | 6,737010678 | 7,845490051 | PCP002391 | XM_009338448 |
| PCP002398 | 7,285402219 | 7,212666605 | 7,481153605 | 7,783522135 | PCP002398 | XM_008382533 |
| PCP002400 | 8,752648252 | 8,860062694 | 8,956143797 | 8,657032562 |           |              |
| PCP002418 | 8,776992236 | 8,80196697  | 8,78571401  | 8,794415866 | PCP002418 | XM_009361497 |
| PCP002432 | 9,204571144 | 8,730198386 | 7,872397856 | 5,727920455 | PCP002432 | XM_009375270 |
| PCP002439 | 8,181549844 | 8,026080745 | 7,599912842 | 6,745909573 | PCP002439 | XM_009375280 |
| PCP002441 | 7,389480771 | 7,279192684 | 7,047996356 | 6,183288001 | PCP002441 | XM_009375284 |
| PCP002446 | 7,718841075 | 8,429071922 | 8,335390355 | 8,833933692 | PCP002446 | XM_009359671 |
| PCP002448 | 6,454011343 | 6,594996337 | 7,377904593 | 7,932687205 | PCP002448 | XM_021946109 |
| PCP002455 | 7,022367813 | 8,042589623 | 8,477070141 | 9,515699838 | PCP002455 | XM_009350325 |
| PCP002475 | 8,426264755 | 8,631795481 | 8,675957033 | 8,971543554 | PCP002475 | XM_008393403 |
| PCP002494 | 7,938579853 | 7,888743249 | 8,029728942 | 8,62450305  | PCP002494 | XM_009363143 |
| PCP002495 | 8,891783703 | 8,564797319 | 8,463524373 | 8,84862294  | PCP002495 | XM_009363140 |
| PCP002517 | 8,215921225 | 7,813781191 | 8,04072808  | 7,832890014 | PCP002517 | XM_008373634 |
| PCP002534 | 7,990557838 | 7,918863237 | 8,21106088  | 8,80196697  | PCP002534 | XM_009354782 |
| PCP002551 | 7,129283017 | 6,996275749 | 7,574934058 | 7,300764373 | PCP002551 | XM_017330684 |
| PCP002552 | 8,942514505 | 8,048050866 | 7,562242424 | 7,646234675 | PCP002552 | XM_009378264 |
| PCP002562 | 8,722226922 | 8,742578916 | 8,795487741 | 8,68183575  | PCP002562 | XM_008356674 |
| PCP002569 | 8,076815597 | 8,108524457 | 8,549476655 | 8,631795481 | PCP002569 | XM_009339879 |
| PCP002573 | 7,423494135 | 7,562242424 | 7,783522135 | 7,448488033 |           |              |
| PCP002603 | 7,667679281 | 7,448488033 | 7,431873638 | 6,750472519 | PCP002603 | XM_008369615 |
| PCP002625 | 7,888743249 | 8,09976859  | 8,122413888 | 8,481113232 | PCP002625 | XM_009356526 |
| PCP002646 | 6,584962501 | 6,785681319 | 6,890811455 | 7,523561956 | PCP002646 | XM_008385605 |
| PCP002656 | 8,173277373 | 8,353146825 | 8,483815777 | 8,743723645 | PCP002656 | XM_009360715 |
| PCP002657 | 7,132679654 | 7,318949464 | 7,153095972 | 7,862141394 | PCP002657 | XM_009360714 |
| PCP002680 | 7,251056285 | 7,617136829 | 8,060695932 | 8,960001932 |           |              |
| PCP002697 | 6,700439718 | 6,768184325 | 6,938638658 | 7,431873638 | PCP002697 | XM_009342221 |
| PCP002700 | 8,920858975 | 8,828676005 | 8,695819867 | 8,348728154 | PCP002700 | XM_008359312 |
| PCP002701 | 7,928784831 | 7,963878669 | 8,312882955 | 8,412231097 |           |              |
| PCP002706 | 7,636624621 | 7,494495616 | 7,400879436 | 7,360452072 | PCP002706 | XM_008366547 |
| PCP002707 | 8,558420713 | 8,263644792 | 8,373604714 | 8,24474438  | PCP002707 | XM_008366547 |
| PCP002708 | 7,942514505 | 7,759355602 | 7,798763389 | 7,785746699 | PCP002708 | XM_008358626 |
| PCP002716 | 8,321928095 | 8,294620749 | 8,312882955 | 8,736976865 |           |              |
| PCP002718 | 8,103287808 | 7,967687386 | 8,144658243 | 8,571107931 | PCP002718 | XM_009358404 |
| PCP002731 | 8,466260038 | 8,583722152 | 8,609806663 | 9,054387253 |           |              |
| PCP002751 | 8,112022407 | 7,658211483 | 7,785746699 | 7,225641265 | PCP002751 | XM_008382486 |
| PCP002759 | 7,3458044   | 7,688809791 | 7,587440004 | 7,386552314 |           |              |
| PCP002761 | 7,199672345 | 7,312882955 | 7,403693786 | 7,866228001 |           |              |
| PCP002800 | 8,057071136 | 7,437377568 | 7,429030064 | 7,222360218 | PCP002800 | XM_009353048 |
| PCP002812 | 7,395148508 | 6,837060204 | 7,539158811 | 8,481113232 | PCP002812 | XM_018646973 |
| PCP002813 | 8,174925683 | 8,214319121 | 8,625708843 | 8,744833837 | PCP002813 | XM_009355813 |
| PCP002870 | 7,845490051 | 7,403693786 | 7,366322214 | 7,462134139 |           |              |
| PCP002872 | 8,757123282 | 8,860062694 | 8,89684702  | 8,770399609 | PCP002872 | XM_009367619 |
| PCP002876 | 8,420676082 | 8,288496992 | 8,330916878 | 8,779161208 | PCP002876 | XM_009372023 |
| PCP002879 | 7,730164413 | 8,009380767 | 8,038918989 | 8,518338423 |           |              |
| PCP002896 | 8,675957033 | 8,501160452 | 8,670054263 | 8,306836389 |           |              |

|           |             |             |             |             |           |              |
|-----------|-------------|-------------|-------------|-------------|-----------|--------------|
| PCP002903 | 7,453929061 | 7,672425342 | 7,783522135 | 8,164906927 |           |              |
| PCP002911 | 6,579994693 | 6,938638658 | 7,415065677 | 7,456724026 | PCP002911 | XM_008394335 |
| PCP002920 | 8,555854491 | 8,672425342 | 8,667714757 | 8,586201784 | PCP002920 | XM_009377751 |
| PCP002949 | 8,252665432 | 8,092757141 | 8,314379315 | 7,984874125 | PCP002949 | XM_009360955 |
| PCP002960 | 7,790055203 | 8,225593068 | 8           | 7,544346278 | PCP002960 | XM_009340877 |
| PCP002987 | 7,807354922 | 7,695785075 | 7,826548487 | 7,30679083  | PCP002987 | XM_009348671 |
| PCP003036 | 7,139551352 | 7,251056285 | 7,238404739 | 6,894817763 | PCP003036 | XM_018643502 |
| PCP003059 | 7,321928095 | 7,142923928 | 7,330916878 | 7,910912508 | PCP003059 | XM_008377890 |
| PCP003076 | 7,510408147 | 7,641473777 | 7,882643049 | 8,038918989 |           |              |
| PCP003083 | 8,21916852  | 8,17990909  | 7,90285744  | 8,118941073 | PCP003083 | XM_009342581 |
| PCP003098 | 8,666508075 | 8,536558066 | 8,564797319 | 8,925791779 | PCP003098 | XM_008395081 |
| PCP003108 | 7,960001932 | 8,091012169 | 8,166564822 | 7,686500527 |           |              |
| PCP003130 | 7,111970261 | 7,241554209 | 7,686500527 | 8,14974712  | PCP003130 | XM_009340054 |
| PCP003146 | 8,247927513 | 8,41079052  | 8,37794796  | 9,06608919  | PCP003146 | XM_008387090 |
| PCP003164 | 7,06608919  | 6,619559738 | 6,969587981 | 7,609769734 | PCP003164 | XM_008353311 |
| PCP003171 | 6,732404887 | 6,639087423 | 7,163196797 | 7,369204723 | PCP003171 | XM_009349107 |
| PCP003215 | 6,95419631  | 6,965784285 | 6,988684687 | 7,531381461 | PCP003215 | XM_009353599 |
| PCP003272 | 7,115511897 | 7,163196797 | 7,651051691 | 7,269874722 | PCP003272 | XM_018648325 |
| PCP003285 | 8           | 7,914863459 | 7,589988142 | 7,670089681 | PCP003285 | XM_009374603 |
| PCP003286 | 8,33391564  | 7,251056285 | 7,273049587 | 6,72342204  | PCP003286 | XM_009362138 |
| PCP003288 | 7,914863459 | 7,888743249 | 8,026080745 | 8,431831861 | PCP003288 | XM_008352706 |
| PCP003290 | 6,906890596 | 7,029784146 | 7,285402219 | 7,526147081 |           |              |
| PCP003297 | 8,572397068 | 8,980139578 | 8,693486957 | 8,530094158 | PCP003297 | XR_667719    |
| PCP003310 | 8,648645193 | 8,511752654 | 8,63542792  | 8,438791853 |           |              |
| PCP003318 | 7,765998774 | 7,587440004 | 7,787902559 | 8,440163216 | PCP003318 | XM_018648315 |
| PCP003329 | 6,54426899  | 6,691115365 | 6,965784285 | 7,549438149 |           |              |
| PCP003331 | 8,016808288 | 7,922851957 | 8,018645301 | 8,67479253  |           |              |
| PCP003348 | 8,677120596 | 8,552015799 | 8,554588852 | 8,581200582 |           |              |
| PCP003360 | 6,894817763 | 7,169925001 | 7,076815597 | 6,984931073 | PCP003360 | XM_009358061 |
| PCP003368 | 7,815895594 | 7,839203788 | 8,075051225 | 8,361943774 |           |              |
| PCP003400 | 7,392317423 | 7,257387843 | 7,339850003 | 7,173227395 | PCP003400 | XM_009351185 |
| PCP003427 | 6,898812977 | 6,727920455 | 7,17990909  | 8,395191361 | PCP003427 | XM_009369089 |
| PCP003439 | 7,383704292 | 7,475733431 | 7,609769734 | 8,094500005 | PCP003439 | XM_018649828 |
| PCP003458 | 7,395148508 | 7,412188747 | 7,42063398  | 7,928784831 |           |              |
| PCP003471 | 6,898812977 | 6,938638658 | 7,300764373 | 7,705079392 | PCP003471 | XM_009376822 |
| PCP003472 | 7,597456684 | 7,309885571 | 7,8008999   | 8,380807357 | PCP003472 | XM_008343241 |
| PCP003477 | 7,336908182 | 7,475733431 | 7,321928095 | 7,044394119 | PCP003477 | XM_009378940 |
| PCP003485 | 8,28077077  | 8,520932916 | 8,700439718 | 9,380828997 | PCP003485 | XM_009378931 |
| PCP003490 | 7,849686575 | 7,965784285 | 7,992485211 | 7,826548487 | PCP003490 | XM_009378924 |
| PCP003515 | 8,314379315 | 8,314379315 | 8,305286574 | 8,678318438 |           |              |
| PCP003530 | 7           | 6,554588852 | 7,186559982 | 6,84962403  | PCP003530 | XM_009336069 |
| PCP003556 | 8,75043902  | 8,693486957 | 8,754887502 | 8,596189756 | PCP003556 | XM_008372409 |
| PCP003574 | 7,412188747 | 7,247927513 | 7,285402219 | 7,894817763 | PCP003574 | XM_009353633 |
| PCP003580 | 8,158205728 | 7,853808564 | 8,300718622 | 8,064311643 | PCP003580 | XM_009353620 |
| PCP003581 | 6,619559738 | 6,745909573 | 6,969587981 | 7,510408147 | PCP003581 | XM_009353615 |
| PCP003595 | 7,541716163 | 7,592457037 | 7,475733431 | 8,075051225 |           |              |

|           |             |             |             |             |           |              |
|-----------|-------------|-------------|-------------|-------------|-----------|--------------|
| PCP003609 | 7           | 6,857980995 | 7,094552786 | 7,847558521 | PCP003609 | XM_008364601 |
| PCP003618 | 8,535275377 | 8,212715235 | 8,614709844 | 8,939579214 | PCP003618 | XM_008383445 |
| PCP003626 | 7,018700931 | 7,263691734 | 7,681800619 | 8,592457037 | PCP003626 | XM_008360041 |
| PCP003627 | 7,557119022 | 7,118941073 | 7,641473777 | 7,930737338 |           |              |
| PCP003632 | 7,062531903 | 7,251056285 | 7,142923928 | 6,686500527 | PCP003632 | XM_009362388 |
| PCP003634 | 6,890811455 | 6,886672074 | 7,125878364 | 7,841281284 | PCP003634 | XM_009362390 |
| PCP003636 | 7,415065677 | 7,159871337 | 7,559721231 | 8,290018847 | PCP003636 | XM_008383484 |
| PCP003637 | 7,845490051 | 7,739240553 | 7,992485211 | 8,282300792 | PCP003637 | XM_009362402 |
| PCP003640 | 7,794415866 | 8,026080745 | 8,154818109 | 8,557157324 |           |              |
| PCP003644 | 7,209453366 | 7,206232954 | 7,118941073 | 7,61227877  |           |              |
| PCP003651 | 7,406587689 | 7,101503009 | 6,946379968 | 7,183188734 | PCP003651 | XM_017336465 |
| PCP003655 | 8,001858526 | 7,918863237 | 8,132731056 | 7,960001932 | PCP003655 | XM_008372027 |
| PCP003662 | 9,13442632  | 8,536558066 | 8,654636029 | 8,763776717 | PCP003662 | XM_018650885 |
| PCP003665 | 7,564759219 | 7,254272787 | 7,523561956 | 7,266786541 | PCP003665 | XM_009373718 |
| PCP003673 | 7,372168569 | 7,303780748 | 7,196430001 | 6,64385619  | PCP003673 | XM_009361876 |
| PCP003686 | 8,705044823 | 8,694636474 | 8,75043902  | 9,128432607 | PCP003686 | XM_009361852 |
| PCP003696 | 7,273049587 | 7,377904593 | 7,481153605 | 7,824449651 |           |              |
| PCP003706 | 7,554588852 | 7,843418611 | 7,592457037 | 7,231989133 | PCP003706 | XM_018651145 |
| PCP003708 | 7,406587689 | 7,526147081 | 7,688809791 | 8,001858526 | PCP003708 | XM_009374888 |
| PCP003715 | 7,822284016 | 8,031604721 | 8,196380818 | 8,420676082 | PCP003715 | XM_009374882 |
| PCP003723 | 7,912889336 | 7,745976779 | 7,882643049 | 8,348728154 |           |              |
| PCP003725 | 7,998139076 | 8,293103743 | 8,5824431   | 8,983934156 | PCP003725 | XM_009368394 |
| PCP003727 | 7,315874125 | 8,141238626 | 8,17990909  | 7,898873426 | PCP003727 | XM_009368385 |
| PCP003752 | 8,396604781 | 8,262094845 | 8,326429487 | 8,194756854 | PCP003752 | XM_008376230 |
| PCP003753 | 8,767091963 | 8,87958325  | 8,711942238 | 8,43325159  | PCP003753 | XM_008376220 |
| PCP003754 | 8,891783703 | 8,685344507 | 8,522267655 | 8,907882108 | PCP003754 | XM_008376199 |
| PCP003757 | 7,982993575 | 8,184875343 | 8,271463028 | 8,466260038 | PCP003757 | XM_008376152 |
| PCP003758 | 7,50247382  | 7,639015048 | 7,604886762 | 8,035238993 | PCP003758 | XM_008376144 |
| PCP003773 | 6,62935662  | 6,862079387 | 6,874428132 | 7,400879436 |           |              |
| PCP003787 | 7,684187561 | 7,71651083  | 7,665335917 | 7,602364826 | PCP003787 | XM_009368796 |
| PCP003790 | 8,064311643 | 7,986809101 | 8,199672345 | 8,880593701 | PCP003790 | XM_009368798 |
| PCP003793 | 7,273049587 | 7,372168569 | 7,055282436 | 6,714245518 | PCP003793 | XM_009368804 |
| PCP003796 | 8,554588852 | 8,266786541 | 8,225593068 | 8,247927513 |           |              |
| PCP003806 | 6,303780748 | 6,448405435 | 7,136170875 | 7,528805707 | PCP003806 | XM_009369711 |
| PCP003813 | 7,950293432 | 7,526147081 | 7,531381461 | 7,857980995 | PCP003813 | XM_008362831 |
| PCP003814 | 7,674757228 | 7,348728154 | 7,736943052 | 7,95419631  | PCP003814 | XM_018649922 |
| PCP003817 | 8,33391564  | 8,233619677 | 8,459431619 | 8,798730993 | PCP003817 | XM_009369730 |
| PCP003826 | 8,451211112 | 8,318904285 | 8,262094845 | 8,254225537 | PCP003826 | XM_018649001 |
| PCP003867 | 8,296136161 | 8,323415108 | 8,584962501 | 8,312882955 | PCP003867 | XM_009345820 |
| PCP003879 | 8,536558066 | 8,494535617 | 8,579956993 | 8,154818109 | PCP003879 | XM_009367445 |
| PCP003885 | 8,057071136 | 7,759355602 | 7,790055203 | 8,329437582 | PCP003885 | XM_009366817 |
| PCP003886 | 7,244791942 | 7,453929061 | 7,658211483 | 7,894817763 |           |              |
| PCP003899 | 8,239980333 | 9,017727086 | 9,297672907 | 8,375039431 | PCP003899 | XM_009366846 |
| PCP003906 | 6,454011343 | 6,81159947  | 7,166615031 | 7,589988142 | PCP003906 | XM_009344264 |
| PCP003910 | 8,156487632 | 8,024197765 | 7,796558821 | 7,409390936 | PCP003910 | XM_009379819 |
| PCP003912 | 7,166615031 | 7,282347131 | 7,569855608 | 8,39373366  | PCP003912 | XM_009379825 |

|           |             |             |             |             |           |              |
|-----------|-------------|-------------|-------------|-------------|-----------|--------------|
| PCP003916 | 8,482485305 | 8,614709844 | 8,614709844 | 8,513056419 |           |              |
| PCP003917 | 7,813781191 | 7,826548487 | 7,952275317 | 8,473015688 | PCP003917 | XM_008370686 |
| PCP003930 | 8,042589623 | 7,862141394 | 8,04072808  | 8,660602089 | PCP003930 | XM_009379856 |
| PCP003931 | 8,230404783 | 8,348728154 | 8,297695831 | 8,696967526 | PCP003931 | XM_009379857 |
| PCP003939 | 8,494535617 | 8,112022407 | 8,513056419 | 8,136119594 | PCP003939 | XR_665079    |
| PCP003965 | 7,269874722 | 7,018700931 | 7,641473777 | 7,624466495 | PCP003965 | XM_009362300 |
| PCP003966 | 7,868328714 | 7,934693407 | 8,124121312 | 8,42488011  | PCP003966 | XM_009362299 |
| PCP003983 | 6,988684687 | 6,853870927 | 7,42063398  | 7,541716163 | PCP003983 | NM_001293861 |
| PCP003988 | 8,21106088  | 8,222408523 | 8,440163216 | 8,762647796 | PCP003988 | XM_009371045 |
| PCP004005 | 7,894817763 | 7,584962501 | 7,672425342 | 8,227230852 | PCP004005 | XM_009371076 |
| PCP004014 | 8,201290788 | 8,54303182  | 8,732438807 | 8,898843202 |           |              |
| PCP004051 | 7,50779464  | 7,166615031 | 7,153095972 | 6,486553493 | PCP004051 | XM_008343777 |
| PCP004052 | 8,482485305 | 8,724513853 | 8,531381461 | 8,347267018 | PCP004052 | XM_017327284 |
| PCP004058 | 7,456724026 | 7,587440004 | 7,828644274 | 7,619633096 |           |              |
| PCP004080 | 7,330916878 | 7,63175911  | 7,878541438 | 7,409390936 | PCP004080 | XM_008344331 |
| PCP004083 | 6,815959618 | 6,759289016 | 7,062531903 | 7,609769734 |           |              |
| PCP004116 | 7,291585141 | 7,559721231 | 7,646234675 | 7,934693407 | PCP004116 | XM_018651464 |
| PCP004123 | 7,156538193 | 7,403693786 | 7,686500527 | 8,166564822 |           |              |
| PCP004138 | 7,285402219 | 7,429030064 | 7,562242424 | 7,894817763 | PCP004138 | XM_009335967 |
| PCP004148 | 8,129283017 | 8,468949809 | 8,77478706  | 9,350939182 | PCP004148 | XM_009337807 |
| PCP004151 | 6,31596467  | 6,700439718 | 6,918863237 | 7,864186145 | PCP004151 | XM_009366774 |
| PCP004152 | 6,981053471 | 7,173227395 | 7,574934058 | 7,757089938 | PCP004152 | XM_009337834 |
| PCP004186 | 8,189824559 | 8,350187812 | 8,405141463 | 9,20701432  |           |              |
| PCP004188 | 8,891783703 | 8,901862467 | 8,908902953 | 8,398016818 | PCP004188 | XM_008384441 |
| PCP004200 | 7,14974712  | 7,324900589 | 7,62935662  | 7,741466986 |           |              |
| PCP004202 | 8,54303182  | 8,296136161 | 8,48651327  | 7,990557838 | PCP004202 | XM_009347819 |
| PCP004212 | 7,395148508 | 7,321928095 | 7,50247382  | 7,965784285 | PCP004212 | XM_018647006 |
| PCP004213 | 7,231989133 | 7,129283017 | 7,714245518 | 8,224001674 | PCP004213 | XM_009355930 |
| PCP004234 | 7,047996356 | 7,266786541 | 7,247927513 | 7,754887502 | PCP004234 | XM_009369571 |
| PCP004254 | 7,815895594 | 7,539158811 | 7,723353774 | 7,64385619  |           |              |
| PCP004276 | 5,101397952 | 5,841218374 | 7,646234675 | 9,094526396 | PCP004276 | XM_008359795 |
| PCP004282 | 8,125826717 | 7,988684687 | 8,139551352 | 8,572397068 | PCP004282 | XM_009371716 |
| PCP004291 | 6,828707735 | 6,589913261 | 6,737010678 | 7,336908182 | PCP004291 | XM_009357283 |
| PCP004319 | 7,604886762 | 7,721099189 | 7,684187561 | 7,42063398  | PCP004319 | XM_009347248 |
| PCP004320 | 7,651051691 | 7,934693407 | 7,890750668 | 7,587440004 | PCP004320 | XM_009347250 |
| PCP004345 | 7,199672345 | 7,475733431 | 6,857980995 | 6,914923239 | PCP004345 | XM_018651235 |
| PCP004349 | 7,464913269 | 7,491853096 | 7,241554209 | 7,336908182 |           |              |
| PCP004359 | 7,176621973 | 7,549438149 | 7,431873638 | 7,324900589 | PCP004359 | XM_017324919 |
| PCP004379 | 7,273049587 | 6,934634441 | 6,926829678 | 6,798698597 | PCP004379 | XM_009376546 |
| PCP004380 | 8,420676082 | 8,416459769 | 8,258942852 | 8,142974967 |           |              |
| PCP004400 | 8,592457037 | 8,715378619 | 8,438791853 | 8,360495967 |           |              |
| PCP004408 | 7,582480735 | 7,646234675 | 7,884658968 | 8,498530123 | PCP004408 | XM_009366026 |
| PCP004410 | 8,584962501 | 8,341318667 | 8,485145023 | 9,18157469  | PCP004410 | XM_008357533 |
| PCP004418 | 7,651051691 | 8,078577814 | 7,914863459 | 7,982993575 |           |              |
| PCP004420 | 8,215921225 | 8,463524373 | 8,803065551 | 8,899870461 | PCP004420 | XM_008390607 |
| PCP004434 | 8,559682997 | 8,495855027 | 8,584962501 | 8,972491628 |           |              |



|           |             |             |             |             |           |              |
|-----------|-------------|-------------|-------------|-------------|-----------|--------------|
| PCP004437 | 8,623259662 | 8,297695831 | 8,427648072 | 8,137862104 | PCP004437 | XM_009364151 |
| PCP004440 | 6,569855608 | 6,857980995 | 7,040782866 | 7,515699838 | PCP004440 | XM_008354562 |
| PCP004450 | 6,448405435 | 6,958030641 | 7,115511897 | 8,948367232 | PCP004450 | XM_009380469 |
| PCP004471 | 8,118941073 | 8,174925683 | 8,17990909  | 8,092757141 | PCP004471 | XM_008340343 |
| PCP004473 | 7,515699838 | 6,934634441 | 7,069637728 | 6,737010678 | PCP004473 | XM_008389353 |
| PCP004478 | 8,618385502 | 8,779161208 | 8,758223215 | 8,757123282 | PCP004478 | XM_018645962 |
| PCP004485 | 7,464913269 | 7,260496187 | 7,860031646 | 7,653418353 | PCP004485 | XM_009348803 |
| PCP004494 | 7,963878669 | 8,171577143 | 8,495855027 | 8,912889336 | PCP004494 | XR_001952113 |
| PCP004498 | 8,791162889 | 8,776992236 | 8,84024291  | 8,688844752 | PCP004498 | XM_008368145 |
| PCP004553 | 7,44567705  | 7,291585141 | 7,539158811 | 7,866228001 | PCP004553 | XM_009345191 |
| PCP004567 | 7,28845085  | 7,339850003 | 7,336908182 | 7,193081765 |           |              |
| PCP004573 | 6,464831606 | 6,894817763 | 7,291585141 | 7,499845887 | PCP004573 | XM_008343615 |
| PCP004584 | 8,247927513 | 7,599912842 | 8,422064766 | 9,695228291 | PCP004584 | XM_009341259 |
| PCP004593 | 7,372168569 | 7,536596918 | 7,528805707 | 8,117227504 | PCP004593 | XM_018647710 |
| PCP004611 | 7,018700931 | 7,047996356 | 7,294620749 | 7,807354922 | PCP004611 | XM_009371591 |
| PCP004618 | 6,832890014 | 6,579994693 | 6,99242856  | 8,243173983 | PCP004618 | XM_008381594 |
| PCP004653 | 8,481113232 | 8,773699688 | 8,626913629 | 8,21916852  | PCP004653 | XM_008341806 |
| PCP004666 | 7,434628228 | 7,74819285  | 7,599912842 | 7,50247382  | PCP004666 | XM_009370964 |
| PCP004672 | 8,502513601 | 8,416459769 | 8,453970202 | 8,347267018 | PCP004672 | XM_018648007 |
| PCP004695 | 8,30833903  | 8,379378367 | 8,21757002  | 8,277659361 | PCP004695 | XM_008350202 |
| PCP004720 | 7,855927425 | 7,886733033 | 7,88062431  | 7,489205728 |           |              |
| PCP004744 | 6,890811455 | 7,029784146 | 7,28845085  | 6,841344192 | PCP004744 | XM_009355812 |
| PCP004764 | 8,703903573 | 8,662953148 | 8,792237182 | 9,101529272 | PCP004764 | XM_009361366 |
| PCP004786 | 8,910882535 | 8,735826768 | 8,658211483 | 8,475733431 |           |              |
| PCP004810 | 8,249492747 | 8,564797319 | 8,314379315 | 8,696967526 | PCP004810 | XM_008369003 |
| PCP004822 | 7,50779464  | 7,260496187 | 7,518299077 | 7,193081765 | PCP004822 | XM_009361983 |
| PCP004852 | 7,315874125 | 7,202907418 | 7,040782866 | 6,614709844 |           |              |
| PCP004960 | 7,61227877  | 7,963878669 | 7,798763389 | 7,765998774 | PCP004960 | XM_009338918 |
| PCP004961 | 6,662917555 | 7,372168569 | 6,902917719 | 7,658211483 | PCP004961 | XM_008390706 |
| PCP004970 | 7,462134139 | 6,798698597 | 7,30679083  | 7,426264755 | PCP004970 | XM_009338940 |
| PCP004997 | 7,389480771 | 7,327956767 | 7,459431619 | 8,271463028 | PCP004997 | XM_009363407 |
| PCP005005 | 7,602364826 | 7,718841075 | 7,42063398  | 7,567347696 |           |              |
| PCP005015 | 8,14974712  | 7,860031646 | 8,038918989 | 7,794415866 |           |              |
| PCP005016 | 8,08390476  | 7,750405521 | 8,382278171 | 9,606090543 | PCP005016 | XM_009363378 |
| PCP005044 | 8,087462841 | 7,992485211 | 7,910912508 | 7,63175911  |           |              |
| PCP005062 | 7,882643049 | 7,900866808 | 8,003770871 | 7,478405614 | PCP005062 | XM_018652121 |
| PCP005073 | 8,28692734  | 8,159871337 | 8,265239967 | 8,029728942 |           |              |
| PCP005074 | 7,924812504 | 7,761551232 | 7,924812504 | 8,30833903  | PCP005074 | XM_009341260 |
| PCP005076 | 7,062531903 | 8,014968933 | 8,382278171 | 10,83709964 | PCP005076 | XM_009341258 |
| PCP005082 | 6,392317423 | 7,321928095 | 6,392317423 | 7,790055203 |           |              |
| PCP005088 | 7,796558821 | 7,868328714 | 8,073231127 | 8,536558066 |           |              |
| PCP005096 | 8,251103639 | 8,075051225 | 7,832890014 | 7,122362117 | PCP005096 | XM_009380061 |
| PCP005110 | 7,247927513 | 7,173227395 | 7,333870928 | 8,423452115 | PCP005110 | XR_001953357 |
| PCP005116 | 8,266786541 | 8,159871337 | 8,35169016  | 8,642665475 | PCP005116 | XM_009360373 |
| PCP005119 | 8,460783512 | 8,501160452 | 8,659389441 | 8,945443836 |           |              |
| PCP005129 | 6,759289016 | 6,961970533 | 7,389480771 | 7,624466495 | PCP005129 | XM_009360353 |

|           |             |             |             |             |           |              |
|-----------|-------------|-------------|-------------|-------------|-----------|--------------|
| PCP005143 | 7,098032083 | 7,159871337 | 7,040782866 | 6,965784285 |           |              |
| PCP005149 | 7,672425342 | 7,526147081 | 7,688809791 | 7,357552005 | PCP005149 | XM_009358490 |
| PCP005162 | 7,073284692 | 7,357552005 | 7,564759219 | 7,71651083  | PCP005162 | XM_009358469 |
| PCP005167 | 8,153146652 | 8,198052084 | 8,562242424 | 9,123267853 | PCP005167 | XM_009358462 |
| PCP005168 | 7,988684687 | 8,037107627 | 8,001858526 | 8,493174961 | PCP005168 | XM_009358459 |
| PCP005172 | 7,406587689 | 7,50517639  | 7,832890014 | 7,241554209 | PCP005172 | XM_008388353 |
| PCP005176 | 6,930737338 | 6,691115365 | 7,003714662 | 7,351645995 | PCP005176 | XM_009358447 |
| PCP005183 | 7,142923928 | 7,46760555  | 7,28845085  | 7,040782866 |           |              |
| PCP005184 | 7,609769734 | 7,711976642 | 7,711976642 | 7,54689446  | PCP005184 | XM_011466072 |
| PCP005199 | 7,604886762 | 7,990557838 | 8,252665432 | 9,172427509 | PCP005199 | XM_018650255 |
| PCP005224 | 6,81159947  | 7,297649983 | 7,238404739 | 7,058857621 | PCP005224 | XM_009340847 |
| PCP005240 | 8,164906927 | 8,108524457 | 7,944448531 | 7,28845085  | PCP005240 | XM_017323704 |
| PCP005254 | 7,750405521 | 7,952275317 | 8,39373366  | 9,026053072 | PCP005254 | XR_666720    |
| PCP005266 | 8,282300792 | 8,204571144 | 8,532667615 | 8,407989993 | PCP005266 | XM_018652320 |
| PCP005269 | 7,562242424 | 7,607330314 | 7,759355602 | 8,254225537 | PCP005269 | XM_009380207 |
| PCP005274 | 8,69115027  | 8,420676082 | 8,282300792 | 7,912889336 |           |              |
| PCP005284 | 7,225641265 | 7,389480771 | 7,718841075 | 7,944448531 |           |              |
| PCP005301 | 8,220765252 | 8,458078458 | 8,710806434 | 8,41079052  | PCP005301 | XM_018647077 |
| PCP005315 | 8,273002948 | 8,390899794 | 8,372125027 | 8,922822231 | PCP005315 | XM_009369242 |
| PCP005323 | 9,1807297   | 8,239980333 | 9,012149614 | 8,146339557 | PCP005323 | XM_009369261 |
| PCP005332 | 7,196430001 | 7,46760555  | 7,357552005 | 7,231989133 |           |              |
| PCP005334 | 8,626913629 | 8,780277286 | 8,97441459  | 8,782441329 | PCP005334 | XM_008350718 |
| PCP005338 | 8,39373366  | 8,497173232 | 8,666508075 | 9,002815016 | PCP005338 | XR_001787178 |
| PCP005339 | 8,014968933 | 7,714245518 | 7,963878669 | 7,462134139 | PCP005339 | XM_009374468 |
| PCP005355 | 7,986809101 | 8,037107627 | 8,181549844 | 8,522267655 |           |              |
| PCP005357 | 8,016808288 | 7,684187561 | 7,783522135 | 7,624466495 | PCP005357 | XM_009380153 |
| PCP005364 | 7,50517639  | 6,54426899  | 7,260496187 | 6,80309785  | PCP005364 | XM_009380161 |
| PCP005374 | 7,597456684 | 8,382278171 | 8,406545173 | 9,272233193 | PCP005374 | NM_001328902 |
| PCP005379 | 7,318949464 | 7,462134139 | 7,670089681 | 8,060695932 | PCP005379 | XM_009375909 |
| PCP005380 | 7,456724026 | 7,291585141 | 7,922851957 | 7,815895594 | PCP005380 | XM_009375907 |
| PCP005385 | 8,762647796 | 8,831845581 | 8,924812504 | 8,76927586  | PCP005385 | XM_018651378 |
| PCP005399 | 6,380764075 | 6,695854658 | 7,142923928 | 8,315919398 | PCP005399 | XM_009341412 |
| PCP005425 | 6,559644763 | 6,750472519 | 6,878602742 | 7,372168569 | PCP005425 | XM_009357893 |
| PCP005440 | 8,441574774 | 8,586201784 | 8,692336525 | 8,532667615 | PCP005440 | XM_009357924 |
| PCP005473 | 7,163196797 | 7,080337882 | 7,263691734 | 6,624539604 | PCP005473 | XM_009346139 |
| PCP005474 | 7,864186145 | 7,655852677 | 8,098032083 | 8,24474438  |           |              |
| PCP005484 | 7,073284692 | 7,562242424 | 7,894817763 | 8,554588852 | PCP005484 | XM_008344092 |
| PCP005486 | 8,448446735 | 8,463524373 | 8,541754876 | 8,241601875 | PCP005486 | XM_009378561 |
| PCP005507 | 7,166615031 | 7,108524457 | 7,665335917 | 8,458078458 |           |              |
| PCP005518 | 7,910912508 | 7,592457037 | 7,890750668 | 8,142974967 |           |              |
| PCP005527 | 8,545620932 | 8,350187812 | 8,75043902  | 8,711942238 |           |              |
| PCP005528 | 8,46760555  | 8,449850215 | 8,836050355 | 9,418548384 | PCP005528 | XM_009375454 |
| PCP005530 | 7,536596918 | 7,559721231 | 7,843418611 | 8,489165579 | PCP005530 | XM_009375456 |
| PCP005531 | 8,470333494 | 8,156487632 | 8,080391184 | 7,862141394 | PCP005531 | XM_009375457 |
| PCP005570 | 8,204571144 | 8,514398461 | 8,225593068 | 7,936637939 | PCP005570 | XM_009362501 |
| PCP005572 | 8,350187812 | 7,969645536 | 7,63175911  | 7,166615031 | PCP005572 | XM_009355756 |

|           |             |             |             |             |           |              |
|-----------|-------------|-------------|-------------|-------------|-----------|--------------|
| PCP005573 | 7,681800619 | 8,029728942 | 7,73470962  | 8,04072808  | PCP005573 | XM_009351615 |
| PCP005578 | 7,868328714 | 7,42063398  | 7,730164413 | 7,339850003 | PCP005578 | XM_009344811 |
| PCP005591 | 6,564835417 | 6,874428132 | 6,934634441 | 7,202907418 | PCP005591 | XM_009378141 |
| PCP005606 | 8,35169016  | 8,564797319 | 8,929761415 | 9,378663341 | PCP005606 | XM_009342522 |
| PCP005608 | 8,206184105 | 8,220765252 | 8,345760055 | 8,158205728 |           |              |
| PCP005610 | 7,058857621 | 7,54689446  | 7,423494135 | 7,772611496 | PCP005610 | XM_009342514 |
| PCP005620 | 6,857980995 | 6,609843592 | 7,051698368 | 7,247927513 | PCP005620 | XM_008384299 |
| PCP005621 | 8,215921225 | 8,209453366 | 8,314379315 | 8,978224236 | PCP005621 | XM_008384300 |
| PCP005627 | 8,082149041 | 8,174925683 | 7,952275317 | 7,619633096 | PCP005627 | XM_009346199 |
| PCP005636 | 7,63175911  | 7,87036472  | 7,982993575 | 8,196380818 |           |              |
| PCP005650 | 8,110248388 | 8,236827423 | 8,258942852 | 8,139551352 |           |              |
| PCP005656 | 7,330916878 | 7,660566438 | 7,412188747 | 7,544346278 |           |              |
| PCP005665 | 7,360452072 | 7,254272787 | 7,403693786 | 7,876516947 | PCP005665 | XM_009370664 |
| PCP005675 | 8,273002948 | 8,501160452 | 8,436003553 | 7,826548487 | PCP005675 | XM_009356135 |
| PCP005678 | 8,583722152 | 8,74708524  | 8,725638921 | 8,206184105 | PCP005678 | XM_009356125 |
| PCP005684 | 7,46760555  | 7,473056289 | 7,42063398  | 6,781359714 | PCP005684 | XM_009352772 |
| PCP005707 | 8,607330314 | 8,603626345 | 8,636624621 | 8,584962501 | PCP005707 | XM_009378491 |
| PCP005721 | 8,294620749 | 8,311385042 | 8,41079052  | 8,775873612 | PCP005721 | XM_009378773 |
| PCP005741 | 8,053491515 | 7,95419631  | 7,979167931 | 8,526186214 |           |              |
| PCP005744 | 7,634230226 | 7,159871337 | 6,996275749 | 6,934634441 |           |              |
| PCP005748 | 6,845490051 | 6,727920455 | 7,040782866 | 7,429030064 | PCP005748 | XM_009357861 |
| PCP005750 | 7,677155841 | 7,62935662  | 7,88062431  | 7,677155841 | PCP005750 | XM_009357855 |
| PCP005751 | 6,918863237 | 7,579919292 | 7,453929061 | 7,725673    | PCP005751 | XM_009357850 |
| PCP005757 | 8,441574774 | 8,54303182  | 9,049848549 | 9,203763987 | PCP005757 | XM_009357841 |
| PCP005761 | 7,090959258 | 6,934634441 | 7,199672345 | 6,81159947  | PCP005761 | XM_009364826 |
| PCP005762 | 7,730164413 | 7,906890596 | 7,95419631  | 8,383704292 |           |              |
| PCP005776 | 8,110248388 | 7,732472726 | 8,033423002 | 8,290018847 |           |              |
| PCP005777 | 8,033423002 | 7,992485211 | 8,173277373 | 8,564797319 |           |              |
| PCP005784 | 8,044394119 | 7,944448531 | 8,201290788 | 7,924812504 |           |              |
| PCP005793 | 8,089212109 | 8,120652609 | 8,136119594 | 7,822284016 | PCP005793 | XM_018645479 |
| PCP005795 | 8,296136161 | 8,215921225 | 8,184875343 | 8,603626345 |           |              |
| PCP005813 | 7,409390936 | 7,686500527 | 7,300764373 | 7,557119022 |           |              |
| PCP005817 | 7,77478706  | 7,956114749 | 8,158205728 | 7,960001932 | PCP005817 | XM_018645949 |
| PCP005827 | 6,981053471 | 7,173227395 | 6,763809907 | 6,737010678 | PCP005827 | XM_018647575 |
| PCP005855 | 7,736943052 | 7,61227877  | 7,574934058 | 7,50517639  | PCP005855 | XM_009361775 |
| PCP005862 | 7,257387843 | 7,058857621 | 7,518299077 | 7,942514505 | PCP005862 | XM_009361683 |
| PCP005874 | 6,677085351 | 6,853870927 | 7,047996356 | 7,572359168 | PCP005874 | XM_009348614 |
| PCP005886 | 7,847558521 | 7,423494135 | 7,417852515 | 6,695854658 | PCP005886 | XM_018649286 |
| PCP005889 | 8,17990909  | 8,239980333 | 8,178266468 | 8,662953148 | PCP005889 | XM_009366560 |
| PCP005890 | 6,727920455 | 7,163196797 | 7,366322214 | 7,920829209 | PCP005890 | XM_009366559 |
| PCP005898 | 8,299208018 | 8,569855608 | 8,306836389 | 7,815895594 | PCP005898 | XM_018651877 |
| PCP005903 | 6,853870927 | 7,662988741 | 7,098032083 | 7,037052702 | PCP005903 | XM_009368630 |
| PCP005917 | 7,377904593 | 8,110248388 | 8,299208018 | 8,847589839 | PCP005917 | XM_009342616 |
| PCP005925 | 7,950293432 | 7,8008999   | 7,918863237 | 7,617136829 | PCP005925 | XM_017325949 |
| PCP005926 | 8,016808288 | 7,63175911  | 7,655852677 | 7,153095972 | PCP005926 | XM_008384235 |
| PCP005944 | 8,353146825 | 8,268331458 | 8,395191361 | 8,255831156 | PCP005944 | XM_009342617 |

|           |             |             |             |             |           |              |
|-----------|-------------|-------------|-------------|-------------|-----------|--------------|
| PCP005953 | 6,930737338 | 7,539158811 | 7,868328714 | 8,668884984 |           |              |
| PCP005968 | 7,146390476 | 7,3458044   | 7,315874125 | 7,711976642 | PCP005968 | XM_009372450 |
| PCP005975 | 8,393733366 | 8,591223118 | 8,62450305  | 9,059804103 | PCP005975 | XM_009340497 |
| PCP005977 | 7,336908182 | 7,115511897 | 7,386552314 | 8,031604721 | PCP005977 | XM_009340492 |
| PCP005980 | 7,431873638 | 7,732472726 | 7,783522135 | 8,026080745 |           |              |
| PCP005991 | 7,906890596 | 7,544346278 | 8,154818109 | 8,214319121 | PCP005991 | XM_008346989 |
| PCP005993 | 7,956114749 | 8,026080745 | 7,992485211 | 7,912889336 | PCP005993 | XM_009337471 |
| PCP006039 | 7,415065677 | 7,639015048 | 7,658211483 | 8,08390476  | PCP006039 | XM_009369479 |
| PCP006044 | 7,864186145 | 8,176572111 | 7,864186145 | 7,199672345 |           |              |
| PCP006047 | 8,35169016  | 8,255831156 | 8,344295908 | 8,075051225 | PCP006047 | XM_009375889 |
| PCP006048 | 7,08395793  | 7,324900589 | 7,285402219 | 7,768184325 | PCP006048 | XR_664884    |
| PCP006086 | 7,437377568 | 7,206232954 | 7,330916878 | 7,260496187 | PCP006086 | XM_008350269 |
| PCP006091 | 7,723353774 | 7,670089681 | 7,651051691 | 7,531381461 |           |              |
| PCP006093 | 8,098032083 | 8,071462363 | 8,051643995 | 7,440204752 | PCP006093 | XM_009375915 |
| PCP006100 | 8,342830273 | 7,904905525 | 8,110248388 | 8,417852515 |           |              |
| PCP006108 | 7,950293432 | 7,815895594 | 8,075051225 | 8,68183575  | PCP006108 | XM_008345096 |
| PCP006113 | 7,660566438 | 7,851749041 | 7,022367813 | 5,832890014 | PCP006113 | XM_009375132 |
| PCP006121 | 6,988684687 | 7,321928095 | 7,494495616 | 8,001858526 | PCP006121 | XM_018648841 |
| PCP006172 | 7,876516947 | 7,839203788 | 7,946438456 | 7,739240553 | PCP006172 | XM_009359150 |
| PCP006175 | 6,874428132 | 6,777025123 | 6,84962403  | 7,636624621 | PCP006175 | XM_009359154 |
| PCP006176 | 8,166564822 | 8,096293483 | 8,265239967 | 8,044394119 |           |              |
| PCP006190 | 6,54951516  | 7,30679083  | 7,670089681 | 7,815895594 |           |              |
| PCP006214 | 7,08395793  | 6,914923239 | 7,212666605 | 7,592457037 | PCP006214 | XM_009374163 |
| PCP006216 | 8,519636253 | 8,54689446  | 8,540438054 | 8,901862467 |           |              |
| PCP006224 | 6,926829678 | 7,489205728 | 7,723353774 | 8,009380767 | PCP006224 | XM_008361449 |
| PCP006226 | 8,950322598 | 8,139551352 | 8,527477006 | 8,713111526 | PCP006226 | XM_009358466 |
| PCP006229 | 7,42063398  | 7,406587689 | 7,417852515 | 7,146390476 | PCP006229 | XM_009344656 |
| PCP006235 | 8,613494819 | 8,609806663 | 8,591223118 | 8,491853096 | PCP006235 | XM_009335949 |
| PCP006241 | 8,495855027 | 8,375039431 | 8,436003553 | 9,000929563 | PCP006241 | XM_009367544 |
| PCP006299 | 7,967687386 | 7,904905525 | 7,641473777 | 6,977279923 | PCP006299 | XM_008360236 |
| PCP006305 | 7,403693786 | 7,489205728 | 7,523561956 | 7,324900589 | PCP006305 | XM_018645795 |
| PCP006315 | 7,567347696 | 7,604886762 | 7,6794801   | 8,120652609 | PCP006315 | XM_008342446 |
| PCP006342 | 7,456724026 | 7,478405614 | 7,442943496 | 7,354646096 | PCP006342 | XM_009342491 |
| PCP006369 | 7,087462841 | 7,330916878 | 7,602364826 | 7,922851957 | PCP006369 | XM_009378066 |
| PCP006383 | 7,584962501 | 7,541716163 | 7,294620749 | 7,040782866 |           |              |
| PCP006413 | 8,32791187  | 8,113742166 | 7,948367232 | 7,602364826 | PCP006413 | XM_018651433 |
| PCP006433 | 6,732404887 | 6,732404887 | 7,040782866 | 7,348728154 |           |              |
| PCP006438 | 7,189824559 | 7,051698368 | 7,406587689 | 7,815895594 | PCP006438 | XM_009340480 |
| PCP006486 | 7,958088658 | 8,024197765 | 8,198052084 | 8,703903573 | PCP006486 | XM_018647112 |
| PCP006487 | 6,902917719 | 6,87036472  | 7,014913158 | 7,533952624 | PCP006487 | XM_018649333 |
| PCP006548 | 8,046196362 | 8,303780748 | 8,416459769 | 8,022367813 |           |              |
| PCP006549 | 7,908872939 | 7,796558821 | 7,88062431  | 7,772611496 | PCP006549 | XM_009367739 |
| PCP006568 | 6,705010253 | 6,857980995 | 6,965784285 | 7,658211483 |           |              |
| PCP006583 | 8,722226922 | 8,583722152 | 8,596189756 | 8,39373366  | PCP006583 | XM_009372596 |
| PCP006585 | 7,309885571 | 7,266786541 | 7,486473046 | 7,996219247 | PCP006585 | XM_018650613 |
| PCP006596 | 7,464913269 | 6,981053471 | 7,297649983 | 7,481153605 | PCP006596 | XM_009372630 |

|           |             |             |             |             |           |              |
|-----------|-------------|-------------|-------------|-------------|-----------|--------------|
| PCP006599 | 6,409390936 | 6,906890596 | 6,853870927 | 7,423494135 | PCP006599 | XM_008372051 |
| PCP006608 | 7,940577883 | 8,092757141 | 7,655852677 | 6,981053471 | PCP006608 | XM_008372038 |
| PCP006629 | 7,087462841 | 6,824386003 | 6,950351762 | 6,714245518 |           |              |
| PCP006647 | 8,523561956 | 8,576181982 | 8,592457037 | 8,54689446  | PCP006647 | XM_008376195 |
| PCP006654 | 8,873444113 | 8,735826768 | 8,545620932 | 8,139551352 | PCP006654 | XM_008358374 |
| PCP006662 | 8,075051225 | 8,038918989 | 8           | 7,924812504 | PCP006662 | XM_008358378 |
| PCP006673 | 8,194756854 | 8,176572111 | 8,386595423 | 9,120678526 | PCP006673 | XM_008376237 |
| PCP006674 | 7,173227395 | 7,136170875 | 8,191454081 | 9,905883363 |           |              |
| PCP006688 | 8,344295908 | 8,61717357  | 8,912889336 | 9,369226538 | PCP006688 | XM_009340819 |
| PCP006691 | 7,383704292 | 7,189824559 | 8,057071136 | 7,17990909  | PCP006691 | XM_009340881 |
| PCP006697 | 8,060695932 | 8,550746785 | 8,759322309 | 9,184875343 | PCP006697 | XM_009340998 |
| PCP006710 | 8,589950702 | 8,398016818 | 8,677120596 | 9,184057088 |           |              |
| PCP006745 | 8,434628228 | 8,5824431   | 8,736976865 | 8,614709844 | PCP006745 | XM_009371206 |
| PCP006746 | 8,321928095 | 8,338379842 | 8,555854491 | 8,919846558 | PCP006746 | XM_009371204 |
| PCP006747 | 7,040782866 | 7,235248379 | 7,21916852  | 7,665335917 | PCP006747 | XM_009371202 |
| PCP006762 | 7,992485211 | 8,189824559 | 8,360495967 | 8,601139355 |           |              |
| PCP006766 | 8,810571635 | 8,372125027 | 8,268331458 | 8,320439548 | PCP006766 | XM_009371166 |
| PCP006767 | 8,258942852 | 8,246360579 | 8,491853096 | 8,845490051 |           |              |
| PCP006769 | 6,981053471 | 7,026025399 | 7,442943496 | 7,672425342 | PCP006769 | XM_009371232 |
| PCP006771 | 3,368768349 | 6,351734323 | 9,54303182  | 12,97560977 | PCP006771 | NM_001293928 |
| PCP006776 | 8,50779464  | 8,568602197 | 8,645045922 | 8,540438054 | PCP006776 | XM_009353306 |
| PCP006778 | 6,996275749 | 6,97349648  | 7,047996356 | 8,347267018 |           |              |
| PCP006817 | 7,653418353 | 7,636624621 | 8,236827423 | 8,176572111 | PCP006817 | XM_017332533 |
| PCP006822 | 6,815959618 | 7,14974712  | 7,244791942 | 7,783522135 | PCP006822 | XM_008235058 |
| PCP006833 | 8,055282436 | 8,571107931 | 8,604849706 | 9,004698008 | PCP006833 | XM_008370962 |
| PCP006835 | 7,051698368 | 7,63175911  | 7,820178962 | 8,423452115 |           |              |
| PCP006839 | 7,30679083  | 7,125878364 | 7,169925001 | 7,026025399 | PCP006839 | XM_008368155 |
| PCP006840 | 7,342785837 | 7,497213158 | 7,602364826 | 7,087462841 | PCP006840 | XM_009359506 |
| PCP006852 | 8,158205728 | 8,363390129 | 8,660602089 | 8,474395481 |           |              |
| PCP006864 | 8,189824559 | 7,303780748 | 8,020535537 | 8,350187812 | PCP006864 | XM_008356073 |
| PCP006866 | 8,662953148 | 8,096293483 | 8,024197765 | 7,50517639  | PCP006866 | XM_017328303 |
| PCP006906 | 7,101503009 | 7,022367813 | 7,440204752 | 8,018645301 |           |              |
| PCP006908 | 7,960001932 | 7,944448531 | 8,161535025 | 8,795487741 | PCP006908 | XM_008347833 |
| PCP006916 | 8,77148947  | 8,835008208 | 8,809510912 | 8,709669735 | PCP006916 | XM_008373679 |
| PCP006933 | 7,129283017 | 6,589913261 | 7,040782866 | 7,073284692 | PCP006933 | XM_008373658 |
| PCP006945 | 7,202907418 | 7,567347696 | 7,582480735 | 7,936637939 |           |              |
| PCP006957 | 7,698149009 | 7,569855608 | 7,6794801   | 7,50247382  | PCP006957 | XM_009367364 |
| PCP006967 | 7,193081765 | 7,254272787 | 7,058857621 | 6,996275749 |           |              |
| PCP006973 | 7,839203788 | 7,938579853 | 7,761551232 | 8,290018847 | PCP006973 | XM_009352882 |
| PCP006975 | 8,347267018 | 7,803033252 | 7,83080039  | 7,739240553 | PCP006975 | XM_018646292 |
| PCP006991 | 7,483815777 | 7,392317423 | 7,375039431 | 7,857980995 |           |              |
| PCP006996 | 7,470292816 | 7,971543554 | 7,50779464  | 8,038918989 |           |              |
| PCP006999 | 7,539158811 | 7,667679281 | 8,016808288 | 8,294620749 |           |              |
| PCP007000 | 7,363433935 | 7,707359132 | 7,843418611 | 7,95419631  | PCP007000 | XM_008378548 |
| PCP007008 | 8,944477815 | 8,796591265 | 8,77478706  | 8,762647796 |           |              |
| PCP007024 | 6,60481265  | 7,058857621 | 7,520972191 | 7,920829209 | PCP007024 | XM_009355866 |

|           |             |             |             |             |           |              |
|-----------|-------------|-------------|-------------|-------------|-----------|--------------|
| PCP007025 | 7,924812504 | 8,110248388 | 8,625708843 | 8,926800034 | PCP007025 | XM_009355862 |
| PCP007053 | 7,950293432 | 7,988684687 | 8,096293483 | 8,658211483 | PCP007053 | XM_009338069 |
| PCP007059 | 8,127581695 | 8,420676082 | 8,632995197 | 9,277682605 | PCP007059 | XM_009350042 |
| PCP007067 | 7,969645536 | 8,151422517 | 7,898873426 | 8,569855608 | PCP007067 | XM_009359409 |
| PCP007080 | 7,429030064 | 7,42063398  | 7,459431619 | 6,97349648  |           |              |
| PCP007085 | 7,884658968 | 7,781359714 | 7,845490051 | 8,548166865 |           |              |
| PCP007088 | 8,604849706 | 8,83709175  | 8,646270682 | 8,166564822 |           |              |
| PCP007099 | 8,341318667 | 8,141238626 | 7,95419631  | 7,499845887 | PCP007099 | XM_009360519 |
| PCP007103 | 7,727920455 | 7,938579853 | 7,634230226 | 7,95419631  | PCP007103 | XM_009360517 |
| PCP007115 | 7,824449651 | 7,674757228 | 7,918863237 | 8,985841937 |           |              |
| PCP007126 | 8,515699838 | 8,498530123 | 8,716545126 | 9,054387253 |           |              |
| PCP007153 | 8,073231127 | 7,723353774 | 7,77478706  | 8,033423002 | PCP007153 | XM_018644347 |
| PCP007160 | 9,167418146 | 8,820178962 | 8,528766645 | 8,255831156 | PCP007160 | XM_008383213 |
| PCP007167 | 7,357552005 | 7,497213158 | 7,518299077 | 7,973439079 | PCP007167 | XM_009364844 |
| PCP007168 | 8,235200503 | 7,662988741 | 7,415065677 | 5,746043983 | PCP007168 | XM_009364840 |
| PCP007169 | 6,62935662  | 6,878602742 | 7,058857621 | 7,448488033 | PCP007169 | XM_009364831 |
| PCP007189 | 8,082149041 | 7,779194046 | 7,494495616 | 7,489205728 |           |              |
| PCP007191 | 8,422064766 | 8,395191361 | 8,243173983 | 8,212715235 | PCP007191 | XM_009354495 |
| PCP007205 | 7,398059585 | 7,494495616 | 7,790055203 | 8,001858526 | PCP007205 | XR_001952619 |
| PCP007224 | 8,379378367 | 8,364878797 | 8,479780264 | 9,027905997 | PCP007224 | XM_018647760 |
| PCP007225 | 7,189824559 | 7,440204752 | 7,386552314 | 7,860031646 | PCP007225 | XM_018647759 |
| PCP007240 | 7,473056289 | 7,189824559 | 7,073284692 | 6,886672074 | PCP007240 | XM_018646976 |
| PCP007243 | 7,169925001 | 7,159871337 | 8,144658243 | 7,50247382  | PCP007243 | XM_009355829 |
| PCP007244 | 8,315919398 | 8,430452552 | 8,586201784 | 9,396604781 |           |              |
| PCP007245 | 6,686500527 | 6,961970533 | 8,684152487 | 12,60478486 |           |              |
| PCP007270 | 7,303780748 | 7,868328714 | 7,868328714 | 8,254225537 | PCP007270 | XM_008359473 |
| PCP007277 | 7,260496187 | 7,303780748 | 7,765998774 | 8,511752654 | PCP007277 | XM_009348038 |
| PCP007278 | 8,173277373 | 8,189824559 | 8,290018847 | 8,013071384 | PCP007278 | XM_009347081 |
| PCP007282 | 7,807354922 | 7,961912672 | 7,956114749 | 7,626950122 |           |              |
| PCP007292 | 8,274587815 | 8,348728154 | 8,949330653 | 9,296916207 |           |              |
| PCP007296 | 7,886733033 | 7,886733033 | 7,979167931 | 7,665335917 | PCP007296 | XM_009374328 |
| PCP007305 | 6,857980995 | 7,241554209 | 7,273049587 | 7,730164413 | PCP007305 | XM_009374344 |
| PCP007310 | 7,653418353 | 7,868328714 | 7,62935662  | 7,327956767 | PCP007310 | XM_009341430 |
| PCP007327 | 7,667679281 | 7,587440004 | 7,400879436 | 6,841344192 | PCP007327 | XM_009372196 |
| PCP007333 | 8,144658243 | 8,060695932 | 8,014968933 | 8,011227255 |           |              |
| PCP007336 | 7,743689989 | 7,54689446  | 7,562242424 | 7,470292816 | PCP007336 | XM_018644293 |
| PCP007338 | 8,136119594 | 7,900866808 | 7,886733033 | 7,6794801   | PCP007338 | XM_018644805 |
| PCP007345 | 7,46760555  | 7,564759219 | 7,660566438 | 8,146339557 |           |              |
| PCP007379 | 6,832890014 | 7,515699838 | 7,303780748 | 7,098032083 | PCP007379 | XM_008381355 |
| PCP007380 | 7,206232954 | 7,146390476 | 7,403693786 | 7,77036657  | PCP007380 | XM_009380873 |
| PCP007381 | 7,163196797 | 6,845490051 | 6,934634441 | 7,491853096 | PCP007381 | XM_018644153 |
| PCP007382 | 7,725673    | 8,241601875 | 8,13442632  | 8,178266468 |           |              |
| PCP007390 | 7,884658968 | 7,752681699 | 7,837123296 | 7,651051691 | PCP007390 | XM_008340838 |
| PCP007398 | 7,244791942 | 7,282347131 | 7,279192684 | 7,813781191 | PCP007398 | XM_009349847 |
| PCP007412 | 8,481113232 | 8,60855054  | 8,533991546 | 8,380807357 | PCP007412 | XM_009370201 |
| PCP007415 | 7,257387843 | 7,225641265 | 7,531381461 | 7,87036472  |           |              |

|           |             |             |             |             |           |              |
|-----------|-------------|-------------|-------------|-------------|-----------|--------------|
| PCP007420 | 7,209453366 | 7,225641265 | 7,212666605 | 7,772611496 | PCP007420 | XM_018642842 |
| PCP007439 | 8,001858526 | 8,091012169 | 8,169925001 | 7,990557838 | PCP007439 | XM_017324307 |
| PCP007455 | 7,541716163 | 7,510408147 | 7,950293432 | 8,41079052  | PCP007455 | XM_008340006 |
| PCP007464 | 7,723353774 | 7,794415866 | 8,018645301 | 8,975360779 |           |              |
| PCP007472 | 8,009380767 | 8,055282436 | 8,406545173 | 9,208648936 | PCP007472 | XM_008340197 |
| PCP007476 | 7,040782866 | 7,330916878 | 7,730164413 | 8,053491515 | PCP007476 | XM_009351553 |
| PCP007488 | 7,672425342 | 7,855927425 | 7,772611496 | 7,489205728 | PCP007488 | XM_009341709 |
| PCP007495 | 7,294620749 | 7,473056289 | 7,375039431 | 7,910912508 | PCP007495 | XM_009376575 |
| PCP007498 | 8,341318667 | 8,188193194 | 8,315919398 | 9,184057088 | PCP007498 | XM_008342183 |
| PCP007508 | 7,783522135 | 8,055282436 | 7,321928095 | 7,386552314 | PCP007508 | XM_009360013 |
| PCP007512 | 7,212666605 | 7,196430001 | 6,807354922 | 6,99242856  | PCP007512 | XM_009352463 |
| PCP007524 | 7,938579853 | 8,046196362 | 8,315919398 | 8,163247124 | PCP007524 | XM_018649941 |
| PCP007525 | 7,750405521 | 8,129283017 | 8,620842965 | 9,01402047  | PCP007525 | XR_668727    |
| PCP007526 | 7,354646096 | 7,173227395 | 7,886733033 | 7,988684687 | PCP007526 | XM_009369777 |
| PCP007534 | 6,619559738 | 6,785681319 | 7,098032083 | 7,718841075 | PCP007534 | XM_009354650 |
| PCP007542 | 7,333870928 | 7,567347696 | 7,572359168 | 7,380850638 | PCP007542 | XR_530190    |
| PCP007554 | 7,111970261 | 7,594921715 | 7,809478757 | 8,357552005 | PCP007554 | XM_018649812 |
| PCP007564 | 8,037107627 | 8,115459877 | 8,031604721 | 7,577428828 | PCP007564 | XM_009369666 |
| PCP007566 | 7,960001932 | 7,481153605 | 7,564759219 | 6,837060204 | PCP007566 | XM_009369676 |
| PCP007570 | 7,837123296 | 8,144658243 | 8,357552005 | 8,619596417 | PCP007570 | XM_018652392 |
| PCP007575 | 7,932687205 | 8,306836389 | 8,266786541 | 8,45532722  | PCP007575 | XM_009380594 |
| PCP007578 | 7,826548487 | 8,158205728 | 8,137862104 | 7,765998774 | PCP007578 | XM_009339434 |
| PCP007585 | 7,46760555  | 7,71651083  | 7,826548487 | 8,087462841 |           |              |
| PCP007592 | 8,08571145  | 8,091012169 | 8,136119594 | 8,539158811 | PCP007592 | XM_008371011 |
| PCP007599 | 8,214319121 | 8,291539098 | 8,194756854 | 8,122413888 | PCP007599 | XM_009373954 |
| PCP007609 | 7,456724026 | 7,451211112 | 7,46760555  | 7,193081765 |           |              |
| PCP007611 | 7,754887502 | 7,662988741 | 8,21106088  | 7,741466986 | PCP007611 | XM_018646928 |
| PCP007613 | 7,333870928 | 7,375039431 | 7,251056285 | 6,327866971 | PCP007613 | XM_009363917 |
| PCP007624 | 8,478446064 | 8,260543232 | 8,452570726 | 8,407989993 |           |              |
| PCP007629 | 8,026080745 | 7,934693407 | 7,785746699 | 7,781359714 | PCP007629 | XM_009347088 |
| PCP007637 | 7,238404739 | 7,622051819 | 7,98111057  | 8,451211112 | PCP007637 | XM_009348216 |
| PCP007656 | 7,826548487 | 7,862141394 | 7,95419631  | 8,400879436 | PCP007656 | XM_008394018 |
| PCP007660 | 8,144658243 | 8,379378367 | 8,46760555  | 9,036173613 |           |              |
| PCP007662 | 8,181549844 | 8,341318667 | 8,426264755 | 8,667714757 | PCP007662 | XM_009347174 |
| PCP007666 | 8,74819285  | 8,736976865 | 8,885696373 | 8,732438807 | PCP007666 | XM_009338368 |
| PCP007707 | 8,574896225 | 8,470333494 | 8,584962501 | 8,423452115 |           |              |
| PCP007719 | 8,3994702   | 8,048050866 | 8,247927513 | 8,409390936 | PCP007719 | NM_001328974 |
| PCP007724 | 7,977279923 | 7,653418353 | 7,792269724 | 7,768184325 |           |              |
| PCP007729 | 7,044394119 | 7,14974712  | 6,988684687 | 6,807354922 | PCP007729 | XM_018645307 |
| PCP007730 | 8,535275377 | 8,649866903 | 8,68183575  | 9,023283079 | PCP007730 | XM_018644911 |
| PCP007742 | 7,845490051 | 7,702726796 | 7,594921715 | 7,215969746 | PCP007742 | XM_009368366 |
| PCP007777 | 7,634230226 | 7,567347696 | 7,497213158 | 7,17990909  | PCP007777 | XM_009378370 |
| PCP007797 | 7,139551352 | 8,071462363 | 7,587440004 | 7,554588852 | PCP007797 | XM_009359008 |
| PCP007868 | 8,342830273 | 8,108524457 | 7,768184325 | 7,375039431 | PCP007868 | XM_018643374 |
| PCP007886 | 8,653454181 | 8,918863237 | 8,724513853 | 8,654636029 | PCP007886 | XM_009371586 |
| PCP007951 | 7,303780748 | 7,541716163 | 7,592457037 | 7,932687205 | PCP007951 | XM_018643059 |

|           |             |             |             |             |           |              |
|-----------|-------------|-------------|-------------|-------------|-----------|--------------|
| PCP007999 | 8,578674597 | 8,537878433 | 8,363390129 | 8,225593068 | PCP007999 | XM_009362647 |
| PCP008037 | 7,658211483 | 7,607330314 | 7,523561956 | 7,263691734 |           |              |
| PCP008072 | 6,882643049 | 7,186559982 | 7,156538193 | 7,579919292 | PCP008072 | XM_017330193 |
| PCP008107 | 6,894817763 | 6,902917719 | 7,132679654 | 6,81159947  | PCP008107 | XM_017333913 |
| PCP008121 | 6,926829678 | 6,820178962 | 6,781359714 | 7,743689989 | PCP008121 | XM_007210528 |
| PCP008146 | 8,057071136 | 7,803033252 | 7,77036657  | 7,244791942 | PCP008146 | XR_526770    |
| PCP008179 | 6,357552005 | 6,464831606 | 7,541716163 | 7,843418611 |           |              |
| PCP008184 | 7,044394119 | 7,111970261 | 7,169925001 | 7,695785075 | PCP008184 | XM_009356845 |
| PCP008188 | 7,257387843 | 7,166615031 | 7,442943496 | 7,824449651 | PCP008188 | XM_009356840 |
| PCP008208 | 8,204571144 | 7,794415866 | 7,648681141 | 7,475733431 |           |              |
| PCP008223 | 7,111970261 | 7,115511897 | 7,63175911  | 8,330916878 |           |              |
| PCP008227 | 7,412188747 | 7,366322214 | 7,660566438 | 7,383704292 |           |              |
| PCP008231 | 8,186510462 | 7,77036657  | 7,779194046 | 7,798763389 | PCP008231 | XM_009338531 |
| PCP008236 | 8,317412614 | 8,544307635 | 8,927777962 | 8,962896005 |           |              |
| PCP008240 | 8,277659361 | 8,403736386 | 8,385129006 | 8,321928095 |           |              |
| PCP008252 | 8,265239967 | 8,156487632 | 8,127581695 | 8,122413888 | PCP008252 | XM_009363946 |
| PCP008255 | 8,363390129 | 8,087462841 | 7,969645536 | 8,159871337 | PCP008255 | XM_009363949 |
| PCP008263 | 8,144658243 | 7,998139076 | 8,06786455  | 7,714245518 | PCP008263 | XM_009363962 |
| PCP008274 | 7,369204723 | 7,453929061 | 7,77036657  | 8,645045922 | PCP008274 | XM_009363978 |
| PCP008277 | 7,723353774 | 7,318949464 | 7,309885571 | 7,22881869  | PCP008277 | XM_008373989 |
| PCP008290 | 8,117227504 | 8,392317423 | 8,567309664 | 8,532667615 | PCP008290 | XM_008361898 |
| PCP008306 | 8,263644792 | 7,938579853 | 7,695785075 | 7,22881869  |           |              |
| PCP008311 | 7,609769734 | 7,71651083  | 8,158205728 | 8,87036472  |           |              |
| PCP008317 | 7,448488033 | 7,572359168 | 7,684187561 | 8,171577143 |           |              |
| PCP008328 | 6,785681319 | 6,634157606 | 6,700439718 | 8,548166865 | PCP008328 | XM_008391642 |
| PCP008332 | 7,464913269 | 7,665335917 | 7,739240553 | 8,024197765 |           |              |
| PCP008336 | 7,176621973 | 7,238404739 | 7,587440004 | 7,950293432 | PCP008336 | XM_009344880 |
| PCP008347 | 6,491853096 | 6,837060204 | 7,08395793  | 7,333870928 | PCP008347 | XM_009344855 |
| PCP008350 | 7,375039431 | 7,609769734 | 8,073231127 | 9,240791332 | PCP008350 | XM_009344852 |
| PCP008361 | 7,988684687 | 7,779194046 | 7,845490051 | 7,705079392 | PCP008361 | XM_009356613 |
| PCP008363 | 8,14974712  | 8,139551352 | 8,373604714 | 8,918863237 |           |              |
| PCP008374 | 8,130982335 | 7,918863237 | 8,176572111 | 8,511752654 | PCP008374 | XM_018647159 |
| PCP008378 | 7,839203788 | 7,820178962 | 7,695785075 | 7,426264755 |           |              |
| PCP008379 | 7,864186145 | 7,745976779 | 7,776959347 | 7,6794801   | PCP008379 | XM_009356583 |
| PCP008393 | 8,742578916 | 8,21916852  | 7,900866808 | 7,324900589 | PCP008393 | XM_018643553 |
| PCP008399 | 7,28845085  | 7,46760555  | 7,584962501 | 7,942514505 | PCP008399 | XM_009340928 |
| PCP008405 | 6,653490009 | 6,845490051 | 6,926829678 | 7,360452072 | PCP008405 | XM_009335868 |
| PCP008429 | 8,714245518 | 8,760453835 | 8,762647796 | 8,630558365 | PCP008429 | XM_009335815 |
| PCP008435 | 7,776959347 | 7,765998774 | 7,811663685 | 7,475733431 | PCP008435 | XM_009335808 |
| PCP008439 | 7,426264755 | 7,105070402 | 7,369204723 | 7,153095972 | PCP008439 | XM_009335796 |
| PCP008451 | 7,481153605 | 7,069637728 | 7,30679083  | 7,176621973 | PCP008451 | XM_009368882 |
| PCP008453 | 8,725638921 | 8,713111526 | 8,739206792 | 8,62935662  | PCP008453 | XM_009343236 |
| PCP008470 | 7,63175911  | 7,718841075 | 7,759355602 | 8,77807713  | PCP008470 | XM_009336863 |
| PCP008483 | 8,634193917 | 8,639051236 | 8,753785022 | 9,282323962 | PCP008483 | XM_009336884 |
| PCP008484 | 7,90285744  | 7,515699838 | 7,42063398  | 6,50779464  | PCP008484 | XM_009354790 |
| PCP008486 | 8,853839746 | 8,438791853 | 8,356099782 | 7,934693407 |           |              |



|           |             |             |             |             |           |              |
|-----------|-------------|-------------|-------------|-------------|-----------|--------------|
| PCP008489 | 8,485145023 | 8,544307635 | 8,618385502 | 8,501160452 | PCP008489 | XM_009354806 |
| PCP008492 | 6,898812977 | 7,087462841 | 6,785681319 | 6,718772592 | PCP008492 | XM_009354816 |
| PCP008521 | 8,279239123 | 8,631795481 | 8,779161208 | 9,031577154 | PCP008521 | XM_018645290 |
| PCP008524 | 8,215921225 | 8,382278171 | 8,359002767 | 8,094500005 |           |              |
| PCP008525 | 7,136170875 | 7,033423002 | 7,285402219 | 7,805227956 | PCP008525 | XM_017326474 |
| PCP008532 | 7,183188734 | 7,486473046 | 7,559721231 | 8,013071384 |           |              |
| PCP008537 | 8,130982335 | 7,884658968 | 7,757089938 | 7,721099189 |           |              |
| PCP008540 | 8,740354199 | 8,597419437 | 8,742578916 | 8,531381461 |           |              |
| PCP008550 | 8,191454081 | 8,038918989 | 8,091012169 | 8,044394119 | PCP008550 | XM_009339396 |
| PCP008552 | 6,946379968 | 6,918863237 | 6,946379968 | 7,453929061 | PCP008552 | XM_009339391 |
| PCP008570 | 6,491853096 | 6,491853096 | 7,051698368 | 7,536596918 |           |              |
| PCP008579 | 8,347267018 | 8,60855054  | 8,69115027  | 9,395169935 | PCP008579 | XM_009360977 |
| PCP008581 | 8,285402219 | 7,973439079 | 8,122413888 | 8,092757141 | PCP008581 | XR_667583    |
| PCP008593 | 7,241554209 | 7,058857621 | 7,094552786 | 6,47037417  |           |              |
| PCP008595 | 8,513056419 | 8,43325159  | 8,431831861 | 8,207844058 | PCP008595 | XM_009361007 |
| PCP008599 | 6,777025123 | 6,984931073 | 6,965784285 | 8,56350137  | PCP008599 | XM_009368122 |
| PCP008601 | 8,309840108 | 8,016808288 | 8,130982335 | 8,188193194 |           |              |
| PCP008606 | 7,330916878 | 7,406587689 | 7,562242424 | 8,057071136 | PCP008606 | XM_008369883 |
| PCP008610 | 7,597456684 | 7,614709844 | 6,996275749 | 7,318949464 |           |              |
| PCP008611 | 8,06608919  | 7,908872939 | 7,754887502 | 7,732472726 | PCP008611 | NM_001293880 |
| PCP008617 | 6,988684687 | 6,87036472  | 7,523561956 | 8,980139578 | PCP008617 | NM_001319807 |
| PCP008622 | 7,483815777 | 7,483815777 | 7,456724026 | 7,330916878 |           |              |
| PCP008629 | 8,031604721 | 8,816983623 | 7,950293432 | 7,244791942 | PCP008629 | NM_001319813 |
| PCP008639 | 8,698114274 | 8,882643049 | 8,692336525 | 8,909893084 | PCP008639 | XM_009374580 |
| PCP008645 | 7,510408147 | 7,022367813 | 7,037052702 | 6,718772592 | PCP008645 | XM_018643538 |
| PCP008647 | 8,48651327  | 8,528766645 | 8,653454181 | 8,459431619 | PCP008647 | XM_009340820 |
| PCP008649 | 8,04072808  | 8,422064766 | 8,471675214 | 9,034331283 | PCP008649 | XM_008348559 |
| PCP008650 | 7,486473046 | 8,129283017 | 8,13442632  | 8,440163216 | PCP008650 | XM_008348559 |
| PCP008655 | 7,908872939 | 7,61227877  | 6,977279923 | 6,589913261 | PCP008655 | XM_008376392 |
| PCP008679 | 8,743723645 | 8,72904287  | 8,780277286 | 8,631795481 | PCP008679 | XM_008373783 |
| PCP008704 | 7,518299077 | 7,189824559 | 7,247927513 | 7,321928095 | PCP008704 | XM_018648461 |
| PCP008707 | 8,357552005 | 8,154818109 | 8,037107627 | 8,191454081 | PCP008707 | XM_008228891 |
| PCP008708 | 8,452570726 | 8,027905997 | 8,158205728 | 8,154818109 | PCP008708 | XM_009348498 |
| PCP008711 | 8,773699688 | 8,649866903 | 8,230404783 | 7,30679083  | PCP008711 | XM_009363630 |
| PCP008746 | 7,965784285 | 8,014968933 | 7,878541438 | 8,434628228 |           |              |
| PCP008762 | 7,08395793  | 7,142923928 | 7,225641265 | 7,688809791 | PCP008762 | XM_009361351 |
| PCP008763 | 8,653454181 | 9,039823818 | 8,830768706 | 8,606109055 | PCP008763 | XM_009348952 |
| PCP008779 | 8,360495967 | 8,370687407 | 8,341318667 | 8,201290788 | PCP008779 | XM_009359079 |
| PCP008790 | 7,977279923 | 7,986809101 | 7,988684687 | 8,482485305 | PCP008790 | XM_009367212 |
| PCP008796 | 8,005624549 | 7,510408147 | 7,572359168 | 7,423494135 | PCP008796 | XM_008350552 |
| PCP008798 | 7,763743526 | 7,781359714 | 8,069691427 | 9,599912842 | PCP008798 | XM_009338220 |
| PCP008806 | 7,805227956 | 7,781359714 | 7,832890014 | 7,658211483 | PCP008806 | XM_018648114 |
| PCP008808 | 6,695854658 | 6,97349648  | 7,029784146 | 7,377904593 | PCP008808 | XM_009361039 |
| PCP008813 | 7,914863459 | 7,851749041 | 7,894817763 | 7,743689989 | PCP008813 | XM_009361025 |
| PCP008815 | 7,950293432 | 7,641473777 | 7,839203788 | 7,711976642 | PCP008815 | XM_009361028 |
| PCP008835 | 7,389480771 | 7,63175911  | 7,824449651 | 8,336863563 | PCP008835 | XM_009362322 |

|           |             |             |             |             |           |              |
|-----------|-------------|-------------|-------------|-------------|-----------|--------------|
| PCP008839 | 7,63175911  | 7,139551352 | 7,125878364 | 6,886672074 | PCP008839 | XM_009362442 |
| PCP008865 | 8,236827423 | 8,293103743 | 8,54689446  | 8,791162889 | PCP008865 | XM_009355631 |
| PCP008866 | 7,757089938 | 7,50517639  | 7,843418611 | 8,06608919  | PCP008866 | XM_009355627 |
| PCP008872 | 8,456682963 | 8,21916852  | 8,752648252 | 7,912889336 | PCP008872 | XM_009355621 |
| PCP008879 | 7,372168569 | 8,204571144 | 8,020535537 | 10,00562455 |           |              |
| PCP008881 | 7,718841075 | 7,990557838 | 8,101555535 | 8,330916878 |           |              |
| PCP008921 | 7,77478706  | 7,956114749 | 8,485145023 | 9,283088353 |           |              |
| PCP008922 | 8,626913629 | 8,732438807 | 8,447083226 | 8,601139355 | PCP008922 | XM_009380252 |
| PCP008951 | 8,661778098 | 8,353146825 | 8,527477006 | 8,812722827 | PCP008951 | XM_009346688 |
| PCP008960 | 6,709704193 | 6,942514505 | 6,930737338 | 7,684187561 | PCP008960 | XM_009344473 |
| PCP008973 | 8,029728942 | 7,71651083  | 7,470292816 | 7,132679654 | PCP008973 | XM_008343267 |
| PCP008988 | 7,003714662 | 6,878602742 | 7,069637728 | 7,528805707 | PCP008988 | XM_009361161 |
| PCP008990 | 8,060695932 | 8,049848549 | 8,064311643 | 8,588714636 | PCP008990 | XM_018648139 |
| PCP008992 | 7,366322214 | 7,520972191 | 7,541716163 | 8,163247124 |           |              |
| PCP009012 | 7,415065677 | 7,380850638 | 7,386552314 | 6,667750232 |           |              |
| PCP009014 | 8,266786541 | 8,125826717 | 8,227230852 | 8,611024797 | PCP009014 | XM_009344910 |
| PCP009023 | 6,886672074 | 6,828707735 | 6,958030641 | 7,772611496 | PCP009023 | XM_008342278 |
| PCP009040 | 8,125826717 | 8,227230852 | 8,39373366  | 8,171577143 | PCP009040 | XM_009375746 |
| PCP009044 | 7,339850003 | 7,101503009 | 7,440204752 | 6,741466986 | PCP009044 | XM_009375752 |
| PCP009045 | 7,183188734 | 7,014913158 | 7,196430001 | 6,47037417  | PCP009045 | XM_009375754 |
| PCP009064 | 8,049848549 | 8,220765252 | 7,752681699 | 7,772611496 | PCP009064 | NM_001302278 |
| PCP009067 | 7,681800619 | 7,567347696 | 7,569855608 | 7,415065677 | PCP009067 | XR_001951378 |
| PCP009076 | 8,602401945 | 8,367764188 | 8,398016818 | 8,370687407 | PCP009076 | XM_017333814 |
| PCP009080 | 8,073231127 | 7,922851957 | 8,239980333 | 8,464872438 | PCP009080 | XM_008349114 |
| PCP009089 | 7,380850638 | 7,342785837 | 7,451211112 | 6,984931073 | PCP009089 | XM_009348734 |
| PCP009099 | 8,429071922 | 8,075051225 | 8,283875484 | 8,154818109 | PCP009099 | XR_668149    |
| PCP009100 | 8,130982335 | 8,181549844 | 8,501160452 | 8,707359132 |           |              |
| PCP009105 | 7,475733431 | 7,589988142 | 7,526147081 | 8,007475849 |           |              |
| PCP009114 | 8,247927513 | 8,290018847 | 8,35169016  | 8,797661526 | PCP009114 | XM_008368462 |
| PCP009128 | 8,572397068 | 8,257387843 | 8,58747751  | 8,17990909  | PCP009128 | XM_018651364 |
| PCP009130 | 8,120652609 | 8,236827423 | 8,680640826 | 8,70158371  | PCP009130 | XM_009375863 |
| PCP009164 | 8,388017285 | 8,448446735 | 8,733591606 | 9,036173613 |           |              |
| PCP009168 | 8,813781191 | 8,642665475 | 8,614709844 | 8,745943176 | PCP009168 | XM_009378026 |
| PCP009200 | 7,339850003 | 7,554588852 | 7,73470962  | 7,922851957 | PCP009200 | XM_009364558 |
| PCP009266 | 6,95419631  | 6,266786541 | 6,934634441 | 7,312882955 |           |              |
| PCP009269 | 7,434628228 | 7,309885571 | 7,544346278 | 7,924812504 |           |              |
| PCP009276 | 8,191454081 | 8,055282436 | 8,39373366  | 9,19802752  | PCP009276 | XM_009340422 |
| PCP009292 | 8,612241904 | 8,458078458 | 8,485145023 | 8,875503635 |           |              |
| PCP009303 | 7,166615031 | 6,958030641 | 7,383704292 | 7,677155841 | PCP009303 | XM_009338247 |
| PCP009318 | 7,783522135 | 7,754887502 | 7,807354922 | 7,533952624 | PCP009318 | XM_008373639 |
| PCP009325 | 7,098032083 | 7,186559982 | 7,872397856 | 8,299208018 | PCP009325 | XM_009351731 |
| PCP009330 | 8,426264755 | 8,297695831 | 8,475733431 | 8,332394659 | PCP009330 | XM_009349554 |
| PCP009332 | 7,375039431 | 7,111970261 | 7,50517639  | 8,011227255 | PCP009332 | XM_009358875 |
| PCP009343 | 8,589950702 | 8,354602022 | 8,423452115 | 8,431831861 | PCP009343 | XM_009343488 |
| PCP009356 | 7,037052702 | 7,222360218 | 7,464913269 | 7,686500527 | PCP009356 | XM_009361448 |
| PCP009369 | 7,291585141 | 7,693486957 | 7,90285744  | 8,257387843 |           |              |

|           |             |             |             |             |           |              |
|-----------|-------------|-------------|-------------|-------------|-----------|--------------|
| PCP009370 | 7,574934058 | 7,87036472  | 7,824449651 | 8,412231097 | PCP009370 | XM_009373971 |
| PCP009377 | 7,330916878 | 7,589988142 | 7,339850003 | 6,639087423 |           |              |
| PCP009392 | 8,520932916 | 8,288496992 | 8,341318667 | 8,055282436 | PCP009392 | XM_009343278 |
| PCP009400 | 9,186535222 | 7,739240553 | 6,695854658 | 7,984874125 | PCP009400 | XM_007226460 |
| PCP009401 | 8,919846558 | 7,714245518 | 7,309885571 | 8,552015799 | PCP009401 | XM_009341425 |
| PCP009402 | 8,241601875 | 8,19313106  | 8,087462841 | 8,06608919  |           |              |
| PCP009457 | 7,297649983 | 7,176621973 | 7,50247382  | 7,90285744  | PCP009457 | XR_001952562 |
| PCP009464 | 6,695854658 | 6,820178962 | 6,95419631  | 7,8008999   |           |              |
| PCP009481 | 7,330916878 | 6,981053471 | 6,886672074 | 7,459431619 | PCP009481 | XM_008341786 |
| PCP009484 | 7,336908182 | 7,604886762 | 7,634230226 | 7,475733431 | PCP009484 | XM_021967594 |
| PCP009494 | 7,383704292 | 7,300764373 | 7,572359168 | 8,096293483 | PCP009494 | XM_009344778 |
| PCP009518 | 7,360452072 | 7,470292816 | 7,225641265 | 7,193081765 |           |              |
| PCP009532 | 8,74819285  | 8,660602089 | 8,522267655 | 8,506486109 | PCP009532 | XM_009367546 |
| PCP009561 | 7,30679083  | 6,705010253 | 7,849686575 | 7,309885571 | PCP009561 | XM_008377173 |
| PCP009562 | 8,626913629 | 8,198052084 | 8,490530019 | 8,32494558  | PCP009562 | XM_018644783 |
| PCP009568 | 6,60481265  | 6,759289016 | 6,977279923 | 7,619633096 | PCP009568 | XM_009359255 |
| PCP009587 | 7,209453366 | 7,209453366 | 7,193081765 | 7,918863237 | PCP009587 | XM_008390293 |
| PCP009594 | 6,564835417 | 6,594996337 | 7,153095972 | 7,54689446  | PCP009594 | XM_009362026 |
| PCP009610 | 6,918863237 | 7,090959258 | 7,260496187 | 7,518299077 | PCP009610 | XM_008387276 |
| PCP009612 | 3,700439718 | 5,700439718 | 7,494495616 | 13,51545346 | PCP009612 | NM_001302321 |
| PCP009615 | 8,695819867 | 8,523561956 | 8,459431619 | 8,622051819 | PCP009615 | XM_009362416 |
| PCP009702 | 6,464831606 | 7,21916852  | 7,209453366 | 6,81159947  |           |              |
| PCP009707 | 7,007531912 | 6,958030641 | 7,826548487 | 8,348728154 | PCP009707 | XM_009358413 |
| PCP009721 | 6,639087423 | 6,930737338 | 7,094552786 | 8,033423002 |           |              |
| PCP009727 | 8,875503635 | 8,434628228 | 8,19313106  | 8,202956379 | PCP009727 | XM_009358601 |
| PCP009746 | 7,212666605 | 7,199672345 | 7,437377568 | 7,105070402 | PCP009746 | XM_009358928 |
| PCP009754 | 7,235248379 | 7,269874722 | 6,878602742 | 6,820178962 | PCP009754 | XM_009359050 |
| PCP009773 | 7,998139076 | 8,049848549 | 8,332394659 | 8,509101985 | PCP009773 | XM_009359213 |
| PCP009781 | 6,303780748 | 6,50779464  | 7,058857621 | 8,024197765 |           |              |
| PCP009786 | 7,478405614 | 6,579994693 | 7,549438149 | 6,375039431 | PCP009786 | XM_009360622 |
| PCP009792 | 6,695854658 | 6,857980995 | 7,118941073 | 7,377904593 | PCP009792 | XM_009359413 |
| PCP009798 | 8,285402219 | 8,199672345 | 8,353146825 | 8,727920455 | PCP009798 | XM_009359457 |
| PCP009831 | 7,624466495 | 7,776959347 | 7,636624621 | 7,639015048 | PCP009831 | XM_009345697 |
| PCP009835 | 7,497213158 | 7,235248379 | 7,718841075 | 7,636624621 | PCP009835 | XM_009344877 |
| PCP009836 | 8,08390476  | 7,494495616 | 8,178266468 | 8,13442632  | PCP009836 | XM_009344798 |
| PCP009837 | 8,35169016  | 8,120652609 | 7,886733033 | 7,956114749 | PCP009837 | XM_009344446 |
| PCP009846 | 8,891783703 | 8,453970202 | 8,839203788 | 8,667714757 | PCP009846 | XM_009354801 |
| PCP009850 | 6,988684687 | 7,014913158 | 7,528805707 | 8,214319121 | PCP009850 | XM_009343193 |
| PCP009864 | 6,732404887 | 6,60481265  | 6,882643049 | 7,691185174 | PCP009864 | XM_009341364 |
| PCP009865 | 7,982993575 | 8,184875343 | 8,265239967 | 7,732472726 | PCP009865 | XM_008376597 |
| PCP009876 | 8,247927513 | 8,224001674 | 7,936637939 | 6,934634441 | PCP009876 | XM_009357786 |
| PCP009879 | 7,624466495 | 7,938579853 | 8,044394119 | 8,235200503 | PCP009879 | XM_009357782 |
| PCP009884 | 7,975389442 | 7,971543554 | 7,853808564 | 7,372168569 | PCP009884 | XM_009357772 |
| PCP009901 | 7,743689989 | 7,952275317 | 7,936637939 | 7,837123296 |           |              |
| PCP009906 | 8,273002948 | 8,19313106  | 8,026080745 | 7,658211483 | PCP009906 | XM_009357736 |
| PCP009912 | 8,395191361 | 8,33391564  | 8,74708524  | 9,447765141 | PCP009912 | XM_009357734 |

|           |             |             |             |             |           |              |
|-----------|-------------|-------------|-------------|-------------|-----------|--------------|
| PCP009918 | 7,294620749 | 7,437377568 | 7,589988142 | 7,285402219 | PCP009918 | XM_018647403 |
| PCP009931 | 7,564759219 | 7,597456684 | 7,574934058 | 8,044394119 |           |              |
| PCP009945 | 7,533952624 | 7,429030064 | 7,478405614 | 7,982993575 |           |              |
| PCP009952 | 6,86628983  | 6,97349648  | 7,300764373 | 7,554588852 | PCP009952 | XM_017333468 |
| PCP009961 | 7,705079392 | 7,395148508 | 6,820178962 | 6,50779464  | PCP009961 | XM_008377864 |
| PCP009971 | 7,798763389 | 7,333870928 | 7,582480735 | 7,003714662 | PCP009971 | NM_001293824 |
| PCP009995 | 6,886672074 | 7,363433935 | 7,076815597 | 7,202907418 |           |              |
| PCP010002 | 7,044394119 | 7,582480735 | 7,499845887 | 7,539158811 | PCP010002 | XM_008347883 |
| PCP010027 | 8,04072808  | 8,092757141 | 7,714245518 | 8,21106088  |           |              |
| PCP010031 | 8,062477937 | 8,243173983 | 8,33391564  | 7,958088658 | PCP010031 | XM_009365010 |
| PCP010043 | 7,528805707 | 7,757089938 | 7,681800619 | 7,572359168 | PCP010043 | XM_008376470 |
| PCP010055 | 7,453929061 | 7,118941073 | 7,026025399 | 6,609843592 |           |              |
| PCP010074 | 8,716545126 | 8,392317423 | 8,30833903  | 8,031604721 | PCP010074 | XM_009351730 |
| PCP010081 | 7,297649983 | 7,183188734 | 7,423494135 | 7,92677039  | PCP010081 | XM_008356440 |
| PCP010087 | 7,824449651 | 7,884658968 | 8,161535025 | 8,564797319 | PCP010087 | XM_009342465 |
| PCP010094 | 8,326429487 | 8,490530019 | 8,474395481 | 8,874458871 | PCP010094 | XR_001951834 |
| PCP010107 | 8,007475849 | 7,95419631  | 8,154818109 | 7,809478757 | PCP010107 | XM_009357459 |
| PCP010121 | 8,120652609 | 8           | 8,24474438  | 8,62450305  | PCP010121 | XM_018645141 |
| PCP010131 | 8,471675214 | 8,548166865 | 8,880593701 | 9,407267764 | PCP010131 | XM_009340847 |
| PCP010132 | 7,377904593 | 7,646234675 | 7,594921715 | 8,215921225 |           |              |
| PCP010134 | 7,369204723 | 6,594996337 | 7,136170875 | 7,768184325 | PCP010134 | XM_008389148 |
| PCP010135 | 8,402287298 | 8,464872438 | 8,453970202 | 7,431873638 | PCP010135 | XM_009346157 |
| PCP010156 | 8,110248388 | 7,940577883 | 7,824449651 | 7,417852515 |           |              |
| PCP010157 | 6,965784285 | 7,389480771 | 7,750405521 | 8,533991546 | PCP010157 | XM_009375997 |
| PCP010165 | 8,499845887 | 8,649866903 | 8,708497652 | 7,572359168 | PCP010165 | XM_009375993 |
| PCP010167 | 7,351645995 | 7,584962501 | 7,700439718 | 7,992485211 | PCP010167 | XM_009375986 |
| PCP010168 | 7,750405521 | 7,849686575 | 8,539158811 | 8,968666793 |           |              |
| PCP010174 | 7,864186145 | 8,014968933 | 8,161535025 | 7,906890596 |           |              |
| PCP010194 | 7,837123296 | 7,973439079 | 8,367764188 | 7,723353774 | PCP010194 | XM_009374105 |
| PCP010205 | 8,003770871 | 7,74819285  | 8,171577143 | 8,528766645 | PCP010205 | XM_009342413 |
| PCP010218 | 7,536596918 | 7,646234675 | 7,562242424 | 7,423494135 |           |              |
| PCP010232 | 8,151422517 | 8,400879436 | 8,442943496 | 8,238404739 |           |              |
| PCP010238 | 7,17990909  | 7,058857621 | 6,845490051 | 6,662917555 |           |              |
| PCP010245 | 8,291539098 | 8,451211112 | 8,474395481 | 8,807354922 | PCP010245 | XM_009376160 |
| PCP010251 | 7,111970261 | 7,153095972 | 7,539158811 | 7,942514505 | PCP010251 | XM_009376144 |
| PCP010261 | 8,598685286 | 8,423452115 | 8,306836389 | 8,020535537 |           |              |
| PCP010266 | 7,579919292 | 7,339850003 | 7,330916878 | 7,022367813 | PCP010266 | XM_009376170 |
| PCP010274 | 8,311385042 | 8,21916852  | 8,42488011  | 9,008428622 | PCP010274 | XM_009351257 |
| PCP010286 | 7,544346278 | 7,707359132 | 7,805227956 | 8,14974712  | PCP010286 | XM_009339593 |
| PCP010287 | 7,273049587 | 7,225641265 | 7,646234675 | 8,222408523 | PCP010287 | XM_018643260 |
| PCP010297 | 8,33391564  | 8,553322101 | 8,725638921 | 9,177419538 |           |              |
| PCP010299 | 8,431831861 | 8,568602197 | 8,660602089 | 8,894817763 | PCP010299 | XM_009351169 |
| PCP010311 | 7,336908182 | 8,247927513 | 8,482485305 | 8,659389441 |           |              |
| PCP010328 | 7,199672345 | 7,139551352 | 7,718841075 | 7,982993575 | PCP010328 | XM_009376393 |
| PCP010331 | 7,594921715 | 7,375039431 | 7,486473046 | 7,415065677 |           |              |
| PCP010333 | 6,99242856  | 7,225641265 | 7,176621973 | 7,768184325 |           |              |

|           |             |             |             |             |           |              |
|-----------|-------------|-------------|-------------|-------------|-----------|--------------|
| PCP010344 | 7,579919292 | 7,357552005 | 7,579919292 | 7,920829209 | PCP010344 | XM_018651517 |
| PCP010353 | 7,429030064 | 6,732404887 | 7,087462841 | 7,263691734 | PCP010353 | XM_009371421 |
| PCP010385 | 7,998139076 | 8,120652609 | 7,772611496 | 8,224001674 | PCP010385 | XM_009357033 |
| PCP010386 | 8,233619677 | 8,417852515 | 8,357552005 | 8,117227504 | PCP010386 | XM_009357040 |
| PCP010393 | 7,672425342 | 7,202907418 | 7,189824559 | 6,554588852 | PCP010393 | XM_009357051 |
| PCP010395 | 8,354602022 | 8,596189756 | 8,860062694 | 9,099794885 | PCP010395 | XM_008346038 |
| PCP010402 | 8,110248388 | 8,024197765 | 8,031604721 | 7,765998774 | PCP010402 | XM_008393671 |
| PCP010410 | 8,584962501 | 8,583722152 | 8,571107931 | 8,451211112 | PCP010410 | XR_524695    |
| PCP010413 | 7,513095909 | 7,163196797 | 7,383704292 | 7,090959258 | PCP010413 | XM_009369351 |
| PCP010414 | 7,389480771 | 7,073284692 | 7,50779464  | 8,332394659 |           |              |
| PCP010419 | 7,866228001 | 7,988684687 | 8,204571144 | 8,466260038 |           |              |
| PCP010422 | 7,375039431 | 7,453929061 | 7,624466495 | 8,064311643 | PCP010422 | XM_009369405 |
| PCP010424 | 8,21916852  | 8,108524457 | 8,262094845 | 8,06608919  | PCP010424 | XM_009369408 |
| PCP010433 | 8,184875343 | 7,942514505 | 8,215921225 | 8,602401945 | PCP010433 | XM_009374172 |
| PCP010439 | 7,667679281 | 6,62935662  | 6,942514505 | 7,609769734 | PCP010439 | XM_008366708 |
| PCP010442 | 7,572359168 | 7,63175911  | 7,559721231 | 7           |           |              |
| PCP010446 | 7,055282436 | 7,014913158 | 7,342785837 | 7,732472726 | PCP010446 | XM_008378914 |
| PCP010456 | 7,491853096 | 7,520972191 | 7,222360218 | 6,672425342 | PCP010456 | XM_008358909 |
| PCP010457 | 8,369248353 | 8,463524373 | 8,68183575  | 8,937609223 |           |              |
| PCP010473 | 8,859006685 | 8,645045922 | 8,660602089 | 8,482485305 | PCP010473 | XM_009351511 |
| PCP010540 | 6,667750232 | 6,950351762 | 7,026025399 | 7,614709844 | PCP010540 | XM_009337073 |
| PCP010551 | 8,623259662 | 8,442943496 | 8,678318438 | 8,976334992 |           |              |
| PCP010606 | 7,992485211 | 8,493174961 | 8,202956379 | 7,820178962 | PCP010606 | XM_018646178 |
| PCP010627 | 7,431873638 | 7,055282436 | 7,011227255 | 7,06608919  |           |              |
| PCP010628 | 6,196331634 | 6,475733431 | 6,922792504 | 8,057071136 | PCP010628 | XM_018642724 |
| PCP010630 | 7,977279923 | 7,910912508 | 7,667679281 | 8,168270966 |           |              |
| PCP010644 | 6,914923239 | 7,260496187 | 7,440204752 | 7,938579853 | PCP010644 | XM_008373724 |
| PCP010650 | 8,144658243 | 8,277659361 | 8,586201784 | 9,079484784 | PCP010650 | XM_008355007 |
| PCP010651 | 8,21757002  | 8,189824559 | 8,158205728 | 7,958088658 | PCP010651 | XM_008356815 |
| PCP010665 | 7,98111057  | 7,475733431 | 7,956114749 | 8,164906927 | PCP010665 | XM_009343748 |
| PCP010666 | 8,762647796 | 8,586201784 | 8,753785022 | 8,632995197 | PCP010666 | XM_009343726 |
| PCP010687 | 8,482485305 | 8,103287808 | 8,129283017 | 8,497173232 |           |              |
| PCP010712 | 8,606109055 | 8,599912842 | 8,845490051 | 9,064284694 |           |              |
| PCP010725 | 8,271463028 | 8,207844058 | 8,285402219 | 8,09976859  |           |              |
| PCP010762 | 8,631795481 | 8,623259662 | 8,752648252 | 9,24951645  |           |              |
| PCP010765 | 7,552054236 | 7,88062431  | 7,998139076 | 8,388017285 |           |              |
| PCP010770 | 8,721099189 | 8,357552005 | 8,660602089 | 8,84862294  | PCP010770 | XM_009350864 |
| PCP010805 | 8,651051691 | 8,523561956 | 8,620842965 | 9,080364533 |           |              |
| PCP010814 | 7,783522135 | 8,303780748 | 8,613494819 | 8,80196697  | PCP010814 | XM_009344328 |
| PCP010816 | 8,54689446  | 8,682994584 | 8,398016818 | 8,329437582 | PCP010816 | XR_530144    |
| PCP010819 | 7,451211112 | 7,952275317 | 8,049848549 | 7,736943052 | PCP010819 | XM_008349312 |
| PCP010822 | 7,324900589 | 7,655852677 | 7,499845887 | 7,266786541 | PCP010822 | XR_001953538 |
| PCP010826 | 8,031604721 | 8,215921225 | 8,798730993 | 8,744833837 | PCP010826 | XM_009352047 |
| PCP010839 | 8,463524373 | 8,62935662  | 8,827596761 | 9,080364533 |           |              |
| PCP010843 | 8,220765252 | 8,098032083 | 8,17990909  | 8,087462841 | PCP010843 | XM_017333412 |
| PCP010847 | 7,843418611 | 7,646234675 | 7,592457037 | 7,50779464  | PCP010847 | XM_008394498 |

|           |             |             |             |             |           |              |
|-----------|-------------|-------------|-------------|-------------|-----------|--------------|
| PCP010853 | 8,537878433 | 8,354602022 | 8,483815777 | 8,468949809 |           |              |
| PCP010880 | 8,106798463 | 7,952275317 | 8,001858526 | 8,523561956 | PCP010880 | XM_008340484 |
| PCP010897 | 8,022367813 | 7,992485211 | 8,139551352 | 8,541754876 | PCP010897 | XM_008383599 |
| PCP010905 | 8,716545126 | 8,632995197 | 8,593689902 | 8,591223118 |           |              |
| PCP010915 | 7,30679083  | 7,125878364 | 7,622051819 | 8,202956379 | PCP010915 | XM_009368117 |
| PCP010920 | 7,992485211 | 8,463524373 | 8,503825738 | 9,52160044  | PCP010920 | XM_009359644 |
| PCP010921 | 6,409390936 | 6,946379968 | 7,076815597 | 7,670089681 | PCP010921 | XM_009380101 |
| PCP010924 | 7,533952624 | 8,014968933 | 7,785746699 | 7,470292816 | PCP010924 | XM_009352440 |
| PCP010932 | 8,815927606 | 8,593689902 | 8,874458871 | 9,028817757 | PCP010932 | XM_009373100 |
| PCP010959 | 7,912889336 | 8,033423002 | 7,876516947 | 7,536596918 | PCP010959 | XM_009365138 |
| PCP010961 | 8,6794801   | 8,703903573 | 8,894817763 | 8,73470962  | PCP010961 | XM_009365143 |
| PCP010973 | 8,43325159  | 8,311385042 | 8,515699838 | 9,130132926 |           |              |
| PCP011002 | 8,606109055 | 8,268331458 | 8,405141463 | 8,532667615 | PCP011002 | XM_009338795 |
| PCP011016 | 6,965784285 | 6,922792504 | 7,17990909  | 7,63175911  | PCP011016 | XM_009378158 |
| PCP011018 | 7,714245518 | 7,971543554 | 8,209453366 | 8,453970202 | PCP011018 | XM_009335707 |
| PCP011038 | 7,658211483 | 7,743689989 | 7,942514505 | 7,375039431 |           |              |
| PCP011044 | 8,257387843 | 8,257387843 | 8,189824559 | 8,62935662  | PCP011044 | XM_008368995 |
| PCP011071 | 7,395148508 | 6,798698597 | 7,209453366 | 7,251056285 | PCP011071 | XM_009364325 |
| PCP011104 | 7,688809791 | 7,412188747 | 7,297649983 | 6,579994693 | PCP011104 | XM_009351445 |
| PCP011156 | 8,062477937 | 8,265239967 | 8,224001674 | 8,199672345 | PCP011156 | NM_001328944 |
| PCP011182 | 7,321928095 | 7,263691734 | 7,464913269 | 8,910882535 | PCP011182 | XR_529553    |
| PCP011201 | 7,818070833 | 7,721099189 | 7,818070833 | 7,691185174 | PCP011201 | XM_009343143 |
| PCP011241 | 8,291539098 | 7,820178962 | 7,807354922 | 7,518299077 | PCP011241 | XM_009370892 |
| PCP011263 | 7,398059585 | 7,122362117 | 7,417852515 | 8,073231127 | PCP011263 | XM_009374633 |
| PCP011271 | 7,732472726 | 7,464913269 | 7,478405614 | 7,46760555  | PCP011271 | XM_009376700 |
| PCP011280 | 7,898873426 | 7,658211483 | 8,08571145  | 8,45532722  | PCP011280 | XM_009379265 |
| PCP011284 | 7,826548487 | 7,813781191 | 7,928784831 | 7,714245518 | PCP011284 | XM_009365143 |
| PCP011318 | 8,344295908 | 8,41079052  | 8,762647796 | 9,315896762 | PCP011318 | XM_017323165 |
| PCP011322 | 7,691185174 | 8,176572111 | 8,35169016  | 8,464872438 | PCP011322 | XM_009370602 |
| PCP011333 | 7,732472726 | 7,681800619 | 7,914863459 | 8,369248353 |           |              |
| PCP011338 | 8,380807357 | 8,369248353 | 8,698114274 | 9,061587209 | PCP011338 | XM_009370578 |
| PCP011343 | 8,005624549 | 8,105018005 | 8,356099782 | 9,009352771 |           |              |
| PCP011356 | 8,560982378 | 8,592457037 | 8,655816908 | 9,017727086 | PCP011356 | XM_009370560 |
| PCP011360 | 7,440204752 | 7,721099189 | 7,878541438 | 8,153146652 | PCP011360 | XM_008339088 |
| PCP011366 | 8,188193194 | 8,112022407 | 7,898873426 | 8,297695831 | PCP011366 | XM_009370547 |
| PCP011368 | 8,148069774 | 8,398016818 | 8,441574774 | 8,740354199 | PCP011368 | XM_009370545 |
| PCP011381 | 7,88062431  | 8,347267018 | 7,528805707 | 7,688809791 | PCP011381 | XM_008363016 |
| PCP011397 | 8,196380818 | 8,422064766 | 8,649866903 | 9,119797095 | PCP011397 | XM_009354771 |
| PCP011408 | 6,853870927 | 6,890811455 | 7,101503009 | 7,489205728 | PCP011408 | XM_009344772 |
| PCP011417 | 7,462134139 | 7,238404739 | 7,003714662 | 6,574858391 |           |              |
| PCP011423 | 8,458078458 | 8,619596417 | 8,70276142  | 8,594959026 |           |              |
| PCP011437 | 7,169925001 | 7,462134139 | 7,515699838 | 7,759355602 |           |              |
| PCP011440 | 7,843418611 | 8,151422517 | 7,698149009 | 8,053491515 |           |              |
| PCP011447 | 8,603626345 | 8,596189756 | 8,773699688 | 9,049848549 | PCP011447 | XM_009368175 |
| PCP011448 | 7,080337882 | 7,303780748 | 7,336908182 | 7,809478757 | PCP011448 | XM_009380530 |
| PCP011452 | 7,044394119 | 7,478405614 | 7,691185174 | 7,853808564 |           |              |

|           |             |             |             |             |           |              |
|-----------|-------------|-------------|-------------|-------------|-----------|--------------|
| PCP011454 | 7,339850003 | 7,400879436 | 7,660566438 | 8,142974967 | PCP011454 | XM_018646845 |
| PCP011484 | 7,241554209 | 7,61227877  | 7,478405614 | 7,98111057  |           |              |
| PCP011485 | 7,636624621 | 7,592457037 | 7,375039431 | 7,238404739 | PCP011485 | XM_009355194 |
| PCP011513 | 7,798763389 | 7,080337882 | 6,832890014 | 6,392317423 | PCP011513 | XM_009343512 |
| PCP011516 | 7,303780748 | 7,333870928 | 7,707359132 | 8,071462363 |           |              |
| PCP011521 | 8,781359714 | 8,54303182  | 8,806291831 | 9,079484784 | PCP011521 | XM_008389102 |
| PCP011528 | 8,376472723 | 8,513056419 | 9,006550496 | 8,54303182  | PCP011528 | XM_009351613 |
| PCP011543 | 6,857980995 | 7,247927513 | 7,183188734 | 6,910852562 | PCP011543 | XM_008355082 |
| PCP011558 | 7,132679654 | 6,95419631  | 7,169925001 | 7,727920455 | PCP011558 | XM_009380008 |
| PCP011559 | 7,044394119 | 7,022367813 | 7,055282436 | 6,80309785  | PCP011559 | XM_009380007 |
| PCP011563 | 7,515699838 | 7,412188747 | 7,315874125 | 7,069637728 | PCP011563 | XM_018652270 |
| PCP011581 | 8,011227255 | 8,046196362 | 8,437419184 | 8,273002948 | PCP011581 | XM_009380037 |
| PCP011583 | 8,345760055 | 8,314379315 | 8,517000043 | 8,862110391 | PCP011583 | XM_009380039 |
| PCP011606 | 7,741466986 | 8,089212109 | 8,648645193 | 8,672425342 | PCP011606 | XM_018650169 |
| PCP011619 | 8,320439548 | 8,354602022 | 8,615923847 | 8,813781191 | PCP011619 | XM_017327154 |
| PCP011661 | 7,61227877  | 7,478405614 | 7,677155841 | 8,029728942 | PCP011661 | XR_665703    |
| PCP011678 | 7,007531912 | 7,648681141 | 8,249492747 | 8,479780264 | PCP011678 | XM_009346850 |
| PCP011683 | 6,662917555 | 6,375039431 | 6,624539604 | 10,1959873  | PCP011683 | XM_009357643 |
| PCP011684 | 8,098032083 | 8,173277373 | 8,373604714 | 8,937609223 | PCP011684 | XM_009357426 |
| PCP011715 | 8,027905997 | 7,843418611 | 7,916894583 | 7,609769734 | PCP011715 | XM_009350649 |
| PCP011716 | 7,813781191 | 7,944448531 | 7,994353437 | 8,46760555  | PCP011716 | XM_009349720 |
| PCP011725 | 6,902917719 | 6,599912842 | 6,874428132 | 7,254272787 | PCP011725 | XM_009361821 |
| PCP011729 | 6,828707735 | 7,183188734 | 7,282347131 | 8,058911723 | PCP011729 | XM_009361815 |
| PCP011734 | 7,431873638 | 7,260496187 | 6,902917719 | 6,459431619 | PCP011734 | XM_008395198 |
| PCP011739 | 8,658211483 | 8,588714636 | 8,714245518 | 9,046223651 | PCP011739 | XM_008395206 |
| PCP011745 | 7,510408147 | 7,864186145 | 8,238404739 | 8,631795481 |           |              |
| PCP011754 | 7,888743249 | 7,920829209 | 8,169925001 | 7,965784285 | PCP011754 | XM_009336099 |
| PCP011759 | 7,189824559 | 6,768184325 | 7,166615031 | 6,965784285 | PCP011759 | XM_009336108 |
| PCP011775 | 8,344295908 | 8,317412614 | 8,50779464  | 8,963849777 | PCP011775 | XM_018649333 |
| PCP011777 | 7,594921715 | 7,709635275 | 7,743689989 | 8,201290788 |           |              |
| PCP011782 | 7,61227877  | 7,667679281 | 8,022367813 | 8,483815777 | PCP011782 | XM_009366744 |
| PCP011798 | 8,564797319 | 8,753785022 | 8,727920455 | 9,265216522 |           |              |
| PCP011807 | 8,265239967 | 8,299208018 | 8,48651327  | 9,227206781 |           |              |
| PCP011812 | 8,207844058 | 8,051643995 | 8,163247124 | 8,60855054  |           |              |
| PCP011815 | 8,453970202 | 8,554588852 | 8,686500527 | 8,528766645 | PCP011815 | XM_008363424 |
| PCP011817 | 8,903881846 | 8,768184325 | 8,568602197 | 8,872428639 |           |              |
| PCP011818 | 7,705079392 | 7,641473777 | 8,057071136 | 8,199672345 | PCP011818 | XM_008363430 |
| PCP011825 | 8,442943496 | 8,120652609 | 9,100662339 | 8,018645301 | PCP011825 | XM_007209715 |
| PCP011842 | 7,6794801   | 7,834976616 | 8,436003553 | 8,096293483 | PCP011842 | XM_009370079 |
| PCP011848 | 8,013071384 | 8,299208018 | 8,440163216 | 8,409390936 | PCP011848 | NM_001294041 |
| PCP011851 | 7,348728154 | 7,564759219 | 7,539158811 | 7,312882955 | PCP011851 | XM_008385573 |
| PCP011855 | 7,691185174 | 7,159871337 | 7,282347131 | 7,06608919  | PCP011855 | XM_008385576 |
| PCP011858 | 7,50517639  | 6,569855608 | 7,260496187 | 6,845490051 | PCP011858 | XM_008385581 |
| PCP011867 | 8,087462841 | 7,944448531 | 7,624466495 | 7,599912842 | PCP011867 | XM_008351036 |
| PCP011893 | 7,754887502 | 8,003770871 | 8,32494558  | 9,041659152 | PCP011893 | XM_009345083 |
| PCP011905 | 7,273049587 | 7,520972191 | 7,437377568 | 8,053491515 |           |              |

|           |             |             |             |             |           |              |
|-----------|-------------|-------------|-------------|-------------|-----------|--------------|
| PCP011931 | 7,257387843 | 7           | 6,763809907 | 6,539158811 |           |              |
| PCP011935 | 8,395191361 | 8,44431092  | 8,612241904 | 8,342830273 | PCP011935 | XM_018650776 |
| PCP011946 | 6,853870927 | 7,159871337 | 7,273049587 | 7,843418611 |           |              |
| PCP011950 | 8,24474438  | 8,174925683 | 8,108524457 | 8,082149041 | PCP011950 | XM_008386854 |
| PCP011957 | 8,854868383 | 8,875503635 | 8,882643049 | 8,645045922 | PCP011957 | XM_009359954 |
| PCP011967 | 7,855927425 | 7,681800619 | 8,112022407 | 8,436003553 |           |              |
| PCP011976 | 8,477070141 | 8,581200582 | 8,723387907 | 9,094526396 |           |              |
| PCP011984 | 8,033423002 | 7,986809101 | 8,173277373 | 8,612241904 |           |              |
| PCP011985 | 7,653418353 | 7,714245518 | 8,442943496 | 8,447083226 | PCP011985 | XM_008354764 |
| PCP011994 | 7,339850003 | 7,437377568 | 7,417852515 | 8,06608919  | PCP011994 | XM_008363562 |
| PCP012009 | 7,579919292 | 8,186510462 | 8,431831861 | 8,827596761 |           |              |
| PCP012025 | 8,509101985 | 8,50779464  | 8,554588852 | 8,942514505 | PCP012025 | XM_009373764 |
| PCP012034 | 7,451211112 | 7,383704292 | 7,456724026 | 8,001858526 |           |              |
| PCP012049 | 6,969587981 | 6,54951516  | 7,018700931 | 7,321928095 | PCP012049 | XM_009369197 |
| PCP012054 | 8,62935662  | 8,703903573 | 8,72904287  | 8,628153873 | PCP012054 | XM_008393279 |
| PCP012055 | 7,851749041 | 7,011227255 | 7,473056289 | 7,146390476 | PCP012055 | XM_009369310 |
| PCP012098 | 8,791162889 | 8,531381461 | 8,692336525 | 8,713111526 | PCP012098 | XM_008380159 |
| PCP012114 | 6,491853096 | 7,115511897 | 7,333870928 | 8,144658243 | PCP012114 | XM_008382154 |
| PCP012139 | 7,695785075 | 7,930737338 | 8,191454081 | 8,735826768 | PCP012139 | XM_008355189 |
| PCP012143 | 7,380850638 | 7,569855608 | 7,247927513 | 6,714245518 | PCP012143 | XM_008343276 |
| PCP012153 | 8,623259662 | 8,536558066 | 8,604849706 | 8,427648072 | PCP012153 | XM_009371307 |
| PCP012163 | 6,837060204 | 6,015024705 | 9,274564521 | 8,257387843 |           |              |
| PCP012164 | 8,115459877 | 8,191454081 | 8,380807357 | 8,695819867 | PCP012164 | XM_008341444 |
| PCP012167 | 6,910852562 | 7,076815597 | 7,257387843 | 8,471675214 | PCP012167 | XM_008353052 |
| PCP012173 | 8,273002948 | 7,888743249 | 7,811663685 | 7,215969746 | PCP012173 | XR_001953538 |
| PCP012179 | 8,767091963 | 8,815927606 | 8,851749041 | 8,517000043 |           |              |
| PCP012200 | 7,282347131 | 7,146390476 | 7,453929061 | 8,503825738 | PCP012200 | XM_008381224 |
| PCP012203 | 7,254272787 | 6,969587981 | 7,348728154 | 7,61227877  |           |              |
| PCP012204 | 7,244791942 | 6,977279923 | 6,798698597 | 6,68187088  |           |              |
| PCP012218 | 8,759322309 | 8,894817763 | 8,978224236 | 8,625708843 | PCP012218 | XM_008340437 |
| PCP012220 | 7,651051691 | 8,092757141 | 7,992485211 | 8,022367813 | PCP012220 | XM_008221392 |
| PCP012228 | 8,315919398 | 8,487840034 | 8,41079052  | 8,347267018 |           |              |
| PCP012246 | 8,181549844 | 8,158205728 | 8,214319121 | 7,914863459 | PCP012246 | XM_008375646 |
| PCP012264 | 8,395191361 | 8,482485305 | 8,583722152 | 8,856954575 | PCP012264 | XM_008370756 |
| PCP012266 | 7,862141394 | 8,154818109 | 8,233619677 | 8,42488011  | PCP012266 | XM_009351129 |
| PCP012281 | 8,154818109 | 8,341318667 | 8,466260038 | 8,732438807 | PCP012281 | XM_008378806 |
| PCP012288 | 7,946438456 | 7,686500527 | 7,878541438 | 8,403736386 | PCP012288 | XM_009340280 |
| PCP012291 | 7,796558821 | 7,369204723 | 7,377904593 | 7,614709844 | PCP012291 | XM_009361637 |
| PCP012295 | 8,168270966 | 7,969645536 | 8,45532722  | 8,296136161 | PCP012295 | XM_008395566 |
| PCP012309 | 7,667679281 | 7,732472726 | 7,92677039  | 8,282300792 | PCP012309 | XM_009371563 |
| PCP012334 | 7,029784146 | 7,494495616 | 7,653418353 | 8,087462841 | PCP012334 | XM_008342024 |
| PCP012340 | 8,576181982 | 8,390899794 | 8,366322214 | 8,176572111 | PCP012340 | XM_008378102 |
| PCP012356 | 8,396604781 | 8,396604781 | 8,317412614 | 8,342830273 | PCP012356 | XM_009343894 |
| PCP012365 | 5,459431619 | 6,718772592 | 7,199672345 | 9,083931345 | PCP012365 | XM_009348862 |
| PCP012374 | 7,914863459 | 7,303780748 | 7,429030064 | 6,984931073 |           |              |
| PCP012392 | 7,956114749 | 8,427648072 | 8,236827423 | 8,493174961 | PCP012392 | XM_018643059 |



|           |             |             |             |             |           |              |
|-----------|-------------|-------------|-------------|-------------|-----------|--------------|
| PCP012403 | 8,087462841 | 7,996219247 | 7,653418353 | 7,294620749 | PCP012403 | XM_009345505 |
| PCP012406 | 7,6794801   | 7,489205728 | 7,602364826 | 7,303780748 | PCP012406 | XM_009347253 |
| PCP012414 | 8,760453835 | 8,445718428 | 8,359002767 | 7,930737338 |           |              |
| PCP012418 | 7,06608919  | 7,215969746 | 7,940577883 | 8,027905997 |           |              |
| PCP012439 | 8,41502341  | 8,096293483 | 7,95419631  | 7,641473777 | PCP012439 | XM_009377772 |
| PCP012445 | 8,318904285 | 8,311385042 | 8,029728942 | 8,363390129 |           |              |
| PCP012473 | 8,363390129 | 8,554588852 | 8,54689446  | 9,20537785  | PCP012473 | XM_009345077 |
| PCP012475 | 8,342830273 | 8,227230852 | 8,406545173 | 8,049848549 |           |              |
| PCP012505 | 7,990557838 | 8,339850003 | 9,052568051 | 9,348728154 |           |              |
| PCP012506 | 8,416459769 | 8,151422517 | 8,120652609 | 8,078577814 | PCP012506 | XM_008363326 |
| PCP012507 | 7,725673    | 7,960001932 | 7,888743249 | 7,448488033 |           |              |
| PCP012530 | 8,285402219 | 8,236827423 | 8,545620932 | 8,723387907 |           |              |
| PCP012537 | 7,607330314 | 7,639015048 | 7,691185174 | 8,144658243 | PCP012537 | XM_008366557 |
| PCP012551 | 7,375039431 | 7,783522135 | 8,207844058 | 8,586201784 | PCP012551 | XM_009370292 |
| PCP012564 | 7,624466495 | 7,569855608 | 7,552054236 | 7,456724026 |           |              |
| PCP012568 | 8,554588852 | 8,509101985 | 8,581200582 | 8,942514505 |           |              |
| PCP012575 | 7,855927425 | 7,473056289 | 7,372168569 | 7,235248379 | PCP012575 | XM_009365133 |
| PCP012585 | 7,153095972 | 7,142923928 | 7,273049587 | 7,946438456 | PCP012585 | XM_009366792 |
| PCP012600 | 8,807354922 | 8,552015799 | 8,97441459  | 8,979196518 | PCP012600 | XM_018645380 |
| PCP012644 | 7,348728154 | 7,462134139 | 7,386552314 | 7           | PCP012644 | XM_009381084 |
| PCP012653 | 7,494495616 | 7,069637728 | 7,46760555  | 7,260496187 | PCP012653 | XM_018646410 |
| PCP012682 | 7,499845887 | 7,520972191 | 7,62935662  | 8,026080745 | PCP012682 | XM_009379863 |
| PCP012688 | 7,961912672 | 8,113742166 | 8,092757141 | 7,71651083  | PCP012688 | XM_009369707 |
| PCP012731 | 7,942514505 | 8,046196362 | 7,894817763 | 8,372125027 | PCP012731 | XM_018650540 |
| PCP012824 | 8,299208018 | 8,405141463 | 8,283875484 | 8,120652609 | PCP012824 | XM_008389083 |
| PCP012846 | 8,908902953 | 8,752648252 | 8,699294818 | 8,743723645 | PCP012846 | XM_008370412 |
| PCP012905 | 8,370687407 | 8,17990909  | 8,338379842 | 8,103287808 | PCP012905 | XM_009336424 |
| PCP012906 | 7,470292816 | 7,459431619 | 7,624466495 | 7,257387843 |           |              |
| PCP012927 | 8,652235507 | 8,344295908 | 8,471675214 | 8,431831861 | PCP012927 | XM_009338883 |
| PCP012937 | 8,622051819 | 8,434628228 | 8,053491515 | 7,876516947 | PCP012937 | XM_009338868 |
| PCP012954 | 8,022367813 | 8,115459877 | 7,847558521 | 7,392317423 | PCP012954 | XM_008381874 |
| PCP012959 | 6,60481265  | 6,922792504 | 7,206232954 | 7,54689446  | PCP012959 | XM_008381898 |
| PCP012967 | 7,990557838 | 7,794415866 | 8,022367813 | 8,320439548 | PCP012967 | XM_009352058 |
| PCP012973 | 7,574934058 | 7,71651083  | 7,723353774 | 7,602364826 |           |              |
| PCP012974 | 7,475733431 | 7,392317423 | 7,684187561 | 8,174925683 |           |              |
| PCP013003 | 7,554588852 | 7,711976642 | 7,977279923 | 8,212715235 | PCP013003 | XM_009365219 |
| PCP013034 | 8,341318667 | 8,342830273 | 8,566054038 | 9,029756544 |           |              |
| PCP013067 | 8,386595423 | 7,936637939 | 7,950293432 | 7,50517639  | PCP013067 | XM_008342088 |
| PCP013072 | 8,096293483 | 8,296136161 | 7,743689989 | 7,235248379 |           |              |
| PCP013073 | 7,125878364 | 6,857980995 | 7,037052702 | 6,81159947  | PCP013073 | XM_017323521 |
| PCP013083 | 8,637820329 | 8,890781061 | 8,948367232 | 8,744833837 | PCP013083 | XM_008341593 |
| PCP013087 | 8,092757141 | 8,268331458 | 8,41079052  | 9,167418146 | PCP013087 | XM_017323783 |
| PCP013088 | 8,347267018 | 8,553322101 | 8,412231097 | 8,409390936 | PCP013088 | XM_008341588 |
| PCP013089 | 7,963878669 | 8,262094845 | 8,163247124 | 8,136119594 | PCP013089 | XM_008354734 |
| PCP013091 | 7,928784831 | 7,826548487 | 7,736943052 | 7,796558821 | PCP013091 | XM_008354736 |
| PCP013092 | 7           | 7,011227255 | 7,260496187 | 7,946438456 |           |              |

|           |             |             |             |             |           |              |
|-----------|-------------|-------------|-------------|-------------|-----------|--------------|
| PCP013124 | 7,832890014 | 7,940577883 | 8,064311643 | 8,474395481 | PCP013124 | XM_008393284 |
| PCP013125 | 7,380850638 | 7,266786541 | 7,785746699 | 8,341318667 | PCP013125 | XM_009354338 |
| PCP013128 | 7,206232954 | 7,655852677 | 7,975389442 | 8,413627929 | PCP013128 | XM_018646661 |
| PCP013135 | 6,942514505 | 6,832890014 | 7,392317423 | 8,080391184 | PCP013135 | XM_009354364 |
| PCP013136 | 6,845490051 | 6,691115365 | 7,30679083  | 8,224001674 | PCP013136 | XM_009354367 |
| PCP013138 | 7,787902559 | 7,977279923 | 8,141238626 | 8,445718428 | PCP013138 | XM_009354371 |
| PCP013140 | 6,906890596 | 6,658211483 | 6,984931073 | 7,3458044   | PCP013140 | XM_009354376 |
| PCP013152 | 8,363390129 | 8,442943496 | 8,364878797 | 8,031604721 |           |              |
| PCP013158 | 7,918863237 | 8,071462363 | 8,361943774 | 7,783522135 |           |              |
| PCP013165 | 8,640244936 | 8,431831861 | 8,752648252 | 9,045295522 |           |              |
| PCP013173 | 8,788979283 | 8,631795481 | 8,762647796 | 9,087462841 |           |              |
| PCP013178 | 7,434628228 | 7,609769734 | 7,497213158 | 7,434628228 | PCP013178 | XM_018650789 |
| PCP013181 | 6,667750232 | 6,754887502 | 6,853870927 | 7,309885571 | PCP013181 | XM_017330149 |
| PCP013182 | 8,101555535 | 8,191454081 | 8,271463028 | 8,62450305  | PCP013182 | XM_009370935 |
| PCP013184 | 6,845490051 | 7,193081765 | 7,315874125 | 7,688809791 | PCP013184 | XM_009370934 |
| PCP013187 | 8,117227504 | 8,30833903  | 8,373604714 | 8,653454181 |           |              |
| PCP013189 | 7,646234675 | 7,973439079 | 7,942514505 | 7,855927425 |           |              |
| PCP013208 | 7,156538193 | 7,30679083  | 7,312882955 | 7,153095972 | PCP013208 | XM_009370894 |
| PCP013214 | 7,395148508 | 7,282347131 | 7,403693786 | 8,098032083 | PCP013214 | XM_009370882 |
| PCP013215 | 7,539158811 | 7,807354922 | 7,87036472  | 8,212715235 | PCP013215 | XM_009350501 |
| PCP013218 | 7,996219247 | 8,153146652 | 8,422064766 | 9,670656249 | PCP013218 | XM_009340068 |
| PCP013228 | 7,156538193 | 7,294620749 | 7,324900589 | 7,026025399 |           |              |
| PCP013236 | 7,71651083  | 7,686500527 | 7,860031646 | 8,463524373 | PCP013236 | XM_008379392 |
| PCP013240 | 7,98111057  | 8,098032083 | 8,101555535 | 8,46760555  | PCP013240 | XM_009340003 |
| PCP013262 | 7,483815777 | 7,813781191 | 8,087462841 | 8,612241904 | PCP013262 | XM_009365947 |
| PCP013265 | 7,851749041 | 7,837123296 | 7,845490051 | 8,395191361 | PCP013265 | XM_009365996 |
| PCP013273 | 7,375039431 | 7,380850638 | 7,30679083  | 7,115511897 | PCP013273 | XM_009366117 |
| PCP013288 | 6,878602742 | 6,772545519 | 6,798698597 | 7,417852515 | PCP013288 | XM_009366379 |
| PCP013296 | 8,321928095 | 7,77478706  | 8,206184105 | 7,860031646 | PCP013296 | XM_009346990 |
| PCP013298 | 7,003714662 | 6,837060204 | 7,047996356 | 7,641473777 | PCP013298 | XM_009346998 |
| PCP013309 | 7,222360218 | 7,129283017 | 7,196430001 | 7,866228001 | PCP013309 | XM_018645903 |
| PCP013314 | 7,641473777 | 7,62935662  | 7,54689446  | 8,212715235 |           |              |
| PCP013318 | 8,43325159  | 8,445718428 | 8,764871591 | 9,210257347 | PCP013318 | XM_009339849 |
| PCP013319 | 8,018645301 | 7,98111057  | 8,239980333 | 8,517000043 | PCP013319 | XM_008393227 |
| PCP013359 | 8,658211483 | 8,772578508 | 8,687655621 | 9,053464362 | PCP013359 | XM_009376244 |
| PCP013362 | 6,906890596 | 6,528727582 | 6,894817763 | 7,330916878 | PCP013362 | XM_009376254 |
| PCP013366 | 7,924812504 | 7,992485211 | 8,049848549 | 7,820178962 |           |              |
| PCP013373 | 7,276124405 | 6,169925001 | 6,87036472  | 7,129283017 |           |              |
| PCP013377 | 8,537878433 | 8,380807357 | 8,294620749 | 8,372125027 | PCP013377 | XM_009367891 |
| PCP013378 | 7,92677039  | 7,518299077 | 7,956114749 | 7,714245518 | PCP013378 | XM_009367887 |
| PCP013382 | 7,841281284 | 7,648681141 | 7,602364826 | 7,569855608 |           |              |
| PCP013388 | 8,434628228 | 8,296136161 | 8,198052084 | 8,158205728 |           |              |
| PCP013394 | 6,99242856  | 6,523561956 | 7,263691734 | 6,950351762 | PCP013394 | XM_009343531 |
| PCP013398 | 8,051643995 | 7,798763389 | 7,794415866 | 7,834976616 |           |              |
| PCP013401 | 6,254178286 | 6,874428132 | 7,718841075 | 7,946438456 | PCP013401 | XM_009343521 |
| PCP013404 | 8,356099782 | 8,118941073 | 8,419243918 | 8,636624621 |           |              |

|           |             |             |             |             |           |              |
|-----------|-------------|-------------|-------------|-------------|-----------|--------------|
| PCP013418 | 7           | 6,942514505 | 7,225641265 | 6,853870927 |           |              |
| PCP013434 | 8,592457037 | 8,297695831 | 8,169925001 | 7,847558521 | PCP013434 | XM_018643903 |
| PCP013437 | 7,206232954 | 6,81159947  | 6,996275749 | 7,557119022 | PCP013437 | XM_017334839 |
| PCP013489 | 7,554588852 | 7,796558821 | 7,752681699 | 7,263691734 |           |              |
| PCP013494 | 3,663344619 | 5,727920455 | 7,597456684 | 13,73064739 | PCP013494 | NM_001302321 |
| PCP013501 | 7,199672345 | 7,209453366 | 7,069637728 | 6,87036472  | PCP013501 | XM_009359249 |
| PCP013509 | 7,988684687 | 7,832890014 | 8,016808288 | 8,360495967 | PCP013509 | XM_009359265 |
| PCP013549 | 8,530094158 | 8,48651327  | 8,636624621 | 8,420676082 | PCP013549 | XM_009348936 |
| PCP013550 | 7,497213158 | 7,691185174 | 7,559721231 | 6,874428132 | PCP013550 | XM_008340574 |
| PCP013564 | 7,247927513 | 7,209453366 | 7,375039431 | 8,04072808  | PCP013564 | XM_009376727 |
| PCP013588 | 6,845490051 | 6,910852562 | 7,094552786 | 8,046196362 |           |              |
| PCP013589 | 8,239980333 | 8,04072808  | 7,967687386 | 7,684187561 | PCP013589 | XM_009350024 |
| PCP013590 | 7,772611496 | 8,156487632 | 8,689997971 | 9,13442632  |           |              |
| PCP013598 | 8,120652609 | 7,890750668 | 8,020535537 | 7,864186145 | PCP013598 | XM_018642525 |
| PCP013610 | 7,315874125 | 7,260496187 | 7,533952624 | 7,818070833 | PCP013610 | XM_009369631 |
| PCP013619 | 8,144658243 | 8,400879436 | 8,510447709 | 8,899870461 | PCP013619 | XM_009369618 |
| PCP013625 | 8,348728154 | 8,181549844 | 8,168270966 | 7,960001932 | PCP013625 | XM_009355348 |
| PCP013632 | 7,904905525 | 8,014968933 | 8,288496992 | 8,110248388 | PCP013632 | XM_009355355 |
| PCP013642 | 8,62935662  | 8,863164132 | 8,732438807 | 8,335390355 | PCP013642 | XM_009377978 |
| PCP013644 | 8,405141463 | 8,72904287  | 8,793343194 | 8,97441459  |           |              |
| PCP013648 | 7,783522135 | 8,348728154 | 8,315919398 | 8,222408523 | PCP013648 | XM_009356330 |
| PCP013652 | 8,022367813 | 7,660566438 | 8,096293483 | 8,677120596 | PCP013652 | XM_009356267 |
| PCP013653 | 8,376472723 | 8,306836389 | 8,317412614 | 8,277659361 | PCP013653 | XM_009356256 |
| PCP013666 | 8,43325159  | 8,300718622 | 8,350187812 | 8,857980995 | PCP013666 | XM_021832237 |
| PCP013675 | 8,306836389 | 8,930737338 | 8,470333494 | 8,787902559 | PCP013675 | XM_009348772 |
| PCP013684 | 7,076815597 | 6,934634441 | 6,902917719 | 6,81159947  | PCP013684 | XM_018651846 |
| PCP013696 | 8,132731056 | 8,024197765 | 8,103287808 | 7,597456684 |           |              |
| PCP013702 | 7,882643049 | 7,71651083  | 7,845490051 | 8,588714636 | PCP013702 | XM_018650281 |
| PCP013757 | 9,200481794 | 8,943481842 | 8,572397068 | 8,32791187  | PCP013757 | XM_009352072 |
| PCP013764 | 8,640244936 | 8,754887502 | 8,68183575  | 8,557157324 | PCP013764 | XM_009366541 |
| PCP013770 | 7,22881869  | 7,691185174 | 8,009380767 | 8,786825032 | PCP013770 | XM_009361280 |
| PCP013771 | 8,08571145  | 8,21106088  | 8,101555535 | 8,156487632 | PCP013771 | XM_009361284 |
| PCP013796 | 7,14974712  | 7,129283017 | 7,3458044   | 7,805227956 | PCP013796 | XM_017324484 |
| PCP013799 | 6,906890596 | 6,906890596 | 6,898812977 | 7,646234675 | PCP013799 | XM_008377320 |
| PCP013808 | 7,820178962 | 7,912889336 | 8,148069774 | 8,964831792 | PCP013808 | XM_018647648 |
| PCP013812 | 9,211888295 | 8,429071922 | 8,429071922 | 7,818070833 | PCP013812 | XM_009364327 |
| PCP013835 | 6,662917555 | 7,073284692 | 6,988684687 | 7,398059585 | PCP013835 | XM_009337800 |
| PCP013841 | 7,515699838 | 7,327956767 | 7,215969746 | 6,058965822 | PCP013841 | XM_009337790 |
| PCP013846 | 7,948367232 | 8,32791187  | 7,741466986 | 6,946379968 | PCP013846 | XM_009345512 |
| PCP013882 | 7,754887502 | 7,752681699 | 8,038918989 | 8,474395481 | PCP013882 | XM_009341584 |
| PCP013899 | 8,776992236 | 8,833933692 | 8,865207434 | 8,824417827 | PCP013899 | XM_009375409 |
| PCP013900 | 8,326429487 | 8,069691427 | 8,249492747 | 8,092757141 | PCP013900 | XM_008340688 |
| PCP013918 | 7,464913269 | 7,475733431 | 7,520972191 | 7,294620749 | PCP013918 | XM_009354498 |
| PCP013921 | 7,105070402 | 6,772545519 | 7,579919292 | 6,403778984 | PCP013921 | NM_001328880 |
| PCP013929 | 7,018700931 | 7,276124405 | 7,574934058 | 7,494495616 |           |              |
| PCP013935 | 6,700439718 | 7,14974712  | 7,448488033 | 8,451211112 | PCP013935 | XM_009378738 |

|           |             |             |             |             |           |              |
|-----------|-------------|-------------|-------------|-------------|-----------|--------------|
| PCP013936 | 7,499845887 | 7,617136829 | 7,727920455 | 8,430452552 | PCP013936 | XM_009378555 |
| PCP013964 | 8,395191361 | 8,320439548 | 8,130982335 | 8,078577814 | PCP013964 | XM_008341951 |
| PCP013977 | 8,909893084 | 8,831845581 | 8,780277286 | 8,459431619 | PCP013977 | XM_017331339 |
| PCP013980 | 6,996275749 | 7,330916878 | 7,166615031 | 6,727920455 | PCP013980 | XM_009347466 |
| PCP013995 | 7,462134139 | 7,475733431 | 7,231989133 | 6,798698597 | PCP013995 | XM_009374408 |
| PCP014011 | 7,247927513 | 7,398059585 | 7,785746699 | 8,596189756 | PCP014011 | XM_009361912 |
| PCP014015 | 7,636624621 | 7,622051819 | 7,651051691 | 8,176572111 | PCP014015 | XM_009361885 |
| PCP014017 | 7,969645536 | 8,064311643 | 8,184875343 | 7,904905525 | PCP014017 | XM_018643146 |
| PCP014042 | 8,106798463 | 8,28692734  | 8,688844752 | 8,930737338 | PCP014042 | XM_009381361 |
| PCP014088 | 7,977279923 | 8,338379842 | 8,637820329 | 8,865207434 | PCP014088 | XM_008384177 |
| PCP014098 | 6,339850003 | 6,584962501 | 6,922792504 | 7,721099189 | PCP014098 | XM_008374306 |
| PCP014106 | 8,026080745 | 7,904905525 | 7,986809101 | 8,456682963 | PCP014106 | XM_008379660 |
| PCP014112 | 8,940548521 | 8,765965634 | 8,84862294  | 8,37794796  | PCP014112 | XM_009348591 |
| PCP014120 | 7,960001932 | 8,038918989 | 8,214319121 | 8,520932916 | PCP014120 | XM_017323318 |
| PCP014129 | 7,047996356 | 7,076815597 | 7,206232954 | 7,811663685 | PCP014129 | XR_001953275 |
| PCP014145 | 7,426264755 | 7,473056289 | 8,080391184 | 8,511752654 | PCP014145 | XM_009371364 |
| PCP014151 | 8,132731056 | 8,106798463 | 8,199672345 | 7,924812504 |           |              |
| PCP014157 | 8,341318667 | 8,420676082 | 8,477070141 | 8,832890014 | PCP014157 | XM_008371456 |
| PCP014171 | 7,74819285  | 8,178266468 | 8,509101985 | 8,84862294  | PCP014171 | XM_009381068 |
| PCP014182 | 7,434628228 | 7,169925001 | 7,247927513 | 7,055282436 |           |              |
| PCP014259 | 8,106798463 | 8,224001674 | 8,199672345 | 8,588714636 | PCP014259 | XM_008379346 |
| PCP014264 | 6,853870927 | 7,076815597 | 7,21916852  | 7,475733431 |           |              |
| PCP014270 | 6,648609245 | 7,279192684 | 7,761551232 | 8,566054038 | PCP014270 | XM_009353911 |
| PCP014299 | 7,936637939 | 7,768184325 | 7,62935662  | 7,475733431 |           |              |
| PCP014314 | 8,857980995 | 8,54303182  | 8,603626345 | 8,312882955 |           |              |
| PCP014356 | 8,348728154 | 8,257387843 | 8,625708843 | 9,415044544 |           |              |
| PCP014364 | 8,09976859  | 8,022367813 | 7,894817763 | 7,888743249 | PCP014364 | XM_018651584 |
| PCP014412 | 6,491853096 | 6,890811455 | 6,965784285 | 7,199672345 |           |              |
| PCP014426 | 8,478446064 | 8,222408523 | 8,392317423 | 7,886733033 | PCP014426 | XM_009347952 |
| PCP014515 | 6,448405435 | 7,244791942 | 7,539158811 | 7,866228001 | PCP014515 | XM_018645477 |
| PCP014517 | 6,918863237 | 7,417852515 | 7,166615031 | 8,24474438  | PCP014517 | XM_009349335 |
| PCP014530 | 7,996219247 | 7,577428828 | 7,577428828 | 8,169925001 | PCP014530 | XM_008356436 |
| PCP014542 | 6,906890596 | 7,018700931 | 7,28845085  | 7,876516947 | PCP014542 | XM_008339807 |
| PCP014545 | 8,159871337 | 8,332394659 | 7,878541438 | 7,266786541 |           |              |
| PCP014553 | 7,42063398  | 7,339850003 | 7,324900589 | 7,173227395 | PCP014553 | XM_009340385 |
| PCP014557 | 6,946379968 | 6,80309785  | 6,942514505 | 7,437377568 | PCP014557 | XM_009379939 |
| PCP014572 | 6,832890014 | 6,653490009 | 7,029784146 | 7,523561956 | PCP014572 | XM_009376029 |
| PCP014581 | 8,118941073 | 8,018645301 | 8,076815597 | 7,975389442 |           |              |
| PCP014584 | 7,855927425 | 7,754887502 | 7,845490051 | 7,372168569 | PCP014584 | XM_009376060 |
| PCP014587 | 8,459431619 | 8,786825032 | 8,739206792 | 8,456682963 | PCP014587 | XM_018651412 |
| PCP014608 | 7,614709844 | 7,076815597 | 7,448488033 | 7,321928095 |           |              |
| PCP014611 | 7,321928095 | 7,014913158 | 6,938638658 | 6,741466986 | PCP014611 | XM_008349405 |
| PCP014629 | 8,646270682 | 8,276124405 | 8,528766645 | 8,445718428 |           |              |
| PCP014633 | 7,406587689 | 7,398059585 | 7,453929061 | 8,176572111 |           |              |
| PCP014653 | 7,442943496 | 7,069637728 | 7,08395793  | 6,853870927 | PCP014653 | XM_018646015 |
| PCP014658 | 8,477070141 | 8,360495967 | 8,409390936 | 8,118941073 | PCP014658 | XM_017322467 |

|           |             |             |             |             |           |              |
|-----------|-------------|-------------|-------------|-------------|-----------|--------------|
| PCP014662 | 7,324900589 | 7,513095909 | 7,958088658 | 8,106798463 | PCP014662 | XM_008393969 |
| PCP014691 | 7,718841075 | 7,900866808 | 7,990557838 | 8,615923847 |           |              |
| PCP014694 | 7,115511897 | 7,395148508 | 7,670089681 | 8,092757141 | PCP014694 | XM_009353659 |
| PCP014701 | 8,241601875 | 8,437419184 | 8,375039431 | 8,788979283 | PCP014701 | XM_018646501 |
| PCP014713 | 7,312882955 | 7,339850003 | 7,681800619 | 8,166564822 | PCP014713 | XM_009353696 |
| PCP014731 | 6,965784285 | 7,196430001 | 7,50779464  | 7,098032083 |           |              |
| PCP014733 | 8,183238369 | 7,996219247 | 8,220765252 | 8,80841723  |           |              |
| PCP014739 | 7,609769734 | 7,415065677 | 7,688809791 | 7,988684687 | PCP014739 | XM_009366279 |
| PCP014750 | 8,153146652 | 8,005624549 | 8,115459877 | 8,506486109 |           |              |
| PCP014759 | 8,589950702 | 8,589950702 | 8,657032562 | 8,490530019 | PCP014759 | XM_009355020 |
| PCP014779 | 8,396604781 | 8,523561956 | 8,813781191 | 8,266786541 | PCP014779 | XM_009355002 |
| PCP014788 | 8,487840034 | 8,597419437 | 8,626913629 | 9,194756854 |           |              |
| PCP014796 | 6,81159947  | 6,97349648  | 7,269874722 | 7,442943496 |           |              |
| PCP014799 | 8,552015799 | 8,517000043 | 8,711942238 | 8,527477006 | PCP014799 | XM_009341992 |
| PCP014813 | 7,665335917 | 7,186559982 | 7,670089681 | 7,202907418 | PCP014813 | XM_009342020 |
| PCP014814 | 8,241601875 | 8,477070141 | 8,607330314 | 9,06250492  | PCP014814 | XM_009342024 |
| PCP014818 | 7,222360218 | 7,225641265 | 7,173227395 | 8,654636029 | PCP014818 | XM_009342027 |
| PCP014838 | 7,898873426 | 8,069691427 | 7,898873426 | 7,564759219 | PCP014838 | XM_009365803 |
| PCP014867 | 6,87036472  | 6,934634441 | 7,163196797 | 7,6794801   | PCP014867 | XM_008374324 |
| PCP014872 | 8,249492747 | 8,577428828 | 8,427648072 | 8,064311643 | PCP014872 | XM_018650826 |
| PCP014897 | 8,485145023 | 8,409390936 | 8,672425342 | 9,161560218 | PCP014897 | XM_009373459 |
| PCP014905 | 7,730164413 | 7,857980995 | 7,986809101 | 8,438791853 | PCP014905 | XM_009373478 |
| PCP014920 | 8,075051225 | 7,757089938 | 7,732472726 | 8,035238993 | PCP014920 | XM_008393487 |
| PCP014925 | 7,868328714 | 7,785746699 | 8,016808288 | 8,348728154 | PCP014925 | XM_008392965 |
| PCP014940 | 7,166615031 | 6,60481265  | 7           | 6,794415866 |           |              |
| PCP014944 | 7,765998774 | 8,048050866 | 8,550746785 | 9,243173983 |           |              |
| PCP014950 | 7,932687205 | 8,04072808  | 8,279239123 | 8,427648072 | PCP014950 | XM_009355433 |
| PCP014963 | 8           | 8,744833837 | 8,735826768 | 8,611024797 | PCP014963 | XM_017325447 |
| PCP014980 | 8,279239123 | 8,396604781 | 8,188193194 | 7,868328714 | PCP014980 | XM_009377685 |
| PCP014982 | 6,714245518 | 6,64385619  | 6,938638658 | 7,42063398  |           |              |
| PCP015001 | 7,952275317 | 8,13442632  | 8,202956379 | 8,463524373 |           |              |
| PCP015019 | 7,417852515 | 7,169925001 | 7,619633096 | 7,878541438 | PCP015019 | XM_009340331 |
| PCP015047 | 7,624466495 | 7,360452072 | 7,336908182 | 7           | PCP015047 | XM_009363852 |
| PCP015048 | 7,494495616 | 7,354646096 | 7,536596918 | 8,037107627 | PCP015048 | XM_009363853 |
| PCP015053 | 8,530094158 | 8,640244936 | 8,830768706 | 8,996247498 |           |              |
| PCP015080 | 5,781359714 | 6,815959618 | 7,392317423 | 10,44570808 | PCP015080 | XR_668418    |
| PCP015090 | 7,417852515 | 7,481153605 | 7,660566438 | 8,263644792 | PCP015090 | XM_009379315 |
| PCP015094 | 8,136119594 | 8,141238626 | 8,372125027 | 8,198052084 | PCP015094 | XM_009379304 |
| PCP015102 | 8,001858526 | 7,83080039  | 7,832890014 | 7,874489611 | PCP015102 | XM_009377283 |
| PCP015124 | 7,528805707 | 7,702726796 | 7,743689989 | 8,338379842 | PCP015124 | XM_018645785 |
| PCP015128 | 7,380850638 | 7,062531903 | 7,434628228 | 7,757089938 | PCP015128 | XM_009337404 |
| PCP015141 | 8,044394119 | 8,120652609 | 8,130982335 | 7,491853096 | PCP015141 | XM_009379476 |
| PCP015171 | 8,323415108 | 8,271463028 | 8,344295908 | 8,168270966 | PCP015171 | XM_009347108 |
| PCP015172 | 8,77807713  | 8,961941603 | 9,021451966 | 8,243173983 |           |              |
| PCP015206 | 8,024197765 | 7,617136829 | 7,886733033 | 7,818070833 | PCP015206 | XM_009367006 |
| PCP015207 | 7,196430001 | 7,14974712  | 7,470292816 | 8,136119594 |           |              |

|           |             |             |             |             |           |              |
|-----------|-------------|-------------|-------------|-------------|-----------|--------------|
| PCP015209 | 8,154818109 | 8,110248388 | 8,117227504 | 7,95419631  |           |              |
| PCP015232 | 7,398059585 | 7,040782866 | 7,209453366 | 7,101503009 |           |              |
| PCP015261 | 7,440204752 | 7,260496187 | 7,266786541 | 7,209453366 | PCP015261 | XM_008366226 |
| PCP015270 | 7,448488033 | 6,87036472  | 7,741466986 | 7,967687386 | PCP015270 | XM_009365879 |
| PCP015282 | 7,579919292 | 7,582480735 | 7,912889336 | 8,441574774 |           |              |
| PCP015290 | 7,709635275 | 7,822284016 | 7,874489611 | 8,241601875 | PCP015290 | XM_018646415 |
| PCP015296 | 7,080337882 | 6,768184325 | 6,977279923 | 7,655852677 | PCP015296 | XM_009349932 |
| PCP015297 | 8,282300792 | 8,509101985 | 8,513056419 | 8,941546519 | PCP015297 | XM_008393897 |
| PCP015312 | 7,904905525 | 8,013071384 | 7,851749041 | 7,888743249 | PCP015312 | NM_001294001 |
| PCP015322 | 7,011227255 | 7,315874125 | 7,222360218 | 6,143026004 |           |              |
| PCP015326 | 7,569855608 | 7,604886762 | 7,63175911  | 8,13442632  | PCP015326 | XM_018649884 |
| PCP015329 | 7,215969746 | 7,206232954 | 6,64385619  | 6,619559738 | PCP015329 | XM_009369529 |
| PCP015352 | 7,279192684 | 7,526147081 | 7,497213158 | 8,263644792 | PCP015352 | XM_008341121 |
| PCP015404 | 7,327956767 | 7,206232954 | 7,372168569 | 7,761551232 |           |              |
| PCP015412 | 6,958030641 | 6,464831606 | 7,462134139 | 7,677155841 |           |              |
| PCP015418 | 7,994353437 | 7,750405521 | 7,837123296 | 7,672425342 |           |              |
| PCP015435 | 6,732404887 | 7,257387843 | 7,515699838 | 8,003770871 | PCP015435 | XM_018648522 |
| PCP015439 | 8,285402219 | 8,274587815 | 8,449850215 | 8,73470962  | PCP015439 | XM_009363102 |
| PCP015441 | 8,055282436 | 8,235200503 | 8,514398461 | 8,968666793 |           |              |
| PCP015446 | 8,113742166 | 7,924812504 | 8,08571145  | 8,576181982 | PCP015446 | XM_009373493 |
| PCP015457 | 7,878541438 | 7,333870928 | 7,906890596 | 6,497133304 | PCP015457 | XM_008386040 |
| PCP015460 | 7,018700931 | 7,324900589 | 7,890750668 | 8,513056419 | PCP015460 | NM_001328737 |
| PCP015466 | 8,557157324 | 8,375039431 | 8,519636253 | 8,124121312 | PCP015466 | XM_008371987 |
| PCP015488 | 8,21916852  | 8,141238626 | 8,132731056 | 7,839203788 | PCP015488 | XM_018643155 |
| PCP015492 | 7,105070402 | 7,105070402 | 7,241554209 | 6,658211483 | PCP015492 | XM_009339090 |
| PCP015523 | 7,62935662  | 7,853808564 | 7,984874125 | 8,257387843 |           |              |
| PCP015524 | 7,809478757 | 7,619633096 | 7,686500527 | 7,651051691 | PCP015524 | XM_008394195 |
| PCP015527 | 8,188193194 | 8,388017285 | 8,475733431 | 8,727920455 |           |              |
| PCP015540 | 7,988684687 | 8,020535537 | 8,159871337 | 8,677120596 | PCP015540 | XM_009344444 |
| PCP015551 | 7,50517639  | 8,146339557 | 7,662988741 | 6,80309785  | PCP015551 | XM_017327045 |
| PCP015554 | 6,691115365 | 6,539158811 | 7,022367813 | 7,372168569 | PCP015554 | XM_008370342 |
| PCP015560 | 7,459431619 | 7,549438149 | 7,98111057  | 8,024197765 | PCP015560 | XM_009355762 |
| PCP015570 | 8,364878797 | 8,288496992 | 8,572397068 | 8,791162889 |           |              |
| PCP015574 | 7,101503009 | 7,380850638 | 7,251056285 | 7,674757228 | PCP015574 | XM_008352642 |
| PCP015585 | 7,872397856 | 7,619633096 | 7,743689989 | 7,698149009 |           |              |
| PCP015586 | 7,531381461 | 7,339850003 | 7,383704292 | 7,276124405 |           |              |
| PCP015595 | 6,837060204 | 7,118941073 | 7,17990909  | 7,634230226 | PCP015595 | XM_009365118 |
| PCP015604 | 8,407989993 | 8,475733431 | 8,768184325 | 9,312134193 | PCP015604 | XM_009380907 |
| PCP015633 | 7,624466495 | 7,820178962 | 7,003714662 | 5,841218374 | PCP015633 | XM_009375134 |
| PCP015634 | 7,17990909  | 6,807354922 | 6,882643049 | 7,448488033 | PCP015634 | XM_009375132 |
| PCP015635 | 7,279192684 | 7,06608919  | 7,395148508 | 7,702726796 | PCP015635 | XM_009375129 |
| PCP015644 | 7,930737338 | 7,948367232 | 7,711976642 | 7,607330314 |           |              |
| PCP015648 | 6,898812977 | 7,222360218 | 7,215969746 | 7,651051691 | PCP015648 | XM_009336018 |
| PCP015686 | 8,204571144 | 8,345760055 | 8,466260038 | 8,890781061 |           |              |
| PCP015720 | 8,482485305 | 8,5824431   | 8,62935662  | 9,130132926 |           |              |
| PCP015729 | 8,098032083 | 8,571107931 | 9,000929563 | 9,295378654 |           |              |

|           |             |             |             |             |           |              |
|-----------|-------------|-------------|-------------|-------------|-----------|--------------|
| PCP015756 | 7,61227877  | 7,634230226 | 7,607330314 | 8,19313106  | PCP015756 | XM_021951602 |
| PCP015759 | 7,007531912 | 6,857980995 | 7,007531912 | 6,777025123 | PCP015759 | XM_009344640 |
| PCP015783 | 7,54689446  | 7,206232954 | 7,166615031 | 6,420718183 |           |              |
| PCP015785 | 7,587440004 | 7,61227877  | 7,961912672 | 8,263644792 | PCP015785 | XM_008393418 |
| PCP015790 | 8,163247124 | 8,101555535 | 8,363390129 | 8,108524457 | PCP015790 | XM_008375273 |
| PCP015802 | 8,158205728 | 8,254225537 | 8,350187812 | 8,718806834 | PCP015802 | XM_009374124 |
| PCP015812 | 7,163196797 | 7,166615031 | 7,594921715 | 7,730164413 | PCP015812 | XM_008366530 |
| PCP015829 | 8,335390355 | 8,290018847 | 8,494535617 | 8,826548487 | PCP015829 | XM_009381060 |
| PCP015839 | 6,686500527 | 6,86628983  | 6,95419631  | 7,528805707 | PCP015839 | XM_009357960 |
| PCP015846 | 7,330916878 | 7,655852677 | 7,878541438 | 8,723387907 | PCP015846 | XM_018652354 |
| PCP015848 | 7,853808564 | 8,051643995 | 8,186510462 | 8,768184325 |           |              |
| PCP015856 | 8,146339557 | 8,255831156 | 7,996219247 | 7,073284692 |           |              |
| PCP015860 | 7,707359132 | 7,587440004 | 7,366322214 | 7,360452072 |           |              |
| PCP015868 | 7,956114749 | 7,757089938 | 7,759355602 | 7,783522135 | PCP015868 | XM_021968888 |
| PCP015876 | 7,670089681 | 8,154818109 | 7,853808564 | 8           | PCP015876 | XM_009345547 |
| PCP015878 | 7,572359168 | 7,564759219 | 7,818070833 | 7,544346278 | PCP015878 | XM_018643030 |
| PCP015927 | 7,510408147 | 7,499845887 | 7,62935662  | 8,137862104 | PCP015927 | XM_008378850 |
| PCP015944 | 7,254272787 | 7,440204752 | 7,389480771 | 6,996275749 | PCP015944 | XM_018650320 |
| PCP015952 | 8,873444113 | 8,520932916 | 8,732438807 | 8,597419437 | PCP015952 | XM_009373718 |
| PCP016030 | 7,146390476 | 7,108524457 | 6,938638658 | 6,700439718 | PCP016030 | XM_018651423 |
| PCP016063 | 6,930737338 | 7,222360218 | 7,122362117 | 7,837123296 | PCP016063 | XM_009341766 |
| PCP016065 | 7,276124405 | 7,105070402 | 6,820178962 | 6,339850003 | PCP016065 | XM_009349739 |
| PCP016141 | 7,677155841 | 8,183238369 | 7,811663685 | 8,106798463 | PCP016141 | XM_009363863 |
| PCP016147 | 8,481113232 | 8,209453366 | 8,326429487 | 8,347267018 | PCP016147 | XM_009363930 |
| PCP016155 | 7,77036657  | 7,828644274 | 8,191454081 | 7,967687386 | PCP016155 | XM_009364065 |
| PCP016160 | 6,984931073 | 7,08395793  | 7,28845085  | 7,634230226 | PCP016160 | XM_009364123 |
| PCP016167 | 7,451211112 | 7,617136829 | 7,634230226 | 7,366322214 | PCP016167 | XM_009364281 |
| PCP016179 | 7,324900589 | 7,189824559 | 7,044394119 | 7,118941073 | PCP016179 | XM_009364488 |
| PCP016180 | 8,948367232 | 8,724513853 | 8,302273349 | 6,926829678 | PCP016180 | XM_009364497 |
| PCP016184 | 7,429030064 | 7,069637728 | 7,562242424 | 7,044394119 | PCP016184 | XM_018648807 |
| PCP016185 | 8,715378619 | 8,189824559 | 8,564797319 | 8,909893084 | PCP016185 | XM_009364554 |
| PCP016199 | 7,924812504 | 8,366322214 | 8,260543232 | 8,422064766 | PCP016199 | XR_667973    |
| PCP016205 | 7,998139076 | 7,890750668 | 7,878541438 | 8,303780748 | PCP016205 | XM_009364774 |
| PCP016211 | 7,750405521 | 7,572359168 | 7,670089681 | 7,541716163 | PCP016211 | XM_009364917 |
| PCP016227 | 8,117227504 | 8,279239123 | 8,35169016  | 8,761551232 |           |              |
| PCP016260 | 7,77036657  | 7,557119022 | 7,641473777 | 7,279192684 | PCP016260 | XM_009345037 |
| PCP016271 | 7,483815777 | 7,456724026 | 7,412188747 | 7,862141394 | PCP016271 | XM_009373296 |
| PCP016278 | 8,481113232 | 8,559682997 | 7,88062431  | 7,526147081 | PCP016278 | XM_009373316 |
| PCP016292 | 6,714245518 | 6,686500527 | 6,996275749 | 7,725673    | PCP016292 | XM_009373330 |
| PCP016298 | 8,405141463 | 8,189824559 | 8,321928095 | 8,186510462 |           |              |
| PCP016322 | 7,619633096 | 7,843418611 | 7,998139076 | 8,312882955 |           |              |
| PCP016343 | 6,922792504 | 6,700439718 | 7,557119022 | 7,54689446  |           |              |
| PCP016345 | 7,132679654 | 7,276124405 | 7           | 6,272956308 | PCP016345 | XM_009376395 |
| PCP016360 | 8,238404739 | 8,427648072 | 8,151422517 | 7,948367232 | PCP016360 | XM_009349772 |
| PCP016361 | 8,548166865 | 8,532667615 | 8,483815777 | 8,483815777 | PCP016361 | XM_009363451 |
| PCP016364 | 8,04072808  | 7,918863237 | 8,318904285 | 8,576181982 |           |              |

|           |             |             |             |             |           |              |
|-----------|-------------|-------------|-------------|-------------|-----------|--------------|
| PCP016368 | 8,341318667 | 7,969645536 | 8,101555535 | 8,003770871 | PCP016368 | XM_009363269 |
| PCP016394 | 8,21106088  | 8,255831156 | 8,449850215 | 7,6794801   | PCP016394 | XM_009362806 |
| PCP016401 | 7,641473777 | 7,377904593 | 7,094552786 | 6,828707735 | PCP016401 | XM_009362722 |
| PCP016407 | 7,868328714 | 7,805227956 | 8,124121312 | 8,350187812 |           |              |
| PCP016419 | 7,026025399 | 7,30679083  | 7,437377568 | 7,77036657  | PCP016419 | XM_009341516 |
| PCP016458 | 7,526147081 | 7,478405614 | 7,815895594 | 8,018645301 | PCP016458 | XM_009375684 |
| PCP016462 | 7,499845887 | 7,44567705  | 7,297649983 | 6,691115365 |           |              |
| PCP016464 | 8,089212109 | 7,796558821 | 7,914863459 | 8,309840108 |           |              |
| PCP016479 | 6,686500527 | 6,691115365 | 6,768184325 | 7,309885571 | PCP016479 | XM_009368757 |
| PCP016506 | 8,011227255 | 7,963878669 | 7,876516947 | 8,379378367 | PCP016506 | XM_008352603 |
| PCP016523 | 8,279239123 | 8,43325159  | 8,567309664 | 8,780277286 | PCP016523 | XM_008352607 |
| PCP016525 | 8,293103743 | 7,961912672 | 7,994353437 | 7,988684687 | PCP016525 | XM_009370371 |
| PCP016533 | 7,811663685 | 7,754887502 | 7,752681699 | 7,330916878 | PCP016533 | XM_009368716 |
| PCP016534 | 7,392317423 | 7,745976779 | 7,781359714 | 8,288496992 | PCP016534 | XM_008340571 |
| PCP016567 | 8,853839746 | 8,742578916 | 8,788979283 | 8,515699838 |           |              |
| PCP016570 | 8,779161208 | 8,642665475 | 8,639051236 | 9,050746552 | PCP016570 | XM_009359352 |
| PCP016578 | 6,777025123 | 6,84962403  | 6,781359714 | 7,309885571 | PCP016578 | XM_008386101 |
| PCP016592 | 8,646270682 | 8,709669735 | 8,639051236 | 8,682994584 | PCP016592 | XM_009352255 |
| PCP016595 | 8,21757002  | 8,862110391 | 8,718806834 | 8,944477815 | PCP016595 | XM_009352228 |
| PCP016596 | 7,040782866 | 7,665335917 | 7,309885571 | 7,309885571 | PCP016596 | XM_008364022 |
| PCP016606 | 8,151422517 | 8,003770871 | 8,318904285 | 8,075051225 | PCP016606 | XM_018649117 |
| PCP016610 | 7,648681141 | 7,725673    | 7,686500527 | 7,333870928 | PCP016610 | XM_009365846 |
| PCP016615 | 8,288496992 | 8,354602022 | 8,474395481 | 8,916864735 | PCP016615 | XM_009365842 |
| PCP016627 | 8,266786541 | 8,708497652 | 8,055282436 | 6,874428132 | PCP016627 | XM_009346530 |
| PCP016632 | 8,174925683 | 8,434628228 | 8,626913629 | 9,344295908 | PCP016632 | XM_009346534 |
| PCP016633 | 8,189824559 | 8,445718428 | 8,536558066 | 8,786825032 | PCP016633 | XM_009346536 |
| PCP016645 | 7,022367813 | 7,244791942 | 6,750472519 | 6,672425342 |           |              |
| PCP016647 | 7,677155841 | 7,440204752 | 7,74819285  | 8,112022407 | PCP016647 | XM_008395580 |
| PCP016652 | 8,204571144 | 8,357552005 | 8,445718428 | 8,72904287  |           |              |
| PCP016665 | 8,156487632 | 8,449850215 | 8,303780748 | 8,383704292 | PCP016665 | XM_009366577 |
| PCP016674 | 7,562242424 | 7,215969746 | 7,695785075 | 8,173277373 | PCP016674 | XR_001953775 |
| PCP016682 | 7,321928095 | 7,824449651 | 8,127581695 | 8,868297843 | PCP016682 | XM_009367040 |
| PCP016694 | 7,956114749 | 7,946438456 | 8,373604714 | 8,971543554 |           |              |
| PCP016720 | 7,584962501 | 7,423494135 | 7,653418353 | 8,290018847 | PCP016720 | XM_009373607 |
| PCP016723 | 7,087462841 | 6,950351762 | 7,17990909  | 7,572359168 |           |              |
| PCP016724 | 7,794415866 | 7,607330314 | 7,569855608 | 7,440204752 | PCP016724 | XM_018650861 |
| PCP016729 | 7,805227956 | 8,252665432 | 8,503825738 | 9,159871337 | PCP016729 | XM_009370109 |
| PCP016755 | 8,372125027 | 8,146339557 | 8,042589623 | 7,725673    | PCP016755 | XM_009371753 |
| PCP016758 | 7,992485211 | 7,707359132 | 7,982993575 | 8,28077077  | PCP016758 | XM_009371756 |
| PCP016760 | 7,076815597 | 7,260496187 | 6,853870927 | 8,233619677 | PCP016760 | XM_009347557 |
| PCP016764 | 7,90285744  | 8,007475849 | 8,105018005 | 8,39373366  | PCP016764 | XM_009347561 |
| PCP016770 | 7,453929061 | 7,464913269 | 7,798763389 | 8,363390129 | PCP016770 | XM_009350476 |
| PCP016784 | 7,412188747 | 7,50517639  | 7,6794801   | 8,103287808 | PCP016784 | XM_008344750 |
| PCP016790 | 7,54689446  | 7,166615031 | 7,125878364 | 6,890811455 | PCP016790 | XM_009340499 |
| PCP016791 | 7,982993575 | 7,757089938 | 7,63175911  | 7,832890014 | PCP016791 | XM_009366206 |
| PCP016799 | 8,493174961 | 8,347267018 | 7,494495616 | 6,667750232 | PCP016799 | XM_008361670 |



|           |             |             |             |             |           |              |
|-----------|-------------|-------------|-------------|-------------|-----------|--------------|
| PCP016808 | 6,918863237 | 6,624539604 | 7,029784146 | 7,539158811 | PCP016808 | XM_009366182 |
| PCP016831 | 7,058857621 | 7,294620749 | 7,544346278 | 8,058911723 |           |              |
| PCP016835 | 8,946409212 | 8,174925683 | 7,87036472  | 7,541716163 | PCP016835 | XM_009348049 |
| PCP016838 | 8,341318667 | 8,233619677 | 8,361943774 | 8,13442632  |           |              |
| PCP016842 | 7,847558521 | 8,105018005 | 8,309840108 | 8,251103639 | PCP016842 | XM_008344392 |
| PCP016850 | 8,429071922 | 8,489165579 | 8,45532722  | 8,406545173 | PCP016850 | XM_017336317 |
| PCP016858 | 8,279239123 | 8,348728154 | 8,464872438 | 8,90288758  | PCP016858 | XM_008390328 |
| PCP016862 | 7,520972191 | 7,189824559 | 7,453929061 | 7,994353437 | PCP016862 | XM_008368614 |
| PCP016883 | 8,164906927 | 8,188193194 | 8,285402219 | 8,692336525 | PCP016883 | XM_009339217 |
| PCP016912 | 7,515699838 | 7,63175911  | 7,499845887 | 7,513095909 | PCP016912 | XM_018649934 |
| PCP016932 | 7,285402219 | 7,018700931 | 6,72342204  | 6,523561956 | PCP016932 | XM_009360950 |
| PCP016934 | 8,268331458 | 8,335390355 | 8,288496992 | 8,296136161 | PCP016934 | XM_008368139 |
| PCP016935 | 8,804131021 | 8,58747751  | 8,611024797 | 8,640244936 | PCP016935 | XM_008360909 |
| PCP016960 | 8,354602022 | 8,129283017 | 8,029728942 | 8,098032083 | PCP016960 | XM_009351364 |
| PCP016982 | 7,14974712  | 6,84962403  | 6,777025123 | 6,910852562 |           |              |
| PCP016983 | 7,794415866 | 7,617136829 | 7,890750668 | 8,407989993 | PCP016983 | XM_009351081 |
| PCP016994 | 8,514398461 | 8,3994702   | 8,976334992 | 9,312134193 | PCP016994 | XM_008351763 |
| PCP016996 | 8,601139355 | 8,320439548 | 8,510447709 | 8,380807357 | PCP016996 | XM_009352755 |
| PCP017016 | 8,016808288 | 8,222408523 | 8,549476655 | 8,705044823 | PCP017016 | XM_009379519 |
| PCP017021 | 7,375039431 | 7,779194046 | 7,912889336 | 9,122388003 |           |              |
| PCP017030 | 7,614709844 | 7,686500527 | 7,952275317 | 8,3994702   | PCP017030 | XM_009373116 |
| PCP017048 | 8,407989993 | 8,139551352 | 8,296136161 | 8,61717357  | PCP017048 | XM_009344066 |
| PCP017099 | 7,711976642 | 8,013071384 | 7,960001932 | 7,750405521 | PCP017099 | XM_009337013 |
| PCP017127 | 7,42063398  | 7,811663685 | 7,677155841 | 8,30833903  | PCP017127 | XM_009361830 |
| PCP017130 | 8,37794796  | 8,064311643 | 8,196380818 | 8,115459877 | PCP017130 | XM_009361870 |
| PCP017134 | 7,50517639  | 6,874428132 | 6,946379968 | 7,552054236 | PCP017134 | XM_008369429 |
| PCP017142 | 7,17990909  | 7,845490051 | 8,241601875 | 9,337621902 | PCP017142 | XM_009354251 |
| PCP017179 | 6,518377768 | 6,714245518 | 6,934634441 | 7,269874722 | PCP017179 | XM_009379328 |
| PCP017181 | 8,060695932 | 7,562242424 | 7,811663685 | 7,845490051 | PCP017181 | XM_009379333 |
| PCP017182 | 7,055282436 | 7,196430001 | 7,111970261 | 6,686500527 | PCP017182 | XM_009379271 |
| PCP017187 | 8,060695932 | 8,19313106  | 8,39373366  | 8,645045922 | PCP017187 | XM_018991081 |
| PCP017228 | 7,153095972 | 6,648609245 | 9,830245815 | 8,933690655 | PCP017228 | XM_009359507 |
| PCP017230 | 8,485145023 | 8,86727874  | 8,943481842 | 9,028817757 | PCP017230 | XM_009359510 |
| PCP017235 | 7,922851957 | 8,007475849 | 8,046196362 | 7,828644274 |           |              |
| PCP017243 | 7,961912672 | 7,417852515 | 6,807354922 | 6,942514505 |           |              |
| PCP017251 | 7,037052702 | 7,098032083 | 7,383704292 | 7,932687205 | PCP017251 | XM_009340147 |
| PCP017255 | 8,159871337 | 8,407989993 | 8,54689446  | 9,279215904 | PCP017255 | XM_009359853 |
| PCP017258 | 7,440204752 | 7,186559982 | 7,50779464  | 7,896816753 |           |              |
| PCP017262 | 8,024197765 | 8,622051819 | 8,171577143 | 8,389437748 | PCP017262 | XM_017329987 |
| PCP017275 | 6,790120385 | 7,037052702 | 7,536596918 | 7,473056289 | PCP017275 | XM_008374865 |
| PCP017278 | 7,28845085  | 7,526147081 | 7,389480771 | 7,037052702 | PCP017278 | XM_009344784 |
| PCP017302 | 7,672425342 | 7,142923928 | 6,50779464  | 6,534030467 | PCP017302 | XM_009364919 |
| PCP017329 | 8,372125027 | 8,386595423 | 8,541754876 | 8,851749041 |           |              |
| PCP017342 | 9,188168462 | 8,74708524  | 8,344295908 | 8,21916852  | PCP017342 | XM_008365099 |
| PCP017353 | 8,797661526 | 8,872428639 | 8,886702554 | 8,632995197 | PCP017353 | XM_008371771 |
| PCP017355 | 7,417852515 | 7,392317423 | 7,584962501 | 8,603626345 | PCP017355 | XM_009347357 |

|           |             |             |             |             |           |              |
|-----------|-------------|-------------|-------------|-------------|-----------|--------------|
| PCP017386 | 7,22881869  | 7,499845887 | 7,515699838 | 7,779194046 | PCP017386 | XM_009381184 |
| PCP017395 | 7,709635275 | 7,815895594 | 8,299208018 | 7,641473777 | PCP017395 | XM_009350007 |
| PCP017397 | 6,938638658 | 7,022367813 | 7,235248379 | 7,544346278 | PCP017397 | XM_008342691 |
| PCP017402 | 6,97349648  | 6,961970533 | 7,007531912 | 7,711976642 | PCP017402 | XM_008363442 |
| PCP017427 | 6,648609245 | 6,658211483 | 6,874428132 | 7,400879436 |           |              |
| PCP017437 | 8,463524373 | 8,290018847 | 8,441574774 | 8,827596761 | PCP017437 | XR_527756    |
| PCP017438 | 8,04072808  | 8,141238626 | 7,975389442 | 7,882643049 | PCP017438 | XM_008394178 |
| PCP017440 | 7,153095972 | 7,549438149 | 7,918863237 | 8,078577814 |           |              |
| PCP017448 | 7,510408147 | 7,614709844 | 7,602364826 | 8,186510462 |           |              |
| PCP017451 | 8,274587815 | 8,41502341  | 8,767091963 | 9,242388143 | PCP017451 | XM_009339659 |
| PCP017481 | 8,335390355 | 8,347267018 | 8,317412614 | 8,260543232 | PCP017481 | XM_009343348 |
| PCP017484 | 8,137862104 | 8,139551352 | 8,42488011  | 8,764871591 | PCP017484 | XM_009356941 |
| PCP017485 | 8,318904285 | 8,194756854 | 7,920829209 | 7,577428828 | PCP017485 | XM_018647257 |
| PCP017526 | 6,894817763 | 7,303780748 | 7,21916852  | 7,798763389 | PCP017526 | XM_009340532 |
| PCP017589 | 7,930737338 | 7,952275317 | 7,992485211 | 7,61227877  | PCP017589 | XM_018650315 |
| PCP017591 | 7,824449651 | 7,87036472  | 8,044394119 | 9,021451966 |           |              |
| PCP017595 | 7,044394119 | 7,202907418 | 7,029784146 | 6,754887502 | PCP017595 | XM_018645609 |
| PCP017605 | 6,81159947  | 7,273049587 | 7,667679281 | 8,060695932 | PCP017605 | XM_018644791 |
| PCP017610 | 8,491853096 | 8,32494558  | 8,86727874  | 8,320439548 | PCP017610 | XM_009346733 |
| PCP017615 | 7,651051691 | 6,741466986 | 7,282347131 | 6,95419631  | PCP017615 | XM_009352083 |
| PCP017657 | 7,073284692 | 7,269874722 | 7,037052702 | 6,946379968 | PCP017657 | XM_008384947 |
| PCP017686 | 7,776959347 | 7,617136829 | 7,604886762 | 7,594921715 | PCP017686 | XM_009352395 |
| PCP017721 | 7,677155841 | 7,681800619 | 8,04072808  | 8,731319031 | PCP017721 | XM_009337416 |
| PCP017722 | 6,705010253 | 6,950351762 | 7,607330314 | 7,544346278 |           |              |
| PCP017734 | 8,787902559 | 8,382278171 | 8,412231097 | 8,232037117 | PCP017734 | XM_009353431 |
| PCP017750 | 6,634157606 | 7,282347131 | 7,266786541 | 8,956143797 | PCP017750 | XM_008373542 |
| PCP017758 | 7,080337882 | 7,354646096 | 7,63175911  | 7,845490051 | PCP017758 | XM_009346391 |
| PCP017762 | 8,609806663 | 8,578674597 | 8,273002948 | 8,673591756 | PCP017762 | XM_009346404 |
| PCP017793 | 8,173277373 | 7,888743249 | 7,853808564 | 7,709635275 | PCP017793 | XM_009371487 |
| PCP017808 | 8,191454081 | 7,851749041 | 8,035238993 | 7,979167931 | PCP017808 | XM_009371466 |
| PCP017811 | 8,594959026 | 8,670054263 | 8,74819285  | 9,236803511 | PCP017811 | XM_009371461 |
| PCP017820 | 8,866258916 | 8,849655303 | 8,796591265 | 8,567309664 | PCP017820 | XM_008392419 |
| PCP017830 | 8,294620749 | 8,524855097 | 8,601139355 | 8,792237182 | PCP017830 | XM_009353991 |
| PCP017832 | 7,494495616 | 7,523561956 | 7,745976779 | 8,064311643 | PCP017832 | XM_009353985 |
| PCP017833 | 7,153095972 | 7,395148508 | 7,486473046 | 7,828644274 | PCP017833 | XR_666756    |
| PCP017842 | 7,321928095 | 7,375039431 | 7,711976642 | 7,324900589 | PCP017842 | XM_009353968 |
| PCP017862 | 8,54303182  | 7,958088658 | 8,336863563 | 8,696967526 | PCP017862 | XM_018645065 |
| PCP017875 | 6,820178962 | 6,942514505 | 7,464913269 | 7,291585141 | PCP017875 | XM_008384513 |
| PCP017878 | 7,811663685 | 7,994353437 | 7,92677039  | 7,693486957 | PCP017878 | XM_008367726 |
| PCP017890 | 6,772545519 | 7,156538193 | 7,357552005 | 7,700439718 |           |              |
| PCP017894 | 8,495855027 | 8,648645193 | 8,612241904 | 9,118941073 |           |              |
| PCP017902 | 8,919846558 | 8,431831861 | 8,803065551 | 8,449850215 | PCP017902 | XM_009362683 |
| PCP017943 | 8,075051225 | 8,027905997 | 8,042589623 | 7,960001932 |           |              |
| PCP017946 | 8,22881869  | 8,296136161 | 8,335390355 | 8,159871337 | PCP017946 | XM_018643525 |
| PCP017955 | 7,50247382  | 7,805227956 | 8,141238626 | 8,282300792 |           |              |
| PCP017958 | 7,17990909  | 7,395148508 | 7,50247382  | 7,77036657  | PCP017958 | XM_008382775 |

|           |             |             |             |             |           |              |
|-----------|-------------|-------------|-------------|-------------|-----------|--------------|
| PCP017983 | 7,21916852  | 7,520972191 | 7,426264755 | 7,276124405 |           |              |
| PCP017987 | 8,395191361 | 8,665335917 | 8,557157324 | 8,482485305 | PCP017987 | XM_017333049 |
| PCP017988 | 8,005624549 | 7,916894583 | 8,108524457 | 8,434628228 | PCP017988 | XM_009372927 |
| PCP017990 | 7,491853096 | 7,50247382  | 7,750405521 | 8,022367813 | PCP017990 | XM_009372932 |
| PCP018013 | 7,076815597 | 6,862079387 | 7,251056285 | 7,878541438 | PCP018013 | XM_009368153 |
| PCP018014 | 8,583722152 | 8,611024797 | 8,658211483 | 8,545620932 | PCP018014 | XM_018649646 |
| PCP018040 | 8,770399609 | 8,478446064 | 8,539158811 | 8,501160452 | PCP018040 | XM_009340210 |
| PCP018051 | 8,730198386 | 8,622051819 | 8,779161208 | 8,453970202 | PCP018051 | XM_009373988 |
| PCP018054 | 8,044394119 | 8,156487632 | 8,576181982 | 9,100662339 | PCP018054 | NM_001328811 |
| PCP018055 | 7,557119022 | 7,348728154 | 7,464913269 | 7,251056285 | PCP018055 | XM_018650944 |
| PCP018060 | 8,338379842 | 8,291539098 | 8,479780264 | 8,907882108 |           |              |
| PCP018067 | 8,553322101 | 8,031604721 | 8,555854491 | 8,652235507 |           |              |
| PCP018070 | 8,74819285  | 8,765965634 | 8,62450305  | 8,536558066 | PCP018070 | XM_009374034 |
| PCP018083 | 7,383704292 | 7,260496187 | 7,653418353 | 8,009380767 | PCP018083 | XM_008373564 |
| PCP018084 | 8,753785022 | 8,686500527 | 8,618385502 | 8,589950702 |           |              |
| PCP018086 | 6,914923239 | 7,324900589 | 7,46760555  | 7,607330314 | PCP018086 | XM_008373557 |
| PCP018088 | 8,101555535 | 7,982993575 | 8,201290788 | 8,73470962  |           |              |
| PCP018097 | 7,122362117 | 6,54951516  | 6,86628983  | 7,08395793  | PCP018097 | XM_018651997 |
| PCP018113 | 8,144658243 | 7,95419631  | 7,992485211 | 7,77478706  | PCP018113 | XM_009378987 |
| PCP018127 | 8,885696373 | 8,897845456 | 8,877529547 | 8,577428828 |           |              |
| PCP018133 | 7,44567705  | 7,363433935 | 7,156538193 | 6,80309785  | PCP018133 | XM_009335319 |
| PCP018152 | 8,396604781 | 8,599912842 | 8,851749041 | 8,726797165 | PCP018152 | XM_009359706 |
| PCP018160 | 8,447083226 | 8,265239967 | 8,285402219 | 8,341318667 |           |              |
| PCP018211 | 7,453929061 | 7,456724026 | 7,809478757 | 8,053491515 | PCP018211 | XM_009359684 |
| PCP018214 | 7,950293432 | 7,828644274 | 7,95419631  | 7,839203788 | PCP018214 | XM_009359679 |
| PCP018216 | 8,505136683 | 8,338379842 | 8,567309664 | 8,924812504 | PCP018216 | XM_009359677 |
| PCP018218 | 8,101555535 | 7,732472726 | 7,811663685 | 7,813781191 | PCP018218 | XM_009356960 |
| PCP018230 | 8,113742166 | 7,87036472  | 8,073231127 | 8,522267655 | PCP018230 | XM_009356986 |
| PCP018234 | 7,776959347 | 7,544346278 | 7,622051819 | 7,076815597 | PCP018234 | XM_009352196 |
| PCP018250 | 7,389480771 | 7,163196797 | 7,448488033 | 7,866228001 | PCP018250 | XM_008375347 |
| PCP018262 | 8,409390936 | 8,506486109 | 8,518338423 | 8,440163216 | PCP018262 | XM_008383965 |
| PCP018273 | 7,599912842 | 7,539158811 | 7,309885571 | 7,260496187 | PCP018273 | XM_009370037 |
| PCP018275 | 8,75598914  | 8,562242424 | 8,831845581 | 9,058884672 | PCP018275 | XM_008395043 |
| PCP018278 | 6,763809907 | 6,926829678 | 7,282347131 | 8,051643995 |           |              |
| PCP018284 | 7,779194046 | 7,714245518 | 6,857980995 | 5,403608584 | PCP018284 | XM_008378967 |
| PCP018286 | 7,166615031 | 7,189824559 | 7,330916878 | 7,757089938 | PCP018286 | XM_008349136 |
| PCP018306 | 8,201290788 | 8,127581695 | 8,198052084 | 8,73809226  | PCP018306 | XM_009341187 |
| PCP018330 | 7,763743526 | 7,900866808 | 7,896816753 | 7,688809791 |           |              |
| PCP018333 | 7,497213158 | 6,926829678 | 6,454011343 | 6,772545519 | PCP018333 | XM_008354010 |
| PCP018338 | 7,807354922 | 7,888743249 | 8,075051225 | 8,354602022 |           |              |
| PCP018349 | 6,62935662  | 7,22881869  | 7,018700931 | 7,584962501 | PCP018349 | XM_008373368 |
| PCP018358 | 7,946438456 | 7,434628228 | 7,745976779 | 8,048050866 | PCP018358 | XM_017322866 |
| PCP018365 | 8,130982335 | 7,622051819 | 7,757089938 | 7,809478757 | PCP018365 | XM_009338802 |
| PCP018371 | 7,763743526 | 7,61227877  | 8,171577143 | 7,998139076 | PCP018371 | XM_018646306 |
| PCP018400 | 8,849655303 | 8,723387907 | 8,72904287  | 8,639051236 | PCP018400 | XM_008369265 |
| PCP018403 | 7,312882955 | 7,486473046 | 7,855927425 | 8,8008999   |           |              |

|           |             |             |             |             |           |              |
|-----------|-------------|-------------|-------------|-------------|-----------|--------------|
| PCP018423 | 6,564835417 | 7,22881869  | 6,894817763 | 7,342785837 | PCP018423 | XM_018650035 |
| PCP018449 | 6,599912842 | 6,599912842 | 6,958030641 | 7,324900589 | PCP018449 | XM_009352376 |
| PCP018455 | 8,906890596 | 9,023283079 | 8,762647796 | 8,449850215 | PCP018455 | XM_018651009 |
| PCP018466 | 7,979167931 | 8,403736386 | 8,825499451 | 9,582461918 | PCP018466 | XM_009374359 |
| PCP018485 | 7,90285744  | 7,857980995 | 8,058911723 | 8,3994702   | PCP018485 | XM_018643249 |
| PCP018502 | 6,634157606 | 6,984931073 | 7,199672345 | 8,576181982 | PCP018502 | XM_009340709 |
| PCP018509 | 7,437377568 | 7,499845887 | 7,783522135 | 7,44567705  | PCP018509 | XM_008371846 |
| PCP018515 | 8,136119594 | 8,125826717 | 8,336863563 | 8,740354199 |           |              |
| PCP018530 | 8,718806834 | 8,589950702 | 8,686500527 | 9,213517401 | PCP018530 | XM_009361212 |
| PCP018549 | 8,640244936 | 8,336863563 | 8,348728154 | 8,458078458 | PCP018549 | XM_009336804 |
| PCP018554 | 7,011227255 | 7,129283017 | 7,336908182 | 7,843418611 | PCP018554 | XM_008384109 |
| PCP018562 | 6,714245518 | 6,759289016 | 7,222360218 | 7,395148508 | PCP018562 | XM_009347259 |
| PCP018576 | 7,437377568 | 7,577428828 | 8,035238993 | 7,975389442 | PCP018576 | XM_009376701 |
| PCP018604 | 8,456682963 | 8,364878797 | 8,569855608 | 8,97441459  | PCP018604 | XM_008353409 |
| PCP018610 | 7,321928095 | 7,459431619 | 7,584962501 | 7,942514505 | PCP018610 | XM_018648886 |
| PCP018614 | 9,066977144 | 8,847589839 | 8,540438054 | 8,238404739 |           |              |
| PCP018624 | 8,48651327  | 8,514398461 | 8,79983204  | 9,005624549 |           |              |
| PCP018635 | 7,539158811 | 7,42063398  | 7,730164413 | 8,078577814 |           |              |
| PCP018642 | 8,031604721 | 8,19313106  | 8,254225537 | 8,628153873 | PCP018642 | XM_009366009 |
| PCP018646 | 6,86628983  | 7,062531903 | 7,118941073 | 6,695854658 | PCP018646 | XM_009343613 |
| PCP018647 | 7,589988142 | 7,718841075 | 7,626950122 | 7,539158811 | PCP018647 | XM_009343612 |
| PCP018650 | 7,206232954 | 7,266786541 | 7,483815777 | 7,88062431  | PCP018650 | XM_017329461 |
| PCP018657 | 8,363390129 | 8,398016818 | 8,357552005 | 8,936637939 | PCP018657 | XM_009363783 |
| PCP018666 | 7,186559982 | 7,497213158 | 7,843418611 | 8,183238369 | PCP018666 | XM_009366181 |
| PCP018670 | 8,28692734  | 8,395191361 | 8,549476655 | 8,782441329 |           |              |
| PCP018692 | 7,518299077 | 7,351645995 | 7,375039431 | 7,073284692 | PCP018692 | XR_667777    |
| PCP018700 | 7,878541438 | 8,106798463 | 8,154818109 | 8,459431619 | PCP018700 | XM_009362721 |
| PCP018705 | 8,470333494 | 8,321928095 | 8,06608919  | 7,442943496 |           |              |
| PCP018726 | 7,768184325 | 7,681800619 | 7,826548487 | 8,430452552 | PCP018726 | XM_009373402 |
| PCP018736 | 7,87036472  | 7,398059585 | 7,456724026 | 7,470292816 | PCP018736 | XM_009367146 |
| PCP018742 | 8,046196362 | 8,291539098 | 8,46760555  | 9,055282436 | PCP018742 | XM_009380290 |
| PCP018752 | 8,332394659 | 8,360495967 | 8,451211112 | 8,80841723  | PCP018752 | XM_009343793 |
| PCP018756 | 8,024197765 | 7,928784831 | 8,153146652 | 8,576181982 | PCP018756 | XM_009381383 |
| PCP018770 | 8,344295908 | 8,3994702   | 8,652235507 | 9,078604498 | PCP018770 | XM_008375544 |
| PCP018771 | 8,709669735 | 8,659389441 | 8,740354199 | 9,105044204 |           |              |
| PCP018787 | 8,317412614 | 7,725673    | 7,686500527 | 7,822284016 |           |              |
| PCP018819 | 7,736943052 | 7,483815777 | 7,98111057  | 7,824449651 | PCP018819 | XM_009352191 |
| PCP018836 | 7,403693786 | 7,670089681 | 7,822284016 | 8,293103743 |           |              |
| PCP018847 | 8,204571144 | 8,051643995 | 7,916894583 | 7,757089938 | PCP018847 | XM_009343801 |
| PCP018861 | 7,372168569 | 7,459431619 | 8,273002948 | 11,07748336 | PCP018861 | XM_009345692 |
| PCP018890 | 6,988684687 | 7,212666605 | 7,510408147 | 9,994353437 | PCP018890 | XM_009337573 |
| PCP018891 | 7,928784831 | 8,048050866 | 8,206184105 | 8           | PCP018891 | XM_009337572 |
| PCP018894 | 8,554588852 | 8,70158371  | 8,862110391 | 8,686500527 | PCP018894 | XM_008368671 |
| PCP018936 | 7,528805707 | 7,263691734 | 7,470292816 | 7,853808564 | PCP018936 | XM_008393284 |
| PCP018961 | 7,22881869  | 6,81159947  | 6,906890596 | 7,014913158 |           |              |
| PCP018975 | 7,878541438 | 7,61227877  | 8,075051225 | 7,847558521 | PCP018975 | XM_009344414 |

|           |             |             |             |             |           |              |
|-----------|-------------|-------------|-------------|-------------|-----------|--------------|
| PCP018985 | 8,805195705 | 8,479780264 | 8,528766645 | 8,392317423 |           |              |
| PCP018989 | 7,886733033 | 7,634230226 | 7,828644274 | 7,602364826 | PCP018989 | XM_009342622 |
| PCP018993 | 8,320439548 | 7,695785075 | 8,212715235 | 7,674757228 | PCP018993 | XM_009369234 |
| PCP019020 | 8,583722152 | 8,018645301 | 8,606109055 | 8,536558066 |           |              |
| PCP019021 | 7,533952624 | 7,494495616 | 7,71651083  | 8,053491515 | PCP019021 | XM_009380571 |
| PCP019022 | 8,379378367 | 8,169925001 | 8,255831156 | 8,254225537 | PCP019022 | XM_009355656 |
| PCP019039 | 8,494535617 | 8,540438054 | 8,716545126 | 9,436024381 | PCP019039 | XM_009354331 |
| PCP019040 | 6,777025123 | 6,977279923 | 7,667679281 | 7,007531912 | PCP019040 | XM_008353585 |
| PCP019160 | 8,62935662  | 8,693486957 | 8,466260038 | 7,936637939 |           |              |
| PCP019182 | 7,142923928 | 7,577428828 | 8,048050866 | 8,487840034 | PCP019182 | XM_018650006 |
| PCP019199 | 7,46760555  | 7,700439718 | 7,990557838 | 8,485145023 | PCP019199 | XM_009358618 |
| PCP019255 | 7,986809101 | 8,005624549 | 7,977279923 | 7,634230226 | PCP019255 | XM_018645710 |
| PCP019261 | 7,95419631  | 7,930737338 | 7,938579853 | 7,559721231 | PCP019261 | XM_018645710 |
| PCP019269 | 8,166564822 | 7,918863237 | 8,186510462 | 8,44431092  | PCP019269 | XM_009355068 |
| PCP019273 | 4,938756261 | 6,094447222 | 7,71651083  | 10,81404566 | PCP019273 | XM_009355064 |
| PCP019297 | 7,139551352 | 7,17990909  | 6,832890014 | 6,579994693 |           |              |
| PCP019298 | 7,886733033 | 7,787902559 | 7,841281284 | 8,487840034 | PCP019298 | XM_008244726 |
| PCP019307 | 7,470292816 | 6,662917555 | 7,400879436 | 6,47037417  |           |              |
| PCP019313 | 8,6794801   | 8,923832563 | 8,528766645 | 8,265239967 | PCP019313 | XM_018647929 |
| PCP019314 | 7,451211112 | 7,212666605 | 7,315874125 | 7,073284692 |           |              |
| PCP019315 | 6,902917719 | 7,291585141 | 6,902917719 | 6,686500527 | PCP019315 | XM_009360176 |
| PCP019319 | 7,196430001 | 7,380850638 | 7,186559982 | 6,653490009 | PCP019319 | XM_008396101 |
| PCP019327 | 7,351645995 | 7,247927513 | 7,730164413 | 6,857980995 | PCP019327 | XM_017327517 |
| PCP019336 | 8,151422517 | 8,178266468 | 8,076815597 | 7,950293432 | PCP019336 | XM_009360127 |
| PCP019345 | 7,273049587 | 7,196430001 | 7,437377568 | 7,763743526 |           |              |
| PCP019376 | 8,293103743 | 8,21916852  | 8,28692734  | 8,716545126 | PCP019376 | XM_009372542 |
| PCP019410 | 7,614709844 | 7,709635275 | 7,602364826 | 7,518299077 |           |              |
| PCP019412 | 7,900866808 | 7,672425342 | 6,961970533 | 6,196331634 | PCP019412 | XM_009377164 |
| PCP019413 | 7,389480771 | 7,122362117 | 7,577428828 | 7,257387843 | PCP019413 | XM_009377165 |
| PCP019422 | 7,122362117 | 7,269874722 | 7,626950122 | 7,554588852 | PCP019422 | XM_009377174 |
| PCP019427 | 7,64385619  | 7,567347696 | 7,448488033 | 7,440204752 |           |              |
| PCP019441 | 8,042589623 | 7,930737338 | 7,975389442 | 8,694636474 | PCP019441 | XM_009339439 |
| PCP019450 | 8,787902559 | 8,743723645 | 8,751544059 | 8,660602089 | PCP019450 | XM_009339310 |
| PCP019464 | 8,494535617 | 8,354602022 | 8,581200582 | 8,999069838 |           |              |
| PCP019479 | 8,703903573 | 8,514398461 | 8,781359714 | 9,108524457 | PCP019479 | XM_009377673 |
| PCP019483 | 8,022367813 | 8,247927513 | 8,110248388 | 8,042589623 | PCP019483 | XM_017333273 |
| PCP019489 | 7,730164413 | 7,136170875 | 6,426264755 | 6,624539604 | PCP019489 | XM_009377656 |
| PCP019499 | 8,003770871 | 7,866228001 | 7,888743249 | 7,639015048 |           |              |
| PCP019500 | 7,118941073 | 7,238404739 | 7,183188734 | 6,781359714 | PCP019500 | XM_009377635 |
| PCP019509 | 7,383704292 | 7,655852677 | 8,186510462 | 8,545620932 | PCP019509 | XM_008378845 |
| PCP019511 | 7,499845887 | 7,312882955 | 7,912889336 | 8,062477937 | PCP019511 | XM_008378988 |
| PCP019527 | 6,599912842 | 6,380764075 | 6,886672074 | 7,761551232 |           |              |
| PCP019537 | 8,888743249 | 8,514398461 | 8,277659361 | 7,910912508 | PCP019537 | XM_008378904 |
| PCP019548 | 7,473056289 | 7,132679654 | 7,499845887 | 7,818070833 |           |              |
| PCP019563 | 6,81159947  | 6,958030641 | 7,08395793  | 7,481153605 |           |              |
| PCP019574 | 8,139551352 | 8,096293483 | 8,106798463 | 7,779194046 | PCP019574 | XM_009372479 |

|           |             |             |             |             |           |              |
|-----------|-------------|-------------|-------------|-------------|-----------|--------------|
| PCP019577 | 8,548166865 | 8,503825738 | 8,434628228 | 8,453970202 | PCP019577 | XM_009372503 |
| PCP019588 | 8,400879436 | 7,988684687 | 8,057071136 | 7,928784831 | PCP019588 | XM_009365724 |
| PCP019600 | 7,291585141 | 8,112022407 | 7,74819285  | 8,385129006 | PCP019600 | XM_009365707 |
| PCP019603 | 7,874489611 | 7,868328714 | 8,049848549 | 8,434628228 | PCP019603 | XM_009364311 |
| PCP019614 | 7,888743249 | 8,129283017 | 8,667714757 | 9,150585062 |           |              |
| PCP019616 | 8,317412614 | 8,422064766 | 8,466260038 | 8,062477937 | PCP019616 | XM_009367176 |
| PCP019629 | 8,447083226 | 8,511752654 | 8,73809226  | 9,098032083 |           |              |
| PCP019637 | 6,996275749 | 7,173227395 | 7,139551352 | 6,459431619 | PCP019637 | XM_008357526 |
| PCP019645 | 8,473015688 | 8,263644792 | 8,503825738 | 8,306836389 | PCP019645 | XM_009339553 |
| PCP019649 | 8,220765252 | 7,763743526 | 7,617136829 | 6,977279923 | PCP019649 | XM_009336173 |
| PCP019672 | 7,372168569 | 7,557119022 | 7,670089681 | 7,994353437 | PCP019672 | XM_009357508 |
| PCP019673 | 8,806291831 | 8,680640826 | 8,631795481 | 8,246360579 |           |              |
| PCP019677 | 8,654636029 | 8,553322101 | 8,622051819 | 8,48651327  | PCP019677 | XM_009357518 |
| PCP019693 | 8,303780748 | 8,271463028 | 8,225593068 | 7,727920455 | PCP019693 | XM_009357616 |
| PCP019712 | 8,022367813 | 8,016808288 | 7,898873426 | 7,686500527 |           |              |
| PCP019720 | 8,266786541 | 8,372125027 | 8,489165579 | 8,845490051 | PCP019720 | XM_009342996 |
| PCP019769 | 8,279239123 | 8,201290788 | 8,154818109 | 8,659389441 | PCP019769 | XM_009360867 |
| PCP019795 | 7,094552786 | 6,84962403  | 7,101503009 | 6,60481265  | PCP019795 | XM_017326043 |
| PCP019797 | 7,853808564 | 7,641473777 | 8,113742166 | 8,56350137  | PCP019797 | XM_009354635 |
| PCP019800 | 8,388017285 | 8,375039431 | 8,473015688 | 9,224001674 | PCP019800 | XM_009354638 |
| PCP019819 | 8,110248388 | 8,224001674 | 8,390899794 | 8,61717357  | PCP019819 | XM_008366830 |
| PCP019824 | 7,961912672 | 7,641473777 | 7,62935662  | 7,285402219 | PCP019824 | XM_018642625 |
| PCP019833 | 8,033423002 | 7,700439718 | 7,886733033 | 8,209453366 | PCP019833 | XM_009335617 |
| PCP019849 | 7,238404739 | 7,497213158 | 7,820178962 | 8,174925683 | PCP019849 | XM_008375761 |
| PCP019866 | 6,648609245 | 6,890811455 | 7,132679654 | 7,412188747 |           |              |
| PCP019869 | 7,156538193 | 7,193081765 | 7,982993575 | 8,571107931 | PCP019869 | XM_009380418 |
| PCP019870 | 8,732438807 | 8,64385619  | 8,70276142  | 9,084808388 | PCP019870 | XM_008347011 |
| PCP019884 | 7,714245518 | 7,914863459 | 8,022367813 | 8,438791853 | PCP019884 | XM_009336394 |
| PCP019897 | 7,351645995 | 7,434628228 | 7,363433935 | 7,17990909  | PCP019897 | XM_009381198 |
| PCP019899 | 7,965784285 | 7,886733033 | 8,181549844 | 8,430452552 | PCP019899 | XM_009346068 |
| PCP019917 | 7,297649983 | 7,139551352 | 7,21916852  | 6,984931073 | PCP019917 | XM_009336001 |
| PCP019920 | 7,456724026 | 7,531381461 | 7,890750668 | 8,276124405 | PCP019920 | XM_017336911 |
| PCP019940 | 8,302273349 | 8,403736386 | 8,360495967 | 8,32494558  | PCP019940 | XM_009352207 |
| PCP019944 | 7,026025399 | 7,440204752 | 7,321928095 | 7,681800619 | PCP019944 | XM_018652200 |
| PCP019945 | 8,007475849 | 7,950293432 | 7,996219247 | 7,847558521 |           |              |
| PCP019950 | 8,174925683 | 8,105018005 | 8,069691427 | 7,952275317 | PCP019950 | XM_009367512 |
| PCP019959 | 8,132731056 | 8,173277373 | 8,112022407 | 8,076815597 |           |              |
| PCP019974 | 7,900866808 | 7,727920455 | 7,956114749 | 8,515699838 | PCP019974 | XM_009374641 |
| PCP019975 | 8,018645301 | 7,832890014 | 7,874489611 | 8,390899794 |           |              |
| PCP019982 | 9,361220052 | 9,369226538 | 8,268331458 | 7,285402219 | PCP019982 | XM_009372216 |
| PCP019988 | 8,436003553 | 8,098032083 | 8,239980333 | 8,753785022 |           |              |
| PCP020005 | 7,851749041 | 8,207844058 | 8,569855608 | 9,004698008 | PCP020005 | XM_009355590 |
| PCP020012 | 8,323415108 | 8,73470962  | 8,736976865 | 8,813781191 | PCP020012 | XM_009355598 |
| PCP020019 | 8,61717357  | 8,596189756 | 8,591223118 | 8,471675214 |           |              |
| PCP020034 | 7,860031646 | 7,691185174 | 8,225593068 | 8,300718622 | PCP020034 | XM_008354444 |
| PCP020036 | 7,589988142 | 7,815895594 | 8,057071136 | 8,06608919  | PCP020036 | XM_009345972 |

|           |             |             |             |             |           |              |
|-----------|-------------|-------------|-------------|-------------|-----------|--------------|
| PCP020042 | 7,400879436 | 7,257387843 | 8,020535537 | 7,677155841 | PCP020042 | XM_009335421 |
| PCP020054 | 8,470333494 | 8,339850003 | 8,178266468 | 8,305286574 |           |              |
| PCP020064 | 7,285402219 | 7,531381461 | 7,453929061 | 8,494535617 | PCP020064 | XM_009339826 |
| PCP020071 | 8,407989993 | 8,112022407 | 8,493174961 | 8,824417827 | PCP020071 | XM_009355947 |
| PCP020073 | 6,841344192 | 7,321928095 | 7,406587689 | 7,489205728 | PCP020073 | XM_009355942 |
| PCP020093 | 6,845490051 | 7,215969746 | 7,395148508 | 7,342785837 | PCP020093 | XM_009350321 |
| PCP020111 | 8,183238369 | 8,412231097 | 8,526186214 | 8,859006685 | PCP020111 | XM_009351281 |
| PCP020134 | 7,014913158 | 7,040782866 | 6,894817763 | 6,658211483 | PCP020134 | XM_009355408 |
| PCP020183 | 6,894817763 | 6,609843592 | 6,807354922 | 7,294620749 | PCP020183 | XM_008367646 |
| PCP020188 | 7,759355602 | 7,572359168 | 7,952275317 | 8,112022407 | PCP020188 | XM_008367712 |
| PCP020201 | 7,073284692 | 7,058857621 | 7,324900589 | 6,754887502 | PCP020201 | XM_009366551 |
| PCP020203 | 8,120652609 | 8,252665432 | 8,293103743 | 8,63542792  | PCP020203 | XM_009366509 |
| PCP020205 | 7,386552314 | 7,122362117 | 7,700439718 | 7,707359132 | PCP020205 | XM_009338109 |
| PCP020213 | 7,969645536 | 7,878541438 | 7,87036472  | 7,741466986 | PCP020213 | XM_009364897 |
| PCP020218 | 8,122413888 | 7,857980995 | 7,969645536 | 6,345715709 | PCP020218 | XM_018649093 |
| PCP020221 | 7,260496187 | 7,101503009 | 7,499845887 | 7,033423002 | PCP020221 | XM_018645877 |
| PCP020253 | 7,412188747 | 7,300764373 | 7,189824559 | 7,087462841 |           |              |
| PCP020254 | 8,851749041 | 8,224001674 | 7,832890014 | 8,120652609 | PCP020254 | XM_008347812 |
| PCP020270 | 7,592457037 | 7,900866808 | 7,874489611 | 8,19313106  |           |              |
| PCP020281 | 8,046196362 | 7,948367232 | 7,772611496 | 8,129283017 |           |              |
| PCP020282 | 7,42063398  | 7,30679083  | 7,473056289 | 7,942514505 | PCP020282 | XM_009364671 |
| PCP020283 | 7,386552314 | 7,369204723 | 8,055282436 | 9,980610876 | PCP020283 | XR_001953603 |
| PCP020288 | 8,434628228 | 8,50779464  | 8,522267655 | 8,412231097 | PCP020288 | XM_009367542 |
| PCP020319 | 7,285402219 | 7,412188747 | 7,634230226 | 7,975389442 |           |              |
| PCP020320 | 7,658211483 | 7,118941073 | 8,265239967 | 8,124121312 | PCP020320 | XM_009368912 |
| PCP020330 | 7,122362117 | 7,266786541 | 7,372168569 | 8,035238993 |           |              |
| PCP020333 | 8,305286574 | 8,463524373 | 8,493174961 | 8,427648072 |           |              |
| PCP020359 | 7,822284016 | 8,082149041 | 7,684187561 | 7,709635275 | PCP020359 | XM_009379812 |
| PCP020360 | 7,839203788 | 8           | 7,98111057  | 8,356099782 |           |              |
| PCP020369 | 7,222360218 | 7,426264755 | 7,475733431 | 7,860031646 | PCP020369 | XM_009344458 |
| PCP020416 | 7,636624621 | 7,641473777 | 8,082149041 | 8,806291831 | PCP020416 | XM_009355337 |
| PCP020421 | 7,969645536 | 7,855927425 | 7,594921715 | 7,282347131 | PCP020421 | XM_008394087 |
| PCP020447 | 8,112022407 | 8,06608919  | 7,98111057  | 8,523561956 | PCP020447 | XM_009380457 |
| PCP020476 | 8,710806434 | 8,685344507 | 8,880593701 | 8,589950702 |           |              |
| PCP020492 | 8,511752654 | 8,636624621 | 8,843387202 | 8,372125027 | PCP020492 | XM_009345784 |
| PCP020497 | 7,044394119 | 7,369204723 | 7,62935662  | 8,246360579 | PCP020497 | XM_008377714 |
| PCP020508 | 7,440204752 | 7,122362117 | 7,108524457 | 6,254178286 | PCP020508 | XM_009361526 |
| PCP020509 | 8,566054038 | 8,366322214 | 8,591223118 | 8,877529547 | PCP020509 | XM_009345265 |
| PCP020522 | 6,772545519 | 6,965784285 | 7,139551352 | 7,536596918 | PCP020522 | XM_018643677 |
| PCP020532 | 6,714245518 | 6,841344192 | 7,30679083  | 8,623259662 | PCP020532 | XM_009369231 |
| PCP020546 | 6,902917719 | 6,497133304 | 7,266786541 | 7,076815597 | PCP020546 | XM_009368848 |
| PCP020547 | 7,513095909 | 7,291585141 | 7,470292816 | 7,007531912 | PCP020547 | XM_008359956 |
| PCP020565 | 7,101503009 | 7,470292816 | 7,582480735 | 8,071462363 | PCP020565 | XM_008379525 |
| PCP020582 | 8,103287808 | 7,796558821 | 7,824449651 | 7,783522135 |           |              |
| PCP020662 | 7,878541438 | 7,754887502 | 7,464913269 | 7,523561956 |           |              |
| PCP020666 | 7,423494135 | 7,533952624 | 8,361943774 | 8,173277373 | PCP020666 | XM_008377166 |

|           |             |             |             |             |           |              |
|-----------|-------------|-------------|-------------|-------------|-----------|--------------|
| PCP020695 | 7,451211112 | 7,28845085  | 7,28845085  | 7,011227255 | PCP020695 | XM_009362776 |
| PCP020729 | 7,928784831 | 7,667679281 | 7,691185174 | 7,74819285  | PCP020729 | XM_009365689 |
| PCP020752 | 6,639087423 | 7,363433935 | 7,285402219 | 7,478405614 | PCP020752 | XM_008339325 |
| PCP020844 | 7,973439079 | 7,526147081 | 8,044394119 | 7,554588852 | PCP020844 | XM_009336822 |
| PCP020857 | 6,609843592 | 7,417852515 | 7,619633096 | 9,332417038 | PCP020857 | XM_009381263 |
| PCP020880 | 8,283875484 | 8,220765252 | 8,243173983 | 7,934693407 | PCP020880 | XM_009377779 |
| PCP020885 | 6,454011343 | 6,961970533 | 6,988684687 | 8,269921462 | PCP020885 | XM_009376843 |
| PCP020887 | 7,266786541 | 7,77036657  | 7,892816    | 8,198052084 | PCP020887 | XM_009376744 |
| PCP020901 | 7,589988142 | 7,46760555  | 7,648681141 | 8,108524457 | PCP020901 | XM_008365901 |
| PCP020904 | 8,212715235 | 7,725673    | 7,807354922 | 7,569855608 | PCP020904 | XM_018651155 |
| PCP020915 | 6,599912842 | 6,454011343 | 6,695854658 | 8,146339557 | PCP020915 | XM_008390828 |
| PCP020916 | 8,273002948 | 8,156487632 | 8,174925683 | 8,035238993 | PCP020916 | XM_017326527 |
| PCP020918 | 7,83080039  | 8,071462363 | 8,41502341  | 9,002815016 | PCP020918 | XM_008390833 |
| PCP020941 | 7,624466495 | 7,8008999   | 8,178266468 | 9,001886668 |           |              |
| PCP020968 | 7,92677039  | 7,890750668 | 7,952275317 | 7,723353774 | PCP020968 | XM_008361796 |
| PCP020975 | 7,557119022 | 7,426264755 | 7,677155841 | 8,254225537 | PCP020975 | XM_009373291 |
| PCP020980 | 7,695785075 | 7,273049587 | 7,383704292 | 7,011227255 | PCP020980 | XM_018651400 |
| PCP020987 | 8,055282436 | 8,254225537 | 8,885696373 | 9,849139214 | PCP020987 | XM_018651392 |
| PCP020991 | 8,696967526 | 8,514398461 | 8,783554874 | 9,207819661 |           |              |
| PCP021002 | 8,44431092  | 8,302273349 | 8,470333494 | 8,364878797 |           |              |
| PCP021004 | 8,014968933 | 7,884658968 | 7,862141394 | 7,279192684 | PCP021004 | XM_018651878 |
| PCP021005 | 7,125878364 | 6,910852562 | 7,007531912 | 6,50255338  | PCP021005 | XM_008339955 |
| PCP021006 | 7,815895594 | 7,453929061 | 7,602364826 | 7,597456684 | PCP021006 | XM_009378179 |
| PCP021014 | 8,586201784 | 8,297695831 | 8,54689446  | 8,35169016  | PCP021014 | XM_009360723 |
| PCP021022 | 6,828707735 | 6,700439718 | 6,667750232 | 7,684187561 |           |              |
| PCP021041 | 7,866228001 | 7,967687386 | 7,973439079 | 8,628153873 | PCP021041 | XM_009351243 |
| PCP021061 | 6,667750232 | 6,64385619  | 7,044394119 | 7,518299077 |           |              |
| PCP021105 | 7,176621973 | 7,459431619 | 7,076815597 | 6,969587981 |           |              |
| PCP021112 | 8,370687407 | 8,524855097 | 8,882643049 | 9,258165557 |           |              |
| PCP021122 | 7,634230226 | 7,648681141 | 7,579919292 | 7,389480771 | PCP021122 | XM_009365499 |
| PCP021127 | 6,624539604 | 6,420718183 | 7,098032083 | 8,856954575 | PCP021127 | XM_009365506 |
| PCP021130 | 8,583722152 | 8,74708524  | 8,84024291  | 9,110274492 |           |              |
| PCP021137 | 8,075051225 | 8,166564822 | 8,255831156 | 8,626913629 |           |              |
| PCP021142 | 6,977279923 | 7,577428828 | 8,048050866 | 7,783522135 | PCP021142 | XM_009365602 |
| PCP021143 | 7,251056285 | 7,448488033 | 7,528805707 | 7,979167931 | PCP021143 | NM_001302302 |
| PCP021145 | 8,204571144 | 8,296136161 | 7,574934058 | 7,486473046 | PCP021145 | XM_018649055 |
| PCP021159 | 7,910912508 | 7,932687205 | 7,928784831 | 7,582480735 | PCP021159 | XM_009337262 |
| PCP021160 | 8,537878433 | 8,537878433 | 8,37794796  | 8,413627929 |           |              |
| PCP021175 | 7,244791942 | 7,426264755 | 7,587440004 | 8,078577814 | PCP021175 | XM_009337232 |
| PCP021179 | 6,977279923 | 6,958030641 | 7,300764373 | 6,914923239 | PCP021179 | XM_009337227 |
| PCP021184 | 7,176621973 | 6,922792504 | 6,958030641 | 6,64385619  | PCP021184 | XM_009375029 |
| PCP021193 | 7,971543554 | 7,761551232 | 7,763743526 | 7,872397856 | PCP021193 | XM_009344297 |
| PCP021203 | 7,159871337 | 7,007531912 | 7,619633096 | 9,11113567  | PCP021203 | XM_008389050 |
| PCP021207 | 8,417852515 | 8,306836389 | 8,356099782 | 8,939579214 | PCP021207 | XM_008389077 |
| PCP021209 | 6,129283017 | 6,820178962 | 7,809478757 | 7,636624621 | PCP021209 | XM_017327502 |
| PCP021222 | 6,648609245 | 6,705010253 | 7,033423002 | 7,54689446  | PCP021222 | XM_008389190 |



|           |             |             |             |             |           |              |
|-----------|-------------|-------------|-------------|-------------|-----------|--------------|
| PCP021228 | 7,979167931 | 8,188193194 | 7,888743249 | 7,761551232 |           |              |
| PCP021239 | 8,060695932 | 8,027905997 | 8,198052084 | 8,583722152 |           |              |
| PCP021241 | 7,988684687 | 8           | 8,016808288 | 7,896816753 |           |              |
| PCP021251 | 7,434628228 | 7,50779464  | 7,670089681 | 8,255831156 | PCP021251 | XM_008373345 |
| PCP021259 | 8,051643995 | 8,309840108 | 8,659389441 | 9,098032083 | PCP021259 | XM_008365963 |
| PCP021260 | 7,470292816 | 8,087462841 | 7,864186145 | 7,686500527 | PCP021260 | XM_008365964 |
| PCP021261 | 7,594921715 | 8,146339557 | 7,8008999   | 7,73470962  | PCP021261 | XM_017332465 |
| PCP021293 | 8,452570726 | 8,188193194 | 8,518338423 | 8,68183575  | PCP021293 | XM_008342383 |
| PCP021301 | 7,857980995 | 7,98111057  | 8,163247124 | 8,63542792  | PCP021301 | XM_009378842 |
| PCP021306 | 7,533952624 | 7,783522135 | 8,191454081 | 9,098900598 | PCP021306 | XM_009378839 |
| PCP021314 | 7,969645536 | 7,95419631  | 8,011227255 | 8,413627929 | PCP021314 | XM_009378827 |
| PCP021321 | 8,225593068 | 8,214319121 | 8,39373366  | 8,830768706 | PCP021321 | XM_009345583 |
| PCP021331 | 6,981053471 | 6,882643049 | 6,926829678 | 8,027905997 | PCP021331 | XM_009345670 |
| PCP021332 | 8,470333494 | 8,717676423 | 8,699294818 | 9,121533517 |           |              |
| PCP021339 | 7,044394119 | 7,125878364 | 7,28845085  | 7,709635275 |           |              |
| PCP021340 | 8,19313106  | 7,884658968 | 8,003770871 | 7,494495616 |           |              |
| PCP021348 | 7,333870928 | 7,552054236 | 7,963878669 | 8,380807357 | PCP021348 | XM_008377315 |
| PCP021385 | 7,942514505 | 7,986809101 | 8,076815597 | 8,452570726 | PCP021385 | XM_008384193 |
| PCP021409 | 8,583722152 | 8,601139355 | 8,810571635 | 9,227206781 |           |              |
| PCP021412 | 8,46760555  | 8,482485305 | 8,583722152 | 9,121533517 | PCP021412 | XM_009346001 |
| PCP021436 | 7,714245518 | 7,74819285  | 7,63175911  | 7,351645995 |           |              |
| PCP021458 | 8,332394659 | 8,406545173 | 8,566054038 | 8,895817605 |           |              |
| PCP021460 | 8,827596761 | 8,727920455 | 8,89684702  | 8,764871591 | PCP021460 | XM_008340329 |
| PCP021461 | 6,798698597 | 6,914923239 | 7,318949464 | 7,779194046 |           |              |
| PCP021468 | 6,741466986 | 6,72342204  | 7,018700931 | 7,483815777 |           |              |
| PCP021484 | 7,285402219 | 7,714245518 | 8,048050866 | 8,537878433 | PCP021484 | XM_008388933 |
| PCP021486 | 8,730198386 | 8,790087794 | 8,73809226  | 8,566054038 | PCP021486 | XM_008364807 |
| PCP021488 | 7,63175911  | 7,193081765 | 8,073231127 | 8,620842965 | PCP021488 | XM_009372431 |
| PCP021504 | 6,918863237 | 6,790120385 | 6,695854658 | 7,351645995 | PCP021504 | XM_009372133 |
| PCP021511 | 7,08395793  | 7,442943496 | 7,406587689 | 7,98111057  | PCP021511 | XM_009370440 |
| PCP021516 | 7,888743249 | 8,290018847 | 7,967687386 | 8,265239967 | PCP021516 | XM_009341163 |
| PCP021559 | 7,888743249 | 8,108524457 | 8,132731056 | 8,520932916 |           |              |
| PCP021572 | 7,040782866 | 7,312882955 | 7,132679654 | 6,691115365 |           |              |
| PCP021582 | 7,707359132 | 7,792269724 | 8,053491515 | 8,962896005 |           |              |
| PCP021588 | 7,599912842 | 7,651051691 | 8,101555535 | 8,772578508 | PCP021588 | XM_009340157 |
| PCP021604 | 7,677155841 | 7,908872939 | 8,022367813 | 8,345760055 | PCP021604 | XM_009349014 |
| PCP021606 | 7,98111057  | 7,888743249 | 8,103287808 | 8,510447709 | PCP021606 | XM_008345086 |
| PCP021612 | 8,159871337 | 7,483815777 | 7,206232954 | 6,497133304 | PCP021612 | XM_018651931 |
| PCP021619 | 7,557119022 | 7,847558521 | 8,215921225 | 8,658211483 |           |              |
| PCP021645 | 7,845490051 | 7,779194046 | 7,958088658 | 8,305286574 | PCP021645 | XM_009377302 |
| PCP021651 | 6,409390936 | 6,686500527 | 7,928784831 | 7,098032083 | PCP021651 | XM_008382199 |
| PCP021671 | 7,08395793  | 7,279192684 | 7,417852515 | 7,986809101 | PCP021671 | XM_008369499 |
| PCP021684 | 7,011227255 | 6,824386003 | 7,342785837 | 7,544346278 | PCP021684 | XM_018647054 |
| PCP021685 | 8,555854491 | 8,714245518 | 8,62935662  | 9,059804103 | PCP021685 | XM_018647053 |
| PCP021692 | 8,035238993 | 8,330916878 | 8,675957033 | 8,619596417 | PCP021692 | XM_008357078 |
| PCP021699 | 7,011227255 | 6,95419631  | 7,062531903 | 7,864186145 |           |              |

|           |             |             |             |             |           |              |
|-----------|-------------|-------------|-------------|-------------|-----------|--------------|
| PCP021716 | 8,883651361 | 9,032514148 | 8,615923847 | 8,122413888 | PCP021716 | XM_009345262 |
| PCP021718 | 8,007475849 | 8,087462841 | 8,294620749 | 8,493174961 |           |              |
| PCP021724 | 7,866228001 | 7,672425342 | 7,743689989 | 8,412231097 |           |              |
| PCP021727 | 8,082149041 | 8,265239967 | 8,364878797 | 8,665335917 | PCP021727 | XM_017333361 |
| PCP021731 | 8,189824559 | 7,607330314 | 7,702726796 | 7,597456684 | PCP021731 | XM_008354953 |
| PCP021735 | 7,451211112 | 7,785746699 | 7,74819285  | 8,035238993 | PCP021735 | XM_009368500 |
| PCP021756 | 8,103287808 | 7,98111057  | 8,251103639 | 8,545620932 | PCP021756 | XM_008384098 |
| PCP021783 | 7,609769734 | 7,841281284 | 7,946438456 | 8,326429487 | PCP021783 | XM_009366239 |
| PCP021786 | 8,45532722  | 8,438791853 | 8,392317423 | 8,113742166 |           |              |
| PCP021794 | 7,741466986 | 8,41079052  | 8,300718622 | 8,764871591 | PCP021794 | XM_009364861 |
| PCP021808 | 6,785681319 | 7,17990909  | 7,21916852  | 7,494495616 | PCP021808 | XM_008357444 |
| PCP021819 | 8,189824559 | 8,246360579 | 8,407989993 | 8,249492747 | PCP021819 | XM_008363703 |
| PCP021823 | 8,715378619 | 8,626913629 | 8,780277286 | 9,159871337 | PCP021823 | XR_669751    |
| PCP021865 | 8,309840108 | 8,350187812 | 8,353146825 | 8,215921225 | PCP021865 | XM_009379864 |
| PCP021875 | 8,780277286 | 7,691185174 | 7,080337882 | 5,906890596 | PCP021875 | XM_009354267 |
| PCP021897 | 8,184875343 | 8,336863563 | 8,445718428 | 8,686500527 | PCP021897 | XM_009377867 |
| PCP021909 | 7,526147081 | 7,279192684 | 7,528805707 | 7,062531903 | PCP021909 | XM_009337195 |
| PCP021923 | 7,400879436 | 7,380850638 | 7,670089681 | 8,209453366 | PCP021923 | XM_009358440 |
| PCP021931 | 7,348728154 | 7,206232954 | 6,878602742 | 6,942514505 | PCP021931 | XM_009364468 |
| PCP021936 | 6,878602742 | 6,882643049 | 7,294620749 | 7,526147081 |           |              |
| PCP021944 | 7,520972191 | 7,648681141 | 7,818070833 | 8,268331458 |           |              |
| PCP021948 | 7,22881869  | 7,483815777 | 7,88062431  | 8,168270966 | PCP021948 | XM_009374933 |
| PCP021951 | 8,168270966 | 8,189824559 | 8,053491515 | 7,977279923 | PCP021951 | XM_018642384 |
| PCP021953 | 7,395148508 | 7,572359168 | 7,750405521 | 8,027905997 |           |              |
| PCP021955 | 8,835008208 | 8,329437582 | 8,48651327  | 8,073231127 | PCP021955 | XM_009335438 |
| PCP021956 | 8,110248388 | 8,19313106  | 7,896816753 | 7,698149009 | PCP021956 | XM_009335440 |
| PCP021958 | 8,503825738 | 8,320439548 | 8,50779464  | 8,335390355 | PCP021958 | XM_008367671 |
| PCP021959 | 7,238404739 | 7,260496187 | 7,513095909 | 8,513056419 |           |              |
| PCP021964 | 7,263691734 | 7,549438149 | 7,952275317 | 8,290018847 | PCP021964 | XM_009349425 |
| PCP021977 | 8,089212109 | 8,08571145  | 8,049848549 | 8,540438054 |           |              |
| PCP021979 | 7,62935662  | 7,752681699 | 7,888743249 | 8,164906927 | PCP021979 | XM_009335712 |
| PCP022006 | 8,069691427 | 8,560982378 | 8,723387907 | 9,082149041 | PCP022006 | XM_008374462 |
| PCP022015 | 7,54689446  | 7,266786541 | 7,354646096 | 7,069637728 |           |              |
| PCP022026 | 7,567347696 | 5,77267747  | 7,648681141 | 9,553302899 | PCP022026 | NM_001302284 |
| PCP022036 | 7,159871337 | 7,291585141 | 7,497213158 | 8,013071384 |           |              |
| PCP022037 | 8,016808288 | 7,772611496 | 7,787902559 | 7,868328714 |           |              |
| PCP022038 | 8,466260038 | 8,48651327  | 8,262094845 | 8,254225537 | PCP022038 | XM_009339271 |
| PCP022043 | 6,624539604 | 7,026025399 | 7,047996356 | 7,377904593 | PCP022043 | XM_009352046 |
| PCP022051 | 7,994353437 | 8,024197765 | 8,309840108 | 8,60855054  | PCP022051 | XM_017335882 |
| PCP022057 | 7,062531903 | 6,977279923 | 7,309885571 | 7,660566438 | PCP022057 | XM_008390598 |
| PCP022070 | 7,392317423 | 7,429030064 | 7,882643049 | 7,159871337 | PCP022070 | XM_008375078 |
| PCP022081 | 7,483815777 | 7,515699838 | 7,363433935 | 7,136170875 | PCP022081 | XM_009359878 |
| PCP022087 | 6,539158811 | 6,523561956 | 6,857980995 | 7,604886762 | PCP022087 | XM_009361444 |
| PCP022103 | 7,118941073 | 7,14974712  | 7,44567705  | 7,723353774 | PCP022103 | XM_009361494 |
| PCP022104 | 7           | 7,06608919  | 7,260496187 | 7,916894583 | PCP022104 | XM_009361486 |
| PCP022109 | 8,038918989 | 7,969645536 | 8,201290788 | 8,532667615 |           |              |

|           |             |             |             |             |           |              |
|-----------|-------------|-------------|-------------|-------------|-----------|--------------|
| PCP022110 | 8,255831156 | 8,462175047 | 8,579956993 | 9,10938668  | PCP022110 | XM_009350147 |
| PCP022122 | 8,379378367 | 8,247927513 | 8,431831861 | 9,044394119 | PCP022122 | XM_009364283 |
| PCP022137 | 7,752681699 | 8,370687407 | 8,306836389 | 8,181549844 |           |              |
| PCP022144 | 7,658211483 | 7,698149009 | 7,878541438 | 8,274587815 | PCP022144 | XM_009352860 |
| PCP022145 | 7,303780748 | 7,481153605 | 7,776959347 | 7,998139076 |           |              |
| PCP022168 | 8,844454703 | 8,239980333 | 8,033423002 | 8,215921225 | PCP022168 | XM_009352988 |
| PCP022192 | 8,459431619 | 8,50779464  | 8,579956993 | 9,413627929 | PCP022192 | XM_008389930 |
| PCP022201 | 8,09976859  | 7,754887502 | 8,385129006 | 8,105018005 | PCP022201 | NM_001302320 |
| PCP022204 | 7,539158811 | 7,453929061 | 7,750405521 | 8,257387843 | PCP022204 | XM_008392572 |
| PCP022237 | 8,448446735 | 8,56350137  | 8,416459769 | 8,062477937 | PCP022237 | XM_009364157 |
| PCP022271 | 7,541716163 | 7,348728154 | 7,406587689 | 6,890811455 | PCP022271 | XM_008345793 |
| PCP022285 | 8,372125027 | 8,089212109 | 7,950293432 | 7,269874722 | PCP022285 | XM_018652419 |
| PCP022359 | 8,184875343 | 8,506486109 | 8,154818109 | 8,694636474 | PCP022359 | XM_009379889 |
| PCP022362 | 7,973439079 | 7,92677039  | 7,815895594 | 7,658211483 | PCP022362 | XM_009339895 |
| PCP022365 | 8,132731056 | 7,884658968 | 8,258942852 | 7,658211483 |           |              |
| PCP022367 | 7,528805707 | 7,510408147 | 7,459431619 | 7,321928095 | PCP022367 | XM_008352870 |
| PCP022373 | 8,108524457 | 8,335390355 | 8,479780264 | 8,74708524  |           |              |
| PCP022424 | 7,260496187 | 7,333870928 | 7,624466495 | 8,383704292 | PCP022424 | XM_009376791 |
| PCP022484 | 6,97349648  | 7,111970261 | 7,700439718 | 7,938579853 |           |              |
| PCP022487 | 8,54303182  | 8,776992236 | 8,757123282 | 9,095397023 | PCP022487 | XM_008388346 |
| PCP022520 | 8,08390476  | 8,124121312 | 8,900866808 | 9,605479518 |           |              |
| PCP022535 | 7,963878669 | 8,120652609 | 8,037107627 | 8,462175047 | PCP022535 | XM_009355515 |
| PCP022543 | 8,366322214 | 8,053491515 | 8,13442632  | 8,163247124 | PCP022543 | XM_009355504 |
| PCP022552 | 7,533952624 | 7,169925001 | 7,285402219 | 7,354646096 |           |              |
| PCP022560 | 6,727920455 | 6,709704193 | 7,225641265 | 7,50517639  | PCP022560 | XM_009355458 |
| PCP022562 | 7,920829209 | 7,868328714 | 7,579919292 | 6,97349648  |           |              |
| PCP022569 | 7,403693786 | 7,202907418 | 7,375039431 | 7,783522135 | PCP022569 | XM_009337088 |
| PCP022585 | 8,396604781 | 8,54689446  | 8,776992236 | 9,193944186 | PCP022585 | XM_009337271 |
| PCP022588 | 8,091012169 | 7,820178962 | 8,117227504 | 8,379378367 | PCP022588 | XM_009337250 |
| PCP022598 | 6,667750232 | 6,785681319 | 7,044394119 | 7,510408147 | PCP022598 | XM_009337381 |
| PCP022604 | 8,254225537 | 8,501160452 | 8,369248353 | 8,968666793 | PCP022604 | XM_009337426 |
| PCP022625 | 7,62935662  | 7,626950122 | 7,670089681 | 7,440204752 |           |              |
| PCP022626 | 8,078577814 | 8,14974712  | 8,113742166 | 8,613494819 | PCP022626 | XR_667130    |
| PCP022633 | 7,026025399 | 7,403693786 | 7,494495616 | 7,77478706  | PCP022633 | XM_009357104 |
| PCP022638 | 7,944448531 | 8,033423002 | 8,202956379 | 8,678318438 | PCP022638 | XM_017333803 |
| PCP022649 | 8,08390476  | 8,263644792 | 8,37794796  | 8,596189756 |           |              |
| PCP022652 | 8,277659361 | 8,049848549 | 8,14974712  | 8,038918989 |           |              |
| PCP022662 | 7,108524457 | 6,781359714 | 7,442943496 | 7,206232954 | PCP022662 | XM_009379721 |
| PCP022664 | 8,568602197 | 8,502513601 | 8,6794801   | 9,405843489 |           |              |
| PCP022690 | 7,87036472  | 8           | 7,787902559 | 7,552054236 |           |              |
| PCP022694 | 8,475733431 | 8,675957033 | 8,857980995 | 9,310612782 | PCP022694 | XM_009379770 |
| PCP022709 | 8,206184105 | 7,691185174 | 7,878541438 | 7,866228001 | PCP022709 | XM_009379798 |
| PCP022714 | 6,781359714 | 7,069637728 | 7,176621973 | 7,757089938 |           |              |
| PCP022724 | 8,21106088  | 7,967687386 | 8,124121312 | 7,890750668 | PCP022724 | XM_009346102 |
| PCP022729 | 7,417852515 | 7,624466495 | 7,711976642 | 7,415065677 |           |              |
| PCP022734 | 7,811663685 | 7,730164413 | 7,876516947 | 7,105070402 | PCP022734 | XM_018652367 |

|           |             |             |             |             |           |              |
|-----------|-------------|-------------|-------------|-------------|-----------|--------------|
| PCP022737 | 7,136170875 | 7,544346278 | 7,069637728 | 7,044394119 | PCP022737 | XM_009380532 |
| PCP022740 | 7,50779464  | 7,470292816 | 7,303780748 | 7,822284016 | PCP022740 | XM_009377483 |
| PCP022756 | 8,329437582 | 7,864186145 | 8,011227255 | 7,783522135 | PCP022756 | XM_009341058 |
| PCP022767 | 8,28692734  | 8,283875484 | 8,32791187  | 7,890750668 | PCP022767 | XM_008368309 |
| PCP022784 | 6,926829678 | 7,007531912 | 7,222360218 | 7,564759219 | PCP022784 | XM_009339367 |
| PCP022785 | 7,073284692 | 6,996275749 | 7,339850003 | 7,641473777 | PCP022785 | XM_009339368 |
| PCP022786 | 8,092757141 | 7,765998774 | 7,998139076 | 7,634230226 |           |              |
| PCP022795 | 7,587440004 | 7,499845887 | 7,988684687 | 7,874489611 | PCP022795 | XM_009339362 |
| PCP022816 | 7,429030064 | 7,273049587 | 7,386552314 | 7,047996356 | PCP022816 | XM_009367760 |
| PCP022825 | 9,14381685  | 8,724513853 | 8,32494558  | 8,54303182  | PCP022825 | XM_008394722 |
| PCP022828 | 8,335390355 | 8,257387843 | 7,847558521 | 8,174925683 | PCP022828 | XM_009346296 |
| PCP022831 | 7,417852515 | 7,491853096 | 7,333870928 | 8,051643995 |           |              |
| PCP022843 | 7,058857621 | 7,389480771 | 7,291585141 | 7,896816753 | PCP022843 | XM_009346134 |
| PCP022844 | 7,956114749 | 7,727920455 | 7,855927425 | 8,332394659 |           |              |
| PCP022846 | 7,159871337 | 7,21916852  | 7,956114749 | 8,568602197 | PCP022846 | XM_009346095 |
| PCP022879 | 7,429030064 | 7,483815777 | 7,63175911  | 8,011227255 | PCP022879 | XM_009352412 |
| PCP022893 | 7,122362117 | 6,890811455 | 7,132679654 | 7,64385619  | PCP022893 | XM_008358165 |
| PCP022901 | 7,139551352 | 7,254272787 | 7,231989133 | 6,97349648  | PCP022901 | XM_009350259 |
| PCP022926 | 6,950351762 | 8,246360579 | 8,369248353 | 7,672425342 | PCP022926 | XM_008380353 |
| PCP022934 | 8,41079052  | 8,390899794 | 8,269921462 | 8,647458426 | PCP022934 | XM_008349562 |
| PCP022945 | 7,129283017 | 7,247927513 | 7,377904593 | 7,811663685 | PCP022945 | XM_009367940 |
| PCP022956 | 8,530094158 | 8,345760055 | 8,388017285 | 8,390899794 |           |              |
| PCP022957 | 8,276124405 | 8,146339557 | 8,28077077  | 8,63542792  | PCP022957 | XM_009367915 |
| PCP022962 | 8,144658243 | 8,027905997 | 8,049848549 | 8,031604721 | PCP022962 | XM_009367895 |
| PCP022982 | 8,120652609 | 7,648681141 | 7,222360218 | 6,882643049 | PCP022982 | XM_009352291 |
| PCP022983 | 8,993419626 | 8,545620932 | 8,503825738 | 8,805195705 |           |              |
| PCP022991 | 8,514398461 | 8,449850215 | 8,672425342 | 9,159871337 | PCP022991 | XM_009368086 |
| PCP023006 | 7,159871337 | 6,926829678 | 6,279285561 | 7,312882955 |           |              |
| PCP023011 | 7,094552786 | 7,215969746 | 7,183188734 | 6,946379968 |           |              |
| PCP023014 | 7,599912842 | 7,440204752 | 7,653418353 | 8,176572111 | PCP023014 | XM_009347767 |
| PCP023021 | 7,526147081 | 7,324900589 | 7,257387843 | 6,87036472  | PCP023021 | XM_009364095 |
| PCP023040 | 7,115511897 | 7,263691734 | 7,569855608 | 7,74819285  |           |              |
| PCP023052 | 7,139551352 | 7,369204723 | 7,730164413 | 7,971543554 | PCP023052 | XM_009378066 |
| PCP023055 | 6,969587981 | 6,981053471 | 7,225641265 | 7,607330314 |           |              |
| PCP023059 | 7,592457037 | 7,698149009 | 7,589988142 | 7,231989133 | PCP023059 | XM_008377759 |
| PCP023061 | 8,014968933 | 7,790055203 | 8,076815597 | 7,886733033 | PCP023061 | XR_001952709 |
| PCP023069 | 7,260496187 | 7,241554209 | 7,464913269 | 7,853808564 | PCP023069 | XM_009341482 |
| PCP023071 | 7,321928095 | 7,058857621 | 7,462134139 | 7,752681699 | PCP023071 | XM_021964791 |
| PCP023086 | 7,845490051 | 7,868328714 | 8,037107627 | 8,336863563 |           |              |
| PCP023089 | 7,118941073 | 6,930737338 | 7,166615031 | 7,768184325 |           |              |
| PCP023093 | 8,64385619  | 8,202956379 | 8,528766645 | 7,702726796 | PCP023093 | XM_009365045 |
| PCP023102 | 7,429030064 | 7,022367813 | 6,845490051 | 6,369291982 | PCP023102 | XM_018644160 |
| PCP023122 | 7,754887502 | 7,309885571 | 7,456724026 | 7,324900589 | PCP023122 | XM_008372482 |
| PCP023123 | 7,759355602 | 7,641473777 | 7,896816753 | 8,207844058 | PCP023123 | XM_008347492 |
| PCP023127 | 6,862079387 | 7,108524457 | 7,212666605 | 7,497213158 | PCP023127 | XM_008372472 |
| PCP023139 | 8,550746785 | 8,666508075 | 8,606109055 | 8,473015688 | PCP023139 | XM_008369546 |

|           |             |             |             |             |           |              |
|-----------|-------------|-------------|-------------|-------------|-----------|--------------|
| PCP023151 | 7,634230226 | 7,50517639  | 7,470292816 | 7,406587689 | PCP023151 | XM_009340113 |
| PCP023175 | 8,011227255 | 8,385129006 | 8,731319031 | 9,278449458 |           |              |
| PCP023176 | 8,862110391 | 8,554588852 | 8,035238993 | 7,169925001 | PCP023176 | XM_009369324 |
| PCP023200 | 6,80309785  | 6,624539604 | 7,044394119 | 7,924812504 | PCP023200 | XM_009371914 |
| PCP023212 | 8,606109055 | 8,630558365 | 8,820178962 | 8,68183575  |           |              |
| PCP023221 | 8,376472723 | 8,536558066 | 8,651051691 | 9,189009107 |           |              |
| PCP023223 | 8,262094845 | 8,293103743 | 8,481113232 | 8,894817763 |           |              |
| PCP023229 | 7,497213158 | 7,044394119 | 7,115511897 | 7,196430001 | PCP023229 | XM_018650817 |
| PCP023231 | 6,942514505 | 7,007531912 | 7,531381461 | 8,28077077  | PCP023231 | XM_009373396 |
| PCP023232 | 7,003714662 | 7,251056285 | 7,051698368 | 6,357552005 | PCP023232 | XM_009373395 |
| PCP023238 | 7,602364826 | 7,641473777 | 7,62935662  | 8,651051691 | PCP023238 | XM_008381807 |
| PCP023239 | 8,54303182  | 7,969645536 | 8,509101985 | 9,273795599 | PCP023239 | XR_001787032 |
| PCP023243 | 8,510447709 | 8,28077077  | 8,163247124 | 8,020535537 | PCP023243 | XM_008367336 |
| PCP023268 | 7,392317423 | 7,725673    | 7,389480771 | 7,037052702 | PCP023268 | XM_008377279 |
| PCP023283 | 7,159871337 | 6,922792504 | 7,244791942 | 7,539158811 |           |              |
| PCP023286 | 7,336908182 | 7,294620749 | 7,648681141 | 7,434628228 | PCP023286 | XR_001787708 |
| PCP023316 | 7,95419631  | 7,805227956 | 7,992485211 | 8,396604781 |           |              |
| PCP023320 | 8,285402219 | 8,666508075 | 8,782441329 | 8,309840108 | PCP023320 | XM_009380357 |
| PCP023323 | 7,961912672 | 7,244791942 | 7,946438456 | 7,757089938 | PCP023323 | XM_009380361 |
| PCP023326 | 8,395191361 | 8,055282436 | 8,106798463 | 8,048050866 | PCP023326 | XM_009381228 |
| PCP023329 | 8,009380767 | 8,255831156 | 8,383704292 | 8,526186214 |           |              |
| PCP023334 | 7,853808564 | 8,159871337 | 8,199672345 | 8,08571145  | PCP023334 | XM_009361191 |
| PCP023336 | 8,027905997 | 8,243173983 | 7,971543554 | 8,082149041 |           |              |
| PCP023340 | 8,153146652 | 8,263644792 | 8,649866903 | 8,693486957 | PCP023340 | XM_008394624 |
| PCP023341 | 7,822284016 | 8,33391564  | 8,58747751  | 8,991521846 | PCP023341 | XM_009361200 |
| PCP023350 | 7,924812504 | 8,033423002 | 7,691185174 | 7,456724026 | PCP023350 | XM_009343381 |
| PCP023351 | 7,315874125 | 7,497213158 | 7,557119022 | 8,276124405 |           |              |
| PCP023356 | 7,718841075 | 7,700439718 | 7,602364826 | 7,462134139 | PCP023356 | XM_018648801 |
| PCP023379 | 7,958088658 | 7,718841075 | 7,876516947 | 7,486473046 | PCP023379 | XM_009342097 |
| PCP023417 | 7,977279923 | 7,952275317 | 8,46760555  | 8,74819285  | PCP023417 | XM_008341755 |
| PCP023418 | 8,348728154 | 8,539158811 | 8,581200582 | 8,915879379 |           |              |
| PCP023419 | 6,777025123 | 6,38663853  | 7,087462841 | 7,6794801   | PCP023419 | XM_008341766 |
| PCP023426 | 7,562242424 | 7,494495616 | 7,297649983 | 7,950293432 | PCP023426 | XM_021453800 |
| PCP023432 | 7,375039431 | 6,594996337 | 7,062531903 | 6,790120385 |           |              |
| PCP023441 | 7,409390936 | 7,820178962 | 7,61227877  | 7,260496187 | PCP023441 | XM_008364929 |
| PCP023447 | 8,573647187 | 8,612241904 | 8,72904287  | 9,244768161 | PCP023447 | XM_008363557 |
| PCP023463 | 7,080337882 | 7,163196797 | 7,309885571 | 7,845490051 |           |              |
| PCP023469 | 8,614709844 | 8,761551232 | 8,664162806 | 8,692336525 | PCP023469 | XM_009356405 |
| PCP023473 | 8,473015688 | 9,047123912 | 8,684152487 | 8,367764188 | PCP023473 | XM_018642781 |
| PCP023475 | 8,113742166 | 8,09976859  | 7,967687386 | 8,020535537 | PCP023475 | XM_009337149 |
| PCP023496 | 9,015888903 | 8,58747751  | 8,703903573 | 8,966736149 | PCP023496 | XM_009345055 |
| PCP023500 | 7,695785075 | 7,475733431 | 7,309885571 | 7,475733431 | PCP023500 | XM_009347979 |
| PCP023510 | 8,434628228 | 8,596189756 | 8,654636029 | 8,348728154 | PCP023510 | XM_009380801 |
| PCP023527 | 8,181549844 | 8,569855608 | 8,523561956 | 8,434628228 | PCP023527 | XM_008365240 |
| PCP023559 | 7,282347131 | 7,115511897 | 7,282347131 | 7,700439718 |           |              |
| PCP023560 | 7,437377568 | 7,186559982 | 7,98111057  | 10,28924659 |           |              |

|           |             |             |             |             |           |              |
|-----------|-------------|-------------|-------------|-------------|-----------|--------------|
| PCP023578 | 7,273049587 | 6,857980995 | 7,073284692 | 7,069637728 | PCP023578 | XM_017323332 |
| PCP023580 | 8,862110391 | 8,73470962  | 8,652235507 | 9,054387253 |           |              |
| PCP023593 | 7,520972191 | 6,894817763 | 7,011227255 | 6,369291982 | PCP023593 | XM_009362005 |
| PCP023594 | 6,785681319 | 6,705010253 | 6,845490051 | 7,315874125 | PCP023594 | XM_009362007 |
| PCP023596 | 6,988684687 | 7,251056285 | 7           | 6,981053471 | PCP023596 | XM_009362000 |
| PCP023601 | 7,055282436 | 7,129283017 | 7,360452072 | 7,839203788 | PCP023601 | XR_001786932 |
| PCP023604 | 7,406587689 | 7,491853096 | 8,462175047 | 10,01495499 | PCP023604 | XM_009351133 |
| PCP023616 | 6,727920455 | 7,026025399 | 7,462134139 | 8,24474438  | PCP023616 | XM_009378031 |
| PCP023619 | 7,026025399 | 6,965784285 | 7,209453366 | 7,648681141 | PCP023619 | XM_009342538 |
| PCP023629 | 7,186559982 | 7,354646096 | 7,417852515 | 7,860031646 |           |              |
| PCP023641 | 8,122413888 | 8,279239123 | 7,948367232 | 10,44639065 | PCP023641 | NM_001302329 |
| PCP023646 | 7,8008999   | 7,761551232 | 7,996219247 | 8,832890014 | PCP023646 | XM_009345584 |
| PCP023659 | 8,199672345 | 8,163247124 | 8,269921462 | 8,711942238 |           |              |
| PCP023663 | 8,246360579 | 8,437419184 | 8,537878433 | 8,793343194 |           |              |
| PCP023685 | 7,491853096 | 7,544346278 | 7,674757228 | 8,051643995 |           |              |
| PCP023695 | 7,392317423 | 7,61227877  | 7,908872939 | 8,62935662  | PCP023695 | XM_008347948 |
| PCP023696 | 6,918863237 | 6,894817763 | 7,333870928 | 7,787902559 |           |              |
| PCP023705 | 7,129283017 | 7,429030064 | 7,686500527 | 7,952275317 |           |              |
| PCP023707 | 8,510447709 | 8,75598914  | 8,685344507 | 8,6794801   | PCP023707 | XM_009378089 |
| PCP023724 | 8,087462841 | 8,105018005 | 8,139551352 | 7,928784831 | PCP023724 | XM_009376639 |
| PCP023734 | 7,626950122 | 7,169925001 | 7,357552005 | 7,156538193 |           |              |
| PCP023735 | 8,485145023 | 8,376472723 | 8,420676082 | 7,916894583 | PCP023735 | XM_018647713 |
| PCP023767 | 8,515699838 | 8,466260038 | 8,726797165 | 8,971543554 | PCP023767 | XR_001951388 |
| PCP023776 | 8,188193194 | 8,474395481 | 8,830768706 | 9,303027245 | PCP023776 | XM_009363905 |
| PCP023790 | 7,862141394 | 7,924812504 | 7,956114749 | 7,324900589 | PCP023790 | XM_009339479 |
| PCP023792 | 7,058857621 | 7,294620749 | 7,622051819 | 7,922851957 | PCP023792 | XM_009375072 |
| PCP023798 | 7,667679281 | 7,693486957 | 7,691185174 | 7,429030064 | PCP023798 | XM_009374047 |
| PCP023831 | 7,739240553 | 7,910912508 | 8,3994702   | 8,946409212 | PCP023831 | XM_009350412 |
| PCP023868 | 8,038918989 | 7,882643049 | 7,857980995 | 7,395148508 | PCP023868 | XM_018652464 |
| PCP023878 | 9           | 8,35169016  | 8,148069774 | 7,489205728 | PCP023878 | XM_009364277 |
| PCP023940 | 8,058911723 | 8,28077077  | 8,478446064 | 8,873444113 |           |              |
| PCP023995 | 6,599912842 | 6,80309785  | 6,672425342 | 7,624466495 | PCP023995 | XM_008394899 |
| PCP024122 | 8,28077077  | 8,161535025 | 8,549476655 | 8,285402219 |           |              |
| PCP024127 | 6,768184325 | 7,101503009 | 7,294620749 | 7,549438149 | PCP024127 | XM_009368683 |
| PCP024149 | 6,528727582 | 6,828707735 | 7,037052702 | 8,417852515 | PCP024149 | XM_009345018 |
| PCP024153 | 7,515699838 | 7,619633096 | 7,318949464 | 7,094552786 | PCP024153 | XM_009345007 |
| PCP024169 | 7,624466495 | 7,718841075 | 7,896816753 | 8,232037117 | PCP024169 | XM_008370393 |
| PCP024179 | 9,382991408 | 9,164906927 | 8,154818109 | 8,089212109 | PCP024179 | XM_009350122 |
| PCP024198 | 7,360452072 | 7,707359132 | 8,344295908 | 9,137836494 | PCP024198 | XM_009344489 |
| PCP024201 | 8,018645301 | 8,21757002  | 8,45532722  | 8,853839746 |           |              |
| PCP024206 | 8,806291831 | 8,591223118 | 8,105018005 | 7,796558821 | PCP024206 | XM_008391556 |
| PCP024208 | 8,268331458 | 8,442943496 | 8,339850003 | 8,338379842 | PCP024208 | XM_009360998 |
| PCP024211 | 6,898812977 | 7,069637728 | 7,055282436 | 8,136119594 | PCP024211 | XM_008391544 |
| PCP024244 | 8,048050866 | 8,366322214 | 8,74929961  | 9,132705355 | PCP024244 | XM_008391507 |
| PCP024269 | 7,42063398  | 7,725673    | 7,906890596 | 8,519636253 | PCP024269 | XM_008388390 |
| PCP024279 | 7,910912508 | 7,826548487 | 7,572359168 | 8,051643995 | PCP024279 | XM_009348831 |

|           |             |             |             |             |           |              |
|-----------|-------------|-------------|-------------|-------------|-----------|--------------|
| PCP024282 | 7,473056289 | 7,730164413 | 8,471675214 | 8,552015799 | PCP024282 | XM_009348836 |
| PCP024289 | 9,014941046 | 8,686500527 | 8,559682997 | 8,654636029 |           |              |
| PCP024290 | 8,363390129 | 8,463524373 | 8,291539098 | 8,338379842 |           |              |
| PCP024313 | 6,922792504 | 6,97349648  | 7,115511897 | 7,557119022 | PCP024313 | XM_009374807 |
| PCP024319 | 7,473056289 | 7,50779464  | 7,732472726 | 6,934634441 | PCP024319 | XM_009374825 |
| PCP024336 | 7,241554209 | 7,254272787 | 7,22881869  | 7,772611496 | PCP024336 | XM_018648433 |
| PCP024347 | 7,63175911  | 8,43325159  | 8,171577143 | 8,46760555  | PCP024347 | XM_008365968 |
| PCP024348 | 7,499845887 | 7,779194046 | 8,058911723 | 8,412231097 | PCP024348 | XM_009362584 |
| PCP024357 | 8,438791853 | 8,727920455 | 8,77478706  | 9,059804103 |           |              |
| PCP024376 | 7,459431619 | 7,757089938 | 7,582480735 | 7,456724026 | PCP024376 | XM_018647613 |
| PCP024407 | 7,199672345 | 7,473056289 | 8,020535537 | 8,874458871 | PCP024407 | XM_018644175 |
| PCP024414 | 8,714245518 | 8,742578916 | 8,926800034 | 8,77478706  |           |              |
| PCP024427 | 7,681800619 | 7,377904593 | 7,321928095 | 7,087462841 |           |              |
| PCP024430 | 8,630558365 | 8,545620932 | 8,864186145 | 9,252665432 | PCP024430 | XR_525001    |
| PCP024438 | 8,430452552 | 8,385129006 | 8,515699838 | 8,843387202 | PCP024438 | XM_008372468 |
| PCP024439 | 6,686500527 | 7,026025399 | 7,235248379 | 7,464913269 | PCP024439 | XM_009377120 |
| PCP024457 | 7,456724026 | 7,132679654 | 7,076815597 | 6,841344192 | PCP024457 | XM_009376793 |
| PCP024474 | 7,21916852  | 7,125878364 | 7,173227395 | 7,693486957 | PCP024474 | XM_018644751 |
| PCP024476 | 6,528727582 | 6,790120385 | 7,058857621 | 7,380850638 | PCP024476 | XM_009349710 |
| PCP024501 | 8,101555535 | 8,227230852 | 8,32791187  | 8,698114274 | PCP024501 | XM_009367256 |
| PCP024519 | 8,522267655 | 8,330916878 | 8,540438054 | 9,234410306 |           |              |
| PCP024529 | 7,709635275 | 7,557119022 | 7,982993575 | 8,137862104 | PCP024529 | XM_009367308 |
| PCP024547 | 7,589988142 | 7,730164413 | 7,946438456 | 8,792237182 | PCP024547 | XM_018651471 |
| PCP024565 | 7,607330314 | 7,574934058 | 7,670089681 | 7,269874722 | PCP024565 | XM_009337533 |
| PCP024577 | 8,550746785 | 8,60855054  | 8,67479253  | 9,075024475 |           |              |
| PCP024583 | 6,988684687 | 7,531381461 | 7,244791942 | 8,268331458 | PCP024583 | XM_009348794 |
| PCP024586 | 7,363433935 | 7,599912842 | 7,670089681 | 7,360452072 | PCP024586 | XM_008343333 |
| PCP024591 | 7,369204723 | 7,866228001 | 7,851749041 | 9,120678526 |           |              |
| PCP024611 | 7,677155841 | 7,153095972 | 7,42063398  | 7,108524457 | PCP024611 | XM_009367820 |
| PCP024642 | 6,87036472  | 6,807354922 | 6,95419631  | 8,429071922 | PCP024642 | XM_009369446 |
| PCP024649 | 7,765998774 | 7,577428828 | 7,515699838 | 7,28845085  | PCP024649 | XM_009369459 |
| PCP024658 | 6,988684687 | 6,790120385 | 6,910852562 | 7,473056289 | PCP024658 | XM_008394211 |
| PCP024661 | 7,809478757 | 8,003770871 | 7,998139076 | 7,839203788 | PCP024661 | XM_009354108 |
| PCP024668 | 7,494495616 | 7,552054236 | 7,351645995 | 7,199672345 | PCP024668 | XM_008394227 |
| PCP024709 | 8,41502341  | 8,382278171 | 8,474395481 | 8,901862467 | PCP024709 | XM_008364662 |
| PCP024725 | 7,309885571 | 7,163196797 | 7,412188747 | 7,153095972 | PCP024725 | XM_018644706 |
| PCP024727 | 7,132679654 | 7,489205728 | 7,481153605 | 7,3458044   | PCP024727 | XM_008387892 |
| PCP024729 | 7,862141394 | 7,952275317 | 8,064311643 | 8,357552005 |           |              |
| PCP024731 | 6,403778984 | 6,832890014 | 6,981053471 | 7,309885571 |           |              |
| PCP024733 | 7,969645536 | 7,754887502 | 7,998139076 | 8,341318667 |           |              |
| PCP024734 | 6,709704193 | 7,014913158 | 7,115511897 | 7,54689446  |           |              |
| PCP024747 | 7,930737338 | 7,963878669 | 8,044394119 | 7,658211483 |           |              |
| PCP024748 | 7,818070833 | 8,018645301 | 8,22881869  | 7,922851957 |           |              |
| PCP024766 | 7,383704292 | 7,431873638 | 7,963878669 | 7,709635275 | PCP024766 | XM_009369796 |
| PCP024769 | 8,227230852 | 8,434628228 | 8,04072808  | 7,380850638 |           |              |
| PCP024781 | 7,809478757 | 8,053491515 | 8,269921462 | 8,459431619 |           |              |

|           |             |             |             |             |           |              |
|-----------|-------------|-------------|-------------|-------------|-----------|--------------|
| PCP024803 | 7,918863237 | 8,075051225 | 7,721099189 | 7,297649983 | PCP024803 | XM_009372735 |
| PCP024807 | 8,877529547 | 8,882643049 | 8,851749041 | 8,649866903 | PCP024807 | XM_009372801 |
| PCP024818 | 8,503825738 | 8,478446064 | 8,398016818 | 8,32494558  | PCP024818 | XM_009369043 |
| PCP024830 | 7,743689989 | 7,321928095 | 7,62935662  | 7,518299077 | PCP024830 | XR_667089    |
| PCP024846 | 7,8008999   | 7,639015048 | 7,736943052 | 7,42063398  | PCP024846 | XM_009361168 |
| PCP024890 | 7,111970261 | 7,22881869  | 6,882643049 | 6,745909573 |           |              |
| PCP024892 | 7,212666605 | 6,894817763 | 7,464913269 | 7,132679654 | PCP024892 | XM_009338347 |
| PCP024903 | 8,357552005 | 8,22881869  | 8,279239123 | 8,232037117 | PCP024903 | XM_008390090 |
| PCP024912 | 7,42063398  | 7,518299077 | 7,597456684 | 8,201290788 |           |              |
| PCP024919 | 7,417852515 | 7,562242424 | 7,321928095 | 7,315874125 | PCP024919 | XM_009374699 |
| PCP024921 | 7,822284016 | 7,8008999   | 7,839203788 | 8,302273349 |           |              |
| PCP024930 | 7,336908182 | 7,526147081 | 7,803033252 | 7,736943052 | PCP024930 | XM_009343459 |
| PCP024950 | 8,113742166 | 8,142974967 | 8,332394659 | 8,754887502 |           |              |
| PCP024953 | 6,97349648  | 7,333870928 | 7,28845085  | 6,918863237 | PCP024953 | XM_008346240 |
| PCP024961 | 6,984931073 | 7,08395793  | 6,946379968 | 6,72342204  | PCP024961 | XM_018649133 |
| PCP024964 | 7,080337882 | 7,300764373 | 7,166615031 | 7,06608919  |           |              |
| PCP024980 | 8,136119594 | 8,282300792 | 8,382278171 | 8,176572111 | PCP024980 | XM_009353895 |
| PCP024990 | 8,124121312 | 8,279239123 | 8,163247124 | 8,075051225 |           |              |
| PCP025012 | 8,022367813 | 8,144658243 | 8,189824559 | 8,001858526 | PCP025012 | XM_017330361 |
| PCP025019 | 8,416459769 | 8,490530019 | 8,903881846 | 9,451891079 |           |              |
| PCP025058 | 6,874428132 | 7,058857621 | 7,146390476 | 7,636624621 | PCP025058 | XM_008375047 |
| PCP025060 | 7,297649983 | 7,386552314 | 7,406587689 | 7,225641265 | PCP025060 | XM_009369139 |
| PCP025066 | 8,442943496 | 8,619596417 | 8,743723645 | 9,138706975 | PCP025066 | XM_009342162 |
| PCP025077 | 8,073231127 | 8,21916852  | 8,356099782 | 7,973439079 | PCP025077 | XM_009381326 |
| PCP025090 | 7,973439079 | 7,857980995 | 7,924812504 | 7,375039431 | PCP025090 | XM_021968721 |
| PCP025097 | 7,860031646 | 7,339850003 | 6,965784285 | 6,420718183 | PCP025097 | XM_009377199 |
| PCP025120 | 7,794415866 | 7,930737338 | 7,934693407 | 7,779194046 | PCP025120 | XM_009361756 |
| PCP025128 | 7,051698368 | 6,686500527 | 6,938638658 | 7,451211112 | PCP025128 | XM_009362620 |
| PCP025130 | 8,069691427 | 7,950293432 | 8,181549844 | 8,602401945 | PCP025130 | XM_009362650 |
| PCP025146 | 7,582480735 | 7,429030064 | 7,351645995 | 7,186559982 |           |              |
| PCP025152 | 8,129283017 | 8,130982335 | 8,078577814 | 7,952275317 | PCP025152 | XM_009350117 |
| PCP025164 | 7,984874125 | 8,09976859  | 8,171577143 | 8,567309664 | PCP025164 | XM_009371543 |
| PCP025177 | 8,930737338 | 8,75043902  | 8,77807713  | 8,8008999   | PCP025177 | XM_009379237 |
| PCP025179 | 8,526186214 | 8,42488011  | 8,693486957 | 9,014941046 | PCP025179 | XM_009379244 |
| PCP025181 | 7,146390476 | 7,705079392 | 7,815895594 | 8,254225537 | PCP025181 | XM_009379249 |
| PCP025182 | 8,033423002 | 8,269921462 | 8,369248353 | 8,619596417 | PCP025182 | XM_009379246 |
| PCP025193 | 7,77036657  | 7,440204752 | 8,042589623 | 8,022367813 |           |              |
| PCP025196 | 6,794415866 | 6,686500527 | 7,026025399 | 7,594921715 | PCP025196 | XM_008370683 |
| PCP025202 | 6,750472519 | 6,906890596 | 7,026025399 | 7,564759219 | PCP025202 | XM_008388389 |
| PCP025203 | 7,6794801   | 7,641473777 | 7,614709844 | 8,105018005 |           |              |
| PCP025211 | 7,291585141 | 7,714245518 | 7,080337882 | 5,77267747  | PCP025211 | XM_009365744 |
| PCP025218 | 8,43325159  | 8,296136161 | 8,153146652 | 8,21916852  | PCP025218 | XM_009365737 |
| PCP025228 | 6,890811455 | 6,68187088  | 7,029784146 | 7,46760555  | PCP025228 | XM_009361467 |
| PCP025233 | 7,956114749 | 7,988684687 | 9,039823818 | 10,22239645 | PCP025233 | XM_018646238 |
| PCP025248 | 7,83080039  | 8,112022407 | 8,115459877 | 8,440163216 |           |              |
| PCP025256 | 8,029728942 | 7,536596918 | 8,049848549 | 7,776959347 | PCP025256 | XM_009339472 |



|           |             |             |             |             |           |              |
|-----------|-------------|-------------|-------------|-------------|-----------|--------------|
| PCP025262 | 8,276124405 | 8,144658243 | 8,24474438  | 8,83709175  |           |              |
| PCP025283 | 8,956143797 | 8,67479253  | 8,915879379 | 8,430452552 | PCP025283 | XM_018649958 |
| PCP025284 | 7,898873426 | 7,707359132 | 7,709635275 | 8,578674597 | PCP025284 | XM_009369850 |
| PCP025291 | 8,300718622 | 8,329437582 | 8,247927513 | 8,022367813 | PCP025291 | XM_009352059 |
| PCP025294 | 7,451211112 | 7,984874125 | 8,503825738 | 9,095397023 | PCP025294 | XM_009361280 |
| PCP025312 | 7,574934058 | 8,04072808  | 8,407989993 | 9           | PCP025312 | XM_009346019 |
| PCP025317 | 7,996219247 | 7,92677039  | 8,50779464  | 9,056177063 | PCP025317 | XM_009357989 |
| PCP025320 | 6,853870927 | 7,111970261 | 7,572359168 | 8,239980333 | PCP025320 | XM_008350125 |
| PCP025322 | 7,276124405 | 6,906890596 | 7,318949464 | 7,658211483 |           |              |
| PCP025324 | 6,50779464  | 6,750472519 | 7,142923928 | 7,619633096 | PCP025324 | XM_009335969 |
| PCP025330 | 8,826548487 | 8,73470962  | 8,69115027  | 8,693486957 |           |              |
| PCP025332 | 8,277659361 | 8,293103743 | 8,357552005 | 8,744833837 | PCP025332 | XM_009373942 |
| PCP025382 | 7,884658968 | 8,178266468 | 8,262094845 | 8,710806434 |           |              |
| PCP025396 | 7,634230226 | 7,646234675 | 7,64385619  | 8,176572111 | PCP025396 | XM_009366443 |
| PCP025499 | 7,796558821 | 7,54689446  | 7,796558821 | 7,333870928 |           |              |
| PCP025639 | 6,942514505 | 7,273049587 | 6,969587981 | 6,898812977 | PCP025639 | XM_008347713 |
| PCP025691 | 7,798763389 | 7,619633096 | 7,750405521 | 7,491853096 | PCP025691 | XM_008377346 |
| PCP025702 | 7           | 7,108524457 | 7,139551352 | 7,698149009 | PCP025702 | XM_008375909 |
| PCP025711 | 8,28077077  | 8,283875484 | 7,497213158 | 6,369291982 | PCP025711 | XM_009347652 |
| PCP025733 | 7,942514505 | 8,020535537 | 7,990557838 | 8,514398461 | PCP025733 | XM_008352293 |
| PCP025740 | 6,648609245 | 7,122362117 | 6,984931073 | 7,369204723 | PCP025740 | XM_009335961 |
| PCP025743 | 7,269874722 | 7,572359168 | 7,549438149 | 7,395148508 | PCP025743 | XM_009335993 |
| PCP025746 | 7,300764373 | 7,74819285  | 7,805227956 | 8,033423002 | PCP025746 | XM_009336002 |
| PCP025760 | 8,098032083 | 7,952275317 | 7,942514505 | 8,353146825 | PCP025760 | XM_009336177 |
| PCP025765 | 7,196430001 | 6,60481265  | 7,044394119 | 6,853870927 | PCP025765 | XM_009336248 |
| PCP025768 | 7,073284692 | 7,46760555  | 7,291585141 | 7,727920455 | PCP025768 | XM_009336279 |
| PCP025770 | 6,609843592 | 6,700439718 | 6,958030641 | 7,276124405 | PCP025770 | XM_008378996 |
| PCP025779 | 8,156487632 | 8,19313106  | 8,361943774 | 8,779161208 | PCP025779 | XM_009336441 |
| PCP025790 | 8,232037117 | 8,069691427 | 8,016808288 | 8,060695932 |           |              |
| PCP025797 | 8,456682963 | 8,260543232 | 8,169925001 | 8,141238626 | PCP025797 | XM_009336631 |
| PCP025809 | 7,136170875 | 6,930737338 | 7,266786541 | 7,688809791 |           |              |
| PCP025810 | 8,671257984 | 9,079484784 | 8,976334992 | 8,583722152 | PCP025810 | XM_009336810 |
| PCP025814 | 8,830768706 | 8,533991546 | 8,544307635 | 8,356099782 |           |              |
| PCP025819 | 7,888743249 | 8,235200503 | 8,24474438  | 7,839203788 | PCP025819 | XM_009370383 |
| PCP025820 | 7,818070833 | 7,768184325 | 7,702726796 | 8,186510462 | PCP025820 | XM_009370382 |
| PCP025822 | 7,238404739 | 7,189824559 | 7,291585141 | 7,928784831 | PCP025822 | XM_009370380 |
| PCP025830 | 6,333960351 | 6,80309785  | 6,938638658 | 7,868328714 | PCP025830 | XM_008378510 |
| PCP025846 | 8,803065551 | 8,386595423 | 8,614709844 | 8,668884984 | PCP025846 | XM_009339337 |
| PCP025850 | 8,09976859  | 8,230404783 | 8,405141463 | 8,80196697  | PCP025850 | XM_009339330 |
| PCP025854 | 7,828644274 | 7,658211483 | 7,587440004 | 7,354646096 | PCP025854 | XM_009339322 |
| PCP025878 | 8,207844058 | 8,212715235 | 8,251103639 | 8,693486957 | PCP025878 | XM_009338671 |
| PCP025892 | 7,882643049 | 8,252665432 | 8,744833837 | 9,6171552   | PCP025892 | XM_009338686 |
| PCP025893 | 8,251103639 | 8,73470962  | 8,916864735 | 9,218369492 |           |              |
| PCP025896 | 8,423452115 | 8,459431619 | 8,568602197 | 9,00750388  |           |              |
| PCP025897 | 8,687655621 | 8,523561956 | 8,764871591 | 9,099794885 | PCP025897 | XM_008390313 |
| PCP025916 | 8,146339557 | 8,142974967 | 7,619633096 | 8,051643995 |           |              |

|           |             |             |             |             |           |              |
|-----------|-------------|-------------|-------------|-------------|-----------|--------------|
| PCP025933 | 7,853808564 | 7,820178962 | 7,944448531 | 7,700439718 | PCP025933 | XM_009375019 |
| PCP025943 | 8,35169016  | 7,912889336 | 8,13442632  | 7,906890596 | PCP025943 | XM_009364733 |
| PCP025952 | 8,127581695 | 7,876516947 | 7,982993575 | 8,035238993 | PCP025952 | XM_018648871 |
| PCP025954 | 8,356099782 | 8,236827423 | 8,146339557 | 7,798763389 | PCP025954 | XM_009364706 |
| PCP025968 | 6,934634441 | 6,922792504 | 6,853870927 | 7,491853096 | PCP025968 | XM_008361864 |
| PCP025978 | 7,599912842 | 7,847558521 | 8,06786455  | 8,011227255 | PCP025978 | XM_008352669 |
| PCP025979 | 8,06608919  | 7,510408147 | 7,790055203 | 7,813781191 | PCP025979 | XM_009358118 |
| PCP025980 | 8,315919398 | 8,136119594 | 8,048050866 | 7,961912672 |           |              |
| PCP025993 | 7,515699838 | 7,688809791 | 7,691185174 | 8,08571145  |           |              |
| PCP026009 | 7,892816    | 7,531381461 | 7,536596918 | 7,462134139 | PCP026009 | XM_009371507 |
| PCP026014 | 8,291539098 | 8,726797165 | 8,900866808 | 9,108524457 | PCP026014 | XM_009371366 |
| PCP026017 | 7,672425342 | 8,141238626 | 8,148069774 | 7,884658968 | PCP026017 | XM_009371345 |
| PCP026020 | 6,163297449 | 6,878602742 | 7,360452072 | 8,54303182  | PCP026020 | XM_009371311 |
| PCP026030 | 9,341340908 | 8,277659361 | 8,606109055 | 7,723353774 |           |              |
| PCP026036 | 8,475733431 | 8,67479253  | 8,636624621 | 8,501160452 | PCP026036 | XM_009362927 |
| PCP026038 | 7,594921715 | 7,64385619  | 8,038918989 | 8,339850003 | PCP026038 | XM_009362913 |
| PCP026046 | 7,209453366 | 7,300764373 | 7,389480771 | 7,884658968 | PCP026046 | XM_009354723 |
| PCP026048 | 8,390899794 | 8,402287298 | 8,464872438 | 8,258942852 | PCP026048 | XM_009354729 |
| PCP026052 | 8,703903573 | 8,678318438 | 8,694636474 | 8,510447709 |           |              |
| PCP026053 | 8,283875484 | 8,30833903  | 8,402287298 | 8,850718177 |           |              |
| PCP026069 | 7,400879436 | 7,212666605 | 7,330916878 | 7,173227395 | PCP026069 | XM_009340434 |
| PCP026073 | 6,922792504 | 7,336908182 | 7,297649983 | 7,672425342 | PCP026073 | XM_009340388 |
| PCP026088 | 7,928784831 | 7,592457037 | 7,531381461 | 7,930737338 | PCP026088 | XM_018643318 |
| PCP026090 | 7,820178962 | 7,732472726 | 7,994353437 | 7,693486957 | PCP026090 | XM_008395005 |
| PCP026093 | 8,379378367 | 8,528766645 | 8,665335917 | 9,114601277 | PCP026093 | XM_009340037 |
| PCP026099 | 7,88062431  | 7,934693407 | 8,232037117 | 8,479780264 |           |              |
| PCP026101 | 7,040782866 | 7,003714662 | 7,225641265 | 7,910912508 | PCP026101 | XM_009339943 |
| PCP026128 | 8,09976859  | 7,750405521 | 7,809478757 | 8,142974967 |           |              |
| PCP026130 | 7,579919292 | 7,544346278 | 7,759355602 | 7,528805707 | PCP026130 | XR_526409    |
| PCP026141 | 7,847558521 | 7,805227956 | 8,427648072 | 8,035238993 |           |              |
| PCP026145 | 7,938579853 | 7,727920455 | 7,266786541 | 7,225641265 | PCP026145 | XM_008354771 |
| PCP026155 | 7,513095909 | 7,491853096 | 7,815895594 | 8,044394119 |           |              |
| PCP026161 | 8,178266468 | 8,41502341  | 8,341318667 | 8,356099782 | PCP026161 | XM_017335003 |
| PCP026178 | 7,291585141 | 7,415065677 | 7,453929061 | 8,062477937 | PCP026178 | XM_009354455 |
| PCP026183 | 7,639015048 | 7,486473046 | 7,456724026 | 7,366322214 | PCP026183 | XM_009367456 |
| PCP026199 | 8,330916878 | 8,222408523 | 8,265239967 | 8,815927606 |           |              |
| PCP026216 | 9,399448837 | 8,559682997 | 8,596189756 | 7,994353437 | PCP026216 | XM_009347771 |
| PCP026221 | 8,029728942 | 7,973439079 | 7,936637939 | 7,87036472  | PCP026221 | XM_009347781 |
| PCP026227 | 7,044394119 | 7,375039431 | 7,607330314 | 8,176572111 | PCP026227 | XM_009347794 |
| PCP026233 | 7,212666605 | 7,684187561 | 7,74819285  | 7,965784285 | PCP026233 | XM_009370883 |
| PCP026244 | 6,559644763 | 6,619559738 | 6,984931073 | 8,651051691 | PCP026244 | XM_018644663 |
| PCP026252 | 8,285402219 | 7,752681699 | 8,042589623 | 7,843418611 | PCP026252 | XM_009363249 |
| PCP026265 | 8,819125283 | 9,049848549 | 8,864186145 | 8,540438054 | PCP026265 | XM_009364462 |
| PCP026281 | 6,569855608 | 7,142923928 | 7,851749041 | 8,430452552 | PCP026281 | XM_009364435 |
| PCP026284 | 7,843418611 | 7,763743526 | 7,874489611 | 8,300718622 | PCP026284 | XM_009364430 |
| PCP026298 | 7,225641265 | 6,667750232 | 7,202907418 | 7,159871337 | PCP026298 | XM_009360287 |

|           |             |             |             |             |           |              |
|-----------|-------------|-------------|-------------|-------------|-----------|--------------|
| PCP026302 | 8,206184105 | 8,326429487 | 8,17990909  | 8,161535025 | PCP026302 | XM_009342383 |
| PCP026315 | 8,08390476  | 7,725673    | 7,906890596 | 7,730164413 | PCP026315 | XM_018644510 |
| PCP026322 | 8,243173983 | 8,380807357 | 8,437419184 | 8,273002948 | PCP026322 | XM_018644533 |
| PCP026332 | 8,108524457 | 7,960001932 | 7,834976616 | 7,554588852 |           |              |
| PCP026356 | 8,132731056 | 7,851749041 | 8,344295908 | 8,348728154 | PCP026356 | XM_020568187 |
| PCP026369 | 7,557119022 | 7,619633096 | 7,906890596 | 8,268331458 | PCP026369 | XM_009359990 |
| PCP026376 | 7,624466495 | 7,50247382  | 8,141238626 | 9,131856961 |           |              |
| PCP026381 | 8,206184105 | 8,274587815 | 8,252665432 | 8,792237182 |           |              |
| PCP026384 | 8,545620932 | 8,75598914  | 8,528766645 | 8,555854491 |           |              |
| PCP026398 | 6,609843592 | 6,714245518 | 6,965784285 | 7,702726796 |           |              |
| PCP026408 | 6,745909573 | 6,902917719 | 7,173227395 | 7,672425342 | PCP026408 | XM_009380081 |
| PCP026420 | 7,589988142 | 7,765998774 | 8,051643995 | 8,598685286 | PCP026420 | XM_009360775 |
| PCP026425 | 8,589950702 | 8,813781191 | 8,709669735 | 8,526186214 |           |              |
| PCP026441 | 8,252665432 | 8,146339557 | 8,199672345 | 8,141238626 |           |              |
| PCP026487 | 7,658211483 | 7,354646096 | 7,878541438 | 7,087462841 |           |              |
| PCP026490 | 8,279239123 | 8,303780748 | 8,479780264 | 8,28692734  | PCP026490 | XM_009338996 |
| PCP026499 | 8,037107627 | 8,169925001 | 8,62935662  | 9,08833774  | PCP026499 | XM_009345553 |
| PCP026524 | 6,807354922 | 6,523561956 | 6,882643049 | 7,434628228 | PCP026524 | XM_009344141 |
| PCP026528 | 7,904905525 | 8,075051225 | 8,196380818 | 7,837123296 | PCP026528 | XM_018647856 |
| PCP026541 | 7,483815777 | 7,567347696 | 7,462134139 | 7,415065677 |           |              |
| PCP026542 | 7,309885571 | 7,291585141 | 7,412188747 | 7,146390476 |           |              |
| PCP026557 | 8,518338423 | 8,255831156 | 8,497173232 | 8,39373366  | PCP026557 | XM_009367697 |
| PCP026561 | 7,321928095 | 7,196430001 | 7,196430001 | 7,022367813 | PCP026561 | XM_009367654 |
| PCP026577 | 7,634230226 | 7,584962501 | 7,087462841 | 7,044394119 | PCP026577 | XM_009354030 |
| PCP026582 | 7,040782866 | 6,86628983  | 7,209453366 | 6,837060204 | PCP026582 | XM_009356480 |
| PCP026593 | 7,125878364 | 7,574934058 | 7,215969746 | 7,094552786 | PCP026593 | XM_009375515 |
| PCP026597 | 8,407989993 | 8,567309664 | 8,530094158 | 7,961912672 |           |              |
| PCP026618 | 8,268331458 | 8,792237182 | 8,739206792 | 8,660602089 |           |              |
| PCP026634 | 7,77036657  | 8,007475849 | 8,136119594 | 8,544307635 | PCP026634 | NM_001294081 |
| PCP026637 | 7,868328714 | 7,651051691 | 8,014968933 | 8,74708524  | PCP026637 | XM_017325744 |
| PCP026645 | 7,209453366 | 7,166615031 | 7,21916852  | 7,721099189 | PCP026645 | XM_008391620 |
| PCP026648 | 8,462175047 | 8,703903573 | 8,685344507 | 8,672425342 | PCP026648 | XM_008352732 |
| PCP026653 | 8,3994702   | 8,447083226 | 8,584962501 | 8,920858975 | PCP026653 | XM_018652075 |
| PCP026660 | 7,783522135 | 7,515699838 | 7,357552005 | 7,790055203 | PCP026660 | XM_008380061 |
| PCP026665 | 7,862141394 | 7,898873426 | 7,700439718 | 7,406587689 | PCP026665 | XM_008371444 |
| PCP026668 | 7,254272787 | 7,520972191 | 7,567347696 | 8,026080745 | PCP026668 | XM_009361614 |
| PCP026672 | 7,531381461 | 7,398059585 | 7,691185174 | 6,996275749 | PCP026672 | XM_018644906 |
| PCP026712 | 8,076815597 | 7,730164413 | 7,853808564 | 7,924812504 | PCP026712 | XM_009362343 |
| PCP026721 | 6,837060204 | 7,339850003 | 7,30679083  | 7,222360218 | PCP026721 | XM_008369875 |
| PCP026723 | 7,244791942 | 7,159871337 | 7,17990909  | 6,84962403  |           |              |
| PCP026725 | 7,837123296 | 7,745976779 | 8,005624549 | 8,447083226 |           |              |
| PCP026731 | 8,949330653 | 8,668884984 | 8,540438054 | 8,825499451 | PCP026731 | XM_009339769 |
| PCP026735 | 8,607330314 | 8,781359714 | 8,715378619 | 8,767091963 | PCP026735 | XM_009339760 |
| PCP026740 | 7,83080039  | 8,098032083 | 8,120652609 | 8,438791853 | PCP026740 | XM_018652192 |
| PCP026752 | 6,781359714 | 7,08395793  | 7,14974712  | 7,459431619 | PCP026752 | XM_009343420 |
| PCP026753 | 8,033423002 | 8,106798463 | 8,19313106  | 7,750405521 | PCP026753 | XM_009343421 |

|           |             |             |             |             |           |              |
|-----------|-------------|-------------|-------------|-------------|-----------|--------------|
| PCP026764 | 7,658211483 | 7,745976779 | 7,960001932 | 8,232037117 |           |              |
| PCP026765 | 7,06608919  | 7,333870928 | 7,266786541 | 7,142923928 |           |              |
| PCP026787 | 7,222360218 | 7,366322214 | 6,965784285 | 6,700439718 | PCP026787 | XM_009370481 |
| PCP026789 | 8,62935662  | 7,950293432 | 7,92677039  | 9,107661718 | PCP026789 | XM_018650121 |
| PCP026796 | 7,779194046 | 8,113742166 | 7,944448531 | 7,853808564 |           |              |
| PCP026826 | 8,21916852  | 8,096293483 | 8,254225537 | 8,838163917 |           |              |
| PCP026834 | 7,672425342 | 8,024197765 | 8,426264755 | 7,739240553 |           |              |
| PCP026855 | 6,820178962 | 7,098032083 | 7,125878364 | 7,841281284 | PCP026855 | XM_008388884 |
| PCP026874 | 7,569855608 | 7,354646096 | 7,721099189 | 7,906890596 | PCP026874 | XM_008345943 |
| PCP026875 | 8,069691427 | 7,658211483 | 7,336908182 | 7,087462841 | PCP026875 | XM_018645978 |
| PCP026882 | 7,648681141 | 7,853808564 | 7,74819285  | 7,486473046 | PCP026882 | XM_009347695 |
| PCP026930 | 7,741466986 | 7,567347696 | 7,392317423 | 6,946379968 | PCP026930 | XM_018645929 |
| PCP026959 | 8,741466986 | 8,76927586  | 8,520932916 | 8,628153873 | PCP026959 | XM_008349733 |
| PCP026967 | 8,715378619 | 8,818038868 | 8,795487741 | 8,60855054  | PCP026967 | XM_009336437 |
| PCP026975 | 8,366322214 | 8,32494558  | 8,306836389 | 8,176572111 | PCP026975 | XM_008346333 |
| PCP026980 | 7,862141394 | 7,641473777 | 8,115459877 | 8,895817605 | PCP026980 | XM_009367201 |
| PCP026981 | 8,141238626 | 8,076815597 | 8,06786455  | 8,001858526 | PCP026981 | XM_009343279 |
| PCP026994 | 8,434628228 | 8,483815777 | 8,531381461 | 8,419243918 | PCP026994 | XM_009356779 |
| PCP027011 | 6,950351762 | 7,269874722 | 7,294620749 | 7,577428828 | PCP027011 | XM_018649448 |
| PCP027017 | 8,505136683 | 8,073231127 | 8,30833903  | 7,434628228 | PCP027017 | XM_017335200 |
| PCP027050 | 7,754887502 | 7,807354922 | 8,048050866 | 8,406545173 | PCP027050 | XM_009360325 |
| PCP027057 | 7,189824559 | 7,431873638 | 7,486473046 | 7,920829209 |           |              |
| PCP027097 | 6,653490009 | 6,709704193 | 7,037052702 | 7,559721231 | PCP027097 | XM_017333902 |
| PCP027118 | 7,497213158 | 7,423494135 | 7,614709844 | 8,161535025 | PCP027118 | XM_008367397 |
| PCP027180 | 7,297649983 | 7,360452072 | 7,336908182 | 6,950351762 | PCP027180 | XM_009374178 |
| PCP027186 | 7,882643049 | 7,759355602 | 7,639015048 | 7,062531903 |           |              |
| PCP027208 | 7,129283017 | 7,06608919  | 7,090959258 | 7,723353774 |           |              |
| PCP027241 | 8,252665432 | 8,207844058 | 8,027905997 | 8,06786455  | PCP027241 | XM_018646285 |
| PCP027251 | 7,139551352 | 6,841344192 | 7,14974712  | 6,824386003 | PCP027251 | XM_009346734 |
| PCP027304 | 7,321928095 | 6,81159947  | 6,84962403  | 7,297649983 | PCP027304 | XM_009344811 |
| PCP027309 | 6,718772592 | 6,785681319 | 6,981053471 | 7,536596918 | PCP027309 | XM_009343434 |
| PCP027315 | 7,051698368 | 6,828707735 | 7,159871337 | 7,515699838 | PCP027315 | XM_018644118 |
| PCP027318 | 7,533952624 | 7,604886762 | 7,8008999   | 8,413627929 | PCP027318 | XM_009343447 |
| PCP027333 | 8,815927606 | 8,693486957 | 8,677120596 | 8,517000043 | PCP027333 | XM_009346814 |
| PCP027334 | 7,440204752 | 7,312882955 | 7,61227877  | 7,872397856 | PCP027334 | XR_527841    |
| PCP027359 | 8,395191361 | 8,04072808  | 8,048050866 | 7,982993575 | PCP027359 | XM_009339906 |
| PCP027361 | 7,990557838 | 8           | 8,082149041 | 8,478446064 | PCP027361 | XM_009339907 |
| PCP027368 | 7,163196797 | 7,342785837 | 6,741466986 | 6,759289016 | PCP027368 | XM_017331705 |
| PCP027382 | 8,241601875 | 8,305286574 | 8,456682963 | 8,274587815 | PCP027382 | XM_018643332 |
| PCP027391 | 7,92677039  | 8,046196362 | 8,449850215 | 8,21916852  | PCP027391 | XM_008372189 |
| PCP027394 | 8,266786541 | 8,354602022 | 8,184875343 | 8,215921225 | PCP027394 | XM_009339956 |
| PCP027396 | 8,227230852 | 8,163247124 | 8,273002948 | 8,80841723  | PCP027396 | XM_009339953 |
| PCP027399 | 7,423494135 | 7,851749041 | 7,781359714 | 7,996219247 |           |              |
| PCP027403 | 8,309840108 | 8,367764188 | 8,214319121 | 8,246360579 | PCP027403 | XM_009378339 |
| PCP027408 | 6,554588852 | 6,894817763 | 7,055282436 | 7,736943052 |           |              |
| PCP027426 | 7,811663685 | 7,839203788 | 7,843418611 | 7,641473777 |           |              |

|           |             |             |             |             |           |              |
|-----------|-------------|-------------|-------------|-------------|-----------|--------------|
| PCP027436 | 8,037107627 | 8,115459877 | 8,376472723 | 8,654636029 | PCP027436 | XM_009370446 |
| PCP027448 | 8,118941073 | 8,080391184 | 7,695785075 | 7,658211483 | PCP027448 | XM_009370436 |
| PCP027460 | 7,655852677 | 7,665335917 | 7,693486957 | 8,117227504 | PCP027460 | XM_009370421 |
| PCP027462 | 6,902917719 | 7,033423002 | 7,315874125 | 7,794415866 | PCP027462 | XM_009370417 |
| PCP027477 | 7,986809101 | 7,783522135 | 7,809478757 | 7,62935662  | PCP027477 | XM_009359046 |
| PCP027497 | 7,139551352 | 7,483815777 | 7,700439718 | 8,274587815 | PCP027497 | XM_009342191 |
| PCP027503 | 8,246360579 | 8,21916852  | 8,383704292 | 8,703903573 |           |              |
| PCP027510 | 7,115511897 | 7,037052702 | 7,206232954 | 7,61227877  |           |              |
| PCP027532 | 7,470292816 | 7,641473777 | 7,928784831 | 8,572397068 | PCP027532 | XM_009345409 |
| PCP027534 | 7,440204752 | 8,016808288 | 8,269921462 | 9,932701967 | PCP027534 | XR_532260    |
| PCP027535 | 8,63542792  | 8,555854491 | 8,830768706 | 8,6794801   | PCP027535 | XM_017323388 |
| PCP027546 | 7,544346278 | 6,906890596 | 7,073284692 | 6,363346321 | PCP027546 | XM_009381246 |
| PCP027551 | 6,750472519 | 6,934634441 | 7,136170875 | 7,380850638 | PCP027551 | XM_009381256 |
| PCP027554 | 8,511752654 | 8,60855054  | 8,494535617 | 8,176572111 |           |              |
| PCP027555 | 8,772578508 | 8,509101985 | 8,767091963 | 8,523561956 |           |              |
| PCP027566 | 7,342785837 | 7,459431619 | 7,686500527 | 8,064311643 | PCP027566 | XM_009342232 |
| PCP027576 | 7,754887502 | 7,87036472  | 7,651051691 | 7,539158811 |           |              |
| PCP027583 | 7,855927425 | 7,996219247 | 8,230404783 | 8,673591756 | PCP027583 | XM_009342375 |
| PCP027591 | 8,048050866 | 8,069691427 | 8,037107627 | 7,963878669 |           |              |
| PCP027594 | 7,973439079 | 7,448488033 | 7,17990909  | 6,845490051 | PCP027594 | XM_009346491 |
| PCP027606 | 7,21916852  | 7,614709844 | 7,781359714 | 7,986809101 | PCP027606 | XM_009370620 |
| PCP027609 | 7,212666605 | 7,076815597 | 7,136170875 | 7,711976642 | PCP027609 | XM_009370617 |
| PCP027612 | 7,330916878 | 7,944448531 | 7,928784831 | 7,857980995 | PCP027612 | XM_008345263 |
| PCP027614 | 8,222408523 | 8,148069774 | 8,206184105 | 8,113742166 | PCP027614 | XM_009355823 |
| PCP027618 | 8,560982378 | 8,661778098 | 8,772578508 | 9,108524457 |           |              |
| PCP027620 | 7,531381461 | 7,318949464 | 7,163196797 | 7,622051819 | PCP027620 | XM_009355905 |
| PCP027625 | 8,37794796  | 8,146339557 | 8,101555535 | 8,506486109 | PCP027625 | XM_008357950 |
| PCP027631 | 8,094500005 | 8,37794796  | 8,557157324 | 8,874458871 | PCP027631 | XM_018647071 |
| PCP027651 | 7,552054236 | 7,22881869  | 7,169925001 | 7,634230226 | PCP027651 | XM_008386575 |
| PCP027662 | 7,912889336 | 7,839203788 | 7,936637939 | 8,338379842 | PCP027662 | XM_009373230 |
| PCP027675 | 6,832890014 | 7,241554209 | 7,44567705  | 7,597456684 | PCP027675 | XM_009349596 |
| PCP027678 | 8,262094845 | 8,482485305 | 8,514398461 | 8,426264755 | PCP027678 | XM_009349603 |
| PCP027693 | 7,494495616 | 7,619633096 | 7,956114749 | 8,238404739 |           |              |
| PCP027695 | 8,70276142  | 8,531381461 | 8,50779464  | 8,249492747 | PCP027695 | XM_008363584 |
| PCP027719 | 8,470333494 | 8,293103743 | 8,594959026 | 8,957102042 | PCP027719 | XM_009373080 |
| PCP027734 | 6,857980995 | 6,841344192 | 6,824386003 | 7,409390936 | PCP027734 | XM_008367714 |
| PCP027768 | 7,969645536 | 7,64385619  | 7,74819285  | 7,624466495 | PCP027768 | XM_009366565 |
| PCP027772 | 7,303780748 | 7,022367813 | 7,294620749 | 8,388017285 | PCP027772 | XM_009361334 |
| PCP027773 | 8,623259662 | 8,519636253 | 8,607330314 | 9,139551352 | PCP027773 | XM_009361331 |
| PCP027791 | 7,609769734 | 7,805227956 | 7,944448531 | 8,481113232 | PCP027791 | XM_009338828 |
| PCP027820 | 7,589988142 | 7,526147081 | 7,820178962 | 8,348728154 | PCP027820 | XM_009337371 |
| PCP027821 | 7,022367813 | 6,80309785  | 6,794415866 | 7,667679281 | PCP027821 | XR_001789422 |
| PCP027834 | 8,037107627 | 7,828644274 | 7,930737338 | 7,813781191 |           |              |
| PCP027838 | 7,674757228 | 7,928784831 | 8,120652609 | 8,471675214 | PCP027838 | XM_018646291 |
| PCP027854 | 8,490530019 | 8,696967526 | 8,797661526 | 9,024225474 | PCP027854 | XM_009348391 |
| PCP027870 | 8,613494819 | 8,579956993 | 8,725638921 | 8,540438054 | PCP027870 | XM_008342648 |

|           |             |             |             |             |           |              |
|-----------|-------------|-------------|-------------|-------------|-----------|--------------|
| PCP027884 | 8,101555535 | 8,031604721 | 8,230404783 | 8,812722827 |           |              |
| PCP027895 | 7,510408147 | 8,137862104 | 8,057071136 | 7,820178962 |           |              |
| PCP027898 | 8,120652609 | 8,17990909  | 7,906890596 | 7,815895594 | PCP027898 | XM_009350611 |
| PCP027912 | 7,375039431 | 7,369204723 | 7,74819285  | 7,494495616 | PCP027912 | XM_008380127 |
| PCP027937 | 8,014968933 | 8,176572111 | 8,291539098 | 7,619633096 | PCP027937 | XM_009374692 |
| PCP027949 | 8,156487632 | 8,024197765 | 8,171577143 | 7,828644274 |           |              |
| PCP027955 | 7,979167931 | 7,884658968 | 7,98111057  | 8,483815777 | PCP027955 | XM_009336263 |
| PCP027961 | 8,653454181 | 8,318904285 | 8,509101985 | 8,603626345 |           |              |
| PCP027970 | 7,139551352 | 7,209453366 | 7,434628228 | 7,761551232 | PCP027970 | XM_009363025 |
| PCP027972 | 8,445718428 | 8,146339557 | 8,366322214 | 7,956114749 | PCP027972 | XM_009363019 |
| PCP027977 | 7,398059585 | 7,579919292 | 7,62935662  | 8,148069774 | PCP027977 | XM_009363013 |
| PCP027978 | 8,103287808 | 8,209453366 | 8,186510462 | 8,791162889 |           |              |
| PCP027983 | 7,375039431 | 7,318949464 | 7,327956767 | 7,930737338 | PCP027983 | XM_009363002 |
| PCP027995 | 7,597456684 | 7,604886762 | 7,824449651 | 7,533952624 | PCP027995 | XM_009356162 |
| PCP027999 | 6,513016928 | 6,705010253 | 7,090959258 | 7,475733431 |           |              |
| PCP028009 | 7,958088658 | 8,458078458 | 9,709083813 | 9,108524457 | PCP028009 | NM_001294363 |
| PCP028015 | 7,186559982 | 6,965784285 | 7,330916878 | 7,602364826 |           |              |
| PCP028016 | 7,8008999   | 7,707359132 | 7,745976779 | 7,442943496 |           |              |
| PCP028026 | 7,478405614 | 7,494495616 | 7,718841075 | 8,103287808 | PCP028026 | XM_008342555 |
| PCP028034 | 7,54689446  | 7,796558821 | 7,868328714 | 8,266786541 | PCP028034 | XM_018646861 |
| PCP028035 | 8,199672345 | 7,928784831 | 7,860031646 | 8,026080745 | PCP028035 | XM_009355286 |
| PCP028043 | 8,326429487 | 8,48651327  | 8,614709844 | 8,380807357 |           |              |
| PCP028045 | 7,691185174 | 7,489205728 | 7,406587689 | 7,528805707 |           |              |
| PCP028054 | 8,241601875 | 8,344295908 | 8,625708843 | 8,653454181 |           |              |
| PCP028057 | 7,473056289 | 7,132679654 | 7,033423002 | 6,824386003 | PCP028057 | XM_018645837 |
| PCP028062 | 7,003714662 | 6,845490051 | 7,222360218 | 7,853808564 | PCP028062 | XM_009350749 |
| PCP028073 | 8,50779464  | 8,103287808 | 8,108524457 | 8,075051225 |           |              |
| PCP028076 | 7,569855608 | 7,695785075 | 7,765998774 | 8,078577814 |           |              |
| PCP028092 | 7,963878669 | 8,108524457 | 8,43325159  | 9,945443836 | PCP028092 | XM_008343259 |
| PCP028094 | 7,711976642 | 8,013071384 | 8,17990909  | 9,009352771 | PCP028094 | XM_008343280 |
| PCP028105 | 7,667679281 | 7,486473046 | 7,54689446  | 7,423494135 | PCP028105 | XM_009368585 |
| PCP028106 | 7,772611496 | 7,660566438 | 7,686500527 | 7,342785837 | PCP028106 | XM_009368583 |
| PCP028107 | 7,360452072 | 7,222360218 | 7,470292816 | 7,087462841 | PCP028107 | XM_009379424 |
| PCP028110 | 8,092757141 | 8,501160452 | 8,503825738 | 8,866258916 |           |              |
| PCP028112 | 7,988684687 | 8,236827423 | 8,108524457 | 8,094500005 |           |              |
| PCP028118 | 7,54689446  | 7,695785075 | 7,589988142 | 7,303780748 | PCP028118 | XM_009368731 |
| PCP028125 | 8,568602197 | 7,928784831 | 8,392317423 | 8,33391564  | PCP028125 | XM_009354274 |
| PCP028131 | 8,479780264 | 8,511752654 | 8,540438054 | 9,057991723 | PCP028131 | XM_008354113 |
| PCP028138 | 7,604886762 | 7,815895594 | 7,930737338 | 8,164906927 | PCP028138 | XM_009370319 |
| PCP028156 | 8,67479253  | 8,791162889 | 8,603626345 | 9,023283079 |           |              |
| PCP028178 | 8,74929961  | 8,478446064 | 8,427648072 | 8,225593068 | PCP028178 | XM_018651619 |
| PCP028197 | 8,530094158 | 8,220765252 | 8,463524373 | 9,011227255 |           |              |
| PCP028198 | 7,597456684 | 7,06608919  | 7,222360218 | 7,125878364 | PCP028198 | XM_008381739 |
| PCP028205 | 8,053491515 | 8,209453366 | 8,183238369 | 8,06608919  | PCP028205 | XM_009341778 |
| PCP028250 | 7,412188747 | 7,549438149 | 7,624466495 | 8,263644792 |           |              |
| PCP028269 | 8,184875343 | 8,21916852  | 8,183238369 | 8,044394119 |           |              |

|           |             |             |             |             |           |              |
|-----------|-------------|-------------|-------------|-------------|-----------|--------------|
| PCP028282 | 7,351645995 | 7,412188747 | 8,049848549 | 7,855927425 | PCP028282 | XM_009373700 |
| PCP028300 | 7,754887502 | 7,796558821 | 7,884658968 | 8,28692734  |           |              |
| PCP028303 | 8,723387907 | 8,784634846 | 8,72904287  | 8,584962501 | PCP028303 | XM_009352619 |
| PCP028333 | 8,06786455  | 7,579919292 | 7,662988741 | 7,022367813 | PCP028333 | XM_018652193 |
| PCP028334 | 8,04072808  | 7,904905525 | 8,247927513 | 7,459431619 |           |              |
| PCP028335 | 7,528805707 | 7,315874125 | 7,552054236 | 7,022367813 | PCP028335 | XM_008369098 |
| PCP028337 | 8,567309664 | 8,353146825 | 8,481113232 | 8,144658243 | PCP028337 | XM_009368426 |
| PCP028351 | 8,080391184 | 7,403693786 | 7,898873426 | 8,440163216 | PCP028351 | XM_008380191 |
| PCP028377 | 8,016808288 | 8,3994702   | 8,262094845 | 8,736976865 | PCP028377 | XM_017331129 |
| PCP028380 | 9,06250492  | 8,646270682 | 8,21916852  | 7,254272787 | PCP028380 | XM_018644228 |
| PCP028423 | 7,169925001 | 7,173227395 | 7,380850638 | 7,866228001 | PCP028423 | XM_009340749 |
| PCP028424 | 6,80309785  | 8,353146825 | 8,30833903  | 8,212715235 |           |              |
| PCP028462 | 7,377904593 | 7,431873638 | 7,357552005 | 7,225641265 | PCP028462 | XM_009371107 |
| PCP028464 | 8,238404739 | 8,003770871 | 8,042589623 | 7,750405521 | PCP028464 | XM_009371105 |
| PCP028467 | 7,146390476 | 7,297649983 | 7,196430001 | 7,139551352 | PCP028467 | XM_009359594 |
| PCP028469 | 8,350187812 | 8,113742166 | 8,273002948 | 8,062477937 | PCP028469 | XM_009359596 |
| PCP028516 | 8,375039431 | 8,511752654 | 8,532667615 | 7,916894583 |           |              |
| PCP028529 | 8,577428828 | 8,784634846 | 8,601139355 | 7,811663685 | PCP028529 | XM_017324520 |
| PCP028533 | 6,564835417 | 6,824386003 | 7,014913158 | 7,222360218 | PCP028533 | XM_008394290 |
| PCP028537 | 8,227230852 | 8,513056419 | 8,805195705 | 9,261319247 | PCP028537 | XM_008384228 |
| PCP028561 | 8,169925001 | 8,154818109 | 8,306836389 | 8,665335917 |           |              |
| PCP028581 | 6,981053471 | 7,094552786 | 6,938638658 | 6,589913261 | PCP028581 | XM_008348814 |
| PCP028604 | 7,757089938 | 7,698149009 | 7,809478757 | 8,269921462 | PCP028604 | XM_009343095 |
| PCP028625 | 8,618385502 | 8,634193917 | 8,64385619  | 9,093628836 | PCP028625 | XM_009336727 |
| PCP028627 | 6,54426899  | 6,321928095 | 6,977279923 | 8,044394119 | PCP028627 | XM_009376507 |
| PCP028647 | 6,50779464  | 6,60481265  | 7,007531912 | 7,318949464 |           |              |
| PCP028674 | 8,493174961 | 8,677120596 | 8,68183575  | 8,46760555  | PCP028674 | XM_009355812 |
| PCP028751 | 7,515699838 | 7,321928095 | 7,231989133 | 6,988684687 | PCP028751 | XR_001952085 |
| PCP028756 | 8,979196518 | 8,315919398 | 8,773699688 | 8,869347076 | PCP028756 | XM_009358003 |
| PCP028833 | 8,499845887 | 8,788979283 | 8,584962501 | 8,370687407 | PCP028833 | XM_009373783 |
| PCP028843 | 7,406587689 | 7,42063398  | 7,662988741 | 8,125826717 | PCP028843 | XR_001954346 |
| PCP028845 | 7,533952624 | 7,677155841 | 8,009380767 | 8,277659361 |           |              |
| PCP028872 | 7,351645995 | 7,497213158 | 7,765998774 | 7,478405614 | PCP028872 | XM_009338024 |
| PCP028883 | 8,103287808 | 8,161535025 | 8,293103743 | 8,636624621 | PCP028883 | XM_009371659 |
| PCP028903 | 8,710806434 | 8,559682997 | 8,535275377 | 8,361943774 | PCP028903 | XM_009341601 |
| PCP028904 | 6,763809907 | 6,677085351 | 6,898812977 | 7,44567705  |           |              |
| PCP028916 | 8,282300792 | 8,360495967 | 8,389437748 | 8,859006685 | PCP028916 | XM_008339313 |
| PCP028917 | 7,400879436 | 7,619633096 | 7,847558521 | 8,146339557 | PCP028917 | XM_009372884 |
| PCP028919 | 6,988684687 | 7,339850003 | 7,658211483 | 8,096293483 | PCP028919 | XM_009372878 |
| PCP028921 | 8,460783512 | 8,246360579 | 8,927777962 | 8,725638921 | PCP028921 | XM_009372875 |
| PCP028924 | 7,263691734 | 7,559721231 | 7,688809791 | 8,309840108 | PCP028924 | XM_008355369 |
| PCP028925 | 8,522267655 | 8,50779464  | 8,603626345 | 9,050746552 | PCP028925 | NM_001328872 |
| PCP028944 | 6,727920455 | 6,845490051 | 7,007531912 | 7,386552314 | PCP028944 | XM_008343938 |
| PCP028951 | 7,003714662 | 7,183188734 | 7,523561956 | 7,63175911  | PCP028951 | XM_008343947 |
| PCP028952 | 6,594996337 | 7,040782866 | 6,72342204  | 7,321928095 | PCP028952 | XM_008343951 |
| PCP028955 | 8,588714636 | 8,489165579 | 8,599912842 | 9,005624549 | PCP028955 | XM_009366918 |

|           |             |             |             |             |           |              |
|-----------|-------------|-------------|-------------|-------------|-----------|--------------|
| PCP028957 | 7,260496187 | 7,894817763 | 7,888743249 | 7,934693407 | PCP028957 | XM_008343960 |
| PCP028958 | 7,321928095 | 7,363433935 | 7,003714662 | 6,594996337 | PCP028958 | XM_008343967 |
| PCP028974 | 6,54426899  | 6,619559738 | 7,080337882 | 7,225641265 | PCP028974 | XM_009337081 |
| PCP028980 | 8,382278171 | 8,460783512 | 8,594959026 | 8,359002767 | PCP028980 | XM_009337092 |
| PCP028987 | 8,288496992 | 8,326429487 | 8,442943496 | 8,82336724  | PCP028987 | XM_009348257 |
| PCP028991 | 8,232037117 | 8,274587815 | 8,533991546 | 8,770399609 | PCP028991 | XM_009335747 |
| PCP029005 | 7,294620749 | 7,531381461 | 7,400879436 | 7,342785837 | PCP029005 | XM_009335760 |
| PCP029007 | 6,777025123 | 7,047996356 | 7,375039431 | 7,71651083  | PCP029007 | XM_009335762 |
| PCP029032 | 8,427648072 | 8,412231097 | 8,598685286 | 9,491853096 | PCP029032 | XM_009358529 |
| PCP029033 | 7,916894583 | 7,725673    | 8,044394119 | 7,866228001 | PCP029033 | XM_009358532 |
| PCP029034 | 7,251056285 | 7,354646096 | 7,426264755 | 7,173227395 | PCP029034 | XM_009358534 |
| PCP029041 | 6,886672074 | 7,007531912 | 7,014913158 | 7,579919292 |           |              |
| PCP029047 | 7,462134139 | 7,711976642 | 8,033423002 | 7,772611496 | PCP029047 | XM_009345315 |
| PCP029061 | 7,101503009 | 6,977279923 | 6,977279923 | 6,594996337 |           |              |
| PCP029080 | 7,967687386 | 8,101555535 | 8,481113232 | 7,834976616 | PCP029080 | XM_009364782 |
| PCP029082 | 8,178266468 | 8,386595423 | 8,649866903 | 8,856954575 |           |              |
| PCP029083 | 7,440204752 | 7,339850003 | 7,826548487 | 8,148069774 | PCP029083 | XM_009364788 |
| PCP029096 | 7,456724026 | 7,129283017 | 7,300764373 | 7,14974712  | PCP029096 | XM_009376947 |
| PCP029103 | 8,071462363 | 8,300718622 | 8,356099782 | 8,665335917 | PCP029103 | XM_009377905 |
| PCP029108 | 7,528805707 | 7,222360218 | 7,238404739 | 6,84962403  |           |              |
| PCP029120 | 8,367764188 | 8,276124405 | 8,299208018 | 8,224001674 | PCP029120 | XM_008339227 |
| PCP029129 | 6,950351762 | 7,176621973 | 7,269874722 | 7,660566438 |           |              |
| PCP029166 | 7,094552786 | 7,101503009 | 7,166615031 | 6,68187088  | PCP029166 | XM_009354581 |
| PCP029171 | 7,478405614 | 7,386552314 | 7,592457037 | 7,357552005 |           |              |
| PCP029178 | 7,646234675 | 6,857980995 | 7,409390936 | 7,354646096 | PCP029178 | XM_008380814 |
| PCP029185 | 7,132679654 | 6,926829678 | 6,95419631  | 6,832890014 | PCP029185 | XM_009346907 |
| PCP029202 | 8,648645193 | 8,673591756 | 9,038013592 | 8,827596761 | PCP029202 | XM_008380841 |
| PCP029209 | 8,283875484 | 8,409390936 | 7,584962501 | 8,717676423 | PCP029209 | NM_001328782 |
| PCP029226 | 6,579994693 | 6,996275749 | 6,988684687 | 7,28845085  | PCP029226 | XM_009346729 |
| PCP029239 | 7,510408147 | 7,759355602 | 8,051643995 | 8,249492747 | PCP029239 | XM_008381746 |
| PCP029251 | 8,277659361 | 8,591223118 | 8,742578916 | 8,815927606 | PCP029251 | XM_018649340 |
| PCP029258 | 8,453970202 | 8,35169016  | 8,291539098 | 8,329437582 | PCP029258 | XM_009378955 |
| PCP029289 | 8,503825738 | 8,692336525 | 8,548166865 | 9,14890869  |           |              |
| PCP029294 | 7,125878364 | 7,71651083  | 8,382278171 | 7,787902559 | PCP029294 | XM_008376268 |
| PCP029306 | 7,398059585 | 7,609769734 | 7,655852677 | 8,122413888 | PCP029306 | XM_009348456 |
| PCP029307 | 7,30679083  | 7,497213158 | 7,412188747 | 7,942514505 |           |              |
| PCP029313 | 7,383704292 | 7,459431619 | 7,572359168 | 7,930737338 |           |              |
| PCP029314 | 8,515699838 | 8,568602197 | 8,922822231 | 9,108524457 | PCP029314 | XM_017337295 |
| PCP029322 | 7,536596918 | 6,918863237 | 7,670089681 | 8,491853096 | PCP029322 | XM_018646237 |
| PCP029329 | 6,741466986 | 6,594996337 | 7,442943496 | 8,174925683 | PCP029329 | XM_009352584 |
| PCP029369 | 8,458078458 | 8,262094845 | 8,214319121 | 8,279239123 | PCP029369 | XM_009381472 |
| PCP029373 | 8,026080745 | 8,141238626 | 8,320439548 | 8,640244936 |           |              |
| PCP029383 | 8,429071922 | 8,437419184 | 8,939579214 | 9,315896762 | PCP029383 | XM_009336952 |
| PCP029389 | 7,007531912 | 6,906890596 | 7,033423002 | 7,552054236 | PCP029389 | XM_008367725 |
| PCP029393 | 8,531381461 | 8,518338423 | 8,770399609 | 8,632995197 | PCP029393 | XM_008356128 |
| PCP029394 | 7,21916852  | 7,189824559 | 7,369204723 | 7,080337882 | PCP029394 | XM_009365673 |



|           |             |             |             |             |           |              |
|-----------|-------------|-------------|-------------|-------------|-----------|--------------|
| PCP029439 | 8,342830273 | 8,354602022 | 8,293103743 | 8,194756854 |           |              |
| PCP029441 | 8,528766645 | 8,282300792 | 8,249492747 | 7,619633096 | PCP029441 | XR_530718    |
| PCP029445 | 7,462134139 | 7,339850003 | 7,297649983 | 7,206232954 | PCP029445 | XM_008360189 |
| PCP029456 | 8,578674597 | 8,95419631  | 8,382278171 | 8,366322214 | PCP029456 | XM_008363913 |
| PCP029462 | 7,189824559 | 7,199672345 | 7,392317423 | 7,932687205 | PCP029462 | XM_009362701 |
| PCP029492 | 7,761551232 | 7,727920455 | 7,597456684 | 7,241554209 |           |              |
| PCP029497 | 8,315919398 | 8,54303182  | 8,495855027 | 8,441574774 | PCP029497 | XM_009343586 |
| PCP029508 | 6,54426899  | 7,169925001 | 7,523561956 | 8,103287808 | PCP029508 | XM_008371293 |
| PCP029513 | 7,276124405 | 7,129283017 | 6,914923239 | 6,732404887 | PCP029513 | XM_009363843 |
| PCP029533 | 6,667750232 | 6,961970533 | 6,824386003 | 7,732472726 | PCP029533 | NM_001294124 |
| PCP029538 | 7,389480771 | 7,50779464  | 7,718841075 | 8,137862104 | PCP029538 | XM_008342350 |
| PCP029539 | 7,624466495 | 7,398059585 | 7,587440004 | 7,406587689 |           |              |
| PCP029554 | 8,732438807 | 8,910882535 | 8,639051236 | 8,893817229 | PCP029554 | XM_008378636 |
| PCP029555 | 8,571107931 | 8,68183575  | 8,612241904 | 8,660602089 | PCP029555 | XM_009362958 |
| PCP029570 | 8,271463028 | 8,263644792 | 8,735826768 | 8,659389441 |           |              |
| PCP029571 | 8,206184105 | 7,975389442 | 8,136119594 | 8,559682997 | PCP029571 | XM_009366662 |
| PCP029593 | 7,087462841 | 7,139551352 | 7,3458044   | 7,700439718 | PCP029593 | XM_009368099 |
| PCP029597 | 8,125826717 | 8,06786455  | 8,181549844 | 8,003770871 | PCP029597 | XM_009368103 |
| PCP029600 | 7,64385619  | 7,577428828 | 7,531381461 | 6,369291982 |           |              |
| PCP029617 | 6,777025123 | 7,297649983 | 7,209453366 | 7,64385619  |           |              |
| PCP029623 | 8,018645301 | 7,315874125 | 7,74819285  | 7,294620749 | PCP029623 | NM_001328983 |
| PCP029631 | 7,254272787 | 7,156538193 | 7,318949464 | 7,750405521 | PCP029631 | XM_009375307 |
| PCP029642 | 7,238404739 | 7,403693786 | 7,554588852 | 8,106798463 | PCP029642 | XM_009361415 |
| PCP029644 | 7,934693407 | 7,648681141 | 7,434628228 | 7,614709844 | PCP029644 | XM_018648196 |
| PCP029652 | 8,087462841 | 8,285402219 | 8,317412614 | 8,722226922 | PCP029652 | XR_001952641 |
| PCP029671 | 6,60481265  | 6,260590275 | 7,818070833 | 7,263691734 | PCP029671 | XM_009345853 |
| PCP029711 | 8,819125283 | 8,440163216 | 8,3994702   | 8,027905997 | PCP029711 | XM_009344724 |
| PCP029712 | 8,14974712  | 7,996219247 | 8,020535537 | 8,046196362 |           |              |
| PCP029723 | 8,189824559 | 8,338379842 | 8,345760055 | 8,733591606 | PCP029723 | XM_008359170 |
| PCP029724 | 8,505136683 | 8,306836389 | 8,350187812 | 7,90285744  | PCP029724 | XM_008379951 |
| PCP029725 | 7,105070402 | 7,132679654 | 7,212666605 | 7,876516947 | PCP029725 | XM_008379821 |
| PCP029760 | 8,243173983 | 8,194756854 | 8,407989993 | 8,146339557 | PCP029760 | XM_018651595 |
| PCP029761 | 7,183188734 | 7,132679654 | 7,451211112 | 7,805227956 | PCP029761 | XM_018646338 |
| PCP029767 | 7,811663685 | 7,725673    | 8,046196362 | 8,540438054 | PCP029767 | XM_008387234 |
| PCP029771 | 8,495855027 | 8,158205728 | 8,101555535 | 8,206184105 | PCP029771 | XM_009339128 |
| PCP029796 | 6,691115365 | 6,841344192 | 7,055282436 | 7,497213158 | PCP029796 | XM_009339181 |
| PCP029812 | 8,011227255 | 8,139551352 | 8,13442632  | 8,566054038 |           |              |
| PCP029828 | 7,291585141 | 7,125878364 | 7,169925001 | 7,018700931 | PCP029828 | XM_009352514 |
| PCP029860 | 7,743689989 | 7,798763389 | 7,894817763 | 8,306836389 | PCP029860 | XM_009351737 |
| PCP029870 | 6,392317423 | 7,956114749 | 7,952275317 | 8,296136161 | PCP029870 | XM_009378746 |
| PCP029911 | 8,56350137  | 8,566054038 | 8,499845887 | 9,033423002 |           |              |
| PCP029916 | 7,990557838 | 8,051643995 | 8,171577143 | 8,577428828 |           |              |
| PCP029917 | 7,725673    | 7,992485211 | 8,139551352 | 8,779161208 |           |              |
| PCP029939 | 7,977279923 | 7,711976642 | 7,622051819 | 7,453929061 |           |              |
| PCP029940 | 6,874428132 | 7,018700931 | 7,17990909  | 7,577428828 |           |              |
| PCP029955 | 7,822284016 | 7,792269724 | 7,963878669 | 8,417852515 | PCP029955 | XM_008390006 |

|           |             |             |             |             |           |              |
|-----------|-------------|-------------|-------------|-------------|-----------|--------------|
| PCP029972 | 7,273049587 | 7,051698368 | 6,87036472  | 6,902917719 | PCP029972 | XM_009339033 |
| PCP029983 | 8,74708524  | 8,853839746 | 8,247927513 | 7,781359714 | PCP029983 | XM_009381004 |
| PCP029987 | 7,894817763 | 7,667679281 | 7,990557838 | 8,477070141 |           |              |
| PCP030010 | 7,044394119 | 7,269874722 | 7,464913269 | 7,979167931 | PCP030010 | XM_009337562 |
| PCP030109 | 7,564759219 | 7,785746699 | 7,577428828 | 7,655852677 | PCP030109 | XM_009347403 |
| PCP030114 | 7,087462841 | 7,186559982 | 7,896816753 | 8,372125027 |           |              |
| PCP030137 | 8,003770871 | 7,826548487 | 8,113742166 | 7,890750668 | PCP030137 | XM_016792276 |
| PCP030138 | 7,254272787 | 7,146390476 | 7,531381461 | 8,171577143 |           |              |
| PCP030147 | 8,103287808 | 7,930737338 | 7,813781191 | 7,499845887 | PCP030147 | XM_009343135 |
| PCP030211 | 7,562242424 | 7,389480771 | 7,977279923 | 7,415065677 |           |              |
| PCP030241 | 7,809478757 | 7,714245518 | 7,940577883 | 7,392317423 | PCP030241 | XM_009349744 |
| PCP030272 | 8,103287808 | 7,83080039  | 7,300764373 | 6,862079387 |           |              |
| PCP030350 | 6,86628983  | 7,111970261 | 7,238404739 | 7,882643049 | PCP030350 | XM_009357448 |
| PCP030353 | 7,451211112 | 7,459431619 | 7,815895594 | 8,058911723 | PCP030353 | XM_018645733 |
| PCP030373 | 8,637820329 | 8,54303182  | 8,636624621 | 9,044394119 |           |              |
| PCP030379 | 7,824449651 | 8,027905997 | 8,318904285 | 7,912889336 | PCP030379 | XM_018642638 |
| PCP030397 | 7,146390476 | 7,047996356 | 7,351645995 | 7,022367813 | PCP030397 | XM_009379231 |
| PCP030406 | 7,026025399 | 7,142923928 | 7,386552314 | 7,87036472  | PCP030406 | NM_001328778 |
| PCP030407 | 7,244791942 | 6,926829678 | 7,251056285 | 6,794415866 | PCP030407 | NM_001328779 |
| PCP030416 | 6,958030641 | 6,906890596 | 7,244791942 | 6,534030467 | PCP030416 | XM_008381048 |
| PCP030440 | 7,209453366 | 7,564759219 | 7,723353774 | 7,765998774 | PCP030440 | XM_008381088 |
| PCP030467 | 7,312882955 | 7,440204752 | 7,28845085  | 7,235248379 |           |              |
| PCP030480 | 8,573647187 | 8,5824431   | 8,717676423 | 9,06608919  |           |              |
| PCP030493 | 6,946379968 | 7,062531903 | 7,257387843 | 7,864186145 | PCP030493 | XM_009362189 |
| PCP030498 | 7,489205728 | 7,470292816 | 7,686500527 | 7,260496187 |           |              |
| PCP030499 | 7,526147081 | 7,389480771 | 7,14974712  | 7,768184325 | PCP030499 | XM_009365233 |
| PCP030500 | 7,619633096 | 7,176621973 | 7,354646096 | 7,231989133 | PCP030500 | XM_009365231 |
| PCP030516 | 7,705079392 | 7,44567705  | 7,327956767 | 7,481153605 | PCP030516 | XM_018648981 |
| PCP030551 | 6,705010253 | 6,862079387 | 6,653490009 | 7,431873638 | PCP030551 | XM_008391575 |
| PCP030553 | 8,101555535 | 8,21757002  | 8,266786541 | 8,70276142  | PCP030553 | XM_008391577 |
| PCP030554 | 8,703903573 | 8,44431092  | 8,483815777 | 8,481113232 | PCP030554 | XM_008352728 |
| PCP030559 | 7,351645995 | 8,09976859  | 7,688809791 | 6,564835417 | PCP030559 | XM_008391588 |
| PCP030565 | 7,730164413 | 7,910912508 | 8,057071136 | 8,323415108 | PCP030565 | XM_008391594 |
| PCP030573 | 7,186559982 | 7,653418353 | 7,587440004 | 7,693486957 | PCP030573 | XM_021959164 |
| PCP030580 | 5,57500972  | 7,473056289 | 8,257387843 | 12,72238064 | PCP030580 | XM_009341717 |
| PCP030584 | 8,438791853 | 8,637820329 | 8,782441329 | 8,973467779 | PCP030584 | XM_009341762 |
| PCP030610 | 8,202956379 | 8,016808288 | 8,254225537 | 7,868328714 | PCP030610 | XM_009373675 |
| PCP030623 | 7,95419631  | 7,354646096 | 8,031604721 | 7,241554209 | PCP030623 | XM_008370140 |
| PCP030635 | 7,090959258 | 7,552054236 | 7,973439079 | 9,086587411 | PCP030635 | XM_008367509 |
| PCP030647 | 7,451211112 | 7,557119022 | 7,908872939 | 8,471675214 | PCP030647 | XM_008380402 |
| PCP030651 | 8,125826717 | 9,063395081 | 8,43325159  | 7,820178962 | PCP030651 | XM_009349836 |
| PCP030678 | 8,326429487 | 8,323415108 | 8,156487632 | 8,189824559 | PCP030678 | XM_008379016 |
| PCP030705 | 8,515699838 | 8,526186214 | 8,654636029 | 9,202123824 | PCP030705 | XM_017324981 |
| PCP030714 | 7,090959258 | 7,369204723 | 7,193081765 | 6,777025123 | PCP030714 | XM_009372385 |
| PCP030716 | 8,536558066 | 8,3994702   | 8,125826717 | 7,510408147 | PCP030716 | XM_009372387 |
| PCP030726 | 7,908872939 | 7,761551232 | 7,698149009 | 7,50247382  | PCP030726 | XM_008383448 |

|           |             |             |             |             |           |              |
|-----------|-------------|-------------|-------------|-------------|-----------|--------------|
| PCP030731 | 7,973439079 | 8,103287808 | 8,089212109 | 8,485145023 | PCP030731 | XM_009353345 |
| PCP030733 | 8,463524373 | 8,622051819 | 8,739206792 | 9,169925001 | PCP030733 | XM_009353347 |
| PCP030745 | 7,426264755 | 6,820178962 | 7           | 6,464831606 | PCP030745 | XM_018646443 |
| PCP030752 | 8,795487741 | 8,649866903 | 8,706219712 | 8,530094158 |           |              |
| PCP030758 | 7,333870928 | 7,459431619 | 7,491853096 | 7,166615031 |           |              |
| PCP030779 | 8,32494558  | 8,479780264 | 8,482485305 | 8,87036472  | PCP030779 | XM_009351105 |
| PCP030780 | 7,22881869  | 7,241554209 | 7,212666605 | 7,721099189 | PCP030780 | XM_009351107 |
| PCP030790 | 7,785746699 | 7,938579853 | 7,813781191 | 7,772611496 | PCP030790 | XM_008380898 |
| PCP030791 | 8,220765252 | 8,50779464  | 8,742578916 | 9,053464362 |           |              |
| PCP030817 | 8,448446735 | 8,283875484 | 8,403736386 | 8,252665432 | PCP030817 | XM_008356829 |
| PCP030822 | 8,233619677 | 7,815895594 | 8,186510462 | 7,354646096 | PCP030822 | XM_009348974 |
| PCP030823 | 7,518299077 | 7,667679281 | 7,866228001 | 7,574934058 | PCP030823 | XM_009348975 |
| PCP030868 | 8,615923847 | 8,574896225 | 8,67479253  | 9,031577154 |           |              |
| PCP030872 | 7,8008999   | 7,592457037 | 7,914863459 | 8,130982335 | PCP030872 | XM_009371980 |
| PCP030888 | 8,373604714 | 8,21757002  | 8,191454081 | 7,837123296 | PCP030888 | XM_009366687 |
| PCP030893 | 7,709635275 | 8,130982335 | 8,495855027 | 8,677120596 | PCP030893 | XM_009359920 |
| PCP030904 | 6,235152624 | 6,409390936 | 6,946379968 | 7,807354922 | PCP030904 | XM_009347201 |
| PCP030910 | 8,687655621 | 8,54303182  | 8,329437582 | 8,830768706 | PCP030910 | XM_009380508 |
| PCP030915 | 8,937609223 | 8,682994584 | 8,861086906 | 8,821231873 |           |              |
| PCP030924 | 7,389480771 | 7,478405614 | 7,646234675 | 8,154818109 | PCP030924 | XR_664385    |
| PCP030931 | 8,832890014 | 8,659389441 | 8,721099189 | 8,725638921 | PCP030931 | XM_008360111 |
| PCP030933 | 7,069637728 | 7,459431619 | 7,597456684 | 8,001858526 |           |              |
| PCP030955 | 7,456724026 | 7,992485211 | 7,87036472  | 7,426264755 | PCP030955 | XM_009342301 |
| PCP030957 | 7,483815777 | 7,754887502 | 7,473056289 | 7,136170875 | PCP030957 | XM_009342310 |
| PCP030975 | 7,908872939 | 8,19313106  | 8,106798463 | 8,696967526 |           |              |
| PCP030979 | 6,745909573 | 7,173227395 | 7,247927513 | 7,743689989 | PCP030979 | XM_018648999 |
| PCP030992 | 8,08390476  | 7,946438456 | 8,174925683 | 8,607330314 | PCP030992 | XM_008350106 |
| PCP030993 | 8,383704292 | 8,125826717 | 8,548166865 | 8,463524373 | PCP030993 | XM_008381819 |
| PCP031004 | 7,646234675 | 7,366322214 | 7,483815777 | 7,251056285 | PCP031004 | XM_008347289 |
| PCP031020 | 8,687655621 | 8,655816908 | 8,732438807 | 8,601139355 | PCP031020 | XM_018649542 |
| PCP031027 | 7,572359168 | 7,351645995 | 7,554588852 | 8,323415108 | PCP031027 | XM_009380032 |
| PCP031029 | 7,969645536 | 8,202956379 | 8,020535537 | 8,715378619 | PCP031029 | XM_009379308 |
| PCP031053 | 7,691185174 | 7,750405521 | 7,714245518 | 8,173277373 | PCP031053 | XM_009377598 |
| PCP031070 | 6,86628983  | 6,667750232 | 7,276124405 | 7,403693786 | PCP031070 | XM_018647588 |
| PCP031105 | 7,403693786 | 7,080337882 | 6,862079387 | 6,254178286 | PCP031105 | XM_009380891 |
| PCP031108 | 7,892816    | 7,884658968 | 8,288496992 | 8,652235507 |           |              |
| PCP031111 | 7,958088658 | 7,872397856 | 8,225593068 | 8,70158371  | PCP031111 | XM_008359326 |
| PCP031135 | 8,317412614 | 8,28077077  | 8,588714636 | 8,409390936 | PCP031135 | XM_009370349 |
| PCP031155 | 6,754887502 | 7,06608919  | 7,044394119 | 7,429030064 |           |              |
| PCP031165 | 7,619633096 | 7,589988142 | 7,489205728 | 8,096293483 | PCP031165 | XM_009381013 |
| PCP031184 | 6,705010253 | 6,942514505 | 6,961970533 | 7,426264755 | PCP031184 | XM_008353598 |
| PCP031186 | 7,146390476 | 7,564759219 | 8,055282436 | 8,241601875 | PCP031186 | XM_017322507 |
| PCP031220 | 8,60855054  | 8,675957033 | 8,666508075 | 8,19313106  | PCP031220 | XM_018643715 |
| PCP031222 | 7,723353774 | 7,798763389 | 8,206184105 | 8,904875427 | PCP031222 | XM_009341449 |
| PCP031249 | 7,247927513 | 6,977279923 | 6,934634441 | 7,711976642 | PCP031249 | XM_009364145 |
| PCP031252 | 9,05709822  | 8,910882535 | 8,86727874  | 7,730164413 | PCP031252 | XM_009336773 |

|           |             |             |             |             |           |              |
|-----------|-------------|-------------|-------------|-------------|-----------|--------------|
| PCP031267 | 6,80309785  | 7,473056289 | 8,230404783 | 9,083027168 | PCP031267 | XM_018649615 |
| PCP031271 | 7,805227956 | 7,975389442 | 8,101555535 | 8,312882955 |           |              |
| PCP031317 | 7,17990909  | 7,183188734 | 7,285402219 | 6,828707735 | PCP031317 | XM_009380272 |
| PCP031325 | 7,007531912 | 7,118941073 | 7,528805707 | 7,648681141 | PCP031325 | XM_009378544 |
| PCP031330 | 7,940577883 | 8,078577814 | 7,916894583 | 8,376472723 | PCP031330 | XM_009365176 |
| PCP031335 | 7,626950122 | 7,688809791 | 7,839203788 | 8,233619677 | PCP031335 | XM_009365180 |
| PCP031338 | 8,569855608 | 8,687655621 | 8,772578508 | 9,026053072 | PCP031338 | XM_018648968 |
| PCP031339 | 7,037052702 | 7,199672345 | 7,426264755 | 7,007531912 | PCP031339 | XM_018648969 |
| PCP031352 | 8,042589623 | 8,386595423 | 8,460783512 | 8,184875343 |           |              |
| PCP031354 | 7,589988142 | 7,759355602 | 7,783522135 | 8,437419184 |           |              |
| PCP031357 | 8,74819285  | 8,841312739 | 8,554588852 | 8,646270682 |           |              |
| PCP031361 | 7,577428828 | 7,520972191 | 7,841281284 | 8,196380818 | PCP031361 | XM_018651243 |
| PCP031370 | 7,351645995 | 7,417852515 | 8,315919398 | 8,606109055 | PCP031370 | XM_009350556 |
| PCP031373 | 7,944448531 | 7,392317423 | 7,282347131 | 7,129283017 | PCP031373 | XM_009360449 |
| PCP031391 | 7,244791942 | 7,241554209 | 7,677155841 | 7,969645536 |           |              |
| PCP031397 | 7,315874125 | 6,910852562 | 6,815959618 | 6,81159947  |           |              |
| PCP031410 | 8,184875343 | 8,166564822 | 8,238404739 | 8,70276142  |           |              |
| PCP031424 | 8,370687407 | 8,431831861 | 8,594959026 | 8,861086906 | PCP031424 | XM_009379891 |
| PCP031439 | 7,007531912 | 7,369204723 | 7,115511897 | 6,72342204  | PCP031439 | XM_009381053 |
| PCP031451 | 8,427648072 | 8,236827423 | 8,347267018 | 8,146339557 | PCP031451 | XM_020565225 |
| PCP031453 | 7,357552005 | 7,646234675 | 7,922851957 | 7,996219247 |           |              |
| PCP031469 | 8,042589623 | 8,073231127 | 8,020535537 | 8,005624549 | PCP031469 | XM_009367417 |
| PCP031484 | 8,290018847 | 7,849686575 | 8,407989993 | 9,302250498 | PCP031484 | XM_008366373 |
| PCP031488 | 7,554588852 | 7,607330314 | 7,908872939 | 7,617136829 | PCP031488 | XM_008351660 |
| PCP031492 | 8,163247124 | 8,08390476  | 8,057071136 | 7,910912508 |           |              |
| PCP031493 | 8,577428828 | 8,303780748 | 8,354602022 | 8,458078458 | PCP031493 | XM_009340098 |
| PCP031514 | 7,83080039  | 7,672425342 | 7,46760555  | 7,64385619  | PCP031514 | XM_008356426 |
| PCP031518 | 7,64385619  | 7,403693786 | 7,686500527 | 7,369204723 | PCP031518 | XM_009335986 |
| PCP031520 | 7,426264755 | 7,528805707 | 7,318949464 | 7,403693786 | PCP031520 | XM_009335988 |
| PCP031536 | 7,763743526 | 7,222360218 | 6,87036472  | 6,497133304 | PCP031536 | XM_017336038 |
| PCP031547 | 8,813781191 | 8,441574774 | 8,46760555  | 7,910912508 | PCP031547 | XM_018652348 |
| PCP031562 | 7,834976616 | 8,383704292 | 8,75043902  | 9,069664578 | PCP031562 | XM_009350678 |
| PCP031571 | 8,227230852 | 8,181549844 | 8,136119594 | 8,533991546 |           |              |
| PCP031572 | 7,058857621 | 7,139551352 | 7,315874125 | 7,741466986 | PCP031572 | XM_017323727 |
| PCP031587 | 7,173227395 | 7,142923928 | 7,206232954 | 6,691115365 | PCP031587 | XM_018647899 |
| PCP031591 | 7,904905525 | 7,677155841 | 7,357552005 | 7,136170875 | PCP031591 | XM_009379413 |
| PCP031598 | 7,54689446  | 7,961912672 | 7,707359132 | 6,64385619  | PCP031598 | XM_009345347 |
| PCP031614 | 8,436003553 | 8,323415108 | 8,477070141 | 8,842350343 |           |              |
| PCP031668 | 6,857980995 | 6,727920455 | 6,841344192 | 7,486473046 | PCP031668 | XM_009380571 |
| PCP031684 | 7,888743249 | 7,743689989 | 8,018645301 | 7,513095909 | PCP031684 | XM_018646986 |
| PCP031690 | 7,448488033 | 7,318949464 | 7,206232954 | 6,988684687 | PCP031690 | XM_018651433 |
| PCP031705 | 7,22881869  | 7,014913158 | 6,658211483 | 6,619559738 | PCP031705 | XM_009356639 |
| PCP031767 | 8,658211483 | 8,625708843 | 8,631795481 | 9,188168462 |           |              |
| PCP031781 | 7,448488033 | 7,478405614 | 7,30679083  | 7,186559982 | PCP031781 | XM_008370937 |
| PCP031811 | 7,389480771 | 7,932687205 | 7,523561956 | 7,473056289 | PCP031811 | XM_009352290 |
| PCP031819 | 8,593689902 | 8,130982335 | 8,252665432 | 7,975389442 | PCP031819 | XM_009353431 |

|           |             |             |             |             |           |              |
|-----------|-------------|-------------|-------------|-------------|-----------|--------------|
| PCP031860 | 8,667714757 | 8,596189756 | 8,623259662 | 8,382278171 | PCP031860 | XM_009344604 |
| PCP031885 | 7,700439718 | 7,557119022 | 7,567347696 | 7,354646096 | PCP031885 | XM_018649973 |
| PCP031894 | 7,321928095 | 7,244791942 | 7,260496187 | 7,790055203 | PCP031894 | XM_009353831 |
| PCP031928 | 6,857980995 | 6,853870927 | 7,22881869  | 7,478405614 | PCP031928 | XM_008345935 |
| PCP031950 | 8,77478706  | 8,87958325  | 8,84862294  | 8,718806834 | PCP031950 | XM_009367240 |
| PCP031983 | 8,204571144 | 7,665335917 | 7,752681699 | 8,462175047 | PCP031983 | XM_009379407 |
| PCP031990 | 8,533991546 | 8,501160452 | 8,868297843 | 9,155653112 |           |              |
| PCP032019 | 8,796591265 | 8,710806434 | 8,757123282 | 8,710806434 |           |              |
| PCP032069 | 8,511752654 | 8,532667615 | 8,601139355 | 9,082149041 |           |              |
| PCP032102 | 8,350187812 | 8,291539098 | 8,273002948 | 8,171577143 |           |              |
| PCP032162 | 7,818070833 | 7,87036472  | 8,003770871 | 8,395191361 |           |              |
| PCP032175 | 8,890781061 | 8,463524373 | 8,225593068 | 8,227230852 | PCP032175 | XM_018645127 |
| PCP032178 | 8,060695932 | 7,711976642 | 8,020535537 | 7,61227877  | PCP032178 | XM_009347990 |
| PCP032179 | 7,851749041 | 7,607330314 | 7,662988741 | 7,206232954 | PCP032179 | XM_009347952 |
| PCP032183 | 8,576181982 | 8,46760555  | 8,81483878  | 9,027905997 | PCP032183 | XM_009348173 |
| PCP032184 | 7,202907418 | 7,28845085  | 7,257387843 | 7,062531903 |           |              |
| PCP032189 | 8,288496992 | 8,447083226 | 8,615923847 | 8,828676005 | PCP032189 | XM_008379457 |
| PCP032192 | 7,653418353 | 7,478405614 | 7,739240553 | 8,164906927 |           |              |
| PCP032228 | 8,022367813 | 8,329437582 | 8,207844058 | 8,239980333 | PCP032228 | XM_017331225 |
| PCP032260 | 8,603626345 | 8,518338423 | 8,736976865 | 8,975360779 | PCP032260 | XM_009363613 |
| PCP032292 | 8,447083226 | 8,819125283 | 8,732438807 | 8,845490051 | PCP032292 | XM_009343229 |
| PCP032444 | 6,961970533 | 7,029784146 | 7,279192684 | 8,049848549 | PCP032444 | XM_009361276 |
| PCP032450 | 7,906890596 | 8,049848549 | 8,013071384 | 7,984874125 | PCP032450 | XM_018649827 |
| PCP032498 | 7,058857621 | 7,366322214 | 8,382278171 | 8,073231127 | PCP032498 | XM_008376152 |
| PCP032512 | 7,42063398  | 7,098032083 | 7,285402219 | 7,044394119 |           |              |
| PCP032534 | 7,360452072 | 7,670089681 | 7,602364826 | 8,125826717 |           |              |
| PCP032539 | 7,21916852  | 7,431873638 | 7,730164413 | 8,103287808 |           |              |
| PCP032550 | 6,691115365 | 6,84962403  | 7,022367813 | 7,330916878 |           |              |
| PCP032576 | 8,730198386 | 8,317412614 | 8,173277373 | 8,222408523 |           |              |
| PCP032579 | 8,417852515 | 8,816983623 | 8,78571401  | 9,108524457 |           |              |
| PCP032602 | 8,495855027 | 8,235200503 | 8,470333494 | 8,429071922 | PCP032602 | XM_009341008 |
| PCP032604 | 8,436003553 | 8,363390129 | 8,43325159  | 9,121533517 | PCP032604 | XM_017327798 |
| PCP032610 | 8,30833903  | 8,441574774 | 8,497173232 | 8,805195705 |           |              |
| PCP032616 | 8,176572111 | 8,628153873 | 8,689997971 | 8,641437649 |           |              |
| PCP032626 | 8,241601875 | 8,376472723 | 8,348728154 | 8,141238626 |           |              |
| PCP032642 | 7,531381461 | 7,451211112 | 7,554588852 | 7,251056285 | PCP032642 | XM_009359158 |
| PCP032789 | 7,235248379 | 7,251056285 | 7,61227877  | 7,333870928 | PCP032789 | XM_009360340 |
| PCP032791 | 8,62450305  | 8,571107931 | 8,572397068 | 8,960001932 | PCP032791 | XR_668950    |
| PCP032819 | 8,277659361 | 8,581200582 | 8,5824431   | 8,935666001 |           |              |
| PCP032827 | 7,665335917 | 7,754887502 | 7,552054236 | 8,115459877 |           |              |
| PCP032871 | 7,562242424 | 7,609769734 | 7,62935662  | 8,071462363 | PCP032871 | XM_009374920 |
| PCP032873 | 8,373604714 | 8,388017285 | 8,420676082 | 8,341318667 |           |              |
| PCP032893 | 8,406545173 | 8,106798463 | 7,88062431  | 7,956114749 | PCP032893 | XM_009351195 |
| PCP032907 | 8,053491515 | 8,168270966 | 8,375039431 | 9,07325791  |           |              |
| PCP032923 | 7,695785075 | 7,705079392 | 7,515699838 | 8,169925001 |           |              |
| PCP032932 | 8,594959026 | 8,540438054 | 8,74708524  | 9,237616296 |           |              |

|           |             |             |             |             |           |              |
|-----------|-------------|-------------|-------------|-------------|-----------|--------------|
| PCP033027 | 7,176621973 | 7,266786541 | 7,142923928 | 7,693486957 |           |              |
| PCP033080 | 7,297649983 | 7,383704292 | 7,515699838 | 7,212666605 | PCP033080 | XM_009348643 |
| PCP033090 | 6,886672074 | 6,918863237 | 6,95419631  | 7,743689989 | PCP033090 | XM_008394930 |
| PCP033092 | 7,285402219 | 7,129283017 | 7,257387843 | 6,705010253 |           |              |
| PCP033094 | 8,499845887 | 8,598685286 | 8,772578508 | 9,031577154 | PCP033094 | XM_008387056 |
| PCP033096 | 8,550746785 | 8,321928095 | 8,422064766 | 8,189824559 | PCP033096 | XM_008351519 |
| PCP033107 | 6,878602742 | 6,890811455 | 7,231989133 | 8,271463028 | PCP033107 | XM_009353284 |
| PCP033110 | 7,781359714 | 7,462134139 | 7,892816    | 7,651051691 | PCP033110 | XM_009353258 |
| PCP033112 | 8,640244936 | 8,460783512 | 8,721099189 | 9,218369492 | PCP033112 | XM_018646421 |
| PCP033128 | 8,84024291  | 8,174925683 | 8,422064766 | 8,020535537 | PCP033128 | XM_009367360 |
| PCP033132 | 6,54426899  | 6,481072857 | 7,300764373 | 8,222408523 | PCP033132 | XM_009363028 |
| PCP033176 | 7,660566438 | 7,597456684 | 7,582480735 | 8,28077077  |           |              |
| PCP033183 | 8,09976859  | 8,336863563 | 7,904905525 | 7,202907418 |           |              |
| PCP033188 | 7,977279923 | 7,936637939 | 8,137862104 | 8,420676082 |           |              |
| PCP033195 | 7,50517639  | 7,206232954 | 7,473056289 | 7,855927425 |           |              |
| PCP033198 | 7,572359168 | 7,798763389 | 7,834976616 | 8,125826717 | PCP033198 | XM_009370210 |
| PCP033201 | 6,777025123 | 8,520932916 | 8,631795481 | 8,491853096 | PCP033201 | XM_018650071 |
| PCP033217 | 5,746043983 | 6,414981143 | 7,166615031 | 8,243173983 | PCP033217 | XM_009373639 |
| PCP033219 | 6,965784285 | 7,029784146 | 6,759289016 | 6,807354922 | PCP033219 | XM_018652392 |
| PCP033239 | 7,714245518 | 7,693486957 | 7,698149009 | 8,269921462 | PCP033239 | XM_009347165 |
| PCP033246 | 7,372168569 | 6,918863237 | 6,750472519 | 6,54426899  | PCP033246 | XM_009373037 |
| PCP033264 | 7,872397856 | 7,832890014 | 7,914863459 | 8,369248353 |           |              |
| PCP033283 | 7,263691734 | 7,202907418 | 6,86628983  | 7,018700931 | PCP033283 | XM_009342635 |
| PCP033414 | 7,183188734 | 6,772545519 | 6,894817763 | 6,658211483 | PCP033414 | XM_009374524 |
| PCP033421 | 6,03716255  | 6,183288001 | 7,672425342 | 7,798763389 | PCP033421 | XM_008379846 |
| PCP033439 | 6,862079387 | 7,029784146 | 7,363433935 | 8,342830273 |           |              |
| PCP033481 | 7,173227395 | 7,169925001 | 6,662917555 | 7,700439718 | PCP033481 | XM_009339388 |
| PCP033523 | 7,604886762 | 7,641473777 | 7,653418353 | 8,106798463 |           |              |
| PCP033538 | 7,212666605 | 7,153095972 | 7,366322214 | 7,77036657  | PCP033538 | XM_009353077 |
| PCP033600 | 7,111970261 | 7,470292816 | 7,822284016 | 8,382278171 | PCP033600 | XM_008350367 |
| PCP033609 | 6,97349648  | 7,105070402 | 6,918863237 | 7,434628228 |           |              |
| PCP033630 | 7,497213158 | 7,366322214 | 7,691185174 | 8,144658243 | PCP033630 | XM_009339849 |
| PCP033657 | 8,294620749 | 8,252665432 | 8,241601875 | 8,709669735 |           |              |
| PCP033660 | 7,007531912 | 7,209453366 | 7,442943496 | 7,839203788 |           |              |
| PCP033700 | 7,007531912 | 7,118941073 | 7,417852515 | 7,125878364 | PCP033700 | XM_009380354 |
| PCP033765 | 8,510447709 | 8,497173232 | 8,794415866 | 9,197216693 | PCP033765 | XM_008377886 |
| PCP033793 | 7,108524457 | 7,483815777 | 7,111970261 | 6,222456826 | PCP033793 | XM_009342438 |
| PCP033798 | 7,698149009 | 7,285402219 | 7,50247382  | 7,303780748 |           |              |
| PCP033800 | 7,996219247 | 7,845490051 | 8,144658243 | 7,900866808 | PCP033800 | XM_009374085 |
| PCP033833 | 7,574934058 | 7,564759219 | 8,04072808  | 8,080391184 |           |              |
| PCP033848 | 8,094500005 | 8,118941073 | 8,249492747 | 8,611024797 | PCP033848 | XR_665987    |
| PCP033850 | 7,71651083  | 7,992485211 | 7,847558521 | 8,359002767 |           |              |
| PCP033868 | 8,700439718 | 8,623259662 | 8,613494819 | 8,515699838 | PCP033868 | XM_009359948 |
| PCP033890 | 8,714245518 | 8,526186214 | 8,56350137  | 9,283088353 |           |              |
| PCP033934 | 8,220765252 | 8,311385042 | 8,309840108 | 8,033423002 | PCP033934 | XM_009339009 |
| PCP033962 | 7,051698368 | 7,062531903 | 7,153095972 | 7,670089681 | PCP033962 | XM_009367582 |

|           |             |             |             |             |           |              |
|-----------|-------------|-------------|-------------|-------------|-----------|--------------|
| PCP033989 | 7,28845085  | 7,303780748 | 7,244791942 | 6,882643049 | PCP033989 | XR_001953124 |
| PCP033998 | 7,297649983 | 7,674757228 | 7,695785075 | 7,549438149 |           |              |
| PCP034140 | 8,273002948 | 8,257387843 | 8,139551352 | 8,588714636 | PCP034140 | XM_008351817 |
| PCP034153 | 7,327956767 | 7,06608919  | 6,950351762 | 7,018700931 |           |              |
| PCP034170 | 8,400879436 | 8,482485305 | 8,733591606 | 9,274564521 | PCP034170 | XM_009338093 |
| PCP034191 | 7,225641265 | 7,403693786 | 7,189824559 | 6,790120385 | PCP034191 | XM_009351549 |
| PCP034196 | 7,787902559 | 7,886733033 | 8,194756854 | 8,531381461 | PCP034196 | XM_009344000 |
| PCP034204 | 8,742578916 | 8,794415866 | 8,768184325 | 8,499845887 | PCP034204 | XM_009342990 |
| PCP034404 | 7,398059585 | 7,434628228 | 8,183238369 | 7,193081765 | PCP034404 | XM_018650233 |
| PCP034421 | 7,193081765 | 6,922792504 | 7,029784146 | 7,562242424 |           |              |
| PCP034453 | 7,8008999   | 7,727920455 | 8,098032083 | 8,385129006 |           |              |
| PCP034475 | 6,599912842 | 6,579994693 | 7,202907418 | 7,386552314 | PCP034475 | XM_009380848 |
| PCP034493 | 7,757089938 | 7,803033252 | 7,866228001 | 8,297695831 |           |              |
| PCP034497 | 8,303780748 | 8,406545173 | 8,698114274 | 9,158180476 | PCP034497 | XM_009345513 |
| PCP034524 | 8,163247124 | 8,031604721 | 8,194756854 | 8,520932916 | PCP034524 | XM_009369321 |
| PCP034527 | 7,08395793  | 6,878602742 | 7,040782866 | 7,667679281 |           |              |
| PCP034645 | 6,459431619 | 6,777025123 | 7,156538193 | 7,136170875 | PCP034645 | XM_009373347 |
| PCP034650 | 8,649866903 | 8,622051819 | 8,649866903 | 8,485145023 | PCP034650 | XM_008339822 |
| PCP034660 | 7,986809101 | 6,351734323 | 8,115459877 | 7,186559982 |           |              |
| PCP034679 | 7,872397856 | 7,360452072 | 7,752681699 | 7,324900589 | PCP034679 | XM_018649220 |
| PCP034714 | 6,420718183 | 6,950351762 | 7,146390476 | 6,981053471 |           |              |
| PCP034716 | 7,451211112 | 7,779194046 | 7,607330314 | 7,541716163 | PCP034716 | XM_009365406 |
| PCP034718 | 7,792269724 | 7,790055203 | 8,014968933 | 8,382278171 |           |              |
| PCP034719 | 8,120652609 | 8,198052084 | 8,456682963 | 8,751544059 |           |              |
| PCP034739 | 7,431873638 | 7,489205728 | 7,651051691 | 8,031604721 |           |              |
| PCP034745 | 8,225593068 | 8,350187812 | 8,402287298 | 8,739206792 | PCP034745 | XM_009365372 |
| PCP034752 | 8,309840108 | 8,163247124 | 8,130982335 | 8,166564822 | PCP034752 | XM_009365793 |
| PCP034769 | 7,047996356 | 7,30679083  | 7,28845085  | 7,658211483 | PCP034769 | XM_008371565 |
| PCP034780 | 8,695819867 | 8,382278171 | 8,50779464  | 8,573647187 | PCP034780 | XM_009359219 |
| PCP034800 | 7,156538193 | 7,309885571 | 7,478405614 | 7,920829209 | PCP034800 | XR_666931    |
| PCP034806 | 7,567347696 | 7,303780748 | 7,28845085  | 7,315874125 | PCP034806 | XM_009375127 |
| PCP034824 | 6,99242856  | 7,105070402 | 7,189824559 | 6,709704193 |           |              |
| PCP034859 | 7,080337882 | 6,754887502 | 7,577428828 | 7,622051819 | PCP034859 | XM_008384297 |
| PCP034936 | 7,389480771 | 7,369204723 | 7,533952624 | 7,22881869  |           |              |
| PCP034957 | 7,533952624 | 8,007475849 | 8,069691427 | 8,375039431 |           |              |
| PCP034993 | 8,202956379 | 8,174925683 | 8,338379842 | 8,682994584 |           |              |
| PCP035053 | 6,97349648  | 6,781359714 | 7,040782866 | 7,451211112 |           |              |
| PCP035058 | 7,910912508 | 7,303780748 | 8,173277373 | 7,92677039  | PCP035058 | XM_017332417 |
| PCP035064 | 7,118941073 | 7,626950122 | 8,186510462 | 9,202931899 | PCP035064 | XM_021977884 |
| PCP035107 | 7,383704292 | 7,559721231 | 7,73470962  | 8,001858526 | PCP035107 | XR_001787405 |
| PCP035113 | 8,345760055 | 8,495855027 | 8,659389441 | 9,116343961 | PCP035113 | XM_018649358 |
| PCP035115 | 7,639015048 | 7,440204752 | 7,523561956 | 7,206232954 | PCP035115 | XM_009371556 |
| PCP035116 | 7,022367813 | 6,984931073 | 7,146390476 | 6,768184325 | PCP035116 | XM_009371551 |
| PCP035150 | 7,890750668 | 8,003770871 | 7,714245518 | 7,772611496 |           |              |
| PCP035241 | 8,598685286 | 8,780277286 | 8,54689446  | 8,708497652 | PCP035241 | XM_018642596 |
| PCP035287 | 8,626913629 | 8,489165579 | 8,550746785 | 8,526186214 | PCP035287 | XM_009341476 |

|           |             |             |             |             |           |              |
|-----------|-------------|-------------|-------------|-------------|-----------|--------------|
| PCP035326 | 7,324900589 | 7,459431619 | 7,898873426 | 8,375039431 | PCP035326 | XM_009362864 |
| PCP035332 | 6,475733431 | 6,977279923 | 7,222360218 | 7,739240553 | PCP035332 | XM_009356960 |
| PCP035409 | 6,108524457 | 6,260590275 | 6,763809907 | 8,45532722  | PCP035409 | XR_669584    |
| PCP035444 | 8,283875484 | 8,204571144 | 8,233619677 | 8,078577814 | PCP035444 | XM_009344114 |
| PCP035541 | 7,691185174 | 7,257387843 | 7,489205728 | 7,938579853 |           |              |
| PCP035559 | 8,089212109 | 8,441574774 | 9,092757141 | 9,641455713 | PCP035559 | XM_009339319 |
| PCP035592 | 7,549438149 | 7,459431619 | 7,3458044   | 7,357552005 | PCP035592 | XM_009372999 |
| PCP035594 | 6,81159947  | 7,094552786 | 7,222360218 | 7,750405521 |           |              |
| PCP035604 | 7,982993575 | 7,874489611 | 9,029756544 | 9,151447887 |           |              |
| PCP035611 | 8,263644792 | 8,055282436 | 8,118941073 | 8,144658243 | PCP035611 | XM_008349278 |
| PCP035615 | 7,994353437 | 7,805227956 | 7,855927425 | 7,695785075 | PCP035615 | XM_009336462 |
| PCP035621 | 7,125878364 | 6,886672074 | 6,97349648  | 6,918863237 | PCP035621 | XM_009338027 |
| PCP035623 | 8,252665432 | 8,130982335 | 8,379378367 | 8,222408523 |           |              |
| PCP035632 | 7,297649983 | 7,412188747 | 7,574934058 | 8,087462841 |           |              |
| PCP035642 | 7,743689989 | 7,815895594 | 7,975389442 | 7,77478706  | PCP035642 | XM_009367510 |
| PCP035644 | 8,201290788 | 8,178266468 | 8,222408523 | 8,74929961  | PCP035644 | XM_009353867 |
| PCP035686 | 8,672425342 | 8,682994584 | 8,664162806 | 8,619596417 | PCP035686 | XM_018649228 |
| PCP035687 | 7,464913269 | 7,448488033 | 7,300764373 | 7,176621973 |           |              |
| PCP035745 | 8,598685286 | 8,517000043 | 8,603626345 | 8,966736149 |           |              |
| PCP035780 | 7,375039431 | 6,942514505 | 7,273049587 | 6,339850003 |           |              |
| PCP035854 | 8,630558365 | 8,623259662 | 8,56350137  | 8,194756854 |           |              |
| PCP035860 | 8,141238626 | 8,257387843 | 8,184875343 | 8,118941073 | PCP035860 | XM_009378982 |
| PCP035861 | 7,961912672 | 7,884658968 | 8,258942852 | 8,695819867 | PCP035861 | XM_018652190 |
| PCP035866 | 7,667679281 | 7,44567705  | 7,470292816 | 7,975389442 | PCP035866 | XM_009374268 |
| PCP035875 | 7,118941073 | 7,544346278 | 7,415065677 | 7,423494135 | PCP035875 | XM_009375942 |
| PCP035922 | 7,21916852  | 7,451211112 | 7,202907418 | 6,902917719 |           |              |
| PCP035952 | 7,982993575 | 8,113742166 | 8,148069774 | 8,505136683 |           |              |
| PCP035955 | 8,251103639 | 8,184875343 | 7,619633096 | 7,730164413 | PCP035955 | XM_018647763 |
| PCP035984 | 7,360452072 | 7,451211112 | 7,518299077 | 7,916894583 | PCP035984 | XM_009366222 |
| PCP035994 | 8,230404783 | 8,695819867 | 8,539158811 | 8,623259662 | PCP035994 | XM_017327416 |
| PCP035995 | 6,695854658 | 6,64385619  | 6,794415866 | 7,718841075 | PCP035995 | XM_009379867 |
| PCP036017 | 7,17990909  | 7,369204723 | 7,768184325 | 8,118941073 | PCP036017 | XM_009339270 |
| PCP036035 | 7,796558821 | 7,965784285 | 8,215921225 | 8,438791853 |           |              |
| PCP036076 | 7,845490051 | 7,624466495 | 7,665335917 | 7,64385619  |           |              |
| PCP036087 | 7,380850638 | 7,336908182 | 7,520972191 | 8,098032083 |           |              |
| PCP036200 | 8,268331458 | 8,235200503 | 7,695785075 | 7,139551352 | PCP036200 | XM_009338194 |
| PCP036218 | 9,104153166 | 8,654636029 | 8,694636474 | 8,43325159  | PCP036218 | XM_009346201 |
| PCP036221 | 7,531381461 | 7,257387843 | 7,22881869  | 7,351645995 | PCP036221 | XM_009346095 |
| PCP036256 | 8,189824559 | 8,038918989 | 8,168270966 | 7,934693407 | PCP036256 | XM_009341485 |
| PCP036257 | 7,589988142 | 7,562242424 | 8,312882955 | 8,222408523 |           |              |
| PCP036268 | 6,837060204 | 6,672425342 | 6,95419631  | 7,569855608 | PCP036268 | XM_009356070 |
| PCP036343 | 7,499845887 | 7,577428828 | 7,779194046 | 8,630558365 | PCP036343 | XM_009337868 |
| PCP036359 | 7,648681141 | 8,031604721 | 7,98111057  | 8,445718428 | PCP036359 | XM_009379514 |
| PCP036374 | 7,033423002 | 6,918863237 | 6,930737338 | 6,759289016 | PCP036374 | XM_018644089 |
| PCP036457 | 7,994353437 | 7,641473777 | 7,876516947 | 7,619633096 | PCP036457 | XM_009373718 |
| PCP036485 | 8,744833837 | 8,44431092  | 8,553322101 | 8,677120596 | PCP036485 | XM_008391521 |



|           |             |             |             |             |           |              |
|-----------|-------------|-------------|-------------|-------------|-----------|--------------|
| PCP036500 | 8,076815597 | 8,458078458 | 8,136119594 | 7,670089681 | PCP036500 | XM_008371996 |
| PCP036502 | 7,965784285 | 7,423494135 | 7,342785837 | 7,014913158 | PCP036502 | XM_008390090 |
| PCP036513 | 7,058857621 | 7,159871337 | 7,263691734 | 7,963878669 |           |              |
| PCP036604 | 7,273049587 | 7,342785837 | 7,662988741 | 7,948367232 |           |              |
| PCP036605 | 8,020535537 | 8,046196362 | 7,820178962 | 7,798763389 |           |              |
| PCP036624 | 8,367764188 | 6,926829678 | 7,61227877  | 8,049848549 | PCP036624 | XM_009353898 |
| PCP036629 | 8,32791187  | 8,258942852 | 8,274587815 | 8,204571144 |           |              |
| PCP036634 | 8,038918989 | 8,299208018 | 8,311385042 | 9,136991112 | PCP036634 | XM_008339651 |
| PCP036670 | 7,222360218 | 7,244791942 | 7,176621973 | 6,709704193 |           |              |
| PCP036703 | 8,491853096 | 8,082149041 | 7,924812504 | 7,739240553 | PCP036703 | XM_009369475 |
| PCP036798 | 7,982993575 | 8,024197765 | 7,88062431  | 8,344295908 | PCP036798 | XM_009335917 |
| PCP036813 | 7,862141394 | 7,315874125 | 7,285402219 | 6,189824559 | PCP036813 | XM_008389727 |
| PCP036824 | 7,044394119 | 7,040782866 | 7,153095972 | 7,820178962 | PCP036824 | XM_008345143 |
| PCP036825 | 7,781359714 | 7,845490051 | 7,884658968 | 8,550746785 |           |              |
| PCP036851 | 6,609843592 | 6,667750232 | 6,890811455 | 7,518299077 |           |              |
| PCP036856 | 7,523561956 | 7,395148508 | 7,651051691 | 8,168270966 |           |              |
| PCP036879 | 7,820178962 | 8,014968933 | 7,98111057  | 8,385129006 |           |              |
| PCP036895 | 9,072347016 | 8,539158811 | 8,466260038 | 8,859006685 | PCP036895 | XM_009338205 |
| PCP036965 | 7,617136829 | 8,058911723 | 8,376472723 | 9,842868866 | PCP036965 | XM_009374306 |
| PCP036977 | 7,080337882 | 7,196430001 | 7,448488033 | 8,029728942 | PCP036977 | XM_009368915 |
| PCP037142 | 6,918863237 | 7,129283017 | 6,97349648  | 6,745909573 | PCP037142 | XR_525870    |
| PCP037164 | 7,815895594 | 8,022367813 | 8,382278171 | 8,67479253  | PCP037164 | XM_008344069 |
| PCP037243 | 7,105070402 | 6,777025123 | 6,794415866 | 6,824386003 | PCP037243 | XM_018646648 |
| PCP037254 | 7,051698368 | 7,189824559 | 7,247927513 | 7,639015048 | PCP037254 | XM_009341786 |
| PCP037353 | 7,920829209 | 7,882643049 | 7,772611496 | 8,202956379 |           |              |
| PCP037431 | 8,3994702   | 8,419243918 | 8,675957033 | 8,865207434 | PCP037431 | XM_009373768 |
| PCP037481 | 8,459431619 | 8,417852515 | 8,447083226 | 8,851749041 | PCP037481 | XM_009354223 |
| PCP037483 | 6,72342204  | 6,72342204  | 7,040782866 | 7,400879436 | PCP037483 | XM_009354215 |
| PCP037495 | 9,124121312 | 8,833933692 | 8,792237182 | 7,44567705  |           |              |
| PCP037514 | 7,437377568 | 7,483815777 | 7,634230226 | 7,984874125 | PCP037514 | XM_009352621 |
| PCP037521 | 8,73470962  | 8,586201784 | 8,659389441 | 8,564797319 | PCP037521 | XM_018649068 |
| PCP037525 | 8,227230852 | 8,458078458 | 8,513056419 | 9,092757141 |           |              |
| PCP037538 | 8,811631578 | 8,323415108 | 8,632995197 | 8,383704292 | PCP037538 | XM_009338445 |
| PCP037565 | 8,552015799 | 8,640244936 | 8,753785022 | 9,169925001 | PCP037565 | XM_009363787 |
| PCP037580 | 7,462134139 | 7,285402219 | 6,357552005 | 7,209453366 |           |              |
| PCP037599 | 6,528727582 | 7,142923928 | 6,235152624 | 8,125826717 |           |              |
| PCP037600 | 8,660602089 | 8,653454181 | 8,757123282 | 9,146365017 |           |              |
| PCP037604 | 8,001858526 | 8,265239967 | 8,515699838 | 8,630558365 | PCP037604 | XM_009378743 |
| PCP037626 | 8,224001674 | 8,125826717 | 8,04072808  | 8,459431619 | PCP037626 | XM_009372247 |
| PCP037794 | 6,922792504 | 6,965784285 | 7,241554209 | 7,536596918 | PCP037794 | XM_017327858 |
| PCP037800 | 7,686500527 | 7,653418353 | 7,890750668 | 8,396604781 | PCP037800 | XM_009359928 |
| PCP037806 | 7,437377568 | 7,363433935 | 7,732472726 | 8,003770871 | PCP037806 | XM_009377004 |
| PCP037869 | 7,324900589 | 7,257387843 | 7,497213158 | 7,920829209 | PCP037869 | XM_008382516 |
| PCP037972 | 8,176572111 | 7,894817763 | 8,268331458 | 7,882643049 | PCP037972 | XM_009364077 |
| PCP038033 | 7,375039431 | 7,497213158 | 7,77036657  | 8,013071384 | PCP038033 | XM_009357363 |
| PCP038035 | 8,064311643 | 8,103287808 | 8,173277373 | 7,977279923 |           |              |

|           |             |             |             |             |           |              |
|-----------|-------------|-------------|-------------|-------------|-----------|--------------|
| PCP038048 | 7,324900589 | 7,44567705  | 7,369204723 | 7,900866808 |           |              |
| PCP038049 | 8,567309664 | 8,409390936 | 8,658211483 | 9,152284842 |           |              |
| PCP038106 | 7,741466986 | 8,101555535 | 8,373604714 | 8,22881869  | PCP038106 | XM_009356934 |
| PCP038137 | 8,151422517 | 8,329437582 | 8,431831861 | 8,658211483 | PCP038137 | XM_008394169 |
| PCP038151 | 8,291539098 | 8,493174961 | 8,775873612 | 9,359024737 | PCP038151 | XM_009348342 |
| PCP038219 | 7,544346278 | 7,894817763 | 7,922851957 | 8,201290788 | PCP038219 | XM_009375075 |
| PCP038303 | 7,569855608 | 7,660566438 | 7,360452072 | 7,327956767 | PCP038303 | XM_009362491 |
| PCP038321 | 7,055282436 | 7,291585141 | 7,602364826 | 7,464913269 | PCP038321 | XM_018650520 |
| PCP038347 | 7,247927513 | 7,202907418 | 7,238404739 | 7,787902559 | PCP038347 | XM_009359606 |
| PCP038357 | 8,09976859  | 7,434628228 | 6,946379968 | 7,489205728 | PCP038357 | XM_009353070 |
| PCP038379 | 6,965784285 | 6,653490009 | 6,824386003 | 7,333870928 |           |              |
| PCP038384 | 7,541716163 | 6,266786541 | 7,101503009 | 8,118941073 | PCP038384 | XM_008240044 |
| PCP038385 | 7,183188734 | 7,609769734 | 7,279192684 | 7,50247382  | PCP038385 | XM_021946104 |
| PCP038410 | 6,247927513 | 6,737010678 | 6,882643049 | 7,641473777 | PCP038410 | XM_008390049 |
| PCP038435 | 7,451211112 | 7,369204723 | 7,269874722 | 7,105070402 |           |              |
| PCP038445 | 8,775873612 | 8,843387202 | 8,839203788 | 8,479780264 | PCP038445 | XM_008366781 |
| PCP038576 | 8,946409212 | 8,416459769 | 8,850718177 | 9,01402047  | PCP038576 | XM_009356975 |
| PCP038607 | 6,886672074 | 6,705010253 | 6,988684687 | 7,587440004 |           |              |
| PCP038625 | 7,805227956 | 7,736943052 | 7,813781191 | 8,357552005 | PCP038625 | XM_009344565 |
| PCP038637 | 7,624466495 | 7,950293432 | 8,329437582 | 8,359002767 | PCP038637 | XM_008366667 |
| PCP038643 | 7,459431619 | 7,464913269 | 7,464913269 | 8,752648252 |           |              |
| PCP038654 | 7,577428828 | 7,269874722 | 7,646234675 | 7,990557838 |           |              |
| PCP038671 | 8,577428828 | 7,54689446  | 7,478405614 | 7,617136829 |           |              |
| PCP038700 | 7,475733431 | 6,886672074 | 7,315874125 | 7,206232954 | PCP038700 | XR_001786501 |
| PCP038874 | 8,528766645 | 8,535275377 | 8,667714757 | 9,084808388 | PCP038874 | XM_009341265 |
| PCP038902 | 7,589988142 | 7,567347696 | 7,667679281 | 8,108524457 | PCP038902 | XM_009342784 |
| PCP038912 | 7,3458044   | 7,754887502 | 7,497213158 | 7,483815777 | PCP038912 | XM_009353483 |
| PCP038916 | 8,060695932 | 8,101555535 | 8,164906927 | 8,813781191 |           |              |
| PCP038917 | 7,660566438 | 7,792269724 | 7,826548487 | 8,370687407 |           |              |
| PCP038925 | 7,269874722 | 7,108524457 | 7,617136829 | 8,013071384 | PCP038925 | XR_001954399 |
| PCP038951 | 8,680640826 | 8,489165579 | 8,535275377 | 8,536558066 | PCP038951 | XM_009374231 |
| PCP038995 | 7,986809101 | 7,994353437 | 8,447083226 | 8,805195705 | PCP038995 | XM_009367558 |
| PCP038998 | 8,161535025 | 8,198052084 | 8,459431619 | 8,212715235 | PCP038998 | XM_009348512 |
| PCP039021 | 7,794415866 | 7,686500527 | 7,700439718 | 7,639015048 | PCP039021 | XM_009370465 |
| PCP039027 | 7,946438456 | 8,127581695 | 7,914863459 | 7,602364826 | PCP039027 | XM_009370185 |
| PCP039032 | 8,505136683 | 8,625708843 | 8,594959026 | 9,08127038  | PCP039032 | XM_009341358 |
| PCP039035 | 6,513016928 | 6,737010678 | 8,464872438 | 7,807354922 | PCP039035 | NM_001319261 |
| PCP039058 | 7,263691734 | 7,423494135 | 7,617136829 | 8,124121312 |           |              |
| PCP039062 | 8,038918989 | 7,826548487 | 8,317412614 | 8,761551232 | PCP039062 | XM_009347602 |
| PCP039087 | 7,244791942 | 6,926829678 | 6,950351762 | 6,902917719 |           |              |
| PCP039100 | 8,460783512 | 8,168270966 | 8,339850003 | 8,146339557 | PCP039100 | XM_009355812 |
| PCP039124 | 7,721099189 | 7,448488033 | 7,389480771 | 7,21916852  | PCP039124 | XM_008366547 |
| PCP039130 | 7,014913158 | 6,965784285 | 6,790120385 | 7,375039431 | PCP039130 | XM_018649514 |
| PCP039167 | 7,348728154 | 7,473056289 | 7,398059585 | 7,260496187 |           |              |
| PCP039192 | 7,805227956 | 8,470333494 | 8,220765252 | 8,505136683 |           |              |
| PCP039240 | 8,144658243 | 8,078577814 | 8,305286574 | 8,009380767 | PCP039240 | XM_009364837 |

|           |             |             |             |             |           |              |
|-----------|-------------|-------------|-------------|-------------|-----------|--------------|
| PCP039279 | 7,215969746 | 7,011227255 | 7,146390476 | 7,604886762 |           |              |
| PCP039292 | 8,321928095 | 8,419243918 | 8,61717357  | 8,911901261 | PCP039292 | XR_001953444 |
| PCP039378 | 8,057071136 | 8,014968933 | 8,511752654 | 8,478446064 |           |              |
| PCP039452 | 7,122362117 | 7,142923928 | 7,363433935 | 7,783522135 |           |              |
| PCP039457 | 6,677085351 | 7,189824559 | 7,011227255 | 7,090959258 | PCP039457 | XM_018642983 |
| PCP039468 | 7,536596918 | 7,843418611 | 7,691185174 | 7,648681141 | PCP039468 | XM_009380354 |
| PCP039497 | 8,082149041 | 8,426264755 | 8,42488011  | 8,724513853 | PCP039497 | XM_017337017 |
| PCP039515 | 8,163247124 | 8,255831156 | 8,21106088  | 8,049848549 | PCP039515 | XM_009356631 |
| PCP039528 | 7,707359132 | 7,582480735 | 7,813781191 | 8,199672345 |           |              |
| PCP039534 | 6,609843592 | 6,768184325 | 6,72342204  | 7,327956767 | PCP039534 | XM_009335823 |
| PCP039547 | 7,451211112 | 7,582480735 | 7,64385619  | 8,009380767 |           |              |
| PCP039574 | 8,309840108 | 8,21106088  | 8,345760055 | 8,705044823 | PCP039574 | XM_017335225 |
| PCP039581 | 5,513174885 | 7,122362117 | 7,74819285  | 7,564759219 | PCP039581 | XM_009363631 |
| PCP039584 | 8,009380767 | 8,434628228 | 8,555854491 | 8,682994584 | PCP039584 | XM_008377264 |
| PCP039590 | 7,122362117 | 6,922792504 | 7,215969746 | 7,559721231 |           |              |
| PCP039594 | 7,977279923 | 7,973439079 | 7,847558521 | 8,645045922 |           |              |
| PCP039595 | 8,514398461 | 8,42488011  | 8,725638921 | 8,973467779 |           |              |
| PCP039610 | 8,202956379 | 8,169925001 | 7,822284016 | 7,662988741 | PCP039610 | XM_009362146 |
| PCP039614 | 8,390899794 | 8,687655621 | 8,528766645 | 8,668884984 | PCP039614 | XM_009353034 |
| PCP039650 | 6,894817763 | 7,403693786 | 7,736943052 | 8,24474438  |           |              |
| PCP039687 | 8,856954575 | 8,594959026 | 8,661778098 | 9,054387253 | PCP039687 | XM_008347484 |
| PCP039790 | 8,184875343 | 8,194756854 | 8,698114274 | 8,470333494 | PCP039790 | XM_017332151 |
| PCP039795 | 8,232037117 | 7,967687386 | 7,860031646 | 7,750405521 | PCP039795 | XM_009346750 |
| PCP039814 | 7,196430001 | 7,007531912 | 7,768184325 | 7,453929061 |           |              |
| PCP039987 | 7,451211112 | 7,101503009 | 7,42063398  | 6,624539604 | PCP039987 | XM_018643145 |
| PCP040042 | 8,579956993 | 8,302273349 | 8,163247124 | 8,055282436 | PCP040042 | XM_008358734 |
| PCP040047 | 7,648681141 | 7,83080039  | 7,662988741 | 7,688809791 | PCP040047 | XM_009372722 |
| PCP040109 | 7,276124405 | 7,132679654 | 7,459431619 | 7,736943052 |           |              |
| PCP040131 | 7,686500527 | 7,920829209 | 7,709635275 | 7,153095972 | PCP040131 | XM_008374694 |
| PCP040157 | 8,06786455  | 8,235200503 | 7,826548487 | 7,196430001 | PCP040157 | XM_009361802 |
| PCP040158 | 8,269921462 | 8,412231097 | 8,578674597 | 8,761551232 | PCP040158 | XM_009361800 |
| PCP040178 | 6,763809907 | 6,981053471 | 7,50517639  | 8,113742166 | PCP040178 | XM_009370099 |
| PCP040191 | 7,156538193 | 7,282347131 | 7,478405614 | 7,798763389 | PCP040191 | XM_009348358 |
| PCP040225 | 7,462134139 | 7,634230226 | 7,360452072 | 6,894817763 | PCP040225 | XM_018648639 |
| PCP040264 | 7,44567705  | 6,714245518 | 7,018700931 | 7,115511897 | PCP040264 | XM_008234567 |
| PCP040283 | 7,781359714 | 7,725673    | 7,984874125 | 8,596189756 | PCP040283 | XM_009364016 |
| PCP040381 | 7,196430001 | 7,132679654 | 6,68187088  | 6,559644763 | PCP040381 | XM_009342554 |
| PCP040406 | 7,183188734 | 7,285402219 | 7,448488033 | 7,822284016 | PCP040406 | XM_008341616 |
| PCP040423 | 7,351645995 | 7,609769734 | 7,321928095 | 7,348728154 |           |              |
| PCP040455 | 8,483815777 | 8,356099782 | 8,447083226 | 8,835008208 | PCP040455 | XM_009339859 |
| PCP040467 | 8,073231127 | 7,942514505 | 7,890750668 | 7,832890014 |           |              |
| PCP040479 | 7,845490051 | 8,073231127 | 8,300718622 | 8,522267655 | PCP040479 | XM_009359277 |
| PCP040490 | 8,434628228 | 8,437419184 | 8,522267655 | 8,986780664 |           |              |
| PCP040532 | 5,448570626 | 6,64385619  | 7,515699838 | 8,283875484 | PCP040532 | XM_009358905 |
| PCP040533 | 8,390899794 | 8,273002948 | 8,345760055 | 7,996219247 | PCP040533 | XM_009381229 |
| PCP040549 | 8,283875484 | 8,318904285 | 8,379378367 | 8,764871591 |           |              |

|           |             |             |             |             |           |              |
|-----------|-------------|-------------|-------------|-------------|-----------|--------------|
| PCP040636 | 8,76927586  | 8,655816908 | 8,606109055 | 7,918863237 | PCP040636 | XM_009379206 |
| PCP040702 | 8,541754876 | 8,199672345 | 8,463524373 | 8,588714636 |           |              |
| PCP040722 | 8,21106088  | 8,320439548 | 8,493174961 | 8,770399609 |           |              |
| PCP040723 | 8,271463028 | 8,188193194 | 8,514398461 | 9,236014192 |           |              |
| PCP040735 | 7,956114749 | 8,230404783 | 8,285402219 | 8,708497652 |           |              |
| PCP040749 | 7,453929061 | 7,327956767 | 7,705079392 | 7,866228001 | PCP040749 | XM_018645941 |
| PCP040752 | 7,73470962  | 7,878541438 | 7,916894583 | 8,348728154 |           |              |
| PCP040754 | 8,110248388 | 8,220765252 | 8,426264755 | 8,70276142  | PCP040754 | XM_018650835 |
| PCP040782 | 7,247927513 | 7,383704292 | 7,415065677 | 7,83080039  |           |              |
| PCP040800 | 7,798763389 | 8,022367813 | 8,073231127 | 7,882643049 | PCP040800 | XM_009361953 |
| PCP040808 | 6,369291982 | 6,741466986 | 6,845490051 | 7,440204752 | PCP040808 | XM_009353217 |
| PCP040837 | 8,282300792 | 8,309840108 | 8,288496992 | 8,062477937 | PCP040837 | XR_001954450 |
| PCP040852 | 8,283875484 | 8,317412614 | 8,199672345 | 8,24474438  | PCP040852 | XM_009357134 |
| PCP040854 | 8,660602089 | 8,462175047 | 8,568602197 | 7,963878669 | PCP040854 | XM_009357143 |
| PCP040857 | 7,330916878 | 7,273049587 | 7,176621973 | 7,847558521 |           |              |
| PCP040864 | 7,523561956 | 7,291585141 | 7,589988142 | 7,215969746 | PCP040864 | XM_018649171 |
| PCP041086 | 8,260543232 | 8,075051225 | 8,45532722  | 8,640244936 |           |              |
| PCP041092 | 6,279285561 | 6,619559738 | 7,139551352 | 7,400879436 |           |              |
| PCP041095 | 7,660566438 | 7,843418611 | 7,709635275 | 8,269921462 |           |              |
| PCP041108 | 7,06608919  | 7,136170875 | 7,423494135 | 7,730164413 |           |              |
| PCP041110 | 8,497173232 | 8,524855097 | 8,491853096 | 8,373604714 | PCP041110 | XM_018650861 |
| PCP041133 | 7,741466986 | 7,536596918 | 7,665335917 | 7,28845085  | PCP041133 | XM_009351209 |
| PCP041178 | 8,148069774 | 8,222408523 | 8,323415108 | 8,83709175  |           |              |
| PCP041190 | 8,212715235 | 8,533991546 | 8,481113232 | 8,487840034 | PCP041190 | XM_017324838 |
| PCP041225 | 8,335390355 | 8,057071136 | 7,958088658 | 7,395148508 | PCP041225 | XM_017324555 |
| PCP041351 | 7,672425342 | 7,754887502 | 7,90285744  | 8,479780264 |           |              |
| PCP041363 | 7,862141394 | 7,928784831 | 8,173277373 | 8,75598914  |           |              |
| PCP041367 | 7,080337882 | 7,111970261 | 7,033423002 | 6,297741678 | PCP041367 | XM_009356246 |
| PCP041398 | 8,260543232 | 8,06786455  | 7,963878669 | 7,63175911  |           |              |
| PCP041414 | 7,415065677 | 7,592457037 | 7,674757228 | 8,345760055 |           |              |
| PCP041420 | 7,389480771 | 7,584962501 | 7,732472726 | 8           |           |              |
| PCP041448 | 8,607330314 | 8,618385502 | 8,891783703 | 9,077696975 |           |              |
| PCP041466 | 7,604886762 | 7,260496187 | 7,336908182 | 7,090959258 | PCP041466 | XM_009361580 |
| PCP041476 | 8,452570726 | 7,798763389 | 7,222360218 | 5,922911406 | PCP041476 | XM_009361011 |
| PCP041552 | 8,568602197 | 8,763776717 | 8,639051236 | 8,482485305 |           |              |
| PCP041593 | 7,754887502 | 7,837123296 | 7,886733033 | 8,58747751  |           |              |
| PCP041594 | 7,87036472  | 7,677155841 | 7,934693407 | 8,478446064 |           |              |
| PCP041601 | 8,305286574 | 8,124121312 | 7,984874125 | 8,196380818 | PCP041601 | XM_018647922 |
| PCP041602 | 7,752681699 | 7,604886762 | 8,130982335 | 7,752681699 | PCP041602 | XM_009360150 |
| PCP041627 | 8,158205728 | 7,928784831 | 7,934693407 | 7,832890014 | PCP041627 | XM_009346364 |
| PCP041653 | 8,740354199 | 8,513056419 | 8,312882955 | 8,357552005 | PCP041653 | XM_018642464 |
| PCP041668 | 8,338379842 | 8,518338423 | 8,376472723 | 8,767091963 | PCP041668 | XM_018652182 |
| PCP041682 | 7,83080039  | 7,942514505 | 8,020535537 | 8,369248353 |           |              |
| PCP041704 | 8,305286574 | 8,225593068 | 8,181549844 | 8,615923847 | PCP041704 | XM_009337029 |
| PCP041716 | 6,737010678 | 7,108524457 | 7,173227395 | 7,648681141 | PCP041716 | XM_009344681 |
| PCP041722 | 8,105018005 | 8,176572111 | 8,430452552 | 8,263644792 | PCP041722 | XM_017325659 |

|           |             |             |             |             |           |              |
|-----------|-------------|-------------|-------------|-------------|-----------|--------------|
| PCP041732 | 7,383704292 | 7,730164413 | 7,860031646 | 8,005624549 | PCP041732 | XM_008385106 |
| PCP041810 | 7,166615031 | 7,291585141 | 7,520972191 | 7,21916852  |           |              |
| PCP041884 | 7,900866808 | 7,470292816 | 7,526147081 | 7,818070833 | PCP041884 | XM_009359617 |
| PCP041895 | 7,592457037 | 7,375039431 | 7,300764373 | 6,768184325 | PCP041895 | XM_009353226 |
| PCP041928 | 7,327956767 | 6,906890596 | 6,938638658 | 7,572359168 |           |              |
| PCP041960 | 7,475733431 | 7,660566438 | 7,930737338 | 8,125826717 | PCP041960 | XM_009376926 |
| PCP041961 | 8,813781191 | 9,082149041 | 8,83709175  | 8,416459769 | PCP041961 | XM_009376928 |
| PCP041983 | 7,900866808 | 7,855927425 | 8,089212109 | 8,903881846 | PCP041983 | XM_009378436 |
| PCP042034 | 8,611024797 | 8,460783512 | 8,593689902 | 8,320439548 |           |              |
| PCP042070 | 8,016808288 | 8,094500005 | 7,851749041 | 8,13442632  | PCP042070 | XM_009370055 |
| PCP042071 | 7,971543554 | 8,125826717 | 8,189824559 | 8,464872438 |           |              |
| PCP042073 | 8,583722152 | 8,526186214 | 8,568602197 | 9,066977144 | PCP042073 | XM_008390597 |
| PCP042074 | 8,154818109 | 8,48651327  | 8,955155849 | 8,453970202 |           |              |
| PCP042088 | 7,641473777 | 7,864186145 | 7,6794801   | 8,438791853 |           |              |
| PCP042094 | 8,553322101 | 8,84024291  | 8,412231097 | 8,532667615 | PCP042094 | XM_009380591 |
| PCP042103 | 8,08390476  | 8,204571144 | 8,251103639 | 8,581200582 | PCP042103 | XM_009339805 |
| PCP042213 | 7,303780748 | 7,14974712  | 7,17990909  | 7,944448531 | PCP042213 | XM_009336946 |
| PCP042217 | 9,896332404 | 4,564987801 | 10,45258102 | 10,03754695 | PCP042217 | XM_009337215 |
| PCP042258 | 8,510447709 | 8,58747751  | 8,845490051 | 9,343563277 | PCP042258 | XM_009367932 |
| PCP042261 | 8,481113232 | 8,214319121 | 8,269921462 | 8,385129006 | PCP042261 | XM_018649610 |
| PCP042277 | 7,118941073 | 7,567347696 | 7,90285744  | 8,204571144 | PCP042277 | XM_009351526 |
| PCP042310 | 6,564835417 | 7,136170875 | 7,294620749 | 8,232037117 |           |              |
| PCP042314 | 7,247927513 | 7,456724026 | 7,330916878 | 7,956114749 | PCP042314 | XM_009342089 |
| PCP042328 | 7,033423002 | 7,08395793  | 7,626950122 | 7,745976779 | PCP042328 | XM_009380796 |
| PCP042349 | 6,878602742 | 6,845490051 | 7,06608919  | 7,599912842 | PCP042349 | XR_525318    |
| PCP042351 | 7,936637939 | 8,164906927 | 8,277659361 | 8,447083226 | PCP042351 | XM_018643660 |
| PCP042358 | 6,686500527 | 6,99242856  | 7,06608919  | 7,429030064 | PCP042358 | XM_009361986 |
| PCP042396 | 7,73470962  | 7,752681699 | 7,803033252 | 7,462134139 |           |              |
| PCP042521 | 7,285402219 | 7,400879436 | 7,475733431 | 7,839203788 | PCP042521 | XM_009367260 |
| PCP042569 | 7,241554209 | 7,354646096 | 7,567347696 | 8,146339557 | PCP042569 | XM_008395281 |
| PCP042579 | 7,73470962  | 7,787902559 | 7,988684687 | 7,662988741 | PCP042579 | XM_009343460 |
| PCP042588 | 7,14974712  | 6,882643049 | 6,86628983  | 6,60481265  |           |              |
| PCP042593 | 7,707359132 | 8,130982335 | 8,594959026 | 8,087462841 | PCP042593 | XM_008354721 |
| PCP042610 | 8,189824559 | 7,866228001 | 8,014968933 | 8,471675214 | PCP042610 | XM_009354535 |
| PCP042692 | 6,718772592 | 6,857980995 | 6,99242856  | 7,354646096 | PCP042692 | XM_018651811 |
| PCP042760 | 7,318949464 | 7,037052702 | 7,153095972 | 6,820178962 |           |              |
| PCP042784 | 8,181549844 | 8,348728154 | 8,318904285 | 8,744833837 | PCP042784 | XM_009374997 |
| PCP042785 | 7,193081765 | 7,360452072 | 7,333870928 | 7,792269724 | PCP042785 | XM_008390263 |
| PCP042790 | 8,736976865 | 8,64385619  | 8,584962501 | 8,984902599 | PCP042790 | XM_009375007 |
| PCP042804 | 8,005624549 | 7,841281284 | 7,839203788 | 7,886733033 | PCP042804 | XM_009354742 |
| PCP042809 | 6,772545519 | 6,902917719 | 7,146390476 | 7,779194046 | PCP042809 | XM_009354755 |
| PCP042825 | 8,673591756 | 8,460783512 | 8,564797319 | 8,367764188 |           |              |
| PCP042839 | 6,798698597 | 7,029784146 | 7,254272787 | 7,541716163 | PCP042839 | XM_018648549 |
| PCP042842 | 8,19313106  | 7,609769734 | 6,658211483 | 6,80309785  | PCP042842 | XM_009363246 |
| PCP042861 | 8,520932916 | 8,696967526 | 8,792237182 | 9           | PCP042861 | XM_009360772 |
| PCP042866 | 6,874428132 | 7,076815597 | 7,330916878 | 7,718841075 | PCP042866 | XM_009340417 |

|           |             |             |             |             |           |              |
|-----------|-------------|-------------|-------------|-------------|-----------|--------------|
| PCP042881 | 8,452570726 | 8,74819285  | 8,77478706  | 8,597419437 | PCP042881 | XM_009362261 |
| PCP042887 | 6,807354922 | 6,768184325 | 6,853870927 | 7,412188747 | PCP042887 | XM_018642533 |
| PCP042928 | 8,122413888 | 8,536558066 | 8,988684687 | 8,951284715 |           |              |
| PCP042957 | 6,709704193 | 6,662917555 | 6,857980995 | 7,389480771 | PCP042957 | XM_018645208 |
| PCP042990 | 7,686500527 | 7,718841075 | 8,112022407 | 8,315919398 |           |              |
| PCP043012 | 7,327956767 | 7,403693786 | 7,820178962 | 8,296136161 |           |              |
| PCP043067 | 6,47037417  | 6,579994693 | 6,667750232 | 8,577428828 | PCP043067 | XM_008378443 |
| PCP043082 | 8,342830273 | 8,468949809 | 8,513056419 | 8,423452115 | PCP043082 | XM_009381247 |
| PCP043086 | 7,900866808 | 8,166564822 | 8,125826717 | 8,046196362 | PCP043086 | XM_009381250 |
| PCP043119 | 8,317412614 | 8,335390355 | 8,453970202 | 8,30833903  | PCP043119 | XM_009336650 |
| PCP043122 | 8,202956379 | 8,144658243 | 8,082149041 | 8,051643995 |           |              |
| PCP043194 | 7,912889336 | 8,003770871 | 8,148069774 | 8,50779464  | PCP043194 | XM_009368742 |
| PCP043197 | 6,815959618 | 7,111970261 | 7,238404739 | 7,499845887 | PCP043197 | XM_009370315 |
| PCP043208 | 8,17990909  | 8,350187812 | 8,62450305  | 9,137836494 |           |              |
| PCP043233 | 7,473056289 | 7,594921715 | 7,541716163 | 7,398059585 | PCP043233 | XM_009360740 |
| PCP043235 | 8,398016818 | 8,020535537 | 8,163247124 | 7,988684687 | PCP043235 | XR_001953390 |
| PCP043237 | 6,878602742 | 7,300764373 | 7,209453366 | 7,928784831 |           |              |
| PCP043247 | 8,204571144 | 8,422064766 | 8,727920455 | 8,360495967 | PCP043247 | XM_009363762 |
| PCP043248 | 7,845490051 | 7,83080039  | 8,342830273 | 7,942514505 | PCP043248 | XM_008377166 |
| PCP043376 | 8,78571401  | 8,494535617 | 8,637820329 | 8,678318438 | PCP043376 | XM_009337072 |
| PCP043393 | 7,73470962  | 7,494495616 | 7,691185174 | 8,202956379 | PCP043393 | XM_008368680 |
| PCP043435 | 8,057071136 | 8,168270966 | 8,390899794 | 8,851749041 | PCP043435 | XM_009336960 |
| PCP043444 | 8           | 8,060695932 | 8,161535025 | 8,54689446  | PCP043444 | XM_009372668 |
| PCP043464 | 7,851749041 | 8,33391564  | 8,631795481 | 9,214319121 | PCP043464 | XM_018644887 |
| PCP043487 | 8,416459769 | 7,684187561 | 7,868328714 | 7,92677039  | PCP043487 | XM_009356557 |
| PCP043511 | 7,069637728 | 6,942514505 | 7,309885571 | 7,684187561 | PCP043511 | XM_009351738 |
| PCP043535 | 8,209453366 | 7,849686575 | 8,283875484 | 8,523561956 |           |              |
| PCP043651 | 9,003742767 | 8,576181982 | 8,694636474 | 8,602401945 | PCP043651 | XM_009346286 |
| PCP043692 | 8,612241904 | 8,854868383 | 8,698114274 | 8,41079052  | PCP043692 | XM_008391583 |
| PCP043742 | 6,981053471 | 6,777025123 | 7,235248379 | 7,604886762 |           |              |
| PCP043760 | 8,589950702 | 8,696967526 | 8,865207434 | 9,054387253 | PCP043760 | XM_009342303 |
| PCP043799 | 7,920829209 | 7,888743249 | 8,033423002 | 8,562242424 | PCP043799 | XM_008364744 |
| PCP043803 | 7,183188734 | 7,115511897 | 7,330916878 | 7,798763389 | PCP043803 | XM_008356208 |
| PCP043827 | 8,212715235 | 8,247927513 | 8,459431619 | 8,726797165 |           |              |
| PCP043929 | 7,251056285 | 7,440204752 | 7,958088658 | 8,920858975 | PCP043929 | XM_009346160 |
| PCP043944 | 8,385129006 | 8,318904285 | 8,32494558  | 8,22881869  | PCP043944 | XM_009358067 |
| PCP043998 | 8,382278171 | 8,339850003 | 8,376472723 | 8,279239123 | PCP043998 | XM_009346037 |
| PCP044010 | 8,291539098 | 8,489165579 | 8,678318438 | 8,937609223 | PCP044010 | XM_009341279 |
| PCP044014 | 7,732472726 | 7,674757228 | 7,952275317 | 8,372125027 | PCP044014 | XM_017324398 |
| PCP044016 | 8,73470962  | 8,689997971 | 8,794415866 | 8,395191361 |           |              |
| PCP044032 | 6,420718183 | 6,768184325 | 6,828707735 | 7,834976616 |           |              |
| PCP044074 | 8,022367813 | 8,103287808 | 7,946438456 | 7,741466986 | PCP044074 | XM_018650796 |
| PCP044082 | 7,936637939 | 7,956114749 | 7,874489611 | 7,741466986 |           |              |
| PCP044097 | 7,108524457 | 7,231989133 | 7,254272787 | 7,026025399 | PCP044097 | XM_009376826 |
| PCP044101 | 7,312882955 | 7,324900589 | 7,626950122 | 8,159871337 | PCP044101 | XM_017336642 |
| PCP044104 | 7,209453366 | 7,533952624 | 7,617136829 | 7,888743249 | PCP044104 | XM_008355678 |

|           |             |             |             |             |           |              |
|-----------|-------------|-------------|-------------|-------------|-----------|--------------|
| PCP044108 | 7,087462841 | 7,146390476 | 7,470292816 | 7,843418611 |           |              |
| PCP044125 | 7,969645536 | 8,064311643 | 8,198052084 | 8,545620932 | PCP044125 | XM_008384161 |
| PCP044126 | 8,062477937 | 7,569855608 | 7,577428828 | 7,315874125 | PCP044126 | XR_667722    |
| PCP044164 | 8,449850215 | 8,670054263 | 8,809510912 | 9,327170869 | PCP044164 | XM_009335751 |
| PCP044166 | 8,318904285 | 8,468949809 | 8,670054263 | 9,193944186 | PCP044166 | XR_527174    |
| PCP044170 | 7,225641265 | 7,787902559 | 7,727920455 | 7,944448531 |           |              |
| PCP044174 | 6,363346321 | 7,022367813 | 7,64385619  | 7,312882955 | PCP044174 | XM_009359741 |
| PCP044181 | 7,231989133 | 7,884658968 | 7,584962501 | 7,705079392 | PCP044181 | XM_004290967 |
| PCP044190 | 7,691185174 | 7,266786541 | 7,730164413 | 7,409390936 | PCP044190 | XM_018647470 |
| PCP044191 | 7,569855608 | 7,757089938 | 7,813781191 | 8,326429487 | PCP044191 | XM_009358160 |
| PCP044194 | 8,009380767 | 8,082149041 | 8,379378367 | 8,48651327  | PCP044194 | XM_009381252 |
| PCP044202 | 8,28077077  | 8,431831861 | 8,519636253 | 9,319672121 |           |              |
| PCP044209 | 8,320439548 | 8,32494558  | 8,388017285 | 8,214319121 | PCP044209 | XM_009359504 |
| PCP044211 | 6,50779464  | 6,906890596 | 6,768184325 | 7,494495616 |           |              |
| PCP044233 | 7,837123296 | 8           | 7,562242424 | 7,811663685 |           |              |
| PCP044243 | 8,30833903  | 8,370687407 | 8,326429487 | 8,268331458 |           |              |
| PCP044244 | 7,88062431  | 8,031604721 | 8,42488011  | 8,828676005 | PCP044244 | XM_008376437 |
| PCP044247 | 7,641473777 | 7,655852677 | 7,727920455 | 7,153095972 | PCP044247 | XM_009375680 |
| PCP044251 | 6,832890014 | 6,946379968 | 6,996275749 | 6,691115365 |           |              |
| PCP044257 | 7,417852515 | 7,54689446  | 7,604886762 | 8,178266468 | PCP044257 | XM_017327410 |
| PCP044258 | 7,866228001 | 8,300718622 | 7,958088658 | 8,255831156 | PCP044258 | XM_009364791 |
| PCP044259 | 8,321928095 | 8,613494819 | 8,618385502 | 8,474395481 | PCP044259 | XM_009346513 |
| PCP044267 | 7,912889336 | 8,129283017 | 8,241601875 | 8,550746785 | PCP044267 | XM_009343248 |
| PCP044285 | 7,725673    | 7,462134139 | 7,890750668 | 8,091012169 | PCP044285 | XM_018644750 |
| PCP044287 | 7,700439718 | 7,327956767 | 7,8008999   | 7,906890596 | PCP044287 | XM_009376949 |
| PCP044302 | 8,164906927 | 8,255831156 | 8,227230852 | 8,639051236 | PCP044302 | XM_008353698 |
| PCP044312 | 7,785746699 | 7,811663685 | 7,813781191 | 8,342830273 |           |              |
| PCP044321 | 8,558420713 | 8,562242424 | 8,645045922 | 8,148069774 |           |              |
| PCP044324 | 7,456724026 | 7,660566438 | 7,572359168 | 8,04072808  |           |              |
| PCP044337 | 8,24474438  | 8,294620749 | 8,118941073 | 7,8008999   |           |              |
| PCP044339 | 7,674757228 | 7,572359168 | 7,826548487 | 8,271463028 |           |              |
| PCP044346 | 8,164906927 | 8,299208018 | 8,453970202 | 8,74708524  | PCP044346 | XM_009348564 |
| PCP044381 | 8,74708524  | 8,631795481 | 8,718806834 | 9,164077264 | PCP044381 | XM_008367459 |
| PCP044419 | 8,330916878 | 8,255831156 | 8,416459769 | 8,21757002  | PCP044419 | XM_009362896 |
| PCP044421 | 7,557119022 | 7,958088658 | 7,958088658 | 8,042589623 | PCP044421 | XM_009360882 |
| PCP044435 | 8,076815597 | 7,693486957 | 8,058911723 | 7,942514505 |           |              |
| PCP044443 | 7,423494135 | 7,914863459 | 7,910912508 | 8,483815777 | PCP044443 | XM_009359381 |
| PCP044445 | 8,613494819 | 8,447083226 | 8,540438054 | 8,361943774 | PCP044445 | XM_009359402 |
| PCP044450 | 8,370687407 | 8,265239967 | 8,535275377 | 8,314379315 | PCP044450 | XM_009349315 |
| PCP044467 | 8,246360579 | 7,794415866 | 8,43325159  | 9,164906927 | PCP044467 | XM_008348493 |
| PCP044483 | 7,300764373 | 6,594996337 | 6,886672074 | 6,841344192 | PCP044483 | XM_009356970 |
| PCP044500 | 7,670089681 | 7,92677039  | 8,042589623 | 8,412231097 | PCP044500 | XM_009380416 |
| PCP044504 | 7,040782866 | 7,351645995 | 7,285402219 | 7,721099189 |           |              |
| PCP044509 | 7,206232954 | 7,50247382  | 7,539158811 | 7,92677039  | PCP044509 | XM_009376680 |
| PCP044516 | 7           | 7,186559982 | 7,176621973 | 7,718841075 | PCP044516 | XM_009371943 |
| PCP044524 | 6,785681319 | 7,003714662 | 8,353146825 | 9,545601627 | PCP044524 | XM_009346628 |

|           |             |             |             |             |           |              |
|-----------|-------------|-------------|-------------|-------------|-----------|--------------|
| PCP044541 | 8,321928095 | 8,118941073 | 8,533991546 | 8,74708524  | PCP044541 | XM_009343682 |
| PCP044542 | 7,199672345 | 6,890811455 | 7,108524457 | 6,996275749 |           |              |
| PCP044544 | 6,475733431 | 6,853870927 | 7,139551352 | 7,639015048 |           |              |
| PCP044556 | 7,037052702 | 6,459431619 | 7,22881869  | 7,564759219 | PCP044556 | XM_008388478 |
| PCP044558 | 6,714245518 | 7,497213158 | 7,231989133 | 7,339850003 | PCP044558 | XM_009345461 |
| PCP044572 | 7,42063398  | 7,266786541 | 7,464913269 | 7,904905525 | PCP044572 | XM_009369409 |
| PCP044574 | 8,951284715 | 8,934663924 | 8,897845456 | 8,395191361 | PCP044574 | XM_018642524 |
| PCP044587 | 7,434628228 | 7,475733431 | 7,914863459 | 8,260543232 | PCP044587 | XM_009370515 |
| PCP044595 | 7,448488033 | 7,569855608 | 7,342785837 | 7,330916878 | PCP044595 | XM_008364727 |
| PCP044616 | 8,314379315 | 7,984874125 | 8,136119594 | 8,677120596 | PCP044616 | XM_009348866 |
| PCP044637 | 8,001858526 | 8,419243918 | 8,659389441 | 8,724513853 | PCP044637 | XM_009336142 |
| PCP044701 | 8,451211112 | 8,510447709 | 8,609806663 | 9,182394353 | PCP044701 | XM_008378652 |
| PCP044704 | 8,481113232 | 8,431831861 | 8,470333494 | 8,353146825 | PCP044704 | XM_004309761 |
| PCP044735 | 8,372125027 | 7,960001932 | 8,014968933 | 7,750405521 | PCP044735 | XM_017333919 |
| PCP044738 | 7,047996356 | 7,339850003 | 7,453929061 | 7,711976642 | PCP044738 | XM_009337521 |
| PCP044743 | 7,209453366 | 7,080337882 | 7,348728154 | 7,736943052 |           |              |
| PCP044768 | 7,478405614 | 7,577428828 | 7,851749041 | 8,153146652 | PCP044768 | XM_009377950 |
| PCP044769 | 7,044394119 | 7,50247382  | 7,369204723 | 7,209453366 |           |              |
| PCP044813 | 7,456724026 | 7,30679083  | 7,549438149 | 7,868328714 | PCP044813 | XM_009361301 |
| PCP044818 | 7,132679654 | 7,377904593 | 7,811663685 | 8,148069774 |           |              |
| PCP044856 | 7,660566438 | 8,018645301 | 8,049848549 | 7,88062431  | PCP044856 | XM_008395262 |
| PCP044870 | 7,14974712  | 7,069637728 | 7,238404739 | 6,938638658 | PCP044870 | XR_001952024 |
| PCP044873 | 7,811663685 | 7,761551232 | 7,768184325 | 8,279239123 |           |              |
| PCP044892 | 7,754887502 | 7,212666605 | 7,360452072 | 7,95419631  | PCP044892 | XM_009361144 |
| PCP044900 | 6,934634441 | 7,159871337 | 7,156538193 | 6,431790083 | PCP044900 | XM_009354508 |
| PCP044907 | 8,42488011  | 8,28692734  | 8,315919398 | 8,233619677 |           |              |
| PCP044909 | 7,28845085  | 6,914923239 | 7,674757228 | 7,300764373 |           |              |
| PCP044921 | 6,672425342 | 6,574858391 | 7,173227395 | 7,383704292 | PCP044921 | XM_009344313 |
| PCP044927 | 7,122362117 | 7,014913158 | 7,423494135 | 7,122362117 | PCP044927 | XM_009377240 |
| PCP044930 | 7,357552005 | 7,665335917 | 7,862141394 | 8,356099782 |           |              |
| PCP044943 | 8,207844058 | 8,323415108 | 8,520932916 | 8,739206792 | PCP044943 | XM_009346494 |
| PCP044974 | 7,847558521 | 7,845490051 | 8,011227255 | 8,815927606 |           |              |
| PCP044978 | 6,99242856  | 7,510408147 | 7,83080039  | 8,84024291  | PCP044978 | XM_008225340 |
| PCP044981 | 8,071462363 | 8,158205728 | 8,227230852 | 8,665335917 | PCP044981 | XM_008388096 |
| PCP044987 | 7,904905525 | 8,112022407 | 7,872397856 | 7,646234675 |           |              |
| PCP045009 | 7,279192684 | 7,752681699 | 8,139551352 | 8,588714636 |           |              |
| PCP045017 | 7,026025399 | 6,857980995 | 7,241554209 | 7,594921715 |           |              |
| PCP045036 | 7,372168569 | 7,494495616 | 7,456724026 | 8,112022407 | PCP045036 | XM_009341546 |
| PCP045045 | 7,14974712  | 7,163196797 | 7,333870928 | 7,90285744  | PCP045045 | XM_009375737 |
| PCP045056 | 8,357552005 | 8,220765252 | 8,407989993 | 8,705044823 | PCP045056 | XM_009373030 |
| PCP045091 | 8,336863563 | 7,922851957 | 8,127581695 | 8,238404739 | PCP045091 | XM_009349238 |
| PCP045103 | 6,677085351 | 7,029784146 | 7,238404739 | 7,587440004 |           |              |
| PCP045120 | 7,276124405 | 7,453929061 | 7,515699838 | 7,276124405 | PCP045120 | XM_008377151 |



Cluster 7

| Gene      | H1          | H2          | H3          | H4           |           |              |
|-----------|-------------|-------------|-------------|--------------|-----------|--------------|
| PCP000117 | 3,368768349 | 2,321928095 | 1,735522177 | -0,577766999 | PCP000117 | XM_018651203 |
| PCP000118 | 4,321928095 | 2,939226578 | 1,416839742 | 1,875780063  |           |              |
| PCP000123 | 2,503348735 | 3,544732656 | 2,873813198 | 0,739848103  | PCP000123 | XM_008375329 |
| PCP000167 | 3,459431619 | 2,584962501 | 2,321928095 | -0,577766999 |           |              |
| PCP000349 | 3,368768349 | 2,939226578 | 2,503348735 | 0            | PCP000349 | XM_018650428 |
| PCP000403 | 3,502075956 | 2,321928095 | 2,114367025 | 1            | PCP000403 | XM_008341822 |
| PCP000531 | 3,772941338 | 3           | 2,321928095 | 1,735522177  | PCP000531 | XM_009360571 |
| PCP000834 | 3,415488271 | 1,584962501 | 1,735522177 | 0            | PCP000834 | XR_668649    |
| PCP000924 | 3,27351589  | 2,414135533 | 1,735522177 | 0            | PCP000924 | XM_017334345 |
| PCP001002 | 2,22342255  | 3,624100895 | 3,700439718 | 1            | PCP001002 | XM_009357157 |
| PCP001203 | 1,416839742 | 3,058316496 | 2,321928095 | 0            |           |              |
| PCP001279 | 4,392317423 | 3,169925001 | 1,735522177 | 0            | PCP001279 | XM_018652359 |
| PCP002222 | 3,736604875 | 4           | 2,22342255  | 0,739848103  | PCP002222 | XM_009343022 |
| PCP002546 | 3,544732656 | 3,368768349 | 3,058316496 | 1            | PCP002546 | XR_001951292 |
| PCP002548 | 3,772941338 | 2,414135533 | 1,735522177 | 1            | PCP002548 | XM_009361676 |
| PCP002659 | 3,874796966 | 4,029452886 | 1,584962501 | -0,577766999 | PCP002659 | XM_009360713 |
| PCP002710 | 4,222650022 | 2,939226578 | 2,807354922 | 0            |           |              |
| PCP003210 | 3,058316496 | 0           | 2,807354922 | 1,220329955  | PCP003210 | XR_001952457 |
| PCP003557 | 4,029452886 | 3,169925001 | 2,503348735 | 0            | PCP003557 | XM_009351112 |
| PCP003749 | 0,739848103 | 5,513174885 | 2,503348735 | 1            | PCP003749 | XM_008376256 |
| PCP004287 | 1,220329955 | 5,058749412 | 2,737686761 | 1,220329955  | PCP004287 | XM_009371711 |
| PCP004383 | 0           | 4,272769732 | 5,309976492 | 0            |           |              |
| PCP005221 | 3,459431619 | 1,584962501 | 3,368768349 | 0,739848103  | PCP005221 | XM_009340854 |
| PCP005383 | 4,544114402 | 3,169925001 | 1           | 1,220329955  | PCP005383 | XM_009375906 |
| PCP005698 | 2,503348735 | 2           | 2,737686761 | 0            | PCP005698 | XM_008357087 |
| PCP006023 | 2,737686761 | 2,22342255  | 2,321928095 | 0            | PCP006023 | XM_009365560 |
| PCP006133 | 3,368768349 | 2,807354922 | 2,321928095 | 0            | PCP006133 | XM_009340436 |
| PCP006480 | 3,221877081 | 2,22342255  | 2,114367025 | 0            | PCP006480 | XM_008395200 |
| PCP006656 | 3,772941338 | 3,058316496 | 2,503348735 | 1,584962501  | PCP006656 | XM_008366386 |
| PCP007117 | 4,059182199 | 1           | 2,503348735 | 1            | PCP007117 | XM_009343165 |
| PCP007178 | 1,735522177 | 3,27351589  | 2,584962501 | 0            |           |              |
| PCP007297 | 3,058316496 | 2,807354922 | 2,939226578 | 0            | PCP007297 | XM_008375174 |
| PCP007847 | 3,169925001 | 2,807354922 | 1,735522177 | -1,59946207  | PCP007847 | XM_018644501 |
| PCP007969 | 3,840966704 | 2,873813198 | 1,735522177 | 0,411426246  |           |              |
| PCP008058 | 2,114367025 | 2,873813198 | 1,875780063 | 0            | PCP008058 | XM_008359291 |
| PCP008288 | 3,27351589  | 3           | 2,321928095 | 0            | PCP008288 | XM_009363996 |
| PCP008575 | 2,321928095 | 2,6622055   | 1,735522177 | 0            | PCP008575 | XM_018648080 |
| PCP008875 | 3,321928095 | 3,169925001 | 2,6622055   | 0            | PCP008875 | XM_017335268 |
| PCP009103 | 3,415488271 | 4,143230135 | 2,807354922 | 0            | PCP009103 | XM_009365974 |
| PCP009216 | 3,874796966 | 2,22342255  | 2,873813198 | 1            | PCP009216 | XM_009342138 |
| PCP009336 | 3,116031993 | 2,873813198 | 2,737686761 | 0            | PCP009336 | XM_009365146 |
| PCP009469 | 4,029452886 | 2,584962501 | 2,22342255  | 0,739848103  | PCP009469 | XM_008373381 |
| PCP009536 | 4,297925053 | 2,6622055   | 2,584962501 | 0            |           |              |

|           |             |             |              |              |           |              |
|-----------|-------------|-------------|--------------|--------------|-----------|--------------|
| PCP009585 | 3,969933275 | 2,737686761 | 2,503348735  | 0            |           |              |
| PCP009808 | 2,873813198 | 2,584962501 | 1,416839742  | 0            | PCP009808 | XM_018646706 |
| PCP009922 | 4,480911346 | 3,840966704 | 2,22342255   | -0,577766999 |           |              |
| PCP010004 | 2,807354922 | 2,737686761 | 1,735522177  | 0            | PCP010004 | XM_009364978 |
| PCP010006 | 0,739848103 | 3,116031993 | 3,969933275  | 0,411426246  | PCP010006 | XM_009364980 |
| PCP010035 | 3,772941338 | 3,27351589  | 2            | 0,411426246  | PCP010035 | XM_009365013 |
| PCP010109 | 2,6622055   | 1,735522177 | 2,114367025  | 0            | PCP010109 | XM_009357461 |
| PCP010700 | 2,503348735 | 1           | 2,737686761  | 0            | PCP010700 | XM_008353476 |
| PCP010818 | 1,875780063 | 4,73714592  | 4,169925001  | 0            | PCP010818 | XM_009363629 |
| PCP011347 | 3,840966704 | 2,584962501 | 3,116031993  | 0,411426246  | PCP011347 | XM_008339178 |
| PCP011385 | 3,700439718 | 3,27351589  | 2,584962501  | 1,220329955  | PCP011385 | XM_008354048 |
| PCP011392 | 2,503348735 | 6,420718183 | 1,416839742  | 0            | PCP011392 | XM_006450957 |
| PCP012201 | 2,584962501 | 1,416839742 | 2,737686761  | 0            |           |              |
| PCP012344 | 3,368768349 | 3,169925001 | 2,22342255   | -0,577766999 | PCP012344 | XM_018651941 |
| PCP012560 | 3,459431619 | 2,737686761 | 1,220329955  | 0            | PCP012560 | XM_009336602 |
| PCP012676 | 3,502075956 | 2,6622055   | 2,414135533  | 0            | PCP012676 | XM_009361149 |
| PCP013044 | 2,873813198 | 2,503348735 | 2,737686761  | 0            |           |              |
| PCP013424 | 2,414135533 | 3,584962501 | 2,584962501  | 1            | PCP013424 | XM_009370823 |
| PCP013616 | 3,736604875 | 2,873813198 | 1,416839742  | 1            | PCP013616 | XM_009369621 |
| PCP013697 | 3,415488271 | 1,220329955 | 3,169925001  | 0,739848103  | PCP013697 | XM_018645755 |
| PCP014128 | 3,169925001 | 3,584962501 | 1,875780063  | 0,411426246  | PCP014128 | XM_009359187 |
| PCP014734 | 3,700439718 | 0,411426246 | 2,737686761  | 0            | PCP014734 | XM_009366288 |
| PCP014789 | 3,544732656 | 1,416839742 | 2            | -0,577766999 | PCP014789 | XM_009370288 |
| PCP015476 | 4,029452886 | 3,169925001 | 2,584962501  | 1,220329955  |           |              |
| PCP015752 | 3,969933275 | 3,584962501 | 2,22342255   | 0            | PCP015752 | XM_009354740 |
| PCP015762 | 3,459431619 | 1,416839742 | 1,735522177  | 0,739848103  | PCP015762 | XM_008387269 |
| PCP017539 | 3,663344619 | 3,415488271 | 2,939226578  | 1            | PCP017539 | XM_009353124 |
| PCP018019 | 4,247927513 | 3,368768349 | 2,6622055    | 0            |           |              |
| PCP018119 | 3,459431619 | 3           | 1,416839742  | 0,739848103  | PCP018119 | XM_009358338 |
| PCP018239 | 0           | 5,309976492 | 2,321928095  | 2            | PCP018239 | XM_009361266 |
| PCP019102 | 3,27351589  | 1,584962501 | 2            | 0,739848103  | PCP019102 | XM_009340088 |
| PCP020459 | 3,116031993 | 1,416839742 | 2,114367025  | 0            | PCP020459 | XM_018650951 |
| PCP020578 | 3,27351589  | 2,584962501 | 1,584962501  | 0,411426246  |           |              |
| PCP020869 | 3,807354922 | 2,114367025 | 2,321928095  | 1,220329955  | PCP020869 | XM_018652120 |
| PCP021247 | 2           | 3,584962501 | 2,6622055    | 1            | PCP021247 | XM_018646539 |
| PCP021319 | 2,873813198 | 3           | 3,584962501  | 0            | PCP021319 | XM_009345566 |
| PCP021707 | 3,624100895 | 2,584962501 | 2,503348735  | 1,416839742  | PCP021707 | XM_009348714 |
| PCP021810 | 2,939226578 | 2,22342255  | 1,735522177  | 0            | PCP021810 | XM_009340481 |
| PCP022102 | 3           | 3,058316496 | 2,22342255   | 0            | PCP022102 | XM_009361516 |
| PCP022128 | 4,480911346 | 2,6622055   | 1,584962501  | 0            | PCP022128 | XM_008362333 |
| PCP022356 | 3,415488271 | 2,584962501 | 2,321928095  | -0,577766999 | PCP022356 | XM_009366828 |
| PCP022615 | 6,339850003 | 5,260402093 | -0,577766999 | -1,59946207  |           |              |
| PCP022719 | 1,584962501 | 5,961854808 | 1,416839742  | 2,873813198  |           |              |
| PCP022859 | 3,584962501 | 3,116031993 | 1            | 0            |           |              |
| PCP023637 | 5           | 4,414812061 | 0            | 0,411426246  | PCP023637 | XM_009377498 |
| PCP023650 | 3,502075956 | 2,873813198 | 2,22342255   | 0            | PCP023650 | XM_018649835 |

|           |             |             |             |              |           |              |
|-----------|-------------|-------------|-------------|--------------|-----------|--------------|
| PCP023806 | 1,416839742 | 3,415488271 | 3,27351589  | 0            | PCP023806 | XM_009356771 |
| PCP024063 | 2,414135533 | 3,736604875 | 3,700439718 | 0,739848103  |           |              |
| PCP024366 | 4,437627248 | 3,772941338 | 2,873813198 | 0            |           |              |
| PCP024557 | 4,857980995 | 2,807354922 | 0,411426246 | 2,584962501  | PCP024557 | XM_009379548 |
| PCP024618 | 3,807354922 | 2,807354922 | 1,875780063 | 2            | PCP024618 | XM_017323630 |
| PCP024956 | 0,739848103 | 3,938285792 | 3,27351589  | 1,875780063  | PCP024956 | XM_008392607 |
| PCP025052 | 3,368768349 | 2,321928095 | 1,220329955 | 0            |           |              |
| PCP025059 | 2,737686761 | 5,297558281 | 1,735522177 | 0,739848103  | PCP025059 | XM_009346316 |
| PCP025368 | 3,502075956 | 3,736604875 | 3           | 0            | PCP025368 | XM_008379041 |
| PCP026470 | 2,6622055   | 3,459431619 | 4,34553831  | 0            |           |              |
| PCP026736 | 2           | 2,737686761 | 2           | 0            | PCP026736 | XM_008344463 |
| PCP026910 | 2,939226578 | 3,544732656 | 2,321928095 | 0            | PCP026910 | XM_018651334 |
| PCP026997 | 3,27351589  | 2,414135533 | 2,321928095 | 0            | PCP026997 | XM_009347329 |
| PCP027414 | 3,169925001 | 4,143230135 | 3,840966704 | -0,577766999 | PCP027414 | XM_009379125 |
| PCP028160 | 3           | 2,807354922 | 1,735522177 | 0            | PCP028160 | XM_009361397 |
| PCP028277 | 2,503348735 | 1,735522177 | 2,114367025 | 0            |           |              |
| PCP029766 | 3,221877081 | 3,700439718 | 1,416839742 | 0,411426246  | PCP029766 | XM_009339120 |
| PCP030782 | 4,059182199 | 3,058316496 | 2,414135533 | 0            |           |              |
| PCP030819 | 4,502712486 | 2,321928095 | 1,220329955 | 0            | PCP030819 | XM_008346593 |
| PCP031001 | 2,6622055   | 2,414135533 | 2,807354922 | 0            | PCP031001 | XM_008367346 |
| PCP032188 | 3,321928095 | 2,503348735 | 2,22342255  | 0            | PCP032188 | XM_008379456 |
| PCP032802 | 3,415488271 | 2           | 3,368768349 | 0,411426246  | PCP032802 | XM_009340838 |
| PCP033131 | 3,27351589  | 3           | 1,584962501 | 0,411426246  | PCP033131 | XM_009367366 |
| PCP034125 | 4,544114402 | 0           | 3,874796966 | 0            | PCP034125 | XM_009356910 |
| PCP034272 | 3,27351589  | 3,116031993 | 3           | 0            |           |              |
| PCP034358 | 3,874796966 | 3,321928095 | 1,416839742 | 1,875780063  | PCP034358 | XM_009345685 |
| PCP034897 | 3,321928095 | 1,875780063 | 1,735522177 | 0            | PCP034897 | XM_018646965 |
| PCP035959 | 3,584962501 | 1,584962501 | 2,6622055   | 0,411426246  | PCP035959 | XM_009348483 |
| PCP036209 | 4,564987801 | 3,840966704 | 1           | 1            | PCP036209 | XM_009369309 |
| PCP036392 | 4,169925001 | 2,737686761 | 1,735522177 | 0            |           |              |
| PCP036471 | 2,584962501 | 2,114367025 | 2,321928095 | 0            |           |              |
| PCP036488 | 3,840966704 | 3,544732656 | 2,22342255  | 1            |           |              |
| PCP036833 | 3,906890596 | 3           | 2,114367025 | 0,411426246  | PCP036833 | XM_009364743 |
| PCP037168 | 2           | 2,737686761 | 2,22342255  | 0            |           |              |
| PCP037435 | 2,503348735 | 3,368768349 | 2,414135533 | 0            | PCP037435 | XM_009373783 |
| PCP038753 | 3,874796966 | 3,058316496 | 3           | 1            | PCP038753 | XM_009352739 |
| PCP038901 | 3,415488271 | 2,114367025 | 2,114367025 | -0,577766999 | PCP038901 | XM_008390889 |
| PCP039947 | 3           | 2,503348735 | 2           | -0,577766999 |           |              |
| PCP040285 | 3,663344619 | 3,415488271 | 2,584962501 | 0,411426246  | PCP040285 | XR_524702    |
| PCP040769 | 4,321928095 | 3,624100895 | 3,058316496 | 0            |           |              |
| PCP042186 | 4,222650022 | 3,459431619 | 1,416839742 | 1,584962501  |           |              |
| PCP042372 | 3,772941338 | 1,416839742 | 2,939226578 | 1,735522177  |           |              |
| PCP042625 | 0           | 4,985044962 | 6,619559738 | 0            | PCP042625 | XM_009336751 |
| PCP043140 | 0           | 7,076815597 | 1,220329955 | 1,735522177  |           |              |
| PCP043254 | 0           | 3,502075956 | 4,321928095 | 0            | PCP043254 | XR_669773    |
| PCP043630 | 2,114367025 | 4,34553831  | 2,503348735 | 2,321928095  | PCP043630 | XM_009373950 |

|           |             |             |             |              |           |              |
|-----------|-------------|-------------|-------------|--------------|-----------|--------------|
| PCP043930 | 2,807354922 | 3,700439718 | 3,544732656 | 0,411426246  |           |              |
| PCP044442 | 3,624100895 | 2,6622055   | 1,735522177 | 0,411426246  | PCP044442 | XM_017331535 |
| PCP044456 | 3,058316496 | 3,736604875 | 2,939226578 | 0            | PCP044456 | XM_008390352 |
| PCP044510 | 3,700439718 | 1,584962501 | 3,415488271 | 0,411426246  | PCP044510 | XM_018649265 |
| PCP044594 | 3,624100895 | 3,459431619 | 2,321928095 | 0            | PCP044594 | XM_009366112 |
| PCP044786 | 1,584962501 | 6,534030467 | 1,875780063 | 1,735522177  | PCP044786 | XM_007226218 |
| PCP044894 | 2,321928095 | 1,416839742 | 2,22342255  | 0            |           |              |
| PCP044965 | 3,544732656 | 3,321928095 | 2,873813198 | -0,577766999 | PCP044965 | XM_009360005 |

*Cluster 8*

| <b>Gene</b> | <b>H1</b>   | <b>H2</b>   | <b>H3</b>   | <b>H4</b>   |           |              |
|-------------|-------------|-------------|-------------|-------------|-----------|--------------|
| PCP000019   | 4,841469999 | 3,938285792 | 4,087462841 | 3,624100895 | PCP000019 | XR_665912    |
| PCP000056   | 4,297925053 | 2,584962501 | 3,27351589  | 2,6622055   | PCP000056 | XM_009350701 |
| PCP000092   | 5,459431619 | 4,029452886 | 3,736604875 | 2,6622055   | PCP000092 | XM_008375294 |
| PCP000114   | 4,247927513 | 3,116031993 | 3,700439718 | 2,807354922 |           |              |
| PCP000171   | 4,272769732 | 3,906890596 | 3,700439718 | 2,807354922 | PCP000171 | XM_008381119 |
| PCP000193   | 4,34553831  | 3,415488271 | 3,700439718 | 2,737686761 | PCP000193 | XM_018643791 |
| PCP000387   | 4,34553831  | 3,906890596 | 2,939226578 | 2,6622055   | PCP000387 | XM_008341840 |
| PCP000568   | 4,841469999 | 4,790250739 | 4,34553831  | 2,807354922 |           |              |
| PCP000740   | 3,906890596 | 4,392317423 | 3,906890596 | 2,503348735 | PCP000740 | XM_009340769 |
| PCP000874   | 4,544114402 | 3,415488271 | 2,873813198 | 2,939226578 |           |              |
| PCP000907   | 4,321928095 | 4,369466484 | 2,6622055   | 3           | PCP000907 | XM_008372851 |
| PCP000917   | 5,142821844 | 3,772941338 | 4,247927513 | 1,416839742 |           |              |
| PCP000920   | 4,222650022 | 4,059182199 | 3,938285792 | 2,584962501 | PCP000920 | XM_017325918 |
| PCP000942   | 4,459431619 | 4,392317423 | 3,584962501 | 2,807354922 |           |              |
| PCP000950   | 4,604664415 | 4,857980995 | 3,938285792 | 3,663344619 | PCP000950 | XM_018651193 |
| PCP001519   | 3,700439718 | 4,321928095 | 3,502075956 | 2,114367025 | PCP001519 | XM_008345255 |
| PCP001655   | 5,115615931 | 4,890933022 | 4,662775172 | 3           | PCP001655 | XM_009355878 |
| PCP001855   | 4,369466484 | 2,584962501 | 3,169925001 | 1,416839742 |           |              |
| PCP001865   | 3,221877081 | 5,681730355 | 2,584962501 | 3           | PCP001865 | XM_009369970 |
| PCP001957   | 4,143230135 | 5,260402093 | 4,584962501 | 4,196134881 | PCP001957 | XM_009374565 |
| PCP001968   | 4,115199749 | 3,663344619 | 2,6622055   | 2,584962501 | PCP001968 | XM_009374586 |
| PCP002022   | 4,087462841 | 3           | 2,114367025 | 2,503348735 | PCP002022 | XM_017328092 |
| PCP002044   | 4,392317423 | 4,115199749 | 3,459431619 | 3,058316496 | PCP002044 | XM_008349271 |
| PCP002172   | 4,297925053 | 4,584962501 | 4,624685811 | 2,939226578 | PCP002172 | XM_017333443 |
| PCP002193   | 5,115615931 | 4,247927513 | 3,502075956 | 3,459431619 | PCP002193 | XM_009375613 |
| PCP002332   | 4,874305166 | 3,502075956 | 4,584962501 | 1,735522177 |           |              |
| PCP002830   | 4,682011391 | 4,682011391 | 1,584962501 | 1,584962501 | PCP002830 | XM_018647411 |
| PCP002867   | 5,554588852 | 4,544114402 | 3,736604875 | 2,873813198 | PCP002867 | XM_009344743 |
| PCP002933   | 5,345893086 | 4,807354922 | 4,297925053 | 2,807354922 | PCP002933 | XM_009369332 |
| PCP003049   | 3,969933275 | 5,866166169 | 4,604664415 | 3,415488271 | PCP003049 | XM_009356577 |
| PCP003123   | 4,824258697 | 4,272769732 | 4,682011391 | 3,663344619 | PCP003123 | XM_008394017 |
| PCP003322   | 5,222263604 | 4,392317423 | 3,584962501 | 2,321928095 |           |              |
| PCP003399   | 4,938756261 | 3,624100895 | 4,392317423 | 3,116031993 | PCP003399 | XM_018645946 |
| PCP003421   | 4,874305166 | 2,503348735 | 3,544732656 | 2,873813198 | PCP003421 | XM_009361215 |
| PCP003533   | 4,459431619 | 4           | 3,663344619 | 3,169925001 | PCP003533 | XM_009378996 |

|           |             |             |             |             |           |              |
|-----------|-------------|-------------|-------------|-------------|-----------|--------------|
| PCP003541 | 4,64385619  | 3,807354922 | 5,073391816 | 3,502075956 | PCP003541 | XM_009378406 |
| PCP003729 | 6,163297449 | 4,115199749 | 3,368768349 | 3,700439718 |           |              |
| PCP003744 | 4,64385619  | 4,857980995 | 3,584962501 | 1,875780063 | PCP003744 | XM_008376346 |
| PCP003967 | 3,938285792 | 4,059182199 | 2,939226578 | 1,220329955 | PCP003967 | XM_009362304 |
| PCP004146 | 4,857980995 | 4,700439718 | 3,663344619 | 3,584962501 | PCP004146 | NM_001293944 |
| PCP004208 | 4,143230135 | 2,414135533 | 2,737686761 | 1,584962501 | PCP004208 | XM_009355922 |
| PCP004231 | 4,857980995 | 3,938285792 | 4,143230135 | 3,807354922 | PCP004231 | XM_018650080 |
| PCP004560 | 4,754887502 | 4,564987801 | 4,321928095 | 3,584962501 | PCP004560 | XM_009378850 |
| PCP004565 | 3,938285792 | 4,222650022 | 3,221877081 | 2,584962501 |           |              |
| PCP004586 | 3,906890596 | 3           | 4,544114402 | 2,584962501 | PCP004586 | XM_008350967 |
| PCP004602 | 5,087462841 | 4,480911346 | 4,414812061 | 4,029452886 | PCP004602 | XM_008380666 |
| PCP004664 | 2,807354922 | 4,272769732 | 1,875780063 | 2,6622055   | PCP004664 | XM_009370967 |
| PCP004938 | 3,906890596 | 3,116031993 | 2,503348735 | 1,584962501 | PCP004938 | XM_008375294 |
| PCP004965 | 4,414812061 | 4,34553831  | 4,34553831  | 3,221877081 | PCP004965 | XM_009338928 |
| PCP004971 | 5,59484709  | 4,95419631  | 4,321928095 | 2,807354922 | PCP004971 | XM_018643119 |
| PCP005471 | 4,414812061 | 4,523561956 | 4,169925001 | 3,169925001 | PCP005471 | XM_009346137 |
| PCP005503 | 3,221877081 | 3,938285792 | 4,824258697 | 2,414135533 | PCP005503 | XM_009380633 |
| PCP005506 | 4,369466484 | 4,115199749 | 4,059182199 | 2,939226578 |           |              |
| PCP005562 | 5,48123435  | 4,64385619  | 4,34553831  | 3,807354922 | PCP005562 | XR_001951281 |
| PCP005564 | 4,222650022 | 3           | 2,873813198 | 2,414135533 | PCP005564 | XM_009354149 |
| PCP005658 | 4,754887502 | 4,059182199 | 4,718635616 | 3,502075956 |           |              |
| PCP005661 | 4,790250739 | 3,840966704 | 4,414812061 | 2,503348735 | PCP005661 | XM_009370675 |
| PCP005727 | 5,309976492 | 4,64385619  | 3,938285792 | 2,584962501 | PCP005727 | XM_009351469 |
| PCP005749 | 4,059182199 | 3,700439718 | 4,772413555 | 3,27351589  | PCP005749 | XM_009357859 |
| PCP005810 | 4,95419631  | 4,772413555 | 2,873813198 | 2,584962501 | PCP005810 | XM_009346180 |
| PCP005904 | 3,459431619 | 5,380937195 | 4,544114402 | 3,840966704 | PCP005904 | XM_009368644 |
| PCP006683 | 4,890933022 | 4,890933022 | 3,807354922 | 2,6622055   |           |              |
| PCP006786 | 5,273142859 | 3,969933275 | 4,523561956 | 3,663344619 | PCP006786 | XM_018646433 |
| PCP006880 | 5,196528361 | 4,584962501 | 3,840966704 | 3,415488271 |           |              |
| PCP006949 | 2,584962501 | 6,732404887 | 3,058316496 | 3,058316496 |           |              |
| PCP006992 | 4,222650022 | 5,235344128 | 4,437627248 | 4,222650022 | PCP006992 | XM_018648503 |
| PCP007180 | 4,564987801 | 3,663344619 | 3,415488271 | 3,321928095 | PCP007180 | XM_018646695 |
| PCP007213 | 4,857980995 | 4,682011391 | 4,682011391 | 3,874796966 | PCP007213 | XM_017331851 |
| PCP007237 | 5           | 4,906890596 | 4,73714592  | 3,058316496 | PCP007237 | XM_008379759 |
| PCP007373 | 5,169925001 | 3,736604875 | 4,222650022 | 4,222650022 |           |              |
| PCP007595 | 5,260402093 | 5,044394119 | 4,059182199 | 3,27351589  | PCP007595 | XM_009373947 |
| PCP007596 | 2,807354922 | 4,564987801 | 3,169925001 | 2,503348735 | PCP007596 | XM_009373950 |
| PCP007614 | 3,736604875 | 3,415488271 | 3           | 1,584962501 | PCP007614 | XM_009363916 |
| PCP007739 | 4,196134881 | 3,459431619 | 2,503348735 | 2,414135533 | PCP007739 | NM_001328842 |
| PCP007769 | 4,662775172 | 4,247927513 | 4           | 1,584962501 | PCP007769 | XM_009349918 |
| PCP007928 | 4,059182199 | 2,737686761 | 2           | 2,414135533 | PCP007928 | XM_018643513 |
| PCP008041 | 3,736604875 | 3,321928095 | 2,737686761 | 1,416839742 | PCP008041 | XM_017333688 |
| PCP008154 | 4,564987801 | 4,480911346 | 4,682011391 | 3,169925001 | PCP008154 | XM_018650554 |
| PCP008158 | 3,700439718 | 3,169925001 | 3,058316496 | 1,220329955 | PCP008158 | XM_009372355 |
| PCP008258 | 5,297558281 | 4,700439718 | 4,73714592  | 3,415488271 |           |              |
| PCP008276 | 4,369466484 | 3,502075956 | 3,700439718 | 2,6622055   | PCP008276 | XM_009363981 |

|           |             |             |             |             |           |              |
|-----------|-------------|-------------|-------------|-------------|-----------|--------------|
| PCP008315 | 3,368768349 | 4,718635616 | 4,459431619 | 2,807354922 | PCP008315 | XM_008391439 |
| PCP008534 | 4,564987801 | 3,840966704 | 4,087462841 | 3           | PCP008534 | XM_009381428 |
| PCP008573 | 4,790250739 | 3,840966704 | 3,584962501 | 3,169925001 | PCP008573 | XM_009360970 |
| PCP008851 | 4,222650022 | 3,459431619 | 2,939226578 | 2,584962501 | PCP008851 | XM_008377522 |
| PCP008974 | 5,014801602 | 4,437627248 | 3,624100895 | 4,087462841 | PCP008974 | XM_008343268 |
| PCP008979 | 4,754887502 | 3,772941338 | 4,459431619 | 3,169925001 | PCP008979 | XM_009367087 |
| PCP008980 | 4,807354922 | 3,807354922 | 3,736604875 | 3,221877081 |           |              |
| PCP009121 | 5,369117459 | 4,95419631  | 4,247927513 | 3,700439718 | PCP009121 | XM_009373234 |
| PCP009169 | 4,564987801 | 3,938285792 | 3,415488271 | 2,873813198 | PCP009169 | XM_009378024 |
| PCP009172 | 4,564987801 | 3,969933275 | 4,196134881 | 3,058316496 | PCP009172 | XM_008342943 |
| PCP009222 | 4,938756261 | 4,584962501 | 4,682011391 | 3,772941338 | PCP009222 | XM_017335744 |
| PCP009257 | 5,297558281 | 4,196134881 | 4           | 2,414135533 | PCP009257 | XM_009340088 |
| PCP009620 | 3,772941338 | 4,824258697 | 4,029452886 | 3,938285792 | PCP009620 | XM_009358661 |
| PCP009832 | 5,866166169 | 5,57500972  | 4,247927513 | 2           | PCP009832 | XM_018644752 |
| PCP009854 | 4,841469999 | 4,624685811 | 4,169925001 | 3,584962501 | PCP009854 | XM_009354783 |
| PCP009883 | 4,906890596 | 4,029452886 | 3,772941338 | 3,368768349 | PCP009883 | XM_009357773 |
| PCP009888 | 3,27351589  | 6,254178286 | 4,985044962 | 3,368768349 |           |              |
| PCP010056 | 2,737686761 | 6,279285561 | 4           | 2,584962501 | PCP010056 | XM_009350804 |
| PCP010210 | 3,938285792 | 4,523561956 | 4,321928095 | 3,321928095 |           |              |
| PCP010220 | 3,624100895 | 4,059182199 | 3,415488271 | 2,414135533 | PCP010220 | XM_009373517 |
| PCP010384 | 5,02989455  | 3,906890596 | 3,700439718 | 3           |           |              |
| PCP010400 | 4,392317423 | 2,584962501 | 3,27351589  | 2,22342255  | PCP010400 | XM_017327374 |
| PCP010426 | 4,718635616 | 4,321928095 | 4,480911346 | 3,058316496 |           |              |
| PCP010452 | 4,247927513 | 3,368768349 | 2,939226578 | 2,807354922 | PCP010452 | XM_008378920 |
| PCP010519 | 4,584962501 | 3,27351589  | 3,058316496 | 3,502075956 | PCP010519 | XM_008383244 |
| PCP010597 | 4,087462841 | 3,584962501 | 2,22342255  | 2           | PCP010597 | NM_001328990 |
| PCP010680 | 4,059182199 | 4,34553831  | 3,938285792 | 2,939226578 | PCP010680 | XM_009366247 |
| PCP010930 | 4,222650022 | 4,754887502 | 4,029452886 | 3,544732656 | PCP010930 | XM_009339893 |
| PCP011154 | 4,807354922 | 4,247927513 | 4,059182199 | 3,874796966 | PCP011154 | XM_008382537 |
| PCP011203 | 4,169925001 | 4,459431619 | 4,969472865 | 3,874796966 | PCP011203 | XM_009368506 |
| PCP011326 | 2,6622055   | 4,624685811 | 3,544732656 | 2,807354922 | PCP011326 | XM_009370598 |
| PCP011342 | 4,64385619  | 4,95419631  | 2,873813198 | 2,22342255  | PCP011342 | XM_009370572 |
| PCP011373 | 4,369466484 | 4,059182199 | 3,807354922 | 2,584962501 | PCP011373 | XM_009370538 |
| PCP011394 | 4,938756261 | 4,874305166 | 4,790250739 | 3,27351589  |           |              |
| PCP011478 | 4,480911346 | 4,321928095 | 4,414812061 | 3,221877081 | PCP011478 | XM_009355207 |
| PCP011480 | 5,044394119 | 3,906890596 | 4,95419631  | 4,196134881 | PCP011480 | XM_009355204 |
| PCP011591 | 4,922673593 | 4,247927513 | 4,392317423 | 3,624100895 | PCP011591 | XM_009380050 |
| PCP011636 | 4,459431619 | 3,840966704 | 2,22342255  | 4,34553831  | PCP011636 | XM_008341779 |
| PCP011646 | 4,392317423 | 3,840966704 | 4,169925001 | 2,414135533 | PCP011646 | XM_008341797 |
| PCP011753 | 4,718635616 | 3,116031993 | 3,874796966 | 3,415488271 | PCP011753 | XM_009336102 |
| PCP011921 | 3,736604875 | 3,415488271 | 3,502075956 | 1,416839742 |           |              |
| PCP012000 | 4,115199749 | 4,624685811 | 4,938756261 | 3,700439718 | PCP012000 | XM_009359876 |
| PCP012001 | 5,156639311 | 4,718635616 | 4,321928095 | 3,415488271 | PCP012001 | XM_009359877 |
| PCP012075 | 4,392317423 | 3,772941338 | 3,544732656 | 2,6622055   | PCP012075 | XM_009343478 |
| PCP012172 | 4,95419631  | 5,02989455  | 4,321928095 | 2,873813198 | PCP012172 | XM_009363678 |
| PCP012227 | 5,169925001 | 5,984817174 | 4,807354922 | 1           |           |              |

|           |             |             |             |             |           |              |  |
|-----------|-------------|-------------|-------------|-------------|-----------|--------------|--|
| PCP012345 | 3,058316496 | 4,196134881 | 4,459431619 | 2,737686761 |           |              |  |
| PCP012359 | 5,470211457 | 4,841469999 | 3,906890596 | 2,6622055   | PCP012359 | XM_018649524 |  |
| PCP012461 | 4,392317423 | 3,906890596 | 3,807354922 | 1           | PCP012461 | XM_009358873 |  |
| PCP012540 | 4,906890596 | 4,222650022 | 4,059182199 | 3,415488271 |           |              |  |
| PCP012698 | 4,272769732 | 2           | 3,058316496 | 1,735522177 | PCP012698 | XM_008388294 |  |
| PCP012702 | 3,874796966 | 4,624685811 | 3,906890596 | 2,321928095 | PCP012702 | XR_001954107 |  |
| PCP012723 | 4,297925053 | 4,700439718 | 3,807354922 | 2,6622055   |           |              |  |
| PCP012899 | 4,874305166 | 4,34553831  | 4           | 3,906890596 | PCP012899 | XM_009367254 |  |
| PCP012913 | 3,938285792 | 2,807354922 | 2,873813198 | 2,22342255  | PCP012913 | XM_009336415 |  |
| PCP013351 | 3,874796966 | 3,969933275 | 0           | 4,34553831  |           |              |  |
| PCP013355 | 3,736604875 | 3,624100895 | 2,737686761 | 1,584962501 | PCP013355 | XM_009376285 |  |
| PCP013432 | 4,64385619  | 4,115199749 | 3,058316496 | 3,544732656 | PCP013432 | XM_009342565 |  |
| PCP013516 | 4,297925053 | 4,196134881 | 3,906890596 | 2,414135533 | PCP013516 | XM_009359275 |  |
| PCP013622 | 4,874305166 | 4,297925053 | 4,029452886 | 3,772941338 | PCP013622 | XM_009355342 |  |
| PCP013706 | 3,736604875 | 3,584962501 | 4,115199749 | 2,22342255  | PCP013706 | XM_009371150 |  |
| PCP013937 | 4,874305166 | 4,059182199 | 3,221877081 | 1,416839742 | PCP013937 | XM_008360308 |  |
| PCP013947 | 5,60496087  | 4,143230135 | 3,169925001 | 3,221877081 | PCP013947 | XR_665912    |  |
| PCP014058 | 4,922673593 | 4,502712486 | 4,523561956 | 3,969933275 | PCP014058 | XM_009338844 |  |
| PCP014093 | 4,890933022 | 4,321928095 | 4,029452886 | 3,27351589  | PCP014093 | XM_009376374 |  |
| PCP014525 | 4,222650022 | 3,736604875 | 4,115199749 | 2,737686761 | PCP014525 | XM_009342434 |  |
| PCP014588 | 5,142821844 | 4,392317423 | 5,073391816 | 0           | PCP014588 | XM_008357523 |  |
| PCP014752 | 4,969472865 | 3,368768349 | 3,807354922 | 3,772941338 |           |              |  |
| PCP015103 | 4,938756261 | 5,115615931 | 4,459431619 | 3,663344619 | PCP015103 | XM_009377286 |  |
| PCP015139 | 4,523561956 | 5,392317423 | 5,044394119 | 3,169925001 | PCP015139 | XM_009379474 |  |
| PCP015275 | 5,014801602 | 4,414812061 | 3,874796966 | 1,416839742 | PCP015275 | XM_009365806 |  |
| PCP015464 | 4,059182199 | 4,564987801 | 4,392317423 | 1,416839742 | PCP015464 | XM_008390080 |  |
| PCP015465 | 4,64385619  | 3,969933275 | 4,824258697 | 3,058316496 | PCP015465 | XM_008371984 |  |
| PCP015694 | 5,426264755 | 4,790250739 | 3,906890596 | 2,503348735 | PCP015694 | XM_008357319 |  |
| PCP015739 | 4,392317423 | 3,969933275 | 2,6622055   | 2,414135533 | PCP015739 | XM_009361782 |  |
| PCP016435 | 5           | 4,143230135 | 3,736604875 | 4,34553831  |           |              |  |
| PCP016452 | 4,029452886 | 3,938285792 | 3,624100895 | 1,584962501 | PCP016452 | XM_017330975 |  |
| PCP016470 | 4,414812061 | 3,169925001 | 2,807354922 | 2,414135533 | PCP016470 | XM_009351699 |  |
| PCP016502 | 5,02989455  | 4,682011391 | 3,502075956 | 3,663344619 | PCP016502 | XM_008342332 |  |
| PCP016512 | 5,247927513 | 4,523561956 | 4,247927513 | 3,544732656 | PCP016512 | XM_008361801 |  |
| PCP016598 | 4,115199749 | 3,874796966 | 3,169925001 | 1,220329955 |           |              |  |
| PCP016668 | 4,321928095 | 4,718635616 | 4,029452886 | 3,415488271 | PCP016668 | XM_009366576 |  |
| PCP016741 | 4,624685811 | 4,169925001 | 4,459431619 | 3,221877081 | PCP016741 | XM_008351056 |  |
| PCP016781 | 3,969933275 | 3,415488271 | 2,321928095 | 1,875780063 | PCP016781 | XM_009336187 |  |
| PCP016914 | 6,807354922 | 5,513174885 | 4,059182199 | 0           | PCP016914 | XM_009379185 |  |
| PCP017207 | 4,584962501 | 3,459431619 | 3,584962501 | 3,544732656 | PCP017207 | XM_009360786 |  |
| PCP017546 | 4,321928095 | 3,221877081 | 4,73714592  | 3,221877081 |           |              |  |
| PCP017674 | 4,115199749 | 3,221877081 | 3,624100895 | 2,584962501 | PCP017674 | XM_009363550 |  |
| PCP017898 | 5,285402219 | 3,221877081 | 4,392317423 | 3,584962501 | PCP017898 | XR_667876    |  |
| PCP017900 | 5,309976492 | 4,392317423 | 4,169925001 | 3,459431619 | PCP017900 | XM_018645011 |  |
| PCP017944 | 4,459431619 | 3,459431619 | 3,938285792 | 2,584962501 | PCP017944 | XM_009340801 |  |
| PCP018355 | 3,116031993 | 4,247927513 | 4           | 2,503348735 | PCP018355 | XM_009338815 |  |

|           |             |             |             |             |           |              |
|-----------|-------------|-------------|-------------|-------------|-----------|--------------|
| PCP018405 | 4,143230135 | 3,624100895 | 4,169925001 | 1,875780063 | PCP018405 | XM_009335635 |
| PCP018409 | 4,874305166 | 5,087462841 | 3,27351589  | 3,368768349 | PCP018409 | XM_008353535 |
| PCP018447 | 5           | 3,663344619 | 3,27351589  | 3,116031993 | PCP018447 | XM_009360334 |
| PCP018452 | 4,414812061 | 4,029452886 | 3,116031993 | 1           | PCP018452 | XM_008359854 |
| PCP018497 | 4,64385619  | 4,523561956 | 4,480911346 | 3,415488271 |           |              |
| PCP018920 | 4,502712486 | 3,663344619 | 3,221877081 | 1,416839742 | PCP018920 | XM_009355767 |
| PCP019466 | 4,544114402 | 3,807354922 | 3,321928095 | 3,169925001 | PCP019466 | XM_009339055 |
| PCP019493 | 4,392317423 | 4,369466484 | 4,682011391 | 3,058316496 | PCP019493 | XM_009377647 |
| PCP019501 | 3,969933275 | 3,906890596 | 4,369466484 | 2,873813198 | PCP019501 | XM_018651749 |
| PCP019610 | 4,73714592  | 3,874796966 | 3,874796966 | 2,584962501 | PCP019610 | XM_009364299 |
| PCP019655 | 4,906890596 | 4,480911346 | 4,321928095 | 3,584962501 | PCP019655 | XM_017331465 |
| PCP019979 | 4,34553831  | 2,873813198 | 2,114367025 | 1,735522177 | PCP019979 | XM_009372221 |
| PCP019987 | 3,700439718 | 4,143230135 | 2,807354922 | 2,6622055   | PCP019987 | XM_009374622 |
| PCP020002 | 3,459431619 | 5,058749412 | 4,414812061 | 3,624100895 | PCP020002 | XM_009355585 |
| PCP020255 | 4,718635616 | 4,985044962 | 4,392317423 | 4,059182199 | PCP020255 | XM_018651168 |
| PCP020305 | 4,196134881 | 3,807354922 | 3,459431619 | 1,220329955 | PCP020305 | XM_009339025 |
| PCP020343 | 4,222650022 | 3,169925001 | 3,116031993 | 2,321928095 | PCP020343 | XM_008390316 |
| PCP020355 | 5,584962501 | 4,662775172 | 3,807354922 | 3,624100895 | PCP020355 | XM_009368723 |
| PCP020396 | 5,115615931 | 4,502712486 | 4,369466484 | 3,415488271 | PCP020396 | XM_018646256 |
| PCP020409 | 4,143230135 | 3,169925001 | 3,221877081 | 2,321928095 | PCP020409 | XM_018647971 |
| PCP020510 | 4,682011391 | 4,938756261 | 3,584962501 | 2,873813198 | PCP020510 | XR_666921    |
| PCP020570 | 4,73714592  | 4,143230135 | 3,807354922 | 3,116031993 | PCP020570 | XM_018646409 |
| PCP020779 | 4,222650022 | 3,624100895 | 2,737686761 | 2,873813198 | PCP020779 | XM_018644417 |
| PCP020783 | 5,129283017 | 5,156639311 | 4,459431619 | 2,939226578 | PCP020783 | XM_009378477 |
| PCP020831 | 2,939226578 | 6,176522247 | 2,737686761 | 3,368768349 | PCP020831 | XM_018649489 |
| PCP020841 | 4,414812061 | 3,938285792 | 3,459431619 | 1,735522177 | PCP020841 | XM_009337139 |
| PCP020895 | 5,426264755 | 4,059182199 | 4,059182199 | 4,115199749 |           |              |
| PCP020898 | 4,523561956 | 3,840966704 | 3,663344619 | 2,114367025 | PCP020898 | XM_009374747 |
| PCP021141 | 3,807354922 | 3,736604875 | 3,459431619 | 1,416839742 |           |              |
| PCP021161 | 4,906890596 | 4,143230135 | 4,196134881 | 3,27351589  | PCP021161 | XM_009337258 |
| PCP021183 | 4,64385619  | 4,624685811 | 4,059182199 | 3,459431619 | PCP021183 | XM_009375034 |
| PCP021257 | 4,890933022 | 4,369466484 | 4,922673593 | 4           | PCP021257 | XM_008373357 |
| PCP021625 | 5,273142859 | 4,222650022 | 4,34553831  | 3,058316496 | PCP021625 | XM_009359463 |
| PCP021658 | 6,176522247 | 4,523561956 | 1,875780063 | 0           | PCP021658 | XM_009366643 |
| PCP021667 | 5           | 4,459431619 | 4,321928095 | 2,807354922 |           |              |
| PCP021693 | 4,73714592  | 4,502712486 | 4,222650022 | 3,624100895 | PCP021693 | XM_009356086 |
| PCP021748 | 4,874305166 | 4,857980995 | 4,369466484 | 2,873813198 | PCP021748 | XM_009358820 |
| PCP021762 | 4,985044962 | 4,169925001 | 4,115199749 | 3           | PCP021762 | XM_009359983 |
| PCP022011 | 3,544732656 | 4,73714592  | 4,321928095 | 3,459431619 |           |              |
| PCP022105 | 4,700439718 | 4,938756261 | 4,718635616 | 3,772941338 |           |              |
| PCP022247 | 4,564987801 | 4,564987801 | 4,272769732 | 2,939226578 | PCP022247 | XM_018650498 |
| PCP022364 | 4,700439718 | 4,029452886 | 3,969933275 | 3,116031993 |           |              |
| PCP022551 | 5,02989455  | 3,874796966 | 3,368768349 | 3,321928095 | PCP022551 | XM_009355485 |
| PCP022670 | 4,196134881 | 3,736604875 | 3,169925001 | 2,321928095 | PCP022670 | XM_009352436 |
| PCP023098 | 5,763677142 | 5,403608584 | 4,196134881 | 0           |           |              |
| PCP023195 | 4,115199749 | 3,700439718 | 2           | 1,735522177 | PCP023195 | XM_009351600 |



|           |             |             |             |             |           |              |
|-----------|-------------|-------------|-------------|-------------|-----------|--------------|
| PCP023645 | 5,624393382 | 4,115199749 | 2,939226578 | 1,735522177 | PCP023645 | XM_009335635 |
| PCP023882 | 3,906890596 | 5,890689878 | 3,906890596 | 4,222650022 | PCP023882 | XM_008390952 |
| PCP023916 | 4,169925001 | 3,502075956 | 1,584962501 | 2,939226578 | PCP023916 | XM_009355134 |
| PCP024226 | 5,681730355 | 4,938756261 | 4,169925001 | 2,737686761 | PCP024226 | XM_008352718 |
| PCP024317 | 4,682011391 | 4,143230135 | 3,368768349 | 1,875780063 | PCP024317 | XM_009374823 |
| PCP024370 | 4,143230135 | 4,437627248 | 3,544732656 | 2,737686761 | PCP024370 | XM_009362684 |
| PCP024491 | 4,985044962 | 4,73714592  | 4,544114402 | 3,169925001 | PCP024491 | XM_008349175 |
| PCP024628 | 4,321928095 | 3,663344619 | 3,321928095 | 0,739848103 | PCP024628 | XM_009341658 |
| PCP024726 | 4,459431619 | 5,297558281 | 4,087462841 | 4,297925053 | PCP024726 | XM_008387893 |
| PCP024844 | 3,736604875 | 3,116031993 | 2,939226578 | 1,735522177 | PCP024844 | XM_009361164 |
| PCP025044 | 4,824258697 | 3,169925001 | 2,873813198 | 0,739848103 | PCP025044 | XM_009347583 |
| PCP025082 | 4,874305166 | 4,321928095 | 3,058316496 | 3,321928095 | PCP025082 | XM_018644291 |
| PCP025102 | 4,985044962 | 4,718635616 | 4,459431619 | 3,874796966 | PCP025102 | XM_009377218 |
| PCP025127 | 4,938756261 | 4,369466484 | 4,682011391 | 3,874796966 | PCP025127 | XM_018649361 |
| PCP025240 | 4,115199749 | 4,029452886 | 3,700439718 | 2,6622055   | PCP025240 | XM_017325366 |
| PCP025367 | 3,584962501 | 4,34553831  | 3,368768349 | 2,503348735 | PCP025367 | XM_008379041 |
| PCP025395 | 5,02989455  | 4,662775172 | 4,321928095 | 2,737686761 | PCP025395 | XR_001953322 |
| PCP025528 | 4,64385619  | 4,414812061 | 3,840966704 | 3,221877081 | PCP025528 | XM_009368867 |
| PCP025657 | 4,196134881 | 3,27351589  | 3,169925001 | 0,739848103 | PCP025657 | XM_009378477 |
| PCP025793 | 4,459431619 | 3,584962501 | 2,503348735 | 2,22342255  | PCP025793 | XM_009336589 |
| PCP025936 | 4,841469999 | 5,058749412 | 4,437627248 | 3,415488271 | PCP025936 | XM_008394808 |
| PCP026165 | 5,101397952 | 4,369466484 | 4,414812061 | 2,6622055   |           |              |
| PCP026215 | 4,34553831  | 4,34553831  | 4,700439718 | 3,058316496 | PCP026215 | XM_009347773 |
| PCP026262 | 4,807354922 | 4           | 4,584962501 | 3,700439718 |           |              |
| PCP026323 | 4,502712486 | 3,169925001 | 4,087462841 | 1,416839742 | PCP026323 | XM_009345306 |
| PCP026578 | 5,044394119 | 3,969933275 | 3,544732656 | 4,414812061 | PCP026578 | XM_008376954 |
| PCP026590 | 3,624100895 | 3,459431619 | 3,807354922 | 1,416839742 | PCP026590 | XM_009356485 |
| PCP027056 | 3,544732656 | 3,27351589  | 3,221877081 | 1,220329955 | PCP027056 | XM_018646033 |
| PCP027151 | 5,345893086 | 3,874796966 | 2,737686761 | 2,414135533 |           |              |
| PCP027182 | 3,584962501 | 4,414812061 | 3,502075956 | 3,169925001 |           |              |
| PCP027202 | 5,297558281 | 4,564987801 | 3,969933275 | 3,221877081 | PCP027202 | XM_018643170 |
| PCP027568 | 5,513174885 | 5,247927513 | 4,272769732 | 3,221877081 | PCP027568 | XM_018643789 |
| PCP027587 | 4,564987801 | 3,840966704 | 0           | 4,604664415 | PCP027587 | XM_009346477 |
| PCP027600 | 4,700439718 | 3,969933275 | 4,143230135 | 3,368768349 | PCP027600 | XM_009346499 |
| PCP027639 | 4           | 4,414812061 | 4,087462841 | 2           |           |              |
| PCP027641 | 4,297925053 | 3,874796966 | 3,459431619 | 2,584962501 | PCP027641 | XM_009340650 |
| PCP027671 | 3,969933275 | 3,27351589  | 5,672425342 | 3,058316496 | PCP027671 | XM_009349608 |
| PCP027764 | 4,247927513 | 4,682011391 | 5,087462841 | 3,502075956 | PCP027764 | XM_018649288 |
| PCP027797 | 3,772941338 | 4,502712486 | 3,700439718 | 2,503348735 | PCP027797 | XM_009374286 |
| PCP027945 | 5,247927513 | 3,663344619 | 2,939226578 | 3,116031993 | PCP027945 | XM_009376512 |
| PCP028047 | 5,681730355 | 4,369466484 | 3,772941338 | 3,624100895 | PCP028047 | XM_009335398 |
| PCP028196 | 4,222650022 | 4,169925001 | 4,115199749 | 1,735522177 |           |              |
| PCP028267 | 4,222650022 | 5,169925001 | 4,459431619 | 3,058316496 | PCP028267 | XM_008342534 |
| PCP028295 | 4,700439718 | 5,273142859 | 3,584962501 | 4,247927513 |           |              |
| PCP028332 | 4,64385619  | 4,272769732 | 3,906890596 | 3,169925001 | PCP028332 | XM_018652195 |
| PCP028382 | 4,624685811 | 3,221877081 | 3,969933275 | 2,22342255  | PCP028382 | XM_009349564 |

|           |             |             |             |             |           |              |
|-----------|-------------|-------------|-------------|-------------|-----------|--------------|
| PCP028524 | 4,824258697 | 4,196134881 | 4,922673593 | 3,772941338 | PCP028524 | XM_008375595 |
| PCP028526 | 4,73714592  | 4,544114402 | 4,34553831  | 3,700439718 |           |              |
| PCP028644 | 4,922673593 | 4,369466484 | 4           | 3,116031993 |           |              |
| PCP028794 | 5,709566354 | 5,247927513 | 4,059182199 | 3,058316496 | PCP028794 | XM_009374989 |
| PCP029010 | 5,101397952 | 3,938285792 | 4,564987801 | 3,415488271 | PCP029010 | XM_009335769 |
| PCP029022 | 4,662775172 | 4,392317423 | 2,6622055   | 2,503348735 | PCP029022 | XR_001953224 |
| PCP029024 | 5,196528361 | 4,700439718 | 4,222650022 | 3,169925001 | PCP029024 | XM_009375398 |
| PCP029128 | 5,584962501 | 4,95419631  | 4,369466484 | 2,873813198 | PCP029128 | XM_008340156 |
| PCP029846 | 4,64385619  | 1,875780063 | 3           | 3,116031993 | PCP029846 | XM_018647637 |
| PCP030112 | 4,169925001 | 3,736604875 | 4,369466484 | 2,414135533 | PCP030112 | XM_008366116 |
| PCP030425 | 4,437627248 | 4,143230135 | 3,938285792 | 2,807354922 | PCP030425 | XM_009337492 |
| PCP030457 | 2,503348735 | 5,369117459 | 3,906890596 | 3,368768349 | PCP030457 | XM_009349672 |
| PCP030491 | 3,700439718 | 6,523561956 | 4           | 3,969933275 |           |              |
| PCP030697 | 5,156639311 | 4,604664415 | 3,906890596 | 1,875780063 | PCP030697 | XM_009341751 |
| PCP030728 | 4,807354922 | 4,754887502 | 3,807354922 | 2,807354922 | PCP030728 | XM_009353358 |
| PCP030814 | 4,247927513 | 4,604664415 | 3,459431619 | 3,058316496 | PCP030814 | NM_001294072 |
| PCP030840 | 4,480911346 | 3,807354922 | 3,700439718 | 2,321928095 |           |              |
| PCP030855 | 5,101397952 | 4,772413555 | 3,874796966 | 3,221877081 | PCP030855 | XM_009371932 |
| PCP031050 | 4,369466484 | 4,718635616 | 2,6622055   | 0           | PCP031050 | XM_009351008 |
| PCP031100 | 3,27351589  | 4,143230135 | 2,873813198 | 2,321928095 | PCP031100 | XM_009380882 |
| PCP031114 | 4,169925001 | 4,459431619 | 3,169925001 | 1,735522177 | PCP031114 | XM_009360070 |
| PCP031210 | 4,087462841 | 4,34553831  | 5,247927513 | 3,27351589  | PCP031210 | XM_009366088 |
| PCP031224 | 4,662775172 | 4,906890596 | 4,34553831  | 3,415488271 | PCP031224 | XM_009336626 |
| PCP031273 | 5,169925001 | 4,459431619 | 3,807354922 | 0,411426246 | PCP031273 | XM_009344316 |
| PCP031654 | 4,682011391 | 3,874796966 | 3,969933275 | 2,939226578 | PCP031654 | XR_001952698 |
| PCP031844 | 4,272769732 | 4,143230135 | 3,969933275 | 2,873813198 | PCP031844 | XM_009350909 |
| PCP031896 | 4,874305166 | 3,938285792 | 4,247927513 | 3,736604875 |           |              |
| PCP032025 | 4,392317423 | 3,938285792 | 1,875780063 | 2,114367025 |           |              |
| PCP032375 | 4,437627248 | 3,969933275 | 3,772941338 | 3,116031993 | PCP032375 | XM_009376170 |
| PCP032622 | 4,624685811 | 3,663344619 | 3,874796966 | 3,544732656 |           |              |
| PCP032878 | 5,415150205 | 4,321928095 | 3,502075956 | 0,739848103 | PCP032878 | XM_009357851 |
| PCP032881 | 3,321928095 | 4,143230135 | 4,906890596 | 3,321928095 |           |              |
| PCP033046 | 4,564987801 | 3,584962501 | 3,502075956 | 2,939226578 | PCP033046 | XM_009340997 |
| PCP033152 | 4,938756261 | 4,459431619 | 4,272769732 | 4           | PCP033152 | XM_009359493 |
| PCP033597 | 4,922673593 | 3,584962501 | 1,416839742 | 2           |           |              |
| PCP033835 | 4,874305166 | 4,029452886 | 4,029452886 | 3,700439718 | PCP033835 | XM_009357031 |
| PCP033836 | 5,115615931 | 4,523561956 | 4,169925001 | 3,663344619 | PCP033836 | XM_009357037 |
| PCP033886 | 4,682011391 | 3,772941338 | 3,700439718 | 2,414135533 | PCP033886 | XM_009363227 |
| PCP034096 | 4           | 3,169925001 | 3,27351589  | 2,321928095 |           |              |
| PCP034508 | 2,321928095 | 3,321928095 | 4,414812061 | 2,114367025 | PCP034508 | XM_009354520 |
| PCP034947 | 4           | 4,564987801 | 3,772941338 | 2,737686761 |           |              |
| PCP034953 | 7,14974712  | 6,189824559 | 0           | 0           | PCP034953 | XM_009364792 |
| PCP035298 | 5,101397952 | 4,459431619 | 4,369466484 | 3,906890596 | PCP035298 | XM_009372940 |
| PCP036482 | 4,414812061 | 3,906890596 | 1,875780063 | 2,584962501 | PCP036482 | XM_009345013 |
| PCP036522 | 4,459431619 | 3,544732656 | 4,297925053 | 3           | PCP036522 | XM_009377060 |
| PCP036761 | 5,448570626 | 4,841469999 | 3,544732656 | 3,415488271 | PCP036761 | XM_018646603 |

|           |             |             |             |              |           |              |
|-----------|-------------|-------------|-------------|--------------|-----------|--------------|
| PCP036924 | 5,073391816 | 3,906890596 | 3,906890596 | 3,938285792  | PCP036924 | XM_009367594 |
| PCP037547 | 4,922673593 | 4,523561956 | 4,459431619 | 3,874796966  | PCP037547 | XM_009347390 |
| PCP037576 | 3,906890596 | 2,22342255  | 3,938285792 | 1,416839742  |           |              |
| PCP038023 | 4,824258697 | 4,459431619 | 4,772413555 | 3,27351589   |           |              |
| PCP039116 | 3,772941338 | 3,502075956 | 3,502075956 | 1,416839742  | PCP039116 | XM_009358338 |
| PCP039311 | 4,143230135 | 4,34553831  | 2,584962501 | 2,6622055    | PCP039311 | XM_018646726 |
| PCP039351 | 5,183089461 | 4,890933022 | 1,220329955 | 0,411426246  | PCP039351 | XM_009338362 |
| PCP039467 | 4,682011391 | 4,196134881 | 4,143230135 | 3,502075956  | PCP039467 | XM_009378762 |
| PCP039702 | 5,142821844 | 4,754887502 | 2,873813198 | 2,939226578  | PCP039702 | XM_009359229 |
| PCP039813 | 4,718635616 | 4,029452886 | 3,807354922 | 3            | PCP039813 | XM_009372295 |
| PCP039844 | 4,841469999 | 0,411426246 | 3,840966704 | 2,6622055    |           |              |
| PCP040050 | 5,196528361 | 4,890933022 | 4,059182199 | 3,736604875  |           |              |
| PCP040107 | 5           | 3,772941338 | 3,624100895 | 3,772941338  |           |              |
| PCP040118 | 3,840966704 | 3,368768349 | 3           | 1,584962501  | PCP040118 | XM_009368202 |
| PCP040509 | 4,807354922 | 2,873813198 | 3,700439718 | 3,368768349  | PCP040509 | XM_008360825 |
| PCP040698 | 4,169925001 | 3,459431619 | 3,584962501 | 2,6622055    | PCP040698 | XM_009376037 |
| PCP040802 | 4,272769732 | 3,502075956 | 2,737686761 | 2            | PCP040802 | XM_008348775 |
| PCP041469 | 5,357552005 | 4,523561956 | 4,502712486 | 3,27351589   |           |              |
| PCP041761 | 4,874305166 | 3,736604875 | 4,059182199 | 3,807354922  | PCP041761 | XM_009355760 |
| PCP041844 | 4,523561956 | 3,663344619 | 0           | 3,368768349  |           |              |
| PCP042700 | 4,523561956 | 3,663344619 | 3,321928095 | 3,116031993  |           |              |
| PCP042805 | 4,718635616 | 4,772413555 | 3,368768349 | -0,577766999 | PCP042805 | XM_009354741 |
| PCP043513 | 3,874796966 | 4,196134881 | 4,544114402 | 2,414135533  | PCP043513 | XM_008382032 |
| PCP043990 | 3,321928095 | 4,523561956 | 3,502075956 | 3,116031993  | PCP043990 | XM_018642604 |
| PCP044000 | 4           | 3,502075956 | 3,27351589  | 2,503348735  |           |              |
| PCP044006 | 4,682011391 | 2,584962501 | 2,503348735 | 1,584962501  | PCP044006 | XM_009358221 |
| PCP044141 | 5,156639311 | 4,523561956 | 3,459431619 | 0            | PCP044141 | XM_009353308 |
| PCP044176 | 4,682011391 | 3,368768349 | 4,502712486 | 3            | PCP044176 | XM_009359661 |
| PCP044236 | 4,196134881 | 4,841469999 | 4,682011391 | 3,700439718  |           |              |
| PCP044309 | 3,840966704 | 3,459431619 | 2,807354922 | 2,114367025  | PCP044309 | XM_009366063 |
| PCP044441 | 3,906890596 | 2,807354922 | 3,221877081 | 1,735522177  | PCP044441 | XM_009345807 |
| PCP044736 | 4,029452886 | 4,544114402 | 3,663344619 | 2,114367025  | PCP044736 | XM_008380335 |
| PCP044845 | 4,414812061 | 4,222650022 | 2,873813198 | 2,807354922  |           |              |
| PCP045179 | 4,34553831  | 3,938285792 | 3,840966704 | 2,939226578  | PCP045179 | XM_018647787 |

Cluster\_9

| Gene      | H1          | H2          | H3          | H4          |           |              |
|-----------|-------------|-------------|-------------|-------------|-----------|--------------|
| PCP000143 | 3,116031993 | 3,169925001 | 4,841469999 | 3,502075956 | PCP000143 | XM_009378004 |
| PCP000222 | 3,321928095 | 3,969933275 | 5,044394119 | 4,906890596 | PCP000222 | XM_018643281 |
| PCP000340 | 3,415488271 | 4,523561956 | 4,369466484 | 5,196528361 | PCP000340 | XM_008349295 |
| PCP000411 | 3,415488271 | 0           | 5,196528361 | 3,415488271 | PCP000411 | XM_009369928 |
| PCP000412 | 3,27351589  | 0,739848103 | 5,101397952 | 3,058316496 | PCP000412 | XM_009369928 |
| PCP000801 | 2,414135533 | 2,807354922 | 4,544114402 | 4,297925053 | PCP000801 | XM_009350099 |
| PCP000862 | 3,058316496 | 4,824258697 | 4,392317423 | 4,938756261 |           |              |
| PCP001273 | 2,584962501 | 2,737686761 | 4,564987801 | 7,541716163 |           |              |
| PCP001307 | 3,116031993 | 3,807354922 | 4,459431619 | 5,321928095 | PCP001307 | XM_008385457 |
| PCP001647 | 0           | 3,840966704 | 4,807354922 | 3,663344619 |           |              |
| PCP001690 | 3,27351589  | 5,02989455  | 4,437627248 | 4,143230135 | PCP001690 | XM_009350830 |
| PCP002206 | 1,584962501 | 3,772941338 | 4,059182199 | 4,544114402 | PCP002206 | XM_009341083 |
| PCP002357 | 2,22342255  | 3,116031993 | 2,503348735 | 4,34553831  | PCP002357 | XM_009365929 |
| PCP002369 | 2,873813198 | 4,502712486 | 5,142821844 | 3,736604875 | PCP002369 | XM_008343257 |
| PCP004091 | 3,624100895 | 3,840966704 | 5,115615931 | 3,874796966 |           |              |
| PCP004355 | 2,737686761 | 3,169925001 | 3,807354922 | 5,129283017 | PCP004355 | XM_008370671 |
| PCP005830 | 3,321928095 | 3,502075956 | 4,922673593 | 4,754887502 | PCP005830 | XM_021977058 |
| PCP006179 | 3,700439718 | 2,807354922 | 2,114367025 | 5,044394119 | PCP006179 | XM_009358357 |
| PCP006314 | 4,392317423 | 3,415488271 | 3,116031993 | 5,369117459 | PCP006314 | XM_018648753 |
| PCP006737 | 2,503348735 | 3,459431619 | 4,700439718 | 4,890933022 | PCP006737 | XM_018650288 |
| PCP006808 | 0,739848103 | 3,700439718 | 3,624100895 | 5,533874777 |           |              |
| PCP006815 | 3,415488271 | 3,321928095 | 5,437294331 | 5,044394119 | PCP006815 | XM_008355845 |
| PCP006837 | 4,029452886 | 3,807354922 | 3,27351589  | 5,044394119 | PCP006837 | XM_017328280 |
| PCP006890 | 3,27351589  | 3           | 3,772941338 | 5,02989455  | PCP006890 | XM_009355148 |
| PCP007280 | 2,114367025 | 4,95419631  | 3,663344619 | 3,700439718 | PCP007280 | XM_009348032 |
| PCP007395 | 2,414135533 | 3           | 3,772941338 | 4,790250739 | PCP007395 | XM_009337213 |
| PCP007541 | 3,502075956 | 3,736604875 | 3,502075956 | 5,763677142 |           |              |
| PCP007558 | 2,737686761 | 3,840966704 | 4,029452886 | 5,533874777 | PCP007558 | XM_017329960 |
| PCP007973 | 0           | 5,426264755 | 5,247927513 | 5,491853096 | PCP007973 | XM_018652457 |
| PCP008180 | 2           | 3,874796966 | 4,754887502 | 5,235344128 | PCP008180 | XM_008356658 |
| PCP008473 | 0           | 3,938285792 | 5,523561956 | 3,736604875 |           |              |
| PCP008688 | 2,22342255  | 3,321928095 | 3,906890596 | 4,369466484 | PCP008688 | XM_008366023 |
| PCP008737 | 4,604664415 | 0           | 4,754887502 | 5,044394119 | PCP008737 | XM_009344816 |
| PCP008840 | 4           | 3,584962501 | 3,321928095 | 4,95419631  | PCP008840 | XM_009362430 |
| PCP008901 | 2,873813198 | 3,700439718 | 4,824258697 | 4,95419631  |           |              |
| PCP008930 | 3,321928095 | 2,22342255  | 3,368768349 | 6,176522247 | PCP008930 | XM_017323934 |
| PCP009022 | 2,114367025 | 3,874796966 | 4,480911346 | 4,059182199 |           |              |
| PCP009188 | 2,22342255  | 2,414135533 | 3,874796966 | 4,584962501 | PCP009188 | XM_009338280 |
| PCP009685 | 1,416839742 | 3,544732656 | 4,34553831  | 5,247927513 | PCP009685 | XM_008343921 |
| PCP009708 | 0,411426246 | 3,27351589  | 3,906890596 | 3,700439718 | PCP009708 | XM_008391789 |
| PCP009739 | 5,309976492 | 0,411426246 | 5,491853096 | 5,624393382 | PCP009739 | XM_009358833 |
| PCP009775 | 2           | 2,807354922 | 3,368768349 | 4,272769732 | PCP009775 | XM_009350417 |
| PCP009802 | 1,735522177 | 2,584962501 | 5,101397952 | 7,473056289 | PCP009802 | XM_008354694 |
| PCP009919 | 3,415488271 | 4,222650022 | 4,985044962 | 5,156639311 | PCP009919 | XM_018650545 |

|           |             |             |             |             |             |              |              |              |
|-----------|-------------|-------------|-------------|-------------|-------------|--------------|--------------|--------------|
| PCP010160 | 3,700439718 | 2,584962501 |             | 3           | 5,789990019 | PCP010160    | XM_009375995 |              |
| PCP010504 |             | 2           | 3,736604875 | 3,544732656 | 5,554588852 | PCP010504    | XM_009354285 |              |
| PCP010591 | 2,114367025 | 1,220329955 | 3,624100895 | 4,369466484 | PCP010591   | XM_009359972 |              |              |
| PCP010717 | 3,502075956 | 2,737686761 | 3,544732656 | 4,523561956 | PCP010717   | XM_009344608 |              |              |
| PCP010952 | 3,772941338 | 3,772941338 | 4,906890596 | 5,156639311 | PCP010952   | XM_008341625 |              |              |
| PCP011831 | 4,143230135 |             | 3           | 4,321928095 | 5,727920455 | PCP011831    | XM_008343280 |              |
| PCP011951 | 1,220329955 | 1,875780063 | 5,380937195 | 5,426264755 | PCP011951   | XM_008374667 |              |              |
| PCP012070 | 4,544114402 | 3,544732656 | 3,736604875 | 5,60496087  | PCP012070   | XM_009352004 |              |              |
| PCP012130 |             | 2           | 4,392317423 | 3,368768349 |             | 3            | PCP012130    | XR_001951418 |
| PCP012138 |             | 3           |             | 4           | 5,345893086 | 5,60496087   | PCP012138    | XM_008355191 |
| PCP012255 | 3,584962501 | 4,169925001 | 3,169925001 | 5,491853096 | PCP012255   | XM_008370743 |              |              |
| PCP012399 | 2,503348735 | 2,6622055   | 4,754887502 | 4,272769732 | PCP012399   | XM_008358632 |              |              |
| PCP012412 | 3,221877081 | 3,415488271 | 3,874796966 | 7,251056285 | PCP012412   | XM_008386869 |              |              |
| PCP012809 |             | 0           | 2,737686761 | 3,415488271 | 5,073391816 | PCP012809    | XM_009358391 |              |
| PCP013011 | 4,624685811 | 2,321928095 | 3,840966704 | 4,087462841 | PCP013011   | XM_009365208 |              |              |
| PCP013217 | 1,584962501 | 2,22342255  | 3,321928095 | 6,007419784 | PCP013217   | XM_021950325 |              |              |
| PCP013272 | 3,969933275 | 2,503348735 | 5,058749412 | 3,874796966 | PCP013272   | XM_009366106 |              |              |
| PCP013292 | 3,772941338 | 4,437627248 | 4,087462841 | 5,380937195 | PCP013292   | XM_017328562 |              |              |
| PCP013454 | 3,584962501 | 3,969933275 | 4,874305166 | 5,014801602 | PCP013454   | XM_009354890 |              |              |
| PCP013523 | 3,221877081 | 4,115199749 | 4,196134881 | 6,156437068 |             |              |              |              |
| PCP013599 | 4,890933022 | 4,222650022 | 3,116031993 | 5,014801602 |             |              |              |              |
| PCP013608 | 2,6622055   | 4,564987801 | 3,116031993 | 4,700439718 |             |              |              |              |
| PCP013709 | 3,321928095 | 3,321928095 | 5,247927513 | 3,27351589  | PCP013709   | XM_009371149 |              |              |
| PCP013957 | 1,416839742 | 2,584962501 | 2,737686761 | 4,938756261 | PCP013957   | XM_009338476 |              |              |
| PCP013988 | 2,807354922 |             | 2           | 5,156639311 | 3,624100895 | PCP013988    | XM_008383931 |              |
| PCP014592 | 2,584962501 | 3,368768349 | 4,029452886 | 4,857980995 |             |              |              |              |
| PCP014599 | 3,700439718 | 2,807354922 | 5,977279923 | 4,222650022 | PCP014599   | XM_009366067 |              |              |
| PCP014817 | 3,969933275 | 3,663344619 | 3,368768349 | 5,196528361 |             |              |              |              |
| PCP014930 | 2,114367025 | 3,502075956 | 3,736604875 | 4,604664415 | PCP014930   | XM_009380720 |              |              |
| PCP015259 | 2,6622055   | 1,735522177 | 3,840966704 | 5,763677142 |             |              |              |              |
| PCP015521 | 3,116031993 | 4,321928095 | 4,890933022 | 5,297558281 | PCP015521   | XM_009356385 |              |              |
| PCP015887 | 3,415488271 | 4,459431619 | 5,392317423 | 3,969933275 | PCP015887   | XM_009352937 |              |              |
| PCP015995 | 1,584962501 |             | 0           | 3,663344619 | 5,333781501 | PCP015995    | XM_009347735 |              |
| PCP016800 | 2,321928095 | 3,116031993 | 4,414812061 | 2,807354922 | PCP016800   | XM_008372503 |              |              |
| PCP017407 | 2,414135533 | 2,22342255  | 4,34553831  | 2,6622055   | PCP017407   | XM_008383931 |              |              |
| PCP017678 | 3,807354922 | 4,321928095 | 4,480911346 | 5,247927513 |             |              |              |              |
| PCP017796 | 2,114367025 | 4,480911346 | 5,156639311 | 5,984817174 | PCP017796   | XM_009371480 |              |              |
| PCP017800 | 1,875780063 | 2,807354922 | 4,222650022 | 6,044394119 | PCP017800   | XM_009371483 |              |              |
| PCP017982 | 3,321928095 | 3,906890596 | 4,682011391 | 5,718909554 | PCP017982   | XM_018651555 |              |              |
| PCP018510 | 3,169925001 | 2,807354922 | 5,824513297 | 4,297925053 | PCP018510   | XM_009352865 |              |              |
| PCP018540 |             | 3           | 3,772941338 | 4,718635616 | 5,554588852 | PCP018540    | XM_009344489 |              |
| PCP018561 | 2,321928095 | 3,321928095 | 5,101397952 | 4,115199749 |             |              |              |              |
| PCP018744 | 2,114367025 | 3,584962501 | 4,624685811 | 3,700439718 |             |              |              |              |
| PCP018749 | 2,22342255  | 2,321928095 | 3,221877081 | 4,584962501 | PCP018749   | XM_009343842 |              |              |
| PCP019266 | 2,321928095 | 3,116031993 | 3,27351589  | 6,409390936 | PCP019266   | XM_009355069 |              |              |
| PCP019275 |             | 3           | 3,058316496 |             | 2           | 5,502394256  | PCP019275    | XM_009355036 |

|           |              |             |             |             |           |              |
|-----------|--------------|-------------|-------------|-------------|-----------|--------------|
| PCP019864 | 2,321928095  | 4,369466484 | 2,114367025 | 3,415488271 | PCP019864 | XM_018652357 |
| PCP019999 | 3,807354922  | 3,321928095 | 4,922673593 | 3,736604875 | PCP019999 | XM_009363999 |
| PCP020123 | 0,411426246  | 3,058316496 | 5,415150205 | 5,57500972  | PCP020123 | XM_009348097 |
| PCP020139 | 1,875780063  | 4,087462841 | 4,772413555 | 5,718909554 |           |              |
| PCP020142 | 3,840966704  | 3,938285792 | 5,491853096 | 4,459431619 | PCP020142 | XM_009343633 |
| PCP020206 | 1,416839742  | 2,22342255  | 4,502712486 | 3,368768349 | PCP020206 | XM_009338173 |
| PCP020243 | 2,807354922  | 3,584962501 | 4,584962501 | 3,874796966 | PCP020243 | XM_017325241 |
| PCP020366 | 3,368768349  | 4,115199749 | 4,544114402 | 4,938756261 |           |              |
| PCP020899 | 4,222650022  | 4,196134881 | 3,169925001 | 4,790250739 | PCP020899 | XM_009375425 |
| PCP021132 | 2,503348735  | 3,700439718 | 4,64385619  | 4,34553831  | PCP021132 | XM_017322719 |
| PCP021133 | 2,503348735  | 3,221877081 | 4,790250739 | 3,969933275 | PCP021133 | XM_018649040 |
| PCP021204 | 3,116031993  | 4           | 3,772941338 | 5,115615931 | PCP021204 | XM_008389068 |
| PCP021373 | 3,116031993  | 2,737686761 | 4,115199749 | 5,459431619 | PCP021373 | XM_009380371 |
| PCP021941 | 3,938285792  | 4,059182199 | 3,663344619 | 5,437294331 |           |              |
| PCP021980 | 0            | 2,114367025 | 3,874796966 | 7,318949464 | PCP021980 | XM_009335711 |
| PCP022338 | 3,116031993  | 4,222650022 | 4,272769732 | 4,874305166 | PCP022338 | XM_017330400 |
| PCP022732 | 1            | 3,584962501 | 3,116031993 | 4,059182199 | PCP022732 | XM_009380534 |
| PCP022907 | 2,939226578  | 3,874796966 | 4,824258697 | 4,196134881 | PCP022907 | XM_008375897 |
| PCP022961 | -0,577766999 | 5,672425342 | 4,196134881 | 5,02989455  | PCP022961 | XM_009367896 |
| PCP023118 | 3,116031993  | 2,807354922 | 5,073391816 | 4,321928095 | PCP023118 | XM_008372483 |
| PCP023224 | 3,584962501  | 4,624685811 | 4,321928095 | 5,502394256 | PCP023224 | XM_009373380 |
| PCP023407 | 4,169925001  | 2,114367025 | 4,662775172 | 5,142821844 |           |              |
| PCP023849 | 3,938285792  | 3,736604875 | 4,604664415 | 5,222263604 | PCP023849 | XR_531212    |
| PCP024009 | 3,663344619  | 4,029452886 | 5,058749412 | 5,014801602 |           |              |
| PCP024056 | 2,503348735  | 2,873813198 | 4,272769732 | 5,273142859 | PCP024056 | XM_009348478 |
| PCP024321 | 1,735522177  | 4,143230135 | 4,922673593 | 4,196134881 | PCP024321 | XM_009374827 |
| PCP024534 | 2,939226578  | 2,503348735 | 2,321928095 | 5,502394256 | PCP024534 | XM_009343430 |
| PCP024738 | 1,416839742  | 3,169925001 | 4,115199749 | 4,564987801 |           |              |
| PCP024752 | 2,584962501  | 1,584962501 | 3,368768349 | 5,285402219 | PCP024752 | XM_009375419 |
| PCP024774 | 2,807354922  | 3,116031993 | 4,143230135 | 4,624685811 | PCP024774 | XM_009369812 |
| PCP024942 | 2,584962501  | 2,939226578 | 5,02989455  | 3,624100895 | PCP024942 | XM_009349097 |
| PCP024943 | 2,873813198  | 2,807354922 | 4,857980995 | 3,321928095 | PCP024943 | XM_009349095 |
| PCP024945 | 2,321928095  | 2,414135533 | 5,470211457 | 3,27351589  | PCP024945 | XM_008352951 |
| PCP025134 | 2,737686761  | 2,503348735 | 2,939226578 | 4,523561956 | PCP025134 | XM_009362332 |
| PCP025158 | 2            | 3,368768349 | 4,169925001 | 2,6622055   | PCP025158 | XM_008369512 |
| PCP025264 | 2,6622055    | 3,736604875 | 3,906890596 | 5,273142859 | PCP025264 | XM_018644489 |
| PCP026217 | 1,220329955  | 3,116031993 | 3,584962501 | 4,196134881 | PCP026217 | XM_009347778 |
| PCP026446 | 3,058316496  | 4,059182199 | 4,890933022 | 4,437627248 |           |              |
| PCP026854 | 2,414135533  | 4,247927513 | 4,64385619  | 4,437627248 | PCP026854 | XM_009374304 |
| PCP026877 | 2,939226578  | 2,321928095 | 3,221877081 | 4,874305166 | PCP026877 | XM_009376764 |
| PCP026892 | 3,459431619  | 2,503348735 | 3,321928095 | 4,459431619 | PCP026892 | XM_009378588 |
| PCP027343 | 2,6622055    | 3,906890596 | 3,807354922 | 4,718635616 | PCP027343 | XM_009373108 |
| PCP027666 | 2,939226578  | 4,272769732 | 5,044394119 | 4,369466484 | PCP027666 | XM_009367401 |
| PCP027716 | 3,221877081  | 3,663344619 | 3,874796966 | 5,101397952 | PCP027716 | XM_008368760 |
| PCP027939 | 3,368768349  | 3,584962501 | 4,584962501 | 4,874305166 |           |              |
| PCP028137 | 2,6622055    | 3,368768349 | 4,437627248 | 4,682011391 | PCP028137 | XM_009370322 |

|           |             |             |             |             |           |              |
|-----------|-------------|-------------|-------------|-------------|-----------|--------------|
| PCP028317 | 1,584962501 | 3,906890596 | 2,873813198 | 5,321928095 | PCP028317 | XM_009344423 |
| PCP028728 | 3,459431619 | 2,6622055   | 2,414135533 | 4,790250739 | PCP028728 | XM_009358742 |
| PCP028767 | 2,414135533 | 3,874796966 | 4,414812061 | 3,700439718 | PCP028767 | XM_009341956 |
| PCP028989 | 1,735522177 | 4,143230135 | 4,115199749 | 3,663344619 | PCP028989 | XM_008384160 |
| PCP029287 | 4           | 4,087462841 | 4,564987801 | 5,273142859 | PCP029287 | XM_008394855 |
| PCP029298 | 3,624100895 | 3,321928095 | 2,807354922 | 8,051643995 | PCP029298 | XM_018650273 |
| PCP029645 | 4,059182199 | 3           | 3,874796966 | 4,718635616 |           |              |
| PCP029869 | 5,260402093 | 2,584962501 | 3,584962501 | 5,663059924 |           |              |
| PCP029980 | 4,272769732 | 3,459431619 | 4,369466484 | 4,985044962 | PCP029980 | XM_008366172 |
| PCP030701 | 2,807354922 | 4,718635616 | 5,02989455  | 4,584962501 | PCP030701 | XM_009351604 |
| PCP030958 | 1,584962501 | 3,27351589  | 4,272769732 | 5,129283017 | PCP030958 | XM_009342312 |
| PCP031375 | 2,939226578 | 1,416839742 | 4,222650022 | 5,073391816 | PCP031375 | XM_009360326 |
| PCP032234 | 0           | 4,604664415 | 5,169925001 | 6,845490051 |           |              |
| PCP032270 | 2,414135533 | 3,169925001 | 1,735522177 | 4,115199749 |           |              |
| PCP032639 | 4,059182199 | 3,27351589  | 4,369466484 | 6,051589621 | PCP032639 | XM_009341259 |
| PCP032640 | 3,321928095 | 2,22342255  | 3,938285792 | 5,544423562 | PCP032640 | XM_009341259 |
| PCP032814 | 2,321928095 | 1           | 3,459431619 | 6,454011343 | PCP032814 | XM_008394273 |
| PCP032838 | 2,737686761 | 3,27351589  | 4,321928095 | 5,115615931 | PCP032838 | XM_009380631 |
| PCP033182 | 4,392317423 | 2,737686761 | 4,624685811 | 3,772941338 |           |              |
| PCP033518 | 4,143230135 | 0           | 4,624685811 | 4,272769732 | PCP033518 | XM_016579852 |
| PCP033580 | 3           | 2,584962501 | 2,807354922 | 4,772413555 | PCP033580 | XM_009346207 |
| PCP034194 | 1,584962501 | 3,116031993 | 3,544732656 | 4,502712486 | PCP034194 | XM_009366772 |
| PCP034195 | 0           | 0           | 5,523561956 | 6,902917719 |           |              |
| PCP034698 | 3,221877081 | 4,169925001 | 4,321928095 | 4,807354922 |           |              |
| PCP034913 | 3,624100895 | 4,087462841 | 4,369466484 | 5,142821844 |           |              |
| PCP035441 | 3,624100895 | 3,663344619 | 1,220329955 | 4,544114402 | PCP035441 | XM_008364817 |
| PCP035902 | 4,544114402 | 0           | 6,327866971 | 6,403778984 | PCP035902 | XM_009344288 |
| PCP035945 | 3,938285792 | 4,969472865 | 1,416839742 | 6,06608919  | PCP035945 | XM_008374830 |
| PCP037904 | 2,737686761 | 2,807354922 | 2,114367025 | 4,564987801 | PCP037904 | XM_021954335 |
| PCP038828 | 3,058316496 | 4,059182199 | 1,735522177 | 5,874551087 |           |              |
| PCP038955 | 2,503348735 | 4,480911346 | 3,544732656 | 3,459431619 | PCP038955 | XM_009376559 |
| PCP039193 | 5,513174885 | 2,22342255  | 4,247927513 | 4,824258697 |           |              |
| PCP039365 | 2,807354922 | 2,873813198 | 3,321928095 | 4,662775172 | PCP039365 | XM_008352466 |
| PCP039627 | 0           | 0           | 4,624685811 | 8,08390476  | PCP039627 | XM_008364037 |
| PCP040205 | 3,624100895 | 4,34553831  | 3,772941338 | 5,073391816 |           |              |
| PCP040481 | 4,321928095 | 3,415488271 | 4,523561956 | 5,142821844 | PCP040481 | XM_009359279 |
| PCP040756 | 4,196134881 | 4,115199749 | 4,143230135 | 5,513174885 | PCP040756 | XM_009343151 |
| PCP041063 | 5,209453366 | 1           | 5,544423562 | 5,101397952 | PCP041063 | XM_008246811 |
| PCP041331 | 3,221877081 | 1,220329955 | 2,321928095 | 4,624685811 | PCP041331 | XM_009360481 |
| PCP041369 | 3,624100895 | 3,221877081 | 3,969933275 | 5,087462841 |           |              |
| PCP042455 | 4,414812061 | 0           | 4,662775172 | 4,624685811 |           |              |
| PCP042653 | 4,029452886 | 2,584962501 | 3,700439718 | 5,044394119 | PCP042653 | XM_008358578 |
| PCP042749 | 2,22342255  | 3,116031993 | 4,414812061 | 5,101397952 | PCP042749 | XM_008341460 |
| PCP043142 | 0           | 5,247927513 | 0           | 6,914923239 |           |              |
| PCP043740 | 4,222650022 | 0           | 3,27351589  | 4,807354922 |           |              |
| PCP043951 | 2,939226578 | 3,906890596 | 3,807354922 | 4,824258697 | PCP043951 | XM_009372575 |

|           |             |             |             |             |           |              |
|-----------|-------------|-------------|-------------|-------------|-----------|--------------|
| PCP044057 | 3,840966704 | 3,321928095 | 5,014801602 | 5,59484709  | PCP044057 | XM_009357750 |
| PCP044299 | 3,27351589  | 0,411426246 | 4,143230135 | 3,874796966 |           |              |
| PCP044405 | 1,735522177 | 3,772941338 | 3,321928095 | 4,196134881 | PCP044405 | XM_008393352 |
| PCP044889 | 2,737686761 | 2,737686761 | 3,624100895 | 5,832890014 | PCP044889 | XM_009361567 |

*Cluster 10*

| Gene      | H1           | H2          | H3           | H4          |              |                                    |
|-----------|--------------|-------------|--------------|-------------|--------------|------------------------------------|
| PCP001825 | 2,321928095  | 2,873813198 | 0,411426246  |             | 0            | PCP001825 XM_009338347             |
| PCP005893 |              | 0           | 3,736604875  | 1           | 0,411426246  | PCP005893 XM_009349811             |
| PCP005924 |              | 0           | 2,807354922  | 0           | 0            | PCP005924 XM_008347889             |
| PCP006202 |              | 0           | 4,414812061  | 0           | 0            | PCP006202 XM_009351630             |
| PCP006730 |              | 0           | 5,014801602  | 1,416839742 | -0,577766999 | PCP006730 XM_009345156             |
| PCP010806 |              | 0           | 3,906890596  | 0,411426246 | 0            | PCP010806 XM_009342604             |
| PCP011019 |              | 1           | 2,321928095  | 1,220329955 | 0            | PCP011019 XM_009352216             |
| PCP011690 |              | 0           | 3,221877081  | 0           | 0,411426246  | PCP011690 XM_009356910             |
| PCP011882 |              | 0           | 3,874796966  | 0           | 0,739848103  | PCP011882 XM_009347412             |
| PCP013201 |              | 0           | 3,874796966  | 0           | 0,739848103  | PCP013201 XM_009370905             |
| PCP015040 | -0,577766999 | 3,459431619 | 0,411426246  |             | 0            |                                    |
| PCP015143 |              | 0           | 3,058316496  | 1           | 0            | PCP015143 XM_009379477             |
| PCP015306 |              | 0           | 6,658211483  | 0           | 2,414135533  |                                    |
| PCP016257 |              | 0           | 3,116031993  | 0           | 0            | PCP016257 XM_009371251             |
| PCP016788 | 1,220329955  | 2,414135533 | -0,577766999 |             | 0            | PCP016788 XM_009366208             |
| PCP017511 | 1,220329955  | 4,222650022 | 1,416839742  | 0,411426246 |              | PCP017511 XM_009340251             |
| PCP017826 |              | 0           | 2,584962501  | 0,411426246 | 0            | PCP017826 XM_009354003             |
| PCP018932 |              | 0           | 2,6622055    | 0           | 0            | PCP018932 XM_008350168             |
| PCP020121 | 0,411426246  | 2,873813198 |              | 0           | 0            | PCP020121 XM_009375926             |
| PCP020550 | 0,411426246  | 4,73714592  |              | 0           | 1            | PCP020550 XM_008374582             |
| PCP020997 | 1,584962501  | 2,321928095 | 1,584962501  |             | 0            | PCP020997 XM_009375941             |
| PCP021243 |              | 1           | 2,807354922  | 0,411426246 | 0            | PCP021243 XM_009353888             |
| PCP021374 |              | 0           | 5,014801602  |             | 0            | 1,220329955 PCP021374 XM_009380370 |
| PCP021767 |              | 0           | 3,221877081  | 0,411426246 | 0            | PCP021767 XM_009340631             |
| PCP021974 |              | 0           | 4            | 0           | 0            | PCP021974 XM_009377686             |
| PCP022084 |              | 0           | 3,116031993  | 0           | 0            | PCP022084 XM_009361441             |
| PCP023655 | 3,368768349  | 3,874796966 |              | 0           | 2,873813198  |                                    |
| PCP024030 |              | 0           | 2,807354922  | 0           | 0            |                                    |
| PCP024062 | 2,414135533  | 2,873813198 | 1,416839742  |             | 0            | PCP024062 XM_009366234             |
| PCP025154 |              | 0           | 3,840966704  | 0           | 0            | PCP025154 XM_009350115             |
| PCP027297 | 1,735522177  | 3,058316496 |              | 0           | 2,22342255   | PCP027297 XM_009350750             |
| PCP028399 | 1,584962501  | 2,503348735 |              | 1           | 0            | PCP028399 XM_018650869             |
| PCP029986 |              | 0           | 3,700439718  | 1           | 0            | PCP029986 XM_018651526             |
| PCP031851 | 2,414135533  |             | 4            | 0           | 0            | PCP031851 XM_009378007             |
| PCP032530 |              | 0           | 4,222650022  | 0           | 0            | PCP032530 XM_009350265             |
| PCP035390 |              | 0           | 3,321928095  | 1,416839742 | 0            |                                    |
| PCP036241 | 2,503348735  | 3,058316496 | 1,220329955  |             | 0            |                                    |
| PCP036639 | 2,114367025  | 2,6622055   |              | 0           | 0            | PCP036639 XM_009362572             |
| PCP038280 |              | 0           | 4,196134881  | 0           | -0,577766999 | PCP038280 XM_009358284             |



|           |             |             |             |              |           |              |
|-----------|-------------|-------------|-------------|--------------|-----------|--------------|
| PCP041536 | 0           | 3,368768349 | 0           | 0            | PCP041536 | XM_009351564 |
| PCP042492 | 0           | 7,342785837 | 0           | 0            |           |              |
| PCP043449 | 2,737686761 | 3,415488271 | 0           | 2,321928095  | PCP043449 | XM_008347718 |
| PCP043837 | 1,875780063 | 2,503348735 | 1           | 0            |           |              |
| PCP043943 | 1,416839742 | 2,503348735 | 0,739848103 | 0            | PCP043943 | XM_018648322 |
| PCP044004 | 0           | 4,437627248 | 0,411426246 | -0,577766999 | PCP044004 | XM_009358284 |

*Cluster 11*

| <b>Gene</b> | <b>H1</b>   | <b>H2</b>    | <b>H3</b>    | <b>H4</b>    |           |              |
|-------------|-------------|--------------|--------------|--------------|-----------|--------------|
| PCP000233   | 3,058316496 | 3,058316496  | 0            | -0,577766999 | PCP000233 | XM_009339674 |
| PCP000802   | 2,737686761 | 1,220329955  | 0            | 1,584962501  | PCP000802 | XM_009350098 |
| PCP001828   | 2,321928095 | 1            | 1            | 0            | PCP001828 | XM_009357917 |
| PCP001874   | 2,6622055   | 0            | -0,577766999 | 0            | PCP001874 | XM_018648374 |
| PCP002798   | 2,414135533 | 1,875780063  | 1,584962501  | 0            |           |              |
| PCP003409   | 3,058316496 | 1            | 0            | 0            | PCP003409 | XM_008361518 |
| PCP004002   | 2,321928095 | 0,411426246  | 0            | 0            | PCP004002 | XM_009371072 |
| PCP004198   | 3,415488271 | 2,321928095  | 0            | 0            | PCP004198 | XM_009379603 |
| PCP004389   | 2,584962501 | 2,6622055    | 0            | 0            | PCP004389 | XM_009366369 |
| PCP004984   | 4,115199749 | 0            | 0            | 0            | PCP004984 | XM_009363422 |
| PCP006961   | 3,368768349 | 2,321928095  | 0            | 0            | PCP006961 | XM_009367373 |
| PCP007325   | 3,221877081 | 2,873813198  | 0            | 0            | PCP007325 | XM_009374614 |
| PCP007895   | 2,807354922 | 0            | 0            | 0            | PCP007895 | XM_017328151 |
| PCP008572   | 3,221877081 | 2,737686761  | 0            | 0            | PCP008572 | XM_018648106 |
| PCP008982   | 2,873813198 | 2            | 0            | 1,875780063  |           |              |
| PCP010099   | 2,503348735 | 0            | 0            | 0            | PCP010099 | XM_009342481 |
| PCP011594   | 2,737686761 | 0            | 0,411426246  | 0            | PCP011594 | XM_009380053 |
| PCP013620   | 3,321928095 | 0            | 1,416839742  | 0            | PCP013620 | XM_018649895 |
| PCP013746   | 4,059182199 | -0,577766999 | 1,584962501  | 0,739848103  |           |              |
| PCP013827   | 3,116031993 | -0,577766999 | 0            | 0            | PCP013827 | XM_009340679 |
| PCP014251   | 2,321928095 | 1,220329955  | 0,411426246  | 0            | PCP014251 | XM_008384375 |
| PCP014303   | 2,807354922 | 1,220329955  | 1,416839742  | 0            |           |              |
| PCP014856   | 2,321928095 | 2,584962501  | 0,411426246  | 0            |           |              |
| PCP015675   | 2,6622055   | 0            | 1            | 0            | PCP015675 | XM_009335996 |
| PCP015899   | 2,873813198 | 0            | 0            | 0            | PCP015899 | XR_666287    |
| PCP016390   | 2,939226578 | 2,414135533  | 1,220329955  | 0            | PCP016390 | XM_009362917 |
| PCP016448   | 2,6622055   | 0            | 0            | 0            |           |              |
| PCP019349   | 2,503348735 | 0            | 0,411426246  | 0            |           |              |
| PCP019707   | 3,221877081 | 2,22342255   | 0            | 0,411426246  | PCP019707 | XM_008378316 |
| PCP022974   | 2,503348735 | 0            | 0            | 0            | PCP022974 | XM_009378694 |
| PCP023084   | 3,169925001 | 1,584962501  | 1,584962501  | 0            | PCP023084 | XM_002950787 |
| PCP023233   | 3,27351589  | 2,939226578  | 0            | 0            | PCP023233 | XM_009373397 |
| PCP023585   | 2,737686761 | 0            | 1,875780063  | 0            | PCP023585 | XM_008394216 |
| PCP023608   | 2,6622055   | 1            | 0            | 1,416839742  | PCP023608 | XM_009350982 |
| PCP023830   | 2,584962501 | 0            | 0            | 0            |           |              |
| PCP024143   | 2,503348735 | 0,411426246  | 0,411426246  | 0            | PCP024143 | XM_009368887 |
| PCP024364   | 2,414135533 | 2            | 0            | 0            | PCP024364 | XM_008360397 |

|           |             |              |              |             |           |              |
|-----------|-------------|--------------|--------------|-------------|-----------|--------------|
| PCP024510 | 2,414135533 | 1,220329955  | 0            | 0           | PCP024510 | XM_009367270 |
| PCP024678 | 3           | 1,584962501  | 1            | 0           | PCP024678 | XM_008367739 |
| PCP024932 | 3,058316496 | 2,321928095  | 0            | 0           | PCP024932 | XM_009371690 |
| PCP025006 | 3           | 0            | 0            | 0           | PCP025006 | XM_017330311 |
| PCP025204 | 2,584962501 | 1            | -0,577766999 | 0           | PCP025204 | XM_009367164 |
| PCP025815 | 3,058316496 | 0,411426246  | 1,584962501  | 0           | PCP025815 | XM_009336888 |
| PCP026440 | 2,807354922 | 2,114367025  | 0            | 0           | PCP026440 | XM_008352001 |
| PCP026694 | 2,321928095 | 1,416839742  | 0,411426246  | 0           |           |              |
| PCP027388 | 2,807354922 | 0            | 0            | 0           | PCP027388 | XM_009339945 |
| PCP028363 | 2,6622055   | 0,411426246  | 0            | 0           |           |              |
| PCP028698 | 2,807354922 | 1,416839742  | 1            | 0           | PCP028698 | XM_009357769 |
| PCP028788 | 2,503348735 | 1,220329955  | 0,739848103  | 0           | PCP028788 | XM_009345155 |
| PCP029316 | 3           | 0,739848103  | 1            | 0           | PCP029316 | XM_009352704 |
| PCP030505 | 2,737686761 | 1,220329955  | 0,411426246  | 0           | PCP030505 | XM_008391395 |
| PCP030616 | 2,503348735 | 2,114367025  | 0            | 0           |           |              |
| PCP030738 | 3,938285792 | 2,873813198  | 0            | 0,411426246 | PCP030738 | XM_009353340 |
| PCP030831 | 2,939226578 | 0,739848103  | 1,875780063  | 0           | PCP030831 | XM_008386562 |
| PCP031530 | 2,6622055   | 2,22342255   | 0,739848103  | 0           | PCP031530 | XM_009350056 |
| PCP032513 | 2,584962501 | 2,22342255   | 0,411426246  | 0           | PCP032513 | XM_009366829 |
| PCP033098 | 3,321928095 | 1            | 0            | 1,416839742 | PCP033098 | XM_008368127 |
| PCP033768 | 2,22342255  | 2,414135533  | 0            | 0           | PCP033768 | XM_017333249 |
| PCP035279 | 4,297925053 | 1,735522177  | 0            | 0           | PCP035279 | XM_009371464 |
| PCP039037 | 2,414135533 | 0,411426246  | 2,414135533  | 0           |           |              |
| PCP040594 | 3,624100895 | 3,058316496  | 0            | 0,411426246 |           |              |
| PCP041149 | 3,058316496 | 0,739848103  | 0,739848103  | 0           |           |              |
| PCP042542 | 2,873813198 | -0,577766999 | 0            | 0           | PCP042542 | XM_009354107 |
| PCP042566 | 2,503348735 | 2,503348735  | 0            | 0           |           |              |
| PCP042671 | 2,873813198 | 2,503348735  | 0,411426246  | 0           |           |              |
| PCP043251 | 3,807354922 | 1,735522177  | 0            | 2           | PCP043251 | XM_018646971 |
| PCP044447 | 3           | 2,22342255   | 0            | 0           | PCP044447 | XM_009348171 |
| PCP045100 | 3,544732656 | -0,577766999 | 0,739848103  | 0,411426246 | PCP045100 | XM_008394039 |

Average

| cluster | H1          | H2          | H3          | H4          |
|---------|-------------|-------------|-------------|-------------|
| cl_1    | 5,880715017 | 5,857427279 | 5,972417687 | 5,955666718 |
| cl_2    | 0,13141695  | 0,19184928  | 0,842662862 | 4,233484062 |
| cl_3    | 0,42965634  | 2,902193757 | 1,749434837 | 3,494579744 |
| cl_4    | 0,939010736 | 0,62706897  | 3,596867671 | 2,695973288 |
| cl_5    | 9,97323514  | 9,969444416 | 10,07146689 | 10,26117955 |
| cl_6    | 7,757726986 | 7,769941228 | 7,889533429 | 8,050892473 |
| cl_7    | 3,165817735 | 3,000319343 | 2,361399789 | 0,382418301 |
| cl_8    | 4,540403499 | 4,168089575 | 3,734976483 | 2,788392192 |
| cl_9    | 2,829940897 | 3,183906649 | 4,112230991 | 4,899243804 |
| cl_10   | 0,683515165 | 3,555738072 | 0,394112138 | 0,289651184 |
| cl_11   | 2,897337318 | 1,211022558 | 0,398033084 | 0,148561884 |

Supplementary Table S3

| <b>N.</b> | <b>%</b>    | <b>Cellular_component</b>                      |
|-----------|-------------|------------------------------------------------|
| 601       | 40,69058903 | integral component of membrane                 |
| 220       | 14,89505755 | nucleus                                        |
| 73        | 4,942450914 | intracellular membrane-bounded organelle       |
| 69        | 4,671631686 | ribosome                                       |
| 64        | 4,333107651 | mitochondria                                   |
| 57        | 3,859174001 | plasma membrane                                |
| 43        | 2,911306703 | membrane                                       |
| 41        | 2,775897089 | chloroplast                                    |
| 27        | 1,82802979  | cytoplasm                                      |
| 18        | 1,218686527 | plasmodesma                                    |
| 16        | 1,083276913 | cytosol                                        |
| 15        | 1,015572106 | extracellular                                  |
| 15        | 1,015572106 | photosystem                                    |
| 12        | 0,812457684 | cell                                           |
| 12        | 0,812457684 | microtubule                                    |
| 11        | 0,744752877 | nucleolus                                      |
| 11        | 0,744752877 | trans-Golgi network                            |
| 11        | 0,744752877 | vacuole                                        |
| 9         | 0,609343263 | protein phosphatase type 2A complex            |
| 8         | 0,541638456 | cell wall                                      |
| 8         | 0,541638456 | plastoglobule                                  |
| 7         | 0,473933649 | Golgi                                          |
| 7         | 0,473933649 | viral nucleocapsid                             |
| 6         | 0,406228842 | large ribosomal subunit                        |
| 6         | 0,406228842 | SCF ubiquitin ligase complex                   |
| 5         | 0,338524035 | endoplasmic reticulum                          |
| 5         | 0,338524035 | proton-transporting                            |
| 5         | 0,338524035 | transcriptional repressor complex              |
| 4         | 0,270819228 | Cul3-RING ubiquitin ligase complex             |
| 4         | 0,270819228 | proteasome regulatory particle, lid subcomplex |
| 4         | 0,270819228 | small ribosomal subunit                        |
| 4         | 0,270819228 | stromule                                       |
| 3         | 0,203114421 | clathrin-coated vesicle                        |
| 3         | 0,203114421 | cytoskeleton                                   |
| 3         | 0,203114421 | nascent polypeptide-associated complex         |
| 3         | 0,203114421 | respiratory chain                              |
| 3         | 0,203114421 | TORC1 complex                                  |
| 2         | 0,135409614 | 90S preribosome                                |
| 2         | 0,135409614 | anchored component of plasma membrane          |
| 2         | 0,135409614 | exocyst                                        |
| 2         | 0,135409614 | glycerol-3-phosphate dehydrogenase complex     |
| 2         | 0,135409614 | isoamylase complex                             |
| 2         | 0,135409614 | nuclear pore                                   |
| 2         | 0,135409614 | P-body                                         |

|   |             |                                                    |
|---|-------------|----------------------------------------------------|
| 2 | 0,135409614 | plant-type vacuole membrane                        |
| 2 | 0,135409614 | plastid                                            |
| 2 | 0,135409614 | plastid nucleoid                                   |
| 2 | 0,135409614 | signal peptidase complex                           |
| 2 | 0,135409614 | signal recognition particle receptor complex       |
| 2 | 0,135409614 | small-subunit processome                           |
| 2 | 0,135409614 | spliceosomal complex                               |
| 2 | 0,135409614 | TAT protein transport complex                      |
| 2 | 0,135409614 | TRAPP complex                                      |
| 2 | 0,135409614 | U5 snRNP                                           |
| 2 | 0,135409614 | ubiquitin ligase complex                           |
| 1 | 0,067704807 | AP-3 adaptor complex                               |
| 1 | 0,067704807 | apoplast                                           |
| 1 | 0,067704807 | cohesin complex                                    |
| 1 | 0,067704807 | COP9 signalosome                                   |
| 1 | 0,067704807 | COPII vesicle coat                                 |
| 1 | 0,067704807 | dynein complex                                     |
| 1 | 0,067704807 | ESCRT I complex                                    |
| 1 | 0,067704807 | eukaryotic translation initiation factor 3 complex |
| 1 | 0,067704807 | FACT complex                                       |
| 1 | 0,067704807 | histone acetyltransferase complex                  |
| 1 | 0,067704807 | Ino80 complex                                      |
| 1 | 0,067704807 | mediator complex                                   |
| 1 | 0,067704807 | molybdopterin synthase complex                     |
| 1 | 0,067704807 | monolayer-surrounded lipid storage body            |
| 1 | 0,067704807 | NatA complex                                       |
| 1 | 0,067704807 | Ndc80 complex                                      |
| 1 | 0,067704807 | nuclear chromosome, telomeric region               |
| 1 | 0,067704807 | nuclear telomere cap complex                       |
| 1 | 0,067704807 | nucleosome                                         |
| 1 | 0,067704807 | peroxisomal membrane                               |
| 1 | 0,067704807 | peroxisome                                         |
| 1 | 0,067704807 | plastid chromosome                                 |
| 1 | 0,067704807 | pollen tube                                        |
| 1 | 0,067704807 | retromer complex                                   |
| 1 | 0,067704807 | RISC complex                                       |
| 1 | 0,067704807 | SNARE complex                                      |
| 1 | 0,067704807 | synaptonemal complex                               |
| 1 | 0,067704807 | thylakoid lumen                                    |

| <b>N.</b> | <b>%</b>    | <b>Biological_Process</b>    |
|-----------|-------------|------------------------------|
| 104       | 8,724832215 | transcription, DNA-templated |
| 74        | 6,208053691 | translation                  |
| 51        | 4,27852349  | metabolic process            |
| 46        | 3,859060403 | signal transduction          |

|    |             |                                                                                          |
|----|-------------|------------------------------------------------------------------------------------------|
| 31 | 2,600671141 | regulation of transcription<br>proteasome-mediated ubiquitin-dependent protein catabolic |
| 28 | 2,348993289 | process                                                                                  |
| 24 | 2,013422819 | defense response                                                                         |
| 22 | 1,845637584 | RNA modification                                                                         |
| 22 | 1,845637584 | transmembrane transport                                                                  |
| 20 | 1,677852349 | response to biotic stimulus                                                              |
| 19 | 1,593959732 | carbohydrate metabolic process and transport                                             |
| 19 | 1,593959732 | protein ubiquitination                                                                   |
| 17 | 1,426174497 | lipid metabolism                                                                         |
| 17 | 1,426174497 | protein phosphorylation                                                                  |
| 17 | 1,426174497 | response to auxin                                                                        |
| 15 | 1,258389262 | photosynthesis                                                                           |
| 14 | 1,174496644 | response to light                                                                        |
| 13 | 1,090604027 | microtubule-based process                                                                |
| 13 | 1,090604027 | response to oxidative stress                                                             |
| 11 | 0,922818792 | glycolytic process                                                                       |
| 11 | 0,922818792 | protein glycosylation                                                                    |
| 10 | 0,838926174 | intracellular transport and signalling                                                   |
| 10 | 0,838926174 | vesicle-mediated transport                                                               |
| 9  | 0,755033557 | cell redox homeostasis                                                                   |
| 9  | 0,755033557 | fatty acid metabolism                                                                    |
| 9  | 0,755033557 | glycerol metabolic process                                                               |
| 9  | 0,755033557 | metal ion transport                                                                      |
| 9  | 0,755033557 | plant-type cell wall organization                                                        |
| 9  | 0,755033557 | protein transport                                                                        |
| 8  | 0,67114094  | cell wall modification and organization                                                  |
| 8  | 0,67114094  | proteolysis                                                                              |
| 8  | 0,67114094  | response to water                                                                        |
| 8  | 0,67114094  | secondary metabolite biosynthetic process                                                |
| 7  | 0,587248322 | negative regulation of translation                                                       |
| 7  | 0,587248322 | protein folding                                                                          |
| 7  | 0,587248322 | proton transport                                                                         |
| 7  | 0,587248322 | recognition of pollen                                                                    |
| 7  | 0,587248322 | response to stress                                                                       |
| 6  | 0,503355705 | biosynthetic process                                                                     |
| 6  | 0,503355705 | iron-sulfur cluster assembly                                                             |
| 6  | 0,503355705 | maturation of LSU-rRNA                                                                   |
| 6  | 0,503355705 | oxidation-reduction process                                                              |
| 6  | 0,503355705 | S-adenosylmethionine biosynthetic process                                                |
| 6  | 0,503355705 | tricarboxylic acid cycle                                                                 |
| 5  | 0,419463087 | ATP synthesis and hydrolysis                                                             |
| 5  | 0,419463087 | cellular amino acid metabolic process                                                    |
| 5  | 0,419463087 | cellulose biosynthetic process                                                           |
| 5  | 0,419463087 | chitin catabolic process                                                                 |
| 5  | 0,419463087 | chloroplast RNA processing                                                               |

|   |             |                                                       |
|---|-------------|-------------------------------------------------------|
| 5 | 0,419463087 | methylation                                           |
| 5 | 0,419463087 | polysaccharide process                                |
| 5 | 0,419463087 | protein import into mitochondrial matrix              |
| 5 | 0,419463087 | protein metabolic process                             |
| 5 | 0,419463087 | regulation of proteolysis                             |
| 5 | 0,419463087 | ubiquitin-dependent protein catabolic process         |
| 4 | 0,33557047  | DNA methylation and repair                            |
| 4 | 0,33557047  | phosphate ion transport                               |
| 4 | 0,33557047  | pyridoxal phosphate biosynthetic process              |
| 4 | 0,33557047  | response to cadmium ion                               |
| 4 | 0,33557047  | response to cytokinin                                 |
| 4 | 0,33557047  | RNA splicing                                          |
| 4 | 0,33557047  | spermine biosynthetic process                         |
| 4 | 0,33557047  | stress-activated protein kinase signaling cascade     |
| 3 | 0,251677852 | actin cytoskeleton organization                       |
| 3 | 0,251677852 | base-excision repair                                  |
| 3 | 0,251677852 | chloroplast organization and                          |
| 3 | 0,251677852 | chorismate biosynthetic process                       |
| 3 | 0,251677852 | clathrin coat assembly                                |
| 3 | 0,251677852 | coenzyme A metabolic process                          |
| 3 | 0,251677852 | exocytosis                                            |
| 3 | 0,251677852 | flower development                                    |
| 3 | 0,251677852 | fucose metabolic process                              |
| 3 | 0,251677852 | gene silencing by RNA                                 |
| 3 | 0,251677852 | isoprenoid biosynthetic process                       |
| 3 | 0,251677852 | L-phenylalanine metabolism                            |
| 3 | 0,251677852 | mitochondrion organization                            |
| 3 | 0,251677852 | mRNA splicing, via spliceosome                        |
| 3 | 0,251677852 | nucleosome assembly                                   |
| 3 | 0,251677852 | pentose-phosphate shunt, non-oxidative branch         |
| 3 | 0,251677852 | pigment biosynthetic process                          |
| 3 | 0,251677852 | porphyrin-containing compound biosynthetic process    |
| 3 | 0,251677852 | protein-chromophore linkage                           |
| 3 | 0,251677852 | response to abscisic acid                             |
| 3 | 0,251677852 | response to heat                                      |
| 3 | 0,251677852 | response to karrikin                                  |
| 3 | 0,251677852 | ribosome biogenesis                                   |
| 3 | 0,251677852 | RNA processing                                        |
| 3 | 0,251677852 | root development                                      |
| 3 | 0,251677852 | rRNA processing                                       |
| 3 | 0,251677852 | SCF-dependent proteasomal ubiquitin-dependent protein |
| 3 | 0,251677852 | catabolic process                                     |
| 3 | 0,251677852 | sterol metabolism                                     |
| 3 | 0,251677852 | trehalose biosynthetic process                        |
| 3 | 0,251677852 | xyloglucan biosynthetic process                       |
| 2 | 0,167785235 | amino acid transmembrane transport                    |

|   |             |                                                        |
|---|-------------|--------------------------------------------------------|
| 2 | 0,167785235 | cellular glucan metabolic process                      |
|   |             | chloroplast ribulose biphosphate carboxylase complex   |
| 2 | 0,167785235 | biogenesis                                             |
| 2 | 0,167785235 | cytidine to uridine editing                            |
| 2 | 0,167785235 | embryo development ending in seed dormancy             |
| 2 | 0,167785235 | G-protein coupled receptor signaling pathway           |
| 2 | 0,167785235 | GDP-mannose metabolic process                          |
| 2 | 0,167785235 | glucose catabolic process                              |
| 2 | 0,167785235 | Golgi vesicle budding                                  |
| 2 | 0,167785235 | ion transmembrane transport                            |
| 2 | 0,167785235 | L-serine biosynthetic process                          |
| 2 | 0,167785235 | methionine biosynthetic process                        |
| 2 | 0,167785235 | mitochondrial fission                                  |
| 2 | 0,167785235 | mitochondrial mRNA modification                        |
| 2 | 0,167785235 | multicellular organism development                     |
| 2 | 0,167785235 | myo-inositol hexakisphosphate biosynthetic process     |
| 2 | 0,167785235 | nicotianamine biosynthetic process                     |
| 2 | 0,167785235 | pectin catabolic process                               |
| 2 | 0,167785235 | pentose-phosphate shunt                                |
| 2 | 0,167785235 | positive regulation of organ growth                    |
| 2 | 0,167785235 | protein autophosphorylation                            |
| 2 | 0,167785235 | protein catabolic process                              |
|   |             | protein kinase C-activating G-protein coupled receptor |
| 2 | 0,167785235 | signaling pathway                                      |
| 2 | 0,167785235 | protein secretion                                      |
| 2 | 0,167785235 | purine nucleobase biosynthetic process                 |
| 2 | 0,167785235 | regulation of defense response                         |
| 2 | 0,167785235 | regulation of flower development                       |
| 2 | 0,167785235 | regulation of gene expression                          |
| 2 | 0,167785235 | regulation of root morphogenesis                       |
| 2 | 0,167785235 | response to chitin                                     |
| 2 | 0,167785235 | response to far red light                              |
| 2 | 0,167785235 | response to hydrogen peroxide                          |
| 2 | 0,167785235 | response to salt stress                                |
| 2 | 0,167785235 | response to temperature stimulus                       |
| 2 | 0,167785235 | response to zinc ion                                   |
| 2 | 0,167785235 | ribosomal small subunit biogenesis                     |
| 2 | 0,167785235 | rRNA (guanine-N7)-methylation                          |
| 2 | 0,167785235 | seed coat development                                  |
| 2 | 0,167785235 | seed germination                                       |
| 2 | 0,167785235 | signal peptide processing                              |
| 2 | 0,167785235 | starch catabolic process                               |
| 2 | 0,167785235 | steroid biosynthetic process                           |
| 2 | 0,167785235 | systemic acquired resistance                           |
| 2 | 0,167785235 | tetrapyrrole biosynthetic process                      |
| 2 | 0,167785235 | thiosulfate transport                                  |

|   |             |                                                           |
|---|-------------|-----------------------------------------------------------|
| 2 | 0,167785235 | thylakoid membrane organization                           |
| 2 | 0,167785235 | tissue development                                        |
| 2 | 0,167785235 | TOR signaling                                             |
| 2 | 0,167785235 | toxin catabolic process                                   |
| 2 | 0,167785235 | transcription elongation from RNA polymerase II promoter  |
| 2 | 0,167785235 | triglyceride biosynthetic process                         |
| 2 | 0,167785235 | ubiquinone biosynthetic process                           |
| 2 | 0,167785235 | UDP-L-arabinose metabolic process                         |
| 2 | 0,167785235 | unidimensional cell growth                                |
| 1 | 0,083892617 | 'de novo' IMP biosynthetic process                        |
| 1 | 0,083892617 | (1->3)-beta-D-glucan biosynthetic process                 |
| 1 | 0,083892617 | actin filament bundle assembly                            |
| 1 | 0,083892617 | actin filament organization                               |
| 1 | 0,083892617 | amine metabolic process                                   |
| 1 | 0,083892617 | attachment of mitotic spindle microtubules to kinetochore |
| 1 | 0,083892617 | carbohydrate derivative metabolic process                 |
| 1 | 0,083892617 | carotenoid biosynthetic process                           |
| 1 | 0,083892617 | cell cycle                                                |
| 1 | 0,083892617 | cell differentiation                                      |
| 1 | 0,083892617 | cell division                                             |
| 1 | 0,083892617 | cellular respiration                                      |
| 1 | 0,083892617 | cellulose catabolic process                               |
| 1 | 0,083892617 | cellulose microfibril organization                        |
| 1 | 0,083892617 | ceramide metabolic process                                |
| 1 | 0,083892617 | chloride transmembrane transport                          |
| 1 | 0,083892617 | chlorophyll biosynthetic process                          |
| 1 | 0,083892617 | chromatin silencing                                       |
| 1 | 0,083892617 | cyanate metabolic process                                 |
| 1 | 0,083892617 | cysteine biosynthetic process from serine                 |
| 1 | 0,083892617 | cytidine deamination                                      |
| 1 | 0,083892617 | cytokinin metabolic process                               |
| 1 | 0,083892617 | D-amino acid catabolic process                            |
| 1 | 0,083892617 | DNA topological change                                    |
| 1 | 0,083892617 | DNA-templated transcription, termination                  |
| 1 | 0,083892617 | double-strand break repair via homologous recombination   |
| 1 | 0,083892617 | endonucleolytic cleavage                                  |
| 1 | 0,083892617 | folic acid-containing compound metabolic process          |
| 1 | 0,083892617 | galactose metabolic process                               |
| 1 | 0,083892617 | galacturonate biosynthetic process                        |
| 1 | 0,083892617 | gluconeogenesis                                           |
| 1 | 0,083892617 | glucose transmembrane transport                           |
| 1 | 0,083892617 | glutamate metabolic process                               |
| 1 | 0,083892617 | GTP biosynthetic process                                  |
| 1 | 0,083892617 | heme a biosynthetic process                               |
| 1 | 0,083892617 | histidine biosynthetic process                            |
| 1 | 0,083892617 | histone acetylation                                       |



|   |             |                                                                  |
|---|-------------|------------------------------------------------------------------|
| 1 | 0,083892617 | hormone transport                                                |
| 1 | 0,083892617 | IMP salvage                                                      |
| 1 | 0,083892617 | inositol phosphate biosynthetic process                          |
| 1 | 0,083892617 | intra-Golgi vesicle-mediated transport                           |
| 1 | 0,083892617 | leucine biosynthetic process                                     |
| 1 | 0,083892617 | mitochondrial electron transport, NADH to ubiquinone             |
| 1 | 0,083892617 | mitochondrial RNA modification                                   |
| 1 | 0,083892617 | mitochondrial translational elongation                           |
| 1 | 0,083892617 | mitotic sister chromatid cohesion                                |
| 1 | 0,083892617 | molybdopterin cofactor biosynthetic process                      |
| 1 | 0,083892617 | mucilage biosynthetic process                                    |
| 1 | 0,083892617 | nitrate assimilation                                             |
| 1 | 0,083892617 | nitrogen compound metabolic process                              |
| 1 | 0,083892617 | nucleobase-containing compound metabolic process                 |
| 1 | 0,083892617 | one-carbon metabolic process                                     |
| 1 | 0,083892617 | ornithine metabolic process                                      |
| 1 | 0,083892617 | pantothenate biosynthetic process from valine                    |
| 1 | 0,083892617 | pathogenesis                                                     |
| 1 | 0,083892617 | pectin biosynthetic process                                      |
| 1 | 0,083892617 | phosphorelay signal transduction system                          |
| 1 | 0,083892617 | phyloquinone biosynthetic process                                |
| 1 | 0,083892617 | plant-type secondary cell wall biogenesis                        |
| 1 | 0,083892617 | pollen tube growth                                               |
| 1 | 0,083892617 | pollen tube guidance                                             |
| 1 | 0,083892617 | positive regulation of cyclin-dependent protein kinase activity  |
| 1 | 0,083892617 | production of siRNA involved in chromatin silencing by small RNA |
| 1 | 0,083892617 | production of siRNA involved in RNA interference                 |
| 1 | 0,083892617 | proteasome regulatory particle assembly                          |
| 1 | 0,083892617 | protection from non-homologous end joining at telomere           |
| 1 | 0,083892617 | protein deneddylation                                            |
| 1 | 0,083892617 | protein deubiquitination                                         |
| 1 | 0,083892617 | protein import into chloroplast stroma                           |
| 1 | 0,083892617 | protein import into mitochondrial outer membrane                 |
| 1 | 0,083892617 | protein import into nucleus                                      |
| 1 | 0,083892617 | protein lipoylation                                              |
| 1 | 0,083892617 | protein localization to endoplasmic reticulum exit site          |
| 1 | 0,083892617 | protein maturation by iron-sulfur cluster transfer               |
| 1 | 0,083892617 | protein polyubiquitination                                       |
| 1 | 0,083892617 | protein retention in ER lumen                                    |
| 1 | 0,083892617 | protein stabilization                                            |
| 1 | 0,083892617 | protein targeting                                                |
| 1 | 0,083892617 | protein targeting to chloroplast                                 |
| 1 | 0,083892617 | pseudouridine synthesis                                          |
| 1 | 0,083892617 | PSII associated light-harvesting complex II catabolic process    |
| 1 | 0,083892617 | purine nucleotide biosynthetic process                           |

|   |             |                                                             |
|---|-------------|-------------------------------------------------------------|
| 1 | 0,083892617 | reciprocal meiotic recombination                            |
| 1 | 0,083892617 | regulation of ARF protein signal transduction               |
| 1 | 0,083892617 | regulation of membrane potential                            |
| 1 | 0,083892617 | regulation of monopolar cell growth                         |
| 1 | 0,083892617 | regulation of peroxisome size                               |
| 1 | 0,083892617 | regulation of pollen tube growth                            |
| 1 | 0,083892617 | regulation of RNA metabolic process                         |
| 1 | 0,083892617 | regulation of stomatal movement                             |
| 1 | 0,083892617 | regulation of stomatal opening                              |
| 1 | 0,083892617 | regulation of systemic acquired resistance                  |
| 1 | 0,083892617 | regulation of vesicle fusion                                |
| 1 | 0,083892617 | removal of superoxide radicals                              |
| 1 | 0,083892617 | response to arsenic-containing substance                    |
| 1 | 0,083892617 | response to cold                                            |
| 1 | 0,083892617 | response to desiccation                                     |
| 1 | 0,083892617 | response to ethylene                                        |
| 1 | 0,083892617 | response to gibberellin                                     |
| 1 | 0,083892617 | response to high light intensity                            |
| 1 | 0,083892617 | response to hormone                                         |
| 1 | 0,083892617 | response to metal ion                                       |
| 1 | 0,083892617 | response to red light                                       |
| 1 | 0,083892617 | response to wounding                                        |
| 1 | 0,083892617 | retrograde transport, endosome to Golgi                     |
| 1 | 0,083892617 | riboflavin biosynthetic process                             |
| 1 | 0,083892617 | ribosomal large subunit export from nucleus                 |
| 1 | 0,083892617 | RNA secondary structure unwinding                           |
| 1 | 0,083892617 | RNA surveillance                                            |
| 1 | 0,083892617 | root hair elongation                                        |
| 1 | 0,083892617 | root morphogenesis                                          |
| 1 | 0,083892617 | seed development                                            |
| 1 | 0,083892617 | seed trichome initiation                                    |
| 1 | 0,083892617 | sexual reproduction                                         |
| 1 | 0,083892617 | shoot system development                                    |
| 1 | 0,083892617 | siderophore biosynthetic process                            |
| 1 | 0,083892617 | simple leaf morphogenesis                                   |
| 1 | 0,083892617 | skotomorphogenesis                                          |
| 1 | 0,083892617 | small GTPase mediated signal transduction                   |
| 1 | 0,083892617 | snRNA pseudouridine synthesis                               |
| 1 | 0,083892617 | specification of floral organ number                        |
| 1 | 0,083892617 | spermidine biosynthetic process                             |
| 1 | 0,083892617 | spliceosomal snRNP assembly                                 |
| 1 | 0,083892617 | SRP-dependent cotranslational protein targeting to membrane |
| 1 | 0,083892617 | sulfate reduction                                           |
| 1 | 0,083892617 | superoxide metabolic process                                |
| 1 | 0,083892617 | telomeric loop formation                                    |
| 1 | 0,083892617 | tetrahydrofolate interconversion                            |

|   |             |                                                 |
|---|-------------|-------------------------------------------------|
| 1 | 0,083892617 | tetrahydrofolate metabolic process              |
| 1 | 0,083892617 | threonine metabolic process                     |
| 1 | 0,083892617 | transcription from plastid promoter             |
| 1 | 0,083892617 | transport                                       |
| 1 | 0,083892617 | tRNA modification                               |
| 1 | 0,083892617 | tryptophan catabolic process to kynurenine      |
| 1 | 0,083892617 | tyrosine biosynthetic process                   |
| 1 | 0,083892617 | vacuolar transport                              |
| 1 | 0,083892617 | valine biosynthetic process                     |
| 1 | 0,083892617 | valyl-tRNA aminoacylation                       |
| 1 | 0,083892617 | very long-chain fatty acid biosynthetic process |
| 1 | 0,083892617 | xylan biosynthetic process                      |
| 1 | 0,083892617 | xylem and phloem pattern formation              |
| 1 | 0,083892617 | xyloglucan metabolic process                    |

| <b>N.</b> | <b>%</b>    | <b>Molecular_Function</b>                     |
|-----------|-------------|-----------------------------------------------|
| 118       | 6,25        | DNA binding                                   |
| 104       | 5,508474576 | ATP binding                                   |
| 104       | 5,508474576 | transferase activity                          |
| 92        | 4,872881356 | oxidoreductase activity                       |
| 69        | 3,654661017 | structural constituent of ribosome            |
| 66        | 3,495762712 | RNA binding                                   |
| 63        | 3,336864407 | metal ion binding                             |
| 62        | 3,283898305 | protein kinase activity                       |
| 57        | 3,019067797 | zinc ion binding                              |
| 47        | 2,48940678  | hydrolase activity                            |
| 43        | 2,277542373 | ADP binding                                   |
| 41        | 2,171610169 | kinase activity                               |
| 37        | 1,959745763 | nucleic acid binding                          |
| 36        | 1,906779661 | sequence-specific DNA binding                 |
| 32        | 1,694915254 | ubiquitin protein ligase activity             |
| 27        | 1,430084746 | iron ion binding                              |
| 27        | 1,430084746 | protein serine/threonine kinase activity      |
| 25        | 1,324152542 | methyltransferase activity                    |
| 24        | 1,271186441 | ligase activity                               |
| 23        | 1,218220339 | transmembrane transporter activity            |
| 22        | 1,165254237 | GTPase activity                               |
| 20        | 1,059322034 | calcium ion binding                           |
| 20        | 1,059322034 | protein dimerization activity                 |
| 20        | 1,059322034 | ubiquitin-protein transferase activity        |
| 18        | 0,953389831 | catalytic activity                            |
| 16        | 0,847457627 | protein serine/threonine phosphatase activity |
| 14        | 0,741525424 | serine-type endopeptidase activity            |
| 13        | 0,688559322 | protein heterodimerization activity           |
| 12        | 0,63559322  | ATPase activity                               |

|    |             |                                                                 |
|----|-------------|-----------------------------------------------------------------|
| 12 | 0,63559322  | protein disulfide oxidoreductase activity                       |
| 11 | 0,582627119 | peptidase activity                                              |
| 11 | 0,582627119 | translation initiation factor activity                          |
| 10 | 0,529661017 | aspartic-type endopeptidase activity                            |
| 10 | 0,529661017 | carbohydrate binding                                            |
| 10 | 0,529661017 | structural constituent of cytoskeleton                          |
| 10 | 0,529661017 | transporter activity                                            |
| 9  | 0,476694915 | GTP binding                                                     |
| 9  | 0,476694915 | O-methyltransferase activity                                    |
| 8  | 0,423728814 | calmodulin binding                                              |
| 8  | 0,423728814 | cysteine-type peptidase activity                                |
| 8  | 0,423728814 | polysaccharide binding                                          |
| 8  | 0,423728814 | protein phosphatase regulator activity                          |
| 7  | 0,370762712 | heme binding                                                    |
| 7  | 0,370762712 | pectinesterase activity                                         |
| 7  | 0,370762712 | peptidyl-prolyl cis-trans isomerase activity                    |
| 7  | 0,370762712 | translation elongation factor activity                          |
| 7  | 0,370762712 | unfolded protein binding                                        |
| 6  | 0,31779661  | chlorophyll binding                                             |
| 6  | 0,31779661  | enzyme inhibitor activity                                       |
| 6  | 0,31779661  | isomerase activity                                              |
| 6  | 0,31779661  | quercetin 7-O-glucosyltransferase activity                      |
| 5  | 0,264830508 | amino acid transmembrane transporter activity                   |
| 5  | 0,264830508 | channel activity                                                |
| 5  | 0,264830508 | electron transfer activity                                      |
| 5  | 0,264830508 | fructose-bisphosphate aldolase activity                         |
| 5  | 0,264830508 | helicase activity                                               |
| 5  | 0,264830508 | inorganic diphosphatase activity                                |
| 5  | 0,264830508 | lyase activity                                                  |
| 5  | 0,264830508 | proton-transporting ATP synthase activity, rotational mechanism |
| 5  | 0,264830508 | receptor binding                                                |
| 5  | 0,264830508 | S-adenosylmethionine-dependent methyltransferase activity       |
| 5  | 0,264830508 | ubiquitin protein ligase binding                                |
| 4  | 0,211864407 | adenosylmethionine decarboxylase activity                       |
| 4  | 0,211864407 | calcium-dependent phospholipid binding                          |
| 4  | 0,211864407 | cellulose synthase (UDP-forming) activity                       |
| 4  | 0,211864407 | chitinase activity                                              |
| 4  | 0,211864407 | drug transmembrane transporter activity                         |
| 4  | 0,211864407 | flavin adenine dinucleotide binding                             |
| 4  | 0,211864407 | iron-sulfur cluster binding                                     |
| 4  | 0,211864407 | lipid binding                                                   |
| 4  | 0,211864407 | metal ion transmembrane transporter activity                    |
| 4  | 0,211864407 | pigment binding                                                 |
| 4  | 0,211864407 | protein homodimerization activity                               |
| 4  | 0,211864407 | serine-type carboxypeptidase activity                           |

|   |             |                                                             |
|---|-------------|-------------------------------------------------------------|
| 4 | 0,211864407 | structural molecule activity                                |
| 4 | 0,211864407 | transition metal ion binding                                |
|   |             | transmembrane receptor protein serine/threonine kinase      |
| 4 | 0,211864407 | activity                                                    |
| 4 | 0,211864407 | ubiquinol-cytochrome-c reductase activity                   |
| 3 | 0,158898305 | 2-alkenal reductase [NAD(P)] activity                       |
| 3 | 0,158898305 | 3-deoxy-7-phosphoheptulonate synthase activity              |
| 3 | 0,158898305 | antiporter activity                                         |
| 3 | 0,158898305 | chaperone binding                                           |
| 3 | 0,158898305 | DNA-3-methyladenine glycosylase activity                    |
| 3 | 0,158898305 | glycopeptide alpha-N-acetylgalactosaminidase activity       |
| 3 | 0,158898305 | hydroxymethylglutaryl-CoA reductase (NADPH) activity        |
| 3 | 0,158898305 | lipoate synthase activity                                   |
| 3 | 0,158898305 | metalloendopeptidase activity                               |
| 3 | 0,158898305 | methionine adenosyltransferase activity                     |
| 3 | 0,158898305 | NAD(P)H dehydrogenase (quinone) activity                    |
| 3 | 0,158898305 | NADH dehydrogenase (ubiquinone) activity                    |
| 3 | 0,158898305 | peroxidase activity                                         |
| 3 | 0,158898305 | phosphatase activity                                        |
| 3 | 0,158898305 | phosphatidylinositol binding                                |
| 3 | 0,158898305 | phosphoenolpyruvate carboxylase activity                    |
| 3 | 0,158898305 | phosphoglycerate kinase activity                            |
| 3 | 0,158898305 | protein binding involved in protein folding                 |
| 3 | 0,158898305 | protein domain specific binding                             |
| 3 | 0,158898305 | pyruvate kinase activity                                    |
| 3 | 0,158898305 | ribose-5-phosphate isomerase activity                       |
| 3 | 0,158898305 | thiosulfate transmembrane transporter activity              |
| 3 | 0,158898305 | transcription factor activity, transcription factor binding |
| 3 | 0,158898305 | transcription regulatory region DNA binding                 |
| 2 | 0,105932203 | 3-oxo-pimeloyl-[acp] methyl ester reductase activity        |
| 2 | 0,105932203 | actin binding                                               |
| 2 | 0,105932203 | acyl-[acyl-carrier-protein] desaturase activity             |
| 2 | 0,105932203 | beta-amylase activity                                       |
| 2 | 0,105932203 | carboxyl- or carbamoyltransferase activity                  |
| 2 | 0,105932203 | diacylglycerol O-acyltransferase activity                   |
| 2 | 0,105932203 | double-stranded DNA binding                                 |
| 2 | 0,105932203 | FAD binding                                                 |
| 2 | 0,105932203 | galactosyltransferase activity                              |
| 2 | 0,105932203 | GDP-mannose 4,6-dehydratase activity                        |
| 2 | 0,105932203 | glutathione transferase activity                            |
| 2 | 0,105932203 | hydro-lyase activity                                        |
| 2 | 0,105932203 | hydrogen ion transmembrane transporter activity             |
| 2 | 0,105932203 | inorganic phosphate transmembrane transporter activity      |
| 2 | 0,105932203 | isoamylase activity                                         |
| 2 | 0,105932203 | L-malate dehydrogenase activity                             |
| 2 | 0,105932203 | long-chain-alcohol oxidase activity                         |

|   |             |                                                                    |
|---|-------------|--------------------------------------------------------------------|
| 2 | 0,105932203 | magnesium ion binding                                              |
| 2 | 0,105932203 | manganese ion binding                                              |
| 2 | 0,105932203 | NAD+ kinase activity                                               |
| 2 | 0,105932203 | NADP binding                                                       |
| 2 | 0,105932203 | nicotianamine synthase activity                                    |
| 2 | 0,105932203 | nucleotide binding                                                 |
| 2 | 0,105932203 | O-phospho-L-serine:2-oxoglutarate aminotransferase activity        |
| 2 | 0,105932203 | oxalate-CoA ligase activity                                        |
| 2 | 0,105932203 | pectinesterase inhibitor activity                                  |
| 2 | 0,105932203 | peptide-methionine (S)-S-oxide reductase activity                  |
| 2 | 0,105932203 | peptide-N4-(N-acetyl-beta-glucosaminyl)asparagine amidase activity |
| 2 | 0,105932203 | phosphogluconate dehydrogenase (decarboxylating) activity          |
| 2 | 0,105932203 | phosphoglycerate mutase activity                                   |
| 2 | 0,105932203 | phospholipid-translocating ATPase activity                         |
| 2 | 0,105932203 | phosphoprotein phosphatase activity                                |
| 2 | 0,105932203 | phosphoric diester hydrolase activity                              |
| 2 | 0,105932203 | polygalacturonase activity                                         |
| 2 | 0,105932203 | polygalacturonate 4-alpha-galacturonosyltransferase activity       |
| 2 | 0,105932203 | protein channel activity                                           |
| 2 | 0,105932203 | protein transporter activity                                       |
| 2 | 0,105932203 | reticuline oxidase activity                                        |
| 2 | 0,105932203 | ribulose-bisphosphate carboxylase activity                         |
| 2 | 0,105932203 | RNA polymerase II regulatory region sequence-specific DNA binding  |
| 2 | 0,105932203 | RNA-directed 5'-3' RNA polymerase activity                         |
| 2 | 0,105932203 | RNA-directed DNA polymerase activity                               |
| 2 | 0,105932203 | rRNA (guanine) methyltransferase activity                          |
| 2 | 0,105932203 | rRNA binding                                                       |
| 2 | 0,105932203 | scopolin beta-glucosidase activity                                 |
| 2 | 0,105932203 | secondary active sulfate transmembrane transporter activity        |
| 2 | 0,105932203 | signal transducer activity                                         |
| 2 | 0,105932203 | sn-glycerol-3-phosphate:ubiquinone-8 oxidoreductase activity       |
| 2 | 0,105932203 | strictosidine synthase activity                                    |
| 2 | 0,105932203 | thioredoxin-disulfide reductase activity                           |
| 2 | 0,105932203 | threonine synthase activity                                        |
| 2 | 0,105932203 | transaminase activity                                              |
| 2 | 0,105932203 | transcription cofactor activity                                    |
| 2 | 0,105932203 | translation release factor activity                                |
| 2 | 0,105932203 | transmembrane receptor protein tyrosine kinase activity            |
| 2 | 0,105932203 | UDP-arabinopyranose mutase activity                                |
| 2 | 0,105932203 | uroporphyrinogen decarboxylase activity                            |
| 2 | 0,105932203 | voltage-gated anion channel activity                               |
| 2 | 0,105932203 | water channel activity                                             |
| 1 | 0,052966102 | 1-phosphatidylinositol binding                                     |
| 1 | 0,052966102 | 1,3-beta-D-glucan synthase activity                                |

|   |             |                                                          |
|---|-------------|----------------------------------------------------------|
| 1 | 0,052966102 | 2,3-dihydro-2,3-dihydroxybenzoate dehydrogenase activity |
| 1 | 0,052966102 | 3-isopropylmalate dehydrogenase activity                 |
| 1 | 0,052966102 | 6-phosphofructokinase activity                           |
| 1 | 0,052966102 | 6-phosphogluconolactonase activity                       |
| 1 | 0,052966102 | acetylglucosaminyltransferase activity                   |
| 1 | 0,052966102 | acid phosphatase activity                                |
| 1 | 0,052966102 | actin filament binding                                   |
| 1 | 0,052966102 | acyl carrier activity                                    |
| 1 | 0,052966102 | amidophosphoribosyltransferase activity                  |
| 1 | 0,052966102 | AMP deaminase activity                                   |
| 1 | 0,052966102 | ARF guanyl-nucleotide exchange factor activity           |
| 1 | 0,052966102 | arginine decarboxylase activity                          |
| 1 | 0,052966102 | arogenate dehydratase activity                           |
| 1 | 0,052966102 | aspartate kinase activity                                |
| 1 | 0,052966102 | beta-glucosidase activity                                |
| 1 | 0,052966102 | caffeoyl-CoA: alcohol caffeoyl transferase activity      |
| 1 | 0,052966102 | capsorubin synthase activity                             |
| 1 | 0,052966102 | carboxylic ester hydrolase activity                      |
| 1 | 0,052966102 | cation transmembrane transporter activity                |
| 1 | 0,052966102 | cellulase activity                                       |
| 1 | 0,052966102 | chlorophyllide a oxygenase [overall] activity            |
| 1 | 0,052966102 | clathrin binding                                         |
| 1 | 0,052966102 | cobalt ion binding                                       |
| 1 | 0,052966102 | coenzyme binding                                         |
| 1 | 0,052966102 | copper ion binding                                       |
| 1 | 0,052966102 | copper ion transmembrane transporter activity            |
| 1 | 0,052966102 | coproporphyrinogen oxidase activity                      |
| 1 | 0,052966102 | cyclic-nucleotide phosphodiesterase activity             |
| 1 | 0,052966102 | cysteine-type endopeptidase inhibitor activity           |
| 1 | 0,052966102 | cytidine deaminase activity                              |
| 1 | 0,052966102 | cytidylate kinase activity                               |
| 1 | 0,052966102 | cytochrome-c oxidase activity                            |
| 1 | 0,052966102 | D-aminoacyl-tRNA deacylase activity                      |
| 1 | 0,052966102 | dioxygenase activity                                     |
| 1 | 0,052966102 | DNA (cytosine-5-)-methyltransferase activity             |
| 1 | 0,052966102 | DNA topoisomerase type II (ATP-hydrolyzing) activity     |
| 1 | 0,052966102 | DNA-directed 5'-3' RNA polymerase activity               |
| 1 | 0,052966102 | double-stranded telomeric DNA binding                    |
| 1 | 0,052966102 | endopeptidase activity                                   |
| 1 | 0,052966102 | epoxide hydrolase activity                               |
| 1 | 0,052966102 | ethylene binding                                         |
| 1 | 0,052966102 | fatty acid elongase activity                             |
| 1 | 0,052966102 | formate-tetrahydrofolate ligase activity                 |
| 1 | 0,052966102 | G-protein coupled receptor activity                      |
| 1 | 0,052966102 | galactinol-raffinose galactosyltransferase activity      |
| 1 | 0,052966102 | glucan endo-1,3-beta-glucanase activity, C-3 substituted |

reducing group

|   |             |                                                               |
|---|-------------|---------------------------------------------------------------|
| 1 | 0,052966102 | glycine hydroxymethyltransferase activity                     |
| 1 | 0,052966102 | glycogen phosphorylase activity                               |
| 1 | 0,052966102 | GTPase activator activity                                     |
| 1 | 0,052966102 | guanyl-nucleotide exchange factor activity                    |
| 1 | 0,052966102 | homoserine kinase activity                                    |
| 1 | 0,052966102 | imidazoleglycerol-phosphate dehydratase activity              |
| 1 | 0,052966102 | inositol 3-alpha-galactosyltransferase activity               |
| 1 | 0,052966102 | intramolecular transferase activity                           |
| 1 | 0,052966102 | iron-sulfur transferase activity                              |
| 1 | 0,052966102 | magnesium chelatase activity                                  |
| 1 | 0,052966102 | magnesium protoporphyrin IX methyltransferase activity        |
| 1 | 0,052966102 | malate dehydrogenase (decarboxylating) (NAD+) activity        |
| 1 | 0,052966102 | MAP kinase kinase kinase activity                             |
| 1 | 0,052966102 | mediator complex binding                                      |
| 1 | 0,052966102 | methylenetetrahydrofolate dehydrogenase (NADP+) activity      |
| 1 | 0,052966102 | microtubule motor activity                                    |
| 1 | 0,052966102 | microtubule-severing ATPase activity                          |
| 1 | 0,052966102 | molybdopterin cofactor binding                                |
| 1 | 0,052966102 | molybdopterin synthase activity                               |
| 1 | 0,052966102 | mRNA binding                                                  |
| 1 | 0,052966102 | NAD+ ADP-ribosyltransferase activity                          |
| 1 | 0,052966102 | nitrate reductase (NADH) activity                             |
| 1 | 0,052966102 | nuclease activity                                             |
| 1 | 0,052966102 | nucleobase-containing compound kinase activity                |
| 1 | 0,052966102 | nucleosome binding                                            |
| 1 | 0,052966102 | nucleotidyltransferase activity                               |
| 1 | 0,052966102 | nutrient reservoir activity                                   |
| 1 | 0,052966102 | omega peptidase activity                                      |
|   |             | P-P-bond-hydrolysis-driven protein transmembrane              |
| 1 | 0,052966102 | transporter activity                                          |
| 1 | 0,052966102 | pantoate-beta-alanine ligase activity                         |
| 1 | 0,052966102 | peptide alpha-N-acetyltransferase activity                    |
| 1 | 0,052966102 | peptide-methionine (R)-S-oxide reductase activity             |
| 1 | 0,052966102 | phenylalanine ammonia-lyase activity                          |
| 1 | 0,052966102 | phosphatase activator activity                                |
| 1 | 0,052966102 | phosphatidylethanolamine binding                              |
| 1 | 0,052966102 | phosphatidylinositol phosphate kinase activity                |
| 1 | 0,052966102 | phosphoadenylyl-sulfate reductase (thioredoxin) activity      |
| 1 | 0,052966102 | phosphodiesterase I activity                                  |
| 1 | 0,052966102 | phosphoenolpyruvate carboxykinase (ATP) activity              |
| 1 | 0,052966102 | phosphorelay sensor kinase activity                           |
| 1 | 0,052966102 | phosphoribosylamine-glycine ligase activity                   |
| 1 | 0,052966102 | phosphoribosylformylglycinamide synthase activity             |
| 1 | 0,052966102 | phosphotransferase activity, alcohol group as acceptor        |
| 1 | 0,052966102 | Photinus-luciferin 4-monooxygenase (ATP-hydrolyzing) activity |



1 0,052966102 poly(A)-specific ribonuclease activity  
1 0,052966102 potassium channel activity  
1 0,052966102 potassium ion binding  
1 0,052966102 potassium ion transmembrane transporter activity  
1 0,052966102 prephenate dehydratase activity  
1 0,052966102 prephenate dehydrogenase (NADP+) activity  
1 0,052966102 primary amine oxidase activity  
1 0,052966102 protease binding  
1 0,052966102 protein serine/threonine phosphatase inhibitor activity  
1 0,052966102 protochlorophyllide reductase activity  
1 0,052966102 proton-transporting ATPase activity, rotational mechanism  
1 0,052966102 pseudouridine synthase activity  
1 0,052966102 pyridoxal phosphate binding  
1 0,052966102 quercetin 3-O-glucosyltransferase activity  
1 0,052966102 quinone binding  
1 0,052966102 Rab GTPase binding  
1 0,052966102 racemase activity, acting on amino acids and derivatives  
1 0,052966102 racemase and epimerase activity, acting on carbohydrates and derivatives  
1 0,052966102 Ran GTPase binding  
1 0,052966102 rhodopsin kinase activity  
1 0,052966102 riboflavin synthase activity  
1 0,052966102 ribosomal large subunit binding  
1 0,052966102 RNA polymerase II carboxy-terminal domain kinase activity  
1 0,052966102 RNA polymerase II transcription cofactor activity  
1 0,052966102 RNA polymerase II transcription factor activity, sequence-specific DNA binding  
1 0,052966102 rRNA (adenine-N6,N6-)-dimethyltransferase activity  
1 0,052966102 rRNA (guanosine-2'-O-)-methyltransferase activity  
1 0,052966102 sarcosine oxidase activity  
1 0,052966102 selenocysteine lyase activity  
1 0,052966102 serine O-acetyltransferase activity  
1 0,052966102 SNARE binding  
1 0,052966102 solute:proton antiporter activity  
1 0,052966102 superoxide dismutase activity  
1 0,052966102 TBP-class protein binding  
1 0,052966102 thiamine pyrophosphate binding  
1 0,052966102 thiol-dependent ubiquitin-specific protease activity  
1 0,052966102 threonine-type endopeptidase activity  
1 0,052966102 toxin activity  
1 0,052966102 transcription coactivator activity  
1 0,052966102 transcription factor activity, RNA polymerase II transcription factor binding  
1 0,052966102 translation initiation factor binding  
1 0,052966102 triose-phosphate isomerase activity  
1 0,052966102 tRNA methyltransferase activity

|   |             |                                              |
|---|-------------|----------------------------------------------|
| 1 | 0,052966102 | tryptophan synthase activity                 |
| 1 | 0,052966102 | tyramine N-feruloyltransferase activity      |
| 1 | 0,052966102 | UDP-glucose 6-dehydrogenase activity         |
| 1 | 0,052966102 | UDP-glucuronate 4-epimerase activity         |
| 1 | 0,052966102 | valine-tRNA ligase activity                  |
| 1 | 0,052966102 | voltage-gated chloride channel activity      |
| 1 | 0,052966102 | voltage-gated potassium channel activity     |
| 1 | 0,052966102 | xyloglucan 6-xylosyltransferase activity     |
| 1 | 0,052966102 | xyloglucan:xyloglucosyl transferase activity |

Supplementary Table S4

| <b>interaction (F_MAX)</b> | <b>name</b>                 | <b>Strength</b>     |
|----------------------------|-----------------------------|---------------------|
| neg_interaction            | F_max_interaction_PCP001326 | -0.9504270450831735 |
| neg_interaction            | F_max_interaction_PCP029800 | -0.9507025280679555 |
| neg_interaction            | F_max_interaction_PCP044863 | -0.9507065386258193 |
| neg_interaction            | F_max_interaction_PCP009753 | -0.9516368617388606 |
| neg_interaction            | F_max_interaction_PCP036481 | -0.9517109370756323 |
| neg_interaction            | F_max_interaction_PCP017080 | -0.9520571097151868 |
| neg_interaction            | F_max_interaction_PCP011779 | -0.952112859464925  |
| neg_interaction            | F_max_interaction_PCP014031 | -0.9521887362403411 |
| neg_interaction            | F_max_interaction_PCP008428 | -0.9523250562051825 |
| neg_interaction            | F_max_interaction_PCP039793 | -0.9524226699849822 |
| neg_interaction            | F_max_interaction_PCP008901 | -0.9524797215452292 |
| neg_interaction            | F_max_interaction_PCP004420 | -0.9525139779238556 |
| neg_interaction            | F_max_interaction_PCP025832 | -0.9527465942748633 |
| neg_interaction            | F_max_interaction_PCP030800 | -0.9529228255735326 |
| neg_interaction            | F_max_interaction_PCP010960 | -0.9534828263198536 |
| neg_interaction            | F_max_interaction_PCP002971 | -0.9538111912090615 |
| neg_interaction            | F_max_interaction_PCP015613 | -0.9540314982871785 |
| neg_interaction            | F_max_interaction_PCP016921 | -0.9542534988330947 |
| neg_interaction            | F_max_interaction_PCP028054 | -0.9543565645222846 |
| neg_interaction            | F_max_interaction_PCP039914 | -0.9544675362312522 |
| neg_interaction            | F_max_interaction_PCP013597 | -0.9548108530517054 |
| neg_interaction            | F_max_interaction_PCP042045 | -0.9548754383219409 |
| neg_interaction            | F_max_interaction_PCP000204 | -0.9553301763989338 |
| neg_interaction            | F_max_interaction_PCP022181 | -0.9553380810704621 |
| neg_interaction            | F_max_interaction_PCP000401 | -0.9554938037090299 |
| neg_interaction            | F_max_interaction_PCP013496 | -0.9557026108141012 |
| neg_interaction            | F_max_interaction_PCP024009 | -0.9564126313032355 |
| neg_interaction            | F_max_interaction_PCP009919 | -0.9566956946269072 |
| neg_interaction            | F_max_interaction_PCP006852 | -0.9570719940052288 |
| neg_interaction            | F_max_interaction_PCP010065 | -0.957202199307227  |
| neg_interaction            | F_max_interaction_PCP000857 | -0.9586208039456402 |
| neg_interaction            | F_max_interaction_PCP026854 | -0.9590805069270322 |
| neg_interaction            | F_max_interaction_PCP029251 | -0.9591419304112063 |
| neg_interaction            | F_max_interaction_PCP011023 | -0.9593497027280472 |
| neg_interaction            | F_max_interaction_PCP043214 | -0.9602368778901574 |
| neg_interaction            | F_max_interaction_PCP030436 | -0.9608952071154415 |
| neg_interaction            | F_max_interaction_PCP013157 | -0.9610470049917227 |
| neg_interaction            | F_max_interaction_PCP015341 | -0.9612187594316431 |
| neg_interaction            | F_max_interaction_PCP000700 | -0.9615890468809171 |
| neg_interaction            | F_max_interaction_PCP006190 | -0.9617119643650598 |
| neg_interaction            | F_max_interaction_PCP009022 | -0.9617507880965114 |
| neg_interaction            | F_max_interaction_PCP003944 | -0.9617802397995477 |
| neg_interaction            | F_max_interaction_PCP010888 | -0.9622530303760785 |
| neg_interaction            | F_max_interaction_PCP000218 | -0.962657094020461  |

|                 |                             |                     |
|-----------------|-----------------------------|---------------------|
| neg_interaction | F_max_interaction_PCP030615 | -0.9632179444066407 |
| neg_interaction | F_max_interaction_PCP010826 | -0.9636576858068524 |
| neg_interaction | F_max_interaction_PCP002652 | -0.9644369990372422 |
| neg_interaction | F_max_interaction_PCP003339 | -0.9654823856405986 |
| neg_interaction | F_max_interaction_PCP027077 | -0.9661526985536869 |
| neg_interaction | F_max_interaction_PCP018576 | -0.9664363435763177 |
| neg_interaction | F_max_interaction_PCP042536 | -0.9671772528502744 |
| neg_interaction | F_max_interaction_PCP026446 | -0.9680972384225289 |
| neg_interaction | F_max_interaction_PCP017722 | -0.9682554783509676 |
| neg_interaction | F_max_interaction_PCP031453 | -0.9684822858847598 |
| neg_interaction | F_max_interaction_PCP013976 | -0.9685261500810636 |
| neg_interaction | F_max_interaction_PCP006327 | -0.9689456608631547 |
| neg_interaction | F_max_interaction_PCP030440 | -0.9696235373979192 |
| neg_interaction | F_max_interaction_PCP024562 | -0.9696381998767968 |
| neg_interaction | F_max_interaction_PCP008236 | -0.970214007642211  |
| neg_interaction | F_max_interaction_PCP001822 | -0.9707356205346344 |
| neg_interaction | F_max_interaction_PCP000901 | -0.9709596015639821 |
| neg_interaction | F_max_interaction_PCP007726 | -0.971328515859397  |
| neg_interaction | F_max_interaction_PCP000675 | -0.9714540365329046 |
| neg_interaction | F_max_interaction_PCP044601 | -0.971544093364962  |
| neg_interaction | F_max_interaction_PCP041866 | -0.9715890262386848 |
| neg_interaction | F_max_interaction_PCP017338 | -0.972501412476144  |
| neg_interaction | F_max_interaction_PCP019657 | -0.9726607654490025 |
| neg_interaction | F_max_interaction_PCP007419 | -0.9726782562053043 |
| neg_interaction | F_max_interaction_PCP026432 | -0.973220463032113  |
| neg_interaction | F_max_interaction_PCP008634 | -0.9733440970409607 |
| neg_interaction | F_max_interaction_PCP009825 | -0.973404559434755  |
| neg_interaction | F_max_interaction_PCP044637 | -0.9735149929616961 |
| neg_interaction | F_max_interaction_PCP011606 | -0.973654862046739  |
| neg_interaction | F_max_interaction_PCP000262 | -0.973847775764776  |
| neg_interaction | F_max_interaction_PCP044174 | -0.9749011837160232 |
| neg_interaction | F_max_interaction_PCP002434 | -0.9751066383056091 |
| neg_interaction | F_max_interaction_PCP025186 | -0.9751545990284086 |
| neg_interaction | F_max_interaction_PCP002911 | -0.9758660478291683 |
| neg_interaction | F_max_interaction_PCP018281 | -0.9760432237997047 |
| neg_interaction | F_max_interaction_PCP017818 | -0.9763110668038161 |
| neg_interaction | F_max_interaction_PCP000528 | -0.9769666413059191 |
| neg_interaction | F_max_interaction_PCP000222 | -0.9773683670191241 |
| neg_interaction | F_max_interaction_PCP019597 | -0.9779644750218404 |
| neg_interaction | F_max_interaction_PCP021142 | -0.9782102567663082 |
| neg_interaction | F_max_interaction_PCP000158 | -0.9786934488128981 |
| neg_interaction | F_max_interaction_PCP028203 | -0.9789991549818572 |
| neg_interaction | F_max_interaction_PCP021679 | -0.9795037158323459 |
| neg_interaction | F_max_interaction_PCP023644 | -0.9797789508100941 |
| neg_interaction | F_max_interaction_PCP005638 | -0.9800160459617584 |
| neg_interaction | F_max_interaction_PCP040830 | -0.980158189226693  |

|                 |                             |                     |
|-----------------|-----------------------------|---------------------|
| neg_interaction | F_max_interaction_PCP007235 | -0.9802489908588101 |
| neg_interaction | F_max_interaction_PCP010607 | -0.9802545503544877 |
| neg_interaction | F_max_interaction_PCP019422 | -0.9802644125045968 |
| neg_interaction | F_max_interaction_PCP020027 | -0.9804919624118216 |
| neg_interaction | F_max_interaction_PCP014018 | -0.9805816312896984 |
| neg_interaction | F_max_interaction_PCP020093 | -0.9817042192150481 |
| neg_interaction | F_max_interaction_PCP011848 | -0.9817154259256354 |
| neg_interaction | F_max_interaction_PCP017275 | -0.9818210321143342 |
| neg_interaction | F_max_interaction_PCP025476 | -0.9819567471042175 |
| neg_interaction | F_max_interaction_PCP038637 | -0.9822196140142638 |
| neg_interaction | F_max_interaction_PCP004153 | -0.9824557009359807 |
| neg_interaction | F_max_interaction_PCP027159 | -0.9828813408955925 |
| neg_interaction | F_max_interaction_PCP023958 | -0.9834760289906533 |
| neg_interaction | F_max_interaction_PCP038106 | -0.9836606651978987 |
| neg_interaction | F_max_interaction_PCP045114 | -0.9837111053759215 |
| neg_interaction | F_max_interaction_PCP004361 | -0.9837260184763398 |
| neg_interaction | F_max_interaction_PCP009708 | -0.9838838140591399 |
| neg_interaction | F_max_interaction_PCP018152 | -0.9841548903077931 |
| neg_interaction | F_max_interaction_PCP021209 | -0.9841859963289933 |
| neg_interaction | F_max_interaction_PCP030518 | -0.9843183642011645 |
| neg_interaction | F_max_interaction_PCP013445 | -0.986676404480544  |
| neg_interaction | F_max_interaction_PCP032244 | -0.9868304711676139 |
| neg_interaction | F_max_interaction_PCP038321 | -0.9872070232737163 |
| neg_interaction | F_max_interaction_PCP020957 | -0.9887358873639066 |
| neg_interaction | F_max_interaction_PCP022491 | -0.9887418241137887 |
| neg_interaction | F_max_interaction_PCP028795 | -0.9889215262256281 |
| neg_interaction | F_max_interaction_PCP020036 | -0.9891777953605071 |
| neg_interaction | F_max_interaction_PCP008327 | -0.9898805642094749 |
| neg_interaction | F_max_interaction_PCP011965 | -0.9899037962042468 |
| neg_interaction | F_max_interaction_PCP029049 | -0.9901036219430391 |
| neg_interaction | F_max_interaction_PCP005384 | -0.990616986451057  |
| neg_interaction | F_max_interaction_PCP026279 | -0.9919025928024505 |
| neg_interaction | F_max_interaction_PCP001799 | -0.992141507722775  |
| neg_interaction | F_max_interaction_PCP008290 | -0.992145115870776  |
| neg_interaction | F_max_interaction_PCP026713 | -0.9922929629235022 |
| neg_interaction | F_max_interaction_PCP021730 | -0.9925978166631747 |
| neg_interaction | F_max_interaction_PCP034645 | -0.9926468750775052 |
| neg_interaction | F_max_interaction_PCP021132 | -0.9928619217633923 |
| neg_interaction | F_max_interaction_PCP000614 | -0.9928986080128371 |
| neg_interaction | F_max_interaction_PCP039581 | -0.9930342796700358 |
| neg_interaction | F_max_interaction_PCP042928 | -0.9949750646755191 |
| neg_interaction | F_max_interaction_PCP022495 | -0.9953687796590108 |
| neg_interaction | F_max_interaction_PCP001840 | -0.9959733548605151 |
| neg_interaction | F_max_interaction_PCP024930 | -0.9960252388798205 |
| neg_interaction | F_max_interaction_PCP027703 | -0.9961040789873425 |
| neg_interaction | F_max_interaction_PCP016842 | -0.9971687397358004 |

|                 |                             |                     |
|-----------------|-----------------------------|---------------------|
| neg_interaction | F_max_interaction_PCP031664 | -0.9979895941389629 |
| neg_interaction | F_max_interaction_PCP021692 | -0.9980814797724393 |
| neg_interaction | F_max_interaction_PCP013929 | -0.9988717861612466 |
| neg_interaction | F_max_interaction_PCP025978 | -0.9991629073351048 |
| neg_interaction | F_max_interaction_PCP037522 | -0.9991843360874256 |
| pos_interaction | F_max_interaction_PCP020054 | 0.9500137951766581  |
| pos_interaction | F_max_interaction_PCP005268 | 0.9500393647638944  |
| pos_interaction | F_max_interaction_PCP011275 | 0.9500580733748496  |
| pos_interaction | F_max_interaction_PCP044472 | 0.950088748095583   |
| pos_interaction | F_max_interaction_PCP018315 | 0.9501503641023241  |
| pos_interaction | F_max_interaction_PCP027151 | 0.9502223851946696  |
| pos_interaction | F_max_interaction_PCP020254 | 0.9502303411557265  |
| pos_interaction | F_max_interaction_PCP028794 | 0.9502665565508177  |
| pos_interaction | F_max_interaction_PCP023455 | 0.9504728702844173  |
| pos_interaction | F_max_interaction_PCP020402 | 0.9505967795069429  |
| pos_interaction | F_max_interaction_PCP044442 | 0.9509141415096586  |
| pos_interaction | F_max_interaction_PCP034153 | 0.9516249568364235  |
| pos_interaction | F_max_interaction_PCP044845 | 0.9516636608118691  |
| pos_interaction | F_max_interaction_PCP022658 | 0.9517711190232274  |
| pos_interaction | F_max_interaction_PCP003409 | 0.9518481253940869  |
| pos_interaction | F_max_interaction_PCP021687 | 0.9518923405787078  |
| pos_interaction | F_max_interaction_PCP026875 | 0.9519646045958449  |
| pos_interaction | F_max_interaction_PCP002370 | 0.9520186894137164  |
| pos_interaction | F_max_interaction_PCP017504 | 0.952175188869346   |
| pos_interaction | F_max_interaction_PCP022849 | 0.95223778296796    |
| pos_interaction | F_max_interaction_PCP039351 | 0.9522557629775082  |
| pos_interaction | F_max_interaction_PCP002867 | 0.952419811059413   |
| pos_interaction | F_max_interaction_PCP007096 | 0.9524226699849888  |
| pos_interaction | F_max_interaction_PCP020651 | 0.9527114167266674  |
| pos_interaction | F_max_interaction_PCP009961 | 0.9527343156187716  |
| pos_interaction | F_max_interaction_PCP022982 | 0.9527680906689568  |
| pos_interaction | F_max_interaction_PCP020578 | 0.9530772228021576  |
| pos_interaction | F_max_interaction_PCP030413 | 0.9535758577819349  |
| pos_interaction | F_max_interaction_PCP002552 | 0.9538863769806412  |
| pos_interaction | F_max_interaction_PCP016914 | 0.9539944336830074  |
| pos_interaction | F_max_interaction_PCP001279 | 0.9545232719944791  |
| pos_interaction | F_max_interaction_PCP010943 | 0.9546446880243487  |
| pos_interaction | F_max_interaction_PCP043122 | 0.954707788828419   |
| pos_interaction | F_max_interaction_PCP012204 | 0.9552319422867226  |
| pos_interaction | F_max_interaction_PCP006414 | 0.9553088863757837  |
| pos_interaction | F_max_interaction_PCP021997 | 0.955402394909617   |
| pos_interaction | F_max_interaction_PCP009922 | 0.9555540992748401  |
| pos_interaction | F_max_interaction_PCP040802 | 0.956252536384012   |
| pos_interaction | F_max_interaction_PCP000385 | 0.9563633136802899  |
| pos_interaction | F_max_interaction_PCP044044 | 0.9564167376094868  |

|                 |                             |                    |
|-----------------|-----------------------------|--------------------|
| pos_interaction | F_max_interaction_PCP008851 | 0.9566980914071654 |
| pos_interaction | F_max_interaction_PCP024971 | 0.9567574939571047 |
| pos_interaction | F_max_interaction_PCP001807 | 0.9569632398009208 |
| pos_interaction | F_max_interaction_PCP000531 | 0.9569988539366784 |
| pos_interaction | F_max_interaction_PCP040050 | 0.9575228978630133 |
| pos_interaction | F_max_interaction_PCP007917 | 0.9578013985145868 |
| pos_interaction | F_max_interaction_PCP008956 | 0.9582930640859897 |
| pos_interaction | F_max_interaction_PCP029022 | 0.958480577284205  |
| pos_interaction | F_max_interaction_PCP013255 | 0.958609866517489  |
| pos_interaction | F_max_interaction_PCP029046 | 0.9587869610171609 |
| pos_interaction | F_max_interaction_PCP033179 | 0.9588454328499647 |
| pos_interaction | F_max_interaction_PCP004002 | 0.9591868453831539 |
| pos_interaction | F_max_interaction_PCP017752 | 0.9593888797475633 |
| pos_interaction | F_max_interaction_PCP025052 | 0.9593904831565103 |
| pos_interaction | F_max_interaction_PCP016236 | 0.9593938701871095 |
| pos_interaction | F_max_interaction_PCP043663 | 0.959917069184069  |
| pos_interaction | F_max_interaction_PCP038764 | 0.9599621353226463 |
| pos_interaction | F_max_interaction_PCP004900 | 0.9602418103949663 |
| pos_interaction | F_max_interaction_PCP022315 | 0.9604953708048615 |
| pos_interaction | F_max_interaction_PCP007969 | 0.9605244950764615 |
| pos_interaction | F_max_interaction_PCP009402 | 0.9608745497790605 |
| pos_interaction | F_max_interaction_PCP025125 | 0.9613493415170111 |
| pos_interaction | F_max_interaction_PCP019046 | 0.9613503715582211 |
| pos_interaction | F_max_interaction_PCP021658 | 0.9614383894407754 |
| pos_interaction | F_max_interaction_PCP008572 | 0.9616869837939649 |
| pos_interaction | F_max_interaction_PCP025797 | 0.9617436835060343 |
| pos_interaction | F_max_interaction_PCP002022 | 0.9618494156624345 |
| pos_interaction | F_max_interaction_PCP024179 | 0.9621298146561897 |
| pos_interaction | F_max_interaction_PCP041893 | 0.9626606461546201 |
| pos_interaction | F_max_interaction_PCP021025 | 0.9626734536895383 |
| pos_interaction | F_max_interaction_PCP018084 | 0.962978995592626  |
| pos_interaction | F_max_interaction_PCP009020 | 0.9629990990742465 |
| pos_interaction | F_max_interaction_PCP036199 | 0.9630966617292755 |
| pos_interaction | F_max_interaction_PCP035412 | 0.963141859635216  |
| pos_interaction | F_max_interaction_PCP003826 | 0.9633641869910942 |
| pos_interaction | F_max_interaction_PCP023233 | 0.9634476944807074 |
| pos_interaction | F_max_interaction_PCP005409 | 0.963679967050657  |
| pos_interaction | F_max_interaction_PCP019466 | 0.963967044247871  |
| pos_interaction | F_max_interaction_PCP000118 | 0.9644531109510337 |
| pos_interaction | F_max_interaction_PCP030616 | 0.9646210849425596 |
| pos_interaction | F_max_interaction_PCP029258 | 0.9655130571970676 |
| pos_interaction | F_max_interaction_PCP008537 | 0.9656552817350256 |
| pos_interaction | F_max_interaction_PCP011013 | 0.9658265034154871 |
| pos_interaction | F_max_interaction_PCP002706 | 0.9658635873353574 |
| pos_interaction | F_max_interaction_PCP011950 | 0.9659016834854471 |
| pos_interaction | F_max_interaction_PCP018333 | 0.9659667379371061 |

|                 |                             |                    |
|-----------------|-----------------------------|--------------------|
| pos_interaction | F_max_interaction_PCP029690 | 0.9661573627451797 |
| pos_interaction | F_max_interaction_PCP016361 | 0.9663745322490098 |
| pos_interaction | F_max_interaction_PCP018119 | 0.9671808693638083 |
| pos_interaction | F_max_interaction_PCP024364 | 0.9672892395952428 |
| pos_interaction | F_max_interaction_PCP013388 | 0.9677673155679183 |
| pos_interaction | F_max_interaction_PCP002442 | 0.9679239704111743 |
| pos_interaction | F_max_interaction_PCP009727 | 0.9682740165633505 |
| pos_interaction | F_max_interaction_PCP006880 | 0.9683087479637839 |
| pos_interaction | F_max_interaction_PCP005226 | 0.9683706999499411 |
| pos_interaction | F_max_interaction_PCP012899 | 0.9685880432756853 |
| pos_interaction | F_max_interaction_PCP032175 | 0.9692249969115024 |
| pos_interaction | F_max_interaction_PCP007325 | 0.9694196399617379 |
| pos_interaction | F_max_interaction_PCP010905 | 0.9695497816501967 |
| pos_interaction | F_max_interaction_PCP025818 | 0.9704972253781688 |
| pos_interaction | F_max_interaction_PCP025330 | 0.9707415492148834 |
| pos_interaction | F_max_interaction_PCP000535 | 0.970850702307551  |
| pos_interaction | F_max_interaction_PCP027241 | 0.9708779406892132 |
| pos_interaction | F_max_interaction_PCP024835 | 0.9708815912003962 |
| pos_interaction | F_max_interaction_PCP015289 | 0.9710027721735508 |
| pos_interaction | F_max_interaction_PCP013539 | 0.9712221278212633 |
| pos_interaction | F_max_interaction_PCP012628 | 0.9713092832857038 |
| pos_interaction | F_max_interaction_PCP013091 | 0.9719854502748335 |
| pos_interaction | F_max_interaction_PCP023823 | 0.9720580332920632 |
| pos_interaction | F_max_interaction_PCP020355 | 0.9721769178275254 |
| pos_interaction | F_max_interaction_PCP024932 | 0.9724763840431652 |
| pos_interaction | F_max_interaction_PCP018093 | 0.972602670754235  |
| pos_interaction | F_max_interaction_PCP009081 | 0.972812689176013  |
| pos_interaction | F_max_interaction_PCP017600 | 0.9730189750333859 |
| pos_interaction | F_max_interaction_PCP029520 | 0.9730836543003035 |
| pos_interaction | F_max_interaction_PCP024618 | 0.9733560716937554 |
| pos_interaction | F_max_interaction_PCP002193 | 0.9734549389958091 |
| pos_interaction | F_max_interaction_PCP019562 | 0.9735902691507486 |
| pos_interaction | F_max_interaction_PCP023195 | 0.9736052676668911 |
| pos_interaction | F_max_interaction_PCP041151 | 0.9741457313822718 |
| pos_interaction | F_max_interaction_PCP029326 | 0.9741944489926356 |
| pos_interaction | F_max_interaction_PCP005383 | 0.9743984952342049 |
| pos_interaction | F_max_interaction_PCP025929 | 0.9746632814897994 |
| pos_interaction | F_max_interaction_PCP029669 | 0.9748162960305213 |
| pos_interaction | F_max_interaction_PCP024805 | 0.9750095816845793 |
| pos_interaction | F_max_interaction_PCP016781 | 0.9751265833276846 |
| pos_interaction | F_max_interaction_PCP003285 | 0.9751864698957602 |
| pos_interaction | F_max_interaction_PCP007333 | 0.9752805498652897 |
| pos_interaction | F_max_interaction_PCP026164 | 0.9753866371101996 |
| pos_interaction | F_max_interaction_PCP017342 | 0.9755628508383964 |
| pos_interaction | F_max_interaction_PCP000387 | 0.9755951912474762 |
| pos_interaction | F_max_interaction_PCP015739 | 0.9760350529189888 |



|                 |                             |                    |
|-----------------|-----------------------------|--------------------|
| pos_interaction | F_max_interaction_PCP023759 | 0.976398039082554  |
| pos_interaction | F_max_interaction_PCP033597 | 0.9766890301913151 |
| pos_interaction | F_max_interaction_PCP006961 | 0.976869692665302  |
| pos_interaction | F_max_interaction_PCP011867 | 0.9770764571095784 |
| pos_interaction | F_max_interaction_PCP039702 | 0.9775003320587695 |
| pos_interaction | F_max_interaction_PCP021477 | 0.9776501667162952 |
| pos_interaction | F_max_interaction_PCP005863 | 0.9778974202527162 |
| pos_interaction | F_max_interaction_PCP012044 | 0.9786231913621144 |
| pos_interaction | F_max_interaction_PCP012039 | 0.9787134643408756 |
| pos_interaction | F_max_interaction_PCP042778 | 0.9789047423375978 |
| pos_interaction | F_max_interaction_PCP025793 | 0.9790066174182429 |
| pos_interaction | F_max_interaction_PCP026145 | 0.9793159349839919 |
| pos_interaction | F_max_interaction_PCP011597 | 0.9793426022910694 |
| pos_interaction | F_max_interaction_PCP008307 | 0.9796682183084937 |
| pos_interaction | F_max_interaction_PCP013053 | 0.9800318528285441 |
| pos_interaction | F_max_interaction_PCP009532 | 0.9810193414234034 |
| pos_interaction | F_max_interaction_PCP014232 | 0.9812949817153925 |
| pos_interaction | F_max_interaction_PCP016072 | 0.9816966976822504 |
| pos_interaction | F_max_interaction_PCP022825 | 0.9818251923695596 |
| pos_interaction | F_max_interaction_PCP023916 | 0.9819925737387323 |
| pos_interaction | F_max_interaction_PCP010675 | 0.9821435506674422 |
| pos_interaction | F_max_interaction_PCP010597 | 0.9823971155218086 |
| pos_interaction | F_max_interaction_PCP013616 | 0.9832289132944829 |
| pos_interaction | F_max_interaction_PCP012225 | 0.9832841469653065 |
| pos_interaction | F_max_interaction_PCP030207 | 0.9833167705880872 |
| pos_interaction | F_max_interaction_PCP044677 | 0.9833888747687392 |
| pos_interaction | F_max_interaction_PCP031705 | 0.9836353953232132 |
| pos_interaction | F_max_interaction_PCP030120 | 0.984028748249437  |
| pos_interaction | F_max_interaction_PCP022854 | 0.9840597846167374 |
| pos_interaction | F_max_interaction_PCP023637 | 0.9843017134528834 |
| pos_interaction | F_max_interaction_PCP008611 | 0.9845399498581934 |
| pos_interaction | F_max_interaction_PCP019427 | 0.9846911002188483 |
| pos_interaction | F_max_interaction_PCP032893 | 0.9846993131928783 |
| pos_interaction | F_max_interaction_PCP032025 | 0.9849086910091613 |
| pos_interaction | F_max_interaction_PCP014364 | 0.9851557140158719 |
| pos_interaction | F_max_interaction_PCP015860 | 0.9852354543340397 |
| pos_interaction | F_max_interaction_PCP008418 | 0.9857080151160783 |
| pos_interaction | F_max_interaction_PCP007739 | 0.985858588355876  |
| pos_interaction | F_max_interaction_PCP001691 | 0.9861499681520733 |
| pos_interaction | F_max_interaction_PCP023142 | 0.9868778171348198 |
| pos_interaction | F_max_interaction_PCP006791 | 0.9870249548037471 |
| pos_interaction | F_max_interaction_PCP007629 | 0.9870453691074466 |
| pos_interaction | F_max_interaction_PCP001968 | 0.9871288020951999 |
| pos_interaction | F_max_interaction_PCP016502 | 0.9872845888815668 |
| pos_interaction | F_max_interaction_PCP008974 | 0.9873142672897257 |
| pos_interaction | F_max_interaction_PCP026440 | 0.9873721486460871 |

|                 |                             |                    |
|-----------------|-----------------------------|--------------------|
| pos_interaction | F_max_interaction_PCP040594 | 0.9874452597536774 |
| pos_interaction | F_max_interaction_PCP004331 | 0.9875930310547296 |
| pos_interaction | F_max_interaction_PCP007628 | 0.9884844656139179 |
| pos_interaction | F_max_interaction_PCP016179 | 0.9887053348232446 |
| pos_interaction | F_max_interaction_PCP007189 | 0.9887290871654909 |
| pos_interaction | F_max_interaction_PCP036761 | 0.9889982167723219 |
| pos_interaction | F_max_interaction_PCP023425 | 0.9890228821986128 |
| pos_interaction | F_max_interaction_PCP024510 | 0.9895997897530964 |
| pos_interaction | F_max_interaction_PCP019752 | 0.9897509634014603 |
| pos_interaction | F_max_interaction_PCP007714 | 0.990214210283074  |
| pos_interaction | F_max_interaction_PCP020126 | 0.9905779122523264 |
| pos_interaction | F_max_interaction_PCP029972 | 0.9906834280857565 |
| pos_interaction | F_max_interaction_PCP020662 | 0.9912076442155132 |
| pos_interaction | F_max_interaction_PCP036209 | 0.9912396924197867 |
| pos_interaction | F_max_interaction_PCP022615 | 0.9912885688534941 |
| pos_interaction | F_max_interaction_PCP017302 | 0.9913894536905041 |
| pos_interaction | F_max_interaction_PCP004198 | 0.9916660329667002 |
| pos_interaction | F_max_interaction_PCP025218 | 0.9917936287870748 |
| pos_interaction | F_max_interaction_PCP021931 | 0.9920593765584416 |
| pos_interaction | F_max_interaction_PCP017243 | 0.9925352013020766 |
| pos_interaction | F_max_interaction_PCP034953 | 0.9927632737950389 |
| pos_interaction | F_max_interaction_PCP041653 | 0.9928228105214897 |
| pos_interaction | F_max_interaction_PCP019489 | 0.9929263458097791 |
| pos_interaction | F_max_interaction_PCP008538 | 0.993429736567977  |
| pos_interaction | F_max_interaction_PCP015294 | 0.9937152123507398 |
| pos_interaction | F_max_interaction_PCP027769 | 0.9938342109613099 |
| pos_interaction | F_max_interaction_PCP042186 | 0.9947339643294721 |
| pos_interaction | F_max_interaction_PCP036482 | 0.9948679027502545 |
| pos_interaction | F_max_interaction_PCP011011 | 0.9949053243538425 |
| pos_interaction | F_max_interaction_PCP020779 | 0.9956717978298362 |
| pos_interaction | F_max_interaction_PCP034358 | 0.9956748268904991 |
| pos_interaction | F_max_interaction_PCP017660 | 0.9958352582516051 |
| pos_interaction | F_max_interaction_PCP009837 | 0.9958408691397015 |
| pos_interaction | F_max_interaction_PCP021796 | 0.995974243426042  |
| pos_interaction | F_max_interaction_PCP006452 | 0.9960322542174783 |
| pos_interaction | F_max_interaction_PCP008897 | 0.9966434230800663 |
| pos_interaction | F_max_interaction_PCP042842 | 0.9967486335896131 |
| pos_interaction | F_max_interaction_PCP030738 | 0.9972064351404585 |
| pos_interaction | F_max_interaction_PCP035592 | 0.9972115195399233 |
| pos_interaction | F_max_interaction_PCP012289 | 0.9973495687797436 |
| pos_interaction | F_max_interaction_PCP013432 | 0.9973774153076526 |
| pos_interaction | F_max_interaction_PCP000075 | 0.9974326251038016 |
| pos_interaction | F_max_interaction_PCP028294 | 0.9979130597083181 |
| pos_interaction | F_max_interaction_PCP019577 | 0.9983069383167706 |
| pos_interaction | F_max_interaction_PCP025082 | 0.9984559213752698 |
| pos_interaction | F_max_interaction_PCP019707 | 0.998526532380294  |

|                 |                             |                    |
|-----------------|-----------------------------|--------------------|
| pos_interaction | F_max_interaction_PCP000407 | 0.9985984122102679 |
| pos_interaction | F_max_interaction_PCP044447 | 0.9990774539883003 |
| pos_interaction | F_max_interaction_PCP030751 | 0.9991188269445793 |

| <b>interaction (Firmness)</b> | <b>name</b>                    | <b>Strength</b>     |
|-------------------------------|--------------------------------|---------------------|
| neg_interaction               | Firmness_interaction_PCP023663 | -0.9500987293409108 |
| neg_interaction               | Firmness_interaction_PCP018076 | -0.9501613376898963 |
| neg_interaction               | Firmness_interaction_PCP007148 | -0.9501743950201011 |
| neg_interaction               | Firmness_interaction_PCP044271 | -0.9501750002118906 |
| neg_interaction               | Firmness_interaction_PCP043823 | -0.9503273385524306 |
| neg_interaction               | Firmness_interaction_PCP042749 | -0.9503894264468606 |
| neg_interaction               | Firmness_interaction_PCP025294 | -0.9503921171772906 |
| neg_interaction               | Firmness_interaction_PCP029800 | -0.9505040329090185 |
| neg_interaction               | Firmness_interaction_PCP027838 | -0.9506483197406426 |
| neg_interaction               | Firmness_interaction_PCP015560 | -0.9506602500602985 |
| neg_interaction               | Firmness_interaction_PCP009952 | -0.950701935175218  |
| neg_interaction               | Firmness_interaction_PCP017519 | -0.9509078758470977 |
| neg_interaction               | Firmness_interaction_PCP012281 | -0.9509280706879814 |
| neg_interaction               | Firmness_interaction_PCP044118 | -0.950956273405796  |
| neg_interaction               | Firmness_interaction_PCP006014 | -0.95101155932472   |
| neg_interaction               | Firmness_interaction_PCP016419 | -0.951030387415019  |
| neg_interaction               | Firmness_interaction_PCP010167 | -0.9512301894833433 |
| neg_interaction               | Firmness_interaction_PCP023246 | -0.9513924600318197 |
| neg_interaction               | Firmness_interaction_PCP030958 | -0.9514795646190289 |
| neg_interaction               | Firmness_interaction_PCP005324 | -0.9515941384687678 |
| neg_interaction               | Firmness_interaction_PCP032163 | -0.9516007146728876 |
| neg_interaction               | Firmness_interaction_PCP036017 | -0.9516082469276924 |
| neg_interaction               | Firmness_interaction_PCP009130 | -0.9516479443710248 |
| neg_interaction               | Firmness_interaction_PCP004116 | -0.951745610158335  |
| neg_interaction               | Firmness_interaction_PCP017187 | -0.9518501732409076 |
| neg_interaction               | Firmness_interaction_PCP033244 | -0.9519643413265836 |
| neg_interaction               | Firmness_interaction_PCP006999 | -0.9519694904265297 |
| neg_interaction               | Firmness_interaction_PCP021808 | -0.9520949340305767 |
| neg_interaction               | Firmness_interaction_PCP028974 | -0.9521296801612863 |
| neg_interaction               | Firmness_interaction_PCP027939 | -0.9521381505490945 |
| neg_interaction               | Firmness_interaction_PCP035847 | -0.9521515432185521 |
| neg_interaction               | Firmness_interaction_PCP018043 | -0.9522264131517026 |
| neg_interaction               | Firmness_interaction_PCP003953 | -0.9524127864957337 |
| neg_interaction               | Firmness_interaction_PCP040177 | -0.9524128443851736 |
| neg_interaction               | Firmness_interaction_PCP001817 | -0.9524338455941083 |
| neg_interaction               | Firmness_interaction_PCP011348 | -0.9525338486813394 |
| neg_interaction               | Firmness_interaction_PCP031156 | -0.9525514043553943 |
| neg_interaction               | Firmness_interaction_PCP002656 | -0.9525967088764398 |
| neg_interaction               | Firmness_interaction_PCP029387 | -0.9526329133446292 |
| neg_interaction               | Firmness_interaction_PCP029660 | -0.9526484142784511 |

|                 |                                |                     |
|-----------------|--------------------------------|---------------------|
| neg_interaction | Firmness_interaction_PCP025181 | -0.9526799026234717 |
| neg_interaction | Firmness_interaction_PCP009685 | -0.9529754840932386 |
| neg_interaction | Firmness_interaction_PCP013657 | -0.9530216157218251 |
| neg_interaction | Firmness_interaction_PCP039588 | -0.9530776816152449 |
| neg_interaction | Firmness_interaction_PCP017958 | -0.9534004066493433 |
| neg_interaction | Firmness_interaction_PCP001711 | -0.9534344110020285 |
| neg_interaction | Firmness_interaction_PCP022495 | -0.9534423448613829 |
| neg_interaction | Firmness_interaction_PCP043175 | -0.9534786013849745 |
| neg_interaction | Firmness_interaction_PCP030565 | -0.9535127421312859 |
| neg_interaction | Firmness_interaction_PCP023127 | -0.9536307755739373 |
| neg_interaction | Firmness_interaction_PCP044528 | -0.953732560884995  |
| neg_interaction | Firmness_interaction_PCP021953 | -0.9537457697382414 |
| neg_interaction | Firmness_interaction_PCP021692 | -0.9537606278882627 |
| neg_interaction | Firmness_interaction_PCP003725 | -0.9537716062689018 |
| neg_interaction | Firmness_interaction_PCP019641 | -0.953791094550047  |
| neg_interaction | Firmness_interaction_PCP021484 | -0.9538699972166469 |
| neg_interaction | Firmness_interaction_PCP012334 | -0.9539016484440999 |
| neg_interaction | Firmness_interaction_PCP029508 | -0.9540516082783179 |
| neg_interaction | Firmness_interaction_PCP014816 | -0.9541614832384157 |
| neg_interaction | Firmness_interaction_PCP007637 | -0.9541987927186408 |
| neg_interaction | Firmness_interaction_PCP040532 | -0.9542195230712436 |
| neg_interaction | Firmness_interaction_PCP005917 | -0.9542207608042779 |
| neg_interaction | Firmness_interaction_PCP006679 | -0.95441173172876   |
| neg_interaction | Firmness_interaction_PCP018551 | -0.9545136022765626 |
| neg_interaction | Firmness_interaction_PCP005591 | -0.9548720758052816 |
| neg_interaction | Firmness_interaction_PCP000244 | -0.9548789105934942 |
| neg_interaction | Firmness_interaction_PCP024828 | -0.9549970137919731 |
| neg_interaction | Firmness_interaction_PCP003569 | -0.9550014147234553 |
| neg_interaction | Firmness_interaction_PCP028919 | -0.9550466495020642 |
| neg_interaction | Firmness_interaction_PCP000374 | -0.9552443886423988 |
| neg_interaction | Firmness_interaction_PCP029049 | -0.9553601624424691 |
| neg_interaction | Firmness_interaction_PCP002344 | -0.95541922644423   |
| neg_interaction | Firmness_interaction_PCP029420 | -0.9554898174714558 |
| neg_interaction | Firmness_interaction_PCP005668 | -0.9556359940257795 |
| neg_interaction | Firmness_interaction_PCP024630 | -0.955684353284117  |
| neg_interaction | Firmness_interaction_PCP016358 | -0.9559066284761811 |
| neg_interaction | Firmness_interaction_PCP007205 | -0.9559338638485368 |
| neg_interaction | Firmness_interaction_PCP038033 | -0.9561164386650546 |
| neg_interaction | Firmness_interaction_PCP003290 | -0.9561207894876173 |
| neg_interaction | Firmness_interaction_PCP005757 | -0.956151578699835  |
| neg_interaction | Firmness_interaction_PCP003650 | -0.9562595353842043 |
| neg_interaction | Firmness_interaction_PCP022484 | -0.9562953664081869 |
| neg_interaction | Firmness_interaction_PCP026281 | -0.9563288300384304 |
| neg_interaction | Firmness_interaction_PCP035107 | -0.9564145521075804 |
| neg_interaction | Firmness_interaction_PCP016478 | -0.9564566215696713 |
| neg_interaction | Firmness_interaction_PCP015360 | -0.9564597646600737 |

|                 |                                |                     |
|-----------------|--------------------------------|---------------------|
| neg_interaction | Firmness_interaction_PCP011437 | -0.956601402557766  |
| neg_interaction | Firmness_interaction_PCP025458 | -0.9566183165656994 |
| neg_interaction | Firmness_interaction_PCP005980 | -0.9566515328415508 |
| neg_interaction | Firmness_interaction_PCP044943 | -0.9567066008298245 |
| neg_interaction | Firmness_interaction_PCP020123 | -0.9567944064547428 |
| neg_interaction | Firmness_interaction_PCP041420 | -0.957113679040366  |
| neg_interaction | Firmness_interaction_PCP018572 | -0.9571554326571137 |
| neg_interaction | Firmness_interaction_PCP025143 | -0.9573175075113523 |
| neg_interaction | Firmness_interaction_PCP028845 | -0.9573234283099222 |
| neg_interaction | Firmness_interaction_PCP039650 | -0.957678744715591  |
| neg_interaction | Firmness_interaction_PCP009610 | -0.9577518528314489 |
| neg_interaction | Firmness_interaction_PCP011954 | -0.9578050984651407 |
| neg_interaction | Firmness_interaction_PCP006796 | -0.9580873035363092 |
| neg_interaction | Firmness_interaction_PCP038137 | -0.9581766823393263 |
| neg_interaction | Firmness_interaction_PCP015435 | -0.9582466414738877 |
| neg_interaction | Firmness_interaction_PCP020005 | -0.9582834014982918 |
| neg_interaction | Firmness_interaction_PCP045012 | -0.9583270435271976 |
| neg_interaction | Firmness_interaction_PCP034957 | -0.9584471188402947 |
| neg_interaction | Firmness_interaction_PCP015523 | -0.9589742648782466 |
| neg_interaction | Firmness_interaction_PCP025832 | -0.9590674328314496 |
| neg_interaction | Firmness_interaction_PCP010829 | -0.9592653889474531 |
| neg_interaction | Firmness_interaction_PCP032427 | -0.9593067742153583 |
| neg_interaction | Firmness_interaction_PCP035557 | -0.9593412860104817 |
| neg_interaction | Firmness_interaction_PCP005843 | -0.9593491382223239 |
| neg_interaction | Firmness_interaction_PCP003461 | -0.9593518345118285 |
| neg_interaction | Firmness_interaction_PCP007025 | -0.9594705192095188 |
| neg_interaction | Firmness_interaction_PCP022637 | -0.9594737608594861 |
| neg_interaction | Firmness_interaction_PCP017230 | -0.9594871319223703 |
| neg_interaction | Firmness_interaction_PCP027610 | -0.959789574569161  |
| neg_interaction | Firmness_interaction_PCP013603 | -0.9599472761717834 |
| neg_interaction | Firmness_interaction_PCP025057 | -0.9599524124878538 |
| neg_interaction | Firmness_interaction_PCP021730 | -0.9600385793738535 |
| neg_interaction | Firmness_interaction_PCP007219 | -0.9601567923690062 |
| neg_interaction | Firmness_interaction_PCP012685 | -0.9601993184017954 |
| neg_interaction | Firmness_interaction_PCP020380 | -0.9602670327865539 |
| neg_interaction | Firmness_interaction_PCP018811 | -0.9603758255639269 |
| neg_interaction | Firmness_interaction_PCP004145 | -0.960428910032815  |
| neg_interaction | Firmness_interaction_PCP020027 | -0.9604756421038273 |
| neg_interaction | Firmness_interaction_PCP003906 | -0.9605181336925602 |
| neg_interaction | Firmness_interaction_PCP016130 | -0.9605319388593272 |
| neg_interaction | Firmness_interaction_PCP019849 | -0.9605694516209349 |
| neg_interaction | Firmness_interaction_PCP023340 | -0.9606122029176758 |
| neg_interaction | Firmness_interaction_PCP021245 | -0.9606835516737666 |
| neg_interaction | Firmness_interaction_PCP044429 | -0.9608089594949146 |
| neg_interaction | Firmness_interaction_PCP014191 | -0.9609414741350385 |
| neg_interaction | Firmness_interaction_PCP010839 | -0.9609476296078165 |

|                 |                                |                     |
|-----------------|--------------------------------|---------------------|
| neg_interaction | Firmness_interaction_PCP043760 | -0.9610481078653675 |
| neg_interaction | Firmness_interaction_PCP024515 | -0.9611824334044221 |
| neg_interaction | Firmness_interaction_PCP005828 | -0.9614703904595621 |
| neg_interaction | Firmness_interaction_PCP020562 | -0.9614724490798572 |
| neg_interaction | Firmness_interaction_PCP025182 | -0.9614810828804072 |
| neg_interaction | Firmness_interaction_PCP024282 | -0.9616339845834503 |
| neg_interaction | Firmness_interaction_PCP008428 | -0.9617028007812298 |
| neg_interaction | Firmness_interaction_PCP014018 | -0.9619193750547562 |
| neg_interaction | Firmness_interaction_PCP001098 | -0.9620015762068858 |
| neg_interaction | Firmness_interaction_PCP028917 | -0.9620345677366806 |
| neg_interaction | Firmness_interaction_PCP024348 | -0.962080017094495  |
| neg_interaction | Firmness_interaction_PCP026564 | -0.9621552315662021 |
| neg_interaction | Firmness_interaction_PCP009792 | -0.9622234205094002 |
| neg_interaction | Firmness_interaction_PCP013590 | -0.9622250519149147 |
| neg_interaction | Firmness_interaction_PCP001799 | -0.9622851512956611 |
| neg_interaction | Firmness_interaction_PCP003398 | -0.9623085214105445 |
| neg_interaction | Firmness_interaction_PCP016633 | -0.9623759664513368 |
| neg_interaction | Firmness_interaction_PCP044104 | -0.9624963156242806 |
| neg_interaction | Firmness_interaction_PCP018461 | -0.9627227473799261 |
| neg_interaction | Firmness_interaction_PCP007585 | -0.9627768475569132 |
| neg_interaction | Firmness_interaction_PCP042861 | -0.9630071697557963 |
| neg_interaction | Firmness_interaction_PCP025746 | -0.9631526108958035 |
| neg_interaction | Firmness_interaction_PCP044194 | -0.9632346361474565 |
| neg_interaction | Firmness_interaction_PCP019509 | -0.9633278123427734 |
| neg_interaction | Firmness_interaction_PCP016523 | -0.9633851472580485 |
| neg_interaction | Firmness_interaction_PCP027631 | -0.9633994413655113 |
| neg_interaction | Firmness_interaction_PCP022373 | -0.963427317857494  |
| neg_interaction | Firmness_interaction_PCP006697 | -0.9635814710331886 |
| neg_interaction | Firmness_interaction_PCP001039 | -0.9637043662574695 |
| neg_interaction | Firmness_interaction_PCP006369 | -0.9637183631122155 |
| neg_interaction | Firmness_interaction_PCP022181 | -0.9638338200261464 |
| neg_interaction | Firmness_interaction_PCP000218 | -0.9638964076961593 |
| neg_interaction | Firmness_interaction_PCP044818 | -0.9639426397272005 |
| neg_interaction | Firmness_interaction_PCP027854 | -0.9641671377642808 |
| neg_interaction | Firmness_interaction_PCP022649 | -0.9644557619921634 |
| neg_interaction | Firmness_interaction_PCP023989 | -0.9644899241217212 |
| neg_interaction | Firmness_interaction_PCP024244 | -0.964539447631384  |
| neg_interaction | Firmness_interaction_PCP009578 | -0.9645596027234584 |
| neg_interaction | Firmness_interaction_PCP017796 | -0.9645930597804855 |
| neg_interaction | Firmness_interaction_PCP034698 | -0.9647262770912148 |
| neg_interaction | Firmness_interaction_PCP019666 | -0.9649430751718345 |
| neg_interaction | Firmness_interaction_PCP026233 | -0.9649563974949348 |
| neg_interaction | Firmness_interaction_PCP031325 | -0.9649966368805419 |
| neg_interaction | Firmness_interaction_PCP013128 | -0.9653967729452245 |
| neg_interaction | Firmness_interaction_PCP029007 | -0.965430104161118  |
| neg_interaction | Firmness_interaction_PCP044010 | -0.9656352214652566 |

|                 |                                |                     |
|-----------------|--------------------------------|---------------------|
| neg_interaction | Firmness_interaction_PCP028138 | -0.9656761330805709 |
| neg_interaction | Firmness_interaction_PCP001732 | -0.9656937070605109 |
| neg_interaction | Firmness_interaction_PCP014264 | -0.9657110677737067 |
| neg_interaction | Firmness_interaction_PCP037164 | -0.9657125693645369 |
| neg_interaction | Firmness_interaction_PCP000901 | -0.9657175518665811 |
| neg_interaction | Firmness_interaction_PCP001822 | -0.9657565842930932 |
| neg_interaction | Firmness_interaction_PCP008689 | -0.9659144751744552 |
| neg_interaction | Firmness_interaction_PCP016621 | -0.9660082847711018 |
| neg_interaction | Firmness_interaction_PCP042928 | -0.9660412531175212 |
| neg_interaction | Firmness_interaction_PCP027407 | -0.9660667374759633 |
| neg_interaction | Firmness_interaction_PCP024476 | -0.9661338614526912 |
| neg_interaction | Firmness_interaction_PCP038032 | -0.9661788594303604 |
| neg_interaction | Firmness_interaction_PCP022633 | -0.966341879811196  |
| neg_interaction | Firmness_interaction_PCP011745 | -0.9665341053961295 |
| neg_interaction | Firmness_interaction_PCP000116 | -0.9668573033765475 |
| neg_interaction | Firmness_interaction_PCP031271 | -0.9669687381981492 |
| neg_interaction | Firmness_interaction_PCP020545 | -0.9670628246379686 |
| neg_interaction | Firmness_interaction_PCP003789 | -0.9670641872280756 |
| neg_interaction | Firmness_interaction_PCP009428 | -0.9671267832437167 |
| neg_interaction | Firmness_interaction_PCP042839 | -0.9671280259642449 |
| neg_interaction | Firmness_interaction_PCP013003 | -0.9671419835055529 |
| neg_interaction | Firmness_interaction_PCP019182 | -0.9672804607459957 |
| neg_interaction | Firmness_interaction_PCP007419 | -0.967489475457604  |
| neg_interaction | Firmness_interaction_PCP045103 | -0.9674900117076191 |
| neg_interaction | Firmness_interaction_PCP011614 | -0.9675636072263025 |
| neg_interaction | Firmness_interaction_PCP045009 | -0.967627886447297  |
| neg_interaction | Firmness_interaction_PCP028054 | -0.9677970504842757 |
| neg_interaction | Firmness_interaction_PCP018220 | -0.9679095333765992 |
| neg_interaction | Firmness_interaction_PCP013454 | -0.967955141506401  |
| neg_interaction | Firmness_interaction_PCP027551 | -0.968079878025011  |
| neg_interaction | Firmness_interaction_PCP028494 | -0.968571733114039  |
| neg_interaction | Firmness_interaction_PCP023792 | -0.9686614195919212 |
| neg_interaction | Firmness_interaction_PCP022186 | -0.9690541394710048 |
| neg_interaction | Firmness_interaction_PCP001840 | -0.9691599239169255 |
| neg_interaction | Firmness_interaction_PCP032189 | -0.9691837800956067 |
| neg_interaction | Firmness_interaction_PCP017080 | -0.9691900636041076 |
| neg_interaction | Firmness_interaction_PCP021964 | -0.9691980932407323 |
| neg_interaction | Firmness_interaction_PCP014042 | -0.9692384049742029 |
| neg_interaction | Firmness_interaction_PCP005697 | -0.9692543662012216 |
| neg_interaction | Firmness_interaction_PCP006762 | -0.9693772444352802 |
| neg_interaction | Firmness_interaction_PCP014412 | -0.9694259152056826 |
| neg_interaction | Firmness_interaction_PCP027964 | -0.9694397307659833 |
| neg_interaction | Firmness_interaction_PCP007525 | -0.9698730516260022 |
| neg_interaction | Firmness_interaction_PCP034645 | -0.9699069770585149 |
| neg_interaction | Firmness_interaction_PCP039914 | -0.9699626649276948 |
| neg_interaction | Firmness_interaction_PCP044738 | -0.970006147921666  |

|                 |                                |                     |
|-----------------|--------------------------------|---------------------|
| neg_interaction | Firmness_interaction_PCP016638 | -0.9700986115552216 |
| neg_interaction | Firmness_interaction_PCP026299 | -0.9701228023379597 |
| neg_interaction | Firmness_interaction_PCP012959 | -0.9703303291025122 |
| neg_interaction | Firmness_interaction_PCP010900 | -0.9703462772592183 |
| neg_interaction | Firmness_interaction_PCP003757 | -0.9704887020073933 |
| neg_interaction | Firmness_interaction_PCP005284 | -0.9705147977038648 |
| neg_interaction | Firmness_interaction_PCP030791 | -0.9705758743360438 |
| neg_interaction | Firmness_interaction_PCP014994 | -0.9706235044577739 |
| neg_interaction | Firmness_interaction_PCP042567 | -0.9707469870567917 |
| neg_interaction | Firmness_interaction_PCP009501 | -0.9708296617791325 |
| neg_interaction | Firmness_interaction_PCP022006 | -0.9709684396995095 |
| neg_interaction | Firmness_interaction_PCP024731 | -0.9710473788966129 |
| neg_interaction | Firmness_interaction_PCP009369 | -0.9710838149019989 |
| neg_interaction | Firmness_interaction_PCP021406 | -0.9711087584762709 |
| neg_interaction | Firmness_interaction_PCP040138 | -0.9711424864345957 |
| neg_interaction | Firmness_interaction_PCP030542 | -0.9711878948190812 |
| neg_interaction | Firmness_interaction_PCP017890 | -0.9712206349970839 |
| neg_interaction | Firmness_interaction_PCP000614 | -0.9712673061240212 |
| neg_interaction | Firmness_interaction_PCP015053 | -0.9713995824883356 |
| neg_interaction | Firmness_interaction_PCP018666 | -0.9714128657298164 |
| neg_interaction | Firmness_interaction_PCP000094 | -0.9714327038984454 |
| neg_interaction | Firmness_interaction_PCP011360 | -0.971613917709247  |
| neg_interaction | Firmness_interaction_PCP013644 | -0.9717450539698923 |
| neg_interaction | Firmness_interaction_PCP043197 | -0.9719245264597087 |
| neg_interaction | Firmness_interaction_PCP013513 | -0.9719649362204813 |
| neg_interaction | Firmness_interaction_PCP019866 | -0.9720263695668351 |
| neg_interaction | Firmness_interaction_PCP044863 | -0.9720495341042306 |
| neg_interaction | Firmness_interaction_PCP001986 | -0.972065268246645  |
| neg_interaction | Firmness_interaction_PCP017830 | -0.9720686163501451 |
| neg_interaction | Firmness_interaction_PCP007476 | -0.9722740837110456 |
| neg_interaction | Firmness_interaction_PCP036035 | -0.972676339454183  |
| neg_interaction | Firmness_interaction_PCP023341 | -0.9728178538849922 |
| neg_interaction | Firmness_interaction_PCP012505 | -0.9728331499659675 |
| neg_interaction | Firmness_interaction_PCP036562 | -0.9728725241146703 |
| neg_interaction | Firmness_interaction_PCP027006 | -0.9729091811198547 |
| neg_interaction | Firmness_interaction_PCP005129 | -0.9731125849407245 |
| neg_interaction | Firmness_interaction_PCP042045 | -0.9731400955763249 |
| neg_interaction | Firmness_interaction_PCP020887 | -0.9732722627966837 |
| neg_interaction | Firmness_interaction_PCP043711 | -0.9734127530873466 |
| neg_interaction | Firmness_interaction_PCP042536 | -0.9734130089032066 |
| neg_interaction | Firmness_interaction_PCP007997 | -0.9735072024383117 |
| neg_interaction | Firmness_interaction_PCP011606 | -0.97353715557127   |
| neg_interaction | Firmness_interaction_PCP021948 | -0.9738164250326856 |
| neg_interaction | Firmness_interaction_PCP004181 | -0.9739994092464422 |
| neg_interaction | Firmness_interaction_PCP014950 | -0.9741419762768597 |
| neg_interaction | Firmness_interaction_PCP005629 | -0.9743744099478863 |



|                 |                                |                     |
|-----------------|--------------------------------|---------------------|
| neg_interaction | Firmness_interaction_PCP034181 | -0.9744170179578611 |
| neg_interaction | Firmness_interaction_PCP018636 | -0.9745126396752241 |
| neg_interaction | Firmness_interaction_PCP012059 | -0.97454355553563   |
| neg_interaction | Firmness_interaction_PCP040158 | -0.9745844602010628 |
| neg_interaction | Firmness_interaction_PCP008881 | -0.9746611550635819 |
| neg_interaction | Firmness_interaction_PCP022145 | -0.9746698874561504 |
| neg_interaction | Firmness_interaction_PCP012551 | -0.9749728276149205 |
| neg_interaction | Firmness_interaction_PCP002075 | -0.974995594085163  |
| neg_interaction | Firmness_interaction_PCP016856 | -0.975052171345744  |
| neg_interaction | Firmness_interaction_PCP007024 | -0.9751723594793502 |
| neg_interaction | Firmness_interaction_PCP032244 | -0.9751812448657681 |
| neg_interaction | Firmness_interaction_PCP012705 | -0.9753378132307562 |
| neg_interaction | Firmness_interaction_PCP003886 | -0.9754758150449296 |
| neg_interaction | Firmness_interaction_PCP012138 | -0.9755150323712973 |
| neg_interaction | Firmness_interaction_PCP028873 | -0.9755430719984619 |
| neg_interaction | Firmness_interaction_PCP002106 | -0.9756836790192153 |
| neg_interaction | Firmness_interaction_PCP008901 | -0.9757252341933241 |
| neg_interaction | Firmness_interaction_PCP012266 | -0.9757556420378724 |
| neg_interaction | Firmness_interaction_PCP013399 | -0.9757822280930205 |
| neg_interaction | Firmness_interaction_PCP005636 | -0.9758197547023837 |
| neg_interaction | Firmness_interaction_PCP003715 | -0.9759275378827353 |
| neg_interaction | Firmness_interaction_PCP000300 | -0.9759594868593479 |
| neg_interaction | Firmness_interaction_PCP023040 | -0.9760053603526637 |
| neg_interaction | Firmness_interaction_PCP009356 | -0.9762017243280057 |
| neg_interaction | Firmness_interaction_PCP001044 | -0.9763888126042372 |
| neg_interaction | Firmness_interaction_PCP005468 | -0.9764581698899764 |
| neg_interaction | Firmness_interaction_PCP017605 | -0.9764985358609064 |
| neg_interaction | Firmness_interaction_PCP014662 | -0.97671214532608   |
| neg_interaction | Firmness_interaction_PCP040424 | -0.9767956187404567 |
| neg_interaction | Firmness_interaction_PCP030891 | -0.9768986931587005 |
| neg_interaction | Firmness_interaction_PCP002057 | -0.9769041031433083 |
| neg_interaction | Firmness_interaction_PCP012078 | -0.9769161917033129 |
| neg_interaction | Firmness_interaction_PCP008395 | -0.9769951798786113 |
| neg_interaction | Firmness_interaction_PCP006737 | -0.9769961985224648 |
| neg_interaction | Firmness_interaction_PCP017043 | -0.9770518850340723 |
| neg_interaction | Firmness_interaction_PCP030440 | -0.9771232487430569 |
| neg_interaction | Firmness_interaction_PCP025874 | -0.9774512265949618 |
| neg_interaction | Firmness_interaction_PCP004423 | -0.9777329179915925 |
| neg_interaction | Firmness_interaction_PCP004361 | -0.9779965791394711 |
| neg_interaction | Firmness_interaction_PCP002206 | -0.9780794108863963 |
| neg_interaction | Firmness_interaction_PCP012009 | -0.9781187613159206 |
| neg_interaction | Firmness_interaction_PCP000150 | -0.978177725871899  |
| neg_interaction | Firmness_interaction_PCP028137 | -0.9781786007340344 |
| neg_interaction | Firmness_interaction_PCP028279 | -0.9783135377448597 |
| neg_interaction | Firmness_interaction_PCP004152 | -0.9783829593518393 |
| neg_interaction | Firmness_interaction_PCP023052 | -0.9784560740910294 |

|                 |                                |                     |
|-----------------|--------------------------------|---------------------|
| neg_interaction | Firmness_interaction_PCP030800 | -0.9787202300460438 |
| neg_interaction | Firmness_interaction_PCP024823 | -0.9787748145727531 |
| neg_interaction | Firmness_interaction_PCP003076 | -0.9788609591933678 |
| neg_interaction | Firmness_interaction_PCP008236 | -0.978950529558207  |
| neg_interaction | Firmness_interaction_PCP029756 | -0.979162042191987  |
| neg_interaction | Firmness_interaction_PCP044270 | -0.9794512013235875 |
| neg_interaction | Firmness_interaction_PCP002318 | -0.9794622625906109 |
| neg_interaction | Firmness_interaction_PCP005508 | -0.9794800525440565 |
| neg_interaction | Firmness_interaction_PCP029191 | -0.9795431912862883 |
| neg_interaction | Firmness_interaction_PCP010311 | -0.9798146793258334 |
| neg_interaction | Firmness_interaction_PCP001320 | -0.9800131994351123 |
| neg_interaction | Firmness_interaction_PCP014796 | -0.9801460466613338 |
| neg_interaction | Firmness_interaction_PCP002219 | -0.9801815642454322 |
| neg_interaction | Firmness_interaction_PCP039584 | -0.9801915706242245 |
| neg_interaction | Firmness_interaction_PCP028795 | -0.9804678971866562 |
| neg_interaction | Firmness_interaction_PCP013989 | -0.9804892308621489 |
| neg_interaction | Firmness_interaction_PCP026021 | -0.9805185219614717 |
| neg_interaction | Firmness_interaction_PCP003311 | -0.9808084425080714 |
| neg_interaction | Firmness_interaction_PCP019367 | -0.9810001411877903 |
| neg_interaction | Firmness_interaction_PCP020458 | -0.9810511304853744 |
| neg_interaction | Firmness_interaction_PCP044598 | -0.9810624229771538 |
| neg_interaction | Firmness_interaction_PCP012050 | -0.9811823852430845 |
| neg_interaction | Firmness_interaction_PCP008521 | -0.981230224663977  |
| neg_interaction | Firmness_interaction_PCP010800 | -0.9812927601386428 |
| neg_interaction | Firmness_interaction_PCP013496 | -0.9815230615076213 |
| neg_interaction | Firmness_interaction_PCP010395 | -0.9815641396861902 |
| neg_interaction | Firmness_interaction_PCP026217 | -0.9816446768274417 |
| neg_interaction | Firmness_interaction_PCP041960 | -0.9816572299540699 |
| neg_interaction | Firmness_interaction_PCP015888 | -0.9816707250076814 |
| neg_interaction | Firmness_interaction_PCP026151 | -0.9816737062159362 |
| neg_interaction | Firmness_interaction_PCP020036 | -0.9817052878904943 |
| neg_interaction | Firmness_interaction_PCP030584 | -0.9818533187877208 |
| neg_interaction | Firmness_interaction_PCP021689 | -0.9818576044912324 |
| neg_interaction | Firmness_interaction_PCP021880 | -0.9819026871600113 |
| neg_interaction | Firmness_interaction_PCP016282 | -0.9819683363171128 |
| neg_interaction | Firmness_interaction_PCP011018 | -0.9821000460174635 |
| neg_interaction | Firmness_interaction_PCP014171 | -0.982170209884817  |
| neg_interaction | Firmness_interaction_PCP025893 | -0.982233031671566  |
| neg_interaction | Firmness_interaction_PCP002911 | -0.9824834177994304 |
| neg_interaction | Firmness_interaction_PCP041092 | -0.9824950399630543 |
| neg_interaction | Firmness_interaction_PCP007570 | -0.9825942629138521 |
| neg_interaction | Firmness_interaction_PCP030615 | -0.9829275994628156 |
| neg_interaction | Firmness_interaction_PCP009879 | -0.9829885266645685 |
| neg_interaction | Firmness_interaction_PCP040479 | -0.9829973743151325 |
| neg_interaction | Firmness_interaction_PCP023705 | -0.9830024520684835 |
| neg_interaction | Firmness_interaction_PCP029082 | -0.9833420226784171 |

|                 |                                |                     |
|-----------------|--------------------------------|---------------------|
| neg_interaction | Firmness_interaction_PCP009783 | -0.983474918364157  |
| neg_interaction | Firmness_interaction_PCP022491 | -0.9835492987157448 |
| neg_interaction | Firmness_interaction_PCP032824 | -0.983659974206397  |
| neg_interaction | Firmness_interaction_PCP022894 | -0.9840347407745971 |
| neg_interaction | Firmness_interaction_PCP029665 | -0.9840801177173193 |
| neg_interaction | Firmness_interaction_PCP025880 | -0.9841197078309902 |
| neg_interaction | Firmness_interaction_PCP024466 | -0.9842835702139743 |
| neg_interaction | Firmness_interaction_PCP038637 | -0.9843097017235068 |
| neg_interaction | Firmness_interaction_PCP019586 | -0.9844228917186643 |
| neg_interaction | Firmness_interaction_PCP024127 | -0.9846969521851769 |
| neg_interaction | Firmness_interaction_PCP013401 | -0.9847170791509483 |
| neg_interaction | Firmness_interaction_PCP028951 | -0.9847480422857131 |
| neg_interaction | Firmness_interaction_PCP021924 | -0.9847954914383402 |
| neg_interaction | Firmness_interaction_PCP011322 | -0.9849394842302552 |
| neg_interaction | Firmness_interaction_PCP000857 | -0.985013788594371  |
| neg_interaction | Firmness_interaction_PCP040626 | -0.9853032374262606 |
| neg_interaction | Firmness_interaction_PCP014304 | -0.9853096005584809 |
| neg_interaction | Firmness_interaction_PCP004607 | -0.9854100204392953 |
| neg_interaction | Firmness_interaction_PCP004153 | -0.9854212045425008 |
| neg_interaction | Firmness_interaction_PCP022959 | -0.9855292365616909 |
| neg_interaction | Firmness_interaction_PCP016840 | -0.9857796880260876 |
| neg_interaction | Firmness_interaction_PCP041866 | -0.9857997856859295 |
| neg_interaction | Firmness_interaction_PCP031467 | -0.9858513048914482 |
| neg_interaction | Firmness_interaction_PCP024718 | -0.9860597421491055 |
| neg_interaction | Firmness_interaction_PCP042351 | -0.9861649008426252 |
| neg_interaction | Firmness_interaction_PCP026647 | -0.9867054939268003 |
| neg_interaction | Firmness_interaction_PCP009200 | -0.9873563405789596 |
| neg_interaction | Firmness_interaction_PCP030544 | -0.9874336272915815 |
| neg_interaction | Firmness_interaction_PCP004200 | -0.9874848615972412 |
| neg_interaction | Firmness_interaction_PCP017016 | -0.9874896236667403 |
| neg_interaction | Firmness_interaction_PCP026243 | -0.9875927430426557 |
| neg_interaction | Firmness_interaction_PCP018086 | -0.9877192728242857 |
| neg_interaction | Firmness_interaction_PCP015491 | -0.9880638969211469 |
| neg_interaction | Firmness_interaction_PCP025186 | -0.9880749582159569 |
| neg_interaction | Firmness_interaction_PCP011779 | -0.9881050494008925 |
| neg_interaction | Firmness_interaction_PCP028533 | -0.9883375410074343 |
| neg_interaction | Firmness_interaction_PCP043766 | -0.9885881736235907 |
| neg_interaction | Firmness_interaction_PCP005981 | -0.9888590919803716 |
| neg_interaction | Firmness_interaction_PCP027159 | -0.9889648657778419 |
| neg_interaction | Firmness_interaction_PCP042277 | -0.9890695911305523 |
| neg_interaction | Firmness_interaction_PCP020366 | -0.9891828732239556 |
| neg_interaction | Firmness_interaction_PCP008347 | -0.9892760142819017 |
| neg_interaction | Firmness_interaction_PCP007000 | -0.9893907836257878 |
| neg_interaction | Firmness_interaction_PCP016971 | -0.9894060539664803 |
| neg_interaction | Firmness_interaction_PCP029251 | -0.9894442167339831 |
| neg_interaction | Firmness_interaction_PCP008387 | -0.9894865560015478 |

|                 |                                |                     |
|-----------------|--------------------------------|---------------------|
| neg_interaction | Firmness_interaction_PCP029239 | -0.9895178993001689 |
| neg_interaction | Firmness_interaction_PCP013888 | -0.989620951015365  |
| neg_interaction | Firmness_interaction_PCP020117 | -0.9896796855099026 |
| neg_interaction | Firmness_interaction_PCP044637 | -0.9897225236017366 |
| neg_interaction | Firmness_interaction_PCP008688 | -0.9897814051496635 |
| neg_interaction | Firmness_interaction_PCP041732 | -0.9898506219868775 |
| neg_interaction | Firmness_interaction_PCP017758 | -0.9899930106276531 |
| neg_interaction | Firmness_interaction_PCP002740 | -0.9900125056612195 |
| neg_interaction | Firmness_interaction_PCP006224 | -0.9900904449486735 |
| neg_interaction | Firmness_interaction_PCP002124 | -0.9901102747267104 |
| neg_interaction | Firmness_interaction_PCP024439 | -0.9905882180134504 |
| neg_interaction | Firmness_interaction_PCP002435 | -0.9906708602812908 |
| neg_interaction | Firmness_interaction_PCP018424 | -0.9906796076275821 |
| neg_interaction | Firmness_interaction_PCP015729 | -0.9907410990384593 |
| neg_interaction | Firmness_interaction_PCP001097 | -0.9909061213098085 |
| neg_interaction | Firmness_interaction_PCP021679 | -0.9909285657591506 |
| neg_interaction | Firmness_interaction_PCP027606 | -0.9909616875511423 |
| neg_interaction | Firmness_interaction_PCP026014 | -0.9911459114687828 |
| neg_interaction | Firmness_interaction_PCP024781 | -0.9912324287715568 |
| neg_interaction | Firmness_interaction_PCP005638 | -0.9912754185586921 |
| neg_interaction | Firmness_interaction_PCP031562 | -0.9913330296201303 |
| neg_interaction | Firmness_interaction_PCP014515 | -0.9914040871117709 |
| neg_interaction | Firmness_interaction_PCP012231 | -0.9916256763365396 |
| neg_interaction | Firmness_interaction_PCP026800 | -0.9918278402047577 |
| neg_interaction | Firmness_interaction_PCP021185 | -0.9919546535308955 |
| neg_interaction | Firmness_interaction_PCP004420 | -0.9921286530607524 |
| neg_interaction | Firmness_interaction_PCP019597 | -0.9921511633527503 |
| neg_interaction | Firmness_interaction_PCP009919 | -0.992446416218263  |
| neg_interaction | Firmness_interaction_PCP031396 | -0.9926175144045606 |
| neg_interaction | Firmness_interaction_PCP009753 | -0.9926839380984    |
| neg_interaction | Firmness_interaction_PCP021367 | -0.9927098059974453 |
| neg_interaction | Firmness_interaction_PCP024738 | -0.9927884803932928 |
| neg_interaction | Firmness_interaction_PCP022985 | -0.9928231091056736 |
| neg_interaction | Firmness_interaction_PCP044272 | -0.9928623867712157 |
| neg_interaction | Firmness_interaction_PCP008180 | -0.9930154990063202 |
| neg_interaction | Firmness_interaction_PCP026432 | -0.9930713092304182 |
| neg_interaction | Firmness_interaction_PCP007785 | -0.993093488401597  |
| neg_interaction | Firmness_interaction_PCP014077 | -0.9933368488843541 |
| neg_interaction | Firmness_interaction_PCP031186 | -0.9934440215972798 |
| neg_interaction | Firmness_interaction_PCP011731 | -0.9936261018799006 |
| neg_interaction | Firmness_interaction_PCP023329 | -0.993665908341458  |
| neg_interaction | Firmness_interaction_PCP027077 | -0.9939188432466153 |
| neg_interaction | Firmness_interaction_PCP014088 | -0.9940773012550611 |
| neg_interaction | Firmness_interaction_PCP024140 | -0.9942525437036995 |
| neg_interaction | Firmness_interaction_PCP002298 | -0.9944430599444071 |
| neg_interaction | Firmness_interaction_PCP012166 | -0.9946090246137925 |

|                 |                                |                     |
|-----------------|--------------------------------|---------------------|
| neg_interaction | Firmness_interaction_PCP001793 | -0.9946588572720007 |
| neg_interaction | Firmness_interaction_PCP021754 | -0.9947549243875474 |
| neg_interaction | Firmness_interaction_PCP006327 | -0.9948108892471887 |
| neg_interaction | Firmness_interaction_PCP006190 | -0.9949960096765255 |
| neg_interaction | Firmness_interaction_PCP034470 | -0.9950875639888209 |
| neg_interaction | Firmness_interaction_PCP017208 | -0.9952861294485604 |
| neg_interaction | Firmness_interaction_PCP015521 | -0.9953682816745487 |
| neg_interaction | Firmness_interaction_PCP003339 | -0.995442638419624  |
| neg_interaction | Firmness_interaction_PCP011678 | -0.9956132596455247 |
| neg_interaction | Firmness_interaction_PCP031453 | -0.9960118936818387 |
| neg_interaction | Firmness_interaction_PCP036745 | -0.9961787956357636 |
| neg_interaction | Firmness_interaction_PCP011023 | -0.9961997791270345 |
| neg_interaction | Firmness_interaction_PCP017955 | -0.9964390093485871 |
| neg_interaction | Firmness_interaction_PCP011452 | -0.996494999061546  |
| neg_interaction | Firmness_interaction_PCP027675 | -0.9965784664958881 |
| neg_interaction | Firmness_interaction_PCP013976 | -0.9967152100048847 |
| neg_interaction | Firmness_interaction_PCP004014 | -0.9967611347126937 |
| neg_interaction | Firmness_interaction_PCP027928 | -0.9967845661130442 |
| neg_interaction | Firmness_interaction_PCP004573 | -0.9968975190142186 |
| neg_interaction | Firmness_interaction_PCP021189 | -0.9970434590011046 |
| neg_interaction | Firmness_interaction_PCP010491 | -0.9972977047293379 |
| neg_interaction | Firmness_interaction_PCP000538 | -0.9975777243817013 |
| neg_interaction | Firmness_interaction_PCP023623 | -0.9976397371363112 |
| neg_interaction | Firmness_interaction_PCP008900 | -0.9977484309641287 |
| neg_interaction | Firmness_interaction_PCP006768 | -0.9980631348192514 |
| neg_interaction | Firmness_interaction_PCP039793 | -0.9982681280622843 |
| neg_interaction | Firmness_interaction_PCP010888 | -0.9982911275301496 |
| neg_interaction | Firmness_interaction_PCP043214 | -0.9983234773495314 |
| neg_interaction | Firmness_interaction_PCP017440 | -0.9983644580787115 |
| neg_interaction | Firmness_interaction_PCP005162 | -0.9984390047617282 |
| neg_interaction | Firmness_interaction_PCP024222 | -0.9984491133938406 |
| neg_interaction | Firmness_interaction_PCP030893 | -0.9986948707156158 |
| neg_interaction | Firmness_interaction_PCP013597 | -0.9987804090518695 |
| neg_interaction | Firmness_interaction_PCP037604 | -0.9990908085284317 |
| neg_interaction | Firmness_interaction_PCP044040 | -0.9992113752532393 |
| neg_interaction | Firmness_interaction_PCP000204 | -0.9992579823941758 |
| neg_interaction | Firmness_interaction_PCP010814 | -0.9994244051025057 |
| pos_interaction | Firmness_interaction_PCP039467 | 0.9500053766959518  |
| pos_interaction | Firmness_interaction_PCP021038 | 0.9500629169411768  |
| pos_interaction | Firmness_interaction_PCP022364 | 0.9501273846745764  |
| pos_interaction | Firmness_interaction_PCP017243 | 0.9502843358592271  |
| pos_interaction | Firmness_interaction_PCP025395 | 0.9503096796110891  |
| pos_interaction | Firmness_interaction_PCP030840 | 0.9503278490566942  |
| pos_interaction | Firmness_interaction_PCP037547 | 0.9506082008285639  |
| pos_interaction | Firmness_interaction_PCP029972 | 0.9508536971079413  |

|                 |                                |                    |
|-----------------|--------------------------------|--------------------|
| pos_interaction | Firmness_interaction_PCP015930 | 0.9509829780199877 |
| pos_interaction | Firmness_interaction_PCP009441 | 0.9512631919189215 |
| pos_interaction | Firmness_interaction_PCP016790 | 0.9512716683334824 |
| pos_interaction | Firmness_interaction_PCP017793 | 0.9513000161189038 |
| pos_interaction | Firmness_interaction_PCP016718 | 0.9513488052900495 |
| pos_interaction | Firmness_interaction_PCP008897 | 0.9514861378392024 |
| pos_interaction | Firmness_interaction_PCP026310 | 0.9516891808294059 |
| pos_interaction | Firmness_interaction_PCP022886 | 0.9516904679991325 |
| pos_interaction | Firmness_interaction_PCP019776 | 0.951697443049827  |
| pos_interaction | Firmness_interaction_PCP013355 | 0.9517068771086052 |
| pos_interaction | Firmness_interaction_PCP026981 | 0.9517321813668307 |
| pos_interaction | Firmness_interaction_PCP044845 | 0.9517606316811673 |
| pos_interaction | Firmness_interaction_PCP023645 | 0.9517803874699754 |
| pos_interaction | Firmness_interaction_PCP028160 | 0.951803510924949  |
| pos_interaction | Firmness_interaction_PCP034458 | 0.9518885761351193 |
| pos_interaction | Firmness_interaction_PCP019950 | 0.9518993295869571 |
| pos_interaction | Firmness_interaction_PCP028903 | 0.9521319126952884 |
| pos_interaction | Firmness_interaction_PCP012173 | 0.9521917121097101 |
| pos_interaction | Firmness_interaction_PCP003826 | 0.952278104992597  |
| pos_interaction | Firmness_interaction_PCP010112 | 0.9523054673212676 |
| pos_interaction | Firmness_interaction_PCP004146 | 0.9525695065363957 |
| pos_interaction | Firmness_interaction_PCP036502 | 0.9527512442563031 |
| pos_interaction | Firmness_interaction_PCP035298 | 0.9529072557644855 |
| pos_interaction | Firmness_interaction_PCP016623 | 0.9531175824260948 |
| pos_interaction | Firmness_interaction_PCP034042 | 0.9531429723316972 |
| pos_interaction | Firmness_interaction_PCP006682 | 0.9532874657828654 |
| pos_interaction | Firmness_interaction_PCP025683 | 0.9535052840028253 |
| pos_interaction | Firmness_interaction_PCP040196 | 0.9535137445252714 |
| pos_interaction | Firmness_interaction_PCP010905 | 0.9535451409726812 |
| pos_interaction | Firmness_interaction_PCP006654 | 0.9535836088519553 |
| pos_interaction | Firmness_interaction_PCP039351 | 0.9536567603294586 |
| pos_interaction | Firmness_interaction_PCP029711 | 0.9538294962050432 |
| pos_interaction | Firmness_interaction_PCP012340 | 0.9539124969380036 |
| pos_interaction | Firmness_interaction_PCP028759 | 0.9539882156465409 |
| pos_interaction | Firmness_interaction_PCP021658 | 0.9543190795730067 |
| pos_interaction | Firmness_interaction_PCP000349 | 0.9543938146693066 |
| pos_interaction | Firmness_interaction_PCP022658 | 0.9545262054602274 |
| pos_interaction | Firmness_interaction_PCP000591 | 0.954546260286199  |
| pos_interaction | Firmness_interaction_PCP030738 | 0.9546047119280314 |
| pos_interaction | Firmness_interaction_PCP012676 | 0.9546768020854416 |
| pos_interaction | Firmness_interaction_PCP012344 | 0.9549030183327503 |
| pos_interaction | Firmness_interaction_PCP020216 | 0.9550049748156856 |
| pos_interaction | Firmness_interaction_PCP040381 | 0.9551443591319921 |
| pos_interaction | Firmness_interaction_PCP007836 | 0.9552103709798825 |
| pos_interaction | Firmness_interaction_PCP041357 | 0.9552854071917793 |
| pos_interaction | Firmness_interaction_PCP005237 | 0.9553471931523738 |

|                 |                                |                    |
|-----------------|--------------------------------|--------------------|
| pos_interaction | Firmness_interaction_PCP009257 | 0.955487829819279  |
| pos_interaction | Firmness_interaction_PCP016086 | 0.9556412922496564 |
| pos_interaction | Firmness_interaction_PCP004900 | 0.9557037793718968 |
| pos_interaction | Firmness_interaction_PCP015289 | 0.9557388259463097 |
| pos_interaction | Firmness_interaction_PCP010690 | 0.9557500440069715 |
| pos_interaction | Firmness_interaction_PCP006866 | 0.9558246958154939 |
| pos_interaction | Firmness_interaction_PCP026930 | 0.9560976726477253 |
| pos_interaction | Firmness_interaction_PCP005647 | 0.9561063539740844 |
| pos_interaction | Firmness_interaction_PCP019872 | 0.9561076801931877 |
| pos_interaction | Firmness_interaction_PCP023233 | 0.9563604100881583 |
| pos_interaction | Firmness_interaction_PCP006662 | 0.9563815611701084 |
| pos_interaction | Firmness_interaction_PCP002193 | 0.9565095344335738 |
| pos_interaction | Firmness_interaction_PCP027122 | 0.9566268235419825 |
| pos_interaction | Firmness_interaction_PCP007191 | 0.9567079252307915 |
| pos_interaction | Firmness_interaction_PCP017900 | 0.9567533566014819 |
| pos_interaction | Firmness_interaction_PCP011059 | 0.9569416639742703 |
| pos_interaction | Firmness_interaction_PCP042402 | 0.9569558082787482 |
| pos_interaction | Firmness_interaction_PCP030844 | 0.9571782469839134 |
| pos_interaction | Firmness_interaction_PCP028294 | 0.9573120130858458 |
| pos_interaction | Firmness_interaction_PCP011154 | 0.9573221764708058 |
| pos_interaction | Firmness_interaction_PCP016598 | 0.9573392969358944 |
| pos_interaction | Firmness_interaction_PCP030616 | 0.9573628357030922 |
| pos_interaction | Firmness_interaction_PCP039637 | 0.9575235444169083 |
| pos_interaction | Firmness_interaction_PCP009585 | 0.9575591378947865 |
| pos_interaction | Firmness_interaction_PCP008418 | 0.9576081777131772 |
| pos_interaction | Firmness_interaction_PCP027041 | 0.957762665047191  |
| pos_interaction | Firmness_interaction_PCP010675 | 0.9577924487421198 |
| pos_interaction | Firmness_interaction_PCP007614 | 0.9579244183332201 |
| pos_interaction | Firmness_interaction_PCP012575 | 0.9580174412179739 |
| pos_interaction | Firmness_interaction_PCP006627 | 0.9583506990801315 |
| pos_interaction | Firmness_interaction_PCP040696 | 0.9585248081724859 |
| pos_interaction | Firmness_interaction_PCP000171 | 0.9585443087768455 |
| pos_interaction | Firmness_interaction_PCP032535 | 0.9586905629283063 |
| pos_interaction | Firmness_interaction_PCP016361 | 0.9588544611341279 |
| pos_interaction | Firmness_interaction_PCP020898 | 0.9588580353215505 |
| pos_interaction | Firmness_interaction_PCP018095 | 0.9589272605399735 |
| pos_interaction | Firmness_interaction_PCP007999 | 0.958955372568957  |
| pos_interaction | Firmness_interaction_PCP028381 | 0.9589983680933087 |
| pos_interaction | Firmness_interaction_PCP017688 | 0.9592221911868427 |
| pos_interaction | Firmness_interaction_PCP034358 | 0.9593167266223002 |
| pos_interaction | Firmness_interaction_PCP016502 | 0.9594649412928958 |
| pos_interaction | Firmness_interaction_PCP021784 | 0.9594689002925435 |
| pos_interaction | Firmness_interaction_PCP012493 | 0.9595701279120149 |
| pos_interaction | Firmness_interaction_PCP024364 | 0.959629353572458  |
| pos_interaction | Firmness_interaction_PCP007168 | 0.9597791951959183 |
| pos_interaction | Firmness_interaction_PCP016835 | 0.9601040274079459 |

|                 |                                |                    |
|-----------------|--------------------------------|--------------------|
| pos_interaction | Firmness_interaction_PCP024818 | 0.9602524491166168 |
| pos_interaction | Firmness_interaction_PCP012403 | 0.9602561230893216 |
| pos_interaction | Firmness_interaction_PCP029022 | 0.9603832636048845 |
| pos_interaction | Firmness_interaction_PCP036392 | 0.9603881584800557 |
| pos_interaction | Firmness_interaction_PCP029386 | 0.960411894654011  |
| pos_interaction | Firmness_interaction_PCP025204 | 0.960514070153254  |
| pos_interaction | Firmness_interaction_PCP027273 | 0.9606050441495775 |
| pos_interaction | Firmness_interaction_PCP028698 | 0.9608075972953463 |
| pos_interaction | Firmness_interaction_PCP021749 | 0.9610584951992742 |
| pos_interaction | Firmness_interaction_PCP025082 | 0.9610671553604634 |
| pos_interaction | Firmness_interaction_PCP011485 | 0.9610786601426465 |
| pos_interaction | Firmness_interaction_PCP020396 | 0.9612552452268782 |
| pos_interaction | Firmness_interaction_PCP003910 | 0.9614330334471598 |
| pos_interaction | Firmness_interaction_PCP012628 | 0.9616021883573515 |
| pos_interaction | Firmness_interaction_PCP000535 | 0.9616039407355422 |
| pos_interaction | Firmness_interaction_PCP030505 | 0.9619848231614143 |
| pos_interaction | Firmness_interaction_PCP032254 | 0.9621818984384233 |
| pos_interaction | Firmness_interaction_PCP012414 | 0.9623780347538878 |
| pos_interaction | Firmness_interaction_PCP028011 | 0.9624054451636115 |
| pos_interaction | Firmness_interaction_PCP041398 | 0.9625891551780482 |
| pos_interaction | Firmness_interaction_PCP007333 | 0.9626134483180042 |
| pos_interaction | Firmness_interaction_PCP020779 | 0.9626857915784768 |
| pos_interaction | Firmness_interaction_PCP013589 | 0.962701792033716  |
| pos_interaction | Firmness_interaction_PCP024844 | 0.9627110000265345 |
| pos_interaction | Firmness_interaction_PCP011926 | 0.9628367267237481 |
| pos_interaction | Firmness_interaction_PCP022356 | 0.9628453227167246 |
| pos_interaction | Firmness_interaction_PCP000668 | 0.9629380635112932 |
| pos_interaction | Firmness_interaction_PCP040285 | 0.9629929138051516 |
| pos_interaction | Firmness_interaction_PCP007634 | 0.9630568679076725 |
| pos_interaction | Firmness_interaction_PCP024457 | 0.9631253203661233 |
| pos_interaction | Firmness_interaction_PCP024179 | 0.9631771065662437 |
| pos_interaction | Firmness_interaction_PCP019466 | 0.9633524003493931 |
| pos_interaction | Firmness_interaction_PCP010049 | 0.9634386858039273 |
| pos_interaction | Firmness_interaction_PCP016799 | 0.9635211134637601 |
| pos_interaction | Firmness_interaction_PCP008538 | 0.963634066271963  |
| pos_interaction | Firmness_interaction_PCP007802 | 0.9636401819515017 |
| pos_interaction | Firmness_interaction_PCP031506 | 0.9638329662749111 |
| pos_interaction | Firmness_interaction_PCP000167 | 0.9638722533915441 |
| pos_interaction | Firmness_interaction_PCP043243 | 0.9639543571624571 |
| pos_interaction | Firmness_interaction_PCP032025 | 0.9642260464417549 |
| pos_interaction | Firmness_interaction_PCP005562 | 0.9642709325314841 |
| pos_interaction | Firmness_interaction_PCP042842 | 0.9642871865953995 |
| pos_interaction | Firmness_interaction_PCP020926 | 0.9644206662144528 |
| pos_interaction | Firmness_interaction_PCP024678 | 0.9644282099935102 |
| pos_interaction | Firmness_interaction_PCP008486 | 0.9644811300866513 |
| pos_interaction | Firmness_interaction_PCP007099 | 0.9646010289470278 |



|                 |                                |                    |
|-----------------|--------------------------------|--------------------|
| pos_interaction | Firmness_interaction_PCP002857 | 0.9646272454117867 |
| pos_interaction | Firmness_interaction_PCP019562 | 0.9646501673554957 |
| pos_interaction | Firmness_interaction_PCP013462 | 0.9647632661716907 |
| pos_interaction | Firmness_interaction_PCP009027 | 0.9647799991364654 |
| pos_interaction | Firmness_interaction_PCP011471 | 0.964789309134043  |
| pos_interaction | Firmness_interaction_PCP024427 | 0.9649044743948654 |
| pos_interaction | Firmness_interaction_PCP025797 | 0.9649156014436976 |
| pos_interaction | Firmness_interaction_PCP034151 | 0.9649703806891761 |
| pos_interaction | Firmness_interaction_PCP030147 | 0.9649953944466683 |
| pos_interaction | Firmness_interaction_PCP007048 | 0.9650358491417966 |
| pos_interaction | Firmness_interaction_PCP039702 | 0.9650618684618748 |
| pos_interaction | Firmness_interaction_PCP007754 | 0.9650741721440594 |
| pos_interaction | Firmness_interaction_PCP013255 | 0.9650759783687731 |
| pos_interaction | Firmness_interaction_PCP020355 | 0.965356405187545  |
| pos_interaction | Firmness_interaction_PCP024628 | 0.9654986320633694 |
| pos_interaction | Firmness_interaction_PCP003006 | 0.9655144280768518 |
| pos_interaction | Firmness_interaction_PCP028178 | 0.9655950777147648 |
| pos_interaction | Firmness_interaction_PCP019655 | 0.9656489394951893 |
| pos_interaction | Firmness_interaction_PCP003894 | 0.9658887577586295 |
| pos_interaction | Firmness_interaction_PCP012540 | 0.9660159260557251 |
| pos_interaction | Firmness_interaction_PCP021057 | 0.966338228671843  |
| pos_interaction | Firmness_interaction_PCP013053 | 0.9663679371437722 |
| pos_interaction | Firmness_interaction_PCP015263 | 0.9665022135901749 |
| pos_interaction | Firmness_interaction_PCP010055 | 0.9665293199909647 |
| pos_interaction | Firmness_interaction_PCP032181 | 0.9666611220113819 |
| pos_interaction | Firmness_interaction_PCP011513 | 0.9668277284679141 |
| pos_interaction | Firmness_interaction_PCP026183 | 0.9669555186663595 |
| pos_interaction | Firmness_interaction_PCP025854 | 0.9670045854902436 |
| pos_interaction | Firmness_interaction_PCP035592 | 0.9670359979389446 |
| pos_interaction | Firmness_interaction_PCP024649 | 0.9674589826796556 |
| pos_interaction | Firmness_interaction_PCP026332 | 0.9675757632791445 |
| pos_interaction | Firmness_interaction_PCP019416 | 0.9676050909307586 |
| pos_interaction | Firmness_interaction_PCP008537 | 0.9676486782532764 |
| pos_interaction | Firmness_interaction_PCP027619 | 0.9677977396383992 |
| pos_interaction | Firmness_interaction_PCP032188 | 0.9678106756306969 |
| pos_interaction | Firmness_interaction_PCP038435 | 0.9678225565075996 |
| pos_interaction | Firmness_interaction_PCP039124 | 0.9678385095888087 |
| pos_interaction | Firmness_interaction_PCP016724 | 0.9678586106797692 |
| pos_interaction | Firmness_interaction_PCP012437 | 0.9678854003725479 |
| pos_interaction | Firmness_interaction_PCP016072 | 0.9679354805386845 |
| pos_interaction | Firmness_interaction_PCP028788 | 0.9681511197879843 |
| pos_interaction | Firmness_interaction_PCP016065 | 0.9682207311710284 |
| pos_interaction | Firmness_interaction_PCP030726 | 0.9683677859455572 |
| pos_interaction | Firmness_interaction_PCP040594 | 0.9683884731849524 |
| pos_interaction | Firmness_interaction_PCP000771 | 0.9684985450386255 |
| pos_interaction | Firmness_interaction_PCP013360 | 0.9685278184720347 |

|                 |                                |                    |
|-----------------|--------------------------------|--------------------|
| pos_interaction | Firmness_interaction_PCP028378 | 0.968589428168679  |
| pos_interaction | Firmness_interaction_PCP012899 | 0.9686906033473964 |
| pos_interaction | Firmness_interaction_PCP025645 | 0.968730297915072  |
| pos_interaction | Firmness_interaction_PCP017994 | 0.9688036559202989 |
| pos_interaction | Firmness_interaction_PCP039947 | 0.9688883706037889 |
| pos_interaction | Firmness_interaction_PCP044694 | 0.9690981143821852 |
| pos_interaction | Firmness_interaction_PCP028623 | 0.9693096939987194 |
| pos_interaction | Firmness_interaction_PCP035757 | 0.969319992052756  |
| pos_interaction | Firmness_interaction_PCP020421 | 0.969502238372106  |
| pos_interaction | Firmness_interaction_PCP010847 | 0.9695733423741308 |
| pos_interaction | Firmness_interaction_PCP017302 | 0.969610826323326  |
| pos_interaction | Firmness_interaction_PCP018273 | 0.9696530858842791 |
| pos_interaction | Firmness_interaction_PCP019649 | 0.9697430607870144 |
| pos_interaction | Firmness_interaction_PCP017485 | 0.9698313419293054 |
| pos_interaction | Firmness_interaction_PCP009808 | 0.9700886075206192 |
| pos_interaction | Firmness_interaction_PCP008208 | 0.9702998925343608 |
| pos_interaction | Firmness_interaction_PCP021693 | 0.9703689240471632 |
| pos_interaction | Firmness_interaction_PCP019692 | 0.9706281267453976 |
| pos_interaction | Firmness_interaction_PCP005531 | 0.9707381685476837 |
| pos_interaction | Firmness_interaction_PCP023637 | 0.9707389573968752 |
| pos_interaction | Firmness_interaction_PCP013684 | 0.9708037459219322 |
| pos_interaction | Firmness_interaction_PCP014611 | 0.9708422196919102 |
| pos_interaction | Firmness_interaction_PCP018057 | 0.9708490397421046 |
| pos_interaction | Firmness_interaction_PCP010767 | 0.9710119792539132 |
| pos_interaction | Firmness_interaction_PCP017660 | 0.9711824388673148 |
| pos_interaction | Firmness_interaction_PCP028225 | 0.9712659288407536 |
| pos_interaction | Firmness_interaction_PCP010261 | 0.9712748796376891 |
| pos_interaction | Firmness_interaction_PCP012039 | 0.9713337771100865 |
| pos_interaction | Firmness_interaction_PCP016755 | 0.9713375561405816 |
| pos_interaction | Firmness_interaction_PCP033246 | 0.9717749917457593 |
| pos_interaction | Firmness_interaction_PCP027769 | 0.9718839556543236 |
| pos_interaction | Firmness_interaction_PCP024510 | 0.9718941603077885 |
| pos_interaction | Firmness_interaction_PCP010074 | 0.9721354399248013 |
| pos_interaction | Firmness_interaction_PCP027002 | 0.972148972692616  |
| pos_interaction | Firmness_interaction_PCP040118 | 0.9722162769893331 |
| pos_interaction | Firmness_interaction_PCP021810 | 0.9722720733264635 |
| pos_interaction | Firmness_interaction_PCP005409 | 0.9727378828660213 |
| pos_interaction | Firmness_interaction_PCP021875 | 0.972787082277896  |
| pos_interaction | Firmness_interaction_PCP007189 | 0.9730354195679011 |
| pos_interaction | Firmness_interaction_PCP023878 | 0.9732248699667412 |
| pos_interaction | Firmness_interaction_PCP013622 | 0.9733051915342102 |
| pos_interaction | Firmness_interaction_PCP039813 | 0.9734235718444559 |
| pos_interaction | Firmness_interaction_PCP023151 | 0.9736585716277383 |
| pos_interaction | Firmness_interaction_PCP028057 | 0.9737393255015389 |
| pos_interaction | Firmness_interaction_PCP042186 | 0.9737504321593505 |
| pos_interaction | Firmness_interaction_PCP023352 | 0.9739141107415112 |

|                 |                                |                    |
|-----------------|--------------------------------|--------------------|
| pos_interaction | Firmness_interaction_PCP036703 | 0.9741006291341892 |
| pos_interaction | Firmness_interaction_PCP031690 | 0.9741297374143163 |
| pos_interaction | Firmness_interaction_PCP014886 | 0.974458736648902  |
| pos_interaction | Firmness_interaction_PCP018708 | 0.9746099955083767 |
| pos_interaction | Firmness_interaction_PCP006878 | 0.9746517744431611 |
| pos_interaction | Firmness_interaction_PCP020062 | 0.9746520047576451 |
| pos_interaction | Firmness_interaction_PCP025102 | 0.97469514036704   |
| pos_interaction | Firmness_interaction_PCP031105 | 0.974796143818488  |
| pos_interaction | Firmness_interaction_PCP017358 | 0.9749291826424128 |
| pos_interaction | Firmness_interaction_PCP004206 | 0.9749402666727625 |
| pos_interaction | Firmness_interaction_PCP004198 | 0.9749717071014639 |
| pos_interaction | Firmness_interaction_PCP005413 | 0.9749893255591611 |
| pos_interaction | Firmness_interaction_PCP007739 | 0.975383507167378  |
| pos_interaction | Firmness_interaction_PCP007595 | 0.9753849327886563 |
| pos_interaction | Firmness_interaction_PCP028751 | 0.9753878685750937 |
| pos_interaction | Firmness_interaction_PCP006133 | 0.9754219308782589 |
| pos_interaction | Firmness_interaction_PCP012075 | 0.9755458015853238 |
| pos_interaction | Firmness_interaction_PCP026440 | 0.9755526489189172 |
| pos_interaction | Firmness_interaction_PCP022615 | 0.9758261743320431 |
| pos_interaction | Firmness_interaction_PCP026164 | 0.9758409842638224 |
| pos_interaction | Firmness_interaction_PCP024976 | 0.9759105544718666 |
| pos_interaction | Firmness_interaction_PCP016512 | 0.9759274065797615 |
| pos_interaction | Firmness_interaction_PCP020841 | 0.976266166088413  |
| pos_interaction | Firmness_interaction_PCP008851 | 0.9762979019178469 |
| pos_interaction | Firmness_interaction_PCP033131 | 0.9764646156394854 |
| pos_interaction | Firmness_interaction_PCP033152 | 0.9765156586690817 |
| pos_interaction | Firmness_interaction_PCP010484 | 0.9765726620556148 |
| pos_interaction | Firmness_interaction_PCP001467 | 0.9766364137082065 |
| pos_interaction | Firmness_interaction_PCP017504 | 0.9766508345775379 |
| pos_interaction | Firmness_interaction_PCP006791 | 0.9768014968575477 |
| pos_interaction | Firmness_interaction_PCP023195 | 0.9769210108460687 |
| pos_interaction | Firmness_interaction_PCP015489 | 0.9769271756045403 |
| pos_interaction | Firmness_interaction_PCP001313 | 0.9770591516686582 |
| pos_interaction | Firmness_interaction_PCP011734 | 0.9770720504154944 |
| pos_interaction | Firmness_interaction_PCP030207 | 0.9771535623887093 |
| pos_interaction | Firmness_interaction_PCP025793 | 0.9771560061516211 |
| pos_interaction | Firmness_interaction_PCP023455 | 0.9772347025037973 |
| pos_interaction | Firmness_interaction_PCP024242 | 0.9772404552342593 |
| pos_interaction | Firmness_interaction_PCP032375 | 0.977268135125683  |
| pos_interaction | Firmness_interaction_PCP034953 | 0.9775449292575122 |
| pos_interaction | Firmness_interaction_PCP005274 | 0.9776333310368385 |
| pos_interaction | Firmness_interaction_PCP015860 | 0.9776987084458212 |
| pos_interaction | Firmness_interaction_PCP011760 | 0.9777224169572993 |
| pos_interaction | Firmness_interaction_PCP009832 | 0.9777502224660164 |
| pos_interaction | Firmness_interaction_PCP036209 | 0.9778109388734881 |
| pos_interaction | Firmness_interaction_PCP001691 | 0.9778312750778182 |

|                 |                                |                    |
|-----------------|--------------------------------|--------------------|
| pos_interaction | Firmness_interaction_PCP026039 | 0.977920821393814  |
| pos_interaction | Firmness_interaction_PCP005855 | 0.9779640123918746 |
| pos_interaction | Firmness_interaction_PCP044000 | 0.9780045509296573 |
| pos_interaction | Firmness_interaction_PCP035017 | 0.978090552189366  |
| pos_interaction | Firmness_interaction_PCP010025 | 0.9782557591392541 |
| pos_interaction | Firmness_interaction_PCP002867 | 0.978384222536316  |
| pos_interaction | Firmness_interaction_PCP005141 | 0.9783933006495843 |
| pos_interaction | Firmness_interaction_PCP011867 | 0.978412960294434  |
| pos_interaction | Firmness_interaction_PCP035228 | 0.9786359319923137 |
| pos_interaction | Firmness_interaction_PCP039795 | 0.9787184611783453 |
| pos_interaction | Firmness_interaction_PCP019752 | 0.9788910633237318 |
| pos_interaction | Firmness_interaction_PCP006413 | 0.9789414930733523 |
| pos_interaction | Firmness_interaction_PCP018093 | 0.9790309193272188 |
| pos_interaction | Firmness_interaction_PCP026024 | 0.9791076161755737 |
| pos_interaction | Firmness_interaction_PCP004369 | 0.97915122540583   |
| pos_interaction | Firmness_interaction_PCP021612 | 0.9791853725545675 |
| pos_interaction | Firmness_interaction_PCP023759 | 0.979199146564898  |
| pos_interaction | Firmness_interaction_PCP015830 | 0.9792401454545713 |
| pos_interaction | Firmness_interaction_PCP007629 | 0.979274541434036  |
| pos_interaction | Firmness_interaction_PCP016914 | 0.9793391859307352 |
| pos_interaction | Firmness_interaction_PCP023650 | 0.9794869552682142 |
| pos_interaction | Firmness_interaction_PCP029939 | 0.9795203018051145 |
| pos_interaction | Firmness_interaction_PCP007628 | 0.979557719119509  |
| pos_interaction | Firmness_interaction_PCP027303 | 0.9796042796765054 |
| pos_interaction | Firmness_interaction_PCP023098 | 0.9796584348168215 |
| pos_interaction | Firmness_interaction_PCP019412 | 0.9797162607846586 |
| pos_interaction | Firmness_interaction_PCP011417 | 0.979880280412906  |
| pos_interaction | Firmness_interaction_PCP027431 | 0.979900363972099  |
| pos_interaction | Firmness_interaction_PCP043652 | 0.9799324666951716 |
| pos_interaction | Firmness_interaction_PCP005066 | 0.9802369478064582 |
| pos_interaction | Firmness_interaction_PCP011698 | 0.9802784025506164 |
| pos_interaction | Firmness_interaction_PCP042671 | 0.9803008286428097 |
| pos_interaction | Firmness_interaction_PCP036488 | 0.9804155969422965 |
| pos_interaction | Firmness_interaction_PCP009854 | 0.9804430270921568 |
| pos_interaction | Firmness_interaction_PCP007847 | 0.9804922314337504 |
| pos_interaction | Firmness_interaction_PCP014364 | 0.9804970810580705 |
| pos_interaction | Firmness_interaction_PCP000117 | 0.9805884171728033 |
| pos_interaction | Firmness_interaction_PCP027568 | 0.98064279536112   |
| pos_interaction | Firmness_interaction_PCP004786 | 0.9806854016418471 |
| pos_interaction | Firmness_interaction_PCP029231 | 0.9807434619275327 |
| pos_interaction | Firmness_interaction_PCP026145 | 0.980809252794464  |
| pos_interaction | Firmness_interaction_PCP015275 | 0.9808243171122937 |
| pos_interaction | Firmness_interaction_PCP017906 | 0.9809899980928345 |
| pos_interaction | Firmness_interaction_PCP013434 | 0.9810104542924768 |
| pos_interaction | Firmness_interaction_PCP023102 | 0.9811072610023688 |
| pos_interaction | Firmness_interaction_PCP030120 | 0.9811236424507013 |

|                 |                                |                    |
|-----------------|--------------------------------|--------------------|
| pos_interaction | Firmness_interaction_PCP029445 | 0.9811718060498513 |
| pos_interaction | Firmness_interaction_PCP026221 | 0.981432915641986  |
| pos_interaction | Firmness_interaction_PCP032513 | 0.9817622761251529 |
| pos_interaction | Firmness_interaction_PCP036007 | 0.9817644894141283 |
| pos_interaction | Firmness_interaction_PCP027900 | 0.9818745566219382 |
| pos_interaction | Firmness_interaction_PCP025125 | 0.9819011215602257 |
| pos_interaction | Firmness_interaction_PCP018920 | 0.9819365180317049 |
| pos_interaction | Firmness_interaction_PCP008956 | 0.9822284758157882 |
| pos_interaction | Firmness_interaction_PCP001968 | 0.9822715412673516 |
| pos_interaction | Firmness_interaction_PCP014204 | 0.9823443217651224 |
| pos_interaction | Firmness_interaction_PCP026064 | 0.982359007796334  |
| pos_interaction | Firmness_interaction_PCP008572 | 0.9823684957125547 |
| pos_interaction | Firmness_interaction_PCP025146 | 0.982392923857808  |
| pos_interaction | Firmness_interaction_PCP031008 | 0.9826580783857523 |
| pos_interaction | Firmness_interaction_PCP003707 | 0.9826836663718189 |
| pos_interaction | Firmness_interaction_PCP040467 | 0.9828085434871915 |
| pos_interaction | Firmness_interaction_PCP013964 | 0.982861386317872  |
| pos_interaction | Firmness_interaction_PCP019427 | 0.9828679874257666 |
| pos_interaction | Firmness_interaction_PCP040042 | 0.9829114893695254 |
| pos_interaction | Firmness_interaction_PCP015739 | 0.9829516992070796 |
| pos_interaction | Firmness_interaction_PCP017752 | 0.9830688223071423 |
| pos_interaction | Firmness_interaction_PCP036761 | 0.9831266505012604 |
| pos_interaction | Firmness_interaction_PCP025528 | 0.9831333853901764 |
| pos_interaction | Firmness_interaction_PCP013616 | 0.9832620306448777 |
| pos_interaction | Firmness_interaction_PCP040769 | 0.9833205404274731 |
| pos_interaction | Firmness_interaction_PCP025052 | 0.9834076130711549 |
| pos_interaction | Firmness_interaction_PCP029443 | 0.9835772817967128 |
| pos_interaction | Firmness_interaction_PCP001279 | 0.9835933223930735 |
| pos_interaction | Firmness_interaction_PCP027594 | 0.9836544930871565 |
| pos_interaction | Firmness_interaction_PCP009402 | 0.9838694452050474 |
| pos_interaction | Firmness_interaction_PCP023176 | 0.9840202264528305 |
| pos_interaction | Firmness_interaction_PCP026580 | 0.984040515935136  |
| pos_interaction | Firmness_interaction_PCP012439 | 0.9841278765843035 |
| pos_interaction | Firmness_interaction_PCP010455 | 0.984130813531318  |
| pos_interaction | Firmness_interaction_PCP015752 | 0.9841881289979234 |
| pos_interaction | Firmness_interaction_PCP030782 | 0.9842201976229236 |
| pos_interaction | Firmness_interaction_PCP007240 | 0.9843957608969081 |
| pos_interaction | Firmness_interaction_PCP031379 | 0.9844601074514729 |
| pos_interaction | Firmness_interaction_PCP032878 | 0.9844930353322121 |
| pos_interaction | Firmness_interaction_PCP018452 | 0.9845538342260399 |
| pos_interaction | Firmness_interaction_PCP010597 | 0.9845987354903825 |
| pos_interaction | Firmness_interaction_PCP014093 | 0.9847074854669808 |
| pos_interaction | Firmness_interaction_PCP001219 | 0.9851916413019335 |
| pos_interaction | Firmness_interaction_PCP003341 | 0.9852027680534783 |
| pos_interaction | Firmness_interaction_PCP002905 | 0.985332604191773  |
| pos_interaction | Firmness_interaction_PCP014251 | 0.9854177613041161 |

|                 |                                |                    |
|-----------------|--------------------------------|--------------------|
| pos_interaction | Firmness_interaction_PCP031705 | 0.9854252831642704 |
| pos_interaction | Firmness_interaction_PCP029669 | 0.9855359580945061 |
| pos_interaction | Firmness_interaction_PCP003566 | 0.9855403366169482 |
| pos_interaction | Firmness_interaction_PCP008041 | 0.9856824017927432 |
| pos_interaction | Firmness_interaction_PCP001961 | 0.9857700330993444 |
| pos_interaction | Firmness_interaction_PCP008611 | 0.9857792927213781 |
| pos_interaction | Firmness_interaction_PCP009532 | 0.9857805058158906 |
| pos_interaction | Firmness_interaction_PCP017342 | 0.9858273812758617 |
| pos_interaction | Firmness_interaction_PCP012254 | 0.9859254027855412 |
| pos_interaction | Firmness_interaction_PCP025596 | 0.9859935795955084 |
| pos_interaction | Firmness_interaction_PCP028380 | 0.9860080651042227 |
| pos_interaction | Firmness_interaction_PCP005202 | 0.9861228346459894 |
| pos_interaction | Firmness_interaction_PCP033179 | 0.9862086050537827 |
| pos_interaction | Firmness_interaction_PCP002933 | 0.9865199580892257 |
| pos_interaction | Firmness_interaction_PCP017315 | 0.9865880999136545 |
| pos_interaction | Firmness_interaction_PCP036084 | 0.9866753074159105 |
| pos_interaction | Firmness_interaction_PCP022634 | 0.9869207745813353 |
| pos_interaction | Firmness_interaction_PCP028332 | 0.987000909033789  |
| pos_interaction | Firmness_interaction_PCP018119 | 0.9870440552209252 |
| pos_interaction | Firmness_interaction_PCP012001 | 0.987157194193351  |
| pos_interaction | Firmness_interaction_PCP030309 | 0.9871677323560648 |
| pos_interaction | Firmness_interaction_PCP012388 | 0.9872034064065266 |
| pos_interaction | Firmness_interaction_PCP044677 | 0.9872182913532349 |
| pos_interaction | Firmness_interaction_PCP007489 | 0.9872371944380558 |
| pos_interaction | Firmness_interaction_PCP005035 | 0.9872622133717597 |
| pos_interaction | Firmness_interaction_PCP043963 | 0.9872809990862064 |
| pos_interaction | Firmness_interaction_PCP042050 | 0.9873220196447319 |
| pos_interaction | Firmness_interaction_PCP031273 | 0.9873782433308581 |
| pos_interaction | Firmness_interaction_PCP004639 | 0.9873879218551662 |
| pos_interaction | Firmness_interaction_PCP011597 | 0.9874817732783185 |
| pos_interaction | Firmness_interaction_PCP022859 | 0.9876139446682632 |
| pos_interaction | Firmness_interaction_PCP011275 | 0.9876212568806397 |
| pos_interaction | Firmness_interaction_PCP001150 | 0.9876355798397071 |
| pos_interaction | Firmness_interaction_PCP000531 | 0.9877005127331633 |
| pos_interaction | Firmness_interaction_PCP015476 | 0.9877547720685355 |
| pos_interaction | Firmness_interaction_PCP020570 | 0.9878123451853935 |
| pos_interaction | Firmness_interaction_PCP021687 | 0.9878129547449354 |
| pos_interaction | Firmness_interaction_PCP011929 | 0.9878889748529073 |
| pos_interaction | Firmness_interaction_PCP043409 | 0.9879362498613031 |
| pos_interaction | Firmness_interaction_PCP008306 | 0.9880741131276453 |
| pos_interaction | Firmness_interaction_PCP025980 | 0.9881972798565009 |
| pos_interaction | Firmness_interaction_PCP044442 | 0.9882128071819596 |
| pos_interaction | Firmness_interaction_PCP030424 | 0.9882391490252644 |
| pos_interaction | Firmness_interaction_PCP033836 | 0.9882687372216972 |
| pos_interaction | Firmness_interaction_PCP010238 | 0.9882699207799343 |
| pos_interaction | Firmness_interaction_PCP042778 | 0.9883894649154282 |

|                 |                                |                    |
|-----------------|--------------------------------|--------------------|
| pos_interaction | Firmness_interaction_PCP002706 | 0.9884098848425293 |
| pos_interaction | Firmness_interaction_PCP006961 | 0.9884638482203252 |
| pos_interaction | Firmness_interaction_PCP003151 | 0.9885096502469213 |
| pos_interaction | Firmness_interaction_PCP040050 | 0.9885130145424225 |
| pos_interaction | Firmness_interaction_PCP027641 | 0.9885706055505757 |
| pos_interaction | Firmness_interaction_PCP002307 | 0.9886541132523867 |
| pos_interaction | Firmness_interaction_PCP028644 | 0.9886764551135169 |
| pos_interaction | Firmness_interaction_PCP044438 | 0.9887677415931724 |
| pos_interaction | Firmness_interaction_PCP007969 | 0.9890864932706825 |
| pos_interaction | Firmness_interaction_PCP001059 | 0.9891098825364056 |
| pos_interaction | Firmness_interaction_PCP023530 | 0.989114899906638  |
| pos_interaction | Firmness_interaction_PCP031536 | 0.989239870899502  |
| pos_interaction | Firmness_interaction_PCP017494 | 0.98926960868455   |
| pos_interaction | Firmness_interaction_PCP031530 | 0.9892918272298339 |
| pos_interaction | Firmness_interaction_PCP007510 | 0.9894072314047385 |
| pos_interaction | Firmness_interaction_PCP017009 | 0.9895045595224814 |
| pos_interaction | Firmness_interaction_PCP007034 | 0.9895200921351717 |
| pos_interaction | Firmness_interaction_PCP043663 | 0.9897903468412843 |
| pos_interaction | Firmness_interaction_PCP003557 | 0.9899021786697104 |
| pos_interaction | Firmness_interaction_PCP002525 | 0.989911439986627  |
| pos_interaction | Firmness_interaction_PCP011385 | 0.9899668467458405 |
| pos_interaction | Firmness_interaction_PCP040256 | 0.9899914395486688 |
| pos_interaction | Firmness_interaction_PCP004938 | 0.9900104689710408 |
| pos_interaction | Firmness_interaction_PCP013388 | 0.9900588945829073 |
| pos_interaction | Firmness_interaction_PCP008393 | 0.9902070799171256 |
| pos_interaction | Firmness_interaction_PCP023243 | 0.9902988209388285 |
| pos_interaction | Firmness_interaction_PCP002432 | 0.9903637368458678 |
| pos_interaction | Firmness_interaction_PCP030697 | 0.9903825149524359 |
| pos_interaction | Firmness_interaction_PCP028844 | 0.9905027722695099 |
| pos_interaction | Firmness_interaction_PCP018019 | 0.9905295833286869 |
| pos_interaction | Firmness_interaction_PCP009299 | 0.9905415286164151 |
| pos_interaction | Firmness_interaction_PCP002406 | 0.9906298809181748 |
| pos_interaction | Firmness_interaction_PCP000387 | 0.9906343725880462 |
| pos_interaction | Firmness_interaction_PCP000924 | 0.9908604227606785 |
| pos_interaction | Firmness_interaction_PCP029024 | 0.9908607004181461 |
| pos_interaction | Firmness_interaction_PCP024206 | 0.9909189691352114 |
| pos_interaction | Firmness_interaction_PCP030855 | 0.9909208048460291 |
| pos_interaction | Firmness_interaction_PCP008307 | 0.990939678128544  |
| pos_interaction | Firmness_interaction_PCP007868 | 0.991273212616154  |
| pos_interaction | Firmness_interaction_PCP027202 | 0.9913354074232252 |
| pos_interaction | Firmness_interaction_PCP012204 | 0.9915186731734558 |
| pos_interaction | Firmness_interaction_PCP018944 | 0.9916686870791176 |
| pos_interaction | Firmness_interaction_PCP040802 | 0.9917721758380016 |
| pos_interaction | Firmness_interaction_PCP043114 | 0.99191126970965   |
| pos_interaction | Firmness_interaction_PCP002044 | 0.9920865143661431 |
| pos_interaction | Firmness_interaction_PCP021477 | 0.9920931409019479 |

|                 |                                |                    |
|-----------------|--------------------------------|--------------------|
| pos_interaction | Firmness_interaction_PCP000287 | 0.9921363071115795 |
| pos_interaction | Firmness_interaction_PCP000429 | 0.9921761659513257 |
| pos_interaction | Firmness_interaction_PCP023554 | 0.9922182862909416 |
| pos_interaction | Firmness_interaction_PCP002165 | 0.9922953172009681 |
| pos_interaction | Firmness_interaction_PCP019537 | 0.9923819816804005 |
| pos_interaction | Firmness_interaction_PCP006656 | 0.9924303096176187 |
| pos_interaction | Firmness_interaction_PCP036833 | 0.9924939764629486 |
| pos_interaction | Firmness_interaction_PCP029128 | 0.9925866183045451 |
| pos_interaction | Firmness_interaction_PCP003499 | 0.9926321150923172 |
| pos_interaction | Firmness_interaction_PCP024366 | 0.9926786560647177 |
| pos_interaction | Firmness_interaction_PCP012937 | 0.9927170664787299 |
| pos_interaction | Firmness_interaction_PCP036199 | 0.9927221851568592 |
| pos_interaction | Firmness_interaction_PCP016390 | 0.9930122882638063 |
| pos_interaction | Firmness_interaction_PCP037899 | 0.9930336119970252 |
| pos_interaction | Firmness_interaction_PCP006414 | 0.9930588282033438 |
| pos_interaction | Firmness_interaction_PCP028442 | 0.9930971056592091 |
| pos_interaction | Firmness_interaction_PCP009169 | 0.9931570814139618 |
| pos_interaction | Firmness_interaction_PCP020651 | 0.9932025516451608 |
| pos_interaction | Firmness_interaction_PCP025929 | 0.9934096691518942 |
| pos_interaction | Firmness_interaction_PCP007917 | 0.9935145304180812 |
| pos_interaction | Firmness_interaction_PCP003322 | 0.993542701186548  |
| pos_interaction | Firmness_interaction_PCP013154 | 0.9936020075248384 |
| pos_interaction | Firmness_interaction_PCP025097 | 0.9937262678881355 |
| pos_interaction | Firmness_interaction_PCP016781 | 0.9937309467676687 |
| pos_interaction | Firmness_interaction_PCP041476 | 0.9937754741998704 |
| pos_interaction | Firmness_interaction_PCP032497 | 0.993784071226259  |
| pos_interaction | Firmness_interaction_PCP029513 | 0.9938271541978674 |
| pos_interaction | Firmness_interaction_PCP000331 | 0.9938714595610589 |
| pos_interaction | Firmness_interaction_PCP030272 | 0.9939252747578123 |
| pos_interaction | Firmness_interaction_PCP006880 | 0.9942106208007149 |
| pos_interaction | Firmness_interaction_PCP004971 | 0.9942552976003315 |
| pos_interaction | Firmness_interaction_PCP026875 | 0.9942611323144257 |
| pos_interaction | Firmness_interaction_PCP024932 | 0.9942943379532412 |
| pos_interaction | Firmness_interaction_PCP008655 | 0.9943247663503035 |
| pos_interaction | Firmness_interaction_PCP003533 | 0.9944208086838253 |
| pos_interaction | Firmness_interaction_PCP018847 | 0.9946385254041477 |
| pos_interaction | Firmness_interaction_PCP018614 | 0.9946889433147246 |
| pos_interaction | Firmness_interaction_PCP029690 | 0.9948921141455344 |
| pos_interaction | Firmness_interaction_PCP016152 | 0.9949147947274285 |
| pos_interaction | Firmness_interaction_PCP009020 | 0.9949296087729601 |
| pos_interaction | Firmness_interaction_PCP003459 | 0.9949911270452426 |
| pos_interaction | Firmness_interaction_PCP028794 | 0.9951060826414436 |
| pos_interaction | Firmness_interaction_PCP008973 | 0.9951410146665808 |
| pos_interaction | Firmness_interaction_PCP009782 | 0.9952674882740382 |
| pos_interaction | Firmness_interaction_PCP026694 | 0.9953807630313408 |
| pos_interaction | Firmness_interaction_PCP011013 | 0.9954942263411707 |



|                 |                                |                    |
|-----------------|--------------------------------|--------------------|
| pos_interaction | Firmness_interaction_PCP011689 | 0.9955172687971293 |
| pos_interaction | Firmness_interaction_PCP013937 | 0.9955784105654963 |
| pos_interaction | Firmness_interaction_PCP019013 | 0.9957726165446238 |
| pos_interaction | Firmness_interaction_PCP013897 | 0.9957946054580458 |
| pos_interaction | Firmness_interaction_PCP030646 | 0.9960886380799461 |
| pos_interaction | Firmness_interaction_PCP010035 | 0.9961213333156431 |
| pos_interaction | Firmness_interaction_PCP022982 | 0.9961691658152906 |
| pos_interaction | Firmness_interaction_PCP005572 | 0.9961802734260802 |
| pos_interaction | Firmness_interaction_PCP015273 | 0.9962525049961539 |
| pos_interaction | Firmness_interaction_PCP000523 | 0.9963063109276805 |
| pos_interaction | Firmness_interaction_PCP024317 | 0.996404632799667  |
| pos_interaction | Firmness_interaction_PCP009961 | 0.9964723862728854 |
| pos_interaction | Firmness_interaction_PCP024226 | 0.9965344438172086 |
| pos_interaction | Firmness_interaction_PCP021016 | 0.9965865087635233 |
| pos_interaction | Firmness_interaction_PCP014299 | 0.9966497930497679 |
| pos_interaction | Firmness_interaction_PCP022670 | 0.9967905332633553 |
| pos_interaction | Firmness_interaction_PCP041284 | 0.996794249838243  |
| pos_interaction | Firmness_interaction_PCP044309 | 0.9969329143394349 |
| pos_interaction | Firmness_interaction_PCP024261 | 0.996963404338055  |
| pos_interaction | Firmness_interaction_PCP035412 | 0.9969723437661157 |
| pos_interaction | Firmness_interaction_PCP005727 | 0.9969818069553421 |
| pos_interaction | Firmness_interaction_PCP022849 | 0.9970935314787813 |
| pos_interaction | Firmness_interaction_PCP011950 | 0.997310274379242  |
| pos_interaction | Firmness_interaction_PCP020253 | 0.9973744729977077 |
| pos_interaction | Firmness_interaction_PCP021315 | 0.9974229334352125 |
| pos_interaction | Firmness_interaction_PCP012976 | 0.9974864318653972 |
| pos_interaction | Firmness_interaction_PCP044141 | 0.9974935033443404 |
| pos_interaction | Firmness_interaction_PCP007160 | 0.9978302567911616 |
| pos_interaction | Firmness_interaction_PCP009922 | 0.9980822875863689 |
| pos_interaction | Firmness_interaction_PCP018084 | 0.9982635255592518 |
| pos_interaction | Firmness_interaction_PCP007096 | 0.9982681280622898 |
| pos_interaction | Firmness_interaction_PCP000385 | 0.9983537986100609 |
| pos_interaction | Firmness_interaction_PCP022315 | 0.9983807669358585 |
| pos_interaction | Firmness_interaction_PCP019046 | 0.9985327422658113 |
| pos_interaction | Firmness_interaction_PCP031591 | 0.9986254337257576 |
| pos_interaction | Firmness_interaction_PCP029075 | 0.9987623310460275 |
| pos_interaction | Firmness_interaction_PCP016236 | 0.9988055934485602 |
| pos_interaction | Firmness_interaction_PCP045037 | 0.9988335139689042 |
| pos_interaction | Firmness_interaction_PCP013757 | 0.9988354255578434 |
| pos_interaction | Firmness_interaction_PCP010943 | 0.9988451062794323 |
| pos_interaction | Firmness_interaction_PCP011931 | 0.9988837752328219 |
| pos_interaction | Firmness_interaction_PCP009121 | 0.9988849734846125 |
| pos_interaction | Firmness_interaction_PCP023293 | 0.9989140210095316 |
| pos_interaction | Firmness_interaction_PCP016401 | 0.9989718343368682 |
| pos_interaction | Firmness_interaction_PCP020578 | 0.9991264725811461 |
| pos_interaction | Firmness_interaction_PCP044687 | 0.9991862922843678 |

|                 |                                |                    |
|-----------------|--------------------------------|--------------------|
| pos_interaction | Firmness_interaction_PCP001807 | 0.9992065278102938 |
| pos_interaction | Firmness_interaction_PCP004748 | 0.9992534764199578 |
| pos_interaction | Firmness_interaction_PCP017056 | 0.999317660458235  |
| pos_interaction | Firmness_interaction_PCP009791 | 0.9993424559205382 |
| pos_interaction | Firmness_interaction_PCP041054 | 0.9993836594829353 |
| pos_interaction | Firmness_interaction_PCP000690 | 0.9994083322049064 |
| pos_interaction | Firmness_interaction_PCP043122 | 0.999412180816026  |
| pos_interaction | Firmness_interaction_PCP032339 | 0.999414218701544  |
| pos_interaction | Firmness_interaction_PCP022826 | 0.9994214642871279 |
| pos_interaction | Firmness_interaction_PCP021997 | 0.999481555945986  |
| pos_interaction | Firmness_interaction_PCP026394 | 0.9994925483092055 |
| pos_interaction | Firmness_interaction_PCP015694 | 0.9994985152299602 |
| pos_interaction | Firmness_interaction_PCP002370 | 0.999763756695111  |
| pos_interaction | Firmness_interaction_PCP012560 | 0.9998278905952158 |
| pos_interaction | Firmness_interaction_PCP018315 | 0.9998671815904856 |
| pos_interaction | Firmness_interaction_PCP012359 | 0.9999244611998958 |
| pos_interaction | Firmness_interaction_PCP016932 | 0.9999251785550011 |

Supplementary Table S5

| <b>primer name</b> | <b>primer sequence (5'-3')</b> | <b>target gene</b> |
|--------------------|--------------------------------|--------------------|
| Pc_ACS_for2        | ATGCTGGCTTGTTCTGTTGG           | PCP011500          |
| Pc_ACS_rev2        | AGGTTCCGTGCAATGACAAG           |                    |
| Pc_ACO_for1        | AAGGTCAGCAACTACCCTCC           | PCP011683          |
| Pc_ACO_rev1        | TGTCATCCTGGAAGAGCAGG           |                    |
| Pc_ERS1_for2       | TGAAGTTCACAAAGCAGGGC           | PCP004450          |
| Pc_ERS1_rev2       | CGTAGGTAGAAGTGCCCTC            |                    |
| Pc_ERS2_for1       | TGACTGTTGCCAAGGTTTCG           | PCP026971          |
| Pc_ERS2_rev1       | GACAGCTCCCGTTTCTTGAC           |                    |
| Pc_ERF1_for2       | AACATTGAAACGGCGGAAG            | PCP015040          |
| Pc_ERF1_rev2       | CGAGGACTGAGACGCATTTG           |                    |
| Pc_ERF2_for1       | TGGCTTCACTCCAGATGACC           | PCP002056          |
| Pc_ERF2_rev1       | ATATCCGGCATTTCGCACC            |                    |
| Pc_IAA_for2        | AAACCAGTTGAAACCAGCGG           | PCP003908          |
| Pc_IAA_rev2        | CGGAAGAGTTCATCGACAGC           |                    |
| Pc_PG1_for2        | GGAGTGTGTGAATGGAGC             | PCP006771          |
| Pc_PG1_rev2        | TCTGGTCGATGATGATGGGG           |                    |
| Pc_LOX1_for1       | CTTCAACGGAGAATCAGGCG           | PCP002320          |
| Pc_LOX1_rev1       | TCGGTTATGTCATCGAGGGG           |                    |
| Pc_ADH2_for1       | GTTTGTTACCTAAGCCGGG            | PCP031262          |
| Pc_ADH2_rev1       | TAGCAACCCGACAATTTGGC           |                    |
| Pc_AAT2_for2       | AGAGGCGCAGATGCACCATC           | PCP024687          |
| Pc_AAT2_rev2       | GTTACTGAATGCGTATGAGCCATC       |                    |
| Pc_HPL2_for2       | CTCTCTCAACCACAACCACAACC        | PCP012365          |
| Pc_HPL2_rev2       | CTCGGTGCGCTTCTTGAAG            |                    |
| Md_8283_for        | CTCGTCGTCTTGTCCCTGA            | PCP030439          |
| Md_8283_rev        | GCCTAAGGACAGGTGGTCTATG         |                    |
